# Supplementary material
Source: Research Square preprint supplement (doi:10.21203/rs.3.rs-8699542/v1)
Supplement: Supplementary file 1 [file 257f9f9b9c2901ead674d43e.xlsx]

## Sheet: Output capacity (B1)
County/District	ID	Year	City	Common cultivated land area(Hectare)	Grain output per unit area(tons/ha)	Gross output value of agriculture, forestry, animal husbandry and fishery(million yuan)	CC1	CC2	CC3
Chang’an District	1	2012	Xi’an City	44219	8.34062	31	44219	8.34062	31
Chang’an District	1	2013	Xi’an City	43579	8.20808	31	43579	8.20808	31
Chang’an District	1	2014	Xi’an City	41980	8.06098	40	41980	8.06098	40
Chang’an District	1	2015	Xi’an City	41428	8.34906	.	41428	8.34906	41.5
Chang’an District	1	2016	Xi’an City	39355	8.44658	43	39355	8.44658	43
Chang’an District	1	2017	Xi’an City	32215	8.23405	39	32215	8.23405	39
Chang’an District	1	2018	Xi’an City	31229	5.00311	24	31229	5.00311	24
Chang’an District	1	2019	Xi’an City	31253	5.04009	27	31253	5.04009	27
Chang’an District	1	2020	Xi’an City	.	.	197	31277	5.07708	197
Chang’an District	1	2021	Xi’an City	.	.	.	31301	5.11406	367
Baqiao District	2	2012	Xi’an City	10511	5.81125	245553	10511	5.81125	245553
Baqiao District	2	2013	Xi’an City	9840	5.72866	279503	9840	5.72866	279503
Baqiao District	2	2014	Xi’an City	9241	5.7194	300728	9241	5.7194	300728
Baqiao District	2	2015	Xi’an City	8709	6.20863	307940	8709	6.20863	307940
Baqiao District	2	2016	Xi’an City	5242	10.028	327061	5242	10.028	327061
Baqiao District	2	2017	Xi’an City	4840	10.2572	364717	4840	10.2572	364717
Baqiao District	2	2018	Xi’an City	4438	6.23547	311278	4438	6.23547	311278
Baqiao District	2	2019	Xi’an City	3715	6.64441	327267	3715	6.64441	327267
Baqiao District	2	2020	Xi’an City	.	.	342532	2992	7.05336	342532
Baqiao District	2	2021	Xi’an City	.	.	.	2269	7.46231	357797
Yanta District	3	2012	Xi’an City	564	.	32760	564		32760
Yanta District	3	2013	Xi’an City	434	.	31763	434		31763
Yanta District	3	2014	Xi’an City	434	.	26798	434		26798
Yanta District	3	2015	Xi’an City	.	.	3205	434		3205
Yanta District	3	2016	Xi’an City	.	.	.	434		-20388
Yanta District	3	2017	Xi’an City	.	.	.	434		-43981
Yanta District	3	2018	Xi’an City	.	.	.	434		-67574
Yanta District	3	2019	Xi’an City	.	.	.	434		-91167
Yanta District	3	2020	Xi’an City	.	.	.	434		-114760
Yanta District	3	2021	Xi’an City	.	.	.	434		-138353
Weiyang District	4	2012	Xi’an City	1468	10.6914	36525	1468	10.6914	36525
Weiyang District	4	2013	Xi’an City	1386	5.78066	25320	1386	5.78066	25320
Weiyang District	4	2014	Xi’an City	1047	3.81757	19090	1047	3.81757	19090
Weiyang District	4	2015	Xi’an City	833	2.36255	25786	833	2.36254	25786
Weiyang District	4	2016	Xi’an City	404	1.9802	20405	404	1.9802	20405
Weiyang District	4	2017	Xi’an City	121	0.92562	13836	121	0.92562	13836
Weiyang District	4	2018	Xi’an City	121	0.504132	8814	121	0.504132	8814
Weiyang District	4	2019	Xi’an City	106	0.669811	6419	106	0.669811	6419
Weiyang District	4	2020	Xi’an City	.	.	.	91	0.83549	4024
Weiyang District	4	2021	Xi’an City	.	.	.	76	1.00117	1629
Beilin District	5	2012	Xi’an City	.	.	.
Beilin District	5	2013	Xi’an City	.	.	.
Beilin District	5	2014	Xi’an City	.	.	.
Beilin District	5	2015	Xi’an City	.	.	.
Beilin District	5	2016	Xi’an City	.	.	.
Beilin District	5	2017	Xi’an City	.	.	.
Beilin District	5	2018	Xi’an City	.	.	.
Beilin District	5	2019	Xi’an City	.	.	.
Beilin District	5	2020	Xi’an City	.	.	.
Beilin District	5	2021	Xi’an City	.	.	.
Xincheng District	6	2012	Xi’an City	.	.	.
Xincheng District	6	2013	Xi’an City	.	.	.
Xincheng District	6	2014	Xi’an City	.	.	.
Xincheng District	6	2015	Xi’an City	.	.	.
Xincheng District	6	2016	Xi’an City	.	.	.
Xincheng District	6	2017	Xi’an City	.	.	.
Xincheng District	6	2018	Xi’an City	.	.	.
Xincheng District	6	2019	Xi’an City	.	.	.
Xincheng District	6	2020	Xi’an City	.	.	.
Xincheng District	6	2021	Xi’an City	.	.	.
Lianhu District	7	2012	Xi’an City	.	.	.
Lianhu District	7	2013	Xi’an City	.	.	.
Lianhu District	7	2014	Xi’an City	.	.	.
Lianhu District	7	2015	Xi’an City	.	.	.
Lianhu District	7	2016	Xi’an City	.	.	.
Lianhu District	7	2017	Xi’an City	.	.	.
Lianhu District	7	2018	Xi’an City	.	.	.
Lianhu District	7	2019	Xi’an City	.	.	.
Lianhu District	7	2020	Xi’an City	.	.	.
Lianhu District	7	2021	Xi’an City	.	.	.
Lintong District	8	2012	Xi’an City	46994	7.48342	468170	46994	7.48342	468170
Lintong District	8	2013	Xi’an City	46873	6.97222	515993	46873	6.97222	515993
Lintong District	8	2014	Xi’an City	46492	6.83709	538221	46492	6.83709	538221
Lintong District	8	2015	Xi’an City	46246	7.10626	551556	46246	7.10626	551556
Lintong District	8	2016	Xi’an City	45926	6.9001	569391	45926	6.9001	569391
Lintong District	8	2017	Xi’an City	45862	6.64548	588206	45862	6.64548	588206
Lintong District	8	2018	Xi’an City	45795	7.186	601608	45795	7.186	601608
Lintong District	8	2019	Xi’an City	44147	7.53408	666124	44147	7.53408	666124
Lintong District	8	2020	Xi’an City	.	.	.	42499	7.88216	730640
Lintong District	8	2021	Xi’an City	.	.	.	40851	8.23023	795156
Gaoling District	9	2012	Xi’an City	15244	13.1361	334939	15244	13.1361	334939
Gaoling District	9	2013	Xi’an City	15197	13.042	399495	15197	13.042	399495
Gaoling District	9	2014	Xi’an City	15126	12.5859	468141	15126	12.5859	468141
Gaoling District	9	2015	Xi’an City	15076	12.7857	495452	15076	12.7857	495452
Gaoling District	9	2016	Xi’an City	37467	5.01185	555928	37467	5.01185	555928
Gaoling District	9	2017	Xi’an City	14605	12.2711	607588	14605	12.2711	607588
Gaoling District	9	2018	Xi’an City	14807	8.34457	482906	14807	8.34457	482906
Gaoling District	9	2019	Xi’an City	14768	8.32381	528930	14768	8.32381	528930
Gaoling District	9	2020	Xi’an City	.	.	.	14729	8.30305	574954
Gaoling District	9	2021	Xi’an City	.	.	.	14690	8.28229	620978
Huyi District	10	2012	Xi’an City	38160	8.22065	407108	38160	8.22065	407108
Huyi District	10	2013	Xi’an City	38003	7.98358	447149	38003	7.98358	447149
Huyi District	10	2014	Xi’an City	37535	7.88616	481686	37535	7.88616	481686
Huyi District	10	2015	Xi’an City	37521	8.12726	496155	37521	8.12726	496155
Huyi District	10	2016	Xi’an City	32881	9.05617	515503	32881	9.05617	515503
Huyi District	10	2017	Xi’an City	35244	7.6325	496405	35244	7.6325	496405
Huyi District	10	2018	Xi’an City	33685	5.67953	447692	33685	5.67953	447692
Huyi District	10	2019	Xi’an City	33647	5.822	484760	33647	5.822	484760
Huyi District	10	2020	Xi’an City	.	.	.	33609	5.96448	521828
Huyi District	10	2021	Xi’an City	.	.	.	33571	6.10695	558896
Lantian County	11	2012	Xi’an City	40400	7.17225	401514	40400	7.17225	401514
Lantian County	11	2013	Xi’an City	39879	6.63507	436071	39879	6.63507	436071
Lantian County	11	2014	Xi’an City	39733	6.3071	462420	39733	6.3071	462420
Lantian County	11	2015	Xi’an City	39680	6.56305	465601	39680	6.56305	465601
Lantian County	11	2016	Xi’an City	14993	17.056	492519	14993	17.056	492519
Lantian County	11	2017	Xi’an City	39248	6.46785	539025	39248	6.46785	539025
Lantian County	11	2018	Xi’an City	39125	4.35407	494077	39125	4.35407	494077
Lantian County	11	2019	Xi’an City	38997	4.386	517089	38997	4.386	517089
Lantian County	11	2020	Xi’an City	.	.	.	38869	4.41794	540101
Lantian County	11	2021	Xi’an City	.	.	.	38741	4.44987	563113
Zhouzhi County	12	2012	Xi’an City	33257	7.31148	412820	33257	7.31148	412820
Zhouzhi County	12	2013	Xi’an City	33263	6.93563	460093	33263	6.93563	460093
Zhouzhi County	12	2014	Xi’an City	33269	6.7617	482477	33269	6.7617	482477
Zhouzhi County	12	2015	Xi’an City	32957	7.0308	508904	32957	7.0308	508904
Zhouzhi County	12	2016	Xi’an City	39473	5.63917	572627	39473	5.63917	572627
Zhouzhi County	12	2017	Xi’an City	32840	6.28977	591455	32840	6.28977	591455
Zhouzhi County	12	2018	Xi’an City	32723	3.63949	589596	32723	3.63949	589596
Zhouzhi County	12	2019	Xi’an City	32625	3.68448	646428	32625	3.68448	646428
Zhouzhi County	12	2020	Xi’an City	.	.	.	32527	3.72946	703260
Zhouzhi County	12	2021	Xi’an City	.	.	.	32429	3.77445	760092
Yanliang District	13	2012	Xi’an City	15792	5.14932	290460	15792	5.14932	290460
Yanliang District	13	2013	Xi’an City	15696	5.4389	324413	15696	5.4389	324413
Yanliang District	13	2014	Xi’an City	15632	5.18187	354330	15632	5.18187	354330
Yanliang District	13	2015	Xi’an City	15478	5.69912	368854	15478	5.69912	368854
Yanliang District	13	2016	Xi’an City	15457	5.61493	381618	15457	5.61493	381618
Yanliang District	13	2017	Xi’an City	15285	5.54962	412635	15285	5.54962	412635
Yanliang District	13	2018	Xi’an City	15136	7.94635	446310	15136	7.94635	446310
Yanliang District	13	2019	Xi’an City	15178	7.57504	487524	15178	7.57504	487524
Yanliang District	13	2020	Xi’an City	.	.	.	15220	7.20373	528738
Yanliang District	13	2021	Xi’an City	.	.	.	15262	6.83242	569952
Wangyi District	14	2012	Tongchuan City	3891	2.89283	17870	3891	2.89283	17870
Wangyi District	14	2013	Tongchuan City	3938	2.58558	19950	3938	2.58558	19950
Wangyi District	14	2014	Tongchuan City	3977	2.50616	21575	3977	2.50616	21575
Wangyi District	14	2015	Tongchuan City	3988	2.64769	22263	3988	2.64769	22263
Wangyi District	14	2016	Tongchuan City	5333	1.91918	23179	5333	1.91918	23179
Wangyi District	14	2017	Tongchuan City	5327	1.94537	23925	5327	1.94537	23925
Wangyi District	14	2018	Tongchuan City	5300	1.78811	22949	5300	1.78811	22949
Wangyi District	14	2019	Tongchuan City	5285	1.60889	25777	5285	1.60889	25777
Wangyi District	14	2020	Tongchuan City	.	.	.	5270	1.42967	28605
Wangyi District	14	2021	Tongchuan City	.	.	.	5255	1.25045	31433
Yintai District	15	2012	Tongchuan City	8924	4.30861	74923	8924	4.30861	74923
Yintai District	15	2013	Tongchuan City	9269	4.03075	84041	9269	4.03075	84041
Yintai District	15	2014	Tongchuan City	9208	3.91953	90846	9208	3.91953	90846
Yintai District	15	2015	Tongchuan City	9223	3.86978	92086	9223	3.86978	92086
Yintai District	15	2016	Tongchuan City	9333	3.8785	96681	9333	3.8785	96681
Yintai District	15	2017	Tongchuan City	9550	3.77864	98900	9550	3.77864	98900
Yintai District	15	2018	Tongchuan City	9435	4.21876	70674	9435	4.21876	70674
Yintai District	15	2019	Tongchuan City	9456	4.0827	76753	9456	4.0827	76753
Yintai District	15	2020	Tongchuan City	.	.	.	9477	3.94664	82832
Yintai District	15	2021	Tongchuan City	.	.	.	9498	3.81058	88911
Yaozhou District	16	2012	Tongchuan City	32624	2.58708	160530	32624	2.58708	160530
Yaozhou District	16	2013	Tongchuan City	32335	2.59221	179850	32335	2.59221	179850
Yaozhou District	16	2014	Tongchuan City	32154	2.80982	194054	32154	2.80982	194054
Yaozhou District	16	2015	Tongchuan City	32040	2.74516	196590	32040	2.74516	196590
Yaozhou District	16	2016	Tongchuan City	31815	2.80522	206613	31815	2.80522	206613
Yaozhou District	16	2017	Tongchuan City	31644	2.8436	212775	31644	2.8436	212775
Yaozhou District	16	2018	Tongchuan City	31690	2.50066	245015	31690	2.50066	245015
Yaozhou District	16	2019	Tongchuan City	28415	2.57128	225379	28415	2.57128	225379
Yaozhou District	16	2020	Tongchuan City	.	.	.	25140	2.6419	205743
Yaozhou District	16	2021	Tongchuan City	.	.	.	21865	2.71252	186107
Yijun County	17	2012	Tongchuan City	19134	5.09282	92575	19134	5.09282	92575
Yijun County	17	2013	Tongchuan City	19132	5.20829	103544	19132	5.20829	103544
Yijun County	17	2014	Tongchuan City	19302	5.05316	112333	19302	5.05316	112333
Yijun County	17	2015	Tongchuan City	19451	5.18133	111304	19451	5.18133	111304
Yijun County	17	2016	Tongchuan City	20681	5.04608	116691	20681	5.04608	116691
Yijun County	17	2017	Tongchuan City	21987	4.84004	119934	21987	4.84004	119934
Yijun County	17	2018	Tongchuan City	22987	6.92861	109518	22987	6.92861	109518
Yijun County	17	2019	Tongchuan City	25137	6.45324	115138	25137	6.45324	115138
Yijun County	17	2020	Tongchuan City	.	.	.	27287	5.97786	120758
Yijun County	17	2021	Tongchuan City	.	.	.	29437	5.50249	126378
Weibin District	18	2012	Baoji City	6504	4.07857	63308	6504	4.07857	63308
Weibin District	18	2013	Baoji City	6389	3.44342	69557	6389	3.44342	69557
Weibin District	18	2014	Baoji City	5969	3.35064	74374	5969	3.35065	74374
Weibin District	18	2015	Baoji City	5934	3.35288	77360	5934	3.35288	77360
Weibin District	18	2016	Baoji City	5565	2.85103	77834	5565	2.85103	77834
Weibin District	18	2017	Baoji City	5427	2.48977	80909	5427	2.48977	80909
Weibin District	18	2018	Baoji City	5104	2.30956	79619	5104	2.30956	79619
Weibin District	18	2019	Baoji City	5080	1.9935	86124	5080	1.9935	86124
Weibin District	18	2020	Baoji City	.	.	.	5056	1.67745	92629
Weibin District	18	2021	Baoji City	.	.	.	5032	1.36139	99134
Jintai District	19	2012	Baoji City	10748	3.42268	37857	10748	3.42268	37857
Jintai District	19	2013	Baoji City	10613	3.21436	41236	10613	3.21436	41236
Jintai District	19	2014	Baoji City	10176	3.24479	43570	10176	3.24479	43570
Jintai District	19	2015	Baoji City	10122	3.64217	45197	10122	3.64217	45197
Jintai District	19	2016	Baoji City	10199	3.48966	47906	10199	3.48966	47906
Jintai District	19	2017	Baoji City	10127	3.45611	48336	10127	3.45611	48336
Jintai District	19	2018	Baoji City	10065	3.80219	43330	10065	3.80219	43330
Jintai District	19	2019	Baoji City	9903	3.60456	46448	9903	3.60456	46448
Jintai District	19	2020	Baoji City	.	.	.	9741	3.40694	49566
Jintai District	19	2021	Baoji City	.	.	.	9579	3.20932	52684
Chencang District	20	2012	Baoji City	45170	5.32566	369445	45170	5.32566	369445
Chencang District	20	2013	Baoji City	45084	5.1255	403722	45084	5.1255	403722
Chencang District	20	2014	Baoji City	44968	4.99911	419956	44968	4.99911	419956
Chencang District	20	2015	Baoji City	44983	5.18796	431498	44983	5.18796	431498
Chencang District	20	2016	Baoji City	44600	5.08294	449627	44600	5.08294	449627
Chencang District	20	2017	Baoji City	44450	5.0425	456435	44450	5.0425	456435
Chencang District	20	2018	Baoji City	44321	4.45103	400193	44321	4.45103	400193
Chencang District	20	2019	Baoji City	43576	4.65926	449269	43576	4.65926	449269
Chencang District	20	2020	Baoji City	.	.	.	42831	4.8675	498345
Chencang District	20	2021	Baoji City	.	.	.	42086	5.07573	547421
Fengxiang County	21	2012	Baoji City	46181	5.8554	338535	46181	5.8554	338535
Fengxiang County	21	2013	Baoji City	46335	5.61234	371181	46335	5.61234	371181
Fengxiang County	21	2014	Baoji City	46332	5.53296	398017	46332	5.53296	398017
Fengxiang County	21	2015	Baoji City	45813	5.76336	406835	45813	5.76336	406835
Fengxiang County	21	2016	Baoji City	45724	5.60841	421979	45724	5.60841	421979
Fengxiang County	21	2017	Baoji City	45587	5.55312	432245	45587	5.55312	432245
Fengxiang County	21	2018	Baoji City	45903	5.59475	402375	45903	5.59475	402375
Fengxiang County	21	2019	Baoji City	45659	5.58503	438770	45659	5.58503	438770
Fengxiang County	21	2020	Baoji City	.	.	.	45415	5.57531	475165
Fengxiang County	21	2021	Baoji City	.	.	.	45171	5.56559	511560
Qishan County	22	2012	Baoji City	35237	7.80711	323161	35237	7.80711	323161
Qishan County	22	2013	Baoji City	35237	7.52221	351924	35237	7.52221	351924
Qishan County	22	2014	Baoji City	35237	7.54272	375889	35237	7.54272	375889
Qishan County	22	2015	Baoji City	35248	7.66137	384523	35248	7.66137	384523
Qishan County	22	2016	Baoji City	35289	7.43314	396887	35289	7.43314	396887
Qishan County	22	2017	Baoji City	35286	7.33007	408461	35286	7.33007	408461
Qishan County	22	2018	Baoji City	35284	6.41214	390555	35284	6.41214	390555
Qishan County	22	2019	Baoji City	35283	6.34368	422256	35283	6.34368	422256
Qishan County	22	2020	Baoji City	.	.	.	35282	6.27522	453957
Qishan County	22	2021	Baoji City	.	.	.	35281	6.20675	485658
Fufeng County	23	2012	Baoji City	33199	8.44983	299723	33199	8.44983	299723
Fufeng County	23	2013	Baoji City	32715	8.34632	329922	32715	8.34632	329922
Fufeng County	23	2014	Baoji City	32395	8.19614	350702	32395	8.19614	350702
Fufeng County	23	2015	Baoji City	31802	8.83271	361807	31802	8.83271	361807
Fufeng County	23	2016	Baoji City	31177	8.75498	374923	31177	8.75498	374923
Fufeng County	23	2017	Baoji City	30838	8.74126	383283	30838	8.74126	383283
Fufeng County	23	2018	Baoji City	30611	8.40714	361095	30611	8.40714	361095
Fufeng County	23	2019	Baoji City	30548	8.38575	379270	30548	8.38575	379270
Fufeng County	23	2020	Baoji City	.	.	.	30485	8.36437	397445
Fufeng County	23	2021	Baoji City	.	.	.	30422	8.34298	415620
Mei County	24	2012	Baoji City	23157	5.79466	290770	23157	5.79466	290770
Mei County	24	2013	Baoji City	23188	5.43514	331773	23188	5.43514	331773
Mei County	24	2014	Baoji City	23161	5.44765	363300	23161	5.44765	363300
Mei County	24	2015	Baoji City	23236	5.30573	375668	23236	5.30573	375668
Mei County	24	2016	Baoji City	23175	5.07387	386713	23175	5.07387	386713
Mei County	24	2017	Baoji City	23173	5.00941	390844	23173	5.00941	390844
Mei County	24	2018	Baoji City	23171	3.12895	382767	23171	3.12895	382767
Mei County	24	2019	Baoji City	23121	3.16716	415091	23121	3.16716	415091
Mei County	24	2020	Baoji City	.	.	.	23071	3.20537	447415
Mei County	24	2021	Baoji City	.	.	.	23021	3.24358	479739
Long County	25	2012	Baoji City	35436	3.12685	266633	35436	3.12685	266633
Long County	25	2013	Baoji City	35479	2.84709	286761	35479	2.84709	286761
Long County	25	2014	Baoji City	35442	2.82436	305299	35442	2.82436	305299
Long County	25	2015	Baoji City	35413	2.97151	313671	35413	2.97151	313671
Long County	25	2016	Baoji City	35368	2.92112	328986	35368	2.92112	328986
Long County	25	2017	Baoji City	35360	2.82805	346775	35360	2.82805	346775
Long County	25	2018	Baoji City	35341	2.93348	316174	35341	2.93348	316174
Long County	25	2019	Baoji City	35322	2.95272	343972	35322	2.95272	343972
Long County	25	2020	Baoji City	.	.	.	35303	2.97196	371770
Long County	25	2021	Baoji City	.	.	.	35284	2.99121	399568
Qianyang County	26	2012	Baoji City	18574	3.29924	140736	18574	3.29924	140736
Qianyang County	26	2013	Baoji City	18567	2.9651	154688	18567	2.9651	154688
Qianyang County	26	2014	Baoji City	18552	3.03455	160611	18552	3.03455	160611
Qianyang County	26	2015	Baoji City	18599	3.16727	168664	18599	3.16727	168664
Qianyang County	26	2016	Baoji City	18677	3.03619	181288	18677	3.03619	181288
Qianyang County	26	2017	Baoji City	18637	2.95235	184024	18637	2.95235	184024
Qianyang County	26	2018	Baoji City	18584	3.09164	164953	18584	3.09164	164953
Qianyang County	26	2019	Baoji City	18186	3.14412	186395	18186	3.14412	186395
Qianyang County	26	2020	Baoji City	.	.	.	17788	3.19661	207837
Qianyang County	26	2021	Baoji City	.	.	.	17390	3.24909	229279
Linyou County	27	2012	Baoji City	29530	2.14304	95471	29530	2.14304	95471
Linyou County	27	2013	Baoji City	30252	1.99114	102609	30252	1.99114	102609
Linyou County	27	2014	Baoji City	30045	2.20756	107561	30045	2.20756	107561
Linyou County	27	2015	Baoji City	30057	2.4214	111414	30057	2.4214	111414
Linyou County	27	2016	Baoji City	30057	2.61363	117637	30057	2.61363	117637
Linyou County	27	2017	Baoji City	29546	2.49736	120994	29546	2.49736	120994
Linyou County	27	2018	Baoji City	29464	2.49535	109008	29464	2.49535	109008
Linyou County	27	2019	Baoji City	29205	2.54696	131245	29205	2.54696	131245
Linyou County	27	2020	Baoji City	.	.	.	28946	2.59857	153482
Linyou County	27	2021	Baoji City	.	.	.	28687	2.65018	175719
Feng County	28	2012	Baoji City	9714	2.95594	98099	9714	2.95594	98099
Feng County	28	2013	Baoji City	9645	2.28357	111174	9645	2.28357	111174
Feng County	28	2014	Baoji City	9624	2.32637	118555	9624	2.32637	118555
Feng County	28	2015	Baoji City	9631	2.45426	123185	9631	2.45426	123185
Feng County	28	2016	Baoji City	9620	2.42017	128764	9620	2.42017	128764
Feng County	28	2017	Baoji City	9585	2.39958	132856	9585	2.39958	132856
Feng County	28	2018	Baoji City	9439	2.52442	127889	9439	2.52442	127889
Feng County	28	2019	Baoji City	9368	2.5538	149771	9368	2.5538	149771
Feng County	28	2020	Baoji City	.	.	.	9297	2.58318	171653
Feng County	28	2021	Baoji City	.	.	.	9226	2.61256	193535
Taibai County	29	2012	Baoji City	6513	1.12559	76011	6513	1.12559	76011
Taibai County	29	2013	Baoji City	6482	0.982721	85366	6482	0.982721	85366
Taibai County	29	2014	Baoji City	6460	0.991486	91208	6460	0.991486	91208
Taibai County	29	2015	Baoji City	6475	1.17251	99085	6475	1.17251	99085
Taibai County	29	2016	Baoji City	6498	1.13573	102951	6498	1.13573	102951
Taibai County	29	2017	Baoji City	6470	1.09104	113296	6470	1.09104	113296
Taibai County	29	2018	Baoji City	6475	1.03799	114573	6475	1.03799	114573
Taibai County	29	2019	Baoji City	6465	1.04501	127614	6465	1.04501	127614
Taibai County	29	2020	Baoji City	.	.	.	6455	1.05203	140655
Taibai County	29	2021	Baoji City	.	.	.	6445	1.05905	153696
Qindu District	30	2012	Xianyang City	10335	6.81064	238008	10335	6.81064	238008
Qindu District	30	2013	Xianyang City	9962	6.30094	270448	9962	6.30094	270448
Qindu District	30	2014	Xianyang City	8891	6.62715	285600	8891	6.62715	285600
Qindu District	30	2015	Xianyang City	8524	7.04024	299386	8524	7.04024	299386
Qindu District	30	2016	Xianyang City	8524	6.58353	316937	8524	6.58353	316937
Qindu District	30	2017	Xianyang City	3573	8.41198	131851	3573	8.41198	131851
Qindu District	30	2018	Xianyang City	3611	6.87732	130344	3611	6.87732	130344
Qindu District	30	2019	Xianyang City	3555	6.96259	134540	3555	6.96259	134540
Qindu District	30	2020	Xianyang City	.	.	.	3499	7.04786	138736
Qindu District	30	2021	Xianyang City	.	.	.	3443	7.13313	142932
Weicheng District	31	2012	Xianyang City	13124	8.19826	200596	13124	8.19826	200596
Weicheng District	31	2013	Xianyang City	12660	7.68065	223316	12660	7.68065	223316
Weicheng District	31	2014	Xianyang City	12421	7.48426	232705	12421	7.48426	232705
Weicheng District	31	2015	Xianyang City	12100	7.8443	240934	12100	7.8443	240934
Weicheng District	31	2016	Xianyang City	11964	7.43405	249961	11964	7.43405	249961
Weicheng District	31	2017	Xianyang City	.	.	.	11828	7.02381	258988
Weicheng District	31	2018	Xianyang City	.	.	.	11692	6.61356	268015
Weicheng District	31	2019	Xianyang City	.	.	.	11556	6.20332	277042
Weicheng District	31	2020	Xianyang City	.	.	.	11420	5.79307	286069
Weicheng District	31	2021	Xianyang City	.	.	.	11284	5.38283	295096
Sanyuan County	32	2012	Xianyang City	33208	6.2185	450714	33208	6.2185	450714
Sanyuan County	32	2013	Xianyang City	33129	6.03704	488895	33129	6.03704	488895
Sanyuan County	32	2014	Xianyang City	33055	5.90304	509048	33055	5.90304	509048
Sanyuan County	32	2015	Xianyang City	32980	6.09797	514073	32980	6.09797	514073
Sanyuan County	32	2016	Xianyang City	32902	5.95739	530811	32902	5.95739	530811
Sanyuan County	32	2017	Xianyang City	32836	5.93803	541711	32836	5.93803	541711
Sanyuan County	32	2018	Xianyang City	32751	5.76825	473577	32751	5.76825	473577
Sanyuan County	32	2019	Xianyang City	32730	5.75982	512923	32730	5.75982	512923
Sanyuan County	32	2020	Xianyang City	.	.	.	32709	5.75139	552269
Sanyuan County	32	2021	Xianyang City	.	.	.	32688	5.74297	591615
Jingyang County	33	2012	Xianyang City	44397	5.79478	632757	44397	5.79478	632757
Jingyang County	33	2013	Xianyang City	43757	5.54069	701427	43757	5.54069	701427
Jingyang County	33	2014	Xianyang City	43100	5.56471	737796	43100	5.56471	737796
Jingyang County	33	2015	Xianyang City	42459	5.82237	756662	42459	5.82237	756662
Jingyang County	33	2016	Xianyang City	41995	5.73394	791330	41995	5.73394	791330
Jingyang County	33	2017	Xianyang City	30607	5.33283	528502	30607	5.33283	528502
Jingyang County	33	2018	Xianyang City	30807	5.22657	476980	30807	5.22657	476980
Jingyang County	33	2019	Xianyang City	30807	5.22797	507076	30807	5.22797	507076
Jingyang County	33	2020	Xianyang City	.	.	.	30807	5.22936	537172
Jingyang County	33	2021	Xianyang City	.	.	.	30807	5.23076	567268
Qian County	34	2012	Xianyang City	51258	5.23233	426941	51258	5.23233	426941
Qian County	34	2013	Xianyang City	49915	5.07064	465953	49915	5.07064	465953
Qian County	34	2014	Xianyang City	48443	5.51322	513509	48443	5.51322	513509
Qian County	34	2015	Xianyang City	46630	5.63794	535346	46630	5.63794	535346
Qian County	34	2016	Xianyang City	46642	5.48679	556117	46642	5.48679	556117
Qian County	34	2017	Xianyang City	46959	5.35823	564452	46959	5.35823	564452
Qian County	34	2018	Xianyang City	46917	5.42405	504717	46917	5.42405	504717
Qian County	34	2019	Xianyang City	47064	5.30582	525600	47064	5.30582	525600
Qian County	34	2020	Xianyang City	.	.	.	47211	5.18759	546483
Qian County	34	2021	Xianyang City	.	.	.	47358	5.06936	567366
Liquan County	35	2012	Xianyang City	30850	4.16483	665289	30850	4.16483	665289
Liquan County	35	2013	Xianyang City	30033	4.09926	729211	30033	4.09926	729211
Liquan County	35	2014	Xianyang City	28865	4.1587	781606	28865	4.1587	781606
Liquan County	35	2015	Xianyang City	28876	4.33363	796999	28876	4.33363	796999
Liquan County	35	2016	Xianyang City	28874	4.20496	851118	28874	4.20496	851118
Liquan County	35	2017	Xianyang City	28866	4.16261	887487	28866	4.16261	887487
Liquan County	35	2018	Xianyang City	28841	4.01716	762998	28841	4.01716	762998
Liquan County	35	2019	Xianyang City	28823	3.89557	812990	28823	3.89557	812990
Liquan County	35	2020	Xianyang City	.	.	.	28805	3.77398	862982
Liquan County	35	2021	Xianyang City	.	.	.	28787	3.65238	912974
Yongshou County	36	2012	Xianyang City	19256	4.40045	195466	19256	4.40045	195466
Yongshou County	36	2013	Xianyang City	19553	4.19373	250900	19553	4.19373	250900
Yongshou County	36	2014	Xianyang City	20402	3.97108	273123	20402	3.97108	273123
Yongshou County	36	2015	Xianyang City	20405	4.36501	292511	20405	4.36501	292511
Yongshou County	36	2016	Xianyang City	20472	4.27926	312678	20472	4.27926	312678
Yongshou County	36	2017	Xianyang City	20538	4.22125	329220	20538	4.22125	329220
Yongshou County	36	2018	Xianyang City	20546	4.12182	355747	20546	4.12182	355747
Yongshou County	36	2019	Xianyang City	20555	3.92323	378301	20555	3.92323	378301
Yongshou County	36	2020	Xianyang City	.	.	.	20564	3.72464	400855
Yongshou County	36	2021	Xianyang City	.	.	.	20573	3.52604	423409
Changwu County	37	2012	Xianyang City	11058	5.66694	208938	11058	5.66694	208938
Changwu County	37	2013	Xianyang City	11223	5.25002	233416	11223	5.25002	233416
Changwu County	37	2014	Xianyang City	11666	4.72956	292219	11666	4.72956	292219
Changwu County	37	2015	Xianyang City	11708	5.01076	307462	11708	5.01076	307462
Changwu County	37	2016	Xianyang City	11775	4.65333	319740	11775	4.65333	319740
Changwu County	37	2017	Xianyang City	11831	4.75581	353680	11831	4.75581	353680
Changwu County	37	2018	Xianyang City	11909	4.67453	308384	11909	4.67453	308384
Changwu County	37	2019	Xianyang City	12021	4.51551	343442	12021	4.51551	343442
Changwu County	37	2020	Xianyang City	.	.	.	12133	4.3565	378500
Changwu County	37	2021	Xianyang City	.	.	.	12245	4.19748	413558
Xunyi County	38	2012	Xianyang City	27766	4.5644	386944	27766	4.5644	386944
Xunyi County	38	2013	Xianyang City	27767	4.28289	434653	27767	4.28289	434653
Xunyi County	38	2014	Xianyang City	27678	3.90303	486744	27678	3.90303	486744
Xunyi County	38	2015	Xianyang City	27752	4.05459	512243	27752	4.05459	512243
Xunyi County	38	2016	Xianyang City	27816	3.9547	526502	27816	3.9547	526502
Xunyi County	38	2017	Xianyang City	27786	3.80483	542244	27786	3.80483	542244
Xunyi County	38	2018	Xianyang City	27786	3.79036	480119	27786	3.79036	480119
Xunyi County	38	2019	Xianyang City	27786	4.46239	502679	27786	4.46239	502679
Xunyi County	38	2020	Xianyang City	.	.	.	27786	5.13442	525239
Xunyi County	38	2021	Xianyang City	.	.	.	27786	5.80645	547799
Chunhua County	39	2012	Xianyang City	25432	4.88731	376957	25432	4.88731	376957
Chunhua County	39	2013	Xianyang City	26034	4.4382	417469	26034	4.4382	417469
Chunhua County	39	2014	Xianyang City	27330	4.02488	456662	27330	4.02488	456662
Chunhua County	39	2015	Xianyang City	28754	4.10527	460098	28754	4.10527	460098
Chunhua County	39	2016	Xianyang City	28756	4.02382	480087	28756	4.02382	480087
Chunhua County	39	2017	Xianyang City	28762	3.94534	506629	28762	3.94534	506629
Chunhua County	39	2018	Xianyang City	28670	3.92794	454796	28670	3.92794	454796
Chunhua County	39	2019	Xianyang City	28698	3.7957	487215	28698	3.7957	487215
Chunhua County	39	2020	Xianyang City	.	.	.	28726	3.66346	519634
Chunhua County	39	2021	Xianyang City	.	.	.	28754	3.53122	552053
Wugong County	40	2012	Xianyang City	26528	7.93735	293249	26528	7.93735	293249
Wugong County	40	2013	Xianyang City	26767	7.47189	323023	26767	7.47189	323023
Wugong County	40	2014	Xianyang City	26906	7.33004	348078	26906	7.33004	348078
Wugong County	40	2015	Xianyang City	26937	7.54145	362655	26937	7.54145	362655
Wugong County	40	2016	Xianyang City	26955	7.34569	385201	26955	7.34569	385201
Wugong County	40	2017	Xianyang City	26967	7.20106	407256	26967	7.20106	407256
Wugong County	40	2018	Xianyang City	26978	7.22051	361151	26978	7.22051	361151
Wugong County	40	2019	Xianyang City	27590	7.17104	391253	27590	7.17104	391253
Wugong County	40	2020	Xianyang City	.	.	.	28202	7.12157	421355
Wugong County	40	2021	Xianyang City	.	.	.	28814	7.07209	451457
Xingping City	41	2012	Xianyang City	35810	6.22611	325470	35810	6.22611	325470
Xingping City	41	2013	Xianyang City	34875	6.36568	362534	34875	6.36568	362534
Xingping City	41	2014	Xianyang City	33924	6.3965	384997	33924	6.3965	384997
Xingping City	41	2015	Xianyang City	32687	6.85321	388869	32687	6.85321	388869
Xingping City	41	2016	Xianyang City	31490	6.9275	415054	31490	6.9275	415054
Xingping City	41	2017	Xianyang City	28145	6.91672	394385	28145	6.91672	394385
Xingping City	41	2018	Xianyang City	28031	6.65934	326852	28031	6.65934	326852
Xingping City	41	2019	Xianyang City	27957	6.77583	364691	27957	6.77583	364691
Xingping City	41	2020	Xianyang City	.	.	.	27883	6.89233	402530
Xingping City	41	2021	Xianyang City	.	.	.	27809	7.00882	440369
Binzhou City	42	2012	Xianyang City	30551	4.25462	252341	30551	4.25462	252341
Binzhou City	42	2013	Xianyang City	31169	3.79499	277029	31169	3.79499	277029
Binzhou City	42	2014	Xianyang City	31283	3.6867	297830	31283	3.6867	297830
Binzhou City	42	2015	Xianyang City	31430	3.99688	307949	31430	3.99688	307949
Binzhou City	42	2016	Xianyang City	31583	3.89605	318129	31583	3.89605	318129
Binzhou City	42	2017	Xianyang City	31755	3.82485	338547	31755	3.82485	338547
Binzhou City	42	2018	Xianyang City	31930	3.65615	326564	31930	3.65615	326564
Binzhou City	42	2019	Xianyang City	32049	3.48785	354735	32049	3.48785	354735
Binzhou City	42	2020	Xianyang City	.	.	.	32168	3.31954	382906
Binzhou City	42	2021	Xianyang City	.	.	.	32287	3.15123	411077
Linwei District	43	2012	Weinan City	69495	5.28875	527055	69495	5.28875	527055
Linwei District	43	2013	Weinan City	69522	4.85715	590453	69522	4.85715	590453
Linwei District	43	2014	Weinan City	65963	5.04956	630349	65963	5.04956	630349
Linwei District	43	2015	Weinan City	65683	5.3206	653461	65683	5.3206	653461
Linwei District	43	2016	Weinan City	63547	5.38238	687069	63547	5.38238	687069
Linwei District	43	2017	Weinan City	61591	5.55781	704352	61591	5.55781	704352
Linwei District	43	2018	Weinan City	59444	6.12319	846456	59444	6.12319	846456
Linwei District	43	2019	Weinan City	52668	5.64747	850412	52668	5.64747	850412
Linwei District	43	2020	Weinan City	.	.	.	45892	5.17175	854368
Linwei District	43	2021	Weinan City	.	.	.	39116	4.69603	858324
Huazhou District	44	2012	Weinan City	23958	4.99048	138149	23958	4.99048	138149
Huazhou District	44	2013	Weinan City	23922	4.69442	155283	23922	4.69442	155283
Huazhou District	44	2014	Weinan City	23922	4.60254	166851	23922	4.60254	166851
Huazhou District	44	2015	Weinan City	23952	4.91145	171806	23952	4.91145	171806
Huazhou District	44	2016	Weinan City	23746	4.82502	179231	23746	4.82502	179231
Huazhou District	44	2017	Weinan City	23632	4.82431	184469	23632	4.82431	184469
Huazhou District	44	2018	Weinan City	23590	5.79483	227018	23590	5.79483	227018
Huazhou District	44	2019	Weinan City	23608	5.91901	251489	23608	5.91901	251489
Huazhou District	44	2020	Weinan City	.	.	.	23626	6.04319	275960
Huazhou District	44	2021	Weinan City	.	.	.	23644	6.16737	300431
Tongguan County	45	2012	Weinan City	10654	4.36277	52526	10654	4.36277	52526
Tongguan County	45	2013	Weinan City	10720	4.02052	60204	10720	4.02052	60204
Tongguan County	45	2014	Weinan City	10661	3.84664	64299	10661	3.84664	64299
Tongguan County	45	2015	Weinan City	10593	4.28009	66261	10593	4.28009	66261
Tongguan County	45	2016	Weinan City	10660	4.13124	69086	10660	4.13124	69086
Tongguan County	45	2017	Weinan City	10703	4.11623	71616	10703	4.11623	71616
Tongguan County	45	2018	Weinan City	10720	4.1347	87342	10720	4.1347	87342
Tongguan County	45	2019	Weinan City	10710	3.95546	96342	10710	3.95546	96342
Tongguan County	45	2020	Weinan City	.	.	.	10700	3.77622	105342
Tongguan County	45	2021	Weinan City	.	.	.	10690	3.59698	114342
Dali County	46	2012	Weinan City	76399	3.79784	483972	76399	3.79784	483972
Dali County	46	2013	Weinan City	75705	3.67347	543715	75705	3.67347	543715
Dali County	46	2014	Weinan City	74380	3.6372	584115	74380	3.6372	584115
Dali County	46	2015	Weinan City	74031	3.82433	597803	74031	3.82433	597803
Dali County	46	2016	Weinan City	70692	3.89785	630040	70692	3.89785	630040
Dali County	46	2017	Weinan City	67571	4.12439	648934	67571	4.12439	648934
Dali County	46	2018	Weinan City	66876	4.43789	772302	66876	4.43788	772302
Dali County	46	2019	Weinan City	64259	4.77458	859041	64259	4.77458	859041
Dali County	46	2020	Weinan City	.	.	.	61642	5.11128	945780
Dali County	46	2021	Weinan City	.	.	.	59025	5.44798	1032519
Heyang County	47	2012	Weinan City	58383	3.7713	274949	58383	3.7713	274949
Heyang County	47	2013	Weinan City	58628	3.53074	310376	58628	3.53074	310376
Heyang County	47	2014	Weinan City	58395	3.37995	332370	58395	3.37995	332370
Heyang County	47	2015	Weinan City	58535	3.5236	344712	58535	3.5236	344712
Heyang County	47	2016	Weinan City	58324	3.48212	363275	58324	3.48212	363275
Heyang County	47	2017	Weinan City	58406	3.49344	374359	58406	3.49344	374359
Heyang County	47	2018	Weinan City	58580	3.75084	456674	58580	3.75084	456674
Heyang County	47	2019	Weinan City	58402	3.93463	509299	58402	3.93463	509299
Heyang County	47	2020	Weinan City	.	.	.	58224	4.11841	561924
Heyang County	47	2021	Weinan City	.	.	.	58046	4.3022	614549
Chengcheng County	48	2012	Weinan City	45504	3.90416	311150	45504	3.90416	311150
Chengcheng County	48	2013	Weinan City	46307	3.78129	343357	46307	3.78129	343357
Chengcheng County	48	2014	Weinan City	46925	3.56535	368722	46925	3.56535	368722
Chengcheng County	48	2015	Weinan City	46655	3.82726	380550	46655	3.82726	380550
Chengcheng County	48	2016	Weinan City	46884	3.74441	402459	46884	3.74441	402459
Chengcheng County	48	2017	Weinan City	47193	3.65474	412496	47193	3.65474	412496
Chengcheng County	48	2018	Weinan City	48127	3.76811	508307	48127	3.76811	508307
Chengcheng County	48	2019	Weinan City	47998	3.51513	564600	47998	3.51513	564600
Chengcheng County	48	2020	Weinan City	.	.	.	47869	3.26214	620893
Chengcheng County	48	2021	Weinan City	.	.	.	47740	3.00915	677186
Pucheng County	49	2012	Weinan City	97855	3.68153	363911	97855	3.68153	363911
Pucheng County	49	2013	Weinan City	94933	3.47716	411106	94933	3.47716	411106
Pucheng County	49	2014	Weinan City	93352	3.48506	440782	93352	3.48506	440782
Pucheng County	49	2015	Weinan City	91033	3.86853	455728	91033	3.86853	455728
Pucheng County	49	2016	Weinan City	88093	3.88443	479333	88093	3.88443	479333
Pucheng County	49	2017	Weinan City	88571	3.89952	493902	88571	3.89952	493902
Pucheng County	49	2018	Weinan City	88906	4.24998	590033	88906	4.24998	590033
Pucheng County	49	2019	Weinan City	88717	4.23555	638098	88717	4.23555	638098
Pucheng County	49	2020	Weinan City	.	.	.	88528	4.22111	686163
Pucheng County	49	2021	Weinan City	.	.	.	88339	4.20667	734228
Baishui County	50	2012	Weinan City	28577	4.125	313727	28577	4.125	313727
Baishui County	50	2013	Weinan City	28704	3.85866	359886	28704	3.85866	359886
Baishui County	50	2014	Weinan City	28718	3.66349	398236	28718	3.66349	398236
Baishui County	50	2015	Weinan City	28735	3.88457	414710	28735	3.88457	414710
Baishui County	50	2016	Weinan City	26165	4.16855	437159	26165	4.16855	437159
Baishui County	50	2017	Weinan City	26387	4.13097	450236	26387	4.13097	450236
Baishui County	50	2018	Weinan City	26112	3.92915	538547	26112	3.92915	538547
Baishui County	50	2019	Weinan City	25985	3.93227	580266	25985	3.93227	580266
Baishui County	50	2020	Weinan City	.	.	.	25858	3.93539	621985
Baishui County	50	2021	Weinan City	.	.	.	25731	3.9385	663704
Fuping County	51	2012	Weinan City	70987	5.35383	397056	70987	5.35383	397056
Fuping County	51	2013	Weinan City	71002	5.07036	445089	71002	5.07036	445089
Fuping County	51	2014	Weinan City	70814	5.01319	477479	70814	5.01319	477479
Fuping County	51	2015	Weinan City	70171	5.28218	494383	70171	5.28218	494383
Fuping County	51	2016	Weinan City	68101	5.28923	520442	68101	5.28923	520442
Fuping County	51	2017	Weinan City	66601	5.41079	532776	66601	5.41079	532776
Fuping County	51	2018	Weinan City	66597	5.67423	668497	66597	5.67423	668497
Fuping County	51	2019	Weinan City	66330	5.73353	741886	66330	5.73353	741886
Fuping County	51	2020	Weinan City	.	.	.	66063	5.79282	815275
Fuping County	51	2021	Weinan City	.	.	.	65796	5.85212	888664
Hancheng City	52	2012	Weinan City	26882	3.09754	231794	26882	3.09754	231794
Hancheng City	52	2013	Weinan City	27240	2.84875	258311	27240	2.84875	258311
Hancheng City	52	2014	Weinan City	25305	2.87651	276872	25305	2.87651	276872
Hancheng City	52	2015	Weinan City	23370	3.10552	287983	23370	3.10552	287983
Hancheng City	52	2016	Weinan City	24709	2.78121	305760	24709	2.78121	305760
Hancheng City	52	2017	Weinan City	24573	2.64868	315781	24573	2.64868	315781
Hancheng City	52	2018	Weinan City	24408	1.98865	420899	24408	1.98865	420899
Hancheng City	52	2019	Weinan City	24089	2.0445	456675	24089	2.0445	456675
Hancheng City	52	2020	Weinan City	.	.	.	23770	2.10035	492451
Hancheng City	52	2021	Weinan City	.	.	.	23451	2.1562	528227
Huayin City	53	2012	Weinan City	12758	6.3082	85727	12758	6.3082	85727
Huayin City	53	2013	Weinan City	12727	6.13656	97577	12727	6.13656	97577
Huayin City	53	2014	Weinan City	12703	5.90412	104549	12703	5.90412	104549
Huayin City	53	2015	Weinan City	12580	6.53227	107973	12580	6.53227	107973
Huayin City	53	2016	Weinan City	12557	6.25301	113091	12557	6.25301	113091
Huayin City	53	2017	Weinan City	12567	6.3662	116610	12567	6.3662	116610
Huayin City	53	2018	Weinan City	12569	8.74079	150071	12569	8.74079	150071
Huayin City	53	2019	Weinan City	12567	8.62091	164867	12567	8.62091	164867
Huayin City	53	2020	Weinan City	.	.	.	12565	8.50103	179663
Huayin City	53	2021	Weinan City	.	.	.	12563	8.38115	194459
Baota District	54	2012	Yan’an City	32450	2.7796	184619	32450	2.7796	184619
Baota District	54	2013	Yan’an City	32382	2.62563	198094	32382	2.62563	198094
Baota District	54	2014	Yan’an City	32431	2.77256	214744	32431	2.77256	214744
Baota District	54	2015	Yan’an City	32360	2.74774	202553	32360	2.74774	202553
Baota District	54	2016	Yan’an City	31201	2.88488	214136	31201	2.88488	214136
Baota District	54	2017	Yan’an City	31685	2.93069	221711	31685	2.93069	221711
Baota District	54	2018	Yan’an City	31435	2.30081	277751	31435	2.30081	277751
Baota District	54	2019	Yan’an City	31563	2.33226	296634	31563	2.33226	296634
Baota District	54	2020	Yan’an City	.	.	.	31691	2.3637	315517
Baota District	54	2021	Yan’an City	.	.	.	31819	2.39515	334400
Ansai District	55	2012	Yan’an City	27200	2.52088	113293	27200	2.52088	113293
Ansai District	55	2013	Yan’an City	27200	2.41496	125010	27200	2.41496	125010
Ansai District	55	2014	Yan’an City	27200	2.62831	131228	27200	2.62831	131228
Ansai District	55	2015	Yan’an City	27260	2.55029	131628	27260	2.55029	131628
Ansai District	55	2016	Yan’an City	27260	2.50341	147381	27260	2.50341	147381
Ansai District	55	2017	Yan’an City	37243	1.84045	158052	37243	1.84045	158052
Ansai District	55	2018	Yan’an City	39642	1.34416	220660	39642	1.34416	220660
Ansai District	55	2019	Yan’an City	39622	1.3624	232223	39622	1.3624	232223
Ansai District	55	2020	Yan’an City	.	.	.	39602	1.38064	243786
Ansai District	55	2021	Yan’an City	.	.	.	39582	1.39889	255349
Yanchang County	56	2012	Yan’an City	16510	2.32429	128152	16510	2.32429	128152
Yanchang County	56	2013	Yan’an City	16530	2.15354	141856	16530	2.15354	141856
Yanchang County	56	2014	Yan’an City	16570	2.41865	153645	16570	2.41865	153645
Yanchang County	56	2015	Yan’an City	16570	1.67966	152321	16570	1.67966	152321
Yanchang County	56	2016	Yan’an City	14867	1.81926	147698	14867	1.81926	147698
Yanchang County	56	2017	Yan’an City	14715	2.04057	150874	14715	2.04057	150874
Yanchang County	56	2018	Yan’an City	14648	1.47481	179965	14648	1.47481	179965
Yanchang County	56	2019	Yan’an City	14635	1.58463	185484	14635	1.58463	185484
Yanchang County	56	2020	Yan’an City	.	.	.	14622	1.69444	191003
Yanchang County	56	2021	Yan’an City	.	.	.	14609	1.80426	196522
Yanchuan County	57	2012	Yan’an City	24838	1.74181	83862	24838	1.74181	83862
Yanchuan County	57	2013	Yan’an City	24805	1.61476	97488	24805	1.61476	97488
Yanchuan County	57	2014	Yan’an City	24805	1.73425	109300	24805	1.73425	109300
Yanchuan County	57	2015	Yan’an City	24138	1.11016	118827	24138	1.11016	118827
Yanchuan County	57	2016	Yan’an City	23684	1.34129	133672	23684	1.34129	133672
Yanchuan County	57	2017	Yan’an City	22818	1.39276	136680	22818	1.39276	136680
Yanchuan County	57	2018	Yan’an City	23524	1.22921	163918	23524	1.22921	163918
Yanchuan County	57	2019	Yan’an City	23473	1.29336	169243	23473	1.29336	169243
Yanchuan County	57	2020	Yan’an City	.	.	.	23422	1.3575	174568
Yanchuan County	57	2021	Yan’an City	.	.	.	23371	1.42165	179893
Zichang City	58	2012	Yan’an City	30370	2.54392	114146	30370	2.54392	114146
Zichang City	58	2013	Yan’an City	30834	2.43319	125566	30834	2.43319	125566
Zichang City	58	2014	Yan’an City	31263	2.48399	128972	31263	2.48399	128972
Zichang City	58	2015	Yan’an City	31521	1.01037	115647	31521	1.01037	115647
Zichang City	58	2016	Yan’an City	31567	2.40077	128305	31567	2.40077	128305
Zichang City	58	2017	Yan’an City	31651	2.46924	128829	31651	2.46924	128829
Zichang City	58	2018	Yan’an City	32518	1.3062	124316	32518	1.3062	124316
Zichang City	58	2019	Yan’an City	32674	1.3182	127166	32674	1.3182	127166
Zichang City	58	2020	Yan’an City	.	.	.	32830	1.33021	130016
Zichang City	58	2021	Yan’an City	.	.	.	32986	1.34221	132866
Zhidan County	59	2012	Yan’an City	21200	2.60123	72235	21200	2.60123	72235
Zhidan County	59	2013	Yan’an City	21197	2.42747	80143	21197	2.42747	80143
Zhidan County	59	2014	Yan’an City	24417	2.17799	85421	24417	2.17799	85421
Zhidan County	59	2015	Yan’an City	27547	1.96116	93086	27547	1.96116	93086
Zhidan County	59	2016	Yan’an City	30187	1.87127	101813	30187	1.87127	101813
Zhidan County	59	2017	Yan’an City	30225	1.87173	101002	30225	1.87173	101002
Zhidan County	59	2018	Yan’an City	31381	2.25015	139237	31381	2.25015	139237
Zhidan County	59	2019	Yan’an City	31394	2.28028	139964	31394	2.28028	139964
Zhidan County	59	2020	Yan’an City	.	.	.	31407	2.3104	140691
Zhidan County	59	2021	Yan’an City	.	.	.	31420	2.34053	141418
Wuqi County	60	2012	Yan’an City	24520	2.39241	70880	24520	2.39241	70880
Wuqi County	60	2013	Yan’an City	24881	2.28054	79048	24881	2.28054	79048
Wuqi County	60	2014	Yan’an City	25066	2.47929	83532	25066	2.47929	83532
Wuqi County	60	2015	Yan’an City	25327	2.41106	87264	25327	2.41106	87264
Wuqi County	60	2016	Yan’an City	25320	2.46122	84473	25320	2.46122	84473
Wuqi County	60	2017	Yan’an City	25652	2.70466	86403	25652	2.70466	86403
Wuqi County	60	2018	Yan’an City	26340	2.61697	107332	26340	2.61697	107332
Wuqi County	60	2019	Yan’an City	26610	2.65351	111937	26610	2.65351	111937
Wuqi County	60	2020	Yan’an City	.	.	.	26880	2.69006	116542
Wuqi County	60	2021	Yan’an City	.	.	.	27150	2.7266	121147
Ganquan County	61	2012	Yan’an City	9586	4.33726	64988	9586	4.33726	64988
Ganquan County	61	2013	Yan’an City	9558	4.14281	73320	9558	4.14281	73320
Ganquan County	61	2014	Yan’an City	6110	6.94386	78243	6110	6.94386	78243
Ganquan County	61	2015	Yan’an City	6006	7.24093	79187	6006	7.24093	79187
Ganquan County	61	2016	Yan’an City	6023	8.29703	81123	6023	8.29703	81123
Ganquan County	61	2017	Yan’an City	6013	7.84633	83317	6013	7.84633	83317
Ganquan County	61	2018	Yan’an City	6012	7.42299	87686	6012	7.42299	87686
Ganquan County	61	2019	Yan’an City	6005	7.53872	91039	6005	7.53872	91039
Ganquan County	61	2020	Yan’an City	.	.	.	5998	7.65445	94392
Ganquan County	61	2021	Yan’an City	.	.	.	5991	7.77018	97745
Fu County	62	2012	Yan’an City	9847	3.78836	185474	9847	3.78836	185474
Fu County	62	2013	Yan’an City	9864	3.58769	208475	9864	3.58769	208475
Fu County	62	2014	Yan’an City	9864	3.54927	227397	9864	3.54927	227397
Fu County	62	2015	Yan’an City	9895	3.68125	217842	9895	3.68125	217842
Fu County	62	2016	Yan’an City	9999	3.64296	241647	9999	3.64296	241647
Fu County	62	2017	Yan’an City	10054	3.64124	249351	10054	3.64124	249351
Fu County	62	2018	Yan’an City	10054	3.2773	283096	10054	3.2773	283096
Fu County	62	2019	Yan’an City	10054	3.31112	296493	10054	3.31112	296493
Fu County	62	2020	Yan’an City	.	.	.	10054	3.34494	309890
Fu County	62	2021	Yan’an City	.	.	.	10054	3.37875	323287
Luochuan County	63	2012	Yan’an City	11237	8.40198	342897	11237	8.40198	342897
Luochuan County	63	2013	Yan’an City	10657	8.87116	375878	10657	8.87116	375878
Luochuan County	63	2014	Yan’an City	10471	9.48162	400197	10471	9.48162	400197
Luochuan County	63	2015	Yan’an City	10286	9.71087	360148	10286	9.71087	360148
Luochuan County	63	2016	Yan’an City	10138	10.4532	386336	10138	10.4532	386336
Luochuan County	63	2017	Yan’an City	9885	10.6335	387282	9885	10.6335	387282
Luochuan County	63	2018	Yan’an City	10195	10.4094	330942	10195	10.4094	330942
Luochuan County	63	2019	Yan’an City	10274	10.3488	432143	10274	10.3488	432143
Luochuan County	63	2020	Yan’an City	.	.	.	10353	10.2883	533344
Luochuan County	63	2021	Yan’an City	.	.	.	10432	10.2277	634545
Yichuan County	64	2012	Yan’an City	11854	3.12831	162137	11854	3.12831	162137
Yichuan County	64	2013	Yan’an City	11807	3.10104	181592	11807	3.10104	181592
Yichuan County	64	2014	Yan’an City	14851	2.50724	196008	14851	2.50724	196008
Yichuan County	64	2015	Yan’an City	14669	2.47611	197875	14669	2.47611	197875
Yichuan County	64	2016	Yan’an City	14683	2.38691	202531	14683	2.38691	202531
Yichuan County	64	2017	Yan’an City	14923	2.35991	203724	14923	2.35991	203724
Yichuan County	64	2018	Yan’an City	14923	1.82611	251732	14923	1.82611	251732
Yichuan County	64	2019	Yan’an City	14917	1.82892	255004	14917	1.82892	255004
Yichuan County	64	2020	Yan’an City	.	.	.	14911	1.83173	258276
Yichuan County	64	2021	Yan’an City	.	.	.	14905	1.83455	261548
Huanglong County	65	2012	Yan’an City	11865	6.52128	63990	11865	6.52128	63990
Huanglong County	65	2013	Yan’an City	11891	6.90615	69163	11891	6.90615	69163
Huanglong County	65	2014	Yan’an City	12050	7.14929	80656	12050	7.14929	80656
Huanglong County	65	2015	Yan’an City	11950	8.02661	82839	11950	8.02661	82839
Huanglong County	65	2016	Yan’an City	11756	7.70432	85086	11756	7.70432	85086
Huanglong County	65	2017	Yan’an City	11611	6.02015	87846	11611	6.02015	87846
Huanglong County	65	2018	Yan’an City	11460	6.38674	78888	11460	6.38674	78888
Huanglong County	65	2019	Yan’an City	11028	6.6644	100434	11028	6.6644	100434
Huanglong County	65	2020	Yan’an City	.	.	.	10596	6.94206	121980
Huanglong County	65	2021	Yan’an City	.	.	.	10164	7.21973	143526
Huangling County	66	2012	Yan’an City	8938	5.21548	110239	8938	5.21548	110239
Huangling County	66	2013	Yan’an City	8945	5.10207	122464	8945	5.10207	122464
Huangling County	66	2014	Yan’an City	9774	4.90475	142682	9774	4.90475	142682
Huangling County	66	2015	Yan’an City	9619	5.1994	137067	9619	5.1994	137067
Huangling County	66	2016	Yan’an City	9241	5.3518	143451	9241	5.3518	143451
Huangling County	66	2017	Yan’an City	8971	5.09999	145868	8971	5.09999	145868
Huangling County	66	2018	Yan’an City	9262	5.75351	165652	9262	5.75351	165652
Huangling County	66	2019	Yan’an City	9128	5.86985	172932	9128	5.86985	172932
Huangling County	66	2020	Yan’an City	.	.	.	8994	5.98619	180212
Huangling County	66	2021	Yan’an City	.	.	.	8860	6.10254	187492
Hantai District	67	2012	Hanzhong City	14923	6.93674	248738	14923	6.93674	248738
Hantai District	67	2013	Hanzhong City	14815	7.07695	276641	14815	7.07695	276641
Hantai District	67	2014	Hanzhong City	14773	7.03215	294765	14773	7.03215	294765
Hantai District	67	2015	Hanzhong City	14618	7.35956	306742	14618	7.35956	306742
Hantai District	67	2016	Hanzhong City	14064	7.6752	330189	14064	7.6752	330189
Hantai District	67	2017	Hanzhong City	13787	7.9839	336786	13787	7.9839	336786
Hantai District	67	2018	Hanzhong City	13740	8.24381	261343	13740	8.24381	261343
Hantai District	67	2019	Hanzhong City	13490	8.45137	287841	13490	8.45137	287841
Hantai District	67	2020	Hanzhong City	.	.	.	13240	8.65893	314339
Hantai District	67	2021	Hanzhong City	.	.	.	12990	8.86649	340837
Nanzheng District	68	2012	Hanzhong City	30224	4.87745	330886	30224	4.87745	330886
Nanzheng District	68	2013	Hanzhong City	30164	4.95011	367411	30164	4.95011	367411
Nanzheng District	68	2014	Hanzhong City	30446	4.8613	392411	30446	4.8613	392411
Nanzheng District	68	2015	Hanzhong City	29194	5.07478	412008	29194	5.07478	412008
Nanzheng District	68	2016	Hanzhong City	29198	5.0959	443339	29198	5.0959	443339
Nanzheng District	68	2017	Hanzhong City	34351	4.30346	449362	34351	4.30346	449362
Nanzheng District	68	2018	Hanzhong City	34783	4.4993	533661	34783	4.4993	533661
Nanzheng District	68	2019	Hanzhong City	36179	4.30178	590131	36179	4.30178	590131
Nanzheng District	68	2020	Hanzhong City	.	.	.	37575	4.10426	646601
Nanzheng District	68	2021	Hanzhong City	.	.	.	38971	3.90674	703071
Chenggu County	69	2012	Hanzhong City	24326	5.74805	612689	24326	5.74805	612689
Chenggu County	69	2013	Hanzhong City	24325	5.82134	679674	24325	5.82134	679674
Chenggu County	69	2014	Hanzhong City	24150	5.81064	726539	24150	5.81064	726539
Chenggu County	69	2015	Hanzhong City	24143	5.84091	748832	24143	5.84091	748832
Chenggu County	69	2016	Hanzhong City	23999	5.8902	800481	23999	5.8902	800481
Chenggu County	69	2017	Hanzhong City	23908	5.91656	819382	23908	5.91656	819382
Chenggu County	69	2018	Hanzhong City	23797	6.52565	760152	23797	6.52565	760152
Chenggu County	69	2019	Hanzhong City	23781	6.50822	834598	23781	6.50822	834598
Chenggu County	69	2020	Hanzhong City	.	.	.	23765	6.49079	909044
Chenggu County	69	2021	Hanzhong City	.	.	.	23749	6.47335	983490
Yang County	70	2012	Hanzhong City	27923	5.57454	322047	27923	5.57454	322047
Yang County	70	2013	Hanzhong City	27732	5.6839	356278	27732	5.6839	356278
Yang County	70	2014	Hanzhong City	27636	5.65219	380783	27636	5.65219	380783
Yang County	70	2015	Hanzhong City	27790	5.65185	398639	27790	5.65185	398639
Yang County	70	2016	Hanzhong City	27972	5.63968	427962	27972	5.63968	427962
Yang County	70	2017	Hanzhong City	28031	5.61004	436301	28031	5.61004	436301
Yang County	70	2018	Hanzhong City	27968	5.91151	507236	27968	5.91151	507236
Yang County	70	2019	Hanzhong City	27962	5.90244	559221	27962	5.90244	559221
Yang County	70	2020	Hanzhong City	.	.	.	27956	5.89337	611206
Yang County	70	2021	Hanzhong City	.	.	.	27950	5.88431	663191
Xixiang County	71	2012	Hanzhong City	21711	4.526	264662	21711	4.526	264662
Xixiang County	71	2013	Hanzhong City	21861	4.55258	294714	21861	4.55258	294714
Xixiang County	71	2014	Hanzhong City	21950	4.49522	313732	21950	4.49522	313732
Xixiang County	71	2015	Hanzhong City	21950	4.67112	330407	21950	4.67112	330407
Xixiang County	71	2016	Hanzhong City	21950	4.68579	356141	21950	4.68579	356141
Xixiang County	71	2017	Hanzhong City	21950	4.77103	362564	21950	4.77103	362564
Xixiang County	71	2018	Hanzhong City	22345	4.31345	372926	22345	4.31345	372926
Xixiang County	71	2019	Hanzhong City	22345	4.36433	417399	22345	4.36433	417399
Xixiang County	71	2020	Hanzhong City	.	.	.	22345	4.41522	461872
Xixiang County	71	2021	Hanzhong City	.	.	.	22345	4.4661	506345
Mian County	72	2012	Hanzhong City	26231	5.07011	304966	26231	5.07011	304966
Mian County	72	2013	Hanzhong City	26284	5.12464	338204	26284	5.12464	338204
Mian County	72	2014	Hanzhong City	26321	5.07249	359608	26321	5.07249	359608
Mian County	72	2015	Hanzhong City	26480	4.95359	377187	26480	4.95359	377187
Mian County	72	2016	Hanzhong City	26605	4.98113	405494	26605	4.98113	405494
Mian County	72	2017	Hanzhong City	28034	4.68931	410295	28034	4.68931	410295
Mian County	72	2018	Hanzhong City	28557	4.78405	377477	28557	4.78405	377477
Mian County	72	2019	Hanzhong City	28354	4.81484	418953	28354	4.81484	418953
Mian County	72	2020	Hanzhong City	.	.	.	28151	4.84564	460429
Mian County	72	2021	Hanzhong City	.	.	.	27948	4.87643	501905
Ningqiang County	73	2012	Hanzhong City	21256	3.86752	254727	21256	3.86752	254727
Ningqiang County	73	2013	Hanzhong City	21259	3.91622	283862	21259	3.91622	283862
Ningqiang County	73	2014	Hanzhong City	21263	3.88228	301567	21263	3.88228	301567
Ningqiang County	73	2015	Hanzhong City	21267	4.00776	315377	21267	4.00776	315377
Ningqiang County	73	2016	Hanzhong City	21249	4.03106	337556	21249	4.03106	337556
Ningqiang County	73	2017	Hanzhong City	21296	4.10448	343467	21296	4.10448	343467
Ningqiang County	73	2018	Hanzhong City	21164	3.63041	287797	21164	3.63041	287797
Ningqiang County	73	2019	Hanzhong City	21173	3.6923	319083	21173	3.6923	319083
Ningqiang County	73	2020	Hanzhong City	.	.	.	21182	3.75418	350369
Ningqiang County	73	2021	Hanzhong City	.	.	.	21191	3.81607	381655
Lueyang County	74	2012	Hanzhong City	10074	4.65942	131357	10074	4.65942	131357
Lueyang County	74	2013	Hanzhong City	10072	4.71922	145976	10072	4.71922	145976
Lueyang County	74	2014	Hanzhong City	10046	4.69032	155719	10046	4.69032	155719
Lueyang County	74	2015	Hanzhong City	10046	4.79474	162582	10046	4.79474	162582
Lueyang County	74	2016	Hanzhong City	10046	4.81993	173098	10046	4.81993	173098
Lueyang County	74	2017	Hanzhong City	10046	4.88792	177005	10046	4.88792	177005
Lueyang County	74	2018	Hanzhong City	10046	4.35825	149368	10046	4.35825	149368
Lueyang County	74	2019	Hanzhong City	10045	4.44241	166394	10045	4.44241	166394
Lueyang County	74	2020	Hanzhong City	.	.	.	10044	4.52657	183420
Lueyang County	74	2021	Hanzhong City	.	.	.	10043	4.61072	200446
Zhenba County	75	2012	Hanzhong City	23674	3.65452	215886	23674	3.65452	215886
Zhenba County	75	2013	Hanzhong City	23650	3.70499	240308	23650	3.70499	240308
Zhenba County	75	2014	Hanzhong City	23631	3.67589	257282	23631	3.67589	257282
Zhenba County	75	2015	Hanzhong City	23620	3.7898	268989	23620	3.7898	268989
Zhenba County	75	2016	Hanzhong City	23699	3.79683	287859	23699	3.79683	287859
Zhenba County	75	2017	Hanzhong City	23814	3.85849	295207	23814	3.85849	295207
Zhenba County	75	2018	Hanzhong City	24026	3.88679	299125	24026	3.88679	299125
Zhenba County	75	2019	Hanzhong City	24058	3.95781	331828	24058	3.95781	331828
Zhenba County	75	2020	Hanzhong City	.	.	.	24090	4.02883	364531
Zhenba County	75	2021	Hanzhong City	.	.	.	24122	4.09985	397234
Liuba County	76	2012	Hanzhong City	3086	3.80687	42369	3086	3.80687	42369
Liuba County	76	2013	Hanzhong City	3086	3.85515	47257	3086	3.85515	47257
Liuba County	76	2014	Hanzhong City	3066	3.81311	50856	3066	3.81311	50856
Liuba County	76	2015	Hanzhong City	3061	3.94381	52745	3061	3.94381	52745
Liuba County	76	2016	Hanzhong City	3131	3.86873	56014	3131	3.86873	56014
Liuba County	76	2017	Hanzhong City	3144	3.91953	57788	3144	3.91953	57788
Liuba County	76	2018	Hanzhong City	3118	3.11931	52872	3118	3.11931	52872
Liuba County	76	2019	Hanzhong City	3134	3.14901	58928	3134	3.14901	58928
Liuba County	76	2020	Hanzhong City	.	.	.	3150	3.17871	64984
Liuba County	76	2021	Hanzhong City	.	.	.	3166	3.20842	71040
Foping County	77	2012	Hanzhong City	1833	4.66448	18252	1833	4.66448	18252
Foping County	77	2013	Hanzhong City	1833	4.7234	20379	1833	4.7234	20379
Foping County	77	2014	Hanzhong City	1871	4.58632	21795	1871	4.58632	21795
Foping County	77	2015	Hanzhong City	1883	4.81306	23135	1883	4.81306	23135
Foping County	77	2016	Hanzhong City	1854	4.90777	24469	1854	4.90777	24469
Foping County	77	2017	Hanzhong City	1849	5.01028	25142	1849	5.01028	25142
Foping County	77	2018	Hanzhong City	1855	4.8814	30361	1855	4.8814	30361
Foping County	77	2019	Hanzhong City	1853	4.95737	33463	1853	4.95737	33463
Foping County	77	2020	Hanzhong City	.	.	.	1851	5.03333	36565
Foping County	77	2021	Hanzhong City	.	.	.	1849	5.1093	39667
Yuyang District	78	2012	Yulin City	53168	4.57173	359612	53168	4.57173	359612
Yuyang District	78	2013	Yulin City	63415	3.74303	395612	63415	3.74303	395612
Yuyang District	78	2014	Yulin City	65069	3.68284	430033	65069	3.68284	430033
Yuyang District	78	2015	Yulin City	63710	3.43579	444494	63710	3.43579	444494
Yuyang District	78	2016	Yulin City	77227	3.10433	503933	77227	3.10433	503933
Yuyang District	78	2017	Yulin City	82310	2.94178	512097	82310	2.94178	512097
Yuyang District	78	2018	Yulin City	82747	5.43153	648923	82747	5.43153	648923
Yuyang District	78	2019	Yulin City	84976	5.3157	714010	84976	5.3157	714010
Yuyang District	78	2020	Yulin City	.	.	.	87205	5.19987	779097
Yuyang District	78	2021	Yulin City	.	.	.	89434	5.08404	844184
Hengshan District	79	2012	Yulin City	59573	2.56395	205689	59573	2.56395	205689
Hengshan District	79	2013	Yulin City	60855	2.5755	232421	60855	2.5755	232421
Hengshan District	79	2014	Yulin City	60619	2.60658	246554	60619	2.60658	246554
Hengshan District	79	2015	Yulin City	60623	2.57328	248690	60623	2.57328	248690
Hengshan District	79	2016	Yulin City	65408	2.55327	111732	65408	2.55327	111732
Hengshan District	79	2017	Yulin City	81393	2.17393	286790	81393	2.17393	286790
Hengshan District	79	2018	Yulin City	81315	3.28128	422450	81315	3.28128	422450
Hengshan District	79	2019	Yulin City	81384	3.28439	474796	81384	3.28439	474796
Hengshan District	79	2020	Yulin City	.	.	.	81453	3.28751	527142
Hengshan District	79	2021	Yulin City	.	.	.	81522	3.29062	579488
Fugu County	80	2012	Yulin City	43260	1.58139	86360	43260	1.58139	86360
Fugu County	80	2013	Yulin City	43263	1.50651	92635	43263	1.50651	92635
Fugu County	80	2014	Yulin City	43263	1.55361	101206	43263	1.55361	101206
Fugu County	80	2015	Yulin City	43263	0.74863	100327	43263	0.74863	100327
Fugu County	80	2016	Yulin City	43263	1.34968	238197	43263	1.34968	238197
Fugu County	80	2017	Yulin City	43263	1.39891	117485	43263	1.39891	117485
Fugu County	80	2018	Yulin City	43263	1.60521	155654	43263	1.60521	155654
Fugu County	80	2019	Yulin City	43263	1.60537	168525	43263	1.60537	168525
Fugu County	80	2020	Yulin City	.	.	.	43263	1.60553	181396
Fugu County	80	2021	Yulin City	.	.	.	43263	1.60569	194267
Jingbian County	81	2012	Yulin City	80154	2.8659	284670	80154	2.89141	317568
Jingbian County	81	2013	Yulin City	80154	2.89141	317568	80154	2.96256	350910
Jingbian County	81	2014	Yulin City	80154	2.96256	350910	85194	2.52562	355569
Jingbian County	81	2015	Yulin City	85194	2.52562	355569	85751	2.74994	399931
Jingbian County	81	2016	Yulin City	85751	2.74994	399931	85785	2.97629	412931
Jingbian County	81	2017	Yulin City	85785	2.97629	412931	85800	3.83049	529672
Jingbian County	81	2018	Yulin City	85800	3.83049	529672	85834	3.72249	563266
Jingbian County	81	2019	Yulin City	85834	3.72249	563266	85868	3.61449	596860
Jingbian County	81	2020	Yulin City	.	.	.	85902	3.50648	630454
Jingbian County	81	2021	Yulin City	.	.	.	134162	2.1035	249735
Dingbian County	82	2012	Yulin City	134162	2.1035	249735	136878	2.14636	293266
Dingbian County	82	2013	Yulin City	136878	2.14636	293266	138925	2.14844	323520
Dingbian County	82	2014	Yulin City	138925	2.14844	323520	152968	1.76868	323223
Dingbian County	82	2015	Yulin City	152968	1.76868	323223	161502	1.84783	354825
Dingbian County	82	2016	Yulin City	161502	1.84783	354825	212526	1.37454	363114
Dingbian County	82	2017	Yulin City	212526	1.37454	363114	213526	1.75643	472420
Dingbian County	82	2018	Yulin City	213526	1.75643	472420	213526	1.75282	488718
Dingbian County	82	2019	Yulin City	213526	1.75282	488718	213526	1.74921	505016
Dingbian County	82	2020	Yulin City	.	.	.	213526	1.7456	521314
Dingbian County	82	2021	Yulin City	.	.	.	41557	2.11594	146772
Suide County	83	2012	Yulin City	41557	2.11594	146772	41727	2.09485	158733
Suide County	83	2013	Yulin City	41727	2.09485	158733	41741	2.15364	171872
Suide County	83	2014	Yulin City	41741	2.15364	171872	41741	2.01006	167692
Suide County	83	2015	Yulin City	41741	2.01006	167692	43083	2.11176	183963
Suide County	83	2016	Yulin City	43083	2.11176	183963	48323	1.96753	193974
Suide County	83	2017	Yulin City	48323	1.96753	193974	52394	4.64355	334733
Suide County	83	2018	Yulin City	52394	4.64355	334733	52405	4.65278	356059
Suide County	83	2019	Yulin City	52405	4.65278	356059	52416	4.66202	377385
Suide County	83	2020	Yulin City	.	.	.	52427	4.67125	398711
Suide County	83	2021	Yulin City	.	.	.	27859	2.99501	86083
Mizhi County	84	2012	Yulin City	27859	2.99501	86083	27859	3.06608	93653
Mizhi County	84	2013	Yulin City	27859	3.06608	93653	27865	3.16095	100865
Mizhi County	84	2014	Yulin City	27865	3.16095	100865	27865	3.13748	97077
Mizhi County	84	2015	Yulin City	27865	3.13748	97077	27866	3.59643	118896
Mizhi County	84	2016	Yulin City	27866	3.59643	118896	27870	3.81453	123884
Mizhi County	84	2017	Yulin City	27870	3.81453	123884	27870	4.80434	167591
Mizhi County	84	2018	Yulin City	27870	4.80434	167591	27870	4.80675	192511
Mizhi County	84	2019	Yulin City	27870	4.80675	192511	27870	4.80915	217431
Mizhi County	84	2020	Yulin City	.	.	.	27870	4.81155	242351
Mizhi County	84	2021	Yulin City	.	.	.	31225	2.26517	141701
Jia County	85	2012	Yulin City	31225	2.26517	141701	30838	2.35518	147758
Jia County	85	2013	Yulin City	30838	2.35518	147758	30844	2.48771	155538
Jia County	85	2014	Yulin City	30844	2.48771	155538	30844	2.44877	151820
Jia County	85	2015	Yulin City	30844	2.44877	151820	33590	2.28229	176965
Jia County	85	2016	Yulin City	33590	2.28229	176965	58808	1.4868	186577
Jia County	85	2017	Yulin City	58808	1.4868	186577	53404	3.70721	289748
Jia County	85	2018	Yulin City	53404	3.70721	289748	53405	3.71493	307097
Jia County	85	2019	Yulin City	53405	3.71493	307097	53406	3.72265	324446
Jia County	85	2020	Yulin City	.	.	.	53407	3.73037	341795
Jia County	85	2021	Yulin City	.	.	.	8120	2.18645	34621
Wubu County	86	2012	Yulin City	8120	2.18645	34621	8113	2.24664	36487
Wubu County	86	2013	Yulin City	8113	2.24664	36487	8101	2.32268	39133
Wubu County	86	2014	Yulin City	8101	2.32268	39133	8098	2.27958	38156
Wubu County	86	2015	Yulin City	8098	2.27958	38156	8092	2.83304	50695
Wubu County	86	2016	Yulin City	8092	2.83304	50695	8089	3.1868	53581
Wubu County	86	2017	Yulin City	8089	3.1868	53581	8077	6.87854	91282
Wubu County	86	2018	Yulin City	8077	6.87854	91282	8069	6.89292	102165
Wubu County	86	2019	Yulin City	8069	6.89292	102165	8061	6.9073	113048
Wubu County	86	2020	Yulin City	.	.	.	8053	6.92168	123931
Wubu County	86	2021	Yulin City	.	.	.	26647	2.69295	180483
Qingjian County	87	2012	Yulin City	26647	2.69295	180483	26820	2.71786	198024
Qingjian County	87	2013	Yulin City	26820	2.71786	198024	27078	2.77417	197172
Qingjian County	87	2014	Yulin City	27078	2.77417	197172	27079	3.11862	191669
Qingjian County	87	2015	Yulin City	27079	3.11862	191669	27099	2.92022	207813
Qingjian County	87	2016	Yulin City	27099	2.92022	207813	27319	3.04857	217007
Qingjian County	87	2017	Yulin City	27319	3.04857	217007	27364	3.98377	305699
Qingjian County	87	2018	Yulin City	27364	3.98377	305699	27365	3.99119	328863
Qingjian County	87	2019	Yulin City	27365	3.99119	328863	27366	3.99861	352027
Qingjian County	87	2020	Yulin City	.	.	.	27367	4.00603	375191
Qingjian County	87	2021	Yulin City	.	.	.	29748	3.73084	140797
Zizhou County	88	2012	Yulin City	29748	3.73084	140797	29789	3.4362	155906
Zizhou County	88	2013	Yulin City	29789	3.4362	155906	30484	3.47389	168958
Zizhou County	88	2014	Yulin City	30484	3.47389	168958	30440	2.31567	166563
Zizhou County	88	2015	Yulin City	30440	2.31567	166563	30594	3.3115	196008
Zizhou County	88	2016	Yulin City	30594	3.3115	196008	30473	3.41489	212211
Zizhou County	88	2017	Yulin City	30473	3.41489	212211	30628	6.00118	281097
Zizhou County	88	2018	Yulin City	30628	6.00118	281097	30628	5.80887	290372
Zizhou County	88	2019	Yulin City	30628	5.80887	290372	30628	5.61656	299647
Zizhou County	88	2020	Yulin City	.	.	.	30628	5.42425	308922
Zizhou County	88	2021	Yulin City	.	.	.	45155	2.6826	180649
Shenmu City	89	2012	Yulin City	45155	2.6826	180649	45155	2.74572	205324
Shenmu City	89	2013	Yulin City	45155	2.74572	205324	48474	2.56057	214584
Shenmu City	89	2014	Yulin City	48474	2.56057	214584	81855	1.49975	215555
Shenmu City	89	2015	Yulin City	81855	1.49975	215555	81990	1.52782	280183
Shenmu City	89	2016	Yulin City	81990	1.52782	280183	82142	1.5817	242464
Shenmu City	89	2017	Yulin City	82142	1.5817	242464	82279	3.02509	361933
Shenmu City	89	2018	Yulin City	82279	3.02509	361933	82850	3.06121	410931
Shenmu City	89	2019	Yulin City	82850	3.06121	410931	83421	3.09733	459929
Shenmu City	89	2020	Yulin City	.	.	.	83992	3.13345	508927
Shenmu City	89	2021	Yulin City	.	.	.	43255	5.02515	322257
Hanbin District	90	2012	Ankang City	43255	5.02515	322257	42932	5.09243	361282
Hanbin District	90	2013	Ankang City	42932	5.09243	361282	42740	5.01081	376875
Hanbin District	90	2014	Ankang City	42740	5.01081	376875	41938	5.10902	387029
Hanbin District	90	2015	Ankang City	41938	5.10902	387029	41582	5.17534	403961
Hanbin District	90	2016	Ankang City	41582	5.17534	403961	40841	5.21006	421483
Hanbin District	90	2017	Ankang City	40841	5.21006	421483	40706	4.58655	543078
Hanbin District	90	2018	Ankang City	40706	4.58655	543078	40566	4.67596	605722
Hanbin District	90	2019	Ankang City	40566	4.67596	605722	40426	4.76537	668366
Hanbin District	90	2020	Ankang City	.	.	.	40286	4.85479	731010
Hanbin District	90	2021	Ankang City	.	.	.	23285	4.29577	167092
Hanyin County	91	2012	Ankang City	23285	4.29577	167092	23269	4.40298	189776
Hanyin County	91	2013	Ankang City	23269	4.40298	189776	23041	4.48201	200726
Hanyin County	91	2014	Ankang City	23041	4.48201	200726	22947	4.41051	208869
Hanyin County	91	2015	Ankang City	22947	4.41051	208869	22901	4.4385	218373
Hanyin County	91	2016	Ankang City	22901	4.4385	218373	22919	4.38117	230978
Hanyin County	91	2017	Ankang City	22919	4.38117	230978	22811	4.22003	254803
Hanyin County	91	2018	Ankang City	22811	4.22003	254803	22630	4.34145	283381
Hanyin County	91	2019	Ankang City	22630	4.34145	283381	22449	4.46287	311959
Hanyin County	91	2020	Ankang City	.	.	.	22268	4.5843	340537
Hanyin County	91	2021	Ankang City	.	.	.	13086	5.07863	96428
Shiquan County	92	2012	Ankang City	13086	5.07863	96428	13099	5.11856	107031
Shiquan County	92	2013	Ankang City	13099	5.11856	107031	13100	5.10374	110801
Shiquan County	92	2014	Ankang City	13100	5.10374	110801	13111	5.33224	115214
Shiquan County	92	2015	Ankang City	13111	5.33224	115214	13118	5.3871	122292
Shiquan County	92	2016	Ankang City	13118	5.3871	122292	13129	5.42159	126860
Shiquan County	92	2017	Ankang City	13129	5.42159	126860	13094	4.67359	147740
Shiquan County	92	2018	Ankang City	13094	4.67359	147740	13141	4.76105	167163
Shiquan County	92	2019	Ankang City	13141	4.76105	167163	13188	4.84852	186586
Shiquan County	92	2020	Ankang City	.	.	.	13235	4.93598	206009
Shiquan County	92	2021	Ankang City	.	.	.	3386	5.86178	62968
Ningshan County	93	2012	Ankang City	3386	5.86178	62968	3390	5.88053	70647
Ningshan County	93	2013	Ankang City	3390	5.88053	70647	3392	5.66392	74604
Ningshan County	93	2014	Ankang City	3392	5.66392	74604	3403	5.70761	77333
Ningshan County	93	2015	Ankang City	3403	5.70761	77333	3404	5.76116	80355
Ningshan County	93	2016	Ankang City	3404	5.76116	80355	3404	5.77761	85387
Ningshan County	93	2017	Ankang City	3404	5.77761	85387	3404	3.56257	94280
Ningshan County	93	2018	Ankang City	3404	3.56257	94280	3414	3.63035	103156
Ningshan County	93	2019	Ankang City	3414	3.63035	103156	3424	3.69812	112032
Ningshan County	93	2020	Ankang City	.	.	.	3434	3.76589	120908
Ningshan County	93	2021	Ankang City	.	.	.	24386	4.38235	175284
Ziyang County	94	2012	Ankang City	24386	4.38235	175284	24370	4.44707	184765
Ziyang County	94	2013	Ankang City	24370	4.44707	184765	24249	4.4987	193078
Ziyang County	94	2014	Ankang City	24249	4.4987	193078	24259	4.58844	196564
Ziyang County	94	2015	Ankang City	24259	4.58844	196564	24255	4.59695	201530
Ziyang County	94	2016	Ankang City	24255	4.59695	201530	24036	4.67049	209496
Ziyang County	94	2017	Ankang City	24036	4.67049	209496	22691	4.53907	253083
Ziyang County	94	2018	Ankang City	22691	4.53907	253083	22578	4.65378	281583
Ziyang County	94	2019	Ankang City	22578	4.65378	281583	22465	4.76849	310083
Ziyang County	94	2020	Ankang City	.	.	.	22352	4.8832	338583
Ziyang County	94	2021	Ankang City	.	.	.	17168	3.72862	90850
Langao County	95	2012	Ankang City	17168	3.72862	90850	17184	3.79085	102303
Langao County	95	2013	Ankang City	17184	3.79085	102303	17180	3.81432	106117
Langao County	95	2014	Ankang City	17180	3.81432	106117	16807	4.00369	112891
Langao County	95	2015	Ankang City	16807	4.00369	112891	17050	3.9827	119031
Langao County	95	2016	Ankang City	17050	3.9827	119031	17057	4.02075	124159
Langao County	95	2017	Ankang City	17057	4.02075	124159	16806	2.46918	145256
Langao County	95	2018	Ankang City	16806	2.46918	145256	16811	2.51776	162530
Langao County	95	2019	Ankang City	16811	2.51776	162530	16816	2.56633	179804
Langao County	95	2020	Ankang City	.	.	.	16821	2.61491	197078
Langao County	95	2021	Ankang City	.	.	.	18379	4.00609	150436
Pingli County	96	2012	Ankang City	18379	4.00609	150436	18372	4.0301	169512
Pingli County	96	2013	Ankang City	18372	4.0301	169512	18332	4.04386	176836
Pingli County	96	2014	Ankang City	18332	4.04386	176836	18287	4.20506	183856
Pingli County	96	2015	Ankang City	18287	4.20506	183856	18152	4.27672	192619
Pingli County	96	2016	Ankang City	18152	4.27672	192619	18245	4.28605	200479
Pingli County	96	2017	Ankang City	18245	4.28605	200479	18216	3.10205	201731
Pingli County	96	2018	Ankang City	18216	3.10205	201731	18599	3.09726	224838
Pingli County	96	2019	Ankang City	18599	3.09726	224838	18982	3.09247	247945
Pingli County	96	2020	Ankang City	.	.	.	19365	3.08768	271052
Pingli County	96	2021	Ankang City	.	.	.	4943	5.49869	46773
Zhenping County	97	2012	Ankang City	4943	5.49869	46773	4948	5.53011	52640
Zhenping County	97	2013	Ankang City	4948	5.53011	52640	4966	5.44825	55179
Zhenping County	97	2014	Ankang City	4966	5.44825	55179	4965	5.54562	57384
Zhenping County	97	2015	Ankang City	4965	5.54562	57384	4981	5.59546	59927
Zhenping County	97	2016	Ankang City	4981	5.59546	59927	4933	5.66572	63301
Zhenping County	97	2017	Ankang City	4933	5.66572	63301	4926	4.27852	76017
Zhenping County	97	2018	Ankang City	4926	4.27852	76017	4955	4.3439	84561
Zhenping County	97	2019	Ankang City	4955	4.3439	84561	4984	4.40927	93105
Zhenping County	97	2020	Ankang City	.	.	.	5013	4.47464	101649
Zhenping County	97	2021	Ankang City	.	.	.	36208	3.3167	190068
Xunyang County	98	2012	Ankang City	36208	3.3167	190068	36361	3.37309	212778
Xunyang County	98	2013	Ankang City	36361	3.37309	212778	36410	3.39764	222456
Xunyang County	98	2014	Ankang City	36410	3.39764	222456	36542	3.43391	229561
Xunyang County	98	2015	Ankang City	36542	3.43391	229561	36650	3.44044	241290
Xunyang County	98	2016	Ankang City	36650	3.44044	241290	36659	3.44791	249653
Xunyang County	98	2017	Ankang City	36659	3.44791	249653	36600	3.15462	333308
Xunyang County	98	2018	Ankang City	36600	3.15462	333308	36772	3.20293	375542
Xunyang County	98	2019	Ankang City	36772	3.20293	375542	36944	3.25123	417776
Xunyang County	98	2020	Ankang City	.	.	.	37116	3.29954	460010
Xunyang County	98	2021	Ankang City	.	.	.	13840	4.0698	101752
Baihe County	99	2012	Ankang City	13840	4.0698	101752	13895	4.08104	115437
Baihe County	99	2013	Ankang City	13895	4.08104	115437	13885	4.13136	120819
Baihe County	99	2014	Ankang City	13885	4.13136	120819	14097	4.12712	126822
Baihe County	99	2015	Ankang City	14097	4.12712	126822	14097	4.14102	131233
Baihe County	99	2016	Ankang City	14097	4.14102	131233	14096	4.17849	136801
Baihe County	99	2017	Ankang City	14096	4.17849	136801	14097	4.02398	171639
Baihe County	99	2018	Ankang City	14097	4.02398	171639	14154	4.04472	190115
Baihe County	99	2019	Ankang City	14154	4.04472	190115	14211	4.06547	208591
Baihe County	99	2020	Ankang City	.	.	.	14268	4.08621	227067
Baihe County	99	2021	Ankang City	.	.	.	21578	4.9861	205123
Shangzhou District	100	2012	Shangluo City	21578	4.9861	205123	21378	5.05674	230111
Shangzhou District	100	2013	Shangluo City	21378	5.05674	230111	21230	3.82398	243724
Shangzhou District	100	2014	Shangluo City	21230	3.82398	243724	20972	4.98856	241200
Shangzhou District	100	2015	Shangluo City	20972	4.98856	241200	20967	5.02175	257463
Shangzhou District	100	2016	Shangluo City	20967	5.02175	257463	21112	4.63092	262074
Shangzhou District	100	2017	Shangluo City	21112	4.63092	262074	21344	4.23613	257676
Shangzhou District	100	2018	Shangluo City	21344	4.23613	257676	21448	4.26086	288665
Shangzhou District	100	2019	Shangluo City	21448	4.26086	288665	21552	4.28559	319654
Shangzhou District	100	2020	Shangluo City	.	.	.	21656	4.31033	350643
Shangzhou District	100	2021	Shangluo City	.	.	.	31457	5.19487	310000
Luonan County	101	2012	Shangluo City	31457	5.19487	310000	31671	5.30703	344618
Luonan County	101	2013	Shangluo City	31671	5.30703	344618	31794	4.4688	364527
Luonan County	101	2014	Shangluo City	31794	4.4688	364527	31892	5.09012	368882
Luonan County	101	2015	Shangluo City	31892	5.09012	368882	31974	5.14283	389686
Luonan County	101	2016	Shangluo City	31974	5.14283	389686	32018	4.99219	388553
Luonan County	101	2017	Shangluo City	32018	4.99219	388553	32140	3.85227	376736
Luonan County	101	2018	Shangluo City	32140	3.85227	376736	32260	3.74671	417801
Luonan County	101	2019	Shangluo City	32260	3.74671	417801	32380	3.64116	458866
Luonan County	101	2020	Shangluo City	.	.	.	32500	3.5356	499931
Luonan County	101	2021	Shangluo City	.	.	.	12307	5.2939	186654
Danfeng County	102	2012	Shangluo City	12307	5.2939	186654	12185	5.35938	199680
Danfeng County	102	2013	Shangluo City	12185	5.35938	199680	12163	4.20472	207058
Danfeng County	102	2014	Shangluo City	12163	4.20472	207058	12163	4.9445	209831
Danfeng County	102	2015	Shangluo City	12163	4.9445	209831	12090	5.05575	218054
Danfeng County	102	2016	Shangluo City	12090	5.05575	218054	12118	5.02616	222008
Danfeng County	102	2017	Shangluo City	12118	5.02616	222008	12059	4.509	212013
Danfeng County	102	2018	Shangluo City	12059	4.509	212013	12054	4.39514	230072
Danfeng County	102	2019	Shangluo City	12054	4.39514	230072	12049	4.28128	248131
Danfeng County	102	2020	Shangluo City	.	.	.	12044	4.16742	266190
Danfeng County	102	2021	Shangluo City	.	.	.	14201	4.34709	201808
Shangnan County	103	2012	Shangluo City	14201	4.34709	201808	14153	4.42026	217129
Shangnan County	103	2013	Shangluo City	14153	4.42026	217129	14138	3.48932	227986
Shangnan County	103	2014	Shangluo City	14138	3.48932	227986	14126	4.00241	226022
Shangnan County	103	2015	Shangluo City	14126	4.00241	226022	14038	4.0753	238841
Shangnan County	103	2016	Shangluo City	14038	4.0753	238841	14080	4.18594	247066
Shangnan County	103	2017	Shangluo City	14080	4.18594	247066	14123	2.06011	239508
Shangnan County	103	2018	Shangluo City	14123	2.06011	239508	14095	2.19099	255275
Shangnan County	103	2019	Shangluo City	14095	2.19099	255275	14067	2.32186	271042
Shangnan County	103	2020	Shangluo City	.	.	.	14039	2.45274	286809
Shangnan County	103	2021	Shangluo City	.	.	.	24006	4.61243	210779
Shanyang County	104	2012	Shangluo City	24006	4.61243	210779	24001	4.64468	250496
Shanyang County	104	2013	Shangluo City	24001	4.64468	250496	24003	3.61671	282881
Shanyang County	104	2014	Shangluo City	24003	3.61671	282881	23992	4.22495	300646
Shanyang County	104	2015	Shangluo City	23992	4.22495	300646	23975	4.27775	330490
Shanyang County	104	2016	Shangluo City	23975	4.27775	330490	23971	4.48196	333186
Shanyang County	104	2017	Shangluo City	23971	4.48196	333186	23964	3.57787	317819
Shanyang County	104	2018	Shangluo City	23964	3.57787	317819	23964	3.558	347520
Shanyang County	104	2019	Shangluo City	23964	3.558	347520	23964	3.53814	377221
Shanyang County	104	2020	Shangluo City	.	.	.	23964	3.51828	406922
Shanyang County	104	2021	Shangluo City	.	.	.	21569	4.28866	187819
Zhen’an County	105	2012	Shangluo City	21569	4.28866	187819	21559	4.31101	208394
Zhen’an County	105	2013	Shangluo City	21559	4.31101	208394	21586	3.50417	216494
Zhen’an County	105	2014	Shangluo City	21586	3.50417	216494	21961	3.94395	209866
Zhen’an County	105	2015	Shangluo City	21961	3.94395	209866	21899	4.00429	214784
Zhen’an County	105	2016	Shangluo City	21899	4.00429	214784	21746	4.10572	219282
Zhen’an County	105	2017	Shangluo City	21746	4.10572	219282	21667	3.38206	218244
Zhen’an County	105	2018	Shangluo City	21667	3.38206	218244	21441	3.30805	239912
Zhen’an County	105	2019	Shangluo City	21441	3.30805	239912	21215	3.23405	261580
Zhen’an County	105	2020	Shangluo City	.	.	.	20989	3.16005	283248
Zhen’an County	105	2021	Shangluo City	.	.	.	8481	4.93362	93320
Zhashui County	106	2012	Shangluo City	8481	4.93362	93320	8481	4.98208	109728
Zhashui County	106	2013	Shangluo City	8481	4.98208	109728	8481	4.22026	116521
Zhashui County	106	2014	Shangluo City	8481	4.22026	116521	8481	4.82797	126000
Zhashui County	106	2015	Shangluo City	8481	4.82797	126000	8667	4.78251	131341
Zhashui County	106	2016	Shangluo City	8667	4.78251	131341	8684	4.90108	139276
Zhashui County	106	2017	Shangluo City	8684	4.90108	139276	8691	5.04464	131526
Zhashui County	106	2018	Shangluo City	8691	5.04464	131526	8692	4.51312	151455
Zhashui County	106	2019	Shangluo City	8692	4.51312	151455	8693	3.98159	171384
Zhashui County	106	2020	Shangluo City	.	.	.	8694	3.45006	191313
Zhashui County	106	2021	Shangluo City	.	.	.

## Sheet: farmland quality (B2)
County/District	Year	City	Area occupied by facility agriculture(Hectare)	Machine harvesting area(Hectare)	Total power of agricultural machinery(Million watts)	b21x	b22x	b23x
Chang’an District	2012	Xi’an City	.	.	42	548	65234	42
Chang’an District	2013	Xi’an City	1077	65577	44	1077	65577	44
Chang’an District	2014	Xi’an City	1606	65920	43	1606	65920	43
Chang’an District	2015	Xi’an City	1794	61000	43	1794	61000	43
Chang’an District	2016	Xi’an City	2122	60486	44	2122	60486	44
Chang’an District	2017	Xi’an City	2122	60377	35	2122	60377	35
Chang’an District	2018	Xi’an City	242	.	35	242	60268	35
Chang’an District	2019	Xi’an City	291	.	36	291	60159	36
Chang’an District	2020	Xi’an City	931	.	.	931	60050	37
Chang’an District	2021	Xi’an City	933	.	.	933	59941	38
Baqiao District	2012	Xi’an City	.	.	18			18
Baqiao District	2013	Xi’an City	.	.	18			18
Baqiao District	2014	Xi’an City	.	.	18			18
Baqiao District	2015	Xi’an City	.	.	18			18
Baqiao District	2016	Xi’an City	.	.	15.0471			15.0471
Baqiao District	2017	Xi’an City	.	.	14			14
Baqiao District	2018	Xi’an City	.	.	13			13
Baqiao District	2019	Xi’an City	.	.	12			12
Baqiao District	2020	Xi’an City	.	.	11.89			11.89
Baqiao District	2021	Xi’an City	.	.	.			11.78
Yanta District	2012	Xi’an City	.	.	4.0174			4.0174
Yanta District	2013	Xi’an City	.	.	3.195			3.195
Yanta District	2014	Xi’an City	.	.	9.2415			9.2415
Yanta District	2015	Xi’an City	.	.	9.2155			9.2155
Yanta District	2016	Xi’an City	.	.	6.2016			6.2016
Yanta District	2017	Xi’an City	.	.	6.1955			6.1955
Yanta District	2018	Xi’an City	.	.	5.532			5.532
Yanta District	2019	Xi’an City	.	.	4.0174			4.0174
Yanta District	2020	Xi’an City	.	.	.			2.5028
Yanta District	2021	Xi’an City	.	.	.			0.988199
Weiyang District	2012	Xi’an City	.	.	5			5
Weiyang District	2013	Xi’an City	.	.	4			4
Weiyang District	2014	Xi’an City	.	.	5			5
Weiyang District	2015	Xi’an City	.	.	5			5
Weiyang District	2016	Xi’an City	.	.	5			5
Weiyang District	2017	Xi’an City	.	.	5			5
Weiyang District	2018	Xi’an City	.	.	4			4
Weiyang District	2019	Xi’an City	.	.	4			4
Weiyang District	2020	Xi’an City	.	.	.			4
Weiyang District	2021	Xi’an City	.	.	.			4
Beilin District	2012	Xi’an City	.	.	.
Beilin District	2013	Xi’an City	.	.	.
Beilin District	2014	Xi’an City	.	.	.
Beilin District	2015	Xi’an City	.	.	.
Beilin District	2016	Xi’an City	.	.	.
Beilin District	2017	Xi’an City	.	.	.
Beilin District	2018	Xi’an City	.	.	.
Beilin District	2019	Xi’an City	.	.	.
Beilin District	2020	Xi’an City	.	.	.
Beilin District	2021	Xi’an City	.	.	.
Xincheng District	2012	Xi’an City	.	.	.
Xincheng District	2013	Xi’an City	.	.	.
Xincheng District	2014	Xi’an City	.	.	.
Xincheng District	2015	Xi’an City	.	.	.
Xincheng District	2016	Xi’an City	.	.	.
Xincheng District	2017	Xi’an City	.	.	.
Xincheng District	2018	Xi’an City	.	.	.
Xincheng District	2019	Xi’an City	.	.	.
Xincheng District	2020	Xi’an City	.	.	.
Xincheng District	2021	Xi’an City	.	.	.
Lianhu District	2012	Xi’an City	.	.	.
Lianhu District	2013	Xi’an City	.	.	.
Lianhu District	2014	Xi’an City	.	.	.
Lianhu District	2015	Xi’an City	.	.	.
Lianhu District	2016	Xi’an City	.	.	.
Lianhu District	2017	Xi’an City	.	.	.
Lianhu District	2018	Xi’an City	.	.	.
Lianhu District	2019	Xi’an City	.	.	.
Lianhu District	2020	Xi’an City	.	.	.
Lianhu District	2021	Xi’an City	.	.	.
Lintong District	2012	Xi’an City	.	.	55.3638			55.3638
Lintong District	2013	Xi’an City	.	.	56.8816			56.8816
Lintong District	2014	Xi’an City	.	.	60.8868			60.8868
Lintong District	2015	Xi’an City	.	.	61.2966			61.2966
Lintong District	2016	Xi’an City	.	.	46.6695			46.6695
Lintong District	2017	Xi’an City	.	.	40.8257			40.8257
Lintong District	2018	Xi’an City	.	.	40.4008			40.4008
Lintong District	2019	Xi’an City	.	.	42.2225			42.2225
Lintong District	2020	Xi’an City	.	.	42.3218			42.3218
Lintong District	2021	Xi’an City	.	.	.			42.4211
Gaoling District	2012	Xi’an City	.	.	26	1195	24226	26
Gaoling District	2013	Xi’an City	1474	24932	27	1474	24932	27
Gaoling District	2014	Xi’an City	1753	25638	28	1753	25638	28
Gaoling District	2015	Xi’an City	1354	27193	29	1354	27193	29
Gaoling District	2016	Xi’an City	1854	26593	25	1854	26593	25
Gaoling District	2017	Xi’an City	1855	26340	21	1855	26340	21
Gaoling District	2018	Xi’an City	4800	.	22	4800	26087	22
Gaoling District	2019	Xi’an City	1874	.	23	1874	25834	23
Gaoling District	2020	Xi’an City	2808	.	.	2808	25581	24
Gaoling District	2021	Xi’an City	1525	.	.	1525	25328	25
Huyi District	2012	Xi’an City	.	.	43	1090	58650	43
Huyi District	2013	Xi’an City	1179	58666	46	1179	58666	46
Huyi District	2014	Xi’an City	1268	58682	50	1268	58682	50
Huyi District	2015	Xi’an City	1289	55666	50	1289	55666	50
Huyi District	2016	Xi’an City	1233	55728	21	1233	55728	21
Huyi District	2017	Xi’an City	1290	54599	49	1290	54599	49
Huyi District	2018	Xi’an City	1137	.	50	1137	53470	50
Huyi District	2019	Xi’an City	1002	.	50	1002	52341	50
Huyi District	2020	Xi’an City	1940	.	.	1940	51212	50
Huyi District	2021	Xi’an City	1990	.	.	1990	50083	50
Lantian County	2012	Xi’an City	.	.	29	14	25716	29
Lantian County	2013	Xi’an City	45	26133	30	45	26133	30
Lantian County	2014	Xi’an City	76	26550	31	76	26550	31
Lantian County	2015	Xi’an City	186	26560	31	186	26560	31
Lantian County	2016	Xi’an City	275	26750	34	275	26750	34
Lantian County	2017	Xi’an City	300	27485	25	300	27485	25
Lantian County	2018	Xi’an City	269	.	25	269	28220	25
Lantian County	2019	Xi’an City	3617	.	25	3617	28955	25
Lantian County	2020	Xi’an City	242	.	.	242	29690	25
Lantian County	2021	Xi’an City	800	.	.	800	30425	25
Zhouzhi County	2012	Xi’an City	.	.	42	156	22747	42
Zhouzhi County	2013	Xi’an City	228	30340	43	228	30340	43
Zhouzhi County	2014	Xi’an City	300	37933	45	300	37933	45
Zhouzhi County	2015	Xi’an City	140	37723	48	140	37723	48
Zhouzhi County	2016	Xi’an City	144	42140	48	144	42140	48
Zhouzhi County	2017	Xi’an City	166	36173	33	166	36173	33
Zhouzhi County	2018	Xi’an City	194	.	35	194	30206	35
Zhouzhi County	2019	Xi’an City	199	.	34	199	24239	34
Zhouzhi County	2020	Xi’an City	482	.	.	482	18272	33
Zhouzhi County	2021	Xi’an City	556	.	.	556	12305	32
Yanliang District	2012	Xi’an City	.	.	17			17
Yanliang District	2013	Xi’an City	.	.	19			19
Yanliang District	2014	Xi’an City	.	.	19			19
Yanliang District	2015	Xi’an City	.	.	19			19
Yanliang District	2016	Xi’an City	.	.	17			17
Yanliang District	2017	Xi’an City	.	.	16			16
Yanliang District	2018	Xi’an City	.	.	13			13
Yanliang District	2019	Xi’an City	.	.	11			11
Yanliang District	2020	Xi’an City	.	.	.			9
Yanliang District	2021	Xi’an City	.	.	.			7
Wangyi District	2012	Tongchuan City	.	.	6			6
Wangyi District	2013	Tongchuan City	.	.	7			7
Wangyi District	2014	Tongchuan City	.	.	7			7
Wangyi District	2015	Tongchuan City	.	.	7			7
Wangyi District	2016	Tongchuan City	.	.	4			4
Wangyi District	2017	Tongchuan City	.	.	3			3
Wangyi District	2018	Tongchuan City	.	.	3			3
Wangyi District	2019	Tongchuan City	.	.	3			3
Wangyi District	2020	Tongchuan City	.	.	.			3
Wangyi District	2021	Tongchuan City	.	.	.			3
Yintai District	2012	Tongchuan City	.	.	9			9
Yintai District	2013	Tongchuan City	.	.	11			11
Yintai District	2014	Tongchuan City	.	.	11			11
Yintai District	2015	Tongchuan City	.	.	12			12
Yintai District	2016	Tongchuan City	.	.	6			6
Yintai District	2017	Tongchuan City	.	.	6			6
Yintai District	2018	Tongchuan City	.	.	7			7
Yintai District	2019	Tongchuan City	.	.	7			7
Yintai District	2020	Tongchuan City	.	.	.			7
Yintai District	2021	Tongchuan City	.	.	.			7
Yaozhou District	2012	Tongchuan City	.	.	20	457	19111	20
Yaozhou District	2013	Tongchuan City	576	19499	22	576	19499	22
Yaozhou District	2014	Tongchuan City	695	19887	23	695	19887	23
Yaozhou District	2015	Tongchuan City	588	21021	24	588	21021	24
Yaozhou District	2016	Tongchuan City	245	21310	13	245	21310	13
Yaozhou District	2017	Tongchuan City	196	1600	14	196	1600	14
Yaozhou District	2018	Tongchuan City	196	.	13	196	-18110	13
Yaozhou District	2019	Tongchuan City	220	.	13	220	-37820	13
Yaozhou District	2020	Tongchuan City	225	.	.	225	-57530	13
Yaozhou District	2021	Tongchuan City	233	.	.	233	-77240	13
Yijun County	2012	Tongchuan City	.	.	9	86	5712	9
Yijun County	2013	Tongchuan City	84	7300	11	84	7300	11
Yijun County	2014	Tongchuan City	82	8888	12	82	8888	12
Yijun County	2015	Tongchuan City	95	8387	12	95	8387	12
Yijun County	2016	Tongchuan City	71	10370	9	71	10370	9
Yijun County	2017	Tongchuan City	69	10370	10	69	10370	10
Yijun County	2018	Tongchuan City	119	.	11	119	10370	11
Yijun County	2019	Tongchuan City	122	.	12	122	10370	12
Yijun County	2020	Tongchuan City	79	.	.	79	10370	13
Yijun County	2021	Tongchuan City	76	.	.	76	10370	14
Weibin District	2012	Baoji City	.	.	8			8
Weibin District	2013	Baoji City	.	.	8			8
Weibin District	2014	Baoji City	.	.	8			8
Weibin District	2015	Baoji City	.	.	7			7
Weibin District	2016	Baoji City	.	.	6			6
Weibin District	2017	Baoji City	.	.	6			6
Weibin District	2018	Baoji City	.	.	6			6
Weibin District	2019	Baoji City	.	.	6			6
Weibin District	2020	Baoji City	.	.	.			6
Weibin District	2021	Baoji City	.	.	.			6
Jintai District	2012	Baoji City	.	.	13			13
Jintai District	2013	Baoji City	.	.	14			14
Jintai District	2014	Baoji City	.	.	14			14
Jintai District	2015	Baoji City	.	.	14			14
Jintai District	2016	Baoji City	.	.	12			12
Jintai District	2017	Baoji City	.	.	13			13
Jintai District	2018	Baoji City	.	.	13			13
Jintai District	2019	Baoji City	.	.	13			13
Jintai District	2020	Baoji City	.	.	.			13
Jintai District	2021	Baoji City	.	.	.			13
Chencang District	2012	Baoji City	.	.	35	1642	32626	35
Chencang District	2013	Baoji City	1598	32713	37	1598	32713	37
Chencang District	2014	Baoji City	1554	32800	41	1554	32800	41
Chencang District	2015	Baoji City	1596	32900	43	1596	32900	43
Chencang District	2016	Baoji City	1915	33000	38	1915	33000	38
Chencang District	2017	Baoji City	968	34067	39	968	34067	39
Chencang District	2018	Baoji City	577	.	41	577	35134	41
Chencang District	2019	Baoji City	600	.	41	600	36201	41
Chencang District	2020	Baoji City	622	.	.	622	37268	41
Chencang District	2021	Baoji City	655	.	.	655	38335	41
Fengxiang County	2012	Baoji City	.	.	38	1438	42384	38
Fengxiang County	2013	Baoji City	1438	43407	41	1438	43407	41
Fengxiang County	2014	Baoji City	1438	44430	43	1438	44430	43
Fengxiang County	2015	Baoji City	1238	43330	44	1238	43330	44
Fengxiang County	2016	Baoji City	1162	39065	36	1162	39065	36
Fengxiang County	2017	Baoji City	1154	39066	37	1154	39066	37
Fengxiang County	2018	Baoji City	1330	.	37	1330	39067	37
Fengxiang County	2019	Baoji City	1072	.	6	1072	39068	6
Fengxiang County	2020	Baoji City	725	.	.	725	39069	-25
Fengxiang County	2021	Baoji City	664	.	.	664	39070	-56
Qishan County	2012	Baoji City	.	.	24	1597	42464	24
Qishan County	2013	Baoji City	1597	42472	26	1597	42472	26
Qishan County	2014	Baoji City	1597	42480	38	1597	42480	38
Qishan County	2015	Baoji City	1567	42350	37	1567	42350	37
Qishan County	2016	Baoji City	1413	42350	31	1413	42350	31
Qishan County	2017	Baoji City	1413	42350	34	1413	42350	34
Qishan County	2018	Baoji City	1124	.	34	1124	42350	34
Qishan County	2019	Baoji City	1192	.	38	1192	42350	38
Qishan County	2020	Baoji City	1354	.	.	1354	42350	42
Qishan County	2021	Baoji City	1354	.	.	1354	42350	46
Fufeng County	2012	Baoji City	.	.	40	29	20843	40
Fufeng County	2013	Baoji City	104	38521	42	104	38521	42
Fufeng County	2014	Baoji City	179	56199	43	179	56199	43
Fufeng County	2015	Baoji City	170	42487	44	170	42487	44
Fufeng County	2016	Baoji City	108	40333	36	108	40333	36
Fufeng County	2017	Baoji City	115	46400	42	115	46400	42
Fufeng County	2018	Baoji City	140	.	44	140	52467	44
Fufeng County	2019	Baoji City	208	.	35	208	58534	35
Fufeng County	2020	Baoji City	362	.	.	362	64601	26
Fufeng County	2021	Baoji City	291	.	.	291	70668	17
Mei County	2012	Baoji City	.	.	19	577	8566	19
Mei County	2013	Baoji City	583	15440	20	583	15440	20
Mei County	2014	Baoji City	589	22314	22	589	22314	22
Mei County	2015	Baoji City	590	25330	23	590	25330	23
Mei County	2016	Baoji City	612	25330	22	612	25330	22
Mei County	2017	Baoji City	616	25330	24	616	25330	24
Mei County	2018	Baoji City	236	.	25	236	25330	25
Mei County	2019	Baoji City	238	.	42	238	25330	42
Mei County	2020	Baoji City	288	.	.	288	25330	59
Mei County	2021	Baoji City	371	.	.	371	25330	76
Long County	2012	Baoji City	.	.	15	109	20135	15
Long County	2013	Baoji City	115	20258	16	115	20258	16
Long County	2014	Baoji City	121	20381	17	121	20381	17
Long County	2015	Baoji City	99	15087	18	99	15087	18
Long County	2016	Baoji City	138	16953	15	138	16953	15
Long County	2017	Baoji City	154	15680	18	154	15680	18
Long County	2018	Baoji City	78	.	18	78	14407	18
Long County	2019	Baoji City	198	.	25	198	13134	25
Long County	2020	Baoji City	198	.	.	198	11861	32
Long County	2021	Baoji City	198	.	.	198	10588	39
Qianyang County	2012	Baoji City	.	.	12	529	6902	12
Qianyang County	2013	Baoji City	591	8467	14	591	8467	14
Qianyang County	2014	Baoji City	653	10032	14	653	10032	14
Qianyang County	2015	Baoji City	653	8980	15	653	8980	15
Qianyang County	2016	Baoji City	653	8980	11	653	8980	11
Qianyang County	2017	Baoji City	663	9060	12	663	9060	12
Qianyang County	2018	Baoji City	691	.	12	691	9140	12
Qianyang County	2019	Baoji City	249	.	19	249	9220	19
Qianyang County	2020	Baoji City	231	.	.	231	9300	26
Qianyang County	2021	Baoji City	237	.	.	237	9380	33
Linyou County	2012	Baoji City	.	.	6	240	8471	6
Linyou County	2013	Baoji City	.	8383	7	210	8383	7
Linyou County	2014	Baoji City	180	8295	8	180	8295	8
Linyou County	2015	Baoji City	150	8102	8	150	8102	8
Linyou County	2016	Baoji City	150	7279	5	150	7279	5
Linyou County	2017	Baoji City	141	7619	5	141	7619	5
Linyou County	2018	Baoji City	23	.	5	23	7959	5
Linyou County	2019	Baoji City	76	.	12	76	8299	12
Linyou County	2020	Baoji City	69	.	.	69	8639	19
Linyou County	2021	Baoji City	76	.	.	76	8979	26
Feng County	2012	Baoji City	.	.	10	29	719	10
Feng County	2013	Baoji City	30	753	11	30	753	11
Feng County	2014	Baoji City	31	787	11	31	787	11
Feng County	2015	Baoji City	31	800	12	31	800	12
Feng County	2016	Baoji City	31	1200	6	31	1200	6
Feng County	2017	Baoji City	35	1617	6	35	1617	6
Feng County	2018	Baoji City	37	.	6	37	2034	6
Feng County	2019	Baoji City	30	.	5	30	2451	5
Feng County	2020	Baoji City	48	.	.	48	2868	4
Feng County	2021	Baoji City	53	.	.	53	3285	3
Taibai County	2012	Baoji City	.	.	6	9	282	6
Taibai County	2013	Baoji City	10	273	7	10	273	7
Taibai County	2014	Baoji City	11	264	7	11	264	7
Taibai County	2015	Baoji City	13	264	8	13	264	8
Taibai County	2016	Baoji City	13	264	6	13	264	6
Taibai County	2017	Baoji City	19	273	6	19	273	6
Taibai County	2018	Baoji City	.	.	6	76.5	282	6
Taibai County	2019	Baoji City	134	.	6	134	291	6
Taibai County	2020	Baoji City	134	.	.	134	300	6
Taibai County	2021	Baoji City	132	.	.	132	309	6
Qindu District	2012	Xianyang City	.	.	20			20
Qindu District	2013	Xianyang City	.	.	22			22
Qindu District	2014	Xianyang City	.	.	23			23
Qindu District	2015	Xianyang City	.	.	24			24
Qindu District	2016	Xianyang City	.	.	19			19
Qindu District	2017	Xianyang City	.	.	19			19
Qindu District	2018	Xianyang City	.	.	11			11
Qindu District	2019	Xianyang City	.	.	11			11
Qindu District	2020	Xianyang City	.	.	.			11
Qindu District	2021	Xianyang City	.	.	.			11
Weicheng District	2012	Xianyang City	.	.	19			19
Weicheng District	2013	Xianyang City	.	.	22			22
Weicheng District	2014	Xianyang City	.	.	23			23
Weicheng District	2015	Xianyang City	.	.	24			24
Weicheng District	2016	Xianyang City	.	.	14			14
Weicheng District	2017	Xianyang City	.	.	14			14
Weicheng District	2018	Xianyang City	.	.	.			14
Weicheng District	2019	Xianyang City	.	.	.			14
Weicheng District	2020	Xianyang City	.	.	.			14
Weicheng District	2021	Xianyang City	.	.	.			14
Sanyuan County	2012	Xianyang City	.	.	24	864	36099	24
Sanyuan County	2013	Xianyang City	884	38667	28	884	38667	28
Sanyuan County	2014	Xianyang City	904	41235	29	904	41235	29
Sanyuan County	2015	Xianyang City	1061	40023	31	1061	40023	31
Sanyuan County	2016	Xianyang City	1063	40036	23	1063	40036	23
Sanyuan County	2017	Xianyang City	1788	42958	25	1788	42958	25
Sanyuan County	2018	Xianyang City	8243	.	25	8243	45880	25
Sanyuan County	2019	Xianyang City	5476	.	25	5476	48802	25
Sanyuan County	2020	Xianyang City	5633	.	.	5633	51724	25
Sanyuan County	2021	Xianyang City	5859	.	.	5859	54646	25
Jingyang County	2012	Xianyang City	.	.	40	8814	52466	40
Jingyang County	2013	Xianyang City	9220	51088	46	9220	51088	46
Jingyang County	2014	Xianyang City	9626	49710	47	9626	49710	47
Jingyang County	2015	Xianyang City	9636	49812	49	9636	49812	49
Jingyang County	2016	Xianyang City	6768	49667	36	6768	49667	36
Jingyang County	2017	Xianyang City	2498	41867	39	2498	41867	39
Jingyang County	2018	Xianyang City	306	.	37	306	34067	37
Jingyang County	2019	Xianyang City	2394	.	38	2394	26267	38
Jingyang County	2020	Xianyang City	2542	.	.	2542	18467	39
Jingyang County	2021	Xianyang City	2585	.	.	2585	10667	40
Qian County	2012	Xianyang City	.	.	32	84	70400	32
Qian County	2013	Xianyang City	84	64200	37	84	64200	37
Qian County	2014	Xianyang City	84	58000	38	84	58000	38
Qian County	2015	Xianyang City	94	58036	39	94	58036	39
Qian County	2016	Xianyang City	113	60666	29	113	60666	29
Qian County	2017	Xianyang City	124	59203	29	124	59203	29
Qian County	2018	Xianyang City	271	.	29	271	57740	29
Qian County	2019	Xianyang City	95	.	30	95	56277	30
Qian County	2020	Xianyang City	103	.	.	103	54814	31
Qian County	2021	Xianyang City	126	.	.	126	53351	32
Liquan County	2012	Xianyang City	.	.	32	-32	16572	32
Liquan County	2013	Xianyang City	76	16579	38	76	16579	38
Liquan County	2014	Xianyang City	184	16586	39	184	16586	39
Liquan County	2015	Xianyang City	204	16572	40	204	16572	40
Liquan County	2016	Xianyang City	210	16583	19	210	16583	19
Liquan County	2017	Xianyang City	238	16425	20	238	16425	20
Liquan County	2018	Xianyang City	290	.	21	290	16267	21
Liquan County	2019	Xianyang City	466	.	21	466	16109	21
Liquan County	2020	Xianyang City	465	.	.	465	15951	21
Liquan County	2021	Xianyang City	658	.	.	658	15793	21
Yongshou County	2012	Xianyang City	.	.	14	4	15784	14
Yongshou County	2013	Xianyang City	4	15784	17	4	15784	17
Yongshou County	2014	Xianyang City	4	15784	18	4	15784	18
Yongshou County	2015	Xianyang City	4	15784	20	4	15784	20
Yongshou County	2016	Xianyang City	5	15283	17	5	15283	17
Yongshou County	2017	Xianyang City	5	15285	20	5	15285	20
Yongshou County	2018	Xianyang City	5	.	21	5	15287	21
Yongshou County	2019	Xianyang City	12	.	23	12	15289	23
Yongshou County	2020	Xianyang City	69	.	.	69	15291	25
Yongshou County	2021	Xianyang City	69	.	.	69	15293	27
Changwu County	2012	Xianyang City	.	.	12	58	7477	12
Changwu County	2013	Xianyang City	143	7405	13	143	7405	13
Changwu County	2014	Xianyang City	228	7333	14	228	7333	14
Changwu County	2015	Xianyang City	247	7415	15	247	7415	15
Changwu County	2016	Xianyang City	248	7320	14	248	7320	14
Changwu County	2017	Xianyang City	265	7510	13	265	7510	13
Changwu County	2018	Xianyang City	273	.	12	273	7700	12
Changwu County	2019	Xianyang City	87	.	17	87	7890	17
Changwu County	2020	Xianyang City	133	.	.	133	8080	22
Changwu County	2021	Xianyang City	100	.	.	100	8270	27
Xunyi County	2012	Xianyang City	.	.	10	80	16135	10
Xunyi County	2013	Xianyang City	72	15334	11	72	15334	11
Xunyi County	2014	Xianyang City	64	14533	12	64	14533	12
Xunyi County	2015	Xianyang City	64	14480	14	64	14480	14
Xunyi County	2016	Xianyang City	66	14480	10	66	14480	10
Xunyi County	2017	Xianyang City	69	14532	10	69	14532	10
Xunyi County	2018	Xianyang City	206	.	10	206	14584	10
Xunyi County	2019	Xianyang City	13	.	13	13	14636	13
Xunyi County	2020	Xianyang City	42	.	.	42	14688	16
Xunyi County	2021	Xianyang City	40	.	.	40	14740	19
Chunhua County	2012	Xianyang City	.	.	19	264	17416	19
Chunhua County	2013	Xianyang City	268	17516	23	268	17516	23
Chunhua County	2014	Xianyang City	272	17616	24	272	17616	24
Chunhua County	2015	Xianyang City	275	17968	25	275	17968	25
Chunhua County	2016	Xianyang City	280	17720	15	280	17720	15
Chunhua County	2017	Xianyang City	145	17333	15	145	17333	15
Chunhua County	2018	Xianyang City	534	.	16	534	16946	16
Chunhua County	2019	Xianyang City	409	.	11	409	16559	11
Chunhua County	2020	Xianyang City	439	.	.	439	16172	6
Chunhua County	2021	Xianyang City	620	.	.	620	15785	1
Wugong County	2012	Xianyang City	.	.	24	454	37095	24
Wugong County	2013	Xianyang City	446	38180	30	446	38180	30
Wugong County	2014	Xianyang City	438	39265	32	438	39265	32
Wugong County	2015	Xianyang City	436	39607	34	436	39607	34
Wugong County	2016	Xianyang City	437	39935	26	437	39935	26
Wugong County	2017	Xianyang City	438	39952	27	438	39952	27
Wugong County	2018	Xianyang City	653	.	28	653	39969	28
Wugong County	2019	Xianyang City	268	.	16	268	39986	16
Wugong County	2020	Xianyang City	310	.	.	310	40003	4
Wugong County	2021	Xianyang City	585	.	.	585	40020	-8
Xingping City	2012	Xianyang City	.	.	28	1914	37358	28
Xingping City	2013	Xianyang City	1889	37670	31	1889	37670	31
Xingping City	2014	Xianyang City	1864	37982	32	1864	37982	32
Xingping City	2015	Xianyang City	2106	37982	33	2106	37982	33
Xingping City	2016	Xianyang City	2118	38014	23	2118	38014	23
Xingping City	2017	Xianyang City	2119	35176	23	2119	35176	23
Xingping City	2018	Xianyang City	1968	.	20	1968	32338	20
Xingping City	2019	Xianyang City	1763	.	30	1763	29500	30
Xingping City	2020	Xianyang City	1883	.	.	1883	26662	40
Xingping City	2021	Xianyang City	2027	.	.	2027	23824	50
Binzhou City	2012	Xianyang City	.	.	10	168	16383	10
Binzhou City	2013	Xianyang City	175	17974	11	175	17974	11
Binzhou City	2014	Xianyang City	182	19565	13	182	19565	13
Binzhou City	2015	Xianyang City	198	19585	14	198	19585	14
Binzhou City	2016	Xianyang City	199	19626	14	199	19626	14
Binzhou City	2017	Xianyang City	207	19846	15	207	19846	15
Binzhou City	2018	Xianyang City	208	.	16	208	20066	16
Binzhou City	2019	Xianyang City	215	.	21	215	20286	21
Binzhou City	2020	Xianyang City	220	.	.	220	20506	26
Binzhou City	2021	Xianyang City	220	.	.	220	20726	31
Linwei District	2012	Weinan City	.	.	76			76
Linwei District	2013	Weinan City	.	.	75			75
Linwei District	2014	Weinan City	.	.	81			81
Linwei District	2015	Weinan City	.	.	95			95
Linwei District	2016	Weinan City	.	.	88			88
Linwei District	2017	Weinan City	.	.	101			101
Linwei District	2018	Weinan City	.	.	114			114
Linwei District	2019	Weinan City	.	.	91			91
Linwei District	2020	Weinan City	.	.	.			68
Linwei District	2021	Weinan City	.	.	.			45
Huazhou District	2012	Weinan City	.	.	27	2757	14200	27
Huazhou District	2013	Weinan City	2783	21800	30	2783	21800	30
Huazhou District	2014	Weinan City	2809	29400	33	2809	29400	33
Huazhou District	2015	Weinan City	2809	29400	35	2809	29400	35
Huazhou District	2016	Weinan City	2802	29400	33	2802	29400	33
Huazhou District	2017	Weinan City	2824	27333	30	2824	27333	30
Huazhou District	2018	Weinan City	2826	.	31	2826	25266	31
Huazhou District	2019	Weinan City	2843	.	31	2843	23199	31
Huazhou District	2020	Weinan City	2844	.	.	2844	21132	31
Huazhou District	2021	Weinan City	2844	.	.	2844	19065	31
Tongguan County	2012	Weinan City	.	.	9	137	3326	9
Tongguan County	2013	Weinan City	171	5943	10	171	5943	10
Tongguan County	2014	Weinan City	205	8560	10	205	8560	10
Tongguan County	2015	Weinan City	194	8208	11	194	8208	11
Tongguan County	2016	Weinan City	216	14600	10	216	14600	10
Tongguan County	2017	Weinan City	214	13333	13	214	13333	13
Tongguan County	2018	Weinan City	110	.	13	110	12066	13
Tongguan County	2019	Weinan City	45	.	8	45	10799	8
Tongguan County	2020	Weinan City	45	.	.	45	9532	3
Tongguan County	2021	Weinan City	49	.	.	49	8265	-2
Dali County	2012	Weinan City	.	.	89	197960	35970	89
Dali County	2013	Weinan City	101840	58160	101	101840	58160	101
Dali County	2014	Weinan City	5720	80350	103	5720	80350	103
Dali County	2015	Weinan City	5820	80350	110	5820	80350	110
Dali County	2016	Weinan City	5930	85470	103	5930	85470	103
Dali County	2017	Weinan City	17781	85463	114	17781	85463	114
Dali County	2018	Weinan City	21762	.	120	21762	85456	120
Dali County	2019	Weinan City	24077	.	116	24077	85449	116
Dali County	2020	Weinan City	24600	.	.	24600	85442	112
Dali County	2021	Weinan City	25595	.	.	25595	85435	108
Heyang County	2012	Weinan City	.	.	27	1473	35668	27
Heyang County	2013	Weinan City	1475	35667	30	1475	35667	30
Heyang County	2014	Weinan City	1477	35666	31	1477	35666	31
Heyang County	2015	Weinan City	1690	43333	32	1690	43333	32
Heyang County	2016	Weinan City	2103	43340	32	2103	43340	32
Heyang County	2017	Weinan City	2197	46200	30	2197	46200	30
Heyang County	2018	Weinan City	2201	.	33	2201	49060	33
Heyang County	2019	Weinan City	688	.	34	688	51920	34
Heyang County	2020	Weinan City	820	.	.	820	54780	35
Heyang County	2021	Weinan City	697	.	.	697	57640	36
Chengcheng County	2012	Weinan City	.	.	29	93	34033	29
Chengcheng County	2013	Weinan City	118	35466	32	118	35466	32
Chengcheng County	2014	Weinan City	143	36899	35	143	36899	35
Chengcheng County	2015	Weinan City	200	36899	37	200	36899	37
Chengcheng County	2016	Weinan City	251	42535	40	251	42535	40
Chengcheng County	2017	Weinan City	325	49336	35	325	49336	35
Chengcheng County	2018	Weinan City	570	.	38	570	56137	38
Chengcheng County	2019	Weinan City	652	.	101	652	62938	101
Chengcheng County	2020	Weinan City	716	.	.	716	69739	164
Chengcheng County	2021	Weinan City	909	.	.	909	76540	227
Pucheng County	2012	Weinan City	.	.	63	9070	77465	63
Pucheng County	2013	Weinan City	10076	77570	66	10076	77570	66
Pucheng County	2014	Weinan City	11082	77675	94	11082	77675	94
Pucheng County	2015	Weinan City	11887	77700	96	11887	77700	96
Pucheng County	2016	Weinan City	12548	77700	94	12548	77700	94
Pucheng County	2017	Weinan City	11572	77712	100	11572	77712	100
Pucheng County	2018	Weinan City	11900	.	102	11900	77724	102
Pucheng County	2019	Weinan City	.	.	37	12951	77736	37
Pucheng County	2020	Weinan City	14002	.	.	14002	77748	-28
Pucheng County	2021	Weinan City	14183	.	.	14183	77760	-93
Baishui County	2012	Weinan City	.	.	35	385	22900	35
Baishui County	2013	Weinan City	381	25000	38	381	25000	38
Baishui County	2014	Weinan City	377	27100	40	377	27100	40
Baishui County	2015	Weinan City	400	29333	41	400	29333	41
Baishui County	2016	Weinan City	407	28533	40	407	28533	40
Baishui County	2017	Weinan City	407	29700	32	407	29700	32
Baishui County	2018	Weinan City	466	.	33	466	30867	33
Baishui County	2019	Weinan City	430	.	31	430	32034	31
Baishui County	2020	Weinan City	430	.	.	430	33201	29
Baishui County	2021	Weinan City	412	.	.	412	34368	27
Fuping County	2012	Weinan City	.	.	53	-1548	60334	53
Fuping County	2013	Weinan City	414	70667	58	414	70667	58
Fuping County	2014	Weinan City	2376	81000	61	2376	81000	61
Fuping County	2015	Weinan City	2313	90000	73	2313	90000	73
Fuping County	2016	Weinan City	2516	78312	61	2516	78312	61
Fuping County	2017	Weinan City	5126	82000	62	5126	82000	62
Fuping County	2018	Weinan City	570	.	66	570	85688	66
Fuping County	2019	Weinan City	5420	.	78	5420	89376	78
Fuping County	2020	Weinan City	5127	.	.	5127	93064	90
Fuping County	2021	Weinan City	4615	.	.	4615	96752	102
Hancheng City	2012	Weinan City	.	.	28	1100	14273	28
Hancheng City	2013	Weinan City	1200	14273	28	1200	14273	28
Hancheng City	2014	Weinan City	1300	14273	30	1300	14273	30
Hancheng City	2015	Weinan City	1260	23400	31	1260	23400	31
Hancheng City	2016	Weinan City	1312	23400	28	1312	23400	28
Hancheng City	2017	Weinan City	1365	23200	26	1365	23200	26
Hancheng City	2018	Weinan City	1352	.	25	1352	23000	25
Hancheng City	2019	Weinan City	611	.	24	611	22800	24
Hancheng City	2020	Weinan City	602	.	.	602	22600	23
Hancheng City	2021	Weinan City	602	.	.	602	22400	22
Huayin City	2012	Weinan City	.	.	6	187	14637	6
Huayin City	2013	Weinan City	186	14582	6	186	14582	6
Huayin City	2014	Weinan City	185	14527	7	185	14527	7
Huayin City	2015	Weinan City	173	13133	7	173	13133	7
Huayin City	2016	Weinan City	192	13100	7	192	13100	7
Huayin City	2017	Weinan City	200	13134	8	200	13134	8
Huayin City	2018	Weinan City	1579	.	9	1579	13168	9
Huayin City	2019	Weinan City	1532	.	9	1532	13202	9
Huayin City	2020	Weinan City	1532	.	.	1532	13236	9
Huayin City	2021	Weinan City	409	.	.	409	13270	9
Baota District	2012	Yan’an City	.	.	15			15
Baota District	2013	Yan’an City	.	.	16			16
Baota District	2014	Yan’an City	.	.	17			17
Baota District	2015	Yan’an City	.	.	18			18
Baota District	2016	Yan’an City	.	.	8			8
Baota District	2017	Yan’an City	.	.	8			8
Baota District	2018	Yan’an City	.	.	8			8
Baota District	2019	Yan’an City	.	.	9			9
Baota District	2020	Yan’an City	.	.	.			10
Baota District	2021	Yan’an City	.	.	.			11
Ansai District	2012	Yan’an City	.	.	7	2248	1600	7
Ansai District	2013	Yan’an City	2375	2700	9	2375	2700	9
Ansai District	2014	Yan’an City	2502	3800	11	2502	3800	11
Ansai District	2015	Yan’an City	3606	3818	11	3606	3818	11
Ansai District	2016	Yan’an City	3821	4210	9	3821	4210	9
Ansai District	2017	Yan’an City	3919	4328	9	3919	4328	9
Ansai District	2018	Yan’an City	1965	.	10	1965	4446	10
Ansai District	2019	Yan’an City	3990	.	10	3990	4564	10
Ansai District	2020	Yan’an City	3940	.	.	3940	4682	10
Ansai District	2021	Yan’an City	4080	.	.	4080	4800	10
Yanchang County	2012	Yan’an City	.	.	9	977	131	9
Yanchang County	2013	Yan’an City	1017	133	9	1017	133	9
Yanchang County	2014	Yan’an City	1057	135	11	1057	135	11
Yanchang County	2015	Yan’an City	1106	135	11	1106	135	11
Yanchang County	2016	Yan’an City	1257	135	10	1257	135	10
Yanchang County	2017	Yan’an City	674	140	10	674	140	10
Yanchang County	2018	Yan’an City	715	.	13	715	145	13
Yanchang County	2019	Yan’an City	1193	.	11	1193	150	11
Yanchang County	2020	Yan’an City	1202	.	.	1202	155	9
Yanchang County	2021	Yan’an City	1368	.	.	1368	160	7
Yanchuan County	2012	Yan’an City	.	.	7	366	350	7
Yanchuan County	2013	Yan’an City	367	350	7	367	350	7
Yanchuan County	2014	Yan’an City	368	350	11	368	350	11
Yanchuan County	2015	Yan’an City	435	350	12	435	350	12
Yanchuan County	2016	Yan’an City	567	350	12	567	350	12
Yanchuan County	2017	Yan’an City	444	350	13	444	350	13
Yanchuan County	2018	Yan’an City	.	.	11	793	350	11
Yanchuan County	2019	Yan’an City	1142	.	13	1142	350	13
Yanchuan County	2020	Yan’an City	1163	.	.	1163	350	15
Yanchuan County	2021	Yan’an City	1312	.	.	1312	350	17
Zichang City	2012	Yan’an City	.	.	12	784	204	12
Zichang City	2013	Yan’an City	806	242	12	806	242	12
Zichang City	2014	Yan’an City	828	280	15	828	280	15
Zichang City	2015	Yan’an City	837	2200	15	837	2200	15
Zichang City	2016	Yan’an City	840	2266	10	840	2266	10
Zichang City	2017	Yan’an City	781	3100	11	781	3100	11
Zichang City	2018	Yan’an City	807	.	9	807	3934	9
Zichang City	2019	Yan’an City	1010	.	12	1010	4768	12
Zichang City	2020	Yan’an City	1034	.	.	1034	5602	15
Zichang City	2021	Yan’an City	1044	.	.	1044	6436	18
Zhidan County	2012	Yan’an City	.	.	13	1107	-940	13
Zhidan County	2013	Yan’an City	1110	30	14	1110	30	14
Zhidan County	2014	Yan’an City	1113	1000	15	1113	1000	15
Zhidan County	2015	Yan’an City	1142	1500	15	1142	1500	15
Zhidan County	2016	Yan’an City	1142	1430	9	1142	1430	9
Zhidan County	2017	Yan’an City	1161	1466	9	1161	1466	9
Zhidan County	2018	Yan’an City	.	.	9	1134.5	1502	9
Zhidan County	2019	Yan’an City	1108	.	9	1108	1538	9
Zhidan County	2020	Yan’an City	1174	.	.	1174	1574	9
Zhidan County	2021	Yan’an City	1175	.	.	1175	1610	9
Wuqi County	2012	Yan’an City	.	.	16	376	-143	16
Wuqi County	2013	Yan’an City	498	1540	18	498	1540	18
Wuqi County	2014	Yan’an City	620	3223	18	620	3223	18
Wuqi County	2015	Yan’an City	665	4332	19	665	4332	19
Wuqi County	2016	Yan’an City	481	6550	13	481	6550	13
Wuqi County	2017	Yan’an City	570	5870	14	570	5870	14
Wuqi County	2018	Yan’an City	44	.	14	44	5190	14
Wuqi County	2019	Yan’an City	504	.	15	504	4510	15
Wuqi County	2020	Yan’an City	504	.	.	504	3830	16
Wuqi County	2021	Yan’an City	199	.	.	199	3150	17
Ganquan County	2012	Yan’an City	.	.	8	684	67	8
Ganquan County	2013	Yan’an City	686	100	8	686	100	8
Ganquan County	2014	Yan’an City	688	133	9	688	133	9
Ganquan County	2015	Yan’an City	932	5000	9	932	5000	9
Ganquan County	2016	Yan’an City	1014	2250	7	1014	2250	7
Ganquan County	2017	Yan’an City	1304	2250	7	1304	2250	7
Ganquan County	2018	Yan’an City	1318	.	7	1318	2250	7
Ganquan County	2019	Yan’an City	1331	.	8	1331	2250	8
Ganquan County	2020	Yan’an City	1371	.	.	1371	2250	9
Ganquan County	2021	Yan’an City	1418	.	.	1418	2250	10
Fu County	2012	Yan’an City	.	.	15	593	10677	15
Fu County	2013	Yan’an City	624	6110	16	624	6110	16
Fu County	2014	Yan’an City	655	1543	18	655	1543	18
Fu County	2015	Yan’an City	658	1543	18	658	1543	18
Fu County	2016	Yan’an City	573	4400	11	573	4400	11
Fu County	2017	Yan’an City	559	4880	11	559	4880	11
Fu County	2018	Yan’an City	559	.	12	559	5360	12
Fu County	2019	Yan’an City	537	.	12	537	5840	12
Fu County	2020	Yan’an City	567	.	.	567	6320	12
Fu County	2021	Yan’an City	567	.	.	567	6800	12
Luochuan County	2012	Yan’an City	.	.	25	-91	4650	25
Luochuan County	2013	Yan’an City	.	4520	28	-78	4520	28
Luochuan County	2014	Yan’an City	.	4390	30	-65	4390	30
Luochuan County	2015	Yan’an City	.	4910	32	-52	4910	32
Luochuan County	2016	Yan’an City	.	5260	25	-39	5260	25
Luochuan County	2017	Yan’an City	.	6710	26	-26	6710	26
Luochuan County	2018	Yan’an City	.	.	26	-13	8160	26
Luochuan County	2019	Yan’an City	.	.	26	0	9610	26
Luochuan County	2020	Yan’an City	13	.	.	13	11060	26
Luochuan County	2021	Yan’an City	26	.	.	26	12510	26
Yichuan County	2012	Yan’an City	.	.	24	282	2206	24
Yichuan County	2013	Yan’an City	287	1813	26	287	1813	26
Yichuan County	2014	Yan’an City	292	1420	27	292	1420	27
Yichuan County	2015	Yan’an City	298	1420	28	298	1420	28
Yichuan County	2016	Yan’an City	250	1420	17	250	1420	17
Yichuan County	2017	Yan’an City	298	2860	18	298	2860	18
Yichuan County	2018	Yan’an City	.	.	18	330.5	4300	18
Yichuan County	2019	Yan’an City	363	.	18	363	5740	18
Yichuan County	2020	Yan’an City	367	.	.	367	7180	18
Yichuan County	2021	Yan’an City	366	.	.	366	8620	18
Huanglong County	2012	Yan’an City	.	.	5	-2	6106	5
Huanglong County	2013	Yan’an City	1	6003	7	1	6003	7
Huanglong County	2014	Yan’an City	4	5900	8	4	5900	8
Huanglong County	2015	Yan’an City	4	7100	8	4	7100	8
Huanglong County	2016	Yan’an City	5	7800	7	5	7800	7
Huanglong County	2017	Yan’an City	5	6930	7	5	6930	7
Huanglong County	2018	Yan’an City	61	.	8	61	6060	8
Huanglong County	2019	Yan’an City	14	.	8	14	5190	8
Huanglong County	2020	Yan’an City	16	.	.	16	4320	8
Huanglong County	2021	Yan’an City	15	.	.	15	3450	8
Huangling County	2012	Yan’an City	.	.	24	109	303	24
Huangling County	2013	Yan’an City	131	456	26	131	456	26
Huangling County	2014	Yan’an City	153	609	27	153	609	27
Huangling County	2015	Yan’an City	113	652	27	113	652	27
Huangling County	2016	Yan’an City	139	749	17	139	749	17
Huangling County	2017	Yan’an City	95	607	17	95	607	17
Huangling County	2018	Yan’an City	2115	.	18	2115	465	18
Huangling County	2019	Yan’an City	305	.	18	305	323	18
Huangling County	2020	Yan’an City	290	.	.	290	181	18
Huangling County	2021	Yan’an City	346	.	.	346	39	18
Hantai District	2012	Hanzhong City	.	.	12			12
Hantai District	2013	Hanzhong City	.	.	14			14
Hantai District	2014	Hanzhong City	.	.	15			15
Hantai District	2015	Hanzhong City	.	.	17			17
Hantai District	2016	Hanzhong City	.	.	17			17
Hantai District	2017	Hanzhong City	.	.	18			18
Hantai District	2018	Hanzhong City	.	.	18			18
Hantai District	2019	Hanzhong City	.	.	19			19
Hantai District	2020	Hanzhong City	.	.	.			20
Hantai District	2021	Hanzhong City	.	.	.			21
Nanzheng District	2012	Hanzhong City	.	.	18	488	16220	18
Nanzheng District	2013	Hanzhong City	479	16250	20	479	16250	20
Nanzheng District	2014	Hanzhong City	470	16280	22	470	16280	22
Nanzheng District	2015	Hanzhong City	487	23300	22	487	23300	22
Nanzheng District	2016	Hanzhong City	497	23900	21	497	23900	21
Nanzheng District	2017	Hanzhong City	270	25067	23	270	25067	23
Nanzheng District	2018	Hanzhong City	64	.	23	64	26234	23
Nanzheng District	2019	Hanzhong City	70	.	23	70	27401	23
Nanzheng District	2020	Hanzhong City	241	.	.	241	28568	23
Nanzheng District	2021	Hanzhong City	211	.	.	211	29735	23
Chenggu County	2012	Hanzhong City	.	.	20	270	17972	20
Chenggu County	2013	Hanzhong City	316	18320	23	316	18320	23
Chenggu County	2014	Hanzhong City	362	18668	24	362	18668	24
Chenggu County	2015	Hanzhong City	363	18835	25	363	18835	25
Chenggu County	2016	Hanzhong City	364	18856	23	364	18856	23
Chenggu County	2017	Hanzhong City	393	19045	24	393	19045	24
Chenggu County	2018	Hanzhong City	340	.	25	340	19234	25
Chenggu County	2019	Hanzhong City	334	.	25	334	19423	25
Chenggu County	2020	Hanzhong City	335	.	.	335	19612	25
Chenggu County	2021	Hanzhong City	436	.	.	436	19801	25
Yang County	2012	Hanzhong City	.	.	19	219	11960	19
Yang County	2013	Hanzhong City	271	12520	21	271	12520	21
Yang County	2014	Hanzhong City	323	13080	22	323	13080	22
Yang County	2015	Hanzhong City	326	13705	23	326	13705	23
Yang County	2016	Hanzhong City	335	22150	20	335	22150	20
Yang County	2017	Hanzhong City	281	22888	20	281	22888	20
Yang County	2018	Hanzhong City	263	.	20	263	23626	20
Yang County	2019	Hanzhong City	267	.	22	267	24364	22
Yang County	2020	Hanzhong City	473	.	.	473	25102	24
Yang County	2021	Hanzhong City	487	.	.	487	25840	26
Xixiang County	2012	Hanzhong City	.	.	32	36	10676	32
Xixiang County	2013	Hanzhong City	105	10716	33	105	10716	33
Xixiang County	2014	Hanzhong City	174	10756	33	174	10756	33
Xixiang County	2015	Hanzhong City	172	11600	35	172	11600	35
Xixiang County	2016	Hanzhong City	194	10334	27	194	10334	27
Xixiang County	2017	Hanzhong City	205	12643	27	205	12643	27
Xixiang County	2018	Hanzhong City	208	.	24	208	14952	24
Xixiang County	2019	Hanzhong City	165	.	23	165	17261	23
Xixiang County	2020	Hanzhong City	146	.	.	146	19570	22
Xixiang County	2021	Hanzhong City	145	.	.	145	21879	21
Mian County	2012	Hanzhong City	.	.	13	315	9432	13
Mian County	2013	Hanzhong City	342	10016	16	342	10016	16
Mian County	2014	Hanzhong City	369	10600	17	369	10600	17
Mian County	2015	Hanzhong City	303	11000	19	303	11000	19
Mian County	2016	Hanzhong City	297	11100	17	297	11100	17
Mian County	2017	Hanzhong City	1247	11267	17	1247	11267	17
Mian County	2018	Hanzhong City	278	.	19	278	11434	19
Mian County	2019	Hanzhong City	280	.	20	280	11601	20
Mian County	2020	Hanzhong City	317	.	.	317	11768	21
Mian County	2021	Hanzhong City	338	.	.	338	11935	22
Ningqiang County	2012	Hanzhong City	.	.	14	-27	989	14
Ningqiang County	2013	Hanzhong City	22	1173	15	22	1173	15
Ningqiang County	2014	Hanzhong City	71	1357	17	71	1357	17
Ningqiang County	2015	Hanzhong City	28	675	18	28	675	18
Ningqiang County	2016	Hanzhong City	31	1146	19	31	1146	19
Ningqiang County	2017	Hanzhong City	127	1146	20	127	1146	20
Ningqiang County	2018	Hanzhong City	134	.	21	134	1146	21
Ningqiang County	2019	Hanzhong City	145	.	21	145	1146	21
Ningqiang County	2020	Hanzhong City	155	.	.	155	1146	21
Ningqiang County	2021	Hanzhong City	223	.	.	223	1146	21
Lueyang County	2012	Hanzhong City	.	.	23	126	64	23
Lueyang County	2013	Hanzhong City	131	160	25	131	160	25
Lueyang County	2014	Hanzhong City	136	256	25	136	256	25
Lueyang County	2015	Hanzhong City	165	416	25	165	416	25
Lueyang County	2016	Hanzhong City	165	565	21	165	565	21
Lueyang County	2017	Hanzhong City	167	670	22	167	670	22
Lueyang County	2018	Hanzhong City	169	.	22	169	775	22
Lueyang County	2019	Hanzhong City	196	.	22	196	880	22
Lueyang County	2020	Hanzhong City	205	.	.	205	985	22
Lueyang County	2021	Hanzhong City	300	.	.	300	1090	22
Zhenba County	2012	Hanzhong City	.	.	9	2	300	9
Zhenba County	2013	Hanzhong City	2	330	10	2	330	10
Zhenba County	2014	Hanzhong City	2	360	10	2	360	10
Zhenba County	2015	Hanzhong City	12	360	10	12	360	10
Zhenba County	2016	Hanzhong City	16	360	8	16	360	8
Zhenba County	2017	Hanzhong City	19	340	7	19	340	7
Zhenba County	2018	Hanzhong City	.	.	7	12.5	320	7
Zhenba County	2019	Hanzhong City	6	.	7	6	300	7
Zhenba County	2020	Hanzhong City	6	.	.	6	280	7
Zhenba County	2021	Hanzhong City	130	.	.	130	260	7
Liuba County	2012	Hanzhong City	.	.	2	19	142	2
Liuba County	2013	Hanzhong City	18	186	3	18	186	3
Liuba County	2014	Hanzhong City	17	230	3	17	230	3
Liuba County	2015	Hanzhong City	15	230	4	15	230	4
Liuba County	2016	Hanzhong City	18	230	4	18	230	4
Liuba County	2017	Hanzhong City	18	230	4	18	230	4
Liuba County	2018	Hanzhong City	8	.	4	8	230	4
Liuba County	2019	Hanzhong City	76	.	4	76	230	4
Liuba County	2020	Hanzhong City	120	.	.	120	230	4
Liuba County	2021	Hanzhong City	131	.	.	131	230	4
Foping County	2012	Hanzhong City	.	.	2	1	425	2
Foping County	2013	Hanzhong City	.	.	4	3	433	4
Foping County	2014	Hanzhong City	.	441	4	5	441	4
Foping County	2015	Hanzhong City	.	449	4	7	449	4
Foping County	2016	Hanzhong City	.	.	3	9	457	3
Foping County	2017	Hanzhong City	.	.	3	11	465	3
Foping County	2018	Hanzhong City	13	.	3	13	473	3
Foping County	2019	Hanzhong City	15	.	3	15	481	3
Foping County	2020	Hanzhong City	15	.	.	15	489	3
Foping County	2021	Hanzhong City	17	.	.	17	497	3
Yuyang District	2012	Yulin City	.	.	38			38
Yuyang District	2013	Yulin City	.	.	43			43
Yuyang District	2014	Yulin City	.	.	48			48
Yuyang District	2015	Yulin City	.	.	49			49
Yuyang District	2016	Yulin City	.	.	37			37
Yuyang District	2017	Yulin City	.	.	39			39
Yuyang District	2018	Yulin City	.	.	42			42
Yuyang District	2019	Yulin City	.	.	43			43
Yuyang District	2020	Yulin City	.	.	.			44
Yuyang District	2021	Yulin City	.	.	.			45
Hengshan District	2012	Yulin City	.	.	24	244	8749	24
Hengshan District	2013	Yulin City	257	8749	25	257	8749	25
Hengshan District	2014	Yulin City	270	8749	28	270	8749	28
Hengshan District	2015	Yulin City	270	8900	29	270	8900	29
Hengshan District	2016	Yulin City	292	8810	17	292	8810	17
Hengshan District	2017	Yulin City	295	7200	19	295	7200	19
Hengshan District	2018	Yulin City	77	.	27	77	5590	27
Hengshan District	2019	Yulin City	340	.	22	340	3980	22
Hengshan District	2020	Yulin City	300	.	.	300	2370	17
Hengshan District	2021	Yulin City	300	.	.	300	760	12
Fugu County	2012	Yulin City	.	.	32	242		32
Fugu County	2013	Yulin City	210	1340	32	210	1340	32
Fugu County	2014	Yulin City	178	.	32	178		32
Fugu County	2015	Yulin City	178	.	34	178		34
Fugu County	2016	Yulin City	139	.	23	139		23
Fugu County	2017	Yulin City	127	.	23	127		23
Fugu County	2018	Yulin City	113	.	24	113		24
Fugu County	2019	Yulin City	119	.	24	119		24
Fugu County	2020	Yulin City	82	.	.	82		24
Fugu County	2021	Yulin City	67	.	.	67		24
Jingbian County	2012	Yulin City	.	.	45	1168.5	19314	45
Jingbian County	2013	Yulin City	2270	24657	47	2270	24657	47
Jingbian County	2014	Yulin City	2264	30000	55	2264	30000	55
Jingbian County	2015	Yulin City	2344	32000	58	2344	32000	58
Jingbian County	2016	Yulin City	2344	30667	45	2344	30667	45
Jingbian County	2017	Yulin City	2344	60031	47	2344	60031	47
Jingbian County	2018	Yulin City	2133	.	21	2133	89395	21
Jingbian County	2019	Yulin City	2133	.	54	2133	118759	54
Jingbian County	2020	Yulin City	2596	.	.	2596	148123	87
Jingbian County	2021	Yulin City	2596	.	.	2596	8034	44
Dingbian County	2012	Yulin City	.	.	50	1853	19113	50
Dingbian County	2013	Yulin City	1110	30192	56	1110	30192	56
Dingbian County	2014	Yulin City	1327	41271	61	1327	41271	61
Dingbian County	2015	Yulin City	1434	45066	63	1434	45066	63
Dingbian County	2016	Yulin City	1319	109244	46	1319	109244	46
Dingbian County	2017	Yulin City	1352	119236	53	1352	119236	53
Dingbian County	2018	Yulin City	999	.	50	999	129228	50
Dingbian County	2019	Yulin City	860	.	60	860	139220	60
Dingbian County	2020	Yulin City	1333	.	.	1333	149212	70
Dingbian County	2021	Yulin City	914	.	.	914		14
Suide County	2012	Yulin City	.	.	15	723		15
Suide County	2013	Yulin City	532	.	16	532		16
Suide County	2014	Yulin City	532	.	18	532		18
Suide County	2015	Yulin City	532	.	19	532		19
Suide County	2016	Yulin City	532	.	15	532		15
Suide County	2017	Yulin City	532	.	17	532		17
Suide County	2018	Yulin City	688	.	58	688		58
Suide County	2019	Yulin City	155	.	17	155		17
Suide County	2020	Yulin City	170	.	.	170		-24
Suide County	2021	Yulin City	170	.	.	170		11
Mizhi County	2012	Yulin City	.	.	14	94		14
Mizhi County	2013	Yulin City	18	923	17	18	923	17
Mizhi County	2014	Yulin City	26	.	18	26		18
Mizhi County	2015	Yulin City	13	.	18	13		18
Mizhi County	2016	Yulin City	13	.	14	13		14
Mizhi County	2017	Yulin City	22	.	15	22		15
Mizhi County	2018	Yulin City	27	.	17	27		17
Mizhi County	2019	Yulin City	19	.	15	19		15
Mizhi County	2020	Yulin City	19	.	.	19		13
Mizhi County	2021	Yulin City	19	.	.	19	133	10
Jia County	2012	Yulin City	.	.	11	31.5	133	11
Jia County	2013	Yulin City	44	.	12	44	133	12
Jia County	2014	Yulin City	50	.	14	50	133	14
Jia County	2015	Yulin City	62	.	16	62	133	16
Jia County	2016	Yulin City	58	133	12	58	133	12
Jia County	2017	Yulin City	64	133	13	64	133	13
Jia County	2018	Yulin City	.	.	15	36.5	133	15
Jia County	2019	Yulin City	9	.	15	9	133	15
Jia County	2020	Yulin City	68	.	.	68	133	15
Jia County	2021	Yulin City	68	.	.	68		7
Wubu County	2012	Yulin City	.	.	7	40.5		7
Wubu County	2013	Yulin City	13	.	7	13		7
Wubu County	2014	Yulin City	13	.	7	13		7
Wubu County	2015	Yulin City	13	.	8	13		8
Wubu County	2016	Yulin City	52	.	4	52		4
Wubu County	2017	Yulin City	146	.	4	146		4
Wubu County	2018	Yulin City	.	.	13	84		13
Wubu County	2019	Yulin City	22	.	5	22		5
Wubu County	2020	Yulin City	22	.	.	22		-3
Wubu County	2021	Yulin City	18	.	.	18		12
Qingjian County	2012	Yulin City	.	.	14	142.5		14
Qingjian County	2013	Yulin City	267	.	16	267		16
Qingjian County	2014	Yulin City	205	.	17	205		17
Qingjian County	2015	Yulin City	212	.	18	212		18
Qingjian County	2016	Yulin City	268	.	13	268		13
Qingjian County	2017	Yulin City	271	.	14	271		14
Qingjian County	2018	Yulin City	158	.	5	158		5
Qingjian County	2019	Yulin City	201	.	14	201		14
Qingjian County	2020	Yulin City	222	.	.	222		23
Qingjian County	2021	Yulin City	227	.	.	227		9
Zizhou County	2012	Yulin City	.	.	10	125		10
Zizhou County	2013	Yulin City	23	.	11	23		11
Zizhou County	2014	Yulin City	25	.	13	25		13
Zizhou County	2015	Yulin City	29	.	13	29		13
Zizhou County	2016	Yulin City	29	.	10	29		10
Zizhou County	2017	Yulin City	34	.	10	34		10
Zizhou County	2018	Yulin City	35	.	14	35		14
Zizhou County	2019	Yulin City	20	.	10	20		10
Zizhou County	2020	Yulin City	40	.	.	40		6
Zizhou County	2021	Yulin City	41	.	.	41		29
Shenmu City	2012	Yulin City	.	.	29	804		29
Shenmu City	2013	Yulin City	1567	.	29	1567		29
Shenmu City	2014	Yulin City	1587	.	40	1587		40
Shenmu City	2015	Yulin City	2801	.	41	2801		41
Shenmu City	2016	Yulin City	2800	.	24	2800		24
Shenmu City	2017	Yulin City	764	.	26	764		26
Shenmu City	2018	Yulin City	.	.	10	520.5		10
Shenmu City	2019	Yulin City	277	.	28	277		28
Shenmu City	2020	Yulin City	759	.	.	759		46
Shenmu City	2021	Yulin City	774	.	.	774		35
Hanbin District	2012	Ankang City	.	.	39			39
Hanbin District	2013	Ankang City	.	.	43			43
Hanbin District	2014	Ankang City	.	.	53			53
Hanbin District	2015	Ankang City	.	.	55			55
Hanbin District	2016	Ankang City	.	.	56			56
Hanbin District	2017	Ankang City	.	.	58			58
Hanbin District	2018	Ankang City	.	.	62			62
Hanbin District	2019	Ankang City	.	.	66			66
Hanbin District	2020	Ankang City	.	.	.			70
Hanbin District	2021	Ankang City	.	.	.	863	-18605	17
Hanyin County	2012	Ankang City	.	.	18	875	-4070	18
Hanyin County	2013	Ankang City	887	10465	19	887	10465	19
Hanyin County	2014	Ankang City	899	25000	22	899	25000	22
Hanyin County	2015	Ankang City	1054	2586	22	1054	2586	22
Hanyin County	2016	Ankang City	858	6400	23	858	6400	23
Hanyin County	2017	Ankang City	858	6473	24	858	6473	24
Hanyin County	2018	Ankang City	817	.	25	817	6546	25
Hanyin County	2019	Ankang City	734	.	26	734	6619	26
Hanyin County	2020	Ankang City	746	.	.	746	6692	27
Hanyin County	2021	Ankang City	745	.	.	745	2639	12
Shiquan County	2012	Ankang City	.	.	12	381	2718	12
Shiquan County	2013	Ankang City	17	2797	12	17	2797	12
Shiquan County	2014	Ankang City	18	2876	12	18	2876	12
Shiquan County	2015	Ankang City	20	2967	13	20	2967	13
Shiquan County	2016	Ankang City	27	3600	13	27	3600	13
Shiquan County	2017	Ankang City	49	3700	14	49	3700	14
Shiquan County	2018	Ankang City	409	.	15	409	3800	15
Shiquan County	2019	Ankang City	416	.	16	416	3900	16
Shiquan County	2020	Ankang City	371	.	.	371	4000	17
Shiquan County	2021	Ankang City	410	.	.	410		5
Ningshan County	2012	Ankang City	.	.	5	206.5		5
Ningshan County	2013	Ankang City	3	.	5	3		5
Ningshan County	2014	Ankang City	2	.	5	2		5
Ningshan County	2015	Ankang City	2	.	5	2		5
Ningshan County	2016	Ankang City	2	.	6	2		6
Ningshan County	2017	Ankang City	2	.	6	2		6
Ningshan County	2018	Ankang City	14	.	6	14		6
Ningshan County	2019	Ankang City	66	.	7	66		7
Ningshan County	2020	Ankang City	81	.	.	81		8
Ningshan County	2021	Ankang City	101	.	.	101		14
Ziyang County	2012	Ankang City	.	.	14	54		14
Ziyang County	2013	Ankang City	7	.	14	7		14
Ziyang County	2014	Ankang City	7	.	16	7		16
Ziyang County	2015	Ankang City	7	.	16	7		16
Ziyang County	2016	Ankang City	7	.	17	7		17
Ziyang County	2017	Ankang City	50	.	17	50		17
Ziyang County	2018	Ankang City	291	.	18	291		18
Ziyang County	2019	Ankang City	46	.	20	46		20
Ziyang County	2020	Ankang City	12	.	.	12		22
Ziyang County	2021	Ankang City	12	.	.	12	9	8
Langao County	2012	Ankang City	.	.	8	38.5	10	8
Langao County	2013	Ankang City	65	.	8	65	11	8
Langao County	2014	Ankang City	78	.	9	78	12	9
Langao County	2015	Ankang City	91	13	9	91	13	9
Langao County	2016	Ankang City	78	14	10	78	14	10
Langao County	2017	Ankang City	7	120	10	7	120	10
Langao County	2018	Ankang City	54	.	10	54	226	10
Langao County	2019	Ankang City	333	.	11	333	332	11
Langao County	2020	Ankang City	7	.	.	7	438	12
Langao County	2021	Ankang City	7	.	.	7	-185	10
Pingli County	2012	Ankang City	.	.	11	1287.5	-80	11
Pingli County	2013	Ankang City	2568	25	12	2568	25	12
Pingli County	2014	Ankang City	2568	130	13	2568	130	13
Pingli County	2015	Ankang City	2568	140	13	2568	140	13
Pingli County	2016	Ankang City	2568	2000	14	2568	2000	14
Pingli County	2017	Ankang City	2568	2160	15	2568	2160	15
Pingli County	2018	Ankang City	2568	.	16	2568	2320	16
Pingli County	2019	Ankang City	264	.	18	264	2480	18
Pingli County	2020	Ankang City	270	.	.	270	2640	20
Pingli County	2021	Ankang City	65	.	.	65		4
Zhenping County	2012	Ankang City	.	.	4	39		4
Zhenping County	2013	Ankang City	13	.	4	13		4
Zhenping County	2014	Ankang City	13	.	4	13		4
Zhenping County	2015	Ankang City	13	.	4	13		4
Zhenping County	2016	Ankang City	6	.	5	6		5
Zhenping County	2017	Ankang City	13	.	5	13		5
Zhenping County	2018	Ankang City	13	.	5	13		5
Zhenping County	2019	Ankang City	15	.	5	15		5
Zhenping County	2020	Ankang City	15	.	.	15		5
Zhenping County	2021	Ankang City	16	.	.	16	-6073	19
Xunyang County	2012	Ankang City	.	.	23	495.5	-2782	23
Xunyang County	2013	Ankang City	975	509	27	975	509	27
Xunyang County	2014	Ankang City	1039	3800	29	1039	3800	29
Xunyang County	2015	Ankang City	982	3850	30	982	3850	30
Xunyang County	2016	Ankang City	620	3968	30	620	3968	30
Xunyang County	2017	Ankang City	531	3992	31	531	3992	31
Xunyang County	2018	Ankang City	541	.	32	541	4016	32
Xunyang County	2019	Ankang City	513	.	34	513	4040	34
Xunyang County	2020	Ankang City	496	.	.	496	4064	36
Xunyang County	2021	Ankang City	491	.	.	491		11
Baihe County	2012	Ankang City	.	.	12	249		12
Baihe County	2013	Ankang City	7	.	13	7		13
Baihe County	2014	Ankang City	7	.	13	7		13
Baihe County	2015	Ankang City	10	.	14	10		14
Baihe County	2016	Ankang City	11	.	14	11		14
Baihe County	2017	Ankang City	11	.	14	11		14
Baihe County	2018	Ankang City	14	.	15	14		15
Baihe County	2019	Ankang City	134	.	16	134		16
Baihe County	2020	Ankang City	138	.	.	138		17
Baihe County	2021	Ankang City	141	.	.	141	-999	14
Shangzhou District	2012	Shangluo City	.	.	15	158	-266	15
Shangzhou District	2013	Shangluo City	175	467	16	175	467	16
Shangzhou District	2014	Shangluo City	230	1200	17	230	1200	17
Shangzhou District	2015	Shangluo City	239	1000	17	239	1000	17
Shangzhou District	2016	Shangluo City	223	1070	10	223	1070	10
Shangzhou District	2017	Shangluo City	270	1200	10	270	1200	10
Shangzhou District	2018	Shangluo City	172	.	10	172	1330	10
Shangzhou District	2019	Shangluo City	295	.	10	295	1460	10
Shangzhou District	2020	Shangluo City	301	.	.	301	1590	10
Shangzhou District	2021	Shangluo City	342	.	.	342	-30	14
Luonan County	2012	Shangluo City	.	.	15	272.5	0	15
Luonan County	2013	Shangluo City	203	30	16	203	30	16
Luonan County	2014	Shangluo City	243	60	17	243	60	17
Luonan County	2015	Shangluo City	357	220	18	357	220	18
Luonan County	2016	Shangluo City	352	250	15	352	250	15
Luonan County	2017	Shangluo City	386	298	15	386	298	15
Luonan County	2018	Shangluo City	358	.	15	358	346	15
Luonan County	2019	Shangluo City	270	.	16	270	394	16
Luonan County	2020	Shangluo City	336	.	.	336	442	17
Luonan County	2021	Shangluo City	339	.	.	339		6
Danfeng County	2012	Shangluo City	.	.	6	196		6
Danfeng County	2013	Shangluo City	53	.	6	53		6
Danfeng County	2014	Shangluo City	35	.	9	35		9
Danfeng County	2015	Shangluo City	41	.	9	41		9
Danfeng County	2016	Shangluo City	62	.	5	62		5
Danfeng County	2017	Shangluo City	72	.	5	72		5
Danfeng County	2018	Shangluo City	.	.	5	81.5		5
Danfeng County	2019	Shangluo City	91	.	5	91		5
Danfeng County	2020	Shangluo City	83	.	.	83		5
Danfeng County	2021	Shangluo City	85	.	.	85	592	6
Shangnan County	2012	Shangluo City	.	.	7	106.5	603	7
Shangnan County	2013	Shangluo City	128	614	8	128	614	8
Shangnan County	2014	Shangluo City	178	625	10	178	625	10
Shangnan County	2015	Shangluo City	202	625	10	202	625	10
Shangnan County	2016	Shangluo City	267	630	8	267	630	8
Shangnan County	2017	Shangluo City	351	635	8	351	635	8
Shangnan County	2018	Shangluo City	357	.	8	357	640	8
Shangnan County	2019	Shangluo City	244	.	8	244	645	8
Shangnan County	2020	Shangluo City	222	.	.	222	650	8
Shangnan County	2021	Shangluo City	225	.	.	225	2500	16
Shanyang County	2012	Shangluo City	.	.	17	360	2650	17
Shanyang County	2013	Shangluo City	495	2800	18	495	2800	18
Shanyang County	2014	Shangluo City	436	2950	19	436	2950	19
Shanyang County	2015	Shangluo City	419	2950	19	419	2950	19
Shanyang County	2016	Shangluo City	387	3046	12	387	3046	12
Shanyang County	2017	Shangluo City	437	3166	12	437	3166	12
Shanyang County	2018	Shangluo City	351	.	12	351	3286	12
Shanyang County	2019	Shangluo City	161	.	12	161	3406	12
Shanyang County	2020	Shangluo City	119	.	.	119	3526	12
Shanyang County	2021	Shangluo City	135	.	.	135	1050	13
Zhen’an County	2012	Shangluo City	.	.	13	106	1055	13
Zhen’an County	2013	Shangluo City	77	1060	13	77	1060	13
Zhen’an County	2014	Shangluo City	70	1065	15	70	1065	15
Zhen’an County	2015	Shangluo City	66	.	15	66	1070	15
Zhen’an County	2016	Shangluo City	64	.	12	64	1075	12
Zhen’an County	2017	Shangluo City	101	.	13	101	1080	13
Zhen’an County	2018	Shangluo City	102	.	13	102	1085	13
Zhen’an County	2019	Shangluo City	105	.	13	105	1090	13
Zhen’an County	2020	Shangluo City	116	.	.	116	1095	13
Zhen’an County	2021	Shangluo City	116	.	.	116	311	7
Zhashui County	2012	Shangluo City	.	.	7	59	314	7
Zhashui County	2013	Shangluo City	2	317	7	2	317	7
Zhashui County	2014	Shangluo City	2	320	7	2	320	7
Zhashui County	2015	Shangluo City	2	320	7	2	320	7
Zhashui County	2016	Shangluo City	2	320	5	2	320	5
Zhashui County	2017	Shangluo City	5	300	5	5	300	5
Zhashui County	2018	Shangluo City	2	.	5	2	280	5
Zhashui County	2019	Shangluo City	60	.	5	60	260	5
Zhashui County	2020	Shangluo City	95	.	.	95	240	5
Zhashui County	2021	Shangluo City	96	.	.	96	240	5

## Sheet: Ecological environment (B3)
County/District	Year	City	Agricultural Fertilizer Application(tons)	Average annual PM2.5 value(μg/m3)	b31x	b32x
Chang’an District	2012	Xi’an City	30456	59.1709	30456	59.1709
Chang’an District	2013	Xi’an City	30124	58.0271	30124	58.0271
Chang’an District	2014	Xi’an City	29920	52.2756	29920	52.2756
Chang’an District	2015	Xi’an City	27318	45.9219	27318	45.9219
Chang’an District	2016	Xi’an City	21888	48.8199	21888	48.8199
Chang’an District	2017	Xi’an City	17602	49.5506	17602	49.5506
Chang’an District	2018	Xi’an City	16026	42.3985	16026	42.3985
Chang’an District	2019	Xi’an City	15572	.	15572	35.2464
Chang’an District	2020	Xi’an City	.	.	15118	28.0943
Chang’an District	2021	Xi’an City	.	.	14664	20.9422
Baqiao District	2012	Xi’an City	10372	80.4425	10372	80.4425
Baqiao District	2013	Xi’an City	8705	81.2906	8705	81.2906
Baqiao District	2014	Xi’an City	8616	71.3758	8616	71.3758
Baqiao District	2015	Xi’an City	7798	58.2324	7798	58.2324
Baqiao District	2016	Xi’an City	7645	68.1399	7645	68.1399
Baqiao District	2017	Xi’an City	7484	68.616	7484	68.616
Baqiao District	2018	Xi’an City	7121	57.0711	7121	57.0711
Baqiao District	2019	Xi’an City	2352	.	2352	45.5261
Baqiao District	2020	Xi’an City	2729	.	2729	33.9811
Baqiao District	2021	Xi’an City	.	.	3106	22.4362
Yanta District	2012	Xi’an City	148	83.9125	148	83.9125
Yanta District	2013	Xi’an City	122	83.8292	122	83.8292
Yanta District	2014	Xi’an City	115	73.6736	115	73.6736
Yanta District	2015	Xi’an City	.	62.1153	108	62.1153
Yanta District	2016	Xi’an City	.	73.0035	101	73.0035
Yanta District	2017	Xi’an City	.	77.1035	94	77.1035
Yanta District	2018	Xi’an City	.	63.0812	87	63.0812
Yanta District	2019	Xi’an City	.	.	80	49.059
Yanta District	2020	Xi’an City	.	.	73	35.0368
Yanta District	2021	Xi’an City	.	.	66	21.0146
Weiyang District	2012	Xi’an City	808	82.9295	808	82.9295
Weiyang District	2013	Xi’an City	1642	83.4542	1642	83.4542
Weiyang District	2014	Xi’an City	1524	73.642	1524	73.642
Weiyang District	2015	Xi’an City	1418	59.3136	1418	59.3136
Weiyang District	2016	Xi’an City	281	75.6727	281	75.6727
Weiyang District	2017	Xi’an City	239	74.5572	239	74.5572
Weiyang District	2018	Xi’an City	204	61.9307	204	61.9307
Weiyang District	2019	Xi’an City	169	.	169	49.3042
Weiyang District	2020	Xi’an City	178	.	178	36.6777
Weiyang District	2021	Xi’an City	.	.	187	24.0511
Beilin District	2012	Xi’an City	.	85.3217		85.3217
Beilin District	2013	Xi’an City	.	84.713		84.713
Beilin District	2014	Xi’an City	.	75.8739		75.8739
Beilin District	2015	Xi’an City	.	59.5913		59.5913
Beilin District	2016	Xi’an City	.	77.5348		77.5348
Beilin District	2017	Xi’an City	.	76.4478		76.4478
Beilin District	2018	Xi’an City	.	63.287		63.287
Beilin District	2019	Xi’an City	.	.		50.1261
Beilin District	2020	Xi’an City	.	.		36.9652
Beilin District	2021	Xi’an City	.	.		23.8044
Xincheng District	2012	Xi’an City	.	84.469		84.469
Xincheng District	2013	Xi’an City	.	84.2448		84.2448
Xincheng District	2014	Xi’an City	.	74.9724		74.9724
Xincheng District	2015	Xi’an City	.	57.6966		57.6966
Xincheng District	2016	Xi’an City	.	76.7103		76.7103
Xincheng District	2017	Xi’an City	.	74.7483		74.7483
Xincheng District	2018	Xi’an City	.	62.6034		62.6034
Xincheng District	2019	Xi’an City	.	.		50.4586
Xincheng District	2020	Xi’an City	.	.		38.3138
Xincheng District	2021	Xi’an City	.	.		26.169
Lianhu District	2012	Xi’an City	.	84.6444		84.6444
Lianhu District	2013	Xi’an City	.	84.05		84.05
Lianhu District	2014	Xi’an City	.	74.8472		74.8472
Lianhu District	2015	Xi’an City	.	59.175		59.175
Lianhu District	2016	Xi’an City	.	79.6139		79.6139
Lianhu District	2017	Xi’an City	.	76.6778		76.6778
Lianhu District	2018	Xi’an City	.	63.875		63.875
Lianhu District	2019	Xi’an City	.	.		51.0722
Lianhu District	2020	Xi’an City	.	.		38.2694
Lianhu District	2021	Xi’an City	.	.		25.4667
Lintong District	2012	Xi’an City	39101	75.8739	39101	75.8739
Lintong District	2013	Xi’an City	39256	75.6795	39256	75.6795
Lintong District	2014	Xi’an City	39641	66.9187	39641	66.9187
Lintong District	2015	Xi’an City	39813	55.7569	39813	55.7569
Lintong District	2016	Xi’an City	39949	63.8301	39949	63.8301
Lintong District	2017	Xi’an City	40008	62.6268	40008	62.6268
Lintong District	2018	Xi’an City	40674	53.1384	40674	53.1384
Lintong District	2019	Xi’an City	39222	.	39222	43.65
Lintong District	2020	Xi’an City	46683	.	46683	34.1616
Lintong District	2021	Xi’an City	.	.	54144	24.6732
Gaoling District	2012	Xi’an City	.	77.0687	106535	77.0687
Gaoling District	2013	Xi’an City	.	79.4822	76274	79.4822
Gaoling District	2014	Xi’an City	46013	69.8036	46013	69.8036
Gaoling District	2015	Xi’an City	15752	53.7068	15752	53.7068
Gaoling District	2016	Xi’an City	14005	64.4192	14005	64.4192
Gaoling District	2017	Xi’an City	13885	64.9907	13885	64.9907
Gaoling District	2018	Xi’an City	13297	54.5783	13297	54.5783
Gaoling District	2019	Xi’an City	12802	.	12802	44.1658
Gaoling District	2020	Xi’an City	.	.	12307	33.7534
Gaoling District	2021	Xi’an City	.	.	11812	23.3409
Huyi District	2012	Xi’an City	.	55.3865	43780	55.3865
Huyi District	2013	Xi’an City	.	54.102	41416	54.102
Huyi District	2014	Xi’an City	.	47.577	39052	47.577
Huyi District	2015	Xi’an City	.	42.9356	36688	42.9356
Huyi District	2016	Xi’an City	34324	45.1355	34324	45.1355
Huyi District	2017	Xi’an City	31960	44.8478	31960	44.8478
Huyi District	2018	Xi’an City	31751	39.2082	31751	39.2082
Huyi District	2019	Xi’an City	30730	.	30730	33.5685
Huyi District	2020	Xi’an City	30690	.	30690	27.9289
Huyi District	2021	Xi’an City	.	.	30650	22.2893
Lantian County	2012	Xi’an City	36350	45.6595	36350	45.6595
Lantian County	2013	Xi’an City	36091	44.1644	36091	44.1644
Lantian County	2014	Xi’an City	47017	40.3143	47017	40.3143
Lantian County	2015	Xi’an City	46208	37.564	46208	37.564
Lantian County	2016	Xi’an City	46235	34.6323	46235	34.6323
Lantian County	2017	Xi’an City	46769	33.7864	46769	33.7864
Lantian County	2018	Xi’an City	46737	29.3827	46737	29.3827
Lantian County	2019	Xi’an City	45932	.	45932	24.979
Lantian County	2020	Xi’an City	45668	.	45668	20.5752
Lantian County	2021	Xi’an City	.	.	45404	16.1715
Zhouzhi County	2012	Xi’an City	46965	44.9028	46965	44.9028
Zhouzhi County	2013	Xi’an City	46989	40.8695	46989	40.8695
Zhouzhi County	2014	Xi’an City	33755	37.3729	33755	37.3729
Zhouzhi County	2015	Xi’an City	48221	32.3165	48221	32.3165
Zhouzhi County	2016	Xi’an City	52778	32.7339	52778	32.7339
Zhouzhi County	2017	Xi’an City	52752	30.9729	52752	30.9729
Zhouzhi County	2018	Xi’an City	52774	27.3134	52774	27.3134
Zhouzhi County	2019	Xi’an City	52414	.	52414	23.6539
Zhouzhi County	2020	Xi’an City	52412	.	52412	19.9944
Zhouzhi County	2021	Xi’an City	.	.	52410	16.3349
Yanliang District	2012	Xi’an City	19275	80.0033	19275	80.0033
Yanliang District	2013	Xi’an City	21696	78.6671	21696	78.6671
Yanliang District	2014	Xi’an City	24039	70.7716	24039	70.7716
Yanliang District	2015	Xi’an City	25050	57.2749	25050	57.2749
Yanliang District	2016	Xi’an City	25766	66.4086	25766	66.4086
Yanliang District	2017	Xi’an City	27921	66.2383	27921	66.2383
Yanliang District	2018	Xi’an City	28240	56.8658	28240	56.8658
Yanliang District	2019	Xi’an City	30042	.	30042	47.4934
Yanliang District	2020	Xi’an City	31599	.	31599	38.121
Yanliang District	2021	Xi’an City	.	.	33156	28.7486
Wangyi District	2012	Tongchuan City	1837	46.8897	1837	46.8897
Wangyi District	2013	Tongchuan City	1836	51.7987	1836	51.7987
Wangyi District	2014	Tongchuan City	1834	44.6561	1834	44.6561
Wangyi District	2015	Tongchuan City	1605	39.5774	1605	39.5774
Wangyi District	2016	Tongchuan City	1529	35.8542	1529	35.8542
Wangyi District	2017	Tongchuan City	1526	31.8832	1526	31.8832
Wangyi District	2018	Tongchuan City	1497	29.3419	1497	29.3419
Wangyi District	2019	Tongchuan City	1472	.	1472	26.8006
Wangyi District	2020	Tongchuan City	.	.	1447	24.2594
Wangyi District	2021	Tongchuan City	.	.	1422	21.7181
Yintai District	2012	Tongchuan City	8586	34.6705	8586	34.6705
Yintai District	2013	Tongchuan City	6519	38.9397	6519	38.9397
Yintai District	2014	Tongchuan City	7216	32.8993	7216	32.8993
Yintai District	2015	Tongchuan City	8385	29.355	8385	29.355
Yintai District	2016	Tongchuan City	7861	22.6679	7861	22.6679
Yintai District	2017	Tongchuan City	8131	20.653	8131	20.653
Yintai District	2018	Tongchuan City	7779	20.6449	7779	20.6449
Yintai District	2019	Tongchuan City	8040	.	8040	20.6368
Yintai District	2020	Tongchuan City	.	.	8301	20.6286
Yintai District	2021	Tongchuan City	.	.	8562	20.6205
Yaozhou District	2012	Tongchuan City	29347	40.164	29347	40.164
Yaozhou District	2013	Tongchuan City	30238	42.5337	30238	42.5337
Yaozhou District	2014	Tongchuan City	30320	37.2975	30320	37.2975
Yaozhou District	2015	Tongchuan City	32049	33.0479	32049	33.0479
Yaozhou District	2016	Tongchuan City	31436	29.1797	31436	29.1797
Yaozhou District	2017	Tongchuan City	33047	25.9752	33047	25.9752
Yaozhou District	2018	Tongchuan City	32752	25.4809	32752	25.4809
Yaozhou District	2019	Tongchuan City	27512	.	27512	24.9866
Yaozhou District	2020	Tongchuan City	.	.	22272	24.4923
Yaozhou District	2021	Tongchuan City	.	.	17032	23.998
Yijun County	2012	Tongchuan City	12588	34.2783	12588	34.2783
Yijun County	2013	Tongchuan City	12589	40.414	12589	40.414
Yijun County	2014	Tongchuan City	12559	32.146	12559	32.146
Yijun County	2015	Tongchuan City	12546	29.5339	12546	29.5339
Yijun County	2016	Tongchuan City	12149	25.5476	12149	25.5476
Yijun County	2017	Tongchuan City	12532	24.4288	12532	24.4288
Yijun County	2018	Tongchuan City	12721	24.2933	12721	24.2933
Yijun County	2019	Tongchuan City	11437	.	11437	24.1579
Yijun County	2020	Tongchuan City	.	.	10153	24.0225
Yijun County	2021	Tongchuan City	.	.	8869	23.8871
Weibin District	2012	Baoji City	7224	48.5683	7224	48.5683
Weibin District	2013	Baoji City	7378	44.9241	7378	44.9241
Weibin District	2014	Baoji City	7231	40.5049	7231	40.5049
Weibin District	2015	Baoji City	2072	37.6362	2072	37.6362
Weibin District	2016	Baoji City	5010	38.0124	5010	38.0124
Weibin District	2017	Baoji City	5149	35.1727	5149	35.1727
Weibin District	2018	Baoji City	4676	31.0109	4676	31.0109
Weibin District	2019	Baoji City	4217	.	4217	26.849
Weibin District	2020	Baoji City	.	.	3758	22.6871
Weibin District	2021	Baoji City	.	.	3299	18.5252
Jintai District	2012	Baoji City	6221	62.3551	6221	62.3551
Jintai District	2013	Baoji City	6146	60.7564	6146	60.7564
Jintai District	2014	Baoji City	5431	55.7033	5431	55.7033
Jintai District	2015	Baoji City	5081	50.9274	5081	50.9274
Jintai District	2016	Baoji City	4736	52.4752	4736	52.4752
Jintai District	2017	Baoji City	4781	49.631	4781	49.631
Jintai District	2018	Baoji City	4489	44.5116	4489	44.5116
Jintai District	2019	Baoji City	4489	.	4489	39.3921
Jintai District	2020	Baoji City	.	.	4489	34.2726
Jintai District	2021	Baoji City	.	.	4489	29.1531
Chencang District	2012	Baoji City	31252	50.4775	31252	50.4775
Chencang District	2013	Baoji City	31402	48.5361	31402	48.5361
Chencang District	2014	Baoji City	30721	42.7662	30721	42.7662
Chencang District	2015	Baoji City	31190	39.7566	31190	39.7566
Chencang District	2016	Baoji City	31052	40.9402	31052	40.9402
Chencang District	2017	Baoji City	31731	37.7964	31731	37.7964
Chencang District	2018	Baoji City	32585	33.4607	32585	33.4607
Chencang District	2019	Baoji City	30394	.	30394	29.1249
Chencang District	2020	Baoji City	.	.	28203	24.7891
Chencang District	2021	Baoji City	.	.	26012	20.4534
Fengxiang County	2012	Baoji City	37833	52.4997	37833	52.4997
Fengxiang County	2013	Baoji City	39781	49.7007	39781	49.7007
Fengxiang County	2014	Baoji City	42299	45.8621	42299	45.8621
Fengxiang County	2015	Baoji City	43274	41.2944	43274	41.2944
Fengxiang County	2016	Baoji City	43220	41.7849	43220	41.7849
Fengxiang County	2017	Baoji City	43400	39.0755	43400	39.0755
Fengxiang County	2018	Baoji City	43089	34.5044	43089	34.5044
Fengxiang County	2019	Baoji City	42975	.	42975	29.9333
Fengxiang County	2020	Baoji City	.	.	42861	25.3622
Fengxiang County	2021	Baoji City	.	.	42747	20.7911
Qishan County	2012	Baoji City	22623	60.5973	22623	60.5973
Qishan County	2013	Baoji City	24680	57.5328	24680	57.5328
Qishan County	2014	Baoji City	24571	52.5428	24571	52.5428
Qishan County	2015	Baoji City	24990	48.1931	24990	48.1931
Qishan County	2016	Baoji City	24652	47.7574	24652	47.7574
Qishan County	2017	Baoji City	24404	47.0875	24404	47.0875
Qishan County	2018	Baoji City	24214	41.1097	24214	41.1097
Qishan County	2019	Baoji City	24667	.	24667	35.132
Qishan County	2020	Baoji City	.	.	25120	29.1542
Qishan County	2021	Baoji City	.	.	25573	23.1764
Fufeng County	2012	Baoji City	54736	66.6712	54736	66.6712
Fufeng County	2013	Baoji City	52866	64.6021	52866	64.6021
Fufeng County	2014	Baoji City	50924	58.4702	50924	58.4702
Fufeng County	2015	Baoji City	50504	52.9205	50504	52.9205
Fufeng County	2016	Baoji City	49933	53.8735	49933	53.8735
Fufeng County	2017	Baoji City	48329	53.9076	48329	53.9076
Fufeng County	2018	Baoji City	48616	47.6428	48616	47.6428
Fufeng County	2019	Baoji City	48474	.	48474	41.378
Fufeng County	2020	Baoji City	.	.	48332	35.1133
Fufeng County	2021	Baoji City	.	.	48190	28.8485
Mei County	2012	Baoji City	40480	58.4099	40480	58.4099
Mei County	2013	Baoji City	41394	54.4136	41394	54.4136
Mei County	2014	Baoji City	41974	49.3319	41974	49.3319
Mei County	2015	Baoji City	43974	44.9308	43974	44.9308
Mei County	2016	Baoji City	44025	45.6446	44025	45.6446
Mei County	2017	Baoji City	44096	43.2718	44096	43.2718
Mei County	2018	Baoji City	44556	38.8681	44556	38.8681
Mei County	2019	Baoji City	44641	.	44641	34.4645
Mei County	2020	Baoji City	.	.	44726	30.0609
Mei County	2021	Baoji City	.	.	44811	25.6573
Long County	2012	Baoji City	12711	39.2303	12711	39.2303
Long County	2013	Baoji City	13277	40.0534	13277	40.0534
Long County	2014	Baoji City	13492	34.0574	13492	34.0574
Long County	2015	Baoji City	13609	31.1575	13609	31.1575
Long County	2016	Baoji City	13493	34.2006	13493	34.2006
Long County	2017	Baoji City	14488	28.6898	14488	28.6898
Long County	2018	Baoji City	14520	26.1194	14520	26.1194
Long County	2019	Baoji City	14189	.	14189	23.5491
Long County	2020	Baoji City	.	.	13858	20.9787
Long County	2021	Baoji City	.	.	13527	18.4083
Qianyang County	2012	Baoji City	11709	48.2956	11709	48.2956
Qianyang County	2013	Baoji City	12602	48.8389	12602	48.8389
Qianyang County	2014	Baoji City	12955	42.9703	12955	42.9703
Qianyang County	2015	Baoji City	12551	39.189	12551	39.189
Qianyang County	2016	Baoji City	12363	41.6361	12363	41.6361
Qianyang County	2017	Baoji City	12325	37.4529	12325	37.4529
Qianyang County	2018	Baoji City	11804	33.9423	11804	33.9423
Qianyang County	2019	Baoji City	12448	.	12448	30.4316
Qianyang County	2020	Baoji City	.	.	13092	26.9209
Qianyang County	2021	Baoji City	.	.	13736	23.4103
Linyou County	2012	Baoji City	23197	34.3482	23197	34.3482
Linyou County	2013	Baoji City	23604	32.6308	23604	32.6308
Linyou County	2014	Baoji City	14824	29.0302	14824	29.0302
Linyou County	2015	Baoji City	15242	25.0064	15242	25.0064
Linyou County	2016	Baoji City	14782	26.3949	14782	26.3949
Linyou County	2017	Baoji City	14785	22.1339	14785	22.1339
Linyou County	2018	Baoji City	14800	19.6714	14800	19.6714
Linyou County	2019	Baoji City	14771	.	14771	17.2089
Linyou County	2020	Baoji City	.	.	14742	14.7463
Linyou County	2021	Baoji City	.	.	14713	12.2838
Feng County	2012	Baoji City	5144	31.9064	5144	31.9064
Feng County	2013	Baoji City	5027	29.6506	5027	29.6506
Feng County	2014	Baoji City	5130	25.9101	5130	25.9101
Feng County	2015	Baoji City	5145	20.9519	5145	20.9519
Feng County	2016	Baoji City	5426	22.1934	5426	22.1934
Feng County	2017	Baoji City	5438	19.1832	5438	19.1832
Feng County	2018	Baoji City	5283	16.7423	5283	16.7423
Feng County	2019	Baoji City	6344	.	6344	14.3014
Feng County	2020	Baoji City	.	.	7405	11.8605
Feng County	2021	Baoji City	.	.	8466	9.41963
Taibai County	2012	Baoji City	4522	25.9238	4522	25.9238
Taibai County	2013	Baoji City	4290	23.0461	4290	23.0461
Taibai County	2014	Baoji City	4384	20.2006	4384	20.2006
Taibai County	2015	Baoji City	4200	15.9263	4200	15.9263
Taibai County	2016	Baoji City	4206	16.2164	4206	16.2164
Taibai County	2017	Baoji City	4322	13.3089	4322	13.3089
Taibai County	2018	Baoji City	4226	11.917	4226	11.917
Taibai County	2019	Baoji City	4210	.	4210	10.5252
Taibai County	2020	Baoji City	.	.	4194	9.13341
Taibai County	2021	Baoji City	.	.	4178	7.74159
Qindu District	2012	Xianyang City	15140	79.3772	15140	79.3772
Qindu District	2013	Xianyang City	14189	77.5848	14189	77.5848
Qindu District	2014	Xianyang City	13447	69.702	13447	69.702
Qindu District	2015	Xianyang City	13434	59.5084	13434	59.5084
Qindu District	2016	Xianyang City	13158	71.3608	13158	71.3608
Qindu District	2017	Xianyang City	7863	71.186	7863	71.186
Qindu District	2018	Xianyang City	7483	60.2292	7483	60.2292
Qindu District	2019	Xianyang City	6931	.	6931	49.2724
Qindu District	2020	Xianyang City	.	.	6379	38.3156
Qindu District	2021	Xianyang City	.	.	5827	27.3588
Weicheng District	2012	Xianyang City	10039	77.0604	10039	77.0604
Weicheng District	2013	Xianyang City	9615	76.3547	9615	76.3547
Weicheng District	2014	Xianyang City	8393	68.1906	8393	68.1906
Weicheng District	2015	Xianyang City	9187	54.7392	9187	54.7392
Weicheng District	2016	Xianyang City	8661	68.7921	8661	68.7921
Weicheng District	2017	Xianyang City	.	67.706	8135	67.706
Weicheng District	2018	Xianyang City	.	56.8977	7609	56.8977
Weicheng District	2019	Xianyang City	.	.	7083	46.0894
Weicheng District	2020	Xianyang City	.	.	6557	35.2811
Weicheng District	2021	Xianyang City	.	.	6031	24.4728
Sanyuan County	2012	Xianyang City	32220	73.7324	32220	73.7324
Sanyuan County	2013	Xianyang City	32300	74.9021	32300	74.9021
Sanyuan County	2014	Xianyang City	28160	69.3431	28160	69.3431
Sanyuan County	2015	Xianyang City	29024	55.8947	29024	55.8947
Sanyuan County	2016	Xianyang City	28268	63.2331	28268	63.2331
Sanyuan County	2017	Xianyang City	29175	61.3254	29175	61.3254
Sanyuan County	2018	Xianyang City	28542	52.9408	28542	52.9408
Sanyuan County	2019	Xianyang City	29203	.	29203	44.5563
Sanyuan County	2020	Xianyang City	.	.	29864	36.1718
Sanyuan County	2021	Xianyang City	.	.	30525	27.7873
Jingyang County	2012	Xianyang City	40253	71.027	40253	71.027
Jingyang County	2013	Xianyang City	38800	71.2608	38800	71.2608
Jingyang County	2014	Xianyang City	36610	65.0668	36610	65.0668
Jingyang County	2015	Xianyang City	34150	53.7453	34150	53.7453
Jingyang County	2016	Xianyang City	34772	60.4671	34772	60.4671
Jingyang County	2017	Xianyang City	25168	58.1753	25168	58.1753
Jingyang County	2018	Xianyang City	22190	50.9796	22190	50.9796
Jingyang County	2019	Xianyang City	27248	.	27248	43.7839
Jingyang County	2020	Xianyang City	.	.	32306	36.5882
Jingyang County	2021	Xianyang City	.	.	37364	29.3925
Qian County	2012	Xianyang City	274558	63.7676	274558	63.7676
Qian County	2013	Xianyang City	275625	61.8841	275625	61.8841
Qian County	2014	Xianyang City	90307	58.7462	90307	58.7462
Qian County	2015	Xianyang City	91008	50.231	91008	50.231
Qian County	2016	Xianyang City	91502	50.7749	91502	50.7749
Qian County	2017	Xianyang City	112176	51.799	112176	51.799
Qian County	2018	Xianyang City	111760	44.2338	111760	44.2338
Qian County	2019	Xianyang City	111663	.	111663	36.6686
Qian County	2020	Xianyang City	.	.	111566	29.1035
Qian County	2021	Xianyang City	.	.	111469	21.5383
Liquan County	2012	Xianyang City	92700	61.41	92700	61.41
Liquan County	2013	Xianyang City	110800	61.0831	110800	61.0831
Liquan County	2014	Xianyang City	108311	57.9672	108311	57.9672
Liquan County	2015	Xianyang City	106940	49.7197	106940	49.7197
Liquan County	2016	Xianyang City	98691	51.2726	98691	51.2726
Liquan County	2017	Xianyang City	89582	48.7969	89582	48.7969
Liquan County	2018	Xianyang City	82455	42.274	82455	42.274
Liquan County	2019	Xianyang City	83255	.	83255	35.7511
Liquan County	2020	Xianyang City	.	.	84055	29.2282
Liquan County	2021	Xianyang City	.	.	84855	22.7054
Yongshou County	2012	Xianyang City	24220	44.9743	24220	44.9743
Yongshou County	2013	Xianyang City	29727	45.998	29727	45.998
Yongshou County	2014	Xianyang City	30806	41.7668	30806	41.7668
Yongshou County	2015	Xianyang City	30651	35.1146	30651	35.1146
Yongshou County	2016	Xianyang City	30646	35.9975	30646	35.9975
Yongshou County	2017	Xianyang City	30638	31.9697	30638	31.9697
Yongshou County	2018	Xianyang City	30293	28.1921	30293	28.1921
Yongshou County	2019	Xianyang City	30334	.	30334	24.4144
Yongshou County	2020	Xianyang City	.	.	30375	20.6368
Yongshou County	2021	Xianyang City	.	.	30416	16.8591
Changwu County	2012	Xianyang City	32460	47.1677	32460	47.1677
Changwu County	2013	Xianyang City	34186	50.4326	34186	50.4326
Changwu County	2014	Xianyang City	31389	43.5827	31389	43.5827
Changwu County	2015	Xianyang City	32570	38.969	32570	38.969
Changwu County	2016	Xianyang City	33266	40.7989	33266	40.7989
Changwu County	2017	Xianyang City	33494	37.0267	33494	37.0267
Changwu County	2018	Xianyang City	34064	33.6065	34064	33.6065
Changwu County	2019	Xianyang City	33707	.	33707	30.1863
Changwu County	2020	Xianyang City	.	.	33350	26.7661
Changwu County	2021	Xianyang City	.	.	32993	23.3459
Xunyi County	2012	Xianyang City	33448	29.2654	33448	29.2654
Xunyi County	2013	Xianyang City	28267	33.4341	28267	33.4341
Xunyi County	2014	Xianyang City	33440	27.4712	33440	27.4712
Xunyi County	2015	Xianyang City	33720	24.3391	33720	24.3391
Xunyi County	2016	Xianyang City	32085	21.7686	32085	21.7686
Xunyi County	2017	Xianyang City	30430	18.5977	30430	18.5977
Xunyi County	2018	Xianyang City	30012	20.164	30012	20.164
Xunyi County	2019	Xianyang City	28775	.	28775	21.7304
Xunyi County	2020	Xianyang City	.	.	27538	23.2967
Xunyi County	2021	Xianyang City	.	.	26301	24.863
Chunhua County	2012	Xianyang City	32721	44.9233	32721	44.9233
Chunhua County	2013	Xianyang City	28316	46.4439	28316	46.4439
Chunhua County	2014	Xianyang City	30758	43.9035	30758	43.9035
Chunhua County	2015	Xianyang City	30680	37.1608	30680	37.1608
Chunhua County	2016	Xianyang City	28780	34.1713	28780	34.1713
Chunhua County	2017	Xianyang City	24862	29.3256	24862	29.3256
Chunhua County	2018	Xianyang City	22511	27.8355	22511	27.8355
Chunhua County	2019	Xianyang City	21422	.	21422	26.3454
Chunhua County	2020	Xianyang City	.	.	20333	24.8553
Chunhua County	2021	Xianyang City	.	.	19244	23.3652
Wugong County	2012	Xianyang City	29694	78.7619	29694	78.7619
Wugong County	2013	Xianyang City	28548	75.5878	28548	75.5878
Wugong County	2014	Xianyang City	26703	68.6233	26703	68.6233
Wugong County	2015	Xianyang City	26663	62.3925	26663	62.3925
Wugong County	2016	Xianyang City	26647	65.4754	26647	65.4754
Wugong County	2017	Xianyang City	26629	68.4718	26629	68.4718
Wugong County	2018	Xianyang City	26615	59.5723	26615	59.5723
Wugong County	2019	Xianyang City	26625	.	26625	50.6728
Wugong County	2020	Xianyang City	.	.	26635	41.7733
Wugong County	2021	Xianyang City	.	.	26645	32.8738
Xingping City	2012	Xianyang City	16768	80.5252	16768	80.5252
Xingping City	2013	Xianyang City	16923	78.5811	16923	78.5811
Xingping City	2014	Xianyang City	16927	71.4563	16927	71.4563
Xingping City	2015	Xianyang City	16927	63.2793	16927	63.2793
Xingping City	2016	Xianyang City	16874	70.8962	16874	70.8962
Xingping City	2017	Xianyang City	15058	72.8757	15058	72.8757
Xingping City	2018	Xianyang City	14156	61.1847	14156	61.1847
Xingping City	2019	Xianyang City	15503	.	15503	49.4938
Xingping City	2020	Xianyang City	.	.	16850	37.8028
Xingping City	2021	Xianyang City	.	.	18197	26.1119
Binzhou City	2012	Xianyang City	28474	44.7025	28474	44.7025
Binzhou City	2013	Xianyang City	22427	49.3978	22427	49.3978
Binzhou City	2014	Xianyang City	20626	42.6741	20626	42.6741
Binzhou City	2015	Xianyang City	21516	37.1495	21516	37.1495
Binzhou City	2016	Xianyang City	21564	38.8732	21564	38.8732
Binzhou City	2017	Xianyang City	20010	34.1159	20010	34.1159
Binzhou City	2018	Xianyang City	19286	32.0215	19286	32.0215
Binzhou City	2019	Xianyang City	19372	.	19372	29.9271
Binzhou City	2020	Xianyang City	.	.	19458	27.8326
Binzhou City	2021	Xianyang City	.	.	19544	25.7382
Linwei District	2012	Weinan City	58223	75.8198	58223	75.8198
Linwei District	2013	Weinan City	58292	73.1832	58292	73.1832
Linwei District	2014	Weinan City	67203	65.1616	67203	65.1616
Linwei District	2015	Weinan City	69224	55.9551	69224	55.9551
Linwei District	2016	Weinan City	66943	62.0955	66943	62.0955
Linwei District	2017	Weinan City	67834	59.728	67834	59.728
Linwei District	2018	Weinan City	68075	52.3078	68075	52.3078
Linwei District	2019	Weinan City	61961	.	61961	44.8875
Linwei District	2020	Weinan City	70622	.	70622	37.4673
Linwei District	2021	Weinan City	.	.	79283	30.047
Huazhou District	2012	Weinan City	.	44.6467	26827	44.6467
Huazhou District	2013	Weinan City	.	41.1313	26879	41.1313
Huazhou District	2014	Weinan City	.	37.4618	26931	37.4618
Huazhou District	2015	Weinan City	26983	34.6533	26983	34.6533
Huazhou District	2016	Weinan City	27035	32.1911	27035	32.1911
Huazhou District	2017	Weinan City	27001	30.5686	27001	30.5686
Huazhou District	2018	Weinan City	26968	27.8695	26968	27.8695
Huazhou District	2019	Weinan City	26965	.	26965	25.1704
Huazhou District	2020	Weinan City	26939	.	26939	22.4713
Huazhou District	2021	Weinan City	.	.	26913	19.7722
Tongguan County	2012	Weinan City	10715	60.0265	10715	60.0265
Tongguan County	2013	Weinan City	11839	59.1874	11839	59.1874
Tongguan County	2014	Weinan City	11506	52.2246	11506	52.2246
Tongguan County	2015	Weinan City	11621	44.8386	11621	44.8386
Tongguan County	2016	Weinan City	11619	42.7405	11619	42.7405
Tongguan County	2017	Weinan City	10601	41.3614	10601	41.3614
Tongguan County	2018	Weinan City	9632	37.2149	9632	37.2149
Tongguan County	2019	Weinan City	9374	.	9374	33.0685
Tongguan County	2020	Weinan City	.	.	9116	28.922
Tongguan County	2021	Weinan City	.	.	8858	24.7756
Dali County	2012	Weinan City	71094	81.4532	71094	81.4532
Dali County	2013	Weinan City	74135	77.8019	74135	77.8019
Dali County	2014	Weinan City	82593	69.5218	82593	69.5218
Dali County	2015	Weinan City	87380	57.6022	87380	57.6022
Dali County	2016	Weinan City	92142	62.356	92142	62.356
Dali County	2017	Weinan City	86202	61.8165	86202	61.8165
Dali County	2018	Weinan City	83273	54.65	83273	54.65
Dali County	2019	Weinan City	80019	.	80019	47.4836
Dali County	2020	Weinan City	77814	.	77814	40.3171
Dali County	2021	Weinan City	.	.	75609	33.1507
Heyang County	2012	Weinan City	26725	65.839	26725	65.839
Heyang County	2013	Weinan City	25148	65.3645	25148	65.3645
Heyang County	2014	Weinan City	24909	57.5196	24909	57.5196
Heyang County	2015	Weinan City	24797	51.0702	24797	51.0702
Heyang County	2016	Weinan City	24764	47.4926	24764	47.4926
Heyang County	2017	Weinan City	24695	45.2316	24695	45.2316
Heyang County	2018	Weinan City	24663	40.7782	24663	40.7782
Heyang County	2019	Weinan City	24551	.	24551	36.3248
Heyang County	2020	Weinan City	24464	.	24464	31.8714
Heyang County	2021	Weinan City	.	.	24377	27.418
Chengcheng County	2012	Weinan City	31851	62.7682	31851	62.7682
Chengcheng County	2013	Weinan City	33001	64.0785	33001	64.0785
Chengcheng County	2014	Weinan City	33529	54.7447	33529	54.7447
Chengcheng County	2015	Weinan City	35445	48.8891	35445	48.8891
Chengcheng County	2016	Weinan City	35307	45.6555	35307	45.6555
Chengcheng County	2017	Weinan City	35731	43.043	35731	43.043
Chengcheng County	2018	Weinan City	24863	39.865	24863	39.865
Chengcheng County	2019	Weinan City	23749	.	23749	36.6871
Chengcheng County	2020	Weinan City	23705	.	23705	33.5091
Chengcheng County	2021	Weinan City	.	.	23661	30.3312
Pucheng County	2012	Weinan City	62180	73.8346	62180	73.8346
Pucheng County	2013	Weinan City	62545	71.7322	62545	71.7322
Pucheng County	2014	Weinan City	67727	64.9527	67727	64.9527
Pucheng County	2015	Weinan City	66763	55.1932	66763	55.1932
Pucheng County	2016	Weinan City	66327	56.7033	66327	56.7033
Pucheng County	2017	Weinan City	65320	55.0186	65320	55.0186
Pucheng County	2018	Weinan City	65484	50.7137	65484	50.7137
Pucheng County	2019	Weinan City	60259	.	60259	46.4087
Pucheng County	2020	Weinan City	59838	.	59838	42.1038
Pucheng County	2021	Weinan City	.	.	59417	37.7988
Baishui County	2012	Weinan City	47824	54.9245	47824	54.9245
Baishui County	2013	Weinan City	51325	59.1954	51325	59.1954
Baishui County	2014	Weinan City	53742	49.1299	53742	49.1299
Baishui County	2015	Weinan City	58166	44.7358	58166	44.7358
Baishui County	2016	Weinan City	61610	42.0552	61610	42.0552
Baishui County	2017	Weinan City	64105	39.4239	64105	39.4239
Baishui County	2018	Weinan City	68699	35.7173	68699	35.7173
Baishui County	2019	Weinan City	70849	.	70849	32.0107
Baishui County	2020	Weinan City	69779	.	69779	28.3041
Baishui County	2021	Weinan City	.	.	68709	24.5975
Fuping County	2012	Weinan City	224494	69.106	224494	69.106
Fuping County	2013	Weinan City	234753	69.9168	234753	69.9168
Fuping County	2014	Weinan City	264735	63.4942	264735	63.4942
Fuping County	2015	Weinan City	282832	53.9269	282832	53.9269
Fuping County	2016	Weinan City	300944	56.4493	300944	56.4493
Fuping County	2017	Weinan City	301907	53.9935	301907	53.9935
Fuping County	2018	Weinan City	302084	48.1758	302084	48.1758
Fuping County	2019	Weinan City	57454	.	57454	42.3581
Fuping County	2020	Weinan City	57440	.	57440	36.5404
Fuping County	2021	Weinan City	.	.	57426	30.7226
Hancheng City	2012	Weinan City	17474	55.3695	17474	55.3695
Hancheng City	2013	Weinan City	17547	54.8831	17547	54.8831
Hancheng City	2014	Weinan City	17612	49.5008	17612	49.5008
Hancheng City	2015	Weinan City	17642	46.0969	17642	46.0969
Hancheng City	2016	Weinan City	18124	40.7325	18124	40.7325
Hancheng City	2017	Weinan City	18068	40.1728	18068	40.1728
Hancheng City	2018	Weinan City	18488	37.8368	18488	37.8368
Hancheng City	2019	Weinan City	18010	.	18010	35.5008
Hancheng City	2020	Weinan City	18014	.	18014	33.1648
Hancheng City	2021	Weinan City	.	.	18018	30.8287
Huayin City	2012	Weinan City	5380	57.674	5380	57.6739
Huayin City	2013	Weinan City	5376	54.4741	5376	54.4741
Huayin City	2014	Weinan City	7588	49.632	7588	49.632
Huayin City	2015	Weinan City	7668	43.1476	7668	43.1476
Huayin City	2016	Weinan City	7698	44.1031	7698	44.1031
Huayin City	2017	Weinan City	7699	42.313	7699	42.313
Huayin City	2018	Weinan City	7698	37.082	7698	37.082
Huayin City	2019	Weinan City	7696	.	7696	31.851
Huayin City	2020	Weinan City	7756	.	7756	26.6201
Huayin City	2021	Weinan City	.	.	7816	21.3891
Baota District	2012	Yan’an City	7291	31.0259	7291	31.0259
Baota District	2013	Yan’an City	7275	34.6959	7275	34.6959
Baota District	2014	Yan’an City	7424	25.3561	7424	25.3561
Baota District	2015	Yan’an City	7447	25.9721	7447	25.9721
Baota District	2016	Yan’an City	7373	21.5619	7373	21.5619
Baota District	2017	Yan’an City	7272	20.8428	7272	20.8428
Baota District	2018	Yan’an City	7140	22.3606	7140	22.3606
Baota District	2019	Yan’an City	6810	.	6810	23.8783
Baota District	2020	Yan’an City	.	.	6480	25.396
Baota District	2021	Yan’an City	.	.	6150	26.9137
Ansai District	2012	Yan’an City	.	27.5866	4361	27.5866
Ansai District	2013	Yan’an City	.	28.8396	4531	28.8396
Ansai District	2014	Yan’an City	.	21.1084	4701	21.1084
Ansai District	2015	Yan’an City	.	21.989	4871	21.989
Ansai District	2016	Yan’an City	5041	19.8203	5041	19.8203
Ansai District	2017	Yan’an City	5211	18.9322	5211	18.9322
Ansai District	2018	Yan’an City	5193	19.2944	5193	19.2944
Ansai District	2019	Yan’an City	5091	.	5091	19.6566
Ansai District	2020	Yan’an City	.	.	4989	20.0188
Ansai District	2021	Yan’an City	.	.	4887	20.3811
Yanchang County	2012	Yan’an City	4688	39.8058	4688	39.8058
Yanchang County	2013	Yan’an City	4921	45.496	4921	45.496
Yanchang County	2014	Yan’an City	5166	33.82	5166	33.82
Yanchang County	2015	Yan’an City	5362	33.9016	5362	33.9016
Yanchang County	2016	Yan’an City	5495	29.0388	5495	29.0388
Yanchang County	2017	Yan’an City	5739	28.6174	5739	28.6174
Yanchang County	2018	Yan’an City	6025	28.7553	6025	28.7553
Yanchang County	2019	Yan’an City	6416	.	6416	28.8932
Yanchang County	2020	Yan’an City	.	.	6807	29.0311
Yanchang County	2021	Yan’an City	.	.	7198	29.1689
Yanchuan County	2012	Yan’an City	4060	37.7957	4060	37.7957
Yanchuan County	2013	Yan’an City	4060	41.3078	4060	41.3078
Yanchuan County	2014	Yan’an City	4060	29.7224	4060	29.7224
Yanchuan County	2015	Yan’an City	4060	30.9099	4060	30.9099
Yanchuan County	2016	Yan’an City	4058	26.1449	4058	26.1449
Yanchuan County	2017	Yan’an City	4048	26.7245	4048	26.7245
Yanchuan County	2018	Yan’an City	3820	27.1322	3820	27.1322
Yanchuan County	2019	Yan’an City	5365	.	5365	27.5399
Yanchuan County	2020	Yan’an City	.	.	6910	27.9475
Yanchuan County	2021	Yan’an City	.	.	8455	28.3552
Zichang City	2012	Yan’an City	7526	26.4171	7526	26.4171
Zichang City	2013	Yan’an City	7666	27.8753	7666	27.8753
Zichang City	2014	Yan’an City	8247	19.2369	8247	19.2369
Zichang City	2015	Yan’an City	8379	21.6268	8379	21.6268
Zichang City	2016	Yan’an City	8333	16.7197	8333	16.7197
Zichang City	2017	Yan’an City	3855	16.539	3855	16.539
Zichang City	2018	Yan’an City	3781	18.5856	3781	18.5856
Zichang City	2019	Yan’an City	.	.	3707	20.6322
Zichang City	2020	Yan’an City	.	.	3633	22.6788
Zichang City	2021	Yan’an City	.	.	3559	24.7254
Zhidan County	2012	Yan’an City	2655	26.9612	2655	26.9612
Zhidan County	2013	Yan’an City	2658	28.1443	2658	28.1443
Zhidan County	2014	Yan’an City	2658	21.7143	2658	21.7143
Zhidan County	2015	Yan’an City	2669	21.1077	2669	21.1077
Zhidan County	2016	Yan’an City	2812	20.9495	2812	20.9495
Zhidan County	2017	Yan’an City	2801	17.7834	2801	17.7834
Zhidan County	2018	Yan’an City	3159	18.8455	3159	18.8455
Zhidan County	2019	Yan’an City	4037	.	4037	19.9075
Zhidan County	2020	Yan’an City	.	.	4915	20.9696
Zhidan County	2021	Yan’an City	.	.	5793	22.0316
Wuqi County	2012	Yan’an City	3631	27.2235	3631	27.2235
Wuqi County	2013	Yan’an City	3450	27.8611	3450	27.8611
Wuqi County	2014	Yan’an City	3314	22.2885	3314	22.2885
Wuqi County	2015	Yan’an City	3322	22.0308	3322	22.0308
Wuqi County	2016	Yan’an City	2824	21.8052	2824	21.8052
Wuqi County	2017	Yan’an City	2819	17.9865	2819	17.9865
Wuqi County	2018	Yan’an City	2807	18.234	2807	18.234
Wuqi County	2019	Yan’an City	3359	.	3359	18.4816
Wuqi County	2020	Yan’an City	.	.	3911	18.7291
Wuqi County	2021	Yan’an City	.	.	4463	18.9767
Ganquan County	2012	Yan’an City	3492	32.2212	3492	32.2212
Ganquan County	2013	Yan’an City	3415	34.9286	3415	34.9286
Ganquan County	2014	Yan’an City	3333	26.6377	3333	26.6377
Ganquan County	2015	Yan’an City	3694	26.3492	3694	26.3492
Ganquan County	2016	Yan’an City	3721	25.135	3721	25.135
Ganquan County	2017	Yan’an City	3734	22.9127	3734	22.9127
Ganquan County	2018	Yan’an City	3756	23.2236	3756	23.2236
Ganquan County	2019	Yan’an City	3896	.	3896	23.5345
Ganquan County	2020	Yan’an City	.	.	4036	23.8454
Ganquan County	2021	Yan’an City	.	.	4176	24.1564
Fu County	2012	Yan’an City	11138	35.4589	11138	35.4589
Fu County	2013	Yan’an City	11223	38.8887	11223	38.8887
Fu County	2014	Yan’an City	11897	30.8785	11897	30.8785
Fu County	2015	Yan’an City	11931	29.1479	11931	29.1479
Fu County	2016	Yan’an City	11812	28.1141	11812	28.1141
Fu County	2017	Yan’an City	11140	26.2654	11140	26.2654
Fu County	2018	Yan’an City	10899	26.0558	10899	26.0558
Fu County	2019	Yan’an City	11362	.	11362	25.8461
Fu County	2020	Yan’an City	.	.	11825	25.6364
Fu County	2021	Yan’an City	.	.	12288	25.4267
Luochuan County	2012	Yan’an City	53527	40.2794	53527	40.2794
Luochuan County	2013	Yan’an City	56489	45.4614	56489	45.4614
Luochuan County	2014	Yan’an City	61468	36.7687	61468	36.7687
Luochuan County	2015	Yan’an City	58261	33.5819	58261	33.5819
Luochuan County	2016	Yan’an City	61298	31.9579	61298	31.9579
Luochuan County	2017	Yan’an City	59923	29.6832	59923	29.6832
Luochuan County	2018	Yan’an City	58353	29.0615	58353	29.0615
Luochuan County	2019	Yan’an City	52518	.	52518	28.4397
Luochuan County	2020	Yan’an City	.	.	46683	27.818
Luochuan County	2021	Yan’an City	.	.	40848	27.1963
Yichuan County	2012	Yan’an City	9524	36.6468	9524	36.6468
Yichuan County	2013	Yan’an City	14991	40.5796	14991	40.5796
Yichuan County	2014	Yan’an City	17917	33.7556	17917	33.7556
Yichuan County	2015	Yan’an City	18618	32.0302	18618	32.0302
Yichuan County	2016	Yan’an City	18947	27.5236	18947	27.5236
Yichuan County	2017	Yan’an City	19208	26.7491	19208	26.7491
Yichuan County	2018	Yan’an City	18244	27.1397	18244	27.1397
Yichuan County	2019	Yan’an City	19372	.	19372	27.5302
Yichuan County	2020	Yan’an City	.	.	20500	27.9208
Yichuan County	2021	Yan’an City	.	.	21628	28.3114
Huanglong County	2012	Yan’an City	10226	22.9713	10226	22.9713
Huanglong County	2013	Yan’an City	10059	24.646	10059	24.646
Huanglong County	2014	Yan’an City	10562	20.3731	10562	20.3731
Huanglong County	2015	Yan’an City	10716	18.9954	10716	18.9954
Huanglong County	2016	Yan’an City	10629	12.2685	10629	12.2685
Huanglong County	2017	Yan’an City	11222	12.0132	11222	12.0132
Huanglong County	2018	Yan’an City	10943	13.5243	10943	13.5243
Huanglong County	2019	Yan’an City	10861	.	10861	15.0354
Huanglong County	2020	Yan’an City	.	.	10779	16.5465
Huanglong County	2021	Yan’an City	.	.	10697	18.0576
Huangling County	2012	Yan’an City	9085	35.8338	9085	35.8338
Huangling County	2013	Yan’an City	10805	39.8268	10805	39.8268
Huangling County	2014	Yan’an City	11223	31.7996	11223	31.7996
Huangling County	2015	Yan’an City	11530	28.7548	11530	28.7548
Huangling County	2016	Yan’an City	11396	27.4425	11396	27.4425
Huangling County	2017	Yan’an City	11537	26.5485	11537	26.5485
Huangling County	2018	Yan’an City	11864	25.9521	11864	25.9521
Huangling County	2019	Yan’an City	12005	.	12005	25.3557
Huangling County	2020	Yan’an City	.	.	12146	24.7593
Huangling County	2021	Yan’an City	.	.	12287	24.1629
Hantai District	2012	Hanzhong City	6630	57.186	6630	57.186
Hantai District	2013	Hanzhong City	6694	56.276	6694	56.276
Hantai District	2014	Hanzhong City	8948	48.2951	8948	48.2951
Hantai District	2015	Hanzhong City	8878	40.3409	8878	40.3409
Hantai District	2016	Hanzhong City	12757	42.2764	12757	42.2764
Hantai District	2017	Hanzhong City	12356	41.1143	12356	41.1143
Hantai District	2018	Hanzhong City	11775	36.734	11775	36.734
Hantai District	2019	Hanzhong City	12053	.	12053	32.3536
Hantai District	2020	Hanzhong City	.	.	12331	27.9732
Hantai District	2021	Hanzhong City	.	.	12609	23.5928
Nanzheng District	2012	Hanzhong City	.	35.9594	22951	35.9594
Nanzheng District	2013	Hanzhong City	.	35.3707	21659	35.3707
Nanzheng District	2014	Hanzhong City	.	30.8689	20367	30.8689
Nanzheng District	2015	Hanzhong City	.	24.3186	19075	24.3186
Nanzheng District	2016	Hanzhong City	.	25.0882	17783	25.0882
Nanzheng District	2017	Hanzhong City	16491	23.2218	16491	23.2218
Nanzheng District	2018	Hanzhong City	15199	21.6566	15199	21.6566
Nanzheng District	2019	Hanzhong City	15077	.	15077	20.0914
Nanzheng District	2020	Hanzhong City	.	.	14955	18.5261
Nanzheng District	2021	Hanzhong City	.	.	14833	16.9609
Chenggu County	2012	Hanzhong City	34124	49.9537	34124	49.9537
Chenggu County	2013	Hanzhong City	34435	50.8121	34435	50.8121
Chenggu County	2014	Hanzhong City	37016	43.1623	37016	43.1623
Chenggu County	2015	Hanzhong City	37417	35.7423	37417	35.7423
Chenggu County	2016	Hanzhong City	35241	37.9551	35241	37.9551
Chenggu County	2017	Hanzhong City	34018	35.3924	34018	35.3924
Chenggu County	2018	Hanzhong City	34778	31.9138	34778	31.9138
Chenggu County	2019	Hanzhong City	34465	.	34465	28.4353
Chenggu County	2020	Hanzhong City	.	.	34152	24.9567
Chenggu County	2021	Hanzhong City	.	.	33839	21.4781
Yang County	2012	Hanzhong City	19694	52.558	19694	52.558
Yang County	2013	Hanzhong City	21910	53.5608	21910	53.5608
Yang County	2014	Hanzhong City	23897	45.6273	23897	45.6273
Yang County	2015	Hanzhong City	23273	39.0812	23273	39.0812
Yang County	2016	Hanzhong City	17296	41.1061	17296	41.1061
Yang County	2017	Hanzhong City	17180	37.6603	17180	37.6603
Yang County	2018	Hanzhong City	18822	33.3959	18822	33.3959
Yang County	2019	Hanzhong City	19487	.	19487	29.1315
Yang County	2020	Hanzhong City	19800	.	19800	24.8671
Yang County	2021	Hanzhong City	.	.	20113	20.6027
Xixiang County	2012	Hanzhong City	14175	44.121	14175	44.121
Xixiang County	2013	Hanzhong City	14680	45.6904	14680	45.6904
Xixiang County	2014	Hanzhong City	13607	38.7164	13607	38.7164
Xixiang County	2015	Hanzhong City	13762	32.4015	13762	32.4015
Xixiang County	2016	Hanzhong City	13672	33.0784	13672	33.0784
Xixiang County	2017	Hanzhong City	12926	30.323	12926	30.3229
Xixiang County	2018	Hanzhong City	13037	27.6839	13037	27.6839
Xixiang County	2019	Hanzhong City	11019	.	11019	25.0448
Xixiang County	2020	Hanzhong City	.	.	9001	22.4058
Xixiang County	2021	Hanzhong City	.	.	6983	19.7667
Mian County	2012	Hanzhong City	20464	37.3927	20464	37.3927
Mian County	2013	Hanzhong City	20595	37.2004	20595	37.2004
Mian County	2014	Hanzhong City	21516	32.0376	21516	32.0376
Mian County	2015	Hanzhong City	22150	25.6032	22150	25.6032
Mian County	2016	Hanzhong City	22377	27.5122	22377	27.5122
Mian County	2017	Hanzhong City	22514	24.4701	22514	24.4701
Mian County	2018	Hanzhong City	21792	23.2459	21792	23.2459
Mian County	2019	Hanzhong City	21719	.	21719	22.0216
Mian County	2020	Hanzhong City	.	.	21646	20.7974
Mian County	2021	Hanzhong City	.	.	21573	19.5731
Ningqiang County	2012	Hanzhong City	11787	34.957	11787	34.957
Ningqiang County	2013	Hanzhong City	11907	34.6817	11907	34.6817
Ningqiang County	2014	Hanzhong City	11890	30.7496	11890	30.7496
Ningqiang County	2015	Hanzhong City	11882	23.9853	11882	23.9853
Ningqiang County	2016	Hanzhong City	10162	26.0219	10162	26.0219
Ningqiang County	2017	Hanzhong City	10206	22.669	10206	22.669
Ningqiang County	2018	Hanzhong City	10243	22.2076	10243	22.2076
Ningqiang County	2019	Hanzhong City	10354	.	10354	21.7462
Ningqiang County	2020	Hanzhong City	.	.	10465	21.2848
Ningqiang County	2021	Hanzhong City	.	.	10576	20.8233
Lueyang County	2012	Hanzhong City	3480	33.3314	3480	33.3314
Lueyang County	2013	Hanzhong City	3664	35.9282	3664	35.9282
Lueyang County	2014	Hanzhong City	3642	31.0656	3642	31.0656
Lueyang County	2015	Hanzhong City	3670	24.7281	3670	24.7281
Lueyang County	2016	Hanzhong City	3608	26.3994	3608	26.3994
Lueyang County	2017	Hanzhong City	3577	22.9766	3577	22.9766
Lueyang County	2018	Hanzhong City	3394	21.6941	3394	21.6941
Lueyang County	2019	Hanzhong City	2500	.	2500	20.4115
Lueyang County	2020	Hanzhong City	.	.	1606	19.1289
Lueyang County	2021	Hanzhong City	.	.	712	17.8464
Zhenba County	2012	Hanzhong City	7339	28.0621	7339	28.0621
Zhenba County	2013	Hanzhong City	7701	27.6823	7701	27.6823
Zhenba County	2014	Hanzhong City	7150	26.1062	7150	26.1062
Zhenba County	2015	Hanzhong City	6236	18.9248	6236	18.9248
Zhenba County	2016	Hanzhong City	5331	20.0039	5331	20.0039
Zhenba County	2017	Hanzhong City	5930	17.4811	5930	17.4811
Zhenba County	2018	Hanzhong City	5997	17.1468	5997	17.1468
Zhenba County	2019	Hanzhong City	4704	.	4704	16.8125
Zhenba County	2020	Hanzhong City	.	.	3411	16.4783
Zhenba County	2021	Hanzhong City	.	.	2118	16.144
Liuba County	2012	Hanzhong City	829	32.067	829	32.067
Liuba County	2013	Hanzhong City	829	29.8807	829	29.8807
Liuba County	2014	Hanzhong City	829	25.446	829	25.446
Liuba County	2015	Hanzhong City	827	19.9143	827	19.9143
Liuba County	2016	Hanzhong City	804	22.1808	804	22.1808
Liuba County	2017	Hanzhong City	804	19.3058	804	19.3058
Liuba County	2018	Hanzhong City	474	17.0878	474	17.0878
Liuba County	2019	Hanzhong City	463	.	463	14.8698
Liuba County	2020	Hanzhong City	.	.	452	12.6519
Liuba County	2021	Hanzhong City	.	.	441	10.4339
Foping County	2012	Hanzhong City	536	38.4813	536	38.4813
Foping County	2013	Hanzhong City	521	36.8119	521	36.8119
Foping County	2014	Hanzhong City	561	32.8921	561	32.8921
Foping County	2015	Hanzhong City	615	26.4988	615	26.4988
Foping County	2016	Hanzhong City	603	27.4537	603	27.4537
Foping County	2017	Hanzhong City	609	24.7623	609	24.7623
Foping County	2018	Hanzhong City	604	21.9107	604	21.9107
Foping County	2019	Hanzhong City	620	.	620	23.162
Foping County	2020	Hanzhong City	.	.	636	24.4132
Foping County	2021	Hanzhong City	.	25.6645	652	25.6645
Yuyang District	2012	Yulin City	21406	21.7411	21406	21.7411
Yuyang District	2013	Yulin City	23090	24.2447	23090	24.2447
Yuyang District	2014	Yulin City	23922	19.8464	23922	19.8464
Yuyang District	2015	Yulin City	22877	18.8072	22877	18.8072
Yuyang District	2016	Yulin City	22908	17.0466	22908	17.0466
Yuyang District	2017	Yulin City	22900	17.2724	22900	17.2724
Yuyang District	2018	Yulin City	38100	18.975	38100	18.975
Yuyang District	2019	Yulin City	37707	.	37707	20.6775
Yuyang District	2020	Yulin City	.	.	37314	22.3801
Yuyang District	2021	Yulin City	.	.	36921	24.0826
Hengshan District	2012	Yulin City	14993	26.4698	14993	26.4698
Hengshan District	2013	Yulin City	11842	19.8238	11842	19.8238
Hengshan District	2014	Yulin City	11881	21.0795	11881	21.0795
Hengshan District	2015	Yulin City	11894	18.8862	11894	18.8863
Hengshan District	2016	Yulin City	12026	18.3798	12026	18.3798
Hengshan District	2017	Yulin City	12239	19.9687	12239	19.9687
Hengshan District	2018	Yulin City	12430	.	12430	21.5577
Hengshan District	2019	Yulin City	12488	.	12488	23.1466
Hengshan District	2020	Yulin City	.	.	12546	24.7356
Hengshan District	2021	Yulin City	.	.	12604	26.3245
Fugu County	2012	Yulin City	6104	33.2565	6104	33.2565
Fugu County	2013	Yulin City	6064	34.7843	6064	34.7843
Fugu County	2014	Yulin City	6060	28.3396	6060	28.3396
Fugu County	2015	Yulin City	5570	27.1646	5570	27.1646
Fugu County	2016	Yulin City	7300	24.5469	7300	24.5469
Fugu County	2017	Yulin City	6900	26.2895	6900	26.2895
Fugu County	2018	Yulin City	5861	25.4035	5861	25.4035
Fugu County	2019	Yulin City	5401	.	5401	24.5175
Fugu County	2020	Yulin City	.	.	4941	23.6315
Fugu County	2021	Yulin City	.	.	4481	22.7455
Jingbian County	2012	Yulin City	8791	22.7777	8791	22.7777
Jingbian County	2013	Yulin City	8483	21.6175	8483	21.6175
Jingbian County	2014	Yulin City	8891	15.9825	8891	15.9825
Jingbian County	2015	Yulin City	8590	18.0242	8590	18.0242
Jingbian County	2016	Yulin City	12049	15.9056	12049	15.9056
Jingbian County	2017	Yulin City	16724	13.8514	16724	13.8514
Jingbian County	2018	Yulin City	12100	15.2286	12100	15.2286
Jingbian County	2019	Yulin City	12149	.	12149	16.6058
Jingbian County	2020	Yulin City	.	.	12198	17.983
Jingbian County	2021	Yulin City	.	.	27784	30.1637
Dingbian County	2012	Yulin City	30142	29.1927	30142	29.1927
Dingbian County	2013	Yulin City	32500	28.2216	32500	28.2216
Dingbian County	2014	Yulin City	30184	22.095	30184	22.095
Dingbian County	2015	Yulin City	29881	23.1504	29881	23.1504
Dingbian County	2016	Yulin City	29344	22.1493	29344	22.1493
Dingbian County	2017	Yulin City	34221	18.3373	34221	18.3373
Dingbian County	2018	Yulin City	34226	19.4267	34226	19.4267
Dingbian County	2019	Yulin City	34054	.	34054	20.5162
Dingbian County	2020	Yulin City	.	.	33882	21.6057
Dingbian County	2021	Yulin City	.	.	14772	35.2932
Suide County	2012	Yulin City	14854	35.1611	14854	35.1611
Suide County	2013	Yulin City	14936	35.029	14936	35.029
Suide County	2014	Yulin City	15013	27.9607	15013	27.9607
Suide County	2015	Yulin City	14941	29.9051	14941	29.9051
Suide County	2016	Yulin City	14959	24.7453	14959	24.7453
Suide County	2017	Yulin City	14827	26.3838	14827	26.3838
Suide County	2018	Yulin City	14870	26.4514	14870	26.4514
Suide County	2019	Yulin City	14635	.	14635	26.519
Suide County	2020	Yulin City	.	.	14400	26.5866
Suide County	2021	Yulin City	.	.	4993	26.0017
Mizhi County	2012	Yulin City	5117	28.1695	5117	28.1695
Mizhi County	2013	Yulin City	5241	30.3373	5241	30.3373
Mizhi County	2014	Yulin City	5237	23.7475	5237	23.7475
Mizhi County	2015	Yulin City	5243	25.3741	5243	25.3741
Mizhi County	2016	Yulin City	5244	20.5617	5244	20.5617
Mizhi County	2017	Yulin City	5239	22.5758	5239	22.5758
Mizhi County	2018	Yulin City	5237	23.2061	5237	23.2061
Mizhi County	2019	Yulin City	5284	.	5284	23.8364
Mizhi County	2020	Yulin City	.	.	5331	24.4667
Mizhi County	2021	Yulin City	.	.	33292	26.8741
Jia County	2012	Yulin City	18334	28.991	18334	28.991
Jia County	2013	Yulin City	3376	31.1079	3376	31.1079
Jia County	2014	Yulin City	4091	25.2012	4091	25.2012
Jia County	2015	Yulin City	4160	25.667	4160	25.667
Jia County	2016	Yulin City	3495	22.4242	3495	22.4242
Jia County	2017	Yulin City	3159	24.6368	3159	24.6368
Jia County	2018	Yulin City	3206	24.4564	3206	24.4564
Jia County	2019	Yulin City	3238	.	3238	24.276
Jia County	2020	Yulin City	.	.	3270	24.0957
Jia County	2021	Yulin City	.	.	952	43.0201
Wubu County	2012	Yulin City	954	42.3493	954	42.3493
Wubu County	2013	Yulin City	956	41.6785	956	41.6785
Wubu County	2014	Yulin City	957	34.496	957	34.496
Wubu County	2015	Yulin City	957	34.3437	957	34.3437
Wubu County	2016	Yulin City	931	32.3037	931	32.3037
Wubu County	2017	Yulin City	907	34.0301	907	34.0301
Wubu County	2018	Yulin City	907	32.2991	907	32.2991
Wubu County	2019	Yulin City	906	.	906	30.568
Wubu County	2020	Yulin City	.	.	905	28.8369
Wubu County	2021	Yulin City	.	.	3624	36.1098
Qingjian County	2012	Yulin City	4512	37.2426	4512	37.2426
Qingjian County	2013	Yulin City	5400	38.3754	5400	38.3754
Qingjian County	2014	Yulin City	5207	29.4236	5207	29.4236
Qingjian County	2015	Yulin City	5323	31.4023	5323	31.4023
Qingjian County	2016	Yulin City	5327	25.5525	5327	25.5525
Qingjian County	2017	Yulin City	5328	26.9476	5328	26.9476
Qingjian County	2018	Yulin City	5066	27.1037	5066	27.1037
Qingjian County	2019	Yulin City	5069	.	5069	27.2597
Qingjian County	2020	Yulin City	.	.	5072	27.4157
Qingjian County	2021	Yulin City	.	.	14401	26.6726
Zizhou County	2012	Yulin City	14364	28.1591	14364	28.1591
Zizhou County	2013	Yulin City	14327	29.6456	14327	29.6456
Zizhou County	2014	Yulin City	14343	21.8047	14343	21.8047
Zizhou County	2015	Yulin City	14342	24.5712	14342	24.5712
Zizhou County	2016	Yulin City	14497	20.0478	14497	20.0478
Zizhou County	2017	Yulin City	14571	20.5654	14571	20.5654
Zizhou County	2018	Yulin City	14482	22.7186	14482	22.7186
Zizhou County	2019	Yulin City	14449	.	14449	24.8719
Zizhou County	2020	Yulin City	.	.	14416	27.0252
Zizhou County	2021	Yulin City	.	.	9254	26.4532
Shenmu City	2012	Yulin City	.	27.5685	9020	27.5685
Shenmu City	2013	Yulin City	.	28.6839	8786	28.6839
Shenmu City	2014	Yulin City	.	23.9101	8552	23.9101
Shenmu City	2015	Yulin City	.	22.642	8318	22.642
Shenmu City	2016	Yulin City	.	20.2388	8084	20.2388
Shenmu City	2017	Yulin City	7850	21.6898	7850	21.6898
Shenmu City	2018	Yulin City	7616	22.4849	7616	22.4849
Shenmu City	2019	Yulin City	12438	.	12438	23.2801
Shenmu City	2020	Yulin City	.	.	17260	24.0753
Shenmu City	2021	Yulin City	.	.	50545	39.4079
Hanbin District	2012	Ankang City	49910	42.4777	49910	42.4777
Hanbin District	2013	Ankang City	49275	45.5474	49275	45.5474
Hanbin District	2014	Ankang City	48469	40.969	48469	40.969
Hanbin District	2015	Ankang City	50444	34.0474	50444	34.0474
Hanbin District	2016	Ankang City	50841	35.4906	50841	35.4906
Hanbin District	2017	Ankang City	52155	33.056	52155	33.056
Hanbin District	2018	Ankang City	51051	30.5877	51051	30.5877
Hanbin District	2019	Ankang City	48270	.	48270	28.1193
.	2020	Ankang City	.	.	45489	25.6509
.	2021	Ankang City	.	.	11116	43.9732
Hanyin County	2012	Ankang City	11086	46.4147	11086	46.4147
Hanyin County	2013	Ankang City	11056	48.8561	11056	48.8561
Hanyin County	2014	Ankang City	10967	43.3125	10967	43.3125
Hanyin County	2015	Ankang City	11070	35.5377	11070	35.5377
Hanyin County	2016	Ankang City	10868	36.8542	10868	36.8542
Hanyin County	2017	Ankang City	10729	33.8294	10729	33.8294
Hanyin County	2018	Ankang City	10730	32.1295	10730	32.1295
Hanyin County	2019	Ankang City	10216	.	10216	30.4297
Hanyin County	2020	Ankang City	.	.	9702	28.7298
Hanyin County	2021	Ankang City	.	.	5222	48.7355
Shiquan County	2012	Ankang City	5514	52.7041	5514	52.7041
Shiquan County	2013	Ankang City	5806	56.6727	5806	56.6727
Shiquan County	2014	Ankang City	5538	49.1335	5538	49.1335
Shiquan County	2015	Ankang City	5466	40.5217	5466	40.5217
Shiquan County	2016	Ankang City	5202	42.5217	5202	42.5217
Shiquan County	2017	Ankang City	4835	38.9446	4835	38.9446
Shiquan County	2018	Ankang City	4771	36.1625	4771	36.1625
Shiquan County	2019	Ankang City	4613	.	4613	33.3804
Shiquan County	2020	Ankang City	.	.	4455	30.5983
Shiquan County	2021	Ankang City	.	.	437	32.1595
Ningshan County	2012	Ankang City	393	31.3047	393	31.3047
Ningshan County	2013	Ankang City	349	30.4499	349	30.4499
Ningshan County	2014	Ankang City	348	27.1874	348	27.1874
Ningshan County	2015	Ankang City	345	22.6626	345	22.6626
Ningshan County	2016	Ankang City	345	20.0598	345	20.0598
Ningshan County	2017	Ankang City	344	19.1096	344	19.1096
Ningshan County	2018	Ankang City	340	17.749	340	17.749
Ningshan County	2019	Ankang City	334	.	334	16.3884
Ningshan County	2020	Ankang City	339	.	339	15.0279
Ningshan County	2021	Ankang City	.	.	5204	34.5725
Ziyang County	2012	Ankang City	5204	35.7751	5204	35.7751
Ziyang County	2013	Ankang City	5204	36.9777	5204	36.9777
Ziyang County	2014	Ankang City	5153	34.1914	5153	34.1914
Ziyang County	2015	Ankang City	5126	27.7316	5126	27.7316
Ziyang County	2016	Ankang City	4919	29.1481	4919	29.1481
Ziyang County	2017	Ankang City	4726	26.3088	4726	26.3088
Ziyang County	2018	Ankang City	5100	24.8783	5100	24.8783
Ziyang County	2019	Ankang City	3748	.	3748	23.4477
Ziyang County	2020	Ankang City	.	.	2396	22.0172
Ziyang County	2021	Ankang City	.	.	5451	26.4703
Langao County	2012	Ankang City	5064	26.092	5064	26.092
Langao County	2013	Ankang City	4677	25.7138	4677	25.7138
Langao County	2014	Ankang City	4654	23.2995	4654	23.2995
Langao County	2015	Ankang City	4809	19.6873	4809	19.6873
Langao County	2016	Ankang City	4629	19.5067	4629	19.5067
Langao County	2017	Ankang City	4415	17.2164	4415	17.2164
Langao County	2018	Ankang City	4365	16.6383	4365	16.6383
Langao County	2019	Ankang City	4157	.	4157	16.0602
Langao County	2020	Ankang City	.	.	3949	15.4822
Langao County	2021	Ankang City	.	.	4626	27.9186
Pingli County	2012	Ankang City	4649	29.1651	4649	29.1651
Pingli County	2013	Ankang City	4672	30.4116	4672	30.4116
Pingli County	2014	Ankang City	4789	26.9421	4789	26.9421
Pingli County	2015	Ankang City	4783	23.0317	4783	23.0317
Pingli County	2016	Ankang City	4518	22.9596	4518	22.9596
Pingli County	2017	Ankang City	4387	20.8372	4387	20.8372
Pingli County	2018	Ankang City	4377	19.4165	4377	19.4165
Pingli County	2019	Ankang City	4089	.	4089	17.9959
Pingli County	2020	Ankang City	3936	.	3936	16.5752
Pingli County	2021	Ankang City	.	.	1133	23.9365
Zhenping County	2012	Ankang City	1277	21.6546	1277	21.6546
Zhenping County	2013	Ankang City	1421	19.3727	1421	19.3727
Zhenping County	2014	Ankang City	1398	16.1593	1398	16.1593
Zhenping County	2015	Ankang City	1399	13.5315	1399	13.5315
Zhenping County	2016	Ankang City	1383	13.4282	1383	13.4282
Zhenping County	2017	Ankang City	1352	12.0153	1352	12.0153
Zhenping County	2018	Ankang City	1328	10.7976	1328	10.7976
Zhenping County	2019	Ankang City	1317	.	1317	9.58001
Zhenping County	2020	Ankang City	.	.	1306	8.36239
Zhenping County	2021	Ankang City	.	.	23910	32.4675
Xunyang County	2012	Ankang City	23823	37.0773	23823	37.0773
Xunyang County	2013	Ankang City	23736	41.687	23736	41.687
Xunyang County	2014	Ankang City	24555	36.4712	24555	36.4712
Xunyang County	2015	Ankang City	23448	31.4155	23448	31.4155
Xunyang County	2016	Ankang City	23326	31.2101	23326	31.2101
Xunyang County	2017	Ankang City	22859	29.076	22859	29.076
Xunyang County	2018	Ankang City	22732	26.789	22732	26.789
Xunyang County	2019	Ankang City	22724	.	22724	24.502
Xunyang County	2020	Ankang City	.	.	22716	22.215
Xunyang County	2021	Ankang City	.	.	7947	29.5466
Baihe County	2012	Ankang City	6973	34.7129	6973	34.7129
Baihe County	2013	Ankang City	5999	39.8792	5999	39.8792
Baihe County	2014	Ankang City	5873	34.1756	5873	34.1756
Baihe County	2015	Ankang City	5817	30.0917	5817	30.0917
Baihe County	2016	Ankang City	6106	28.8297	6106	28.8297
Baihe County	2017	Ankang City	5865	27.4334	5865	27.4334
Baihe County	2018	Ankang City	5644	25.7356	5644	25.7356
Baihe County	2019	Ankang City	5538	.	5538	24.0377
Baihe County	2020	Ankang City	.	.	5432	22.3399
Baihe County	2021	Ankang City	.	.	15855	40.8671
Shangzhou District	2012	Shangluo City	11427	40.0253	11427	40.0253
Shangzhou District	2013	Shangluo City	6999	39.1834	6999	39.1834
Shangzhou District	2014	Shangluo City	6582	34.242	6582	34.242
Shangzhou District	2015	Shangluo City	6055	33.0343	6055	33.0343
Shangzhou District	2016	Shangluo City	9776	29.6562	9776	29.6562
Shangzhou District	2017	Shangluo City	8660	29.9714	8660	29.9714
Shangzhou District	2018	Shangluo City	7731	26.8141	7731	26.8141
Shangzhou District	2019	Shangluo City	6902	.	6902	23.6567
Shangzhou District	2020	Shangluo City	.	.	6073	20.4994
Shangzhou District	2021	Shangluo City	.	.	16317	38.5624
Luonan County	2012	Shangluo City	17234	37.6619	17234	37.6619
Luonan County	2013	Shangluo City	18151	36.7615	18151	36.7615
Luonan County	2014	Shangluo City	18407	31.4306	18407	31.4306
Luonan County	2015	Shangluo City	17832	30.2705	17832	30.2705
Luonan County	2016	Shangluo City	17683	24.4928	17683	24.4928
Luonan County	2017	Shangluo City	16908	24.8978	16908	24.8978
Luonan County	2018	Shangluo City	16790	22.9606	16790	22.9606
Luonan County	2019	Shangluo City	14400	.	14400	21.0235
Luonan County	2020	Shangluo City	.	.	12010	19.0863
Luonan County	2021	Shangluo City	.	.	5689	36.1868
Danfeng County	2012	Shangluo City	5709	39.2762	5709	39.2762
Danfeng County	2013	Shangluo City	5729	42.3657	5729	42.3657
Danfeng County	2014	Shangluo City	5542	34.6254	5542	34.6254
Danfeng County	2015	Shangluo City	5374	32.5795	5374	32.5795
Danfeng County	2016	Shangluo City	5307	29.5123	5307	29.5123
Danfeng County	2017	Shangluo City	5219	29.864	5219	29.864
Danfeng County	2018	Shangluo City	5166	28.5236	5166	28.5236
Danfeng County	2019	Shangluo City	5220	.	5220	27.1833
Danfeng County	2020	Shangluo City	.	.	5274	25.8429
Danfeng County	2021	Shangluo City	.	.	5249	33.2543
Shangnan County	2012	Shangluo City	5307	39.2278	5307	39.2278
Shangnan County	2013	Shangluo City	5365	45.2012	5365	45.2012
Shangnan County	2014	Shangluo City	5294	35.9194	5294	35.9194
Shangnan County	2015	Shangluo City	5070	34.0739	5070	34.0739
Shangnan County	2016	Shangluo City	5038	30.7963	5038	30.7963
Shangnan County	2017	Shangluo City	4952	30.935	4952	30.935
Shangnan County	2018	Shangluo City	4855	29.307	4855	29.307
Shangnan County	2019	Shangluo City	4492	.	4492	27.679
Shangnan County	2020	Shangluo City	.	.	4129	26.0511
Shangnan County	2021	Shangluo City	.	.	8859	31.4187
Shanyang County	2012	Shangluo City	8830	34.3256	8830	34.3256
Shanyang County	2013	Shangluo City	8801	37.2325	8801	37.2325
Shanyang County	2014	Shangluo City	8853	30.9143	8853	30.9143
Shanyang County	2015	Shangluo City	8864	28.8955	8864	28.8955
Shanyang County	2016	Shangluo City	8817	26.9038	8817	26.9038
Shanyang County	2017	Shangluo City	8965	26.9917	8965	26.9917
Shanyang County	2018	Shangluo City	8538	24.1909	8538	24.1909
Shanyang County	2019	Shangluo City	8218	.	8218	21.39
Shanyang County	2020	Shangluo City	8066	.	8066	18.5891
Shanyang County	2021	Shangluo City	.	.	8299	37.6435
Zhen’an County	2012	Shangluo City	8477	38.1837	8477	38.1837
Zhen’an County	2013	Shangluo City	8655	38.7239	8655	38.7239
Zhen’an County	2014	Shangluo City	8638	34.6344	8638	34.6344
Zhen’an County	2015	Shangluo City	8127	30.5778	8127	30.5778
Zhen’an County	2016	Shangluo City	8240	29.6922	8240	29.6922
Zhen’an County	2017	Shangluo City	8122	29.0907	8122	29.0907
Zhen’an County	2018	Shangluo City	8185	25.7172	8185	25.7172
Zhen’an County	2019	Shangluo City	7981	.	7981	22.3437
Zhen’an County	2020	Shangluo City	8103	.	8103	18.9702
Zhen’an County	2021	Shangluo City	.	.	5084	30.9863
Zhashui County	2012	Shangluo City	5183	30.1044	5183	30.1044
Zhashui County	2013	Shangluo City	5282	29.2226	5282	29.2226
Zhashui County	2014	Shangluo City	4904	26.6789	4904	26.6789
Zhashui County	2015	Shangluo City	4712	25.0206	4712	25.0206
Zhashui County	2016	Shangluo City	4694	21.1611	4694	21.1611
Zhashui County	2017	Shangluo City	4504	21.1306	4504	21.1306
Zhashui County	2018	Shangluo City	4510	19.6282	4510	19.6282
Zhashui County	2019	Shangluo City	4430	.	4430	18.1257
Zhashui County	2020	Shangluo City	.	.	4350	16.6232
Zhashui County	2021	Shangluo City	.	.

## Sheet: Economic Benefits (B4)
County/District	Year	City	Gross Regional Product(million yuan)	Per capital disposable income of rural resIDents(Yuan)	Value added of primary industry(million yuan)	b41x	b42x	b43x
Chang’an District	2012	Xi’an City	3626400	11107	300600	3626400	11107	300600
Chang’an District	2013	Xi’an City	3691460	12695	317573	3691460	12695	317573
Chang’an District	2014	Xi’an City	4206958	14206	336650	4206958	14206	336650
Chang’an District	2015	Xi’an City	5126913	15486	365213	5126913	15486	365213
Chang’an District	2016	Xi’an City	6080200	16741	384713	6080200	16741	384713
Chang’an District	2017	Xi’an City	7910300	.	339487	7910300	17996	339487
Chang’an District	2018	Xi’an City	9091100	.	268900	9091100	19251	268900
Chang’an District	2019	Xi’an City	10012100	.	287300	10012100	20506	287300
Chang’an District	2020	Xi’an City	11362500	.	327600	11362500	21761	327600
Chang’an District	2021	Xi’an City	12694500	.	342200	12694500	23016	342200
Baqiao District	2012	Xi’an City	2333000	13278	.	2333000	13278
Baqiao District	2013	Xi’an City	2690300	15203	.	2690300	15203
Baqiao District	2014	Xi’an City	2933000	16982	.	2933000	16982
Baqiao District	2015	Xi’an City	3322800	18891	.	3322800	18891
Baqiao District	2016	Xi’an City	3297800	20431	.	3297800	20431
Baqiao District	2017	Xi’an City	4283500	.	.	4283500	21971
Baqiao District	2018	Xi’an City	4807800	.	.	4807800	23511
Baqiao District	2019	Xi’an City	4891900	.	.	4891900	25051
Baqiao District	2020	Xi’an City	5420600	.	.	5420600	26591
Baqiao District	2021	Xi’an City	.	.	.	5949300	28131
Yanta District	2012	Xi’an City	8108300	14800	.	8108300	14800
Yanta District	2013	Xi’an City	9387500	16724	.	9387500	16724
Yanta District	2014	Xi’an City	10661500	.	.	10661500	18648
Yanta District	2015	Xi’an City	11582300	.	.	11582300	20572
Yanta District	2016	Xi’an City	12354300	.	.	12354300	22496
Yanta District	2017	Xi’an City	15211500	.	.	15211500	24420
Yanta District	2018	Xi’an City	17579800	.	.	17579800	26344
Yanta District	2019	Xi’an City	22710100	.	.	22710100	28268
Yanta District	2020	Xi’an City	25107200	.	.	25107200	30192
Yanta District	2021	Xi’an City	.	.	.	27504300	32116
Weiyang District	2012	Xi’an City	5167300	14562	.	5167300	14562
Weiyang District	2013	Xi’an City	6010900	16455	.	6010900	16455
Weiyang District	2014	Xi’an City	6752000	18364	.	6752000	18364
Weiyang District	2015	Xi’an City	7252100	19824	.	7252100	19824
Weiyang District	2016	Xi’an City	7728800	21294	.	7728800	21294
Weiyang District	2017	Xi’an City	8445300	.	.	8445300	22764
Weiyang District	2018	Xi’an City	9648300	.	.	9648300	24234
Weiyang District	2019	Xi’an City	12550700	.	.	12550700	25704
Weiyang District	2020	Xi’an City	13194300	.	.	13194300	27174
Weiyang District	2021	Xi’an City	.	.	.	13837900	28644
Beilin District	2012	Xi’an City	5042800	.	.	5042800
Beilin District	2013	Xi’an City	5257600	.	.	5257600
Beilin District	2014	Xi’an City	5917200	.	.	5917200
Beilin District	2015	Xi’an City	6766500	.	.	6766500
Beilin District	2016	Xi’an City	7416800	.	.	7416800
Beilin District	2017	Xi’an City	8734900	.	.	8734900
Beilin District	2018	Xi’an City	9652600	.	.	9652600
Beilin District	2019	Xi’an City	10139700	.	.	10139700
Beilin District	2020	Xi’an City	10604700	.	.	10604700
Beilin District	2021	Xi’an City	.	.	.	11069700
Xincheng District	2012	Xi’an City	4302200	.	.	4302200
Xincheng District	2013	Xi’an City	4717500	.	.	4717500
Xincheng District	2014	Xi’an City	5060500	.	.	5060500
Xincheng District	2015	Xi’an City	5041200	.	.	5041200
Xincheng District	2016	Xi’an City	5406600	.	.	5406600
Xincheng District	2017	Xi’an City	6161000	.	.	6161000
Xincheng District	2018	Xi’an City	6506400	.	.	6506400
Xincheng District	2019	Xi’an City	6059300	.	.	6059300
Xincheng District	2020	Xi’an City	5790500	.	.	5790500
Xincheng District	2021	Xi’an City	.	.	.	5521700
Lianhu District	2012	Xi’an City	4794000	.	.	4794000
Lianhu District	2013	Xi’an City	5266800	.	.	5266800
Lianhu District	2014	Xi’an City	5525300	.	.	5525300
Lianhu District	2015	Xi’an City	5764100	.	.	5764100
Lianhu District	2016	Xi’an City	6219100	.	.	6219100
Lianhu District	2017	Xi’an City	7494700	.	.	7494700
Lianhu District	2018	Xi’an City	8207300	.	.	8207300
Lianhu District	2019	Xi’an City	7890500	.	.	7890500
Lianhu District	2020	Xi’an City	8149500	.	.	8149500
Lianhu District	2021	Xi’an City	.	.	.	8408500
Lintong District	2012	Xi’an City	2115300	10685	.	2115300	10685
Lintong District	2013	Xi’an City	2265800	12160	.	2265800	12160
Lintong District	2014	Xi’an City	2314500	13595	.	2314500	13595
Lintong District	2015	Xi’an City	1923400	15164	.	1923400	15164
Lintong District	2016	Xi’an City	1831100	16389	.	1831100	16389
Lintong District	2017	Xi’an City	2210100	.	.	2210100	17614
Lintong District	2018	Xi’an City	2375200	.	.	2375200	18839
Lintong District	2019	Xi’an City	2426900	.	.	2426900	20064
Lintong District	2020	Xi’an City	2525300	.	.	2525300	21289
Lintong District	2021	Xi’an City	.	.	.	2623700	22514
Gaoling District	2012	Xi’an City	2281600	10673	203300	2281600	10673	203300
Gaoling District	2013	Xi’an City	2799400	12167	221207	2799400	12167	221207
Gaoling District	2014	Xi’an City	3000900	13615	259555	3000900	13615	259555
Gaoling District	2015	Xi’an City	2914000	15191	276959	2914000	15191	276959
Gaoling District	2016	Xi’an City	3002400	16431	285152	3002400	16431	285152
Gaoling District	2017	Xi’an City	3771000	.	326200	3771000	17671	326200
Gaoling District	2018	Xi’an City	3784500	.	249900	3784500	18911	249900
Gaoling District	2019	Xi’an City	3744400	.	271900	3744400	20151	271900
Gaoling District	2020	Xi’an City	3744900	.	308400	3744900	21391	308400
Gaoling District	2021	Xi’an City	3847200	.	318000	3847200	22631	318000
Huyi District	2012	Xi’an City	1421300	9654	253700	1421300	9654	253700
Huyi District	2013	Xi’an City	1552400	10899	253187	1552400	10899	253187
Huyi District	2014	Xi’an City	1619600	12218	271973	1619600	12218	271973
Huyi District	2015	Xi’an City	1508400	13616	275729	1508400	13616	275729
Huyi District	2016	Xi’an City	1628200	14638	285963	1628200	14638	285963
Huyi District	2017	Xi’an City	1974100	.	277412	1974100	15660	277412
Huyi District	2018	Xi’an City	2172600	.	256500	2172600	16682	256500
Huyi District	2019	Xi’an City	1802300	.	277100	1802300	17704	277100
Huyi District	2020	Xi’an City	2336100	.	311000	2336100	18726	311000
Huyi District	2021	Xi’an City	2660500	.	319800	2660500	19748	319800
Lantian County	2012	Xi’an City	957300	7824	244500	957300	7824	244500
Lantian County	2013	Xi’an City	1068900	8833	244555	1068900	8833	244555
Lantian County	2014	Xi’an City	1184500	9911	259058	1184500	9911	259058
Lantian County	2015	Xi’an City	1130800	11084	260100	1130800	11084	260100
Lantian County	2016	Xi’an City	1224400	12082	275900	1224400	12082	275900
Lantian County	2017	Xi’an City	1434900	.	301500	1434900	13080	301500
Lantian County	2018	Xi’an City	1578300	.	316600	1578300	14078	316600
Lantian County	2019	Xi’an City	1492300	.	283500	1492300	15076	283500
Lantian County	2020	Xi’an City	1429600	.	323800	1429600	16074	323800
Lantian County	2021	Xi’an City	1517000	.	330900	1517000	17072	330900
Zhouzhi County	2012	Xi’an City	782800	7733	253940	782800	7733	253940
Zhouzhi County	2013	Xi’an City	876600	8870	263370	876600	8870	263370
Zhouzhi County	2014	Xi’an City	972000	9961	276272	972000	9961	276272
Zhouzhi County	2015	Xi’an City	1040600	11148	295400	1040600	11148	295400
Zhouzhi County	2016	Xi’an City	1149900	12207	331700	1149900	12207	331700
Zhouzhi County	2017	Xi’an City	1342600	.	339100	1342600	13266	339100
Zhouzhi County	2018	Xi’an City	1462700	.	329400	1462700	14325	329400
Zhouzhi County	2019	Xi’an City	1371500	.	358800	1371500	15384	358800
Zhouzhi County	2020	Xi’an City	1394400	.	403900	1394400	16443	403900
Zhouzhi County	2021	Xi’an City	1463900	.	422400	1463900	17502	422400
Yanliang District	2012	Xi’an City	1414900	13403	.	1414900	13403
Yanliang District	2013	Xi’an City	1689600	15212	.	1689600	15212
Yanliang District	2014	Xi’an City	1947200	17007	.	1947200	17007
Yanliang District	2015	Xi’an City	1918500	18850	.	1918500	18850
Yanliang District	2016	Xi’an City	1939400	20262	.	1939400	20262
Yanliang District	2017	Xi’an City	2402100	.	.	2402100	21674
Yanliang District	2018	Xi’an City	2501000	.	.	2501000	23086
Yanliang District	2019	Xi’an City	2550600	.	.	2550600	24498
Yanliang District	2020	Xi’an City	2491000	.	.	2491000	25910
Yanliang District	2021	Xi’an City	.	.	.	2431400	27322
Wangyi District	2012	Tongchuan City	641200	8068	.	641200	8068
Wangyi District	2013	Tongchuan City	731700	9189	.	731700	9189
Wangyi District	2014	Tongchuan City	821600	10398	.	821600	10398
Wangyi District	2015	Tongchuan City	838800	8499	.	838800	8499
Wangyi District	2016	Tongchuan City	877400	9201	.	877400	9201
Wangyi District	2017	Tongchuan City	1002300	.	.	1002300	9903
Wangyi District	2018	Tongchuan City	872400	.	.	872400	10605
Wangyi District	2019	Tongchuan City	848200	.	.	848200	11307
Wangyi District	2020	Tongchuan City	927500	.	.	927500	12009
Wangyi District	2021	Tongchuan City	.	.	.	1006800	12711
Yintai District	2012	Tongchuan City	700200	6863	.	700200	6863
Yintai District	2013	Tongchuan City	822600	7879	.	822600	7879
Yintai District	2014	Tongchuan City	779400	8934	.	779400	8934
Yintai District	2015	Tongchuan City	660300	8175	.	660300	8175
Yintai District	2016	Tongchuan City	632600	8919	.	632600	8919
Yintai District	2017	Tongchuan City	643400	.	.	643400	9663
Yintai District	2018	Tongchuan City	767500	.	.	767500	10407
Yintai District	2019	Tongchuan City	617500	.	.	617500	11151
Yintai District	2020	Tongchuan City	631600	.	.	631600	11895
Yintai District	2021	Tongchuan City	.	.	.	645700	12639
Yaozhou District	2012	Tongchuan City	1275600	7975	89020	1275600	7975	89020
Yaozhou District	2013	Tongchuan City	1407100	9099	96098	1407100	9099	96098
Yaozhou District	2014	Tongchuan City	1507800	10227	104245	1507800	10227	104245
Yaozhou District	2015	Tongchuan City	1421100	9386	104506	1421100	9386	104506
Yaozhou District	2016	Tongchuan City	1275000	10181	110008	1275000	10181	110008
Yaozhou District	2017	Tongchuan City	1459800	.	113186	1459800	10976	113186
Yaozhou District	2018	Tongchuan City	1333890	.	136630	1333890	11771	136630
Yaozhou District	2019	Tongchuan City	1749100	.	149000	1749100	12566	149000
Yaozhou District	2020	Tongchuan City	1897558	.	171267	1897558	13361	171267
Yaozhou District	2021	Tongchuan City	2160840	.	184875	2160840	14156	184875
Yijun County	2012	Tongchuan City	212100	6477	52817	212100	6477	52817
Yijun County	2013	Tongchuan City	258400	7423	56623	258400	7423	56623
Yijun County	2014	Tongchuan City	295400	8417	61317	295400	8417	61317
Yijun County	2015	Tongchuan City	325300	7888	60247	325300	7888	60247
Yijun County	2016	Tongchuan City	331100	8547	63271	331100	8547	63271
Yijun County	2017	Tongchuan City	380500	.	64710	380500	9206	64710
Yijun County	2018	Tongchuan City	305630	.	59740	305630	9865	59740
Yijun County	2019	Tongchuan City	331865	.	62721	331865	10524	62721
Yijun County	2020	Tongchuan City	360810	.	71530	360810	11183	71530
Yijun County	2021	Tongchuan City	427400	.	79900	427400	11842	79900
Weibin District	2012	Baoji City	4071600	10208	.	4071600	10208
Weibin District	2013	Baoji City	4272500	11596	.	4272500	11596
Weibin District	2014	Baoji City	4457000	13069	.	4457000	13069
Weibin District	2015	Baoji City	4699600	11587	.	4699600	11587
Weibin District	2016	Baoji City	5005000	12514	.	5005000	12514
Weibin District	2017	Baoji City	5311700	.	.	5311700	13441
Weibin District	2018	Baoji City	5463000	.	.	5463000	14368
Weibin District	2019	Baoji City	5211400	.	.	5211400	15295
Weibin District	2020	Baoji City	5353900	.	.	5353900	16222
Weibin District	2021	Baoji City	.	.	.	5496400	17149
Jintai District	2012	Baoji City	2412500	9290	.	2412500	9290
Jintai District	2013	Baoji City	2757300	10581	.	2757300	10581
Jintai District	2014	Baoji City	2954500	11883	.	2954500	11883
Jintai District	2015	Baoji City	3042300	10523	.	3042300	10523
Jintai District	2016	Baoji City	3385000	11365	.	3385000	11365
Jintai District	2017	Baoji City	3578100	.	.	3578100	12207
Jintai District	2018	Baoji City	3706500	.	.	3706500	13049
Jintai District	2019	Baoji City	3649500	.	.	3649500	13891
Jintai District	2020	Baoji City	3625500	.	.	3625500	14733
Jintai District	2021	Baoji City	.	.	.	3601500	15575
Chencang District	2012	Baoji City	1515400	8678	215351	1515400	8678	215351
Chencang District	2013	Baoji City	1629100	9850	231175	1629100	9850	231175
Chencang District	2014	Baoji City	1736400	11081	239216	1736400	11081	239216
Chencang District	2015	Baoji City	1477200	9823	246346	1477200	9823	246346
Chencang District	2016	Baoji City	1647800	10638	257312	1647800	10638	257312
Chencang District	2017	Baoji City	1913800	.	260421	1913800	11453	260421
Chencang District	2018	Baoji City	2128441	.	224288	2128441	12268	224288
Chencang District	2019	Baoji City	2144061	.	252164	2144061	13083	252164
Chencang District	2020	Baoji City	2205587	.	286668	2205587	13898	286668
Chencang District	2021	Baoji City	2413681	.	295459	2413681	14713	295459
Fengxiang County	2012	Baoji City	1430100	9159	209002	1430100	9159	209002
Fengxiang County	2013	Baoji City	1619600	10423	221346	1619600	10423	221346
Fengxiang County	2014	Baoji City	1818100	11716	241720	1818100	11716	241720
Fengxiang County	2015	Baoji City	1877600	10375	242161	1877600	10375	242161
Fengxiang County	2016	Baoji City	2020400	11225	250497	2020400	11225	250497
Fengxiang County	2017	Baoji City	2088500	.	253099	2088500	12075	253099
Fengxiang County	2018	Baoji City	2167995	.	230519	2167995	12925	230519
Fengxiang County	2019	Baoji City	2236551	.	250196	2236551	13775	250196
Fengxiang County	2020	Baoji City	2397666	.	287006	2397666	14625	287006
Fengxiang County	2021	Baoji City	2642959	.	296176	2642959	15475	296176
Qishan County	2012	Baoji City	1340100	9153	205104	1340100	9153	205104
Qishan County	2013	Baoji City	1440900	10435	224097	1440900	10435	224097
Qishan County	2014	Baoji City	1491000	11791	225449	1491000	11791	225449
Qishan County	2015	Baoji City	1438500	10483	229643	1438500	10483	229643
Qishan County	2016	Baoji City	1561100	11343	237439	1561100	11343	237439
Qishan County	2017	Baoji City	1886300	.	243056	1886300	12203	243056
Qishan County	2018	Baoji City	1930974	.	220423	1930974	13063	220423
Qishan County	2019	Baoji City	1793382	.	239779	1793382	13923	239779
Qishan County	2020	Baoji City	1690945	.	271348	1690945	14783	271348
Qishan County	2021	Baoji City	1747059	.	288859	1747059	15643	288859
Fufeng County	2012	Baoji City	818500	7565	176378	818500	7565	176378
Fufeng County	2013	Baoji City	951300	8647	185938	951300	8647	185938
Fufeng County	2014	Baoji City	1005700	9736	197171	1005700	9736	197171
Fufeng County	2015	Baoji City	978700	8646	203762	978700	8646	203762
Fufeng County	2016	Baoji City	1081600	9363	210596	1081600	9363	210596
Fufeng County	2017	Baoji City	1246500	.	212756	1246500	10080	212756
Fufeng County	2018	Baoji City	1398717	.	208194	1398717	10797	208194
Fufeng County	2019	Baoji City	1471413	.	216737	1471413	11514	216737
Fufeng County	2020	Baoji City	1545066	.	245087	1545066	12231	245087
Fufeng County	2021	Baoji City	1735681	.	264849	1735681	12948	264849
Mei County	2012	Baoji City	771900	8313	151823	771900	8313	151823
Mei County	2013	Baoji City	905700	9527	180610	905700	9527	180610
Mei County	2014	Baoji City	1046300	10755	203700	1046300	10755	203700
Mei County	2015	Baoji City	1069100	9590	204416	1069100	9590	204416
Mei County	2016	Baoji City	1155100	10386	209760	1155100	10386	209760
Mei County	2017	Baoji City	1289200	.	211393	1289200	11182	211393
Mei County	2018	Baoji City	1369809	.	223515	1369809	11978	223515
Mei County	2019	Baoji City	1612147	.	239216	1612147	12774	239216
Mei County	2020	Baoji City	1770147	.	281418	1770147	13570	281418
Mei County	2021	Baoji City	1997975	.	316335	1997975	14366	316335
Long County	2012	Baoji City	433000	6740	162519	433000	6740	162519
Long County	2013	Baoji City	498800	7644	158051	498800	7644	158051
Long County	2014	Baoji City	571600	8568	166059	571600	8568	166059
Long County	2015	Baoji City	597800	7581	171335	597800	7581	171335
Long County	2016	Baoji City	675500	8226	178828	675500	8226	178828
Long County	2017	Baoji City	848200	.	186579	848200	8871	186579
Long County	2018	Baoji City	974213	.	171201	974213	9516	171201
Long County	2019	Baoji City	915529	.	186364	915529	10161	186364
Long County	2020	Baoji City	986618	.	216450	986618	10806	216450
Long County	2021	Baoji City	1088482	.	234176	1088482	11451	234176
Qianyang County	2012	Baoji City	259400	7007	88356	259400	7007	88356
Qianyang County	2013	Baoji City	310100	7938	95202	310100	7938	95202
Qianyang County	2014	Baoji City	350600	8955	91816	350600	8955	91816
Qianyang County	2015	Baoji City	411100	7915	95697	411100	7915	95697
Qianyang County	2016	Baoji City	486600	8572	103354	486600	8572	103354
Qianyang County	2017	Baoji City	543400	.	104669	543400	9229	104669
Qianyang County	2018	Baoji City	597588	.	91812	597588	9886	91812
Qianyang County	2019	Baoji City	676914	.	103453	676914	10543	103453
Qianyang County	2020	Baoji City	738229	.	119976	738229	11200	119976
Qianyang County	2021	Baoji City	820052	.	121233	820052	11857	121233
Linyou County	2012	Baoji City	411500	6696	62375	411500	6696	62375
Linyou County	2013	Baoji City	505900	7580	63069	505900	7580	63069
Linyou County	2014	Baoji City	557500	8512	65891	557500	8512	65891
Linyou County	2015	Baoji City	644800	7518	67079	644800	7518	67079
Linyou County	2016	Baoji City	711100	8157	71254	711100	8157	71254
Linyou County	2017	Baoji City	1065400	.	72960	1065400	8796	72960
Linyou County	2018	Baoji City	1097200	.	59800	1097200	9435	59800
Linyou County	2019	Baoji City	1406100	.	67800	1406100	10074	67800
Linyou County	2020	Baoji City	1282600	.	77400	1282600	10713	77400
Linyou County	2021	Baoji City	1790000	.	85300	1790000	11352	85300
Feng County	2012	Baoji City	1108000	9061	56348	1108000	9061	56348
Feng County	2013	Baoji City	1302100	10402	60073	1302100	10402	60073
Feng County	2014	Baoji City	1456100	11765	63719	1456100	11765	63719
Feng County	2015	Baoji City	1484500	10236	66515	1484500	10236	66515
Feng County	2016	Baoji City	1707400	11055	68760	1707400	11055	68760
Feng County	2017	Baoji City	1801000	.	73993	1801000	11874	73993
Feng County	2018	Baoji City	1337800	.	70900	1337800	12693	70900
Feng County	2019	Baoji City	776599	.	84346	776599	13512	84346
Feng County	2020	Baoji City	798475	.	95042	798475	14331	95042
Feng County	2021	Baoji City	914957	.	98283	914957	15150	98283
Taibai County	2012	Baoji City	137900	6610	46102	137900	6610	46102
Taibai County	2013	Baoji City	158300	7476	51661	158300	7476	51661
Taibai County	2014	Baoji City	171100	8463	52932	171100	8463	52932
Taibai County	2015	Baoji City	196000	7540	57560	196000	7540	57560
Taibai County	2016	Baoji City	209100	8181	58526	209100	8181	58526
Taibai County	2017	Baoji City	224500	.	64065	224500	8822	64065
Taibai County	2018	Baoji City	276957	.	66393	276957	9463	66393
Taibai County	2019	Baoji City	302589	.	69074	302589	10104	69074
Taibai County	2020	Baoji City	374673	.	87834	374673	10745	87834
Taibai County	2021	Baoji City	455471	.	87140	455471	11386	87140
Qindu District	2012	Xianyang City	3300400	9355	.	3300400	9355
Qindu District	2013	Xianyang City	3752900	10787	.	3752900	10787
Qindu District	2014	Xianyang City	4250100	12211	.	4250100	12211
Qindu District	2015	Xianyang City	4665400	11398	.	4665400	11398
Qindu District	2016	Xianyang City	5196000	12321	.	5196000	12321
Qindu District	2017	Xianyang City	4010000	.	.	4010000	13244
Qindu District	2018	Xianyang City	3828200	.	.	3828200	14167
Qindu District	2019	Xianyang City	3438500	.	.	3438500	15090
Qindu District	2020	Xianyang City	3619400	.	.	3619400	16013
Qindu District	2021	Xianyang City	.	.	.	3800300	16936
Weicheng District	2012	Xianyang City	2664400	9218	.	2664400	9218
Weicheng District	2013	Xianyang City	3052200	10582	.	3052200	10582
Weicheng District	2014	Xianyang City	3164300	11979	.	3164300	11979
Weicheng District	2015	Xianyang City	3130900	11183	.	3130900	11183
Weicheng District	2016	Xianyang City	3449000	12053	.	3449000	12053
Weicheng District	2017	Xianyang City	3039200	.	.	3039200	12923
Weicheng District	2018	Xianyang City	3787200	.	.	3787200	13793
Weicheng District	2019	Xianyang City	2565900	.	.	2565900	14663
Weicheng District	2020	Xianyang City	2745700	.	.	2745700	15533
Weicheng District	2021	Xianyang City	.	.	.	2925500	16403
Sanyuan County	2012	Xianyang City	1204800	8383	261160	1204800	8383	261160
Sanyuan County	2013	Xianyang City	1408100	9607	274062	1408100	9607	274062
Sanyuan County	2014	Xianyang City	1601300	10846	291714	1601300	10846	291714
Sanyuan County	2015	Xianyang City	1776300	10135	298715	1776300	10135	298715
Sanyuan County	2016	Xianyang City	1935100	10961	306444	1935100	10961	306444
Sanyuan County	2017	Xianyang City	2360900	.	309069	2360900	11787	309069
Sanyuan County	2018	Xianyang City	2397556	.	265263	2397556	12613	265263
Sanyuan County	2019	Xianyang City	2153480	.	281000	2153480	13439	281000
Sanyuan County	2020	Xianyang City	2077589	.	330562	2077589	14265	330562
Sanyuan County	2021	Xianyang City	2360850	.	356900	2360850	15091	356900
Jingyang County	2012	Xianyang City	1180200	8379	386382	1180200	8379	386382
Jingyang County	2013	Xianyang City	1350100	9561	408695	1350100	9561	408695
Jingyang County	2014	Xianyang City	1520300	10794	438354	1520300	10794	438354
Jingyang County	2015	Xianyang City	1602300	10106	449989	1602300	10106	449989
Jingyang County	2016	Xianyang City	1790400	10940	464240	1790400	10940	464240
Jingyang County	2017	Xianyang City	759600	.	312242	759600	11774	312242
Jingyang County	2018	Xianyang City	754310	.	280000	754310	12608	280000
Jingyang County	2019	Xianyang City	757300	.	292650	757300	13442	292650
Jingyang County	2020	Xianyang City	808970	.	331740	808970	14276	331740
Jingyang County	2021	Xianyang City	1167780	.	405060	1167780	15110	405060
Qian County	2012	Xianyang City	1080900	8314	254753	1080900	8314	254753
Qian County	2013	Xianyang City	1272100	9495	278552	1272100	9495	278552
Qian County	2014	Xianyang City	1450400	10700	296239	1450400	10700	296239
Qian County	2015	Xianyang City	1507400	10007	304620	1507400	10007	304620
Qian County	2016	Xianyang City	1623800	10773	316721	1623800	10773	316721
Qian County	2017	Xianyang City	1789400	.	321138	1789400	11539	321138
Qian County	2018	Xianyang City	1736460	.	287060	1736460	12305	287060
Qian County	2019	Xianyang City	1716220	.	302180	1716220	13071	302180
Qian County	2020	Xianyang City	1556210	.	352730	1556210	13837	352730
Qian County	2021	Xianyang City	1758100	.	389300	1758100	14603	389300
Liquan County	2012	Xianyang City	1086200	8381	426842	1086200	8381	426842
Liquan County	2013	Xianyang City	1278600	9571	464901	1278600	9571	464901
Liquan County	2014	Xianyang City	1450200	10796	501987	1450200	10796	501987
Liquan County	2015	Xianyang City	1518300	10089	507949	1518300	10089	507949
Liquan County	2016	Xianyang City	1641500	10922	540365	1641500	10922	540365
Liquan County	2017	Xianyang City	1741700	.	546388	1741700	11755	546388
Liquan County	2018	Xianyang City	1605154	.	473923	1605154	12588	473923
Liquan County	2019	Xianyang City	1535000	.	499000	1535000	13421	499000
Liquan County	2020	Xianyang City	1561800	.	528900	1561800	14254	528900
Liquan County	2021	Xianyang City	1721301	.	561663	1721301	15087	561663
Yongshou County	2012	Xianyang City	348700	6391	123842	348700	6391	123842
Yongshou County	2013	Xianyang City	413300	7317	133062	413300	7317	133062
Yongshou County	2014	Xianyang City	448300	8232	143000	448300	8232	143000
Yongshou County	2015	Xianyang City	500000	7720	150110	500000	7720	150110
Yongshou County	2016	Xianyang City	586100	8419	159780	586100	8419	159780
Yongshou County	2017	Xianyang City	731100	.	169458	731100	9118	169458
Yongshou County	2018	Xianyang City	854257	.	184045	854257	9817	184045
Yongshou County	2019	Xianyang City	843570	.	200150	843570	10516	200150
Yongshou County	2020	Xianyang City	846230	.	225700	846230	11215	225700
Yongshou County	2021	Xianyang City	945940	.	252040	945940	11914	252040
Changwu County	2012	Xianyang City	446200	6622	126011	446200	6622	126011
Changwu County	2013	Xianyang City	525800	7556	136649	525800	7556	136649
Changwu County	2014	Xianyang City	606100	8508	147306	606100	8508	147306
Changwu County	2015	Xianyang City	688300	7987	152760	688300	7987	152760
Changwu County	2016	Xianyang City	730000	8702	158683	730000	8702	158683
Changwu County	2017	Xianyang City	959200	.	166383	959200	9417	166383
Changwu County	2018	Xianyang City	1004600	.	162800	1004600	10132	162800
Changwu County	2019	Xianyang City	1022450	.	176090	1022450	10847	176090
Changwu County	2020	Xianyang City	991500	.	186800	991500	11562	186800
Changwu County	2021	Xianyang City	1183200	.	201700	1183200	12277	201700
Xunyi County	2012	Xianyang City	868400	6662	232570	868400	6662	232570
Xunyi County	2013	Xianyang City	1022800	7701	244209	1022800	7701	244209
Xunyi County	2014	Xianyang City	1160200	8741	268200	1160200	8741	268200
Xunyi County	2015	Xianyang City	1049230	8208	270580	1049230	8208	270580
Xunyi County	2016	Xianyang City	1066300	8951	292882	1066300	8951	292882
Xunyi County	2017	Xianyang City	1220200	.	293471	1220200	9694	293471
Xunyi County	2018	Xianyang City	965846	.	264731	965846	10437	264731
Xunyi County	2019	Xianyang City	883870	.	285120	883870	11180	285120
Xunyi County	2020	Xianyang City	892100	.	311580	892100	11923	311580
Xunyi County	2021	Xianyang City	1059300	.	343890	1059300	12666	343890
Chunhua County	2012	Xianyang City	426700	6572	217400	426700	6572	217400
Chunhua County	2013	Xianyang City	502500	7518	213877	502500	7518	213877
Chunhua County	2014	Xianyang City	535400	8451	229224	535400	8451	229224
Chunhua County	2015	Xianyang City	573800	7929	231687	573800	7929	231687
Chunhua County	2016	Xianyang City	649100	8639	250230	649100	8639	250230
Chunhua County	2017	Xianyang City	747800	.	261616	747800	9349	261616
Chunhua County	2018	Xianyang City	760800	.	250100	760800	10059	250100
Chunhua County	2019	Xianyang City	775200	.	265400	775200	10769	265400
Chunhua County	2020	Xianyang City	820170	.	314810	820170	11479	314810
Chunhua County	2021	Xianyang City	907400	.	342300	907400	12189	342300
Wugong County	2012	Xianyang City	741400	8167	185150	741400	8167	185150
Wugong County	2013	Xianyang City	959400	9335	187882	959400	9335	187882
Wugong County	2014	Xianyang City	1100400	10521	202671	1100400	10521	202671
Wugong County	2015	Xianyang City	1124500	9857	209891	1124500	9857	209891
Wugong County	2016	Xianyang City	1232500	10660	223719	1232500	10660	223719
Wugong County	2017	Xianyang City	1409000	.	235259	1409000	11463	235259
Wugong County	2018	Xianyang City	1412380	.	214100	1412380	12266	214100
Wugong County	2019	Xianyang City	1531550	.	232470	1531550	13069	232470
Wugong County	2020	Xianyang City	1545850	.	256230	1545850	13872	256230
Wugong County	2021	Xianyang City	1713500	.	275470	1713500	14675	275470
Xingping City	2012	Xianyang City	1452000	8437	209999	1452000	8437	209999
Xingping City	2013	Xianyang City	1752200	9677	227404	1752200	9677	227404
Xingping City	2014	Xianyang City	1827700	10936	243411	1827700	10936	243411
Xingping City	2015	Xianyang City	1916993	10232	249283	1916993	10232	249283
Xingping City	2016	Xianyang City	2176700	11067	260376	2176700	11067	260376
Xingping City	2017	Xianyang City	2411100	.	249261	2411100	11902	249261
Xingping City	2018	Xianyang City	2483302	.	216675	2483302	12737	216675
Xingping City	2019	Xianyang City	2416440	.	235461	2416440	13572	235461
Xingping City	2020	Xianyang City	2421100	.	263010	2421100	14407	263010
Xingping City	2021	Xianyang City	2809539	.	342639	2809539	15242	342639
Binzhou City	2012	Xianyang City	1361800	7835	144544	1361800	7835	144544
Binzhou City	2013	Xianyang City	1654300	9058	156689	1654300	9058	156689
Binzhou City	2014	Xianyang City	1860900	10271	168073	1860900	10271	168073
Binzhou City	2015	Xianyang City	1700100	9640	172374	1700100	9640	172374
Binzhou City	2016	Xianyang City	1888200	10453	178821	1888200	10453	178821
Binzhou City	2017	Xianyang City	2136200	.	190428	2136200	11266	190428
Binzhou City	2018	Xianyang City	2171140	.	185600	2171140	12079	185600
Binzhou City	2019	Xianyang City	2311030	.	200990	2311030	12892	200990
Binzhou City	2020	Xianyang City	2161430	.	217780	2161430	13705	217780
Binzhou City	2021	Xianyang City	2701583	.	232324	2701583	14518	232324
Linwei District	2012	Weinan City	2625200	6887	.	2625200	6887
Linwei District	2013	Weinan City	2737400	7870	.	2737400	7870
Linwei District	2014	Weinan City	3037900	8940	.	3037900	8940
Linwei District	2015	Weinan City	3068100	9045	.	3068100	9045
Linwei District	2016	Weinan City	3326700	9805	.	3326700	9805
Linwei District	2017	Weinan City	3705200	.	.	3705200	10565
Linwei District	2018	Weinan City	4196400	.	.	4196400	11325
Linwei District	2019	Weinan City	4276100	.	.	4276100	12085
Linwei District	2020	Weinan City	4418900	.	.	4418900	12845
Linwei District	2021	Weinan City	.	.	.	4561700	13605
Huazhou District	2012	Weinan City	1106900	6505	79438	1106900	6505	79438
Huazhou District	2013	Weinan City	1144300	7487	87358	1144300	7487	87358
Huazhou District	2014	Weinan City	1157500	8438	93970	1157500	8438	93970
Huazhou District	2015	Weinan City	1080300	8430	96415	1080300	8430	96415
Huazhou District	2016	Weinan City	882200	9088	100535	882200	9088	100535
Huazhou District	2017	Weinan City	949800	.	103510	949800	9746	103510
Huazhou District	2018	Weinan City	756097	.	134720	756097	10404	134720
Huazhou District	2019	Weinan City	993373	.	148893	993373	11062	148893
Huazhou District	2020	Weinan City	965843	.	171130	965843	11720	171130
Huazhou District	2021	Weinan City	1119800	.	181100	1119800	12378	181100
Tongguan County	2012	Weinan City	328000	6388	29940	328000	6388	29940
Tongguan County	2013	Weinan City	387500	7391	34270	387500	7391	34270
Tongguan County	2014	Weinan City	411000	8381	34240	411000	8381	34240
Tongguan County	2015	Weinan City	365500	8368	35190	365500	8368	35190
Tongguan County	2016	Weinan City	369000	9063	36572	369000	9063	36572
Tongguan County	2017	Weinan City	457700	.	37916	457700	9758	37916
Tongguan County	2018	Weinan City	403487	.	48440	403487	10453	48440
Tongguan County	2019	Weinan City	441972	.	53986	441972	11148	53986
Tongguan County	2020	Weinan City	440851	.	63172	440851	11843	63172
Tongguan County	2021	Weinan City	473732	.	68392	473732	12538	68392
Dali County	2012	Weinan City	1005800	7051	266338	1005800	7051	266338
Dali County	2013	Weinan City	1098400	8070	287831	1098400	8070	287831
Dali County	2014	Weinan City	1123700	9184	311324	1123700	9184	311324
Dali County	2015	Weinan City	1047300	9306	319635	1047300	9306	319635
Dali County	2016	Weinan City	1159500	10106	337452	1159500	10106	337452
Dali County	2017	Weinan City	1620400	.	623800	1620400	10906	623800
Dali County	2018	Weinan City	1505775	.	428663	1505775	11706	428663
Dali County	2019	Weinan City	1685611	.	476872	1685611	12506	476872
Dali County	2020	Weinan City	1755100	.	557100	1755100	13306	557100
Dali County	2021	Weinan City	1924624	.	596518	1924624	14106	596518
Heyang County	2012	Weinan City	601000	5912	151269	601000	5912	151269
Heyang County	2013	Weinan City	678500	6785	160687	678500	6785	160687
Heyang County	2014	Weinan City	713900	7620	174894	713900	7620	174894
Heyang County	2015	Weinan City	753100	7646	181981	753100	7646	181981
Heyang County	2016	Weinan City	784700	8311	191796	784700	8311	191796
Heyang County	2017	Weinan City	924500	.	197510	924500	8976	197510
Heyang County	2018	Weinan City	971800	.	255200	971800	9641	255200
Heyang County	2019	Weinan City	1049762	.	285133	1049762	10306	285133
Heyang County	2020	Weinan City	1129682	.	337663	1129682	10971	337663
Heyang County	2021	Weinan City	1239066	.	354921	1239066	11636	354921
Chengcheng County	2012	Weinan City	770700	5938	175310	770700	5938	175310
Chengcheng County	2013	Weinan City	830100	6800	188677	830100	6800	188677
Chengcheng County	2014	Weinan City	852900	7691	196430	852900	7691	196430
Chengcheng County	2015	Weinan City	822600	7687	202072	822600	7687	202072
Chengcheng County	2016	Weinan City	790400	8302	212954	790400	8302	212954
Chengcheng County	2017	Weinan City	856900	.	217238	856900	8917	217238
Chengcheng County	2018	Weinan City	878458	.	272915	878458	9532	272915
Chengcheng County	2019	Weinan City	984934	.	304252	984934	10147	304252
Chengcheng County	2020	Weinan City	1035419	.	360636	1035419	10762	360636
Chengcheng County	2021	Weinan City	1137248	.	386808	1137248	11377	386808
Pucheng County	2012	Weinan City	1300100	6603	213420	1300100	6603	213420
Pucheng County	2013	Weinan City	1418700	7615	222161	1418700	7615	222161
Pucheng County	2014	Weinan City	1516200	8590	236160	1516200	8590	236160
Pucheng County	2015	Weinan City	1551600	8557	243668	1551600	8557	243668
Pucheng County	2016	Weinan City	1631300	9250	254570	1631300	9250	254570
Pucheng County	2017	Weinan City	1815300	.	266933	1815300	9943	266933
Pucheng County	2018	Weinan City	1906335	.	333298	1906335	10636	333298
Pucheng County	2019	Weinan City	1941567	.	360473	1941567	11329	360473
Pucheng County	2020	Weinan City	2035357	.	418196	2035357	12022	418196
Pucheng County	2021	Weinan City	2259974	.	462261	2259974	12715	462261
Baishui County	2012	Weinan City	555000	6242	181008	555000	6242	181008
Baishui County	2013	Weinan City	612100	7215	202692	612100	7215	202692
Baishui County	2014	Weinan City	663000	8218	227910	663000	8218	227910
Baishui County	2015	Weinan City	615400	8314	237235	615400	8314	237235
Baishui County	2016	Weinan City	629700	9046	249748	629700	9046	249748
Baishui County	2017	Weinan City	722300	.	256897	722300	9778	256897
Baishui County	2018	Weinan City	774973	.	325466	774973	10510	325466
Baishui County	2019	Weinan City	845257	.	346957	845257	11242	346957
Baishui County	2020	Weinan City	841442	.	385987	841442	11974	385987
Baishui County	2021	Weinan City	936832	.	417145	936832	12706	417145
Fuping County	2012	Weinan City	1001000	6551	230181	1001000	6551	230181
Fuping County	2013	Weinan City	1201200	7514	246525	1201200	7514	246525
Fuping County	2014	Weinan City	1355100	8476	263250	1355100	8476	263250
Fuping County	2015	Weinan City	1303500	8515	271000	1303500	8515	271000
Fuping County	2016	Weinan City	1373000	9171	284427	1373000	9171	284427
Fuping County	2017	Weinan City	1444800	.	290307	1444800	9827	290307
Fuping County	2018	Weinan City	1659967	.	382145	1659967	10483	382145
Fuping County	2019	Weinan City	1839644	.	422153	1839644	11139	422153
Fuping County	2020	Weinan City	1930770	.	480318	1930770	11795	480318
Fuping County	2021	Weinan City	2146643	.	511654	2146643	12451	511654
Hancheng City	2012	Weinan City	2332200	8852	129383	2332200	8852	129383
Hancheng City	2013	Weinan City	2820600	10179	132352	2820600	10179	132352
Hancheng City	2014	Weinan City	3030100	11400	138177	3030100	11400	138177
Hancheng City	2015	Weinan City	3112900	11429	143256	3112900	11429	143256
Hancheng City	2016	Weinan City	3203800	12400	151869	3203800	12400	151869
Hancheng City	2017	Weinan City	3490000	.	156245	3490000	13371	156245
Hancheng City	2018	Weinan City	3689941	.	224921	3689941	14342	224921
Hancheng City	2019	Weinan City	3518557	.	245308	3518557	15313	245308
Hancheng City	2020	Weinan City	3384402	.	270664	3384402	16284	270664
Hancheng City	2021	Weinan City	3745198	.	274143	3745198	17255	274143
Huayin City	2012	Weinan City	676300	6402	50360	676300	6402	50360
Huayin City	2013	Weinan City	740600	7325	52542	740600	7325	52542
Huayin City	2014	Weinan City	783500	8241	56300	783500	8241	56300
Huayin City	2015	Weinan City	804200	8236	56300	804200	8236	56300
Huayin City	2016	Weinan City	700200	8862	60484	700200	8862	60484
Huayin City	2017	Weinan City	849600	.	62375	849600	9488	62375
Huayin City	2018	Weinan City	911614	.	85258	911614	10114	85258
Huayin City	2019	Weinan City	707898	.	92518	707898	10740	92518
Huayin City	2020	Weinan City	724847	.	104781	724847	11366	104781
Huayin City	2021	Weinan City	776000	.	114600	776000	11992	114600
Baota District	2012	Yan’an City	2033100	7483	.	2033100	7483
Baota District	2013	Yan’an City	2165700	8493	.	2165700	8493
Baota District	2014	Yan’an City	2433900	9529	.	2433900	9529
Baota District	2015	Yan’an City	2694000	9090	.	2694000	9090
Baota District	2016	Yan’an City	2551300	9835	.	2551300	9835
Baota District	2017	Yan’an City	2912300	.	.	2912300	10580
Baota District	2018	Yan’an City	3289500	.	.	3289500	11325
Baota District	2019	Yan’an City	3639100	.	.	3639100	12070
Baota District	2020	Yan’an City	3685400	.	.	3685400	12815
Baota District	2021	Yan’an City	.	.	.	3731700	13560
Ansai District	2012	Yan’an City	1057500	8046	64749	1057500	8046	64749
Ansai District	2013	Yan’an City	1043200	9148	69594	1043200	9148	69594
Ansai District	2014	Yan’an City	1064400	10374	73190	1064400	10374	73190
Ansai District	2015	Yan’an City	971000	10437	73074	971000	10437	73074
Ansai District	2016	Yan’an City	766700	11271	80729	766700	11271	80729
Ansai District	2017	Yan’an City	913000	.	82624	913000	12105	82624
Ansai District	2018	Yan’an City	1072200	.	117800	1072200	12939	117800
Ansai District	2019	Yan’an City	1146310	.	124170	1146310	13773	124170
Ansai District	2020	Yan’an City	1112604	.	172952	1112604	14607	172952
Ansai District	2021	Yan’an City	1457189	.	195615	1457189	15441	195615
Yanchang County	2012	Yan’an City	340900	6282	73084	340900	6282	73084
Yanchang County	2013	Yan’an City	376700	7124	80190	376700	7124	80190
Yanchang County	2014	Yan’an City	410900	8007	86980	410900	8007	86980
Yanchang County	2015	Yan’an City	430000	8671	87863	430000	8671	87863
Yanchang County	2016	Yan’an City	378200	9286	87950	378200	9286	87950
Yanchang County	2017	Yan’an City	459900	.	89259	459900	9901	89259
Yanchang County	2018	Yan’an City	540779	.	108137	540779	10516	108137
Yanchang County	2019	Yan’an City	528700	.	109880	528700	11131	109880
Yanchang County	2020	Yan’an City	540600	.	151100	540600	11746	151100
Yanchang County	2021	Yan’an City	684939	.	172727	684939	12361	172727
Yanchuan County	2012	Yan’an City	823800	5815	47951	823800	5815	47951
Yanchuan County	2013	Yan’an City	945600	6530	53480	945600	6530	53480
Yanchuan County	2014	Yan’an City	1001700	7634	59426	1001700	7634	59426
Yanchuan County	2015	Yan’an City	704400	8354	67342	704400	8354	67342
Yanchuan County	2016	Yan’an City	681100	9063	75529	681100	9063	75529
Yanchuan County	2017	Yan’an City	806500	.	77324	806500	9772	77324
Yanchuan County	2018	Yan’an City	1143557	.	95303	1143557	10481	95303
Yanchuan County	2019	Yan’an City	994370	.	98130	994370	11190	98130
Yanchuan County	2020	Yan’an City	1017800	.	119400	1017800	11899	119400
Yanchuan County	2021	Yan’an City	1189725	.	127040	1189725	12608	127040
Zichang City	2012	Yan’an City	745600	7357	66050	745600	7357	66050
Zichang City	2013	Yan’an City	831300	8357	70372	831300	8357	70372
Zichang City	2014	Yan’an City	811200	9335	72000	811200	9335	72000
Zichang City	2015	Yan’an City	722200	9021	63529	722200	9021	63529
Zichang City	2016	Yan’an City	749700	9752	69943	749700	9752	69943
Zichang City	2017	Yan’an City	971900	.	71440	971900	10483	71440
Zichang City	2018	Yan’an City	1145757	.	71598	1145757	11214	71598
Zichang City	2019	Yan’an City	1110650	.	73000	1110650	11945	73000
Zichang City	2020	Yan’an City	1000141	.	77659	1000141	12676	77659
Zichang City	2021	Yan’an City	1356686	.	93761	1356686	13407	93761
Zhidan County	2012	Yan’an City	1759800	7872	44490	1759800	7872	44490
Zhidan County	2013	Yan’an City	1678900	8872	47141	1678900	8872	47141
Zhidan County	2014	Yan’an City	1666200	10001	50192	1666200	10001	50192
Zhidan County	2015	Yan’an City	1341400	9971	50310	1341400	9971	50310
Zhidan County	2016	Yan’an City	1075900	10688	51383	1075900	10688	51383
Zhidan County	2017	Yan’an City	1329900	.	55935	1329900	11405	55935
Zhidan County	2018	Yan’an City	1499800	.	76400	1499800	12122	76400
Zhidan County	2019	Yan’an City	1615520	.	77630	1615520	12839	77630
Zhidan County	2020	Yan’an City	1416695	.	97567	1416695	13556	97567
Zhidan County	2021	Yan’an City	1964136	.	113178	1964136	14273	113178
Wuqi County	2012	Yan’an City	2010700	8005	42944	2010700	8005	42944
Wuqi County	2013	Yan’an City	2097000	9110	46386	2097000	9110	46386
Wuqi County	2014	Yan’an City	2115100	10358	49401	2115100	10358	49401
Wuqi County	2015	Yan’an City	1404700	10302	48871	1404700	10302	48871
Wuqi County	2016	Yan’an City	1086500	11064	47118	1086500	11064	47118
Wuqi County	2017	Yan’an City	1353400	.	48823	1353400	11826	48823
Wuqi County	2018	Yan’an City	1506676	.	64060	1506676	12588	64060
Wuqi County	2019	Yan’an City	1787260	.	67960	1787260	13350	67960
Wuqi County	2020	Yan’an City	1501324	.	72957	1501324	14112	72957
Wuqi County	2021	Yan’an City	2104872	.	78392	2104872	14874	78392
Ganquan County	2012	Yan’an City	205000	7689	36319	205000	7689	36319
Ganquan County	2013	Yan’an City	213000	8642	39815	213000	8642	39815
Ganquan County	2014	Yan’an City	224400	9662	42190	224400	9662	42190
Ganquan County	2015	Yan’an City	216200	9778	42100	216200	9778	42100
Ganquan County	2016	Yan’an City	205800	10462	44158	205800	10462	44158
Ganquan County	2017	Yan’an City	234000	.	46178	234000	11146	46178
Ganquan County	2018	Yan’an City	266538	.	49559	266538	11830	49559
Ganquan County	2019	Yan’an City	290770	.	51560	290770	12514	51560
Ganquan County	2020	Yan’an City	288399	.	54659	288399	13198	54659
Ganquan County	2021	Yan’an City	330692	.	56909	330692	13882	56909
Fu County	2012	Yan’an City	301200	8084	103689	301200	8084	103689
Fu County	2013	Yan’an City	324900	9086	114209	324900	9086	114209
Fu County	2014	Yan’an City	389500	10313	124682	389500	10313	124682
Fu County	2015	Yan’an City	409500	10282	122120	409500	10282	122120
Fu County	2016	Yan’an City	447100	11134	133900	447100	11134	133900
Fu County	2017	Yan’an City	529100	.	138616	529100	11986	138616
Fu County	2018	Yan’an City	626780	.	160945	626780	12838	160945
Fu County	2019	Yan’an City	663700	.	167740	663700	13690	167740
Fu County	2020	Yan’an City	723705	.	220930	723705	14542	220930
Fu County	2021	Yan’an City	831275	.	233382	831275	15394	233382
Luochuan County	2012	Yan’an City	2130400	9278	191341	2130400	9278	191341
Luochuan County	2013	Yan’an City	2473400	10410	206706	2473400	10410	206706
Luochuan County	2014	Yan’an City	2294400	11742	220480	2294400	11742	220480
Luochuan County	2015	Yan’an City	1854800	10785	194014	1854800	10785	194014
Luochuan County	2016	Yan’an City	1517300	11713	211379	1517300	11713	211379
Luochuan County	2017	Yan’an City	1497800	.	213094	1497800	12641	213094
Luochuan County	2018	Yan’an City	2439861	.	184612	2439861	13569	184612
Luochuan County	2019	Yan’an City	2438730	.	241240	2438730	14497	241240
Luochuan County	2020	Yan’an City	2416417	.	339357	2416417	15425	339357
Luochuan County	2021	Yan’an City	2790488	.	365568	2790488	16353	365568
Yichuan County	2012	Yan’an City	185800	7565	93491	185800	7565	93491
Yichuan County	2013	Yan’an City	207800	8496	102584	207800	8496	102584
Yichuan County	2014	Yan’an City	227200	9626	110820	227200	9626	110820
Yichuan County	2015	Yan’an City	253200	9644	111651	253200	9644	111651
Yichuan County	2016	Yan’an City	279200	10376	117322	279200	10376	117322
Yichuan County	2017	Yan’an City	303200	.	117966	303200	11108	117966
Yichuan County	2018	Yan’an City	362603	.	149428	362603	11840	149428
Yichuan County	2019	Yan’an City	377830	.	152030	377830	12572	152030
Yichuan County	2020	Yan’an City	424045	.	190669	424045	13304	190669
Yichuan County	2021	Yan’an City	455735	.	203322	455735	14036	203322
Huanglong County	2012	Yan’an City	88600	6766	37205	88600	6766	37205
Huanglong County	2013	Yan’an City	101600	7585	39206	101600	7585	39206
Huanglong County	2014	Yan’an City	111100	8503	45615	111100	8503	45615
Huanglong County	2015	Yan’an City	132700	8958	48076	132700	8958	48076
Huanglong County	2016	Yan’an City	139600	9710	48816	139600	9710	48816
Huanglong County	2017	Yan’an City	154200	.	50168	154200	10462	50168
Huanglong County	2018	Yan’an City	170300	.	45712	170300	11214	45712
Huanglong County	2019	Yan’an City	186690	.	57760	186690	11966	57760
Huanglong County	2020	Yan’an City	195301	.	62877	195301	12718	62877
Huanglong County	2021	Yan’an City	225344	.	78267	225344	13470	78267
Huangling County	2012	Yan’an City	1034000	8974	62257	1034000	8974	62257
Huangling County	2013	Yan’an City	1085300	10096	68318	1085300	10096	68318
Huangling County	2014	Yan’an City	1113600	11267	79823	1113600	11267	79823
Huangling County	2015	Yan’an City	862000	10581	77034	862000	10581	77034
Huangling County	2016	Yan’an City	958400	11405	79654	958400	11405	79654
Huangling County	2017	Yan’an City	1198200	.	79954	1198200	12229	79954
Huangling County	2018	Yan’an City	1524078	.	92795	1524078	13053	92795
Huangling County	2019	Yan’an City	1859250	.	97500	1859250	13877	97500
Huangling County	2020	Yan’an City	1690104	.	134169	1690104	14701	134169
Huangling County	2021	Yan’an City	2489907	.	147694	2489907	15525	147694
Hantai District	2012	Hanzhong City	1562900	.	.	1562900	6190
Hantai District	2013	Hanzhong City	1771400	.	.	1771400	6896
Hantai District	2014	Hanzhong City	2038900	.	.	2038900	7602
Hantai District	2015	Hanzhong City	2302500	8308	.	2302500	8308
Hantai District	2016	Hanzhong City	2522700	9014	.	2522700	9014
Hantai District	2017	Hanzhong City	2874000	.	.	2874000	9720
Hantai District	2018	Hanzhong City	3225400	.	.	3225400	10426
Hantai District	2019	Hanzhong City	3760600	.	.	3760600	11132
Hantai District	2020	Hanzhong City	3758000	.	.	3758000	11838
Hantai District	2021	Hanzhong City	.	.	.	3755400	12544
Nanzheng District	2012	Hanzhong City	1149000	7228	185892	1149000	7228	185892
Nanzheng District	2013	Hanzhong City	1344600	8305	196267	1344600	8305	196267
Nanzheng District	2014	Hanzhong City	1540400	9368	212543	1540400	9368	212543
Nanzheng District	2015	Hanzhong City	1648800	8217	222999	1648800	8217	222999
Nanzheng District	2016	Hanzhong City	1740700	8910	240563	1740700	8910	240563
Nanzheng District	2017	Hanzhong City	1924300	.	244164	1924300	9603	244164
Nanzheng District	2018	Hanzhong City	2168570	.	300809	2168570	10296	300809
Nanzheng District	2019	Hanzhong City	2184111	.	333484	2184111	10989	333484
Nanzheng District	2020	Hanzhong City	2255445	.	381457	2255445	11682	381457
Nanzheng District	2021	Hanzhong City	2397475	.	401654	2397475	12375	401654
Chenggu County	2012	Hanzhong City	1203000	7309	360177	1203000	7309	360177
Chenggu County	2013	Hanzhong City	1382900	8383	386404	1382900	8383	386404
Chenggu County	2014	Hanzhong City	1688400	9473	415806	1688400	9473	415806
Chenggu County	2015	Hanzhong City	1925200	8236	427740	1925200	8236	427740
Chenggu County	2016	Hanzhong City	2172200	8953	457472	2172200	8953	457472
Chenggu County	2017	Hanzhong City	2467400	.	469339	2467400	9670	469339
Chenggu County	2018	Hanzhong City	2603995	.	432376	2603995	10387	432376
Chenggu County	2019	Hanzhong City	2324408	.	474962	2324408	11104	474962
Chenggu County	2020	Hanzhong City	2514139	.	542041	2514139	11821	542041
Chenggu County	2021	Hanzhong City	2824379	.	578098	2824379	12538	578098
Yang County	2012	Hanzhong City	737500	5755	191251	737500	5755	191251
Yang County	2013	Hanzhong City	850500	6618	209442	850500	6618	209442
Yang County	2014	Hanzhong City	944000	7419	224026	944000	7419	224026
Yang County	2015	Hanzhong City	1002600	8164	233456	1002600	8164	233456
Yang County	2016	Hanzhong City	1065300	8882	250503	1065300	8882	250503
Yang County	2017	Hanzhong City	1209000	.	255666	1209000	9600	255666
Yang County	2018	Hanzhong City	1400625	.	291812	1400625	10318	291812
Yang County	2019	Hanzhong City	1631580	.	321447	1631580	11036	321447
Yang County	2020	Hanzhong City	1723561	.	368811	1723561	11754	368811
Yang County	2021	Hanzhong City	1929023	.	380826	1929023	12472	380826
Xixiang County	2012	Hanzhong City	549600	5788	152579	549600	5788	152579
Xixiang County	2013	Hanzhong City	652000	6662	163687	652000	6662	163687
Xixiang County	2014	Hanzhong City	753800	7541	174215	753800	7541	174215
Xixiang County	2015	Hanzhong City	812000	8180	184719	812000	8180	184719
Xixiang County	2016	Hanzhong City	906900	8875	199633	906900	8875	199633
Xixiang County	2017	Hanzhong City	1017300	.	203102	1017300	9570	203102
Xixiang County	2018	Hanzhong City	1108536	.	210869	1108536	10265	210869
Xixiang County	2019	Hanzhong City	1167013	.	236645	1167013	10960	236645
Xixiang County	2020	Hanzhong City	1221203	.	272621	1221203	11655	272621
Xixiang County	2021	Hanzhong City	1339840	.	280730	1339840	12350	280730
Mian County	2012	Hanzhong City	965900	6642	169529	965900	6642	169529
Mian County	2013	Hanzhong City	1054400	7612	182167	1054400	7612	182167
Mian County	2014	Hanzhong City	1114100	8556	195601	1114100	8556	195601
Mian County	2015	Hanzhong City	1057500	8189	204975	1057500	8189	204975
Mian County	2016	Hanzhong City	1011600	8910	221389	1011600	8910	221389
Mian County	2017	Hanzhong City	1292700	.	224060	1292700	9631	224060
Mian County	2018	Hanzhong City	1473784	.	210299	1473784	10352	210299
Mian County	2019	Hanzhong City	1470256	.	233970	1470256	11073	233970
Mian County	2020	Hanzhong City	1609297	.	270599	1609297	11794	270599
Mian County	2021	Hanzhong City	1787398	.	282492	1787398	12515	282492
Ningqiang County	2012	Hanzhong City	485000	5754	152006	485000	5754	152006
Ningqiang County	2013	Hanzhong City	558500	6548	164239	558500	6548	164239
Ningqiang County	2014	Hanzhong City	619300	7373	174047	619300	7373	174047
Ningqiang County	2015	Hanzhong City	641200	8068	181927	641200	8068	181927
Ningqiang County	2016	Hanzhong City	715400	8746	194908	715400	8746	194908
Ningqiang County	2017	Hanzhong City	833000	.	198362	833000	9424	198362
Ningqiang County	2018	Hanzhong City	890472	.	161181	890472	10102	161181
Ningqiang County	2019	Hanzhong City	1000117	.	178968	1000117	10780	178968
Ningqiang County	2020	Hanzhong City	1066383	.	206262	1066383	11458	206262
Ningqiang County	2021	Hanzhong City	1249922	.	215192	1249922	12136	215192
Lueyang County	2012	Hanzhong City	602300	5654	74647	602300	5654	74647
Lueyang County	2013	Hanzhong City	658700	6468	80621	658700	6468	80621
Lueyang County	2014	Hanzhong City	631900	7276	86095	631900	7276	86095
Lueyang County	2015	Hanzhong City	504600	8043	89369	504600	8043	89369
Lueyang County	2016	Hanzhong City	559400	8714	95494	559400	8714	95494
Lueyang County	2017	Hanzhong City	675400	.	97777	675400	9385	97777
Lueyang County	2018	Hanzhong City	723484	.	84478	723484	10056	84478
Lueyang County	2019	Hanzhong City	711655	.	94358	711655	10727	94358
Lueyang County	2020	Hanzhong City	638300	.	108500	638300	11398	108500
Lueyang County	2021	Hanzhong City	697000	.	111900	697000	12069	111900
Zhenba County	2012	Hanzhong City	405000	5470	129472	405000	5470	129472
Zhenba County	2013	Hanzhong City	481400	6232	141844	481400	6232	141844
Zhenba County	2014	Hanzhong City	564200	7042	151722	564200	7042	151722
Zhenba County	2015	Hanzhong City	583000	8002	158167	583000	8002	158167
Zhenba County	2016	Hanzhong City	651700	8698	169318	651700	8698	169318
Zhenba County	2017	Hanzhong City	785100	.	173650	785100	9394	173650
Zhenba County	2018	Hanzhong City	845579	.	170605	845579	10090	170605
Zhenba County	2019	Hanzhong City	924474	.	189611	924474	10786	189611
Zhenba County	2020	Hanzhong City	829889	.	217898	829889	11482	217898
Zhenba County	2021	Hanzhong City	946855	.	223795	946855	12178	223795
Liuba County	2012	Hanzhong City	87800	5471	24832	87800	5471	24832
Liuba County	2013	Hanzhong City	100700	6231	26786	100700	6231	26786
Liuba County	2014	Hanzhong City	114200	7047	28837	114200	7047	28837
Liuba County	2015	Hanzhong City	127700	8015	29850	127700	8015	29850
Liuba County	2016	Hanzhong City	141100	8712	31736	141100	8712	31736
Liuba County	2017	Hanzhong City	156900	.	32793	156900	9409	32793
Liuba County	2018	Hanzhong City	169218	.	29612	169218	10106	29612
Liuba County	2019	Hanzhong City	186946	.	33327	186946	10803	33327
Liuba County	2020	Hanzhong City	199000	.	38600	199000	11500	38600
Liuba County	2021	Hanzhong City	220500	.	40400	220500	12197	40400
Foping County	2012	Hanzhong City	48300	5473	9868	48300	5473	9868
Foping County	2013	Hanzhong City	57900	6272	10740	57900	6272	10740
Foping County	2014	Hanzhong City	66500	7050	11775	66500	7050	11775
Foping County	2015	Hanzhong City	73200	8030	12460	73200	8030	12460
Foping County	2016	Hanzhong City	85600	8745	13220	85600	8745	13220
Foping County	2017	Hanzhong City	98000	.	13618	98000	9460	13618
Foping County	2018	Hanzhong City	109026	.	17397	109026	10175	17397
Foping County	2019	Hanzhong City	114767	.	19181	114767	10890	19181
Foping County	2020	Hanzhong City	118813	.	22099	118813	11605	22099
Foping County	2021	Hanzhong City	130502	.	23082	130502	12320	23082
Yuyang District	2012	Yulin City	4010900	10001	.	4010900	10001
Yuyang District	2013	Yulin City	4612600	11331	.	4612600	11331
Yuyang District	2014	Yulin City	5085700	12656	.	5085700	12656
Yuyang District	2015	Yulin City	5431000	11015	.	5431000	11015
Yuyang District	2016	Yulin City	5567200	11929	.	5567200	11929
Yuyang District	2017	Yulin City	6984700	.	.	6984700	12843
Yuyang District	2018	Yulin City	7772800	.	.	7772800	13757
Yuyang District	2019	Yulin City	9371400	.	.	9371400	14671
Yuyang District	2020	Yulin City	10010200	.	.	10010200	15585
Yuyang District	2021	Yulin City	.	.	.	10649000	16499
Hengshan District	2012	Yulin City	1042200	7860	121600	1042200	7860	121600
Hengshan District	2013	Yulin City	1218500	8725	133525	1218500	8725	133525
Hengshan District	2014	Yulin City	1360900	9364	141900	1360900	9364	141900
Hengshan District	2015	Yulin City	1165100	9760	142500	1165100	9760	142500
Hengshan District	2016	Yulin City	1211600	10522	152300	1211600	10522	152300
Hengshan District	2017	Yulin City	1544600	.	164042	1544600	11284	164042
Hengshan District	2018	Yulin City	1894400	.	231700	1894400	12046	231700
Hengshan District	2019	Yulin City	2014700	.	261200	2014700	12808	261200
Hengshan District	2020	Yulin City	1994305	.	267212	1994305	13570	267212
Hengshan District	2021	Yulin City	2734700	.	278800	2734700	14332	278800
Fugu County	2012	Yulin City	4505200	11783	52134	4505200	11783	52134
Fugu County	2013	Yulin City	4353800	13001	54279	4353800	13001	54279
Fugu County	2014	Yulin City	4365300	13409	59581	4365300	13409	59581
Fugu County	2015	Yulin City	3837600	10871	58379	3837600	10871	58379
Fugu County	2016	Yulin City	3925700	11610	65011	3925700	11610	65011
Fugu County	2017	Yulin City	4856300	.	89576	4856300	12349	89576
Fugu County	2018	Yulin City	5395771	.	88646	5395771	13088	88646
Fugu County	2019	Yulin City	6175064	.	95730	6175064	13827	95730
Fugu County	2020	Yulin City	5828060	.	105611	5828060	14566	105611
Fugu County	2021	Yulin City	7358846	.	109214	7358846	15305	109214
Jingbian County	2012	Yulin City	3170500	11413	166500	3170500	11413	166500
Jingbian County	2013	Yulin City	3521600	12680	176301	3521600	12680	176301
Jingbian County	2014	Yulin City	3651900	13086	196000	3651900	13086	196000
Jingbian County	2015	Yulin City	2668400	11058	197358	2668400	11058	197358
Jingbian County	2016	Yulin City	2449400	11910	221303	2449400	11910	221303
Jingbian County	2017	Yulin City	3039100	.	284792	3039100	12762	284792
Jingbian County	2018	Yulin City	2962350	.	280570	2962350	13614	280570
Jingbian County	2019	Yulin City	3898506	.	317012	3898506	14466	317012
Jingbian County	2020	Yulin City	3633295	.	344774	3633295	15318	344774
Jingbian County	2021	Yulin City	4500225	.	364591	4500225	8240	364591
Dingbian County	2012	Yulin City	2910100	9492	143396	2910100	9492	143396
Dingbian County	2013	Yulin City	3100800	10744	163825	3100800	10744	163825
Dingbian County	2014	Yulin City	3383900	11829	181400	3383900	11829	181400
Dingbian County	2015	Yulin City	2576300	10926	178982	2576300	10926	178982
Dingbian County	2016	Yulin City	2300300	11789	196400	2300300	11789	196400
Dingbian County	2017	Yulin City	2553200	.	200321	2553200	12652	200321
Dingbian County	2018	Yulin City	3172840	.	267420	3172840	13515	267420
Dingbian County	2019	Yulin City	3176191	.	278693	3176191	14378	278693
Dingbian County	2020	Yulin City	2631600	.	302900	2631600	15241	302900
Dingbian County	2021	Yulin City	3417158	.	336793	3417158	5934	336793
Suide County	2012	Yulin City	476200	6630	90860	476200	6630	90860
Suide County	2013	Yulin City	539500	7326	96035	539500	7326	96035
Suide County	2014	Yulin City	540900	8227	104284	540900	8227	104284
Suide County	2015	Yulin City	588700	8240	100400	588700	8240	100400
Suide County	2016	Yulin City	671500	8949	109830	671500	8949	109830
Suide County	2017	Yulin City	758700	.	115768	758700	9658	115768
Suide County	2018	Yulin City	939738	.	197270	939738	10367	197270
Suide County	2019	Yulin City	905484	.	209808	905484	11076	209808
Suide County	2020	Yulin City	1001520	.	217430	1001520	11785	217430
Suide County	2021	Yulin City	1111707	.	224362	1111707	6728	224362
Mizhi County	2012	Yulin City	401200	7509	52844	401200	7509	52844
Mizhi County	2013	Yulin City	466400	8290	55114	466400	8290	55114
Mizhi County	2014	Yulin City	486600	8903	59630	486600	8903	59630
Mizhi County	2015	Yulin City	415300	8894	56687	415300	8894	56687
Mizhi County	2016	Yulin City	448400	9658	69971	448400	9658	69971
Mizhi County	2017	Yulin City	480000	.	72778	480000	10422	72778
Mizhi County	2018	Yulin City	575800	.	96000	575800	11186	96000
Mizhi County	2019	Yulin City	655712	.	110767	655712	11950	110767
Mizhi County	2020	Yulin City	628700	.	121000	628700	12714	121000
Mizhi County	2021	Yulin City	700700	.	131200	700700	5562	131200
Jia County	2012	Yulin City	318600	6408	89100	318600	6408	89100
Jia County	2013	Yulin City	365600	7254	89195	365600	7254	89195
Jia County	2014	Yulin City	414700	8162	94000	414700	8162	94000
Jia County	2015	Yulin City	344400	8174	90629	344400	8174	90629
Jia County	2016	Yulin City	398000	8893	106031	398000	8893	106031
Jia County	2017	Yulin City	505100	.	111300	505100	9612	111300
Jia County	2018	Yulin City	549186	.	167709	549186	10331	167709
Jia County	2019	Yulin City	575895	.	177571	575895	11050	177571
Jia County	2020	Yulin City	633332	.	182871	633332	11769	182871
Jia County	2021	Yulin City	717500	.	193100	717500	5764	193100
Wubu County	2012	Yulin City	137700	6558	22083	137700	6558	22083
Wubu County	2013	Yulin City	159900	7352	22792	159900	7352	22792
Wubu County	2014	Yulin City	178000	8242	25000	178000	8242	25000
Wubu County	2015	Yulin City	167600	8155	24014	167600	8155	24014
Wubu County	2016	Yulin City	179700	8881	32070	179700	8881	32070
Wubu County	2017	Yulin City	208800	.	33883	208800	9607	33883
Wubu County	2018	Yulin City	234071	.	54541	234071	10333	54541
Wubu County	2019	Yulin City	269128	.	61057	269128	11059	61057
Wubu County	2020	Yulin City	286112	.	64106	286112	11785	64106
Wubu County	2021	Yulin City	312865	.	66107	312865	5648	66107
Qingjian County	2012	Yulin City	306800	6500	114101	306800	6500	114101
Qingjian County	2013	Yulin City	354600	7352	123147	354600	7352	123147
Qingjian County	2014	Yulin City	394000	8234	119534	394000	8234	119534
Qingjian County	2015	Yulin City	410500	8234	116514	410500	8234	116514
Qingjian County	2016	Yulin City	439100	8918	126228	439100	8918	126228
Qingjian County	2017	Yulin City	510800	.	131400	510800	9602	131400
Qingjian County	2018	Yulin City	585700	.	180900	585700	10286	180900
Qingjian County	2019	Yulin City	614100	.	194600	614100	10970	194600
Qingjian County	2020	Yulin City	630830	.	212440	630830	11654	212440
Qingjian County	2021	Yulin City	696500	.	236300	696500	5770	236300
Zizhou County	2012	Yulin City	401600	6582	88166	401600	6582	88166
Zizhou County	2013	Yulin City	484000	7394	95129	484000	7394	95129
Zizhou County	2014	Yulin City	522600	8296	103415	522600	8296	103415
Zizhou County	2015	Yulin City	440300	8322	100646	440300	8322	100646
Zizhou County	2016	Yulin City	557100	9046	119300	557100	9046	119300
Zizhou County	2017	Yulin City	624600	.	128961	624600	9770	128961
Zizhou County	2018	Yulin City	636324	.	164718	636324	10494	164718
Zizhou County	2019	Yulin City	599600	.	169900	599600	11218	169900
Zizhou County	2020	Yulin City	679304	.	187304	679304	11942	187304
Zizhou County	2021	Yulin City	772800	.	196800	772800	11849	196800
Shenmu City	2012	Yulin City	10038900	12537	106316	10038900	12537	106316
Shenmu City	2013	Yulin City	9255400	13225	114564	9255400	13225	114564
Shenmu City	2014	Yulin City	9682400	13622	119740	9682400	13622	119740
Shenmu City	2015	Yulin City	8174100	12046	119900	8174100	12046	119900
Shenmu City	2016	Yulin City	9048000	12875	132385	9048000	12875	132385
Shenmu City	2017	Yulin City	11103300	.	191921	11103300	13704	191921
Shenmu City	2018	Yulin City	12980300	.	198700	12980300	14533	198700
Shenmu City	2019	Yulin City	13628777	.	226324	13628777	15362	226324
Shenmu City	2020	Yulin City	12940036	.	261161	12940036	16191	261161
Shenmu City	2021	Yulin City	18481700	.	267500	18481700	5109	267500
Hanbin District	2012	Ankang City	1630300	5920	.	1630300	5920
Hanbin District	2013	Ankang City	1874700	6731	.	1874700	6731
Hanbin District	2014	Ankang City	2103900	7572	.	2103900	7572
Hanbin District	2015	Ankang City	2337200	7849	.	2337200	7849
Hanbin District	2016	Ankang City	2521600	8506	.	2521600	8506
Hanbin District	2017	Ankang City	2909200	.	.	2909200	9163
Hanbin District	2018	Ankang City	3423600	.	.	3423600	9820
Hanbin District	2019	Ankang City	3809500	.	.	3809500	10477
Hanbin District	2020	Ankang City	3758200	.	.	3758200	11134
Hanbin District	2021	Ankang City	.	.	.	362300	5018	86017
Hanyin County	2012	Ankang City	474200	5938	98234	474200	5938	98234
Hanyin County	2013	Ankang City	586100	6858	110451	586100	6858	110451
Hanyin County	2014	Ankang City	684400	7797	116776	684400	7797	116776
Hanyin County	2015	Ankang City	775000	8063	122571	775000	8063	122571
Hanyin County	2016	Ankang City	861600	8745	127794	861600	8745	127794
Hanyin County	2017	Ankang City	951900	.	134402	951900	9427	134402
Hanyin County	2018	Ankang City	1076703	.	145358	1076703	10109	145358
Hanyin County	2019	Ankang City	1125018	.	162161	1125018	10791	162161
Hanyin County	2020	Ankang City	1001545	.	185670	1001545	11473	185670
Hanyin County	2021	Ankang City	1109114	.	191142	1109114	5110	191142
Shiquan County	2012	Ankang City	418500	5948	56071	418500	5948	56071
Shiquan County	2013	Ankang City	477900	6786	60987	477900	6786	60987
Shiquan County	2014	Ankang City	547600	7675	63252	547600	7675	63252
Shiquan County	2015	Ankang City	629800	8011	65495	629800	8011	65495
Shiquan County	2016	Ankang City	714300	8753	69592	714300	8753	69592
Shiquan County	2017	Ankang City	809600	.	72620	809600	9495	72620
Shiquan County	2018	Ankang City	961924	.	82515	961924	10237	82515
Shiquan County	2019	Ankang City	941383	.	93090	941383	10979	93090
Shiquan County	2020	Ankang City	830204	.	107053	830204	11721	107053
Shiquan County	2021	Ankang City	938900	.	110800	938900	4813	110800
Ningshan County	2012	Ankang City	189300	5629	35313	189300	5629	35313
Ningshan County	2013	Ankang City	213500	6445	38508	213500	6445	38508
Ningshan County	2014	Ankang City	222200	7315	40626	222200	7315	40626
Ningshan County	2015	Ankang City	245200	7625	42044	245200	7625	42044
Ningshan County	2016	Ankang City	266200	8270	43422	266200	8270	43422
Ningshan County	2017	Ankang City	301600	.	46024	301600	8915	46024
Ningshan County	2018	Ankang City	346916	.	49573	346916	9560	49573
Ningshan County	2019	Ankang City	317203	.	54192	317203	10205	54192
Ningshan County	2020	Ankang City	231580	.	60823	231580	10850	60823
Ningshan County	2021	Ankang City	243400	.	62700	243400	5083	62700
Ziyang County	2012	Ankang City	467000	5966	100901	467000	5966	100901
Ziyang County	2013	Ankang City	543800	6849	103781	543800	6849	103781
Ziyang County	2014	Ankang City	647900	7794	109509	647900	7794	109509
Ziyang County	2015	Ankang City	745800	8051	110143	745800	8051	110143
Ziyang County	2016	Ankang City	804800	8789	113435	804800	8789	113435
Ziyang County	2017	Ankang City	907700	.	118393	907700	9527	118393
Ziyang County	2018	Ankang City	1036503	.	140222	1036503	10265	140222
Ziyang County	2019	Ankang City	1095914	.	155465	1095914	11003	155465
Ziyang County	2020	Ankang City	1005299	.	177368	1005299	11741	177368
Ziyang County	2021	Ankang City	1078442	.	188624	1078442	4973	188624
Langao County	2012	Ankang City	255600	5755	52235	255600	5755	52235
Langao County	2013	Ankang City	309600	6537	57767	309600	6537	57767
Langao County	2014	Ankang City	351100	7348	60251	351100	7348	60251
Langao County	2015	Ankang City	401300	7707	63912	401300	7707	63912
Langao County	2016	Ankang City	455300	8374	66841	455300	8374	66841
Langao County	2017	Ankang City	525500	.	69781	525500	9041	69781
Langao County	2018	Ankang City	593565	.	81998	593565	9708	81998
Langao County	2019	Ankang City	580189	.	91471	580189	10375	91471
Langao County	2020	Ankang City	486901	.	103894	486901	11042	103894
Langao County	2021	Ankang City	550004	.	109633	550004	5329	109633
Pingli County	2012	Ankang City	402100	6247	84331	402100	6247	84331
Pingli County	2013	Ankang City	505000	7165	93205	505000	7165	93205
Pingli County	2014	Ankang City	605900	8147	97246	605900	8147	97246
Pingli County	2015	Ankang City	679300	8130	100433	679300	8130	100433
Pingli County	2016	Ankang City	772900	8859	105027	772900	8859	105027
Pingli County	2017	Ankang City	875200	.	109182	875200	9588	109182
Pingli County	2018	Ankang City	996248	.	106890	996248	10317	106890
Pingli County	2019	Ankang City	1038998	.	119373	1038998	11046	119373
Pingli County	2020	Ankang City	890956	.	137392	890956	11775	137392
Pingli County	2021	Ankang City	1040659	.	145467	1040659	4890	145467
Zhenping County	2012	Ankang City	120000	5673	25484	120000	5673	25484
Zhenping County	2013	Ankang City	129500	6456	28349	129500	6456	28349
Zhenping County	2014	Ankang City	120600	7360	29761	120600	7360	29761
Zhenping County	2015	Ankang City	135600	7728	31041	135600	7728	31041
Zhenping County	2016	Ankang City	152600	8413	32174	152600	8413	32174
Zhenping County	2017	Ankang City	191900	.	34170	191900	9098	34170
Zhenping County	2018	Ankang City	230279	.	39798	230279	9783	39798
Zhenping County	2019	Ankang City	243411	.	44320	243411	10468	44320
Zhenping County	2020	Ankang City	237697	.	50156	237697	11153	50156
Zhenping County	2021	Ankang City	261890	.	50575	261890	5065	50575
Xunyang County	2012	Ankang City	843100	5911	104974	843100	5911	104974
Xunyang County	2013	Ankang City	1000100	6757	115745	1000100	6757	115745
Xunyang County	2014	Ankang City	1123700	7655	120872	1123700	7655	120872
Xunyang County	2015	Ankang City	1240900	7900	124355	1240900	7900	124355
Xunyang County	2016	Ankang City	1378300	8608	129949	1378300	8608	129949
Xunyang County	2017	Ankang City	1598700	.	135189	1598700	9316	135189
Xunyang County	2018	Ankang City	1879857	.	175666	1879857	10024	175666
Xunyang County	2019	Ankang City	1870492	.	198324	1870492	10732	198324
Xunyang County	2020	Ankang City	1734798	.	228310	1734798	11440	228310
Xunyang County	2021	Ankang City	2007363	.	234817	2007363	5004	234817
Baihe County	2012	Ankang City	339100	5798	59980	339100	5798	59980
Baihe County	2013	Ankang City	415600	6592	66601	415600	6592	66601
Baihe County	2014	Ankang City	482700	7416	69993	482700	7416	69993
Baihe County	2015	Ankang City	524300	7768	73508	524300	7768	73508
Baihe County	2016	Ankang City	595400	8417	75946	595400	8417	75946
Baihe County	2017	Ankang City	675100	.	79097	675100	9066	79097
Baihe County	2018	Ankang City	791735	.	97167	791735	9715	97167
Baihe County	2019	Ankang City	798439	.	107582	798439	10364	107582
Baihe County	2020	Ankang City	710627	.	122457	710627	11013	122457
Baihe County	2021	Ankang City	792362	.	129071	792362	4624	129071
Shangzhou District	2012	Shangluo City	986100	5414	120164	986100	5414	120164
Shangzhou District	2013	Shangluo City	1083500	6204	128682	1083500	6204	128682
Shangzhou District	2014	Shangluo City	1176500	7066	136167	1176500	7066	136167
Shangzhou District	2015	Shangluo City	1229000	7614	132005	1229000	7614	132005
Shangzhou District	2016	Shangluo City	1360900	8230	139534	1360900	8230	139534
Shangzhou District	2017	Shangluo City	1535100	.	142484	1535100	8846	142484
Shangzhou District	2018	Shangluo City	1535104	.	142484	1535104	9462	142484
Shangzhou District	2019	Shangluo City	1567480	.	159040	1567480	10078	159040
Shangzhou District	2020	Shangluo City	1415900	.	185040	1415900	10694	185040
Shangzhou District	2021	Shangluo City	1515730	.	188430	1515730	4770	188430
Luonan County	2012	Shangluo City	706900	5592	172150	706900	5592	172150
Luonan County	2013	Shangluo City	828400	6414	186237	828400	6414	186237
Luonan County	2014	Shangluo City	920600	7301	198025	920600	7301	198025
Luonan County	2015	Shangluo City	991700	7705	206134	991700	7705	206134
Luonan County	2016	Shangluo City	1133900	8375	214168	1133900	8375	214168
Luonan County	2017	Shangluo City	1367000	.	218820	1367000	9045	218820
Luonan County	2018	Shangluo City	1406450	.	210290	1406450	9715	210290
Luonan County	2019	Shangluo City	1485570	.	227170	1485570	10385	227170
Luonan County	2020	Shangluo City	1185410	.	229300	1185410	11055	229300
Luonan County	2021	Shangluo City	1379080	.	236580	1379080	4739	236580
Danfeng County	2012	Shangluo City	528300	5536	103381	528300	5536	103381
Danfeng County	2013	Shangluo City	622300	6333	106139	622300	6333	106139
Danfeng County	2014	Shangluo City	732000	7149	110632	732000	7149	110632
Danfeng County	2015	Shangluo City	789400	7701	109179	789400	7701	109179
Danfeng County	2016	Shangluo City	866700	8340	110405	866700	8340	110405
Danfeng County	2017	Shangluo City	972300	.	112978	972300	8979	112978
Danfeng County	2018	Shangluo City	990490	.	107410	990490	9618	107410
Danfeng County	2019	Shangluo City	980180	.	113530	980180	10257	113530
Danfeng County	2020	Shangluo City	889430	.	137320	889430	10896	137320
Danfeng County	2021	Shangluo City	995130	.	151390	995130	4658	151390
Shangnan County	2012	Shangluo City	473900	5529	111230	473900	5529	111230
Shangnan County	2013	Shangluo City	539200	6400	119700	539200	6400	119700
Shangnan County	2014	Shangluo City	633900	7219	118620	633900	7219	118620
Shangnan County	2015	Shangluo City	689200	7739	117170	689200	7739	117170
Shangnan County	2016	Shangluo City	763100	8420	123150	763100	8420	123150
Shangnan County	2017	Shangluo City	875400	.	122858	875400	9101	122858
Shangnan County	2018	Shangluo City	879026	.	119166	879026	9782	119166
Shangnan County	2019	Shangluo City	914150	.	129880	914150	10463	129880
Shangnan County	2020	Shangluo City	814284	.	146990	814284	11144	146990
Shangnan County	2021	Shangluo City	940560	.	150050	940560	4738	150050
Shanyang County	2012	Shangluo City	660700	5606	128900	660700	5606	128900
Shanyang County	2013	Shangluo City	807800	6474	146453	807800	6474	146453
Shanyang County	2014	Shangluo City	955100	7380	165230	955100	7380	165230
Shanyang County	2015	Shangluo City	1040500	7850	174620	1040500	7850	174620
Shanyang County	2016	Shangluo City	1213000	8501	192380	1213000	8501	192380
Shanyang County	2017	Shangluo City	1443500	.	196460	1443500	9152	196460
Shanyang County	2018	Shangluo City	1479530	.	186360	1479530	9803	186360
Shanyang County	2019	Shangluo City	1528780	.	202460	1528780	10454	202460
Shanyang County	2020	Shangluo City	1443240	.	218700	1443240	11105	218700
Shanyang County	2021	Shangluo City	1717490	.	220810	1717490	4776	220810
Zhen’an County	2012	Shangluo City	573700	5585	105658	573700	5585	105658
Zhen’an County	2013	Shangluo City	661900	6394	114976	661900	6394	114976
Zhen’an County	2014	Shangluo City	775000	7276	118900	775000	7276	118900
Zhen’an County	2015	Shangluo City	839100	7750	115449	839100	7750	115449
Zhen’an County	2016	Shangluo City	897900	8370	117770	897900	8370	117770
Zhen’an County	2017	Shangluo City	1060000	.	123594	1060000	8990	123594
Zhen’an County	2018	Shangluo City	1111990	.	121740	1111990	9610	121740
Zhen’an County	2019	Shangluo City	1058650	.	131880	1058650	10230	131880
Zhen’an County	2020	Shangluo City	880640	.	150290	880640	10850	150290
Zhen’an County	2021	Shangluo City	1002180	.	158550	1002180	4586	158550
Zhashui County	2012	Shangluo City	510900	5446	52765	510900	5446	52765
Zhashui County	2013	Shangluo City	609500	6306	62040	609500	6306	62040
Zhashui County	2014	Shangluo City	641800	7168	60580	641800	7168	60580
Zhashui County	2015	Shangluo City	661700	7622	63000	661700	7622	63000
Zhashui County	2016	Shangluo City	747900	8277	66300	747900	8277	66300
Zhashui County	2017	Shangluo City	749800	.	66200	749800	8932	66200
Zhashui County	2018	Shangluo City	745600	.	61600	745600	9587	61600
Zhashui County	2019	Shangluo City	837300	.	73800	837300	10242	73800
Zhashui County	2020	Shangluo City	765400	.	77300	765400	10897	77300
Zhashui County	2021	Shangluo City	972700	.	79200	972700	.	79200

## Sheet: Interpolated data
County/District	Year	City	C11	C12	C13	b21	b22	b23	b31	b32	b41	b42	b43
Chang’an District	2012	Xi’an City	44219	8.34062	31	548	65234	42	30456	59.1709	3626400	11107	300600
Chang’an District	2013	Xi’an City	43579	8.20808	31	1077	65577	44	30124	58.0271	3691460	12695	317573
Chang’an District	2014	Xi’an City	41980	8.06098	40	1606	65920	43	29920	52.2756	4206958	14206	336650
Chang’an District	2015	Xi’an City	41428	8.34906	41.5	1794	61000	43	27318	45.9219	5126913	15486	365213
Chang’an District	2016	Xi’an City	39355	8.44658	43	2122	60486	44	21888	48.8199	6080200	16741	384713
Chang’an District	2017	Xi’an City	32215	8.23405	39	2122	60377	35	17602	49.5506	7910300	17996	339487
Chang’an District	2018	Xi’an City	31229	5.00311	24	242	60268	35	16026	42.3985	9091100	19251	268900
Chang’an District	2019	Xi’an City	31253	5.04009	27	291	60159	36	15572	35.2464	10012100	20506	287300
Chang’an District	2020	Xi’an City	31277	5.07708	197	931	60050	37	15118	28.0943	11362500	21761	327600
Chang’an District	2021	Xi’an City	31301	5.11406	367	933	59941	38	14664	20.9422	12694500	23016	342200
Baqiao District	2012	Xi’an City	10511	5.81125	245553			18	10372	80.4425	2333000	13278
Baqiao District	2013	Xi’an City	9840	5.72866	279503			18	8705	81.2906	2690300	15203
Baqiao District	2014	Xi’an City	9241	5.7194	300728			18	8616	71.3758	2933000	16982
Baqiao District	2015	Xi’an City	8709	6.20863	307940			18	7798	58.2324	3322800	18891
Baqiao District	2016	Xi’an City	5242	10.028	327061			15.0471	7645	68.1399	3297800	20431
Baqiao District	2017	Xi’an City	4840	10.2572	364717			14	7484	68.616	4283500	21971
Baqiao District	2018	Xi’an City	4438	6.23547	311278			13	7121	57.0711	4807800	23511
Baqiao District	2019	Xi’an City	3715	6.64441	327267			12	2352	45.5261	4891900	25051
Baqiao District	2020	Xi’an City	2992	7.05336	342532			11.89	2729	33.9811	5420600	26591
Baqiao District	2021	Xi’an City	2269	7.46231	357797			11.78	3106	22.4362	5949300	28131
Yanta District	2012	Xi’an City	564		32760			4.0174	148	83.9125	8108300	14800
Yanta District	2013	Xi’an City	434		31763			3.195	122	83.8292	9387500	16724
Yanta District	2014	Xi’an City	434		26798			9.2415	115	73.6736	10661500	18648
Yanta District	2015	Xi’an City	434		3205			9.2155	108	62.1153	11582300	20572
Yanta District	2016	Xi’an City	434		-20388			6.2016	101	73.0035	12354300	22496
Yanta District	2017	Xi’an City	434		-43981			6.1955	94	77.1035	15211500	24420
Yanta District	2018	Xi’an City	434		-67574			5.532	87	63.0812	17579800	26344
Yanta District	2019	Xi’an City	434		-91167			4.0174	80	49.059	22710100	28268
Yanta District	2020	Xi’an City	434		-114760			2.5028	73	35.0368	25107200	30192
Yanta District	2021	Xi’an City	434		-138353			0.988199	66	21.0146	27504300	32116
Weiyang District	2012	Xi’an City	1468	10.6914	36525			5	808	82.9295	5167300	14562
Weiyang District	2013	Xi’an City	1386	5.78066	25320			4	1642	83.4542	6010900	16455
Weiyang District	2014	Xi’an City	1047	3.81757	19090			5	1524	73.642	6752000	18364
Weiyang District	2015	Xi’an City	833	2.36254	25786			5	1418	59.3136	7252100	19824
Weiyang District	2016	Xi’an City	404	1.9802	20405			5	281	75.6727	7728800	21294
Weiyang District	2017	Xi’an City	121	0.92562	13836			5	239	74.5572	8445300	22764
Weiyang District	2018	Xi’an City	121	0.504132	8814			4	204	61.9307	9648300	24234
Weiyang District	2019	Xi’an City	106	0.669811	6419			4	169	49.3042	12550700	25704
Weiyang District	2020	Xi’an City	91	0.83549	4024			4	178	36.6777	13194300	27174
Weiyang District	2021	Xi’an City	76	1.00117	1629			4	187	24.0511	13837900	28644
Beilin District	2012	Xi’an City								85.3217	5042800
Beilin District	2013	Xi’an City								84.713	5257600
Beilin District	2014	Xi’an City								75.8739	5917200
Beilin District	2015	Xi’an City								59.5913	6766500
Beilin District	2016	Xi’an City								77.5348	7416800
Beilin District	2017	Xi’an City								76.4478	8734900
Beilin District	2018	Xi’an City								63.287	9652600
Beilin District	2019	Xi’an City								50.1261	10139700
Beilin District	2020	Xi’an City								36.9652	10604700
Beilin District	2021	Xi’an City								23.8044	11069700
Xincheng District	2012	Xi’an City								84.469	4302200
Xincheng District	2013	Xi’an City								84.2448	4717500
Xincheng District	2014	Xi’an City								74.9724	5060500
Xincheng District	2015	Xi’an City								57.6966	5041200
Xincheng District	2016	Xi’an City								76.7103	5406600
Xincheng District	2017	Xi’an City								74.7483	6161000
Xincheng District	2018	Xi’an City								62.6034	6506400
Xincheng District	2019	Xi’an City								50.4586	6059300
Xincheng District	2020	Xi’an City								38.3138	5790500
Xincheng District	2021	Xi’an City								26.169	5521700
Lianhu District	2012	Xi’an City								84.6444	4794000
Lianhu District	2013	Xi’an City								84.05	5266800
Lianhu District	2014	Xi’an City								74.8472	5525300
Lianhu District	2015	Xi’an City								59.175	5764100
Lianhu District	2016	Xi’an City								79.6139	6219100
Lianhu District	2017	Xi’an City								76.6778	7494700
Lianhu District	2018	Xi’an City								63.875	8207300
Lianhu District	2019	Xi’an City								51.0722	7890500
Lianhu District	2020	Xi’an City								38.2694	8149500
Lianhu District	2021	Xi’an City								25.4667	8408500
Lintong District	2012	Xi’an City	46994	7.48342	468170			55.3638	39101	75.8739	2115300	10685
Lintong District	2013	Xi’an City	46873	6.97222	515993			56.8816	39256	75.6795	2265800	12160
Lintong District	2014	Xi’an City	46492	6.83709	538221			60.8868	39641	66.9187	2314500	13595
Lintong District	2015	Xi’an City	46246	7.10626	551556			61.2966	39813	55.7569	1923400	15164
Lintong District	2016	Xi’an City	45926	6.9001	569391			46.6695	39949	63.8301	1831100	16389
Lintong District	2017	Xi’an City	45862	6.64548	588206			40.8257	40008	62.6268	2210100	17614
Lintong District	2018	Xi’an City	45795	7.186	601608			40.4008	40674	53.1384	2375200	18839
Lintong District	2019	Xi’an City	44147	7.53408	666124			42.2225	39222	43.65	2426900	20064
Lintong District	2020	Xi’an City	42499	7.88216	730640			42.3218	46683	34.1616	2525300	21289
Lintong District	2021	Xi’an City	40851	8.23023	795156			42.4211	54144	24.6732	2623700	22514
Gaoling District	2012	Xi’an City	15244	13.1361	334939	1195	24226	26	106535	77.0687	2281600	10673	203300
Gaoling District	2013	Xi’an City	15197	13.042	399495	1474	24932	27	76274	79.4822	2799400	12167	221207
Gaoling District	2014	Xi’an City	15126	12.5859	468141	1753	25638	28	46013	69.8036	3000900	13615	259555
Gaoling District	2015	Xi’an City	15076	12.7857	495452	1354	27193	29	15752	53.7068	2914000	15191	276959
Gaoling District	2016	Xi’an City	37467	5.01185	555928	1854	26593	25	14005	64.4192	3002400	16431	285152
Gaoling District	2017	Xi’an City	14605	12.2711	607588	1855	26340	21	13885	64.9907	3771000	17671	326200
Gaoling District	2018	Xi’an City	14807	8.34457	482906	4800	26087	22	13297	54.5783	3784500	18911	249900
Gaoling District	2019	Xi’an City	14768	8.32381	528930	1874	25834	23	12802	44.1658	3744400	20151	271900
Gaoling District	2020	Xi’an City	14729	8.30305	574954	2808	25581	24	12307	33.7534	3744900	21391	308400
Gaoling District	2021	Xi’an City	14690	8.28229	620978	1525	25328	25	11812	23.3409	3847200	22631	318000
Huyi District	2012	Xi’an City	38160	8.22065	407108	1090	58650	43	43780	55.3865	1421300	9654	253700
Huyi District	2013	Xi’an City	38003	7.98358	447149	1179	58666	46	41416	54.102	1552400	10899	253187
Huyi District	2014	Xi’an City	37535	7.88616	481686	1268	58682	50	39052	47.577	1619600	12218	271973
Huyi District	2015	Xi’an City	37521	8.12726	496155	1289	55666	50	36688	42.9356	1508400	13616	275729
Huyi District	2016	Xi’an City	32881	9.05617	515503	1233	55728	21	34324	45.1355	1628200	14638	285963
Huyi District	2017	Xi’an City	35244	7.6325	496405	1290	54599	49	31960	44.8478	1974100	15660	277412
Huyi District	2018	Xi’an City	33685	5.67953	447692	1137	53470	50	31751	39.2082	2172600	16682	256500
Huyi District	2019	Xi’an City	33647	5.822	484760	1002	52341	50	30730	33.5685	1802300	17704	277100
Huyi District	2020	Xi’an City	33609	5.96448	521828	1940	51212	50	30690	27.9289	2336100	18726	311000
Huyi District	2021	Xi’an City	33571	6.10695	558896	1990	50083	50	30650	22.2893	2660500	19748	319800
Lantian County	2012	Xi’an City	40400	7.17225	401514	14	25716	29	36350	45.6595	957300	7824	244500
Lantian County	2013	Xi’an City	39879	6.63507	436071	45	26133	30	36091	44.1644	1068900	8833	244555
Lantian County	2014	Xi’an City	39733	6.3071	462420	76	26550	31	47017	40.3143	1184500	9911	259058
Lantian County	2015	Xi’an City	39680	6.56305	465601	186	26560	31	46208	37.564	1130800	11084	260100
Lantian County	2016	Xi’an City	14993	17.056	492519	275	26750	34	46235	34.6323	1224400	12082	275900
Lantian County	2017	Xi’an City	39248	6.46785	539025	300	27485	25	46769	33.7864	1434900	13080	301500
Lantian County	2018	Xi’an City	39125	4.35407	494077	269	28220	25	46737	29.3827	1578300	14078	316600
Lantian County	2019	Xi’an City	38997	4.386	517089	3617	28955	25	45932	24.979	1492300	15076	283500
Lantian County	2020	Xi’an City	38869	4.41794	540101	242	29690	25	45668	20.5752	1429600	16074	323800
Lantian County	2021	Xi’an City	38741	4.44987	563113	800	30425	25	45404	16.1715	1517000	17072	330900
Zhouzhi County	2012	Xi’an City	33257	7.31148	412820	156	22747	42	46965	44.9028	782800	7733	253940
Zhouzhi County	2013	Xi’an City	33263	6.93563	460093	228	30340	43	46989	40.8695	876600	8870	263370
Zhouzhi County	2014	Xi’an City	33269	6.7617	482477	300	37933	45	33755	37.3729	972000	9961	276272
Zhouzhi County	2015	Xi’an City	32957	7.0308	508904	140	37723	48	48221	32.3165	1040600	11148	295400
Zhouzhi County	2016	Xi’an City	39473	5.63917	572627	144	42140	48	52778	32.7339	1149900	12207	331700
Zhouzhi County	2017	Xi’an City	32840	6.28977	591455	166	36173	33	52752	30.9729	1342600	13266	339100
Zhouzhi County	2018	Xi’an City	32723	3.63949	589596	194	30206	35	52774	27.3134	1462700	14325	329400
Zhouzhi County	2019	Xi’an City	32625	3.68448	646428	199	24239	34	52414	23.6539	1371500	15384	358800
Zhouzhi County	2020	Xi’an City	32527	3.72946	703260	482	18272	33	52412	19.9944	1394400	16443	403900
Zhouzhi County	2021	Xi’an City	32429	3.77445	760092	556	12305	32	52410	16.3349	1463900	17502	422400
Yanliang District	2012	Xi’an City	15792	5.14932	290460			17	19275	80.0033	1414900	13403
Yanliang District	2013	Xi’an City	15696	5.4389	324413			19	21696	78.6671	1689600	15212
Yanliang District	2014	Xi’an City	15632	5.18187	354330			19	24039	70.7716	1947200	17007
Yanliang District	2015	Xi’an City	15478	5.69912	368854			19	25050	57.2749	1918500	18850
Yanliang District	2016	Xi’an City	15457	5.61493	381618			17	25766	66.4086	1939400	20262
Yanliang District	2017	Xi’an City	15285	5.54962	412635			16	27921	66.2383	2402100	21674
Yanliang District	2018	Xi’an City	15136	7.94635	446310			13	28240	56.8658	2501000	23086
Yanliang District	2019	Xi’an City	15178	7.57504	487524			11	30042	47.4934	2550600	24498
Yanliang District	2020	Xi’an City	15220	7.20373	528738			9	31599	38.121	2491000	25910
Yanliang District	2021	Xi’an City	15262	6.83242	569952			7	33156	28.7486	2431400	27322
Wangyi District	2012	Tongchuan City	3891	2.89283	17870			6	1837	46.8897	641200	8068
Wangyi District	2013	Tongchuan City	3938	2.58558	19950			7	1836	51.7987	731700	9189
Wangyi District	2014	Tongchuan City	3977	2.50616	21575			7	1834	44.6561	821600	10398
Wangyi District	2015	Tongchuan City	3988	2.64769	22263			7	1605	39.5774	838800	8499
Wangyi District	2016	Tongchuan City	5333	1.91918	23179			4	1529	35.8542	877400	9201
Wangyi District	2017	Tongchuan City	5327	1.94537	23925			3	1526	31.8832	1002300	9903
Wangyi District	2018	Tongchuan City	5300	1.78811	22949			3	1497	29.3419	872400	10605
Wangyi District	2019	Tongchuan City	5285	1.60889	25777			3	1472	26.8006	848200	11307
Wangyi District	2020	Tongchuan City	5270	1.42967	28605			3	1447	24.2594	927500	12009
Wangyi District	2021	Tongchuan City	5255	1.25045	31433			3	1422	21.7181	1006800	12711
Yintai District	2012	Tongchuan City	8924	4.30861	74923			9	8586	34.6705	700200	6863
Yintai District	2013	Tongchuan City	9269	4.03075	84041			11	6519	38.9397	822600	7879
Yintai District	2014	Tongchuan City	9208	3.91953	90846			11	7216	32.8993	779400	8934
Yintai District	2015	Tongchuan City	9223	3.86978	92086			12	8385	29.355	660300	8175
Yintai District	2016	Tongchuan City	9333	3.8785	96681			6	7861	22.6679	632600	8919
Yintai District	2017	Tongchuan City	9550	3.77864	98900			6	8131	20.653	643400	9663
Yintai District	2018	Tongchuan City	9435	4.21876	70674			7	7779	20.6449	767500	10407
Yintai District	2019	Tongchuan City	9456	4.0827	76753			7	8040	20.6368	617500	11151
Yintai District	2020	Tongchuan City	9477	3.94664	82832			7	8301	20.6286	631600	11895
Yintai District	2021	Tongchuan City	9498	3.81058	88911			7	8562	20.6205	645700	12639
Yaozhou District	2012	Tongchuan City	32624	2.58708	160530	457	19111	20	29347	40.164	1275600	7975	89020
Yaozhou District	2013	Tongchuan City	32335	2.59221	179850	576	19499	22	30238	42.5337	1407100	9099	96098
Yaozhou District	2014	Tongchuan City	32154	2.80982	194054	695	19887	23	30320	37.2975	1507800	10227	104245
Yaozhou District	2015	Tongchuan City	32040	2.74516	196590	588	21021	24	32049	33.0479	1421100	9386	104506
Yaozhou District	2016	Tongchuan City	31815	2.80522	206613	245	21310	13	31436	29.1797	1275000	10181	110008
Yaozhou District	2017	Tongchuan City	31644	2.8436	212775	196	1600	14	33047	25.9752	1459800	10976	113186
Yaozhou District	2018	Tongchuan City	31690	2.50066	245015	196	-18110	13	32752	25.4809	1333890	11771	136630
Yaozhou District	2019	Tongchuan City	28415	2.57128	225379	220	-37820	13	27512	24.9866	1749100	12566	149000
Yaozhou District	2020	Tongchuan City	25140	2.6419	205743	225	-57530	13	22272	24.4923	1897558	13361	171267
Yaozhou District	2021	Tongchuan City	21865	2.71252	186107	233	-77240	13	17032	23.998	2160840	14156	184875
Yijun County	2012	Tongchuan City	19134	5.09282	92575	86	5712	9	12588	34.2783	212100	6477	52817
Yijun County	2013	Tongchuan City	19132	5.20829	103544	84	7300	11	12589	40.414	258400	7423	56623
Yijun County	2014	Tongchuan City	19302	5.05316	112333	82	8888	12	12559	32.146	295400	8417	61317
Yijun County	2015	Tongchuan City	19451	5.18133	111304	95	8387	12	12546	29.5339	325300	7888	60247
Yijun County	2016	Tongchuan City	20681	5.04608	116691	71	10370	9	12149	25.5476	331100	8547	63271
Yijun County	2017	Tongchuan City	21987	4.84004	119934	69	10370	10	12532	24.4288	380500	9206	64710
Yijun County	2018	Tongchuan City	22987	6.92861	109518	119	10370	11	12721	24.2933	305630	9865	59740
Yijun County	2019	Tongchuan City	25137	6.45324	115138	122	10370	12	11437	24.1579	331865	10524	62721
Yijun County	2020	Tongchuan City	27287	5.97786	120758	79	10370	13	10153	24.0225	360810	11183	71530
Yijun County	2021	Tongchuan City	29437	5.50249	126378	76	10370	14	8869	23.8871	427400	11842	79900
Weibin District	2012	Baoji City	6504	4.07857	63308			8	7224	48.5683	4071600	10208
Weibin District	2013	Baoji City	6389	3.44342	69557			8	7378	44.9241	4272500	11596
Weibin District	2014	Baoji City	5969	3.35065	74374			8	7231	40.5049	4457000	13069
Weibin District	2015	Baoji City	5934	3.35288	77360			7	2072	37.6362	4699600	11587
Weibin District	2016	Baoji City	5565	2.85103	77834			6	5010	38.0124	5005000	12514
Weibin District	2017	Baoji City	5427	2.48977	80909			6	5149	35.1727	5311700	13441
Weibin District	2018	Baoji City	5104	2.30956	79619			6	4676	31.0109	5463000	14368
Weibin District	2019	Baoji City	5080	1.9935	86124			6	4217	26.849	5211400	15295
Weibin District	2020	Baoji City	5056	1.67745	92629			6	3758	22.6871	5353900	16222
Weibin District	2021	Baoji City	5032	1.36139	99134			6	3299	18.5252	5496400	17149
Jintai District	2012	Baoji City	10748	3.42268	37857			13	6221	62.3551	2412500	9290
Jintai District	2013	Baoji City	10613	3.21436	41236			14	6146	60.7564	2757300	10581
Jintai District	2014	Baoji City	10176	3.24479	43570			14	5431	55.7033	2954500	11883
Jintai District	2015	Baoji City	10122	3.64217	45197			14	5081	50.9274	3042300	10523
Jintai District	2016	Baoji City	10199	3.48966	47906			12	4736	52.4752	3385000	11365
Jintai District	2017	Baoji City	10127	3.45611	48336			13	4781	49.631	3578100	12207
Jintai District	2018	Baoji City	10065	3.80219	43330			13	4489	44.5116	3706500	13049
Jintai District	2019	Baoji City	9903	3.60456	46448			13	4489	39.3921	3649500	13891
Jintai District	2020	Baoji City	9741	3.40694	49566			13	4489	34.2726	3625500	14733
Jintai District	2021	Baoji City	9579	3.20932	52684			13	4489	29.1531	3601500	15575
Chencang District	2012	Baoji City	45170	5.32566	369445	1642	32626	35	31252	50.4775	1515400	8678	215351
Chencang District	2013	Baoji City	45084	5.1255	403722	1598	32713	37	31402	48.5361	1629100	9850	231175
Chencang District	2014	Baoji City	44968	4.99911	419956	1554	32800	41	30721	42.7662	1736400	11081	239216
Chencang District	2015	Baoji City	44983	5.18796	431498	1596	32900	43	31190	39.7566	1477200	9823	246346
Chencang District	2016	Baoji City	44600	5.08294	449627	1915	33000	38	31052	40.9402	1647800	10638	257312
Chencang District	2017	Baoji City	44450	5.0425	456435	968	34067	39	31731	37.7964	1913800	11453	260421
Chencang District	2018	Baoji City	44321	4.45103	400193	577	35134	41	32585	33.4607	2128441	12268	224288
Chencang District	2019	Baoji City	43576	4.65926	449269	600	36201	41	30394	29.1249	2144061	13083	252164
Chencang District	2020	Baoji City	42831	4.8675	498345	622	37268	41	28203	24.7891	2205587	13898	286668
Chencang District	2021	Baoji City	42086	5.07573	547421	655	38335	41	26012	20.4534	2413681	14713	295459
Fengxiang County	2012	Baoji City	46181	5.8554	338535	1438	42384	38	37833	52.4997	1430100	9159	209002
Fengxiang County	2013	Baoji City	46335	5.61234	371181	1438	43407	41	39781	49.7007	1619600	10423	221346
Fengxiang County (Fengxiang District)	2014	Baoji City	46332	5.53296	398017	1438	44430	43	42299	45.8621	1818100	11716	241720
Fengxiang County	2015	Baoji City	45813	5.76336	406835	1238	43330	44	43274	41.2944	1877600	10375	242161
Fengxiang County	2016	Baoji City	45724	5.60841	421979	1162	39065	36	43220	41.7849	2020400	11225	250497
Fengxiang County	2017	Baoji City	45587	5.55312	432245	1154	39066	37	43400	39.0755	2088500	12075	253099
Fengxiang County	2018	Baoji City	45903	5.59475	402375	1330	39067	37	43089	34.5044	2167995	12925	230519
Fengxiang County	2019	Baoji City	45659	5.58503	438770	1072	39068	6	42975	29.9333	2236551	13775	250196
Fengxiang County	2020	Baoji City	45415	5.57531	475165	725	39069	-25	42861	25.3622	2397666	14625	287006
Fengxiang County	2021	Baoji City	45171	5.56559	511560	664	39070	-56	42747	20.7911	2642959	15475	296176
Qishan County	2012	Baoji City	35237	7.80711	323161	1597	42464	24	22623	60.5973	1340100	9153	205104
Qishan County	2013	Baoji City	35237	7.52221	351924	1597	42472	26	24680	57.5328	1440900	10435	224097
Qishan County	2014	Baoji City	35237	7.54272	375889	1597	42480	38	24571	52.5428	1491000	11791	225449
Qishan County	2015	Baoji City	35248	7.66137	384523	1567	42350	37	24990	48.1931	1438500	10483	229643
Qishan County	2016	Baoji City	35289	7.43314	396887	1413	42350	31	24652	47.7574	1561100	11343	237439
Qishan County	2017	Baoji City	35286	7.33007	408461	1413	42350	34	24404	47.0875	1886300	12203	243056
Qishan County	2018	Baoji City	35284	6.41214	390555	1124	42350	34	24214	41.1097	1930974	13063	220423
Qishan County	2019	Baoji City	35283	6.34368	422256	1192	42350	38	24667	35.132	1793382	13923	239779
Qishan County	2020	Baoji City	35282	6.27522	453957	1354	42350	42	25120	29.1542	1690945	14783	271348
Qishan County	2021	Baoji City	35281	6.20675	485658	1354	42350	46	25573	23.1764	1747059	15643	288859
Fufeng County	2012	Baoji City	33199	8.44983	299723	29	20843	40	54736	66.6712	818500	7565	176378
Fufeng County	2013	Baoji City	32715	8.34632	329922	104	38521	42	52866	64.6021	951300	8647	185938
Fufeng County	2014	Baoji City	32395	8.19614	350702	179	56199	43	50924	58.4702	1005700	9736	197171
Fufeng County	2015	Baoji City	31802	8.83271	361807	170	42487	44	50504	52.9205	978700	8646	203762
Fufeng County	2016	Baoji City	31177	8.75498	374923	108	40333	36	49933	53.8735	1081600	9363	210596
Fufeng County	2017	Baoji City	30838	8.74126	383283	115	46400	42	48329	53.9076	1246500	10080	212756
Fufeng County	2018	Baoji City	30611	8.40714	361095	140	52467	44	48616	47.6428	1398717	10797	208194
Fufeng County	2019	Baoji City	30548	8.38575	379270	208	58534	35	48474	41.378	1471413	11514	216737
Fufeng County	2020	Baoji City	30485	8.36437	397445	362	64601	26	48332	35.1133	1545066	12231	245087
Fufeng County	2021	Baoji City	30422	8.34298	415620	291	70668	17	48190	28.8485	1735681	12948	264849
Mei County	2012	Baoji City	23157	5.79466	290770	577	8566	19	40480	58.4099	771900	8313	151823
Mei County	2013	Baoji City	23188	5.43514	331773	583	15440	20	41394	54.4136	905700	9527	180610
Mei County	2014	Baoji City	23161	5.44765	363300	589	22314	22	41974	49.3319	1046300	10755	203700
Mei County	2015	Baoji City	23236	5.30573	375668	590	25330	23	43974	44.9308	1069100	9590	204416
Mei County	2016	Baoji City	23175	5.07387	386713	612	25330	22	44025	45.6446	1155100	10386	209760
Mei County	2017	Baoji City	23173	5.00941	390844	616	25330	24	44096	43.2718	1289200	11182	211393
Mei County	2018	Baoji City	23171	3.12895	382767	236	25330	25	44556	38.8681	1369809	11978	223515
Mei County	2019	Baoji City	23121	3.16716	415091	238	25330	42	44641	34.4645	1612147	12774	239216
Mei County	2020	Baoji City	23071	3.20537	447415	288	25330	59	44726	30.0609	1770147	13570	281418
Mei County	2021	Baoji City	23021	3.24358	479739	371	25330	76	44811	25.6573	1997975	14366	316335
Long County	2012	Baoji City	35436	3.12685	266633	109	20135	15	12711	39.2303	433000	6740	162519
Long County	2013	Baoji City	35479	2.84709	286761	115	20258	16	13277	40.0534	498800	7644	158051
Long County	2014	Baoji City	35442	2.82436	305299	121	20381	17	13492	34.0574	571600	8568	166059
Long County	2015	Baoji City	35413	2.97151	313671	99	15087	18	13609	31.1575	597800	7581	171335
Long County	2016	Baoji City	35368	2.92112	328986	138	16953	15	13493	34.2006	675500	8226	178828
Long County	2017	Baoji City	35360	2.82805	346775	154	15680	18	14488	28.6898	848200	8871	186579
Long County	2018	Baoji City	35341	2.93348	316174	78	14407	18	14520	26.1194	974213	9516	171201
Long County	2019	Baoji City	35322	2.95272	343972	198	13134	25	14189	23.5491	915529	10161	186364
Long County	2020	Baoji City	35303	2.97196	371770	198	11861	32	13858	20.9787	986618	10806	216450
Long County	2021	Baoji City	35284	2.99121	399568	198	10588	39	13527	18.4083	1088482	11451	234176
Qianyang County	2012	Baoji City	18574	3.29924	140736	529	6902	12	11709	48.2956	259400	7007	88356
Qianyang County	2013	Baoji City	18567	2.9651	154688	591	8467	14	12602	48.8389	310100	7938	95202
Qianyang County	2014	Baoji City	18552	3.03455	160611	653	10032	14	12955	42.9703	350600	8955	91816
Qianyang County	2015	Baoji City	18599	3.16727	168664	653	8980	15	12551	39.189	411100	7915	95697
Qianyang County	2016	Baoji City	18677	3.03619	181288	653	8980	11	12363	41.6361	486600	8572	103354
Qianyang County	2017	Baoji City	18637	2.95235	184024	663	9060	12	12325	37.4529	543400	9229	104669
Qianyang County	2018	Baoji City	18584	3.09164	164953	691	9140	12	11804	33.9423	597588	9886	91812
Qianyang County	2019	Baoji City	18186	3.14412	186395	249	9220	19	12448	30.4316	676914	10543	103453
Qianyang County	2020	Baoji City	17788	3.19661	207837	231	9300	26	13092	26.9209	738229	11200	119976
Qianyang County	2021	Baoji City	17390	3.24909	229279	237	9380	33	13736	23.4103	820052	11857	121233
Linyou County	2012	Baoji City	29530	2.14304	95471	240	8471	6	23197	34.3482	411500	6696	62375
Linyou County	2013	Baoji City	30252	1.99114	102609	210	8383	7	23604	32.6308	505900	7580	63069
Linyou County	2014	Baoji City	30045	2.20756	107561	180	8295	8	14824	29.0302	557500	8512	65891
Linyou County	2015	Baoji City	30057	2.4214	111414	150	8102	8	15242	25.0064	644800	7518	67079
Linyou County	2016	Baoji City	30057	2.61363	117637	150	7279	5	14782	26.3949	711100	8157	71254
Linyou County	2017	Baoji City	29546	2.49736	120994	141	7619	5	14785	22.1339	1065400	8796	72960
Linyou County	2018	Baoji City	29464	2.49535	109008	23	7959	5	14800	19.6714	1097200	9435	59800
Linyou County	2019	Baoji City	29205	2.54696	131245	76	8299	12	14771	17.2089	1406100	10074	67800
Linyou County	2020	Baoji City	28946	2.59857	153482	69	8639	19	14742	14.7463	1282600	10713	77400
Linyou County	2021	Baoji City	28687	2.65018	175719	76	8979	26	14713	12.2838	1790000	11352	85300
Feng County	2012	Baoji City	9714	2.95594	98099	29	719	10	5144	31.9064	1108000	9061	56348
Feng County	2013	Baoji City	9645	2.28357	111174	30	753	11	5027	29.6506	1302100	10402	60073
Feng County	2014	Baoji City	9624	2.32637	118555	31	787	11	5130	25.9101	1456100	11765	63719
Feng County	2015	Baoji City	9631	2.45426	123185	31	800	12	5145	20.9519	1484500	10236	66515
Feng County	2016	Baoji City	9620	2.42017	128764	31	1200	6	5426	22.1934	1707400	11055	68760
Feng County	2017	Baoji City	9585	2.39958	132856	35	1617	6	5438	19.1832	1801000	11874	73993
Feng County	2018	Baoji City	9439	2.52442	127889	37	2034	6	5283	16.7423	1337800	12693	70900
Feng County	2019	Baoji City	9368	2.5538	149771	30	2451	5	6344	14.3014	776599	13512	84346
Feng County	2020	Baoji City	9297	2.58318	171653	48	2868	4	7405	11.8605	798475	14331	95042
Feng County	2021	Baoji City	9226	2.61256	193535	53	3285	3	8466	9.41963	914957	15150	98283
Taibai County	2012	Baoji City	6513	1.12559	76011	9	282	6	4522	25.9238	137900	6610	46102
Taibai County	2013	Baoji City	6482	0.982721	85366	10	273	7	4290	23.0461	158300	7476	51661
Taibai County	2014	Baoji City	6460	0.991486	91208	11	264	7	4384	20.2006	171100	8463	52932
Taibai County	2015	Baoji City	6475	1.17251	99085	13	264	8	4200	15.9263	196000	7540	57560
Taibai County	2016	Baoji City	6498	1.13573	102951	13	264	6	4206	16.2164	209100	8181	58526
Taibai County	2017	Baoji City	6470	1.09104	113296	19	273	6	4322	13.3089	224500	8822	64065
Taibai County	2018	Baoji City	6475	1.03799	114573	76.5	282	6	4226	11.917	276957	9463	66393
Taibai County	2019	Baoji City	6465	1.04501	127614	134	291	6	4210	10.5252	302589	10104	69074
Taibai County	2020	Baoji City	6455	1.05203	140655	134	300	6	4194	9.13341	374673	10745	87834
Taibai County	2021	Baoji City	6445	1.05905	153696	132	309	6	4178	7.74159	455471	11386	87140
Qindu District	2012	Xianyang City	10335	6.81064	238008			20	15140	79.3772	3300400	9355
Qindu District	2013	Xianyang City	9962	6.30094	270448			22	14189	77.5848	3752900	10787
Qindu District	2014	Xianyang City	8891	6.62715	285600			23	13447	69.702	4250100	12211
Qindu District	2015	Xianyang City	8524	7.04024	299386			24	13434	59.5084	4665400	11398
Qindu District	2016	Xianyang City	8524	6.58353	316937			19	13158	71.3608	5196000	12321
Qindu District	2017	Xianyang City	3573	8.41198	131851			19	7863	71.186	4010000	13244
Qindu District	2018	Xianyang City	3611	6.87732	130344			11	7483	60.2292	3828200	14167
Qindu District	2019	Xianyang City	3555	6.96259	134540			11	6931	49.2724	3438500	15090
Qindu District	2020	Xianyang City	3499	7.04786	138736			11	6379	38.3156	3619400	16013
Qindu District	2021	Xianyang City	3443	7.13313	142932			11	5827	27.3588	3800300	16936
Weicheng District	2012	Xianyang City	13124	8.19826	200596			19	10039	77.0604	2664400	9218
Weicheng District	2013	Xianyang City	12660	7.68065	223316			22	9615	76.3547	3052200	10582
Weicheng District	2014	Xianyang City	12421	7.48426	232705			23	8393	68.1906	3164300	11979
Weicheng District	2015	Xianyang City	12100	7.8443	240934			24	9187	54.7392	3130900	11183
Weicheng District	2016	Xianyang City	11964	7.43405	249961			14	8661	68.7921	3449000	12053
Weicheng District	2017	Xianyang City	11828	7.02381	258988			14	8135	67.706	3039200	12923
Weicheng District	2018	Xianyang City	11692	6.61356	268015			14	7609	56.8977	3787200	13793
Weicheng District	2019	Xianyang City	11556	6.20332	277042			14	7083	46.0894	2565900	14663
Weicheng District	2020	Xianyang City	11420	5.79307	286069			14	6557	35.2811	2745700	15533
Weicheng District	2021	Xianyang City	11284	5.38283	295096			14	6031	24.4728	2925500	16403
Sanyuan County	2012	Xianyang City	33208	6.2185	450714	864	36099	24	32220	73.7324	1204800	8383	261160
Sanyuan County	2013	Xianyang City	33129	6.03704	488895	884	38667	28	32300	74.9021	1408100	9607	274062
Sanyuan County	2014	Xianyang City	33055	5.90304	509048	904	41235	29	28160	69.3431	1601300	10846	291714
Sanyuan County	2015	Xianyang City	32980	6.09797	514073	1061	40023	31	29024	55.8947	1776300	10135	298715
Sanyuan County	2016	Xianyang City	32902	5.95739	530811	1063	40036	23	28268	63.2331	1935100	10961	306444
Sanyuan County	2017	Xianyang City	32836	5.93803	541711	1788	42958	25	29175	61.3254	2360900	11787	309069
Sanyuan County	2018	Xianyang City	32751	5.76825	473577	8243	45880	25	28542	52.9408	2397556	12613	265263
Sanyuan County	2019	Xianyang City	32730	5.75982	512923	5476	48802	25	29203	44.5563	2153480	13439	281000
Sanyuan County	2020	Xianyang City	32709	5.75139	552269	5633	51724	25	29864	36.1718	2077589	14265	330562
Sanyuan County	2021	Xianyang City	32688	5.74297	591615	5859	54646	25	30525	27.7873	2360850	15091	356900
Jingyang County	2012	Xianyang City	44397	5.79478	632757	8814	52466	40	40253	71.027	1180200	8379	386382
Jingyang County	2013	Xianyang City	43757	5.54069	701427	9220	51088	46	38800	71.2608	1350100	9561	408695
Jingyang County	2014	Xianyang City	43100	5.56471	737796	9626	49710	47	36610	65.0668	1520300	10794	438354
Jingyang County	2015	Xianyang City	42459	5.82237	756662	9636	49812	49	34150	53.7453	1602300	10106	449989
Jingyang County	2016	Xianyang City	41995	5.73394	791330	6768	49667	36	34772	60.4671	1790400	10940	464240
Jingyang County	2017	Xianyang City	30607	5.33283	528502	2498	41867	39	25168	58.1753	759600	11774	312242
Jingyang County	2018	Xianyang City	30807	5.22657	476980	306	34067	37	22190	50.9796	754310	12608	280000
Jingyang County	2019	Xianyang City	30807	5.22797	507076	2394	26267	38	27248	43.7839	757300	13442	292650
Jingyang County	2020	Xianyang City	30807	5.22936	537172	2542	18467	39	32306	36.5882	808970	14276	331740
Jingyang County	2021	Xianyang City	30807	5.23076	567268	2585	10667	40	37364	29.3925	1167780	15110	405060
Qian County	2012	Xianyang City	51258	5.23233	426941	84	70400	32	274558	63.7676	1080900	8314	254753
Qian County	2013	Xianyang City	49915	5.07064	465953	84	64200	37	275625	61.8841	1272100	9495	278552
Qian County	2014	Xianyang City	48443	5.51322	513509	84	58000	38	90307	58.7462	1450400	10700	296239
Qian County	2015	Xianyang City	46630	5.63794	535346	94	58036	39	91008	50.231	1507400	10007	304620
Qian County	2016	Xianyang City	46642	5.48679	556117	113	60666	29	91502	50.7749	1623800	10773	316721
Qian County	2017	Xianyang City	46959	5.35823	564452	124	59203	29	112176	51.799	1789400	11539	321138
Qian County	2018	Xianyang City	46917	5.42405	504717	271	57740	29	111760	44.2338	1736460	12305	287060
Qian County	2019	Xianyang City	47064	5.30582	525600	95	56277	30	111663	36.6686	1716220	13071	302180
Qian County	2020	Xianyang City	47211	5.18759	546483	103	54814	31	111566	29.1035	1556210	13837	352730
Qian County	2021	Xianyang City	47358	5.06936	567366	126	53351	32	111469	21.5383	1758100	14603	389300
Liquan County	2012	Xianyang City	30850	4.16483	665289	-32	16572	32	92700	61.41	1086200	8381	426842
Liquan County	2013	Xianyang City	30033	4.09926	729211	76	16579	38	110800	61.0831	1278600	9571	464901
Liquan County	2014	Xianyang City	28865	4.1587	781606	184	16586	39	108311	57.9672	1450200	10796	501987
Liquan County	2015	Xianyang City	28876	4.33363	796999	204	16572	40	106940	49.7197	1518300	10089	507949
Liquan County	2016	Xianyang City	28874	4.20496	851118	210	16583	19	98691	51.2726	1641500	10922	540365
Liquan County	2017	Xianyang City	28866	4.16261	887487	238	16425	20	89582	48.7969	1741700	11755	546388
Liquan County	2018	Xianyang City	28841	4.01716	762998	290	16267	21	82455	42.274	1605154	12588	473923
Liquan County	2019	Xianyang City	28823	3.89557	812990	466	16109	21	83255	35.7511	1535000	13421	499000
Liquan County	2020	Xianyang City	28805	3.77398	862982	465	15951	21	84055	29.2282	1561800	14254	528900
Liquan County	2021	Xianyang City	28787	3.65238	912974	658	15793	21	84855	22.7054	1721301	15087	561663
Yongshou County	2012	Xianyang City	19256	4.40045	195466	4	15784	14	24220	44.9743	348700	6391	123842
Yongshou County	2013	Xianyang City	19553	4.19373	250900	4	15784	17	29727	45.998	413300	7317	133062
Yongshou County	2014	Xianyang City	20402	3.97108	273123	4	15784	18	30806	41.7668	448300	8232	143000
Yongshou County	2015	Xianyang City	20405	4.36501	292511	4	15784	20	30651	35.1146	500000	7720	150110
Yongshou County	2016	Xianyang City	20472	4.27926	312678	5	15283	17	30646	35.9975	586100	8419	159780
Yongshou County	2017	Xianyang City	20538	4.22125	329220	5	15285	20	30638	31.9697	731100	9118	169458
Yongshou County	2018	Xianyang City	20546	4.12182	355747	5	15287	21	30293	28.1921	854257	9817	184045
Yongshou County	2019	Xianyang City	20555	3.92323	378301	12	15289	23	30334	24.4144	843570	10516	200150
Yongshou County	2020	Xianyang City	20564	3.72464	400855	69	15291	25	30375	20.6368	846230	11215	225700
Yongshou County	2021	Xianyang City	20573	3.52604	423409	69	15293	27	30416	16.8591	945940	11914	252040
Changwu County	2012	Xianyang City	11058	5.66694	208938	58	7477	12	32460	47.1677	446200	6622	126011
Changwu County	2013	Xianyang City	11223	5.25002	233416	143	7405	13	34186	50.4326	525800	7556	136649
Changwu County	2014	Xianyang City	11666	4.72956	292219	228	7333	14	31389	43.5827	606100	8508	147306
Changwu County	2015	Xianyang City	11708	5.01076	307462	247	7415	15	32570	38.969	688300	7987	152760
Changwu County	2016	Xianyang City	11775	4.65333	319740	248	7320	14	33266	40.7989	730000	8702	158683
Changwu County	2017	Xianyang City	11831	4.75581	353680	265	7510	13	33494	37.0267	959200	9417	166383
Changwu County	2018	Xianyang City	11909	4.67453	308384	273	7700	12	34064	33.6065	1004600	10132	162800
Changwu County	2019	Xianyang City	12021	4.51551	343442	87	7890	17	33707	30.1863	1022450	10847	176090
Changwu County	2020	Xianyang City	12133	4.3565	378500	133	8080	22	33350	26.7661	991500	11562	186800
Changwu County	2021	Xianyang City	12245	4.19748	413558	100	8270	27	32993	23.3459	1183200	12277	201700
Xunyi County	2012	Xianyang City	27766	4.5644	386944	80	16135	10	33448	29.2654	868400	6662	232570
Xunyi County	2013	Xianyang City	27767	4.28289	434653	72	15334	11	28267	33.4341	1022800	7701	244209
Xunyi County	2014	Xianyang City	27678	3.90303	486744	64	14533	12	33440	27.4712	1160200	8741	268200
Xunyi County	2015	Xianyang City	27752	4.05459	512243	64	14480	14	33720	24.3391	1049230	8208	270580
Xunyi County	2016	Xianyang City	27816	3.9547	526502	66	14480	10	32085	21.7686	1066300	8951	292882
Xunyi County	2017	Xianyang City	27786	3.80483	542244	69	14532	10	30430	18.5977	1220200	9694	293471
Xunyi County	2018	Xianyang City	27786	3.79036	480119	206	14584	10	30012	20.164	965846	10437	264731
Xunyi County	2019	Xianyang City	27786	4.46239	502679	13	14636	13	28775	21.7304	883870	11180	285120
Xunyi County	2020	Xianyang City	27786	5.13442	525239	42	14688	16	27538	23.2967	892100	11923	311580
Xunyi County	2021	Xianyang City	27786	5.80645	547799	40	14740	19	26301	24.863	1059300	12666	343890
Chunhua County	2012	Xianyang City	25432	4.88731	376957	264	17416	19	32721	44.9233	426700	6572	217400
Chunhua County	2013	Xianyang City	26034	4.4382	417469	268	17516	23	28316	46.4439	502500	7518	213877
Chunhua County	2014	Xianyang City	27330	4.02488	456662	272	17616	24	30758	43.9035	535400	8451	229224
Chunhua County	2015	Xianyang City	28754	4.10527	460098	275	17968	25	30680	37.1608	573800	7929	231687
Chunhua County	2016	Xianyang City	28756	4.02382	480087	280	17720	15	28780	34.1713	649100	8639	250230
Chunhua County	2017	Xianyang City	28762	3.94534	506629	145	17333	15	24862	29.3256	747800	9349	261616
Chunhua County	2018	Xianyang City	28670	3.92794	454796	534	16946	16	22511	27.8355	760800	10059	250100
Chunhua County	2019	Xianyang City	28698	3.7957	487215	409	16559	11	21422	26.3454	775200	10769	265400
Chunhua County	2020	Xianyang City	28726	3.66346	519634	439	16172	6	20333	24.8553	820170	11479	314810
Chunhua County	2021	Xianyang City	28754	3.53122	552053	620	15785	1	19244	23.3652	907400	12189	342300
Wugong County	2012	Xianyang City	26528	7.93735	293249	454	37095	24	29694	78.7619	741400	8167	185150
Wugong County	2013	Xianyang City	26767	7.47189	323023	446	38180	30	28548	75.5878	959400	9335	187882
Wugong County	2014	Xianyang City	26906	7.33004	348078	438	39265	32	26703	68.6233	1100400	10521	202671
Wugong County	2015	Xianyang City	26937	7.54145	362655	436	39607	34	26663	62.3925	1124500	9857	209891
Wugong County	2016	Xianyang City	26955	7.34569	385201	437	39935	26	26647	65.4754	1232500	10660	223719
Wugong County	2017	Xianyang City	26967	7.20106	407256	438	39952	27	26629	68.4718	1409000	11463	235259
Wugong County	2018	Xianyang City	26978	7.22051	361151	653	39969	28	26615	59.5723	1412380	12266	214100
Wugong County	2019	Xianyang City	27590	7.17104	391253	268	39986	16	26625	50.6728	1531550	13069	232470
Wugong County	2020	Xianyang City	28202	7.12157	421355	310	40003	4	26635	41.7733	1545850	13872	256230
Wugong County	2021	Xianyang City	28814	7.07209	451457	585	40020	-8	26645	32.8738	1713500	14675	275470
Xingping City	2012	Xianyang City	35810	6.22611	325470	1914	37358	28	16768	80.5252	1452000	8437	209999
Xingping City	2013	Xianyang City	34875	6.36568	362534	1889	37670	31	16923	78.5811	1752200	9677	227404
Xingping City	2014	Xianyang City	33924	6.3965	384997	1864	37982	32	16927	71.4563	1827700	10936	243411
Xingping City	2015	Xianyang City	32687	6.85321	388869	2106	37982	33	16927	63.2793	1916993	10232	249283
Xingping City	2016	Xianyang City	31490	6.9275	415054	2118	38014	23	16874	70.8962	2176700	11067	260376
Xingping City	2017	Xianyang City	28145	6.91672	394385	2119	35176	23	15058	72.8757	2411100	11902	249261
Xingping City	2018	Xianyang City	28031	6.65934	326852	1968	32338	20	14156	61.1847	2483302	12737	216675
Xingping City	2019	Xianyang City	27957	6.77583	364691	1763	29500	30	15503	49.4938	2416440	13572	235461
Xingping City	2020	Xianyang City	27883	6.89233	402530	1883	26662	40	16850	37.8028	2421100	14407	263010
Xingping City	2021	Xianyang City	27809	7.00882	440369	2027	23824	50	18197	26.1119	2809539	15242	342639
Binzhou City	2012	Xianyang City	30551	4.25462	252341	168	16383	10	28474	44.7025	1361800	7835	144544
Binzhou City	2013	Xianyang City	31169	3.79499	277029	175	17974	11	22427	49.3978	1654300	9058	156689
Binzhou City	2014	Xianyang City	31283	3.6867	297830	182	19565	13	20626	42.6741	1860900	10271	168073
Binzhou City	2015	Xianyang City	31430	3.99688	307949	198	19585	14	21516	37.1495	1700100	9640	172374
Binzhou City	2016	Xianyang City	31583	3.89605	318129	199	19626	14	21564	38.8732	1888200	10453	178821
Binzhou City	2017	Xianyang City	31755	3.82485	338547	207	19846	15	20010	34.1159	2136200	11266	190428
Binzhou City	2018	Xianyang City	31930	3.65615	326564	208	20066	16	19286	32.0215	2171140	12079	185600
Binzhou City	2019	Xianyang City	32049	3.48785	354735	215	20286	21	19372	29.9271	2311030	12892	200990
Binzhou City	2020	Xianyang City	32168	3.31954	382906	220	20506	26	19458	27.8326	2161430	13705	217780
Binzhou City	2021	Xianyang City	32287	3.15123	411077	220	20726	31	19544	25.7382	2701583	14518	232324
Linwei District	2012	Weinan City	69495	5.28875	527055			76	58223	75.8198	2625200	6887
Linwei District	2013	Weinan City	69522	4.85715	590453			75	58292	73.1832	2737400	7870
Linwei District	2014	Weinan City	65963	5.04956	630349			81	67203	65.1616	3037900	8940
Linwei District	2015	Weinan City	65683	5.3206	653461			95	69224	55.9551	3068100	9045
Linwei District	2016	Weinan City	63547	5.38238	687069			88	66943	62.0955	3326700	9805
Linwei District	2017	Weinan City	61591	5.55781	704352			101	67834	59.728	3705200	10565
Linwei District	2018	Weinan City	59444	6.12319	846456			114	68075	52.3078	4196400	11325
Linwei District	2019	Weinan City	52668	5.64747	850412			91	61961	44.8875	4276100	12085
Linwei District	2020	Weinan City	45892	5.17175	854368			68	70622	37.4673	4418900	12845
Linwei District	2021	Weinan City	39116	4.69603	858324			45	79283	30.047	4561700	13605
Huazhou District	2012	Weinan City	23958	4.99048	138149	2757	14200	27	26827	44.6467	1106900	6505	79438
Huazhou District	2013	Weinan City	23922	4.69442	155283	2783	21800	30	26879	41.1313	1144300	7487	87358
Huazhou District	2014	Weinan City	23922	4.60254	166851	2809	29400	33	26931	37.4618	1157500	8438	93970
Huazhou District	2015	Weinan City	23952	4.91145	171806	2809	29400	35	26983	34.6533	1080300	8430	96415
Huazhou District	2016	Weinan City	23746	4.82502	179231	2802	29400	33	27035	32.1911	882200	9088	100535
Huazhou District	2017	Weinan City	23632	4.82431	184469	2824	27333	30	27001	30.5686	949800	9746	103510
Huazhou District	2018	Weinan City	23590	5.79483	227018	2826	25266	31	26968	27.8695	756097	10404	134720
Huazhou District	2019	Weinan City	23608	5.91901	251489	2843	23199	31	26965	25.1704	993373	11062	148893
Huazhou District	2020	Weinan City	23626	6.04319	275960	2844	21132	31	26939	22.4713	965843	11720	171130
Huazhou District	2021	Weinan City	23644	6.16737	300431	2844	19065	31	26913	19.7722	1119800	12378	181100
Tongguan County	2012	Weinan City	10654	4.36277	52526	137	3326	9	10715	60.0265	328000	6388	29940
Tongguan County	2013	Weinan City	10720	4.02052	60204	171	5943	10	11839	59.1874	387500	7391	34270
Tongguan County	2014	Weinan City	10661	3.84664	64299	205	8560	10	11506	52.2246	411000	8381	34240
Tongguan County	2015	Weinan City	10593	4.28009	66261	194	8208	11	11621	44.8386	365500	8368	35190
Tongguan County	2016	Weinan City	10660	4.13124	69086	216	14600	10	11619	42.7405	369000	9063	36572
Tongguan County	2017	Weinan City	10703	4.11623	71616	214	13333	13	10601	41.3614	457700	9758	37916
Tongguan County	2018	Weinan City	10720	4.1347	87342	110	12066	13	9632	37.2149	403487	10453	48440
Tongguan County	2019	Weinan City	10710	3.95546	96342	45	10799	8	9374	33.0685	441972	11148	53986
Tongguan County	2020	Weinan City	10700	3.77622	105342	45	9532	3	9116	28.922	440851	11843	63172
Tongguan County	2021	Weinan City	10690	3.59698	114342	49	8265	-2	8858	24.7756	473732	12538	68392
Dali County	2012	Weinan City	76399	3.79784	483972	197960	35970	89	71094	81.4532	1005800	7051	266338
Dali County	2013	Weinan City	75705	3.67347	543715	101840	58160	101	74135	77.8019	1098400	8070	287831
Dali County	2014	Weinan City	74380	3.6372	584115	5720	80350	103	82593	69.5218	1123700	9184	311324
Dali County	2015	Weinan City	74031	3.82433	597803	5820	80350	110	87380	57.6022	1047300	9306	319635
Dali County	2016	Weinan City	70692	3.89785	630040	5930	85470	103	92142	62.356	1159500	10106	337452
Dali County	2017	Weinan City	67571	4.12439	648934	17781	85463	114	86202	61.8165	1620400	10906	623800
Dali County	2018	Weinan City	66876	4.43788	772302	21762	85456	120	83273	54.65	1505775	11706	428663
Dali County	2019	Weinan City	64259	4.77458	859041	24077	85449	116	80019	47.4836	1685611	12506	476872
Dali County	2020	Weinan City	61642	5.11128	945780	24600	85442	112	77814	40.3171	1755100	13306	557100
Dali County	2021	Weinan City	59025	5.44798	1032519	25595	85435	108	75609	33.1507	1924624	14106	596518
Heyang County	2012	Weinan City	58383	3.7713	274949	1473	35668	27	26725	65.839	601000	5912	151269
Heyang County	2013	Weinan City	58628	3.53074	310376	1475	35667	30	25148	65.3645	678500	6785	160687
Heyang County	2014	Weinan City	58395	3.37995	332370	1477	35666	31	24909	57.5196	713900	7620	174894
Heyang County	2015	Weinan City	58535	3.5236	344712	1690	43333	32	24797	51.0702	753100	7646	181981
Heyang County	2016	Weinan City	58324	3.48212	363275	2103	43340	32	24764	47.4926	784700	8311	191796
Heyang County	2017	Weinan City	58406	3.49344	374359	2197	46200	30	24695	45.2316	924500	8976	197510
Heyang County	2018	Weinan City	58580	3.75084	456674	2201	49060	33	24663	40.7782	971800	9641	255200
Heyang County	2019	Weinan City	58402	3.93463	509299	688	51920	34	24551	36.3248	1049762	10306	285133
Heyang County	2020	Weinan City	58224	4.11841	561924	820	54780	35	24464	31.8714	1129682	10971	337663
Heyang County	2021	Weinan City	58046	4.3022	614549	697	57640	36	24377	27.418	1239066	11636	354921
Chengcheng County	2012	Weinan City	45504	3.90416	311150	93	34033	29	31851	62.7682	770700	5938	175310
Chengcheng County	2013	Weinan City	46307	3.78129	343357	118	35466	32	33001	64.0785	830100	6800	188677
Chengcheng County	2014	Weinan City	46925	3.56535	368722	143	36899	35	33529	54.7447	852900	7691	196430
Chengcheng County	2015	Weinan City	46655	3.82726	380550	200	36899	37	35445	48.8891	822600	7687	202072
Chengcheng County	2016	Weinan City	46884	3.74441	402459	251	42535	40	35307	45.6555	790400	8302	212954
Chengcheng County	2017	Weinan City	47193	3.65474	412496	325	49336	35	35731	43.043	856900	8917	217238
Chengcheng County	2018	Weinan City	48127	3.76811	508307	570	56137	38	24863	39.865	878458	9532	272915
Chengcheng County	2019	Weinan City	47998	3.51513	564600	652	62938	101	23749	36.6871	984934	10147	304252
Chengcheng County	2020	Weinan City	47869	3.26214	620893	716	69739	164	23705	33.5091	1035419	10762	360636
Chengcheng County	2021	Weinan City	47740	3.00915	677186	909	76540	227	23661	30.3312	1137248	11377	386808
Pucheng County	2012	Weinan City	97855	3.68153	363911	9070	77465	63	62180	73.8346	1300100	6603	213420
Pucheng County	2013	Weinan City	94933	3.47716	411106	10076	77570	66	62545	71.7322	1418700	7615	222161
Pucheng County	2014	Weinan City	93352	3.48506	440782	11082	77675	94	67727	64.9527	1516200	8590	236160
Pucheng County	2015	Weinan City	91033	3.86853	455728	11887	77700	96	66763	55.1932	1551600	8557	243668
Pucheng County	2016	Weinan City	88093	3.88443	479333	12548	77700	94	66327	56.7033	1631300	9250	254570
Pucheng County	2017	Weinan City	88571	3.89952	493902	11572	77712	100	65320	55.0186	1815300	9943	266933
Pucheng County	2018	Weinan City	88906	4.24998	590033	11900	77724	102	65484	50.7137	1906335	10636	333298
Pucheng County	2019	Weinan City	88717	4.23555	638098	12951	77736	37	60259	46.4087	1941567	11329	360473
Pucheng County	2020	Weinan City	88528	4.22111	686163	14002	77748	-28	59838	42.1038	2035357	12022	418196
Pucheng County	2021	Weinan City	88339	4.20667	734228	14183	77760	-93	59417	37.7988	2259974	12715	462261
Baishui County	2012	Weinan City	28577	4.125	313727	385	22900	35	47824	54.9245	555000	6242	181008
Baishui County	2013	Weinan City	28704	3.85866	359886	381	25000	38	51325	59.1954	612100	7215	202692
Baishui County	2014	Weinan City	28718	3.66349	398236	377	27100	40	53742	49.1299	663000	8218	227910
Baishui County	2015	Weinan City	28735	3.88457	414710	400	29333	41	58166	44.7358	615400	8314	237235
Baishui County	2016	Weinan City	26165	4.16855	437159	407	28533	40	61610	42.0552	629700	9046	249748
Baishui County	2017	Weinan City	26387	4.13097	450236	407	29700	32	64105	39.4239	722300	9778	256897
Baishui County	2018	Weinan City	26112	3.92915	538547	466	30867	33	68699	35.7173	774973	10510	325466
Baishui County	2019	Weinan City	25985	3.93227	580266	430	32034	31	70849	32.0107	845257	11242	346957
Baishui County	2020	Weinan City	25858	3.93539	621985	430	33201	29	69779	28.3041	841442	11974	385987
Baishui County	2021	Weinan City	25731	3.9385	663704	412	34368	27	68709	24.5975	936832	12706	417145
Fuping County	2012	Weinan City	70987	5.35383	397056	-1548	60334	53	224494	69.106	1001000	6551	230181
Fuping County	2013	Weinan City	71002	5.07036	445089	414	70667	58	234753	69.9168	1201200	7514	246525
Fuping County	2014	Weinan City	70814	5.01319	477479	2376	81000	61	264735	63.4942	1355100	8476	263250
Fuping County	2015	Weinan City	70171	5.28218	494383	2313	90000	73	282832	53.9269	1303500	8515	271000
Fuping County	2016	Weinan City	68101	5.28923	520442	2516	78312	61	300944	56.4493	1373000	9171	284427
Fuping County	2017	Weinan City	66601	5.41079	532776	5126	82000	62	301907	53.9935	1444800	9827	290307
Fuping County	2018	Weinan City	66597	5.67423	668497	570	85688	66	302084	48.1758	1659967	10483	382145
Fuping County	2019	Weinan City	66330	5.73353	741886	5420	89376	78	57454	42.3581	1839644	11139	422153
Fuping County	2020	Weinan City	66063	5.79282	815275	5127	93064	90	57440	36.5404	1930770	11795	480318
Fuping County	2021	Weinan City	65796	5.85212	888664	4615	96752	102	57426	30.7226	2146643	12451	511654
Hancheng City	2012	Weinan City	26882	3.09754	231794	1100	14273	28	17474	55.3695	2332200	8852	129383
Hancheng City	2013	Weinan City	27240	2.84875	258311	1200	14273	28	17547	54.8831	2820600	10179	132352
Hancheng City	2014	Weinan City	25305	2.87651	276872	1300	14273	30	17612	49.5008	3030100	11400	138177
Hancheng City	2015	Weinan City	23370	3.10552	287983	1260	23400	31	17642	46.0969	3112900	11429	143256
Hancheng City	2016	Weinan City	24709	2.78121	305760	1312	23400	28	18124	40.7325	3203800	12400	151869
Hancheng City	2017	Weinan City	24573	2.64868	315781	1365	23200	26	18068	40.1728	3490000	13371	156245
Hancheng City	2018	Weinan City	24408	1.98865	420899	1352	23000	25	18488	37.8368	3689941	14342	224921
Hancheng City	2019	Weinan City	24089	2.0445	456675	611	22800	24	18010	35.5008	3518557	15313	245308
Hancheng City	2020	Weinan City	23770	2.10035	492451	602	22600	23	18014	33.1648	3384402	16284	270664
Hancheng City	2021	Weinan City	23451	2.1562	528227	602	22400	22	18018	30.8287	3745198	17255	274143
Huayin City	2012	Weinan City	12758	6.3082	85727	187	14637	6	5380	57.6739	676300	6402	50360
Huayin City	2013	Weinan City	12727	6.13656	97577	186	14582	6	5376	54.4741	740600	7325	52542
Huayin City	2014	Weinan City	12703	5.90412	104549	185	14527	7	7588	49.632	783500	8241	56300
Huayin City	2015	Weinan City	12580	6.53227	107973	173	13133	7	7668	43.1476	804200	8236	56300
Huayin City	2016	Weinan City	12557	6.25301	113091	192	13100	7	7698	44.1031	700200	8862	60484
Huayin City	2017	Weinan City	12567	6.3662	116610	200	13134	8	7699	42.313	849600	9488	62375
Huayin City	2018	Weinan City	12569	8.74079	150071	1579	13168	9	7698	37.082	911614	10114	85258
Huayin City	2019	Weinan City	12567	8.62091	164867	1532	13202	9	7696	31.851	707898	10740	92518
Huayin City	2020	Weinan City	12565	8.50103	179663	1532	13236	9	7756	26.6201	724847	11366	104781
Huayin City	2021	Weinan City	12563	8.38115	194459	409	13270	9	7816	21.3891	776000	11992	114600
Baota District	2012	Yan’an City	32450	2.7796	184619			15	7291	31.0259	2033100	7483
Baota District	2013	Yan’an City	32382	2.62563	198094			16	7275	34.6959	2165700	8493
Baota District	2014	Yan’an City	32431	2.77256	214744			17	7424	25.3561	2433900	9529
Baota District	2015	Yan’an City	32360	2.74774	202553			18	7447	25.9721	2694000	9090
Baota District	2016	Yan’an City	31201	2.88488	214136			8	7373	21.5619	2551300	9835
Baota District	2017	Yan’an City	31685	2.93069	221711			8	7272	20.8428	2912300	10580
Baota District	2018	Yan’an City	31435	2.30081	277751			8	7140	22.3606	3289500	11325
Baota District	2019	Yan’an City	31563	2.33226	296634			9	6810	23.8783	3639100	12070
Baota District	2020	Yan’an City	31691	2.3637	315517			10	6480	25.396	3685400	12815
Baota District	2021	Yan’an City	31819	2.39515	334400			11	6150	26.9137	3731700	13560
Ansai District	2012	Yan’an City	27200	2.52088	113293	2248	1600	7	4361	27.5866	1057500	8046	64749
Ansai District	2013	Yan’an City	27200	2.41496	125010	2375	2700	9	4531	28.8396	1043200	9148	69594
Ansai District	2014	Yan’an City	27200	2.62831	131228	2502	3800	11	4701	21.1084	1064400	10374	73190
Ansai District	2015	Yan’an City	27260	2.55029	131628	3606	3818	11	4871	21.989	971000	10437	73074
Ansai District	2016	Yan’an City	27260	2.50341	147381	3821	4210	9	5041	19.8203	766700	11271	80729
Ansai District	2017	Yan’an City	37243	1.84045	158052	3919	4328	9	5211	18.9322	913000	12105	82624
Ansai District	2018	Yan’an City	39642	1.34416	220660	1965	4446	10	5193	19.2944	1072200	12939	117800
Ansai District	2019	Yan’an City	39622	1.3624	232223	3990	4564	10	5091	19.6566	1146310	13773	124170
Ansai District	2020	Yan’an City	39602	1.38064	243786	3940	4682	10	4989	20.0188	1112604	14607	172952
Ansai District	2021	Yan’an City	39582	1.39889	255349	4080	4800	10	4887	20.3811	1457189	15441	195615
Yanchang County	2012	Yan’an City	16510	2.32429	128152	977	131	9	4688	39.8058	340900	6282	73084
Yanchang County	2013	Yan’an City	16530	2.15354	141856	1017	133	9	4921	45.496	376700	7124	80190
Yanchang County	2014	Yan’an City	16570	2.41865	153645	1057	135	11	5166	33.82	410900	8007	86980
Yanchang County	2015	Yan’an City	16570	1.67966	152321	1106	135	11	5362	33.9016	430000	8671	87863
Yanchang County	2016	Yan’an City	14867	1.81926	147698	1257	135	10	5495	29.0388	378200	9286	87950
Yanchang County	2017	Yan’an City	14715	2.04057	150874	674	140	10	5739	28.6174	459900	9901	89259
Yanchang County	2018	Yan’an City	14648	1.47481	179965	715	145	13	6025	28.7553	540779	10516	108137
Yanchang County	2019	Yan’an City	14635	1.58463	185484	1193	150	11	6416	28.8932	528700	11131	109880
Yanchang County	2020	Yan’an City	14622	1.69444	191003	1202	155	9	6807	29.0311	540600	11746	151100
Yanchang County	2021	Yan’an City	14609	1.80426	196522	1368	160	7	7198	29.1689	684939	12361	172727
Yanchuan County	2012	Yan’an City	24838	1.74181	83862	366	350	7	4060	37.7957	823800	5815	47951
Yanchuan County	2013	Yan’an City	24805	1.61476	97488	367	350	7	4060	41.3078	945600	6530	53480
Yanchuan County	2014	Yan’an City	24805	1.73425	109300	368	350	11	4060	29.7224	1001700	7634	59426
Yanchuan County	2015	Yan’an City	24138	1.11016	118827	435	350	12	4060	30.9099	704400	8354	67342
Yanchuan County	2016	Yan’an City	23684	1.34129	133672	567	350	12	4058	26.1449	681100	9063	75529
Yanchuan County	2017	Yan’an City	22818	1.39276	136680	444	350	13	4048	26.7245	806500	9772	77324
Yanchuan County	2018	Yan’an City	23524	1.22921	163918	793	350	11	3820	27.1322	1143557	10481	95303
Yanchuan County	2019	Yan’an City	23473	1.29336	169243	1142	350	13	5365	27.5399	994370	11190	98130
Yanchuan County	2020	Yan’an City	23422	1.3575	174568	1163	350	15	6910	27.9475	1017800	11899	119400
Yanchuan County	2021	Yan’an City	23371	1.42165	179893	1312	350	17	8455	28.3552	1189725	12608	127040
Zichang City	2012	Yan’an City	30370	2.54392	114146	784	204	12	7526	26.4171	745600	7357	66050
Zichang City	2013	Yan’an City	30834	2.43319	125566	806	242	12	7666	27.8753	831300	8357	70372
Zichang City	2014	Yan’an City	31263	2.48399	128972	828	280	15	8247	19.2369	811200	9335	72000
Zichang City	2015	Yan’an City	31521	1.01037	115647	837	2200	15	8379	21.6268	722200	9021	63529
Zichang City	2016	Yan’an City	31567	2.40077	128305	840	2266	10	8333	16.7197	749700	9752	69943
Zichang City	2017	Yan’an City	31651	2.46924	128829	781	3100	11	3855	16.539	971900	10483	71440
Zichang City	2018	Yan’an City	32518	1.3062	124316	807	3934	9	3781	18.5856	1145757	11214	71598
Zichang City	2019	Yan’an City	32674	1.3182	127166	1010	4768	12	3707	20.6322	1110650	11945	73000
Zichang City	2020	Yan’an City	32830	1.33021	130016	1034	5602	15	3633	22.6788	1000141	12676	77659
Zichang City	2021	Yan’an City	32986	1.34221	132866	1044	6436	18	3559	24.7254	1356686	13407	93761
Zhidan County	2012	Yan’an City	21200	2.60123	72235	1107	-940	13	2655	26.9612	1759800	7872	44490
Zhidan County	2013	Yan’an City	21197	2.42747	80143	1110	30	14	2658	28.1443	1678900	8872	47141
Zhidan County	2014	Yan’an City	24417	2.17799	85421	1113	1000	15	2658	21.7143	1666200	10001	50192
Zhidan County	2015	Yan’an City	27547	1.96116	93086	1142	1500	15	2669	21.1077	1341400	9971	50310
Zhidan County	2016	Yan’an City	30187	1.87127	101813	1142	1430	9	2812	20.9495	1075900	10688	51383
Zhidan County	2017	Yan’an City	30225	1.87173	101002	1161	1466	9	2801	17.7834	1329900	11405	55935
Zhidan County	2018	Yan’an City	31381	2.25015	139237	1134.5	1502	9	3159	18.8455	1499800	12122	76400
Zhidan County	2019	Yan’an City	31394	2.28028	139964	1108	1538	9	4037	19.9075	1615520	12839	77630
Zhidan County	2020	Yan’an City	31407	2.3104	140691	1174	1574	9	4915	20.9696	1416695	13556	97567
Zhidan County	2021	Yan’an City	31420	2.34053	141418	1175	1610	9	5793	22.0316	1964136	14273	113178
Wuqi County	2012	Yan’an City	24520	2.39241	70880	376	-143	16	3631	27.2235	2010700	8005	42944
Wuqi County	2013	Yan’an City	24881	2.28054	79048	498	1540	18	3450	27.8611	2097000	9110	46386
Wuqi County	2014	Yan’an City	25066	2.47929	83532	620	3223	18	3314	22.2885	2115100	10358	49401
Wuqi County	2015	Yan’an City	25327	2.41106	87264	665	4332	19	3322	22.0308	1404700	10302	48871
Wuqi County	2016	Yan’an City	25320	2.46122	84473	481	6550	13	2824	21.8052	1086500	11064	47118
Wuqi County	2017	Yan’an City	25652	2.70466	86403	570	5870	14	2819	17.9865	1353400	11826	48823
Wuqi County	2018	Yan’an City	26340	2.61697	107332	44	5190	14	2807	18.234	1506676	12588	64060
Wuqi County	2019	Yan’an City	26610	2.65351	111937	504	4510	15	3359	18.4816	1787260	13350	67960
Wuqi County	2020	Yan’an City	26880	2.69006	116542	504	3830	16	3911	18.7291	1501324	14112	72957
Wuqi County	2021	Yan’an City	27150	2.7266	121147	199	3150	17	4463	18.9767	2104872	14874	78392
Ganquan County	2012	Yan’an City	9586	4.33726	64988	684	67	8	3492	32.2212	205000	7689	36319
Ganquan County	2013	Yan’an City	9558	4.14281	73320	686	100	8	3415	34.9286	213000	8642	39815
Ganquan County	2014	Yan’an City	6110	6.94386	78243	688	133	9	3333	26.6377	224400	9662	42190
Ganquan County	2015	Yan’an City	6006	7.24093	79187	932	5000	9	3694	26.3492	216200	9778	42100
Ganquan County	2016	Yan’an City	6023	8.29703	81123	1014	2250	7	3721	25.135	205800	10462	44158
Ganquan County	2017	Yan’an City	6013	7.84633	83317	1304	2250	7	3734	22.9127	234000	11146	46178
Ganquan County	2018	Yan’an City	6012	7.42299	87686	1318	2250	7	3756	23.2236	266538	11830	49559
Ganquan County	2019	Yan’an City	6005	7.53872	91039	1331	2250	8	3896	23.5345	290770	12514	51560
Ganquan County	2020	Yan’an City	5998	7.65445	94392	1371	2250	9	4036	23.8454	288399	13198	54659
Ganquan County	2021	Yan’an City	5991	7.77018	97745	1418	2250	10	4176	24.1564	330692	13882	56909
Fu County	2012	Yan’an City	9847	3.78836	185474	593	10677	15	11138	35.4589	301200	8084	103689
Fu County	2013	Yan’an City	9864	3.58769	208475	624	6110	16	11223	38.8887	324900	9086	114209
Fu County	2014	Yan’an City	9864	3.54927	227397	655	1543	18	11897	30.8785	389500	10313	124682
Fu County	2015	Yan’an City	9895	3.68125	217842	658	1543	18	11931	29.1479	409500	10282	122120
Fu County	2016	Yan’an City	9999	3.64296	241647	573	4400	11	11812	28.1141	447100	11134	133900
Fu County	2017	Yan’an City	10054	3.64124	249351	559	4880	11	11140	26.2654	529100	11986	138616
Fu County	2018	Yan’an City	10054	3.2773	283096	559	5360	12	10899	26.0558	626780	12838	160945
Fu County	2019	Yan’an City	10054	3.31112	296493	537	5840	12	11362	25.8461	663700	13690	167740
Fu County	2020	Yan’an City	10054	3.34494	309890	567	6320	12	11825	25.6364	723705	14542	220930
Fu County	2021	Yan’an City	10054	3.37875	323287	567	6800	12	12288	25.4267	831275	15394	233382
Luochuan County	2012	Yan’an City	11237	8.40198	342897	-91	4650	25	53527	40.2794	2130400	9278	191341
Luochuan County	2013	Yan’an City	10657	8.87116	375878	-78	4520	28	56489	45.4614	2473400	10410	206706
Luochuan County	2014	Yan’an City	10471	9.48162	400197	-65	4390	30	61468	36.7687	2294400	11742	220480
Luochuan County	2015	Yan’an City	10286	9.71087	360148	-52	4910	32	58261	33.5819	1854800	10785	194014
Luochuan County	2016	Yan’an City	10138	10.4532	386336	-39	5260	25	61298	31.9579	1517300	11713	211379
Luochuan County	2017	Yan’an City	9885	10.6335	387282	-26	6710	26	59923	29.6832	1497800	12641	213094
Luochuan County	2018	Yan’an City	10195	10.4094	330942	-13	8160	26	58353	29.0615	2439861	13569	184612
Luochuan County	2019	Yan’an City	10274	10.3488	432143	0	9610	26	52518	28.4397	2438730	14497	241240
Luochuan County	2020	Yan’an City	10353	10.2883	533344	13	11060	26	46683	27.818	2416417	15425	339357
Luochuan County	2021	Yan’an City	10432	10.2277	634545	26	12510	26	40848	27.1963	2790488	16353	365568
Yichuan County	2012	Yan’an City	11854	3.12831	162137	282	2206	24	9524	36.6468	185800	7565	93491
Yichuan County	2013	Yan’an City	11807	3.10104	181592	287	1813	26	14991	40.5796	207800	8496	102584
Yichuan County	2014	Yan’an City	14851	2.50724	196008	292	1420	27	17917	33.7556	227200	9626	110820
Yichuan County	2015	Yan’an City	14669	2.47611	197875	298	1420	28	18618	32.0302	253200	9644	111651
Yichuan County	2016	Yan’an City	14683	2.38691	202531	250	1420	17	18947	27.5236	279200	10376	117322
Yichuan County	2017	Yan’an City	14923	2.35991	203724	298	2860	18	19208	26.7491	303200	11108	117966
Yichuan County	2018	Yan’an City	14923	1.82611	251732	330.5	4300	18	18244	27.1397	362603	11840	149428
Yichuan County	2019	Yan’an City	14917	1.82892	255004	363	5740	18	19372	27.5302	377830	12572	152030
Yichuan County	2020	Yan’an City	14911	1.83173	258276	367	7180	18	20500	27.9208	424045	13304	190669
Yichuan County	2021	Yan’an City	14905	1.83455	261548	366	8620	18	21628	28.3114	455735	14036	203322
Huanglong County	2012	Yan’an City	11865	6.52128	63990	-2	6106	5	10226	22.9713	88600	6766	37205
Huanglong County	2013	Yan’an City	11891	6.90615	69163	1	6003	7	10059	24.646	101600	7585	39206
Huanglong County	2014	Yan’an City	12050	7.14929	80656	4	5900	8	10562	20.3731	111100	8503	45615
Huanglong County	2015	Yan’an City	11950	8.02661	82839	4	7100	8	10716	18.9954	132700	8958	48076
Huanglong County	2016	Yan’an City	11756	7.70432	85086	5	7800	7	10629	12.2685	139600	9710	48816
Huanglong County	2017	Yan’an City	11611	6.02015	87846	5	6930	7	11222	12.0132	154200	10462	50168
Huanglong County	2018	Yan’an City	11460	6.38674	78888	61	6060	8	10943	13.5243	170300	11214	45712
Huanglong County	2019	Yan’an City	11028	6.6644	100434	14	5190	8	10861	15.0354	186690	11966	57760
Huanglong County	2020	Yan’an City	10596	6.94206	121980	16	4320	8	10779	16.5465	195301	12718	62877
Huanglong County	2021	Yan’an City	10164	7.21973	143526	15	3450	8	10697	18.0576	225344	13470	78267
Huangling County	2012	Yan’an City	8938	5.21548	110239	109	303	24	9085	35.8338	1034000	8974	62257
Huangling County	2013	Yan’an City	8945	5.10207	122464	131	456	26	10805	39.8268	1085300	10096	68318
Huangling County	2014	Yan’an City	9774	4.90475	142682	153	609	27	11223	31.7996	1113600	11267	79823
Huangling County	2015	Yan’an City	9619	5.1994	137067	113	652	27	11530	28.7548	862000	10581	77034
Huangling County	2016	Yan’an City	9241	5.3518	143451	139	749	17	11396	27.4425	958400	11405	79654
Huangling County	2017	Yan’an City	8971	5.09999	145868	95	607	17	11537	26.5485	1198200	12229	79954
Huangling County	2018	Yan’an City	9262	5.75351	165652	2115	465	18	11864	25.9521	1524078	13053	92795
Huangling County	2019	Yan’an City	9128	5.86985	172932	305	323	18	12005	25.3557	1859250	13877	97500
Huangling County	2020	Yan’an City	8994	5.98619	180212	290	181	18	12146	24.7593	1690104	14701	134169
Huangling County	2021	Yan’an City	8860	6.10254	187492	346	39	18	12287	24.1629	2489907	15525	147694
Hantai District	2012	Hanzhong City	14923	6.93674	248738			12	6630	57.186	1562900	6190
Hantai District	2013	Hanzhong City	14815	7.07695	276641			14	6694	56.276	1771400	6896
Hantai District	2014	Hanzhong City	14773	7.03215	294765			15	8948	48.2951	2038900	7602
Hantai District	2015	Hanzhong City	14618	7.35956	306742			17	8878	40.3409	2302500	8308
Hantai District	2016	Hanzhong City	14064	7.6752	330189			17	12757	42.2764	2522700	9014
Hantai District	2017	Hanzhong City	13787	7.9839	336786			18	12356	41.1143	2874000	9720
Hantai District	2018	Hanzhong City	13740	8.24381	261343			18	11775	36.734	3225400	10426
Hantai District	2019	Hanzhong City	13490	8.45137	287841			19	12053	32.3536	3760600	11132
Hantai District	2020	Hanzhong City	13240	8.65893	314339			20	12331	27.9732	3758000	11838
Hantai District	2021	Hanzhong City	12990	8.86649	340837			21	12609	23.5928	3755400	12544
Nanzheng District	2012	Hanzhong City	30224	4.87745	330886	488	16220	18	22951	35.9594	1149000	7228	185892
Nanzheng District	2013	Hanzhong City	30164	4.95011	367411	479	16250	20	21659	35.3707	1344600	8305	196267
Nanzheng District	2014	Hanzhong City	30446	4.8613	392411	470	16280	22	20367	30.8689	1540400	9368	212543
Nanzheng District	2015	Hanzhong City	29194	5.07478	412008	487	23300	22	19075	24.3186	1648800	8217	222999
Nanzheng District	2016	Hanzhong City	29198	5.0959	443339	497	23900	21	17783	25.0882	1740700	8910	240563
Nanzheng District	2017	Hanzhong City	34351	4.30346	449362	270	25067	23	16491	23.2218	1924300	9603	244164
Nanzheng District	2018	Hanzhong City	34783	4.4993	533661	64	26234	23	15199	21.6566	2168570	10296	300809
Nanzheng District	2019	Hanzhong City	36179	4.30178	590131	70	27401	23	15077	20.0914	2184111	10989	333484
Nanzheng District	2020	Hanzhong City	37575	4.10426	646601	241	28568	23	14955	18.5261	2255445	11682	381457
Nanzheng District	2021	Hanzhong City	38971	3.90674	703071	211	29735	23	14833	16.9609	2397475	12375	401654
Chenggu County	2012	Hanzhong City	24326	5.74805	612689	270	17972	20	34124	49.9537	1203000	7309	360177
Chenggu County	2013	Hanzhong City	24325	5.82134	679674	316	18320	23	34435	50.8121	1382900	8383	386404
Chenggu County	2014	Hanzhong City	24150	5.81064	726539	362	18668	24	37016	43.1623	1688400	9473	415806
Chenggu County	2015	Hanzhong City	24143	5.84091	748832	363	18835	25	37417	35.7423	1925200	8236	427740
Chenggu County	2016	Hanzhong City	23999	5.8902	800481	364	18856	23	35241	37.9551	2172200	8953	457472
Chenggu County	2017	Hanzhong City	23908	5.91656	819382	393	19045	24	34018	35.3924	2467400	9670	469339
Chenggu County	2018	Hanzhong City	23797	6.52565	760152	340	19234	25	34778	31.9138	2603995	10387	432376
Chenggu County	2019	Hanzhong City	23781	6.50822	834598	334	19423	25	34465	28.4353	2324408	11104	474962
Chenggu County	2020	Hanzhong City	23765	6.49079	909044	335	19612	25	34152	24.9567	2514139	11821	542041
Chenggu County	2021	Hanzhong City	23749	6.47335	983490	436	19801	25	33839	21.4781	2824379	12538	578098
Yang County	2012	Hanzhong City	27923	5.57454	322047	219	11960	19	19694	52.558	737500	5755	191251
Yang County	2013	Hanzhong City	27732	5.6839	356278	271	12520	21	21910	53.5608	850500	6618	209442
Yang County	2014	Hanzhong City	27636	5.65219	380783	323	13080	22	23897	45.6273	944000	7419	224026
Yang County	2015	Hanzhong City	27790	5.65185	398639	326	13705	23	23273	39.0812	1002600	8164	233456
Yang County	2016	Hanzhong City	27972	5.63968	427962	335	22150	20	17296	41.1061	1065300	8882	250503
Yang County	2017	Hanzhong City	28031	5.61004	436301	281	22888	20	17180	37.6603	1209000	9600	255666
Yang County	2018	Hanzhong City	27968	5.91151	507236	263	23626	20	18822	33.3959	1400625	10318	291812
Yang County	2019	Hanzhong City	27962	5.90244	559221	267	24364	22	19487	29.1315	1631580	11036	321447
Yang County	2020	Hanzhong City	27956	5.89337	611206	473	25102	24	19800	24.8671	1723561	11754	368811
Yang County	2021	Hanzhong City	27950	5.88431	663191	487	25840	26	20113	20.6027	1929023	12472	380826
Xixiang County	2012	Hanzhong City	21711	4.526	264662	36	10676	32	14175	44.121	549600	5788	152579
Xixiang County	2013	Hanzhong City	21861	4.55258	294714	105	10716	33	14680	45.6904	652000	6662	163687
Xixiang County	2014	Hanzhong City	21950	4.49522	313732	174	10756	33	13607	38.7164	753800	7541	174215
Xixiang County	2015	Hanzhong City	21950	4.67112	330407	172	11600	35	13762	32.4015	812000	8180	184719
Xixiang County	2016	Hanzhong City	21950	4.68579	356141	194	10334	27	13672	33.0784	906900	8875	199633
Xixiang County	2017	Hanzhong City	21950	4.77103	362564	205	12643	27	12926	30.3229	1017300	9570	203102
Xixiang County	2018	Hanzhong City	22345	4.31345	372926	208	14952	24	13037	27.6839	1108536	10265	210869
Xixiang County	2019	Hanzhong City	22345	4.36433	417399	165	17261	23	11019	25.0448	1167013	10960	236645
Xixiang County	2020	Hanzhong City	22345	4.41522	461872	146	19570	22	9001	22.4058	1221203	11655	272621
Xixiang County	2021	Hanzhong City	22345	4.4661	506345	145	21879	21	6983	19.7667	1339840	12350	280730
Mian County	2012	Hanzhong City	26231	5.07011	304966	315	9432	13	20464	37.3927	965900	6642	169529
Mian County	2013	Hanzhong City	26284	5.12464	338204	342	10016	16	20595	37.2004	1054400	7612	182167
Mian County	2014	Hanzhong City	26321	5.07249	359608	369	10600	17	21516	32.0376	1114100	8556	195601
Mian County	2015	Hanzhong City	26480	4.95359	377187	303	11000	19	22150	25.6032	1057500	8189	204975
Mian County	2016	Hanzhong City	26605	4.98113	405494	297	11100	17	22377	27.5122	1011600	8910	221389
Mian County	2017	Hanzhong City	28034	4.68931	410295	1247	11267	17	22514	24.4701	1292700	9631	224060
Mian County	2018	Hanzhong City	28557	4.78405	377477	278	11434	19	21792	23.2459	1473784	10352	210299
Mian County	2019	Hanzhong City	28354	4.81484	418953	280	11601	20	21719	22.0216	1470256	11073	233970
Mian County	2020	Hanzhong City	28151	4.84564	460429	317	11768	21	21646	20.7974	1609297	11794	270599
Mian County	2021	Hanzhong City	27948	4.87643	501905	338	11935	22	21573	19.5731	1787398	12515	282492
Ningqiang County	2012	Hanzhong City	21256	3.86752	254727	-27	989	14	11787	34.957	485000	5754	152006
Ningqiang County	2013	Hanzhong City	21259	3.91622	283862	22	1173	15	11907	34.6817	558500	6548	164239
Ningqiang County	2014	Hanzhong City	21263	3.88228	301567	71	1357	17	11890	30.7496	619300	7373	174047
Ningqiang County	2015	Hanzhong City	21267	4.00776	315377	28	675	18	11882	23.9853	641200	8068	181927
Ningqiang County	2016	Hanzhong City	21249	4.03106	337556	31	1146	19	10162	26.0219	715400	8746	194908
Ningqiang County	2017	Hanzhong City	21296	4.10448	343467	127	1146	20	10206	22.669	833000	9424	198362
Ningqiang County	2018	Hanzhong City	21164	3.63041	287797	134	1146	21	10243	22.2076	890472	10102	161181
Ningqiang County	2019	Hanzhong City	21173	3.6923	319083	145	1146	21	10354	21.7462	1000117	10780	178968
Ningqiang County	2020	Hanzhong City	21182	3.75418	350369	155	1146	21	10465	21.2848	1066383	11458	206262
Ningqiang County	2021	Hanzhong City	21191	3.81607	381655	223	1146	21	10576	20.8233	1249922	12136	215192
Lueyang County	2012	Hanzhong City	10074	4.65942	131357	126	64	23	3480	33.3314	602300	5654	74647
Lueyang County	2013	Hanzhong City	10072	4.71922	145976	131	160	25	3664	35.9282	658700	6468	80621
Lueyang County	2014	Hanzhong City	10046	4.69032	155719	136	256	25	3642	31.0656	631900	7276	86095
Lueyang County	2015	Hanzhong City	10046	4.79474	162582	165	416	25	3670	24.7281	504600	8043	89369
Lueyang County	2016	Hanzhong City	10046	4.81993	173098	165	565	21	3608	26.3994	559400	8714	95494
Lueyang County	2017	Hanzhong City	10046	4.88792	177005	167	670	22	3577	22.9766	675400	9385	97777
Lueyang County	2018	Hanzhong City	10046	4.35825	149368	169	775	22	3394	21.6941	723484	10056	84478
Lueyang County	2019	Hanzhong City	10045	4.44241	166394	196	880	22	2500	20.4115	711655	10727	94358
Lueyang County	2020	Hanzhong City	10044	4.52657	183420	205	985	22	1606	19.1289	638300	11398	108500
Lueyang County	2021	Hanzhong City	10043	4.61072	200446	300	1090	22	712	17.8464	697000	12069	111900
Zhenba County	2012	Hanzhong City	23674	3.65452	215886	2	300	9	7339	28.0621	405000	5470	129472
Zhenba County	2013	Hanzhong City	23650	3.70499	240308	2	330	10	7701	27.6823	481400	6232	141844
Zhenba County	2014	Hanzhong City	23631	3.67589	257282	2	360	10	7150	26.1062	564200	7042	151722
Zhenba County	2015	Hanzhong City	23620	3.7898	268989	12	360	10	6236	18.9248	583000	8002	158167
Zhenba County	2016	Hanzhong City	23699	3.79683	287859	16	360	8	5331	20.0039	651700	8698	169318
Zhenba County	2017	Hanzhong City	23814	3.85849	295207	19	340	7	5930	17.4811	785100	9394	173650
Zhenba County	2018	Hanzhong City	24026	3.88679	299125	12.5	320	7	5997	17.1468	845579	10090	170605
Zhenba County	2019	Hanzhong City	24058	3.95781	331828	6	300	7	4704	16.8125	924474	10786	189611
Zhenba County	2020	Hanzhong City	24090	4.02883	364531	6	280	7	3411	16.4783	829889	11482	217898
Zhenba County	2021	Hanzhong City	24122	4.09985	397234	130	260	7	2118	16.144	946855	12178	223795
Liuba County	2012	Hanzhong City	3086	3.80687	42369	19	142	2	829	32.067	87800	5471	24832
Liuba County	2013	Hanzhong City	3086	3.85515	47257	18	186	3	829	29.8807	100700	6231	26786
Liuba County	2014	Hanzhong City	3066	3.81311	50856	17	230	3	829	25.446	114200	7047	28837
Liuba County	2015	Hanzhong City	3061	3.94381	52745	15	230	4	827	19.9143	127700	8015	29850
Liuba County	2016	Hanzhong City	3131	3.86873	56014	18	230	4	804	22.1808	141100	8712	31736
Liuba County	2017	Hanzhong City	3144	3.91953	57788	18	230	4	804	19.3058	156900	9409	32793
Liuba County	2018	Hanzhong City	3118	3.11931	52872	8	230	4	474	17.0878	169218	10106	29612
Liuba County	2019	Hanzhong City	3134	3.14901	58928	76	230	4	463	14.8698	186946	10803	33327
Liuba County	2020	Hanzhong City	3150	3.17871	64984	120	230	4	452	12.6519	199000	11500	38600
Liuba County	2021	Hanzhong City	3166	3.20842	71040	131	230	4	441	10.4339	220500	12197	40400
Foping County	2012	Hanzhong City	1833	4.66448	18252	1	425	2	536	38.4813	48300	5473	9868
Foping County	2013	Hanzhong City	1833	4.7234	20379	3	433	4	521	36.8119	57900	6272	10740
Foping County	2014	Hanzhong City	1871	4.58632	21795	5	441	4	561	32.8921	66500	7050	11775
Foping County	2015	Hanzhong City	1883	4.81306	23135	7	449	4	615	26.4988	73200	8030	12460
Foping County	2016	Hanzhong City	1854	4.90777	24469	9	457	3	603	27.4537	85600	8745	13220
Foping County	2017	Hanzhong City	1849	5.01028	25142	11	465	3	609	24.7623	98000	9460	13618
Foping County	2018	Hanzhong City	1855	4.8814	30361	13	473	3	604	21.9107	109026	10175	17397
Foping County	2019	Hanzhong City	1853	4.95737	33463	15	481	3	620	23.162	114767	10890	19181
Foping County	2020	Hanzhong City	1851	5.03333	36565	15	489	3	636	24.4132	118813	11605	22099
Foping County	2021	Hanzhong City	1849	5.1093	39667	17	497	3	652	25.6645	130502	12320	23082
Yuyang District	2012	Yulin City	53168	4.57173	359612			38	21406	21.7411	4010900	10001
Yuyang District	2013	Yulin City	63415	3.74303	395612			43	23090	24.2447	4612600	11331
Yuyang District	2014	Yulin City	65069	3.68284	430033			48	23922	19.8464	5085700	12656
Yuyang District	2015	Yulin City	63710	3.43579	444494			49	22877	18.8072	5431000	11015
Yuyang District	2016	Yulin City	77227	3.10433	503933			37	22908	17.0466	5567200	11929
Yuyang District	2017	Yulin City	82310	2.94178	512097			39	22900	17.2724	6984700	12843
Yuyang District	2018	Yulin City	82747	5.43153	648923			42	38100	18.975	7772800	13757
Yuyang District	2019	Yulin City	84976	5.3157	714010			43	37707	20.6775	9371400	14671
Yuyang District	2020	Yulin City	87205	5.19987	779097			44	37314	22.3801	10010200	15585
Yuyang District	2021	Yulin City	89434	5.08404	844184			45	36921	24.0826	10649000	16499
Hengshan District	2012	Yulin City	59573	2.56395	205689	244	8749	24	14993	26.4698	1042200	7860	121600
Hengshan District	2013	Yulin City	60855	2.5755	232421	257	8749	25	11842	19.8238	1218500	8725	133525
Hengshan District	2014	Yulin City	60619	2.60658	246554	270	8749	28	11881	21.0795	1360900	9364	141900
Hengshan District	2015	Yulin City	60623	2.57328	248690	270	8900	29	11894	18.8863	1165100	9760	142500
Hengshan District	2016	Yulin City	65408	2.55327	111732	292	8810	17	12026	18.3798	1211600	10522	152300
Hengshan District	2017	Yulin City	81393	2.17393	286790	295	7200	19	12239	19.9687	1544600	11284	164042
Hengshan District	2018	Yulin City	81315	3.28128	422450	77	5590	27	12430	21.5577	1894400	12046	231700
Hengshan District	2019	Yulin City	81384	3.28439	474796	340	3980	22	12488	23.1466	2014700	12808	261200
Hengshan District	2020	Yulin City	81453	3.28751	527142	300	2370	17	12546	24.7356	1994305	13570	267212
Hengshan District	2021	Yulin City	81522	3.29062	579488	300	760	12	12604	26.3245	2734700	14332	278800
Fugu County	2012	Yulin City	43260	1.58139	86360	242		32	6104	33.2565	4505200	11783	52134
Fugu County	2013	Yulin City	43263	1.50651	92635	210	1340	32	6064	34.7843	4353800	13001	54279
Fugu County	2014	Yulin City	43263	1.55361	101206	178		32	6060	28.3396	4365300	13409	59581
Fugu County	2015	Yulin City	43263	0.74863	100327	178		34	5570	27.1646	3837600	10871	58379
Fugu County	2016	Yulin City	43263	1.34968	238197	139		23	7300	24.5469	3925700	11610	65011
Fugu County	2017	Yulin City	43263	1.39891	117485	127		23	6900	26.2895	4856300	12349	89576
Fugu County	2018	Yulin City	43263	1.60521	155654	113		24	5861	25.4035	5395771	13088	88646
Fugu County	2019	Yulin City	43263	1.60537	168525	119		24	5401	24.5175	6175064	13827	95730
Fugu County	2020	Yulin City	43263	1.60553	181396	82		24	4941	23.6315	5828060	14566	105611
Fugu County	2021	Yulin City	43263	1.60569	194267	67		24	4481	22.7455	7358846	15305	109214
Jingbian County	2012	Yulin City	80154	2.89141	317568	1168.5	19314	45	8791	22.7777	3170500	11413	166500
Jingbian County	2013	Yulin City	80154	2.96256	350910	2270	24657	47	8483	21.6175	3521600	12680	176301
Jingbian County	2014	Yulin City	85194	2.52562	355569	2264	30000	55	8891	15.9825	3651900	13086	196000
Jingbian County	2015	Yulin City	85751	2.74994	399931	2344	32000	58	8590	18.0242	2668400	11058	197358
Jingbian County	2016	Yulin City	85785	2.97629	412931	2344	30667	45	12049	15.9056	2449400	11910	221303
Jingbian County	2017	Yulin City	85800	3.83049	529672	2344	60031	47	16724	13.8514	3039100	12762	284792
Jingbian County	2018	Yulin City	85834	3.72249	563266	2133	89395	21	12100	15.2286	2962350	13614	280570
Jingbian County	2019	Yulin City	85868	3.61449	596860	2133	118759	54	12149	16.6058	3898506	14466	317012
Jingbian County	2020	Yulin City	85902	3.50648	630454	2596	148123	87	12198	17.983	3633295	15318	344774
Jingbian County	2021	Yulin City	134162	2.1035	249735	2596	8034	44	27784	30.1637	4500225	8240	364591
Dingbian County	2012	Yulin City	136878	2.14636	293266	1853	19113	50	30142	29.1927	2910100	9492	143396
Dingbian County	2013	Yulin City	138925	2.14844	323520	1110	30192	56	32500	28.2216	3100800	10744	163825
Dingbian County	2014	Yulin City	152968	1.76868	323223	1327	41271	61	30184	22.095	3383900	11829	181400
Dingbian County	2015	Yulin City	161502	1.84783	354825	1434	45066	63	29881	23.1504	2576300	10926	178982
Dingbian County	2016	Yulin City	212526	1.37454	363114	1319	109244	46	29344	22.1493	2300300	11789	196400
Dingbian County	2017	Yulin City	213526	1.75643	472420	1352	119236	53	34221	18.3373	2553200	12652	200321
Dingbian County	2018	Yulin City	213526	1.75282	488718	999	129228	50	34226	19.4267	3172840	13515	267420
Dingbian County	2019	Yulin City	213526	1.74921	505016	860	139220	60	34054	20.5162	3176191	14378	278693
Dingbian County	2020	Yulin City	213526	1.7456	521314	1333	149212	70	33882	21.6057	2631600	15241	302900
Dingbian County	2021	Yulin City	41557	2.11594	146772	914		14	14772	35.2932	3417158	5934	336793
Suide County	2012	Yulin City	41727	2.09485	158733	723		15	14854	35.1611	476200	6630	90860
Suide County	2013	Yulin City	41741	2.15364	171872	532		16	14936	35.029	539500	7326	96035
Suide County	2014	Yulin City	41741	2.01006	167692	532		18	15013	27.9607	540900	8227	104284
Suide County	2015	Yulin City	43083	2.11176	183963	532		19	14941	29.9051	588700	8240	100400
Suide County	2016	Yulin City	48323	1.96753	193974	532		15	14959	24.7453	671500	8949	109830
Suide County	2017	Yulin City	52394	4.64355	334733	532		17	14827	26.3838	758700	9658	115768
Suide County	2018	Yulin City	52405	4.65278	356059	688		58	14870	26.4514	939738	10367	197270
Suide County	2019	Yulin City	52416	4.66202	377385	155		17	14635	26.519	905484	11076	209808
Suide County	2020	Yulin City	52427	4.67125	398711	170		-24	14400	26.5866	1001520	11785	217430
Suide County	2021	Yulin City	27859	2.99501	86083	170		11	4993	26.0017	1111707	6728	224362
Mizhi County	2012	Yulin City	27859	3.06608	93653	94		14	5117	28.1695	401200	7509	52844
Mizhi County	2013	Yulin City	27865	3.16095	100865	18	923	17	5241	30.3373	466400	8290	55114
Mizhi County	2014	Yulin City	27865	3.13748	97077	26		18	5237	23.7475	486600	8903	59630
Mizhi County	2015	Yulin City	27866	3.59643	118896	13		18	5243	25.3741	415300	8894	56687
Mizhi County	2016	Yulin City	27870	3.81453	123884	13		14	5244	20.5617	448400	9658	69971
Mizhi County	2017	Yulin City	27870	4.80434	167591	22		15	5239	22.5758	480000	10422	72778
Mizhi County	2018	Yulin City	27870	4.80675	192511	27		17	5237	23.2061	575800	11186	96000
Mizhi County	2019	Yulin City	27870	4.80915	217431	19		15	5284	23.8364	655712	11950	110767
Mizhi County	2020	Yulin City	27870	4.81155	242351	19		13	5331	24.4667	628700	12714	121000
Mizhi County	2021	Yulin City	31225	2.26517	141701	19	133	10	33292	26.8741	700700	5562	131200
Jia County	2012	Yulin City	30838	2.35518	147758	31.5	133	11	18334	28.991	318600	6408	89100
Jia County	2013	Yulin City	30844	2.48771	155538	44	133	12	3376	31.1079	365600	7254	89195
Jia County	2014	Yulin City	30844	2.44877	151820	50	133	14	4091	25.2012	414700	8162	94000
Jia County	2015	Yulin City	33590	2.28229	176965	62	133	16	4160	25.667	344400	8174	90629
Jia County	2016	Yulin City	58808	1.4868	186577	58	133	12	3495	22.4242	398000	8893	106031
Jia County	2017	Yulin City	53404	3.70721	289748	64	133	13	3159	24.6368	505100	9612	111300
Jia County	2018	Yulin City	53405	3.71493	307097	36.5	133	15	3206	24.4564	549186	10331	167709
Jia County	2019	Yulin City	53406	3.72265	324446	9	133	15	3238	24.276	575895	11050	177571
Jia County	2020	Yulin City	53407	3.73037	341795	68	133	15	3270	24.0957	633332	11769	182871
Jia County	2021	Yulin City	8120	2.18645	34621	68		7	952	43.0201	717500	5764	193100
Wubu County	2012	Yulin City	8113	2.24664	36487	40.5		7	954	42.3493	137700	6558	22083
Wubu County	2013	Yulin City	8101	2.32268	39133	13		7	956	41.6785	159900	7352	22792
Wubu County	2014	Yulin City	8098	2.27958	38156	13		7	957	34.496	178000	8242	25000
Wubu County	2015	Yulin City	8092	2.83304	50695	13		8	957	34.3437	167600	8155	24014
Wubu County	2016	Yulin City	8089	3.1868	53581	52		4	931	32.3037	179700	8881	32070
Wubu County	2017	Yulin City	8077	6.87854	91282	146		4	907	34.0301	208800	9607	33883
Wubu County	2018	Yulin City	8069	6.89292	102165	84		13	907	32.2991	234071	10333	54541
Wubu County	2019	Yulin City	8061	6.9073	113048	22		5	906	30.568	269128	11059	61057
Wubu County	2020	Yulin City	8053	6.92168	123931	22		-3	905	28.8369	286112	11785	64106
Wubu County	2021	Yulin City	26647	2.69295	180483	18		12	3624	36.1098	312865	5648	66107
Qingjian County	2012	Yulin City	26820	2.71786	198024	142.5		14	4512	37.2426	306800	6500	114101
Qingjian County	2013	Yulin City	27078	2.77417	197172	267		16	5400	38.3754	354600	7352	123147
Qingjian County	2014	Yulin City	27079	3.11862	191669	205		17	5207	29.4236	394000	8234	119534
Qingjian County	2015	Yulin City	27099	2.92022	207813	212		18	5323	31.4023	410500	8234	116514
Qingjian County	2016	Yulin City	27319	3.04857	217007	268		13	5327	25.5525	439100	8918	126228
Qingjian County	2017	Yulin City	27364	3.98377	305699	271		14	5328	26.9476	510800	9602	131400
Qingjian County	2018	Yulin City	27365	3.99119	328863	158		5	5066	27.1037	585700	10286	180900
Qingjian County	2019	Yulin City	27366	3.99861	352027	201		14	5069	27.2597	614100	10970	194600
Qingjian County	2020	Yulin City	27367	4.00603	375191	222		23	5072	27.4157	630830	11654	212440
Qingjian County	2021	Yulin City	29748	3.73084	140797	227		9	14401	26.6726	696500	5770	236300
Zizhou County	2012	Yulin City	29789	3.4362	155906	125		10	14364	28.1591	401600	6582	88166
Zizhou County	2013	Yulin City	30484	3.47389	168958	23		11	14327	29.6456	484000	7394	95129
Zizhou County	2014	Yulin City	30440	2.31567	166563	25		13	14343	21.8047	522600	8296	103415
Zizhou County	2015	Yulin City	30594	3.3115	196008	29		13	14342	24.5712	440300	8322	100646
Zizhou County	2016	Yulin City	30473	3.41489	212211	29		10	14497	20.0478	557100	9046	119300
Zizhou County	2017	Yulin City	30628	6.00118	281097	34		10	14571	20.5654	624600	9770	128961
Zizhou County	2018	Yulin City	30628	5.80887	290372	35		14	14482	22.7186	636324	10494	164718
Zizhou County	2019	Yulin City	30628	5.61656	299647	20		10	14449	24.8719	599600	11218	169900
Zizhou County	2020	Yulin City	30628	5.42425	308922	40		6	14416	27.0252	679304	11942	187304
Zizhou County	2021	Yulin City	45155	2.6826	180649	41		29	9254	26.4532	772800	11849	196800
Shenmu City	2012	Yulin City	45155	2.74572	205324	804		29	9020	27.5685	10038900	12537	106316
Shenmu City	2013	Yulin City	48474	2.56057	214584	1567		29	8786	28.6839	9255400	13225	114564
Shenmu City	2014	Yulin City	81855	1.49975	215555	1587		40	8552	23.9101	9682400	13622	119740
Shenmu City	2015	Yulin City	81990	1.52782	280183	2801		41	8318	22.642	8174100	12046	119900
Shenmu City	2016	Yulin City	82142	1.5817	242464	2800		24	8084	20.2388	9048000	12875	132385
Shenmu City	2017	Yulin City	82279	3.02509	361933	764		26	7850	21.6898	11103300	13704	191921
Shenmu City	2018	Yulin City	82850	3.06121	410931	520.5		10	7616	22.4849	12980300	14533	198700
Shenmu City	2019	Yulin City	83421	3.09733	459929	277		28	12438	23.2801	13628777	15362	226324
Shenmu City	2020	Yulin City	83992	3.13345	508927	759		46	17260	24.0753	12940036	16191	261161
Shenmu City	2021	Yulin City	43255	5.02515	322257	774		35	50545	39.4079	18481700	5109	267500
Hanbin District	2012	Ankang City	42932	5.09243	361282			39	49910	42.4777	1630300	5920
Hanbin District	2013	Ankang City	42740	5.01081	376875			43	49275	45.5474	1874700	6731
Hanbin District	2014	Ankang City	41938	5.10902	387029			53	48469	40.969	2103900	7572
Hanbin District	2015	Ankang City	41582	5.17534	403961			55	50444	34.0474	2337200	7849
Hanbin District	2016	Ankang City	40841	5.21006	421483			56	50841	35.4906	2521600	8506
Hanbin District	2017	Ankang City	40706	4.58655	543078			58	52155	33.056	2909200	9163
Hanbin District	2018	Ankang City	40566	4.67596	605722			62	51051	30.5877	3423600	9820
Hanbin District	2019	Ankang City	40426	4.76537	668366			66	48270	28.1193	3809500	10477
Hanbin District	2020	Ankang City	40286	4.85479	731010			70	45489	25.6509	3758200	11134
Hanbin District	2021	Ankang City	23285	4.29577	167092	863	-18605	17	11116	43.9732	362300	5018	86017
Hanyin County	2012	Ankang City	23269	4.40298	189776	875	-4070	18	11086	46.4147	474200	5938	98234
Hanyin County	2013	Ankang City	23041	4.48201	200726	887	10465	19	11056	48.8561	586100	6858	110451
Hanyin County	2014	Ankang City	22947	4.41051	208869	899	25000	22	10967	43.3125	684400	7797	116776
Hanyin County	2015	Ankang City	22901	4.4385	218373	1054	2586	22	11070	35.5377	775000	8063	122571
Hanyin County	2016	Ankang City	22919	4.38117	230978	858	6400	23	10868	36.8542	861600	8745	127794
Hanyin County	2017	Ankang City	22811	4.22003	254803	858	6473	24	10729	33.8294	951900	9427	134402
Hanyin County	2018	Ankang City	22630	4.34145	283381	817	6546	25	10730	32.1295	1076703	10109	145358
Hanyin County	2019	Ankang City	22449	4.46287	311959	734	6619	26	10216	30.4297	1125018	10791	162161
Hanyin County	2020	Ankang City	22268	4.5843	340537	746	6692	27	9702	28.7298	1001545	11473	185670
Hanyin County	2021	Ankang City	13086	5.07863	96428	745	2639	12	5222	48.7355	1109114	5110	191142
Shiquan County	2012	Ankang City	13099	5.11856	107031	381	2718	12	5514	52.7041	418500	5948	56071
Shiquan County	2013	Ankang City	13100	5.10374	110801	17	2797	12	5806	56.6727	477900	6786	60987
Shiquan County	2014	Ankang City	13111	5.33224	115214	18	2876	12	5538	49.1335	547600	7675	63252
Shiquan County	2015	Ankang City	13118	5.3871	122292	20	2967	13	5466	40.5217	629800	8011	65495
Shiquan County	2016	Ankang City	13129	5.42159	126860	27	3600	13	5202	42.5217	714300	8753	69592
Shiquan County	2017	Ankang City	13094	4.67359	147740	49	3700	14	4835	38.9446	809600	9495	72620
Shiquan County	2018	Ankang City	13141	4.76105	167163	409	3800	15	4771	36.1625	961924	10237	82515
Shiquan County	2019	Ankang City	13188	4.84852	186586	416	3900	16	4613	33.3804	941383	10979	93090
Shiquan County	2020	Ankang City	13235	4.93598	206009	371	4000	17	4455	30.5983	830204	11721	107053
Shiquan County	2021	Ankang City	3386	5.86178	62968	410		5	437	32.1595	938900	4813	110800
Ningshan County	2012	Ankang City	3390	5.88053	70647	206.5		5	393	31.3047	189300	5629	35313
Ningshan County	2013	Ankang City	3392	5.66392	74604	3		5	349	30.4499	213500	6445	38508
Ningshan County	2014	Ankang City	3403	5.70761	77333	2		5	348	27.1874	222200	7315	40626
Ningshan County	2015	Ankang City	3404	5.76116	80355	2		5	345	22.6626	245200	7625	42044
Ningshan County	2016	Ankang City	3404	5.77761	85387	2		6	345	20.0598	266200	8270	43422
Ningshan County	2017	Ankang City	3404	3.56257	94280	2		6	344	19.1096	301600	8915	46024
Ningshan County	2018	Ankang City	3414	3.63035	103156	14		6	340	17.749	346916	9560	49573
Ningshan County	2019	Ankang City	3424	3.69812	112032	66		7	334	16.3884	317203	10205	54192
Ningshan County	2020	Ankang City	3434	3.76589	120908	81		8	339	15.0279	231580	10850	60823
Ningshan County	2021	Ankang City	24386	4.38235	175284	101		14	5204	34.5725	243400	5083	62700
Ziyang County	2012	Ankang City	24370	4.44707	184765	54		14	5204	35.7751	467000	5966	100901
Ziyang County	2013	Ankang City	24249	4.4987	193078	7		14	5204	36.9777	543800	6849	103781
Ziyang County	2014	Ankang City	24259	4.58844	196564	7		16	5153	34.1914	647900	7794	109509
Ziyang County	2015	Ankang City	24255	4.59695	201530	7		16	5126	27.7316	745800	8051	110143
Ziyang County	2016	Ankang City	24036	4.67049	209496	7		17	4919	29.1481	804800	8789	113435
Ziyang County	2017	Ankang City	22691	4.53907	253083	50		17	4726	26.3088	907700	9527	118393
Ziyang County	2018	Ankang City	22578	4.65378	281583	291		18	5100	24.8783	1036503	10265	140222
Ziyang County	2019	Ankang City	22465	4.76849	310083	46		20	3748	23.4477	1095914	11003	155465
Ziyang County	2020	Ankang City	22352	4.8832	338583	12		22	2396	22.0172	1005299	11741	177368
Ziyang County	2021	Ankang City	17168	3.72862	90850	12	9	8	5451	26.4703	1078442	4973	188624
Langao County	2012	Ankang City	17184	3.79085	102303	38.5	10	8	5064	26.092	255600	5755	52235
Langao County	2013	Ankang City	17180	3.81432	106117	65	11	8	4677	25.7138	309600	6537	57767
Langao County	2014	Ankang City	16807	4.00369	112891	78	12	9	4654	23.2995	351100	7348	60251
Langao County	2015	Ankang City	17050	3.9827	119031	91	13	9	4809	19.6873	401300	7707	63912
Langao County	2016	Ankang City	17057	4.02075	124159	78	14	10	4629	19.5067	455300	8374	66841
Langao County	2017	Ankang City	16806	2.46918	145256	7	120	10	4415	17.2164	525500	9041	69781
Langao County	2018	Ankang City	16811	2.51776	162530	54	226	10	4365	16.6383	593565	9708	81998
Langao County	2019	Ankang City	16816	2.56633	179804	333	332	11	4157	16.0602	580189	10375	91471
Langao County	2020	Ankang City	16821	2.61491	197078	7	438	12	3949	15.4822	486901	11042	103894
Langao County	2021	Ankang City	18379	4.00609	150436	7	-185	10	4626	27.9186	550004	5329	109633
Pingli County	2012	Ankang City	18372	4.0301	169512	1287.5	-80	11	4649	29.1651	402100	6247	84331
Pingli County	2013	Ankang City	18332	4.04386	176836	2568	25	12	4672	30.4116	505000	7165	93205
Pingli County	2014	Ankang City	18287	4.20506	183856	2568	130	13	4789	26.9421	605900	8147	97246
Pingli County	2015	Ankang City	18152	4.27672	192619	2568	140	13	4783	23.0317	679300	8130	100433
Pingli County	2016	Ankang City	18245	4.28605	200479	2568	2000	14	4518	22.9596	772900	8859	105027
Pingli County	2017	Ankang City	18216	3.10205	201731	2568	2160	15	4387	20.8372	875200	9588	109182
Pingli County	2018	Ankang City	18599	3.09726	224838	2568	2320	16	4377	19.4165	996248	10317	106890
Pingli County	2019	Ankang City	18982	3.09247	247945	264	2480	18	4089	17.9959	1038998	11046	119373
Pingli County	2020	Ankang City	19365	3.08768	271052	270	2640	20	3936	16.5752	890956	11775	137392
Pingli County	2021	Ankang City	4943	5.49869	46773	65		4	1133	23.9365	1040659	4890	145467
Zhenping County	2012	Ankang City	4948	5.53011	52640	39		4	1277	21.6546	120000	5673	25484
Zhenping County	2013	Ankang City	4966	5.44825	55179	13		4	1421	19.3727	129500	6456	28349
Zhenping County	2014	Ankang City	4965	5.54562	57384	13		4	1398	16.1593	120600	7360	29761
Zhenping County	2015	Ankang City	4981	5.59546	59927	13		4	1399	13.5315	135600	7728	31041
Zhenping County	2016	Ankang City	4933	5.66572	63301	6		5	1383	13.4282	152600	8413	32174
Zhenping County	2017	Ankang City	4926	4.27852	76017	13		5	1352	12.0153	191900	9098	34170
Zhenping County	2018	Ankang City	4955	4.3439	84561	13		5	1328	10.7976	230279	9783	39798
Zhenping County	2019	Ankang City	4984	4.40927	93105	15		5	1317	9.58001	243411	10468	44320
Zhenping County	2020	Ankang City	5013	4.47464	101649	15		5	1306	8.36239	237697	11153	50156
Zhenping County	2021	Ankang City	36208	3.3167	190068	16	-6073	19	23910	32.4675	261890	5065	50575
Xunyang County	2012	Ankang City	36361	3.37309	212778	495.5	-2782	23	23823	37.0773	843100	5911	104974
Xunyang County	2013	Ankang City	36410	3.39764	222456	975	509	27	23736	41.687	1000100	6757	115745
Xunyang County	2014	Ankang City	36542	3.43391	229561	1039	3800	29	24555	36.4712	1123700	7655	120872
Xunyang County	2015	Ankang City	36650	3.44044	241290	982	3850	30	23448	31.4155	1240900	7900	124355
Xunyang County	2016	Ankang City	36659	3.44791	249653	620	3968	30	23326	31.2101	1378300	8608	129949
Xunyang County	2017	Ankang City	36600	3.15462	333308	531	3992	31	22859	29.076	1598700	9316	135189
Xunyang County	2018	Ankang City	36772	3.20293	375542	541	4016	32	22732	26.789	1879857	10024	175666
Xunyang County	2019	Ankang City	36944	3.25123	417776	513	4040	34	22724	24.502	1870492	10732	198324
Xunyang County	2020	Ankang City	37116	3.29954	460010	496	4064	36	22716	22.215	1734798	11440	228310
Xunyang County	2021	Ankang City	13840	4.0698	101752	491		11	7947	29.5466	2007363	5004	234817
Baihe County	2012	Ankang City	13895	4.08104	115437	249		12	6973	34.7129	339100	5798	59980
Baihe County	2013	Ankang City	13885	4.13136	120819	7		13	5999	39.8792	415600	6592	66601
Baihe County	2014	Ankang City	14097	4.12712	126822	7		13	5873	34.1756	482700	7416	69993
Baihe County	2015	Ankang City	14097	4.14102	131233	10		14	5817	30.0917	524300	7768	73508
Baihe County	2016	Ankang City	14096	4.17849	136801	11		14	6106	28.8297	595400	8417	75946
Baihe County	2017	Ankang City	14097	4.02398	171639	11		14	5865	27.4334	675100	9066	79097
Baihe County	2018	Ankang City	14154	4.04472	190115	14		15	5644	25.7356	791735	9715	97167
Baihe County	2019	Ankang City	14211	4.06547	208591	134		16	5538	24.0377	798439	10364	107582
Baihe County	2020	Ankang City	14268	4.08621	227067	138		17	5432	22.3399	710627	11013	122457
Baihe County	2021	Ankang City	21578	4.9861	205123	141	-999	14	15855	40.8671	792362	4624	129071
Shangzhou District	2012	Shangluo City	21378	5.05674	230111	158	-266	15	11427	40.0253	986100	5414	120164
Shangzhou District	2013	Shangluo City	21230	3.82398	243724	175	467	16	6999	39.1834	1083500	6204	128682
Shangzhou District	2014	Shangluo City	20972	4.98856	241200	230	1200	17	6582	34.242	1176500	7066	136167
Shangzhou District	2015	Shangluo City	20967	5.02175	257463	239	1000	17	6055	33.0343	1229000	7614	132005
Shangzhou District	2016	Shangluo City	21112	4.63092	262074	223	1070	10	9776	29.6562	1360900	8230	139534
Shangzhou District	2017	Shangluo City	21344	4.23613	257676	270	1200	10	8660	29.9714	1535100	8846	142484
Shangzhou District	2018	Shangluo City	21448	4.26086	288665	172	1330	10	7731	26.8141	1535104	9462	142484
Shangzhou District	2019	Shangluo City	21552	4.28559	319654	295	1460	10	6902	23.6567	1567480	10078	159040
Shangzhou District	2020	Shangluo City	21656	4.31033	350643	301	1590	10	6073	20.4994	1415900	10694	185040
Shangzhou District	2021	Shangluo City	31457	5.19487	310000	342	-30	14	16317	38.5624	1515730	4770	188430
Luonan County	2012	Shangluo City	31671	5.30703	344618	272.5	0	15	17234	37.6619	706900	5592	172150
Luonan County	2013	Shangluo City	31794	4.4688	364527	203	30	16	18151	36.7615	828400	6414	186237
Luonan County	2014	Shangluo City	31892	5.09012	368882	243	60	17	18407	31.4306	920600	7301	198025
Luonan County	2015	Shangluo City	31974	5.14283	389686	357	220	18	17832	30.2705	991700	7705	206134
Luonan County	2016	Shangluo City	32018	4.99219	388553	352	250	15	17683	24.4928	1133900	8375	214168
Luonan County	2017	Shangluo City	32140	3.85227	376736	386	298	15	16908	24.8978	1367000	9045	218820
Luonan County	2018	Shangluo City	32260	3.74671	417801	358	346	15	16790	22.9606	1406450	9715	210290
Luonan County	2019	Shangluo City	32380	3.64116	458866	270	394	16	14400	21.0235	1485570	10385	227170
Luonan County	2020	Shangluo City	32500	3.5356	499931	336	442	17	12010	19.0863	1185410	11055	229300
Luonan County	2021	Shangluo City	12307	5.2939	186654	339		6	5689	36.1868	1379080	4739	236580
Danfeng County	2012	Shangluo City	12185	5.35938	199680	196		6	5709	39.2762	528300	5536	103381
Danfeng County	2013	Shangluo City	12163	4.20472	207058	53		6	5729	42.3657	622300	6333	106139
Danfeng County	2014	Shangluo City	12163	4.9445	209831	35		9	5542	34.6254	732000	7149	110632
Danfeng County	2015	Shangluo City	12090	5.05575	218054	41		9	5374	32.5795	789400	7701	109179
Danfeng County	2016	Shangluo City	12118	5.02616	222008	62		5	5307	29.5123	866700	8340	110405
Danfeng County	2017	Shangluo City	12059	4.509	212013	72		5	5219	29.864	972300	8979	112978
Danfeng County	2018	Shangluo City	12054	4.39514	230072	81.5		5	5166	28.5236	990490	9618	107410
Danfeng County	2019	Shangluo City	12049	4.28128	248131	91		5	5220	27.1833	980180	10257	113530
Danfeng County	2020	Shangluo City	12044	4.16742	266190	83		5	5274	25.8429	889430	10896	137320
Danfeng County	2021	Shangluo City	14201	4.34709	201808	85	592	6	5249	33.2543	995130	4658	151390
Shangnan County	2012	Shangluo City	14153	4.42026	217129	106.5	603	7	5307	39.2278	473900	5529	111230
Shangnan County	2013	Shangluo City	14138	3.48932	227986	128	614	8	5365	45.2012	539200	6400	119700
Shangnan County	2014	Shangluo City	14126	4.00241	226022	178	625	10	5294	35.9194	633900	7219	118620
Shangnan County	2015	Shangluo City	14038	4.0753	238841	202	625	10	5070	34.0739	689200	7739	117170
Shangnan County	2016	Shangluo City	14080	4.18594	247066	267	630	8	5038	30.7963	763100	8420	123150
Shangnan County	2017	Shangluo City	14123	2.06011	239508	351	635	8	4952	30.935	875400	9101	122858
Shangnan County	2018	Shangluo City	14095	2.19099	255275	357	640	8	4855	29.307	879026	9782	119166
Shangnan County	2019	Shangluo City	14067	2.32186	271042	244	645	8	4492	27.679	914150	10463	129880
Shangnan County	2020	Shangluo City	14039	2.45274	286809	222	650	8	4129	26.0511	814284	11144	146990
Shangnan County	2021	Shangluo City	24006	4.61243	210779	225	2500	16	8859	31.4187	940560	4738	150050
Shanyang County	2012	Shangluo City	24001	4.64468	250496	360	2650	17	8830	34.3256	660700	5606	128900
Shanyang County	2013	Shangluo City	24003	3.61671	282881	495	2800	18	8801	37.2325	807800	6474	146453
Shanyang County	2014	Shangluo City	23992	4.22495	300646	436	2950	19	8853	30.9143	955100	7380	165230
Shanyang County	2015	Shangluo City	23975	4.27775	330490	419	2950	19	8864	28.8955	1040500	7850	174620
Shanyang County	2016	Shangluo City	23971	4.48196	333186	387	3046	12	8817	26.9038	1213000	8501	192380
Shanyang County	2017	Shangluo City	23964	3.57787	317819	437	3166	12	8965	26.9917	1443500	9152	196460
Shanyang County	2018	Shangluo City	23964	3.558	347520	351	3286	12	8538	24.1909	1479530	9803	186360
Shanyang County	2019	Shangluo City	23964	3.53814	377221	161	3406	12	8218	21.39	1528780	10454	202460
Shanyang County	2020	Shangluo City	23964	3.51828	406922	119	3526	12	8066	18.5891	1443240	11105	218700
Shanyang County	2021	Shangluo City	21569	4.28866	187819	135	1050	13	8299	37.6435	1717490	4776	220810
Zhen’an County	2012	Shangluo City	21559	4.31101	208394	106	1055	13	8477	38.1837	573700	5585	105658
Zhen’an County	2013	Shangluo City	21586	3.50417	216494	77	1060	13	8655	38.7239	661900	6394	114976
Zhen’an County	2014	Shangluo City	21961	3.94395	209866	70	1065	15	8638	34.6344	775000	7276	118900
Zhen’an County	2015	Shangluo City	21899	4.00429	214784	66	1070	15	8127	30.5778	839100	7750	115449
Zhen’an County	2016	Shangluo City	21746	4.10572	219282	64	1075	12	8240	29.6922	897900	8370	117770
Zhen’an County	2017	Shangluo City	21667	3.38206	218244	101	1080	13	8122	29.0907	1060000	8990	123594
Zhen’an County	2018	Shangluo City	21441	3.30805	239912	102	1085	13	8185	25.7172	1111990	9610	121740
Zhen’an County	2019	Shangluo City	21215	3.23405	261580	105	1090	13	7981	22.3437	1058650	10230	131880
Zhen’an County	2020	Shangluo City	20989	3.16005	283248	116	1095	13	8103	18.9702	880640	10850	150290
Zhen’an County	2021	Shangluo City	8481	4.93362	93320	116	311	7	5084	30.9863	1002180	4586	158550
Zhashui County	2012	Shangluo City	8481	4.98208	109728	59	314	7	5183	30.1044	510900	5446	52765
Zhashui County	2013	Shangluo City	8481	4.22026	116521	2	317	7	5282	29.2226	609500	6306	62040
Zhashui County	2014	Shangluo City	8481	4.82797	126000	2	320	7	4904	26.6789	641800	7168	60580
Zhashui County	2015	Shangluo City	8667	4.78251	131341	2	320	7	4712	25.0206	661700	7622	63000
Zhashui County	2016	Shangluo City	8684	4.90108	139276	2	320	5	4694	21.1611	747900	8277	66300
Zhashui County	2017	Shangluo City	8691	5.04464	131526	5	300	5	4504	21.1306	749800	8932	66200
Zhashui County	2018	Shangluo City	8692	4.51312	151455	2	280	5	4510	19.6282	745600	9587	61600
Zhashui County	2019	Shangluo City	8693	3.98159	171384	60	260	5	4430	18.1257	837300	10242	73800
Zhashui County	2020	Shangluo City	8694	3.45006	191313	95	240	5	4350	16.6232	765400	10897	77300
Zhashui County	2021	Shangluo City				96	240	5			972700	.	79200

## Sheet: High-standard Farmland County
County/District	Year	City	C11（Common cultivated land area）	C12（Grain output per unit area）	C13（Gross output value of agriculture, forestry, animal husbandry and fishery）	b21（Area occupied by facility agriculture）	b22（Machine harvesting area）	b23（Total power of agricultural machinery）	b31（Amount of Agricultural Chemical Fertilizer Applied (Pure Equivalent)）	b32（pm2.5）	b41(Gross Regional Product)	b42（Per capital disposable income of rural residents）	b43（Value added of primary industry）
Baqiao District	2012	Xi’an City	10511	5.81125	245553			18	24996	114	2333000	13278	160800
Baqiao District	2013	Xi’an City	9840	5.72866	279503			17.93	20944	102	2690300	15203	183200
Baqiao District	2014	Xi’an City	9241	5.7194	300728			15.87	20863	80.18	2933000	16982	197500
Baqiao District	2015	Xi’an City	8709	6.20863	307940			16	20851	63	3322800	18891	187400
Baqiao District	2016	Xi’an City	5242	10.028	327061			14.51	18999	71	3297800	20431	197300
Baqiao District	2017	Xi’an City	4840	10.2572	364717			14	7484	75	4283500	21971	218200
Baqiao District	2018	Xi’an City	4438	6.23547	311278			13	7121	63	4807800	23511	181900
Baqiao District	2019	Xi’an City	3715	6.64441	327267			12	2352	56	4891900	25051	192300
Baqiao District	2020	Xi’an City	2992	7.05336	342532			11.75	2729	48	5420600	26591	189400
Baqiao District	2021	Xi’an City	2269	7.46231	357797			11.78	3106	35	6068500	28131	180200
Yanliang District	2012	Xi’an City	15792	5.14932	290460			17	19275	80.0033	1414900	13403	39400
Yanliang District	2013	Xi’an City	15696	5.4389	324413			19	21696	78.6671	1689600	15212	75000
Yanliang District	2014	Xi’an City	15632	5.18187	354330			19	24039	70.7716	1947200	17007	110600
Yanliang District	2015	Xi’an City	15478	5.69912	368854			19	25050	57.2749	1918500	18850	146200
Yanliang District	2016	Xi’an City	15457	5.61493	381618			17	25766	66.4086	1939400	20262	181800
Yanliang District	2017	Xi’an City	15285	5.54962	412635			16	27921	66.2383	2402100	21674	217400
Yanliang District	2018	Xi’an City	15136	7.94635	446310			13	28240	56.8658	2501000	23086	253000
Yanliang District	2019	Xi’an City	15178	7.57504	487524			11	30042	47.4934	2550600	24498	288600
Yanliang District	2020	Xi’an City	15220	7.20373	528738			9	31599	54	2491000	25910	324200
Yanliang District	2021	Xi’an City	15262	6.83242	569952			7	33156	43	2648400	27322	330800
Lintong District	2012	Xi’an City	46994	7.48342	468170			55.3638	39101	75.8739	2115300	10685	50000
Lintong District	2013	Xi’an City	46873	6.97222	515993			56.8816	39256	75.6795	2265800	12160	51800
Lintong District	2014	Xi’an City	46492	6.83709	538221			60.8868	39641	66.9187	2314500	13595	103500
Lintong District	2015	Xi’an City	46246	7.10626	551556			61.2966	39813	55.7569	1923400	15164	155200
Lintong District	2016	Xi’an City	45926	6.9001	569391			46.6695	39949	63.8301	1831100	16389	206900
Lintong District	2017	Xi’an City	45862	6.64548	588206			40.8257	40008	62.6268	2210100	17614	258600
Lintong District	2018	Xi’an City	45795	7.186	601608			40.4008	40674	53.1384	2375200	18839	310300
Lintong District	2019	Xi’an City	44147	7.53408	666124			42.2225	39222	43.65	2426900	20064	362000
Lintong District	2020	Xi’an City	42499	7.88216	730640			42.3218	46683	34.1616	2525300	21289	413700
Lintong District	2021	Xi’an City	40851	8.23023	795156			42.4211	54144	24.6732	2623700	22514	428900
Chang’an District	2012	Xi’an City	44219	8.34062	31	548	65234	42	30456	59.1709	3626400	11107	300600
Chang’an District	2013	Xi’an City	43579	8.20808	31	1077	65577	44	30124	58.0271	3691460	12695	317573
Chang’an District	2014	Xi’an City	41980	8.06098	40	1606	65920	43	29920	52.2756	4206958	14206	336650
Chang’an District	2015	Xi’an City	41428	8.34906	41.5	1794	61000	43	27318	45.9219	5126913	15486	365213
Chang’an District	2016	Xi’an City	39355	8.44658	43	2122	60486	44	21888	48.8199	6080200	16741	384713
Chang’an District	2017	Xi’an City	32215	8.23405	39	2122	60377	35	17602	49.5506	7910300	17996	339487
Chang’an District	2018	Xi’an City	31229	5.00311	24	242	60268	35	16026	42.3985	9091100	19251	268900
Chang’an District	2019	Xi’an City	31253	5.04009	27	291	60159	36	15572	35.2464	10012100	20506	287300
Chang’an District	2020	Xi’an City	31277	5.07708	197	931	60050	37	15118	28.0943	11362500	21761	327600
Chang’an District	2021	Xi’an City	31301	5.11406	367	933	59941	38	14664	20.9422	12694500	23016	342200
Lantian County	2012	Xi’an City	40400	7.17225	401514	14	25716	29	36350	45.6595	957300	7824	244500
Lantian County	2013	Xi’an City	39879	6.63507	436071	45	26133	30	36091	44.1644	1068900	8833	244555
Lantian County	2014	Xi’an City	39733	6.3071	462420	76	26550	31	47017	40.3143	1184500	9911	259058
Lantian County	2015	Xi’an City	39680	6.56305	465601	186	26560	31	46208	37.564	1130800	11084	260100
Lantian County	2016	Xi’an City	14993	17.056	492519	275	26750	34	46235	34.6323	1224400	12082	275900
Lantian County	2017	Xi’an City	39248	6.46785	539025	300	27485	25	46769	33.7864	1434900	13080	301500
Lantian County	2018	Xi’an City	39125	4.35407	494077	269	28220	25	46737	29.3827	1578300	14078	316600
Lantian County	2019	Xi’an City	38997	4.386	517089	3617	28955	25	45932	24.979	1492300	15076	283500
Lantian County	2020	Xi’an City	38869	4.41794	540101	242	29690	25	45668	20.5752	1429600	16074	323800
Lantian County	2021	Xi’an City	38741	4.44987	563113	800	30425	25	45404	16.1715	1517000	17072	330900
Zhouzhi County	2012	Xi’an City	33257	7.31148	412820	156	22747	42	46965	44.9028	782800	7733	253940
Zhouzhi County	2013	Xi’an City	33263	6.93563	460093	228	30340	43	46989	40.8695	876600	8870	263370
Zhouzhi County	2014	Xi’an City	33269	6.7617	482477	300	37933	45	33755	37.3729	972000	9961	276272
Zhouzhi County	2015	Xi’an City	32957	7.0308	508904	140	37723	48	48221	32.3165	1040600	11148	295400
Zhouzhi County	2016	Xi’an City	39473	5.63917	572627	144	42140	48	52778	32.7339	1149900	12207	331700
Zhouzhi County	2017	Xi’an City	32840	6.28977	591455	166	36173	33	52752	30.9729	1342600	13266	339100
Zhouzhi County	2018	Xi’an City	32723	3.63949	589596	194	30206	35	52774	27.3134	1462700	14325	329400
Zhouzhi County	2019	Xi’an City	32625	3.68448	646428	199	24239	34	52414	23.6539	1371500	15384	358800
Zhouzhi County	2020	Xi’an City	32527	3.72946	703260	482	18272	33	52412	19.9944	1394400	16443	403900
Zhouzhi County	2021	Xi’an City	32429	3.77445	760092	556	12305	32	52410	16.3349	1463900	17502	422400
Gaoling District	2012	Xi’an City	15244	13.1361	334939	1195	24226	26	106535	77.0687	2281600	10673	203300
Gaoling District	2013	Xi’an City	15197	13.042	399495	1474	24932	27	76274	79.4822	2799400	12167	221207
Gaoling District	2014	Xi’an City	15126	12.5859	468141	1753	25638	28	46013	69.8036	3000900	13615	259555
Gaoling District	2015	Xi’an City	15076	12.7857	495452	1354	27193	29	15752	53.7068	2914000	15191	276959
Gaoling District	2016	Xi’an City	37467	5.01185	555928	1854	26593	25	14005	64.4192	3002400	16431	285152
Gaoling District	2017	Xi’an City	14605	12.2711	607588	1855	26340	21	13885	64.9907	3771000	17671	326200
Gaoling District	2018	Xi’an City	14807	8.34457	482906	4800	26087	22	13297	54.5783	3784500	18911	249900
Gaoling District	2019	Xi’an City	14768	8.32381	528930	1874	25834	23	12802	44.1658	3744400	20151	271900
Gaoling District	2020	Xi’an City	14729	8.30305	574954	2808	25581	24	12307	33.7534	3744900	21391	308400
Gaoling District	2021	Xi’an City	14690	8.28229	620978	1525	25328	25	11812	23.3409	3847200	22631	318000
Huyi District	2012	Xi’an City	38160	8.22065	407108	1090	58650	43	43780	55.3865	1421300	9654	253700
Huyi District	2013	Xi’an City	38003	7.98358	447149	1179	58666	46	41416	54.102	1552400	10899	253187
Huyi District	2014	Xi’an City	37535	7.88616	481686	1268	58682	50	39052	47.577	1619600	12218	271973
Huyi District	2015	Xi’an City	37521	8.12726	496155	1289	55666	50	36688	42.9356	1508400	13616	275729
Huyi District	2016	Xi’an City	32881	9.05617	515503	1233	55728	21	34324	45.1355	1628200	14638	285963
Huyi District	2017	Xi’an City	35244	7.6325	496405	1290	54599	49	31960	44.8478	1974100	15660	277412
Huyi District	2018	Xi’an City	33685	5.67953	447692	1137	53470	50	31751	39.2082	2172600	16682	256500
Huyi District	2019	Xi’an City	33647	5.822	484760	1002	52341	50	30730	33.5685	1802300	17704	277100
Huyi District	2020	Xi’an City	33609	5.96448	521828	1940	51212	50	30690	27.9289	2336100	18726	311000
Huyi District	2021	Xi’an City	33571	6.10695	558896	1990	50083	50	30650	22.2893	2660500	19748	319800
Chencang District	2012	Baoji City	45170	5.32566	369445	1642	32626	35	31252	50.4775	1515400	8678	215351
Chencang District	2013	Baoji City	45084	5.1255	403722	1598	32713	37	31402	48.5361	1629100	9850	231175
Chencang District	2014	Baoji City	44968	4.99911	419956	1554	32800	41	30721	42.7662	1736400	11081	239216
Chencang District	2015	Baoji City	44983	5.18796	431498	1596	32900	43	31190	39.7566	1477200	9823	246346
Chencang District	2016	Baoji City	44600	5.08294	449627	1915	33000	38	31052	40.9402	1647800	10638	257312
Chencang District	2017	Baoji City	44450	5.0425	456435	968	34067	39	31731	37.7964	1913800	11453	260421
Chencang District	2018	Baoji City	44321	4.45103	400193	577	35134	41	32585	33.4607	2128441	12268	224288
Chencang District	2019	Baoji City	43576	4.65926	449269	600	36201	41	30394	29.1249	2144061	13083	252164
Chencang District	2020	Baoji City	42831	4.8675	498345	622	37268	41	28203	24.7891	2205587	13898	286668
Chencang District	2021	Baoji City	42086	5.07573	547421	655	38335	41	26012	20.4534	2413681	14713	295459
Mei County	2012	Baoji City	23157	5.79466	290770	577	8566	19	40480	58.4099	771900	8313	151823
Mei County	2013	Baoji City	23188	5.43514	331773	583	15440	20	41394	54.4136	905700	9527	180610
Mei County	2014	Baoji City	23161	5.44765	363300	589	22314	22	41974	49.3319	1046300	10755	203700
Mei County	2015	Baoji City	23236	5.30573	375668	590	25330	23	43974	44.9308	1069100	9590	204416
Mei County	2016	Baoji City	23175	5.07387	386713	612	25330	22	44025	45.6446	1155100	10386	209760
Mei County	2017	Baoji City	23173	5.00941	390844	616	25330	24	44096	43.2718	1289200	11182	211393
Mei County	2018	Baoji City	23171	3.12895	382767	236	25330	25	44556	38.8681	1369809	11978	223515
Mei County	2019	Baoji City	23121	3.16716	415091	238	25330	42	44641	34.4645	1612147	12774	239216
Mei County	2020	Baoji City	23071	3.20537	447415	288	25330	59	44726	30.0609	1770147	13570	281418
Mei County	2021	Baoji City	23021	3.24358	479739	371	25330	76	44811	25.6573	1997975	14366	316335
Fufeng County	2012	Baoji City	33199	8.44983	299723	29	20843	40	54736	66.6712	818500	7565	176378
Fufeng County	2013	Baoji City	32715	8.34632	329922	104	38521	42	52866	64.6021	951300	8647	185938
Fufeng County	2014	Baoji City	32395	8.19614	350702	179	56199	43	50924	58.4702	1005700	9736	197171
Fufeng County	2015	Baoji City	31802	8.83271	361807	170	42487	44	50504	52.9205	978700	8646	203762
Fufeng County	2016	Baoji City	31177	8.75498	374923	108	40333	36	49933	53.8735	1081600	9363	210596
Fufeng County	2017	Baoji City	30838	8.74126	383283	115	46400	42	48329	53.9076	1246500	10080	212756
Fufeng County	2018	Baoji City	30611	8.40714	361095	140	52467	44	48616	47.6428	1398717	10797	208194
Fufeng County	2019	Baoji City	30548	8.38575	379270	208	58534	35	48474	41.378	1471413	11514	216737
Fufeng County	2020	Baoji City	30485	8.36437	397445	362	64601	26	48332	35.1133	1545066	12231	245087
Fufeng County	2021	Baoji City	30422	8.34298	415620	291	70668	17	48190	28.8485	1735681	12948	264849
Fengxiang District	2012	Baoji City	46181	5.8554	338535	1438	42384	38	37833	52.4997	1430100	9159	209002
Fengxiang District	2013	Baoji City	46335	5.61234	371181	1438	43407	41	39781	49.7007	1619600	10423	221346
Fengxiang District	2014	Baoji City	46332	5.53296	398017	1438	44430	43	42299	45.8621	1818100	11716	241720
Fengxiang District	2015	Baoji City	45813	5.76336	406835	1238	43330	44	43274	41.2944	1877600	10375	242161
Fengxiang District	2016	Baoji City	45724	5.60841	421979	1162	39065	36	43220	41.7849	2020400	11225	250497
Fengxiang District	2017	Baoji City	45587	5.55312	432245	1154	39066	37	43400	39.0755	2088500	12075	253099
Fengxiang District	2018	Baoji City	45903	5.59475	402375	1330	39067	37	43089	34.5044	2167995	12925	230519
Fengxiang District	2019	Baoji City	45659	5.58503	438770	1072	39068	30	42975	29.9333	2236551	13775	250196
Fengxiang District	2020	Baoji City	45415	5.57531	475165	725	39069	25	42861	25.3622	2397666	14625	287006
Fengxiang District	2021	Baoji City	45171	5.56559	511560	664	39070	16	42747	20.7911	2642959	15475	296176
Qishan County	2012	Baoji City	35237	7.80711	323161	1597	42464	24	22623	60.5973	1340100	9153	205104
Qishan County	2013	Baoji City	35237	7.52221	351924	1597	42472	26	24680	57.5328	1440900	10435	224097
Qishan County	2014	Baoji City	35237	7.54272	375889	1597	42480	38	24571	52.5428	1491000	11791	225449
Qishan County	2015	Baoji City	35248	7.66137	384523	1567	42350	37	24990	48.1931	1438500	10483	229643
Qishan County	2016	Baoji City	35289	7.43314	396887	1413	42350	31	24652	47.7574	1561100	11343	237439
Qishan County	2017	Baoji City	35286	7.33007	408461	1413	42350	34	24404	47.0875	1886300	12203	243056
Qishan County	2018	Baoji City	35284	6.41214	390555	1124	42350	34	24214	41.1097	1930974	13063	220423
Qishan County	2019	Baoji City	35283	6.34368	422256	1192	42350	38	24667	35.132	1793382	13923	239779
Qishan County	2020	Baoji City	35282	6.27522	453957	1354	42350	42	25120	29.1542	1690945	14783	271348
Qishan County	2021	Baoji City	35281	6.20675	485658	1354	42350	46	25573	23.1764	1747059	15643	288859
Long County	2012	Baoji City	35436	3.12685	266633	109	20135	15	12711	39.2303	433000	6740	162519
Long County	2013	Baoji City	35479	2.84709	286761	115	20258	16	13277	40.0534	498800	7644	158051
Long County	2014	Baoji City	35442	2.82436	305299	121	20381	17	13492	34.0574	571600	8568	166059
Long County	2015	Baoji City	35413	2.97151	313671	99	15087	18	13609	31.1575	597800	7581	171335
Long County	2016	Baoji City	35368	2.92112	328986	138	16953	15	13493	34.2006	675500	8226	178828
Long County	2017	Baoji City	35360	2.82805	346775	154	15680	18	14488	28.6898	848200	8871	186579
Long County	2018	Baoji City	35341	2.93348	316174	78	14407	18	14520	26.1194	974213	9516	171201
Long County	2019	Baoji City	35322	2.95272	343972	198	13134	25	14189	23.5491	915529	10161	186364
Long County	2020	Baoji City	35303	2.97196	371770	198	11861	32	13858	20.9787	986618	10806	216450
Long County	2021	Baoji City	35284	2.99121	399568	198	10588	39	13527	18.4083	1088482	11451	234176
Qianyang County	2012	Baoji City	18574	3.29924	140736	529	6902	12	11709	48.2956	259400	7007	88356
Qianyang County	2013	Baoji City	18567	2.9651	154688	591	8467	14	12602	48.8389	310100	7938	95202
Qianyang County	2014	Baoji City	18552	3.03455	160611	653	10032	14	12955	42.9703	350600	8955	91816
Qianyang County	2015	Baoji City	18599	3.16727	168664	653	8980	15	12551	39.189	411100	7915	95697
Qianyang County	2016	Baoji City	18677	3.03619	181288	653	8980	11	12363	41.6361	486600	8572	103354
Qianyang County	2017	Baoji City	18637	2.95235	184024	663	9060	12	12325	37.4529	543400	9229	104669
Qianyang County	2018	Baoji City	18584	3.09164	164953	691	9140	12	11804	33.9423	597588	9886	91812
Qianyang County	2019	Baoji City	18186	3.14412	186395	249	9220	19	12448	30.4316	676914	10543	103453
Qianyang County	2020	Baoji City	17788	3.19661	207837	231	9300	26	13092	26.9209	738229	11200	119976
Qianyang County	2021	Baoji City	17390	3.24909	229279	237	9380	33	13736	23.4103	820052	11857	121233
Weibin District	2012	Baoji City	6504	4.07857	63308			8	7224	48.5683	4071600	10208
Weibin District	2013	Baoji City	6389	3.44342	69557			8	7378	44.9241	4272500	11596
Weibin District	2014	Baoji City	5969	3.35065	74374			8	7231	40.5049	4457000	13069
Weibin District	2015	Baoji City	5934	3.35288	77360			7	2072	37.6362	4699600	11587
Weibin District	2016	Baoji City	5565	2.85103	77834			6	5010	38.0124	5005000	12514
Weibin District	2017	Baoji City	5427	2.48977	80909			6	5149	35.1727	5311700	13441
Weibin District	2018	Baoji City	5104	2.30956	79619			6	4676	31.0109	5463000	14368
Weibin District	2019	Baoji City	5080	1.9935	86124			6	4217	26.849	5211400	15295
Weibin District	2020	Baoji City	5056	1.67745	92629			6	3758	22.6871	5353900	16222
Weibin District	2021	Baoji City	5032	1.36139	99134			6	3299	18.5252	5496400	17149	59429
Jintai District	2012	Baoji City	10748	3.42268	37857			13	6221	62.3551	2412500	9290	52777
Jintai District	2013	Baoji City	10613	3.21436	41236			14	6146	60.7564	2757300	10581	47890
Jintai District	2014	Baoji City	10176	3.24479	43570			14	5431	55.7033	2954500	11883	43003
Jintai District	2015	Baoji City	10122	3.64217	45197			14	5081	50.9274	3042300	10523	38116
Jintai District	2016	Baoji City	10199	3.48966	47906			12	4736	52.4752	3385000	11365	33229
Jintai District	2017	Baoji City	10127	3.45611	48336			13	4781	49.631	3578100	12207	28342
Jintai District	2018	Baoji City	10065	3.80219	43330			13	4489	44.5116	3706500	13049	23455
Jintai District	2019	Baoji City	9903	3.60456	46448			13	4489	39.3921	3649500	13891	25155
Jintai District	2020	Baoji City	9741	3.40694	49566			13	4489	34.2726	3625500	14733	28625
Jintai District	2021	Baoji City	9579	3.20932	52684			13	4489	29.1531	3601500	15575	29632
Jingyang County	2012	Xianyang City	44397	5.79478	632757	8814	52466	40	40253	71.027	1180200	8379	386382
Jingyang County	2013	Xianyang City	43757	5.54069	701427	9220	51088	46	38800	71.2608	1350100	9561	408695
Jingyang County	2014	Xianyang City	43100	5.56471	737796	9626	49710	47	36610	65.0668	1520300	10794	438354
Jingyang County	2015	Xianyang City	42459	5.82237	756662	9636	49812	49	34150	53.7453	1602300	10106	449989
Jingyang County	2016	Xianyang City	41995	5.73394	791330	6768	49667	36	34772	60.4671	1790400	10940	464240
Jingyang County	2017	Xianyang City	30607	5.33283	528502	2498	41867	39	25168	58.1753	759600	11774	312242
Jingyang County	2018	Xianyang City	30807	5.22657	476980	306	34067	37	22190	50.9796	754310	12608	280000
Jingyang County	2019	Xianyang City	30807	5.22797	507076	2394	26267	38	27248	43.7839	757300	13442	292650
Jingyang County	2020	Xianyang City	30807	5.22936	537172	2542	18467	39	32306	36.5882	808970	14276	331740
Jingyang County	2021	Xianyang City	30807	5.23076	567268	2585	10667	40	37364	29.3925	1167780	15110	405060
Sanyuan County	2012	Xianyang City	33208	6.2185	450714	864	36099	24	32220	73.7324	1204800	8383	261160
Sanyuan County	2013	Xianyang City	33129	6.03704	488895	884	38667	28	32300	74.9021	1408100	9607	274062
Sanyuan County	2014	Xianyang City	33055	5.90304	509048	904	41235	29	28160	69.3431	1601300	10846	291714
Sanyuan County	2015	Xianyang City	32980	6.09797	514073	1061	40023	31	29024	55.8947	1776300	10135	298715
Sanyuan County	2016	Xianyang City	32902	5.95739	530811	1063	40036	23	28268	63.2331	1935100	10961	306444
Sanyuan County	2017	Xianyang City	32836	5.93803	541711	1788	42958	25	29175	61.3254	2360900	11787	309069
Sanyuan County	2018	Xianyang City	32751	5.76825	473577	8243	45880	25	28542	52.9408	2397556	12613	265263
Sanyuan County	2019	Xianyang City	32730	5.75982	512923	5476	48802	25	29203	44.5563	2153480	13439	281000
Sanyuan County	2020	Xianyang City	32709	5.75139	552269	5633	51724	25	29864	36.1718	2077589	14265	330562
Sanyuan County	2021	Xianyang City	32688	5.74297	591615	5859	54646	25	30525	27.7873	2360850	15091	356900
Liquan County	2012	Xianyang City	30850	4.16483	665289	65	16572	32	92700	61.41	1086200	8381	426842
Liquan County	2013	Xianyang City	30033	4.09926	729211	76	16579	38	110800	61.0831	1278600	9571	464901
Liquan County	2014	Xianyang City	28865	4.1587	781606	184	16586	39	108311	57.9672	1450200	10796	501987
Liquan County	2015	Xianyang City	28876	4.33363	796999	204	16572	40	106940	49.7197	1518300	10089	507949
Liquan County	2016	Xianyang City	28874	4.20496	851118	210	16583	19	98691	51.2726	1641500	10922	540365
Liquan County	2017	Xianyang City	28866	4.16261	887487	238	16425	20	89582	48.7969	1741700	11755	546388
Liquan County	2018	Xianyang City	28841	4.01716	762998	290	16267	21	82455	42.274	1605154	12588	473923
Liquan County	2019	Xianyang City	28823	3.89557	812990	466	16109	21	83255	35.7511	1535000	13421	499000
Liquan County	2020	Xianyang City	28805	3.77398	862982	465	15951	21	84055	29.2282	1561800	14254	528900
Liquan County	2021	Xianyang City	28787	3.65238	912974	658	15793	21	84855	22.7054	1721301	15087	561663
Qindu District	2012	Xianyang City	10335	6.81064	238008			20	15140	79.3772	3300400	9355	143100
Qindu District	2013	Xianyang City	9962	6.30094	270448			22	14189	77.5848	3752900	10787	163000
Qindu District	2014	Xianyang City	8891	6.62715	285600			23	13447	69.702	4250100	12211	3217200
Qindu District	2015	Xianyang City	8524	7.04024	299386			24	13434	59.5084	4665400	11398	3287800
Qindu District	2016	Xianyang City	8524	6.58353	316937			19	13158	71.3608	5196000	12321	164200
Qindu District	2017	Xianyang City	3573	8.41198	131851			19	7863	71.186	4010000	13244	67000
Qindu District	2018	Xianyang City	3611	6.87732	130344			11	7483	60.2292	3828200	14167	65400
Qindu District	2019	Xianyang City	3555	6.96259	134540			11	6931	49.2724	3438500	15090	68600
Qindu District	2020	Xianyang City	3499	7.04786	138736			11	6379	38.3156	3619400	16013	75200
Qindu District	2021	Xianyang City	3443	7.13313	142932			11	5827	27.3588	3800300	16936	132800
Weicheng District	2012	Xianyang City	13124	8.19826	200596			19	10039	77.0604	2664400	9218	1213500
Weicheng District	2013	Xianyang City	12660	7.68065	223316			22	9615	76.3547	3052200	10582	1486200
Weicheng District	2014	Xianyang City	12421	7.48426	232705			23	8393	68.1906	3164300	11979	1758900
Weicheng District	2015	Xianyang City	12100	7.8443	240934			24	9187	54.7392	3130900	11183	2031600
Weicheng District	2016	Xianyang City	11964	7.43405	249961			14	8661	68.7921	3449000	12053	2304300
Weicheng District	2017	Xianyang City	11828	7.02381	258988			14	8135	67.706	3039200	12923	2577000
Weicheng District	2018	Xianyang City	11692	6.61356	268015			14	7609	56.8977	3787200	13793	2849700
Weicheng District	2019	Xianyang City	11556	6.20332	277042			14	7083	46.0894	2565900	14663	3122400
Weicheng District	2020	Xianyang City	11420	5.79307	286069			14	6557	35.2811	2745700	15533	3395100
Weicheng District	2021	Xianyang City	11284	5.38283	295096			14	6031	24.4728	2925500	16403	3667800
Qian County	2012	Xianyang City	51258	5.23233	426941	84	70400	32	274558	63.7676	1080900	8314	254753
Qian County	2013	Xianyang City	49915	5.07064	465953	84	64200	37	275625	61.8841	1272100	9495	278552
Qian County	2014	Xianyang City	48443	5.51322	513509	84	58000	38	90307	58.7462	1450400	10700	296239
Qian County	2015	Xianyang City	46630	5.63794	535346	94	58036	39	91008	50.231	1507400	10007	304620
Qian County	2016	Xianyang City	46642	5.48679	556117	113	60666	29	91502	50.7749	1623800	10773	316721
Qian County	2017	Xianyang City	46959	5.35823	564452	124	59203	29	112176	51.799	1789400	11539	321138
Qian County	2018	Xianyang City	46917	5.42405	504717	271	57740	29	111760	44.2338	1736460	12305	287060
Qian County	2019	Xianyang City	47064	5.30582	525600	95	56277	30	111663	36.6686	1716220	13071	302180
Qian County	2020	Xianyang City	47211	5.18759	546483	103	54814	31	111566	29.1035	1556210	13837	352730
Qian County	2021	Xianyang City	47358	5.06936	567366	126	53351	32	111469	21.5383	1758100	14603	389300
Wugong County	2012	Xianyang City	26528	7.93735	293249	454	37095	24	29694	78.7619	741400	8167	185150
Wugong County	2013	Xianyang City	26767	7.47189	323023	446	38180	30	28548	75.5878	959400	9335	187882
Wugong County	2014	Xianyang City	26906	7.33004	348078	438	39265	32	26703	68.6233	1100400	10521	202671
Wugong County	2015	Xianyang City	26937	7.54145	362655	436	39607	34	26663	62.3925	1124500	9857	209891
Wugong County	2016	Xianyang City	26955	7.34569	385201	437	39935	26	26647	65.4754	1232500	10660	223719
Wugong County	2017	Xianyang City	26967	7.20106	407256	438	39952	27	26629	68.4718	1409000	11463	235259
Wugong County	2018	Xianyang City	26978	7.22051	361151	653	39969	28	26615	59.5723	1412380	12266	214100
Wugong County	2019	Xianyang City	27590	7.17104	391253	268	39986	16	26625	50.6728	1531550	13069	232470
Wugong County	2020	Xianyang City	28202	7.12157	421355	310	40003	4	26635	41.7733	1545850	13872	256230
Wugong County	2021	Xianyang City	28814	7.07209	451457	585	40020	4	26645	32.8738	1713500	14675	275470
Xingping City	2012	Xianyang City	35810	6.22611	325470	1914	37358	28	16768	80.5252	1452000	8437	209999
Xingping City	2013	Xianyang City	34875	6.36568	362534	1889	37670	31	16923	78.5811	1752200	9677	227404
Xingping City	2014	Xianyang City	33924	6.3965	384997	1864	37982	32	16927	71.4563	1827700	10936	243411
Xingping City	2015	Xianyang City	32687	6.85321	388869	2106	37982	33	16927	63.2793	1916993	10232	249283
Xingping City	2016	Xianyang City	31490	6.9275	415054	2118	38014	23	16874	70.8962	2176700	11067	260376
Xingping City	2017	Xianyang City	28145	6.91672	394385	2119	35176	23	15058	72.8757	2411100	11902	249261
Xingping City	2018	Xianyang City	28031	6.65934	326852	1968	32338	20	14156	61.1847	2483302	12737	216675
Xingping City	2019	Xianyang City	27957	6.77583	364691	1763	29500	30	15503	49.4938	2416440	13572	235461
Xingping City	2020	Xianyang City	27883	6.89233	402530	1883	26662	40	16850	37.8028	2421100	14407	263010
Xingping City	2021	Xianyang City	27809	7.00882	440369	2027	23824	50	18197	26.1119	2809539	15242	342639
Tongguan County	2012	Weinan City	10654	4.36277	52526	137	3326	9	10715	60.0265	328000	6388	29940
Tongguan County	2013	Weinan City	10720	4.02052	60204	171	5943	10	11839	59.1874	387500	7391	34270
Tongguan County	2014	Weinan City	10661	3.84664	64299	205	8560	10	11506	52.2246	411000	8381	34240
Tongguan County	2015	Weinan City	10593	4.28009	66261	194	8208	11	11621	44.8386	365500	8368	35190
Tongguan County	2016	Weinan City	10660	4.13124	69086	216	14600	10	11619	42.7405	369000	9063	36572
Tongguan County	2017	Weinan City	10703	4.11623	71616	214	13333	13	10601	41.3614	457700	9758	37916
Tongguan County	2018	Weinan City	10720	4.1347	87342	110	12066	13	9632	37.2149	403487	10453	48440
Tongguan County	2019	Weinan City	10710	3.95546	96342	45	10799	8	9374	33.0685	441972	11148	53986
Tongguan County	2020	Weinan City	10700	3.77622	105342	45	9532	3	9116	28.922	440851	11843	63172
Tongguan County	2021	Weinan City	10690	3.59698	114342	49	8265	4	8858	24.7756	473732	12538	68392
Huazhou District	2012	Weinan City	23958	4.99048	138149	2757	14200	27	26827	44.6467	1106900	6505	79438
Huazhou District	2013	Weinan City	23922	4.69442	155283	2783	21800	30	26879	41.1313	1144300	7487	87358
Huazhou District	2014	Weinan City	23922	4.60254	166851	2809	29400	33	26931	37.4618	1157500	8438	93970
Huazhou District	2015	Weinan City	23952	4.91145	171806	2809	29400	35	26983	34.6533	1080300	8430	96415
Huazhou District	2016	Weinan City	23746	4.82502	179231	2802	29400	33	27035	32.1911	882200	9088	100535
Huazhou District	2017	Weinan City	23632	4.82431	184469	2824	27333	30	27001	30.5686	949800	9746	103510
Huazhou District	2018	Weinan City	23590	5.79483	227018	2826	25266	31	26968	27.8695	756097	10404	134720
Huazhou District	2019	Weinan City	23608	5.91901	251489	2843	23199	31	26965	25.1704	993373	11062	148893
Huazhou District	2020	Weinan City	23626	6.04319	275960	2844	21132	31	26939	22.4713	965843	11720	171130
Huazhou District	2021	Weinan City	23644	6.16737	300431	2844	19065	31	26913	19.7722	1119800	12378	181100
Huayin City	2012	Weinan City	12758	6.3082	85727	187	14637	6	5380	57.6739	676300	6402	50360
Huayin City	2013	Weinan City	12727	6.13656	97577	186	14582	6	5376	54.4741	740600	7325	52542
Huayin City	2014	Weinan City	12703	5.90412	104549	185	14527	7	7588	49.632	783500	8241	56300
Huayin City	2015	Weinan City	12580	6.53227	107973	173	13133	7	7668	43.1476	804200	8236	56300
Huayin City	2016	Weinan City	12557	6.25301	113091	192	13100	7	7698	44.1031	700200	8862	60484
Huayin City	2017	Weinan City	12567	6.3662	116610	200	13134	8	7699	42.313	849600	9488	62375
Huayin City	2018	Weinan City	12569	8.74079	150071	1579	13168	9	7698	37.082	911614	10114	85258
Huayin City	2019	Weinan City	12567	8.62091	164867	1532	13202	9	7696	31.851	707898	10740	92518
Huayin City	2020	Weinan City	12565	8.50103	179663	1532	13236	9	7756	26.6201	724847	11366	104781
Huayin City	2021	Weinan City	12563	8.38115	194459	409	13270	9	7816	21.3891	776000	11992	114600
Linwei District	2012	Weinan City	69495	5.28875	527055			76	58223	75.8198	2625200	6887	125100000
Linwei District	2013	Weinan City	69522	4.85715	590453			75	58292	73.1832	2737400	7870	107300000
Linwei District	2014	Weinan City	65963	5.04956	630349			81	67203	65.1616	3037900	8940	89467900
Linwei District	2015	Weinan City	65683	5.3206	653461			95	69224	55.9551	3068100	9045	71676400
Linwei District	2016	Weinan City	63547	5.38238	687069			88	66943	62.0955	3326700	9805	53884900
Linwei District	2017	Weinan City	61591	5.55781	704352			101	67834	59.728	3705200	10565	36093400
Linwei District	2018	Weinan City	59444	6.12319	846456			114	68075	52.3078	4196400	11325	18301900
Linwei District	2019	Weinan City	52668	5.64747	850412			91	61961	44.8875	4276100	12085	510400
Linwei District	2020	Weinan City	45892	5.17175	854368			68	70622	37.4673	4418900	12845	544300
Linwei District	2021	Weinan City	39116	4.69603	858324			45	79283	30.047	4561700	13605	589000
Dali County	2012	Weinan City	76399	3.79784	483972	197960	35970	89	71094	81.4532	1005800	7051	266338
Dali County	2013	Weinan City	75705	3.67347	543715	101840	58160	101	74135	77.8019	1098400	8070	287831
Dali County	2014	Weinan City	74380	3.6372	584115	5720	80350	103	82593	69.5218	1123700	9184	311324
Dali County	2015	Weinan City	74031	3.82433	597803	5820	80350	110	87380	57.6022	1047300	9306	319635
Dali County	2016	Weinan City	70692	3.89785	630040	5930	85470	103	92142	62.356	1159500	10106	337452
Dali County	2017	Weinan City	67571	4.12439	648934	17781	85463	114	86202	61.8165	1620400	10906	623800
Dali County	2018	Weinan City	66876	4.43788	772302	21762	85456	120	83273	54.65	1505775	11706	428663
Dali County	2019	Weinan City	64259	4.77458	859041	24077	85449	116	80019	47.4836	1685611	12506	476872
Dali County	2020	Weinan City	61642	5.11128	945780	24600	85442	112	77814	40.3171	1755100	13306	557100
Dali County	2021	Weinan City	59025	5.44798	1032519	25595	85435	108	75609	33.1507	1924624	14106	596518
Pucheng County	2012	Weinan City	97855	3.68153	363911	9070	77465	63	62180	73.8346	1300100	6603	213420
Pucheng County	2013	Weinan City	94933	3.47716	411106	10076	77570	66	62545	71.7322	1418700	7615	222161
Pucheng County	2014	Weinan City	93352	3.48506	440782	11082	77675	94	67727	64.9527	1516200	8590	236160
Pucheng County	2015	Weinan City	91033	3.86853	455728	11887	77700	96	66763	55.1932	1551600	8557	243668
Pucheng County	2016	Weinan City	88093	3.88443	479333	12548	77700	94	66327	56.7033	1631300	9250	254570
Pucheng County	2017	Weinan City	88571	3.89952	493902	11572	77712	100	65320	55.0186	1815300	9943	266933
Pucheng County	2018	Weinan City	88906	4.24998	590033	11900	77724	102	65484	50.7137	1906335	10636	333298
Pucheng County	2019	Weinan City	88717	4.23555	638098	12951	77736	37	60259	46.4087	1941567	11329	360473
Pucheng County	2020	Weinan City	88528	4.22111	686163	14002	77748	28	59838	42.1038	2035357	12022	418196
Pucheng County	2021	Weinan City	88339	4.20667	734228	14183	77760	93	59417	37.7988	2259974	12715	462261
Fuping County	2012	Weinan City	70987	5.35383	397056	400	60334	53	224494	69.106	1001000	6551	230181
Fuping County	2013	Weinan City	71002	5.07036	445089	414	70667	58	234753	69.9168	1201200	7514	246525
Fuping County	2014	Weinan City	70814	5.01319	477479	2376	81000	61	264735	63.4942	1355100	8476	263250
Fuping County	2015	Weinan City	70171	5.28218	494383	2313	90000	73	282832	53.9269	1303500	8515	271000
Fuping County	2016	Weinan City	68101	5.28923	520442	2516	78312	61	300944	56.4493	1373000	9171	284427
Fuping County	2017	Weinan City	66601	5.41079	532776	5126	82000	62	301907	53.9935	1444800	9827	290307
Fuping County	2018	Weinan City	66597	5.67423	668497	570	85688	66	302084	48.1758	1659967	10483	382145
Fuping County	2019	Weinan City	66330	5.73353	741886	5420	89376	78	57454	42.3581	1839644	11139	422153
Fuping County	2020	Weinan City	66063	5.79282	815275	5127	93064	90	57440	36.5404	1930770	11795	480318
Fuping County	2021	Weinan City	65796	5.85212	888664	4615	96752	102	57426	30.7226	2146643	12451	511654
Shenmu City	2012	Yulin City	45155	2.74572	205324	804		29	9020	27.5685	10038900	12537	106316
Shenmu City	2013	Yulin City	48474	2.56057	214584	1567		29	8786	28.6839	9255400	13225	114564
Shenmu City	2014	Yulin City	81855	1.49975	215555	1587		40	8552	23.9101	9682400	13622	119740
[truncated: 676 more rows]

## Sheet: Score of Xi’an City
County/District	Year	City	C11（Common cultivated land area）	C12（Grain output per unit area）	C13（Gross output value of agriculture, forestry, animal husbandry and fishery）	b21（Area occupied by facility agriculture）	b22（Machine harvesting area）	b23（Total power of agricultural machinery）	b31（Amount of Agricultural Chemical Fertilizer Applied (Pure Equivalent)）	b32（pm2.5）	b41(Gross Regional Product)	b42（Per capital disposable income of rural residents）	b43（Value added of primary industry）	Standardization	C11（Common cultivated land area）	C12（Grain output per unit area）	C13（Gross output value of agriculture, forestry, animal husbandry and fishery）	b21（Area occupied by facility agriculture）	b22（Machine harvesting area）	b23（Total power of agricultural machinery）	b31（Amount of Agricultural Chemical Fertilizer Applied (Pure Equivalent)）	b32（pm2.5）	b41(Gross Regional Product)	b42（Per capital disposable income of rural residents）	b43（Value added of primary industry）	pij	C11（Common cultivated land area）	C12（Grain output per unit area）	C13（Gross output value of agriculture, forestry, animal husbandry and fishery）	b21（Area occupied by facility agriculture）	b22（Machine harvesting area）	b23（Total power of agricultural machinery）	b31（Amount of Agricultural Chemical Fertilizer Applied (Pure Equivalent)）	b32（pm2.5）	b41(Gross Regional Product)	b42（Per capital disposable income of rural residents）	b43（Value added of primary industry）	pij*ln(pij)	C11（Common cultivated land area）	C12（Grain output per unit area）	C13（Gross output value of agriculture, forestry, animal husbandry and fishery）	b21（Area occupied by facility agriculture）	b22（Machine harvesting area）	b23（Total power of agricultural machinery）	b31（Amount of Agricultural Chemical Fertilizer Applied (Pure Equivalent)）	b32（pm2.5）	b41(Gross Regional Product)	b42（Per capital disposable income of rural residents）	b43（Value added of primary industry）
[truncated: 80 more rows]
[truncated: 52 more columns]

[truncated: 15 more sheets: Score of Baoji City, Score of Xianyang City, Score of Weinan City, Score of Yulin City, Score of Yan'an City, Score of Tongchuan City, Score of Weinan City1, Score of Xianyang City1, Score of Baoji City1, Score of Hanzhong City1, Score of Ankang City1, Score of Shangluo City1, Comprehensive Scores,  Scatter Plot Data, Sheet2]
