# Supplementary material
Source: Research Square preprint supplement (doi:10.21203/rs.3.rs-8699542/v1)
Supplement: Supplementary file 2 [file 4bd047b911e28ec0e267d9fd.xlsx]

## Sheet: Sheet1
Year	County/District	Comprehensive Score	Median Comprehensive Score	（X1）Average annual temperature（℃）	X2Average annual precipitation	X3Total population at the end of the year(10,000 people)	X4Local budget expenditures(10,000 yuan)	X5Population productivity (million yuan/person)	X6Effective irrigated area(ha)	X7Regional economic density(million yuan/square kilometer)	Average annual precipitation	C11（Common cultivated land area）	Cultivated land area per capital (ha/million people)	Irrigation Ratio
2012	Baqiao District	0.214798	0.0185245	13.0109	0.00192617	52.4	169283	4.4523	26267	7189.52	1.92617	10511	200.592	2.499
2013	Baqiao District	0.320235	0.0538435	14.6867	0.00159294	53.21	190742	5.56451	24548.8	8290.6	1.59294	9840	184.928	2.49479
2014	Baqiao District	0.350186	0.0979433	13.8822	0.00214772	53.6	220305	5.47215	24385.5	9038.52	2.14772	9241	172.407	2.63884
2015	Baqiao District	0.406207	0.118376	13.9703	0.00190118	53.89	295407	6.16589	24675.2	10239.8	1.90118	8709	161.607	2.8333
2016	Baqiao District	0.441865	0.103446	14.4933	0.0016231	54.68	272233	6.319	2454.65	10162.7	1.6231	5242	95.8669	0.468265
2017	Baqiao District	0.558448	0.132275	14.1027	0.00199597	64.06	293695	6.6867	14740.5	13200.3	1.99597	4840	75.5542	3.04556
2018	Baqiao District	0.44855	0.110339	13.8741	0.00177212	67.73	330784	7.98479	27026.4	14816	1.77212	4438	65.5249	6.08977
2019	Baqiao District	0.497795	0.12743	13.8814	0.00219054	70.39	355428	6.94979	39312.3	15075.2	2.19054	3715	52.7774	10.582
2020	Baqiao District	0.533937	0.136869	13.4952	0.00222255	102.1	371532	5.39187	4265.59	16704.5	2.22255	2992	29.3046	1.42566
2021	Baqiao District	0.580216	0.15096	13.7356	0.00301402	133.81	387636	3.83396	41293.3	18701.1	3.01402	2269	16.9569	18.1989
2012	Yanliang District	0.232076	0.0510462	14.8082	0.00125451	25.68	139962	5.59735	6243.74	5785.73	1.25451	15792	614.953	0.395374
2013	Yanliang District	0.321503	0.0611541	16.6441	0.00103206	26.01	166351	6.49596	5542.88	6909.02	1.03206	15696	603.46	0.353139
2014	Yanliang District	0.39127	0.0999881	15.7115	0.00149549	26.26	186987	7.4158	5367.94	7962.38	1.49549	15632	595.278	0.343394
2015	Yanliang District	0.476715	0.130272	15.8646	0.00110815	26.27	220632	7.33723	5187.23	7845.02	1.10815	15478	589.189	0.335135
2016	Yanliang District	0.459107	0.101983	16.4675	0.000982144	26.49	230682	7.32125	324.263	7930.48	0.982144	15457	583.503	0.0209784
2017	Yanliang District	0.501461	0.0909126	15.9139	0.00160038	29.47	239536	8.15112	1773.84	9822.53	1.60038	15285	518.663	0.116051
2018	Yanliang District	0.591791	0.0883864	15.9325	0.0010479	30.12	217355	8.33453	3223.42	10226.9	1.0479	15136	502.523	0.212964
2019	Yanliang District	0.625874	0.0966449	15.7446	0.00142616	30.45	224871	8.37635	4673	10429.8	1.42616	15178	498.456	0.30788
2020	Yanliang District	0.605235	0.0815622	15.3432	0.00156114	30.3	209809	8.22112	3851.86	10186.1	1.56114	15220	502.31	0.253079
2021	Yanliang District	0.6381	0.0928225	15.6253	0.00213098	30.15	194747	8.06589	2993.32	10829.7	2.13098	15262	506.202	0.196129
2012	Lintong District	0.285268	0.0477556	13.943	0.00148706	70.59	242058	2.99668	335.272	2309.36	1.48706	46994	665.732	0.00713437
2013	Lintong District	0.322041	0.0521745	15.7913	0.00125505	71.39	272237	3.17383	244.472	2473.66	1.25505	46873	656.577	0.00521563
2014	Lintong District	0.426894	0.0845583	14.9153	0.00174768	71.85	293966	3.22129	252.133	2526.83	1.74768	46492	647.07	0.00542315
2015	Lintong District	0.476548	0.102886	14.9601	0.00140404	71.11	392195	2.74824	258.498	2099.85	1.40404	46246	650.345	0.00558962
2016	Lintong District	0.313258	0.0734071	15.5131	0.00123372	71.55	384236	2.55919	265.274	1999.08	1.23372	45926	641.873	0.00577612
2017	Lintong District	0.311956	0.0535639	15.0499	0.00181409	68.99	406723	3.23578	358.821	2412.85	1.81409	45862	664.763	0.00782394
2018	Lintong District	0.397851	0.0744326	15.0177	0.00133687	69.69	436318	3.48236	452.369	2593.1	1.33687	45795	657.124	0.00987813
2019	Lintong District	0.497249	0.0944589	14.8678	0.00175636	70.04	458230	3.4652	545.917	2649.54	1.75636	44147	630.311	0.0123659
2020	Lintong District	0.554005	0.100687	14.4439	0.00170752	67.6	465366	3.73566	558.726	2756.97	1.70752	42499	628.683	0.0131468
2021	Lintong District	0.597727	0.106916	14.6789	0.00250787	65.16	472502	4.00612	572.543	2864.4	2.50787	40851	626.934	0.0140154
2012	Chang’an District	0.309897	0.0787523	11.0347	0.00300174	102	365362	3.55529	872.269	2295.19	3.00174	44219	433.52	0.0197261
2013	Chang’an District	0.370215	0.0909181	12.599	0.00275767	104	447600	3.54949	78.7346	2324.6	2.75767	43579	419.029	0.00180671
2014	Chang’an District	0.434866	0.104311	11.7326	0.00301236	106	497307	3.96883	68.1847	2649.22	3.01236	41980	396.038	0.00162422
2015	Chang’an District	0.440786	0.111037	11.9838	0.00300526	106.53	534331	4.81265	496.149	3228.53	3.00526	41428	388.886	0.0119762
2016	Chang’an District	0.50028	0.115824	12.2473	0.00274974	108.3	612604	5.61422	246.934	3828.84	2.74974	39355	363.389	0.00627452
2017	Chang’an District	0.433415	0.112374	12.0376	0.00298489	100.97	530795	7.83437	209.067	4981.3	2.98489	32215	319.055	0.00648975
2018	Chang’an District	0.336587	0.0749407	11.6014	0.00301288	104.28	569454	8.71798	171.201	5724.87	3.01288	31229	299.473	0.00548211
2019	Chang’an District	0.416562	0.0955261	11.8426	0.00325898	106.42	504679	9.49	133.334	6304.85	3.25898	31253	293.676	0.00426629
2020	Chang’an District	0.555117	0.133776	11.4573	0.00334963	158.6	493600	7.16425	117.152	7155.23	3.34963	31277	197.207	0.00374563
2021	Chang’an District	0.664361	0.167606	11.8708	0.00453012	210.78	482521	4.8385	1.26135	7988.99	4.53012	31301	148.501	4.02974e-05
2012	Lantian County	0.166477	0.0261652	10.5008	0.0025264	65	169720	1.47277	164493	486.186	2.5264	40400	621.538	4.07162
2013	Lantian County	0.193249	0.0289017	12.1283	0.00203328	65	234900	1.64446	144221	542.864	2.03328	39879	613.523	3.61646
2014	Lantian County	0.127066	0.0307501	11.3581	0.00265021	66	251369	1.7947	123948	590.479	2.65021	39733	602.015	3.11952
2015	Lantian County	0.165248	0.0416335	11.4636	0.00257095	65	301002	1.73969	103675	563.709	2.57095	39680	610.462	2.61278
2016	Lantian County	0.268741	0.0735704	11.7601	0.00221773	65.53	356183	1.86846	83402.4	610.369	2.21773	14993	228.796	5.56275
2017	Lantian County	0.242394	0.0476989	11.5847	0.00267765	53.26	357590	2.69414	63129.6	715.304	2.67765	39248	736.913	1.60848
2018	Lantian County	0.277026	0.0483185	11.2888	0.00244346	53.68	387317	2.94212	42856.9	786.79	2.44346	39125	728.856	1.09538
2019	Lantian County	0.320958	0.0708715	11.4123	0.00272959	53.61	427514	2.78362	22584.1	743.937	2.72959	38997	727.42	0.579125
2020	Lantian County	0.359312	0.073299	11.165	0.00280175	49.2	444300	2.95692	2311.38	712.68	2.80175	38869	790.02	0.0594659
2021	Lantian County	0.411712	0.0843507	11.4453	0.00388835	44.79	634387	3.13021	2359.75	756.25	3.88835	38741	864.948	0.0609109
2012	Zhouzhi County	0.186673	0.0356941	9.7847	0.00346537	67	252265	1.16836	10279.6	265.446	3.46537	33257	496.373	0.309097
2013	Zhouzhi County	0.257043	0.0517032	11.3538	0.00333917	68	248600	1.28912	9015.75	297.253	3.33917	33263	489.162	0.271044
2014	Zhouzhi County	0.413785	0.0990692	10.4675	0.00342017	69	284284	1.48696	7751.87	327.383	3.42017	33269	482.159	0.233006
2015	Zhouzhi County	0.395752	0.0918113	10.8985	0.00310335	68	341695	1.53294	6487.99	350.488	3.10335	32957	484.662	0.196862
2016	Zhouzhi County	0.497183	0.119148	11.003	0.00290529	68.94	380428	1.66797	5224.11	387.302	2.90529	39473	572.57	0.132346
2017	Zhouzhi County	0.452151	0.0727712	10.8232	0.00330402	58.94	398852	2.278	3960.23	452.206	3.30402	32840	557.177	0.120592
2018	Zhouzhi County	0.415334	0.0488479	10.279	0.00355655	59.41	458309	2.46243	2696.35	492.657	3.55655	32723	550.8	0.0823993
2019	Zhouzhi County	0.462874	0.0515411	10.5203	0.00370936	59.29	424000	2.31326	1432.47	465.673	3.70936	32625	550.261	0.0439073
2020	Zhouzhi County	0.559059	0.0634855	10.1866	0.00366098	55.7	428194	2.53411	168.595	473.448	3.66098	32527	583.968	0.00518323
2021	Zhouzhi County	0.620769	0.0687975	10.7394	0.0044697	52.11	435722	2.75496	1765.47	497.046	4.4697	32429	622.318	0.0544411
2012	Gaoling District	0.0762952	0.0145186	14.8911	0.00128075	31	162754	7.36	12549.9	7760.54	1.28075	15244	491.742	0.823267
2013	Gaoling District	0.188469	0.0417041	16.8518	0.00105553	32	184100	8.74813	12748.2	9521.77	1.05553	15197	474.906	0.838861
2014	Gaoling District	0.356537	0.0777176	15.9151	0.00150445	33	202716	9.93636	12946.5	10207.1	1.50445	15126	458.364	0.855908
2015	Gaoling District	0.52412	0.133557	15.9507	0.00120492	33	255373	8.83333	13144.8	9911.56	1.20492	15076	456.848	0.871899
2016	Gaoling District	0.521244	0.118695	16.5735	0.00106617	33.22	232310	9.37929	13343	10212.2	1.06617	37467	1127.84	0.356128
2017	Gaoling District	0.583885	0.104729	16.0439	0.00165236	35.7	253141	1.56325	13541.3	12826.5	1.65236	14605	409.104	0.927171
2018	Gaoling District	0.570001	0.134907	16.0645	0.00114133	36.26	340275	1.43713	13739.6	12872.4	1.14133	14807	408.356	0.927914
2019	Gaoling District	0.633406	0.144152	15.8387	0.00157977	36.71	356266	1.19995	13937.9	12736.1	1.57977	14768	402.288	0.943792
2020	Gaoling District	0.7518	0.171784	15.2236	0.00154637	44.2	280141	8.47262	14136.2	12737.8	1.54637	14729	333.235	0.959754
2021	Gaoling District	0.824991	0.188855	15.4665	0.002271	51.69	204016	15.7453	14485.9	13085.7	2.271	14690	284.194	0.986103
2012	Huyi District	0.180652	0.0231992	11.1247	0.00324075	60	213234	2.36883	27915.4	1108.66	3.24075	38160	636	0.731534
2013	Huyi District	0.241046	0.0404991	12.6897	0.00321217	61	236100	2.54492	2643.59	1210.92	3.21217	38003	623	0.0695626
2014	Huyi District	0.375202	0.0960401	11.7542	0.00326156	61	269178	2.65582	276.423	1263.34	3.26156	37535	615.328	0.00736442
2015	Huyi District	0.44566	0.132011	12.0849	0.0031336	61	338906	2.47279	27544.9	1179.36	3.1336	37521	615.098	0.734119
2016	Huyi District	0.459458	0.12799	12.3288	0.0029919	61.22	402850	2.65959	287.987	1273.03	2.9919	32881	537.096	0.00875846
2017	Huyi District	0.502886	0.130553	12.1016	0.00326143	54.93	407011	3.59385	18702.4	1382.42	3.26143	35244	641.617	0.530655
2018	Huyi District	0.438921	0.110716	11.563	0.00344784	55.86	430239	3.88937	37116.9	1740.87	3.44784	33685	603.025	1.10188
2019	Huyi District	0.520301	0.126023	11.8835	0.00350026	56.46	358400	3.19217	55531.3	1444.15	3.50026	33647	595.944	1.65041
2020	Huyi District	0.723008	0.160544	11.5035	0.00360737	57.7	387000	4.48717	54712.6	1871.88	3.60737	33609	582.478	1.62792
2021	Huyi District	0.832181	0.183864	11.9951	0.00458257	58.94	415600	5.78217	53891.6	2131.81	4.58257	33571	569.579	1.6053
2012	Chencang District	0.129187	0.0243683	9.88722	0.00250735	60	148600	2.52567	6799.6	613.026	2.50735	45170	752.833	0.150533
2013	Chencang District	0.217205	0.0537437	11.6679	0.00230089	61	175936	2.67656	6238.37	659.021	2.30089	45084	739.082	0.138372
2014	Chencang District	0.343464	0.0779747	10.8671	0.00239424	60.46	183899	2.87198	6263.88	702.427	2.39424	44968	743.764	0.139296
2015	Chencang District	0.315609	0.0828327	11.187	0.00228854	60	234520	2.462	6277.83	597.573	2.28854	44983	749.717	0.13956
2016	Chencang District	0.36131	0.0836675	11.554	0.00195802	60.7	208099	2.71466	15769.2	666.586	1.95802	44600	734.761	0.35357
2017	Chencang District	0.426023	0.086145	11.2192	0.00240711	60.5	181800	3.16336	13320.7	788.546	2.40711	44450	734.711	0.299678
2018	Chencang District	0.39627	0.0815587	10.764	0.00244382	60.39	204100	3.52449	10872.1	876.984	2.44382	44321	733.913	0.245304
2019	Chencang District	0.571283	0.125366	10.7872	0.00271608	60.25	235300	3.55867	8423.57	883.42	2.71608	43576	723.253	0.193308
2020	Chencang District	0.763197	0.169163	10.5352	0.00321644	47.92	256600	4.62644	8488.99	908.771	3.21644	42831	893.802	0.198197
2021	Chencang District	0.928933	0.213066	10.92	0.00319631	35.59	268500	5.69421	8528.38	994.512	3.19631	42086	1182.52	0.202642
2012	Mei County	0.257941	0.0508306	10.319	0.0036654	32	141403	2.41219	1721.29	894.438	3.6654	23157	723.656	0.0743315
2013	Mei County	0.354144	0.0801822	11.8603	0.00347558	33	149695	2.74455	156.237	1056.83	3.47558	23188	702.667	0.00673782
2014	Mei County	0.459095	0.115766	11.0266	0.00348953	33	164704	3.17667	15543.7	1220.89	3.48953	23161	701.848	0.671117
2015	Mei County	0.414973	0.098499	11.392	0.00313553	33	179783	3.2397	15624.2	1246.04	3.13553	23236	704.121	0.672413
2016	Mei County	0.432745	0.107554	11.6744	0.00287616	32.83	190612	3.51843	13839.6	1346.27	2.87616	23175	705.909	0.597178
2017	Mei County	0.481326	0.107319	11.3509	0.00314599	30.5	196631	4.22689	15623.8	1502.56	3.14599	23173	759.77	0.674226
2018	Mei County	0.421539	0.0544973	10.8787	0.00380421	30.43	209778	4.51584	17408.1	1596.51	3.80421	23171	761.453	0.751288
2019	Mei County	0.513339	0.0680802	11.0435	0.00395849	30.36	212092	5.31122	19192.3	1878.96	3.95849	23121	761.561	0.830083
2020	Mei County	0.624332	0.0830616	10.8999	0.0038222	28.12	218675	6.29498	1937.39	2063.11	3.8222	23071	820.448	0.083975
2021	Mei County	0.737367	0.0990047	11.3043	0.00429361	25.88	225258	7.27873	19489.9	2328.64	4.29361	23021	889.529	0.846613
2012	Fufeng County	0.100383	0.00964451	12.268	0.0018477	44	153399	1.86227	182.449	1160.99	1.8477	33199	754.523	0.0054956
2013	Fufeng County	0.216794	0.0536657	13.8692	0.00170869	45	162189	2.114	1637.33	1349.36	1.70869	32715	727	0.0500482
2014	Fufeng County	0.349602	0.0827873	13.0489	0.00213601	45	176399	2.23489	16454	1426.52	2.13601	32395	719.889	0.507917
2015	Fufeng County	0.401086	0.102297	13.1552	0.00191132	45	201819	2.17489	16523.2	1388.23	1.91132	31802	706.711	0.519566
2016	Fufeng County	0.42346	0.117727	13.7904	0.00158124	45.13	218789	2.39663	631.314	1534.18	1.58124	31177	690.826	0.0202493
2017	Fufeng County	0.499801	0.126427	13.3056	0.00208788	42.37	222691	2.94195	7835.42	1768.09	2.08788	30838	727.826	0.254083
2018	Fufeng County	0.537284	0.131692	12.8238	0.00211562	42.26	236639	3.39789	15039.5	1984	2.11562	30611	724.349	0.491311
2019	Fufeng County	0.627944	0.152815	12.9696	0.00222877	42.15	251675	3.49897	22243.6	2087.11	2.22877	30548	724.745	0.728154
2020	Fufeng County	0.756368	0.176573	12.8398	0.00248101	31.32	258200	4.93317	2241.96	2191.58	2.48101	30485	973.34	0.0735432
2021	Fufeng County	0.870617	0.193439	13.0526	0.00279041	20.49	264725	6.36737	22491.4	2461.96	2.79041	30422	1484.72	0.739312
2012	Fengxiang District	0.403667	0.101598	10.9678	0.00174287	51	159456	2.79546	14834.4	1212.98	1.74287	46181	905.51	0.321223
2013	Fengxiang District	0.437645	0.0695627	12.7246	0.0016463	52	176949	3.11462	13654.5	1373.71	1.6463	46335	891.058	0.29469
2014	Fengxiang District	0.509976	0.0931183	11.9003	0.00194458	53	190019	3.43377	13777.1	1542.07	1.94458	46332	874.189	0.297357
2015	Fengxiang District	0.469383	0.0969378	12.0899	0.00175558	52.26	220305	3.59285	13723.7	1592.54	1.75558	45813	876.636	0.299559
2016	Fengxiang District	0.303503	0.0542076	12.5819	0.00148016	53	245255	3.81275	16613.5	1713.66	1.48016	45724	862.717	0.363344
2017	Fengxiang District	0.32724	0.054465	12.1852	0.00190658	52.68	197257	3.96453	11699	1771.42	1.90658	45587	865.357	0.25663
2018	Fengxiang District	0.366376	0.0684298	11.7915	0.00184924	49.21	210928	4.45598	6784.43	1838.84	1.84924	45903	932.798	0.147799
2019	Fengxiang District	0.409426	0.0636028	11.7489	0.00196312	48.98	220638	4.56625	1869.88	1896.99	1.96312	45659	932.197	0.0409531
2020	Fengxiang District	0.483642	0.065047	11.5929	0.00263645	48.75	249320	4.91829	18746.8	2033.64	2.63645	45415	931.59	0.412788
2021	Fengxiang District	0.527591	0.0710659	11.8239	0.00262688	38.62	278002	6.8435	18826.9	2241.7	2.62688	45171	1169.63	0.416791
2012	Qishan County	0.321168	0.0596625	11.2915	0.0022631	47	141263	2.85128	744.328	1565.54	2.2631	35237	749.723	0.0211235
2013	Qishan County	0.37634	0.0619492	12.9733	0.00200879	48	168248	3.1875	6443.27	1683.29	2.00879	35234	734.042	0.182871
2014	Qishan County	0.494068	0.0936376	12.1019	0.00236481	47.7	172759	3.12579	6473.42	1741.82	2.36481	35237	738.721	0.183711
2015	Qishan County	0.269748	0.0613122	12.3033	0.00221684	48	203824	2.99688	6445.22	1680.49	2.21684	35237	734.104	0.182911
2016	Qishan County	0.32956	0.069861	12.8034	0.00190867	47.36	269664	3.29624	655.591	1823.71	1.90867	35248	744.257	0.0185994
2017	Qishan County	0.429824	0.0723291	12.3951	0.00229459	46.72	251873	4.37457	3322.87	2203.62	2.29459	35289	755.33	0.0941617
2018	Qishan County	0.404114	0.0709389	11.9418	0.00242996	46.6	261159	4.14372	5990.15	2255.81	2.42996	35286	757.21	0.16976
2019	Qishan County	0.462911	0.0778278	12.0173	0.00252029	46.48	266868	3.8584	8657.43	2095.07	2.52029	35284	759.122	0.245364
2020	Qishan County	0.553186	0.0932342	11.9512	0.00281355	36.52	262599	4.63189	8771.97	1975.4	2.81355	35283	966.128	0.248618
2021	Qishan County	0.636384	0.103568	12.181	0.00305246	26.56	258330	5.40538	886.458	2040.96	3.05246	35282	1328.39	0.0251249
2012	Long County	0.236766	0.0639055	8.99294	0.00234474	27	124368	1.63737	1735.58	190.162	2.34474	35281	1306.7	0.0491931
2013	Long County	0.20376	0.0512189	10.7252	0.00209643	27	130086	1.84747	1616.55	219.06	2.09643	35436	1312.44	0.0456188
2014	Long County	0.307338	0.0653224	9.99992	0.00234746	27	139004	2.11737	1646.93	251.032	2.34746	35479	1314.04	0.0464198
2015	Long County	0.296508	0.0814627	10.3015	0.00202375	27	154625	2.21475	166.659	262.538	2.02375	35442	1312.67	0.00470232
2016	Long County	0.339339	0.0659975	10.6721	0.00173141	27.28	173820	2.47617	2244.57	296.662	1.73141	35413	1298.13	0.0633827
2017	Long County	0.396204	0.0532649	10.3921	0.00206736	25.29	183691	3.35389	1601.22	372.508	2.06736	35368	1398.5	0.0452732
2018	Long County	0.423646	0.0658495	9.92996	0.0021587	25.25	183691	3.85827	957.876	427.849	2.1587	35360	1400.4	0.0270893
2019	Long County	0.544727	0.0841613	9.97757	0.00239895	25.2	235636	3.63352	314.53	402.077	2.39895	35341	1402.42	0.00889985
2020	Long County	0.716158	0.102473	9.66812	0.00284221	20.85	243907	4.73199	337.339	433.297	2.84221	35322	1694.1	0.00955041
2021	Long County	0.858772	0.120785	10.1094	0.00274097	16.5	252178	5.83046	35.8261	478.033	2.74097	35303	2139.58	0.00101482
2012	Qianyang County	0.178079	0.0457987	10.6316	0.00187797	13	77806	1.99538	398.557	260.442	1.87797	35284	2714.15	0.0112957
2013	Qianyang County	0.20922	0.0417598	12.4439	0.00164994	13	84702	2.38538	384.924	311.033	1.64994	18574	1428.77	0.0207238
2014	Qianyang County	0.309447	0.0666697	11.7181	0.00194804	13	97571	2.69692	3813.16	351.655	1.94804	18567	1428.23	0.205373
2015	Qianyang County	0.35048	0.0893306	11.896	0.00169192	13	104636	3.16238	384.568	412.337	1.69192	18552	1427.08	0.0207292
2016	Qianyang County	0.405364	0.0756309	12.3347	0.00145761	13.46	121453	3.61516	3928.13	488.064	1.45761	18599	1381.8	0.211201
2017	Qianyang County	0.473966	0.0882122	11.9803	0.00179679	12.59	119431	4.31612	4416.63	545.035	1.79679	18677	1483.48	0.236474
2018	Qianyang County	0.503758	0.1128	11.681	0.00183157	12.57	129604	4.75481	4905.14	599.386	1.83157	18637	1482.66	0.263194
2019	Qianyang County	0.622204	0.116867	11.5835	0.00191056	12.54	143863	5.39838	5393.65	678.951	1.91056	18584	1481.98	0.290231
2020	Qianyang County	0.784676	0.120934	11.2494	0.00249676	9.95	148560	7.41939	5462.24	740.45	2.49676	18186	1827.74	0.300354
2021	Qianyang County	0.864215	0.125094	11.5693	0.00255338	7.36	153257	9.44039	5514.13	822.52	2.55338	17788	2416.85	0.309992
2012	Weibin District	0.324597	0.0482507	9.1551	0.00306593	44.02	122768	9.24943	14552	7007.92	3.06593	17390	395.048	0.8368
2013	Weibin District	0.372955	0.0644649	10.8526	0.0028429	44.18	132242	9.67665	13273.5	7353.7	2.8429	6504	147.216	2.04082
2014	Weibin District	0.431154	0.0825447	10.012	0.00279098	43.48	157452	1.2569	13315.4	7671.26	2.79098	6389	146.941	2.08412
2015	Weibin District	0.402132	0.0943818	10.4277	0.00280148	43.63	182538	1.77149	13341.8	8088.81	2.80148	5969	136.81	2.23519
2016	Weibin District	0.256889	0.0697058	10.6352	0.0024089	43.6	182538	11.4794	1339.4	8614.46	2.4089	5934	136.101	0.225716
2017	Weibin District	0.300275	0.0701408	10.3799	0.00300847	45.61	165090	11.6459	1435.51	9142.34	3.00847	5565	122.013	0.257953
2018	Weibin District	0.345859	0.0767144	9.90377	0.0029721	45.53	188321	11.9987	1531.62	9402.75	2.9721	5427	119.196	0.282222
2019	Weibin District	0.375486	0.0883741	10.0165	0.0032727	45.45	183678	11.4662	1627.73	8969.71	3.2727	5104	112.299	0.318913
2020	Weibin District	0.430672	0.100034	9.64799	0.0038194	53.58	197776	9.99235	14489.3	9214.97	3.8194	5080	94.8115	2.85223
2021	Weibin District	0.485858	0.111694	10.1215	0.00421676	61.71	211874	8.51847	12693.9	9460.24	4.21676	5056	81.9316	2.51066
2012	Jintai District	0.223325	0.0504692	12.0264	0.00216917	38.76	116692	6.22423	8534.73	7807.44	2.16917	5032	129.825	1.69609
2013	Jintai District	0.302062	0.0246949	13.9052	0.00217104	38.47	126698	7.16743	7853.69	8923.3	2.17104	10748	279.387	0.730711
2014	Jintai District	0.314582	0.0255999	13.1043	0.00220695	38.26	140635	7.72216	7993.22	9561.49	2.20695	10613	277.392	0.753153
2015	Jintai District	0.445103	0.0878256	13.4109	0.00204814	38.01	168255	8.39463	899.629	9845.63	2.04814	10176	267.719	0.088407
2016	Jintai District	0.176927	0.0516276	13.927	0.00166674	37.79	168255	8.9574	874.285	10954.7	1.66674	10122	267.849	0.0863747
2017	Jintai District	0.289473	0.0655456	13.4608	0.0022783	40.13	178504	8.91627	5362.18	11579.6	2.2783	10199	254.149	0.525756
2018	Jintai District	0.356649	0.107731	12.8998	0.00221736	39.98	188139	9.27885	9850.08	11995.1	2.21736	10127	253.302	0.972656
2019	Jintai District	0.314078	0.0810909	12.9393	0.00246316	39.83	192089	9.16269	14338	11810.7	2.46316	10065	252.699	1.42454
2020	Jintai District	0.271507	0.0544504	12.6084	0.00332499	46.1	196936	7.86443	15726.7	11733	3.32499	9903	214.816	1.58808
2021	Jintai District	0.228936	0.0421357	12.8839	0.00304785	52.37	201783	6.56616	1789.85	11655.3	3.04785	9741	186.003	0.183744
2012	Jingyang County	0.460683	0.0869082	14.1061	0.00140196	53	159800	2.22679	466.286	1490.15	1.40196	9579	180.736	0.048678
2013	Jingyang County	0.470409	0.118788	16.0821	0.00128133	54	209128	2.51852	46.4358	1704.67	1.28133	44397	822.167	0.00104592
2014	Jingyang County	0.565898	0.143886	15.1756	0.00157016	54	218719	2.81537	382.566	1919.57	1.57016	43757	810.315	0.00874296
2015	Jingyang County	0.700643	0.147693	15.195	0.00135636	54	219136	2.96722	3794.86	2023.11	1.35636	43100	798.148	0.0880479
2016	Jingyang County	0.630292	0.142853	15.8157	0.00120943	54.21	247594	3.32712	3583.93	2260.61	1.20943	42459	783.232	0.0844093
2017	Jingyang County	0.31682	0.0641655	15.2603	0.00180917	31.66	220301	2.39924	2538.89	1332.63	1.80917	41995	1326.44	0.0604569
2018	Jingyang County	0.304227	0.05209	15.2003	0.00136223	31.48	220964	2.39616	1493.84	1323.35	1.36223	30607	972.268	0.0488073
2019	Jingyang County	0.321321	0.0615747	15.0683	0.00170691	31.58	230159	2.39837	448.799	1328.6	1.70691	30807	975.522	0.0145681
2020	Jingyang County	0.348604	0.0761538	14.7596	0.00168149	24.17	254466	3.34741	466.747	1419.25	1.68149	30807	1274.6	0.0151507
2021	Jingyang County	0.415569	0.0988311	14.9816	0.00230421	16.76	278773	4.29646	3889.99	2048.74	2.30421	30807	1838.13	0.12627
2012	Sanyuan County	0.179668	0.006139	14.0559	0.00137412	42	158501	2.86857	6719.63	2088.04	1.37412	30807	733.5	0.21812
2013	Sanyuan County	0.221202	0.0476569	16.021	0.00114554	43	184626	3.27465	6655.24	2440.38	1.14554	33208	772.279	0.200411
2014	Sanyuan County	0.380535	0.102677	15.1047	0.00151536	42	188235	3.81262	6482.65	2775.22	1.51536	33129	788.786	0.195679
2015	Sanyuan County	0.461285	0.126641	15.1485	0.00122426	42	222117	4.22929	6473.15	3078.51	1.22426	33055	787.024	0.19583
2016	Sanyuan County	0.408077	0.112943	15.7627	0.00107098	41.76	219181	4.63386	6568.3	3353.73	1.07098	32980	789.751	0.19916
2017	Sanyuan County	0.459745	0.101876	15.2392	0.00167363	41.23	238264	5.72617	7009.79	4091.68	1.67363	32902	798.011	0.21305
2018	Sanyuan County	0.461061	0.134877	15.2609	0.00119468	41.17	256131	5.82355	7451.28	4155.21	1.19468	32836	797.571	0.226924
2019	Sanyuan County	0.503538	0.140381	15.0808	0.0015454	41.19	279605	5.22816	7892.77	3732.2	1.5454	32751	795.12	0.240993
2020	Sanyuan County	0.623378	0.155988	14.6603	0.00164772	35.73	282681	5.8147	7835.84	3600.67	1.64772	32730	916.037	0.239408
2021	Sanyuan County	0.731463	0.171834	14.9059	0.00218422	30.27	285757	6.40123	745.493	4091.59	2.18422	32709	1080.57	0.0227917
2012	Liquan County	0.28259	0.0750615	12.8973	0.00152011	50	168364	2.1724	2824.18	1074.38	1.52011	32688	653.76	0.0863982
2013	Liquan County	0.27302	0.0866774	14.7036	0.00149152	50	200351	2.5572	28271.4	1263.44	1.49152	30850	617	0.916416
2014	Liquan County	0.352879	0.0772859	13.8437	0.00173398	51	195649	2.84353	28647	1433	1.73398	30033	588.882	0.95385
2015	Liquan County	0.422187	0.093031	13.8722	0.00154684	51	186524	2.97759	28767.2	1500.3	1.54684	28865	565.98	0.996611
2016	Liquan County	0.45571	0.0906656	14.5132	0.00133611	48.42	227528	3.39128	28723	1622.04	1.33611	28876	596.365	0.994701
2017	Liquan County	0.539241	0.116391	14.0293	0.00191455	45.68	257975	3.81283	20306.5	1721.05	1.91455	28874	632.093	0.703278
2018	Liquan County	0.527533	0.125476	13.7465	0.00165323	45.58	283000	3.52162	11889.9	1586.12	1.65323	28866	633.304	0.411901
2019	Liquan County	0.589749	0.141347	13.7359	0.00182248	45.38	286032	3.38255	3473.4	1516.8	1.82248	28841	635.544	0.120433
2020	Liquan County	0.659157	0.161811	13.5256	0.00184008	36.56	320209	4.27188	3445.72	1543.28	1.84008	28823	788.375	0.119548
2021	Liquan County	0.752662	0.186735	13.7576	0.00253423	27.74	343536	5.16122	32534.6	1700.89	2.53423	28805	1038.39	1.12948
2012	Qindu District	0.195534	0.039161	13.5037	0.00163259	49.78	148444	6.62997	28872.3	25644.1	1.63259	28787	578.284	1.00296
2013	Qindu District	0.262287	0.0512668	15.3286	0.00138169	50.63	176133	7.41244	2956	29160.1	1.38169	10335	204.128	0.286018
2014	Qindu District	0.507625	0.112071	14.3657	0.00192601	50.45	178070	8.42439	29515.9	33023.3	1.92601	9962	197.463	2.96285
2015	Qindu District	0.568289	0.128633	14.4849	0.00177085	51.16	179622	9.11923	29298	36250.2	1.77085	8891	173.788	3.29524
2016	Qindu District	0.320809	0.0834609	15.0824	0.00154946	52.02	226998	9.98847	29446.9	40373	1.54946	8524	163.86	3.45458
2017	Qindu District	0.342217	0.0902796	14.5607	0.00193035	35.3	225770	11.3598	20844.4	31157.7	1.93035	8524	241.473	2.44538
2018	Qindu District	0.252366	0.0507535	14.2172	0.00165324	35.12	218498	1.93417	12242	29745.1	1.65324	3573	101.737	3.42625
2019	Qindu District	0.303836	0.0542808	14.3049	0.00209801	34.9	222983	9.85244	3639.57	26717.2	2.09801	3611	103.467	1.00791
2020	Qindu District	0.369451	0.0648804	13.9726	0.0019486	49.16	236490	7.36249	36529.1	28122.8	1.9486	3555	72.3149	10.2754
2021	Qindu District	0.437722	0.0768079	14.2268	0.00265389	63.42	249997	4.87254	34919.5	29528.4	2.65389	3499	55.1719	9.97984
2012	Weicheng District	0.0912284	0.0185961	13.9431	0.00132385	41.22	118807	6.46385	223.935	9795.59	1.32385	3443	83.5274	0.0650408
2013	Weicheng District	0.169097	0.047361	15.9011	0.00108345	41.54	134161	7.34762	2296.54	11221.3	1.08345	13124	315.936	0.174988
2014	Weicheng District	0.265395	0.0594408	14.9033	0.00163757	41.57	149388	7.61198	22447.8	11633.5	1.63757	12660	304.547	1.77313
2015	Weicheng District	0.300964	0.0766096	14.9585	0.0014793	41.21	158298	7.59743	22541.5	11510.7	1.4793	12421	301.407	1.81479
2016	Weicheng District	0.240855	0.0485137	15.5931	0.00128337	41.52	192938	8.36848	22726.6	12680.1	1.28337	12100	291.426	1.87823
2017	Weicheng District	0.249824	0.0520751	15.0449	0.00175724	21.6	148474	14.7374	16088.7	11173.5	1.75724	11964	553.889	1.34476
2018	Weicheng District	0.358424	0.0716708	14.8049	0.00136151	21.29	134849	17.7886	9450.74	13923.5	1.36151	11828	555.566	0.799014
2019	Weicheng District	0.352109	0.0912665	14.7885	0.00181285	21.37	115913	12.7192	2812.82	9433.46	1.81285	11692	547.122	0.240576
2020	Weicheng District	0.427552	0.109066	14.4132	0.00162138	30.35	117126	9.46787	28378.8	10094.5	1.62138	11556	380.758	2.45576
2021	Weicheng District	0.502995	0.123599	14.6164	0.00241062	39.33	118339	6.21656	27274	10755.5	2.41062	11420	290.364	2.38827
2012	Qian County	0.137414	0.0314094	12.7465	0.00150549	60	172992	1.815	2755.94	1077.67	1.50549	11284	188.067	0.244235
2013	Qian County	0.203165	0.0565909	14.401	0.00140311	60	196555	2.12167	2515.33	1268.3	1.40311	51258	854.3	0.049072
2014	Qian County	0.414261	0.10222	13.5637	0.00183678	60	223096	2.41733	2637.31	1446.06	1.83678	49915	831.917	0.0528361
2015	Qian County	0.456737	0.105399	13.6159	0.00164641	60	228156	2.51233	2337.76	1502.89	1.64641	48443	807.383	0.0482579
2016	Qian County	0.455802	0.115607	14.3364	0.00132134	59.92	239018	2.79947	278.4	1618.94	1.32134	46630	778.204	0.0059704
2017	Qian County	0.472004	0.102912	13.8448	0.00189542	53.66	280015	3.3347	8301.26	1784.05	1.89542	46642	869.214	0.177978
2018	Qian County	0.524809	0.131802	13.3453	0.00175703	53.61	290402	3.2396	16324.1	1731.27	1.75703	46959	875.937	0.347625
2019	Qian County	0.5549	0.141223	13.4759	0.00187318	53.57	313800	3.23697	24347	1711.09	1.87318	46917	875.807	0.518937
2020	Qian County	0.64853	0.158627	13.3266	0.0019851	45.67	320210	3.47515	2452.33	1551.56	1.9851	47064	1030.52	0.0521063
2021	Qian County	0.768733	0.177394	13.5503	0.00259407	37.77	327276	3.71333	23517.7	1752.84	2.59407	47211	1249.96	0.498141
2012	Wugong County	0.0829009	0.0144435	12.5265	0.00193092	46	141676	1.61174	14477.7	1862.81	1.93092	47358	1029.52	0.305709
2013	Wugong County	0.193765	0.0497298	14.0692	0.00170644	46	165429	2.85652	1454.9	2410.55	1.70644	26528	576.696	0.0548438
2014	Wugong County	0.377682	0.101988	13.2363	0.00223772	45	172433	2.44533	14754.8	2764.82	2.23772	26767	594.822	0.55123
2015	Wugong County	0.428197	0.102294	13.4367	0.00198411	45	195187	2.49889	14859.7	2825.38	1.98411	26906	597.911	0.552282
2016	Wugong County	0.460921	0.114493	14.0582	0.00157348	44.81	209098	2.75521	14925.6	3096.73	1.57348	26937	601.138	0.554093
2017	Wugong County	0.503894	0.107285	13.5393	0.00218716	42.09	225441	3.34759	16092.9	3540.2	2.18716	26955	640.413	0.59703
2018	Wugong County	0.545906	0.137233	12.9976	0.00214164	41.74	247989	3.38376	17260.3	3548.69	2.14164	26967	646.071	0.640052
2019	Wugong County	0.645164	0.146251	13.2049	0.00239419	41.48	277382	3.69226	18427.6	3848.12	2.39419	26978	650.386	0.683061
2020	Wugong County	0.765775	0.167391	13.0502	0.00250643	31.77	273935	4.86575	18556.9	3884.05	2.50643	27590	868.429	0.672597
2021	Wugong County	0.91402	0.195906	13.3223	0.00293881	22.06	275818	6.03925	17796.4	4305.28	2.93881	28202	1278.42	0.631033
2012	Xingping City	0.187634	0.0518291	13.149	0.00183251	61	177113	2.38328	22154.6	2858.27	1.83251	28814	472.361	0.768882
2013	Xingping City	0.286456	0.0709265	14.8324	0.00158143	62	197989	2.82613	22248.3	3449.21	1.58143	35810	577.581	0.621287
2014	Xingping City	0.386661	0.0857255	13.9102	0.00213611	62	210795	2.94793	22578.4	3597.83	2.13611	34875	562.5	0.64741
2015	Xingping City	0.445868	0.111215	14.0984	0.00193467	62	251300	3.91924	22647.4	3773.61	1.93467	33924	547.161	0.667591
2016	Xingping City	0.471192	0.0982813	14.71	0.00162907	61.42	262500	3.54396	22777.5	4284.84	1.62907	32687	532.188	0.696835
2017	Xingping City	0.563616	0.135105	14.1838	0.00207742	50.97	285083	4.7343	24568.9	5322.52	2.07742	31490	617.814	0.780214
2018	Xingping City	0.600275	0.129058	13.7284	0.001921	50.61	289400	4.96742	26360.4	5481.9	1.921	28145	556.115	0.936593
2019	Xingping City	0.626431	0.157421	13.8902	0.00226329	50.63	308908	4.77274	28151.9	5334.3	2.26329	28031	553.644	1.00431
2020	Xingping City	0.686599	0.15356	13.6577	0.00219715	46.33	312416	5.22577	28395.6	5344.59	2.19715	27957	603.432	1.01569
2021	Xingping City	0.851973	0.144801	13.9378	0.00281066	42.03	318002	5.6788	27276.4	6202.07	2.81066	27883	663.407	0.978244
2012	Tongguan County	0.144511	0.0441112	12.9671	0.0023656	17	100518	1.92941	7366.41	623.574	2.3656	27809	1635.82	0.264893
2013	Tongguan County	0.195065	0.0542264	14.7644	0.00195643	17	106600	2.27941	7356.22	736.692	1.95643	10654	626.706	0.690465
2014	Tongguan County	0.298675	0.0740654	13.8899	0.00242622	16	118600	2.56875	747.324	781.369	2.42622	10720	670	0.0697131
2015	Tongguan County	0.327623	0.0926104	13.8385	0.00237583	16	142800	2.28437	747.662	694.867	2.37583	10661	666.312	0.0701306
2016	Tongguan County	0.405935	0.115163	14.22	0.00232433	15.52	136600	2.37758	7456.42	701.521	2.32433	10593	682.539	0.703901
2017	Tongguan County	0.548186	0.146315	14.1541	0.00247154	15.94	138800	2.87139	5032.92	870.152	2.47154	10660	668.758	0.472131
2018	Tongguan County	0.642025	0.167947	13.8428	0.00225687	15.42	140068	2.61665	2609.42	767.086	2.25687	10703	694.099	0.243803
2019	Tongguan County	0.700504	0.16744	14.2729	0.00232468	15.12	140289	2.92395	185.917	840.251	2.32468	10720	708.995	0.017343
2020	Tongguan County	0.769255	0.181638	13.8574	0.00246732	12.53	153036	3.51836	1651.26	838.12	2.46732	10710	854.749	0.154179
2021	Tongguan County	0.859617	0.196798	14.0437	0.00341779	9.94	156609	4.11278	133.259	900.631	3.41779	10700	1076.46	0.0124541
2012	Huazhou District	0.213	0.0644788	10.8216	0.00251011	35	195794	3.16257	11711.5	971.817	2.51011	10690	305.429	1.09556
2013	Huazhou District	0.331285	0.0852487	12.4829	0.0020457	35	144750	3.26943	11985.8	1004.65	2.0457	23958	684.514	0.500284
2014	Huazhou District	0.457761	0.114519	11.672	0.00259428	35	151161	3.37143	11996.2	1016.24	2.59428	23922	683.486	0.50147
2015	Huazhou District	0.480406	0.107332	11.7369	0.00245097	34	183378	3.17735	11971.2	948.464	2.45097	23922	703.588	0.500426
2016	Huazhou District	0.415778	0.100779	12.023	0.00225212	34.1	171000	2.58797	11999.7	774.539	2.25212	23952	702.405	0.500988
2017	Huazhou District	0.431699	0.11826	11.8347	0.00277294	32.8	207170	2.89573	13784.2	833.889	2.77294	23746	723.963	0.580485
2018	Huazhou District	0.545834	0.129855	11.5817	0.00239937	31.81	224559	2.37692	15568.7	663.825	2.39937	23632	742.911	0.658799
2019	Huazhou District	0.651426	0.135083	11.7885	0.0026281	31.38	249044	3.16562	17353.3	872.145	2.6281	23590	751.753	0.73562
2020	Huazhou District	0.728491	0.140977	11.4389	0.00270418	26.86	256038	3.59584	17332.5	847.975	2.70418	23608	878.928	0.734181
2021	Huazhou District	0.814476	0.151447	11.7562	0.00367704	22.34	249695	4.02606	1741.66	983.143	3.67704	23626	1057.56	0.0737178
2012	Huayin City	0.277111	0.0828196	12.0069	0.00258129	26	123223	2.61154	3852.55	827.785	2.58129	23644	909.385	0.16294
2013	Huayin City	0.330853	0.0751892	13.6998	0.00211491	27	126280	2.74296	3821.33	906.487	2.11491	12758	472.519	0.299524
2014	Huayin City	0.296263	0.0736163	12.8512	0.00261845	26	127778	3.13462	3842.69	958.996	2.61845	12727	489.5	0.301932
2015	Huayin City	0.217879	0.0397333	12.8899	0.00245396	26	135994	3.93769	3835.86	984.333	2.45396	12703	488.577	0.301965
2016	Huayin City	0.188798	0.0305609	13.2099	0.00236818	25.47	152133	2.74912	384.595	857.038	2.36818	12580	493.914	0.0305719
2017	Huayin City	0.298978	0.0387337	13.0578	0.00269572	26.34	186688	3.22551	2111.85	1039.9	2.69572	12557	476.727	0.168181
2018	Huayin City	0.555973	0.0949279	12.8082	0.0023746	25.18	204380	3.62389	3839.11	1115.81	2.3746	12567	499.087	0.305491
2019	Huayin City	0.53104	0.0949918	13.1256	0.00259252	24.78	206192	2.85673	5566.36	866.46	2.59252	12569	507.224	0.442864
2020	Huayin City	0.604059	0.0958946	12.696	0.00273115	20.51	210948	3.53412	5566.94	887.206	2.73115	12567	612.725	0.442981
2021	Huayin City	0.647085	0.101796	12.9838	0.00366424	16.24	215549	4.2115	548.562	949.816	3.66424	12565	773.707	0.0436579
2012	Linwei District	0.350384	0.0882106	13.7405	0.00168354	98.45	274551	2.66653	2583.43	2077.29	1.68354	12563	127.608	0.205638
2013	Linwei District	0.342578	0.087872	15.4935	0.00138068	99.36	365762	2.75532	2568.16	2166.08	1.38068	69495	699.426	0.0369546
2014	Linwei District	0.38152	0.0967445	14.6277	0.00192486	96.29	380995	3.15495	2579.38	2403.86	1.92486	69522	722.006	0.0371016
2015	Linwei District	0.458604	0.105882	14.7578	0.00154628	96.8	432053	3.16952	2578.88	2427.76	1.54628	65963	681.436	0.0390959
2016	Linwei District	0.430834	0.101665	15.2129	0.00141677	96.2	472469	3.45818	2594.2	2632.38	1.41677	65683	682.775	0.0394957
2017	Linwei District	0.494207	0.110286	14.8181	0.00199069	90.01	483563	4.11643	3009.94	2931.89	1.99069	63547	705.999	0.0473656
2018	Linwei District	0.619266	0.139279	14.7193	0.00153857	91.21	500162	4.68113	3425.69	3320.57	1.53857	61591	675.266	0.0556199
2019	Linwei District	0.558058	0.13451	14.7143	0.00182138	91.48	516550	4.67436	3841.43	3383.63	1.82138	59444	649.803	0.0646227
2020	Linwei District	0.462287	0.109218	14.3888	0.00193422	92	520183	4.83152	3865.18	3496.63	1.93422	52668	572.478	0.0733877
2021	Linwei District	0.366525	0.0982403	14.676	0.00270293	92.52	523816	4.98869	3828.55	3609.63	2.70293	45892	496.022	0.0834253
2012	Dali County	0.133454	0.0274282	14.4988	0.00140024	73	213522	1.37788	498.846	566.329	1.40024	39116	535.836	0.012753
2013	Dali County	0.179945	0.0394282	16.2368	0.00115514	73	250532	1.54658	3946.93	618.468	1.15514	76399	1046.56	0.051662
2014	Dali County	0.216174	0.0505979	15.3243	0.00175706	73	262388	1.53932	3549.94	632.714	1.75706	75705	1037.05	0.0468918
2015	Dali County	0.248261	0.0654711	15.4398	0.00131651	74	300869	1.41527	3394.96	589.696	1.31651	74380	1005.14	0.0456435
2016	Dali County	0.260327	0.0504734	15.8802	0.00126945	73.14	302274	1.58532	343.386	652.872	1.26945	74031	1012.18	0.0046384
2017	Dali County	0.507282	0.0671455	15.6411	0.00163258	70.44	370000	2.33975	933.038	912.387	1.63258	70692	1003.58	0.0131986
2018	Dali County	0.486066	0.0967504	15.5314	0.00127961	69.63	407096	2.16254	1522.69	847.846	1.27961	67571	970.429	0.0225347
2019	Dali County	0.605441	0.124783	15.7245	0.00139834	68.91	427539	2.44616	2112.34	949.105	1.39834	66876	970.483	0.0315859
2020	Dali County	0.72503	0.150876	15.1236	0.00173946	59.29	446363	2.96196	295.163	988.232	1.73946	64259	1083.81	0.00459333
2021	Dali County	0.83507	0.176968	15.4567	0.00244131	49.67	420136	3.47776	245.265	1083.68	2.44131	61642	1241.03	0.00397887
2012	Pucheng County	0.149893	0.0372704	13.8569	0.00110596	79	237162	1.6457	524.952	820.77	1.10596	59025	747.152	0.00889373
2013	Pucheng County	0.207498	0.0471771	15.6232	0.00105209	80	265041	1.77337	515.872	895.644	1.05209	97855	1223.19	0.0052718
2014	Pucheng County	0.254174	0.0599202	14.7094	0.00151607	79	304836	1.91925	4959.38	957.197	1.51607	94933	1201.68	0.0522408
2015	Pucheng County	0.344582	0.0938399	14.819	0.00121696	79	348416	1.96456	4819.22	979.545	1.21696	93352	1181.67	0.0516242
2016	Pucheng County	0.374086	0.0942933	15.3863	0.00104962	79.21	372132	2.59462	4776.4	1029.86	1.04962	91033	1149.26	0.0524688
2017	Pucheng County	0.450897	0.105202	15.044	0.00153273	75.2	419300	2.41396	5473.08	1146.02	1.53273	88093	1171.45	0.0621284
2018	Pucheng County	0.586845	0.116501	15.039	0.00102351	74.36	474398	2.56366	6169.76	1203.49	1.02351	88571	1191.11	0.0696589
2019	Pucheng County	0.700523	0.148858	15.0585	0.00123606	73.62	496776	2.63728	6866.45	1225.74	1.23606	88906	1207.63	0.0772326
2020	Pucheng County	0.808117	0.163041	14.4588	0.00158395	66.26	484979	3.71773	6838.18	1284.95	1.58395	88717	1338.92	0.0770785
2021	Pucheng County	0.950908	0.193805	14.8514	0.00220057	58.9	505140	4.79818	673.845	1426.75	2.20057	88528	1503.02	0.00761166
2012	Fuping County	0.0957969	0.0219658	13.2989	0.00122625	80	251983	1.25125	1317.23	805.958	1.22625	88339	1104.24	0.014911
2013	Fuping County	0.152354	0.0372321	15.1208	0.00113639	81	281364	1.48296	13125.7	967.15	1.13639	70987	876.383	0.184902
2014	Fuping County	0.250452	0.060473	14.2203	0.0015515	80	308006	1.69388	13198	1090.19	1.5515	71002	887.525	0.185882
2015	Fuping County	0.325659	0.0925045	14.2653	0.00126935	79	350247	1.65	13135.4	1048.67	1.26935	70814	896.38	0.185491
2016	Fuping County	0.288704	0.0633379	14.9285	0.0010439	80.01	372205	1.71636	13135.5	1104.59	1.0439	70171	877.028	0.187192
2017	Fuping County	0.3566	0.0848398	14.4732	0.00163843	75.37	458520	1.91694	15239.6	1163.29	1.63843	68101	903.556	0.223779
2018	Fuping County	0.456187	0.0830575	14.435	0.00112007	75.03	484139	2.21244	17343.7	1336.53	1.12007	66601	887.658	0.260412
2019	Fuping County	0.757722	0.204775	14.3825	0.00140855	74.27	501325	2.47697	19447.8	1481.19	1.40855	66597	896.688	0.292022
2020	Fuping County	0.865926	0.227641	13.9404	0.00166177	64.25	502214	3.58949	19585.8	1554.57	1.66177	66330	1032.37	0.295278
2021	Fuping County	0.965232	0.249497	14.3004	0.00216688	54.23	491400	4.70202	19417.8	1728.38	2.16688	66063	1218.2	0.293928
2012	Shenmu City	0.377647	0.0722639	8.08605	0.00164227	45	678458	22.3867	4787.56	1314.85	1.64227	65796	1462.13	0.0727637
2013	Shenmu City	0.401803	0.0887642	9.43732	0.00174477	43	633924	21.5242	5426.86	1212.23	1.74477	45155	1050.12	0.120183
2014	Shenmu City	0.487093	0.104467	9.59744	0.00109834	44	388726	22.5455	5349.76	1268.16	1.09834	48474	1101.68	0.110364
2015	Shenmu City	0.523244	0.111106	9.74809	0.00121556	44	365829	18.5775	5291.93	1070.61	1.21556	81855	1860.34	0.06465
2016	Shenmu City	0.537484	0.109567	9.2909	0.00169724	44.31	773612	2.41977	5349.57	1185.07	1.69724	81990	1850.37	0.0652466
2017	Shenmu City	0.592305	0.148248	9.68297	0.00161777	47.12	871336	23.5639	3727	1454.26	1.61777	82142	1743.25	0.0453726
2018	Shenmu City	0.589366	0.167779	9.21597	0.00163353	48.5	1057700	26.7636	2104.43	1700.1	1.63353	82279	1696.47	0.0255767
2019	Shenmu City	0.640223	0.179094	9.72722	0.00128882	48.78	1337864	27.9393	481.857	1785.04	1.28882	82850	1698.44	0.00581602
2020	Shenmu City	0.710178	0.174904	9.4701	0.00105407	57.3	1246227	22.583	491.145	1694.83	1.05407	83421	1455.86	0.00588754
2021	Shenmu City	0.388041	0.0860712	10.0294	0.0010808	65.82	1336700	17.2266	4942.8	2420.65	1.0808	83992	1276.09	0.0588485
2012	Yuyang District	0.218247	0.0312521	8.27353	0.00144163	54.57	314069	7.35916	5527.42	568.68	1.44163	43255	792.652	0.127787
2013	Yuyang District	0.249051	0.0572557	9.61518	0.00160588	55.41	335598	8.32449	6189.8	653.991	1.60588	53168	959.538	0.11642
2014	Yuyang District	0.4322	0.105992	9.68426	0.000986223	55.54	405025	9.15682	612.961	721.069	0.986223	63415	1141.79	0.00966587
2015	Yuyang District	0.427312	0.0939175	9.82713	0.00116617	57	409384	9.52872	581.867	770.027	1.16617	65069	1141.56	0.00894231
2016	Yuyang District	0.392254	0.0760722	9.4008	0.00144408	58.48	450187	9.51984	5941.52	789.338	1.44408	63710	1089.43	0.0932589
2017	Yuyang District	0.454136	0.0990722	9.69896	0.00150829	66.2	524548	1.55963	6406.26	990.316	1.50829	77227	1166.57	0.0829537
2018	Yuyang District	0.519484	0.121102	9.29324	0.00151263	68.48	639406	11.3547	6871	1102.06	1.51263	82310	1201.96	0.0834771
2019	Yuyang District	0.56689	0.107429	9.73712	0.00123656	68.87	766658	13.6738	7335.74	1328.71	1.23656	82747	1201.5	0.0886527
2020	Yuyang District	0.6088	0.108201	9.47624	0.000898383	96.8	826511	1.34112	751.888	1419.28	0.898383	84976	877.851	0.00884824
2021	Yuyang District	0.643884	0.115431	10.213	0.00095284	124.73	886364	10.9915	7598.4	1509.85	0.95284	87205	699.15	0.0871326
2012	Hengshan District	0.124196	0.0191114	8.9049	0.00147736	37	198881	2.81676	3326.72	243.391	1.47736	89434	2417.14	0.0371974
2013	Hengshan District	0.408067	0.0677997	10.2849	0.0018816	37	213308	3.29324	3724.24	284.563	1.8816	59573	1610.08	0.0625156
2014	Hengshan District	0.421807	0.0886402	10.0795	0.00122946	37	196305	3.67818	3582.85	317.819	1.22946	60855	1644.73	0.0588752
2015	Hengshan District	0.473526	0.0898079	10.3556	0.00127131	38	264716	3.66526	3598.43	272.092	1.27131	60619	1595.24	0.0593614
2016	Hengshan District	0.496296	0.0947515	10.025	0.00151092	37.9	234524	3.19683	3678.13	279.622	1.51092	60623	1599.55	0.0606722
2017	Hengshan District	0.539739	0.127914	10.3097	0.00151077	31.25	285500	4.94272	3949.61	356.474	1.51077	65408	2093.06	0.0603842
2018	Hengshan District	0.695758	0.17852	10.0042	0.00144829	31.35	324262	6.42743	4221.09	437.203	1.44829	81393	2596.27	0.0518606
2019	Hengshan District	0.714387	0.161332	10.3193	0.00130197	31.64	361200	6.36757	4492.56	464.967	1.30197	81315	2570.01	0.0552489
2020	Hengshan District	0.682817	0.144144	9.93352	0.00106971	28.4	430990	7.22274	4582.64	460.26	1.06971	81384	2865.63	0.0563089
2021	Hengshan District	0.706616	0.126956	10.7608	0.00106734	25.16	443600	8.07791	4618.74	631.133	1.06734	81453	3237.4	0.0567043
2012	Jingbian County	0.331128	0.0594409	7.97807	0.00163522	35	282473	9.58571	276.475	623.133	1.63522	81522	2329.2	0.00339142
2013	Jingbian County	0.420833	0.0945587	9.36654	0.00200002	34	313204	1.35765	2424.67	692.138	2.00002	80154	2357.47	0.0302501
2014	Jingbian County	0.509046	0.113485	8.85718	0.00142043	34	327688	1.74882	2532.39	717.748	1.42043	80154	2357.47	0.031594
2015	Jingbian County	0.433542	0.0801866	9.16886	0.00132933	35	331043	7.624	2542.8	524.45	1.32933	85194	2434.11	0.0298472
2016	Jingbian County	0.458794	0.0857285	9.04662	0.0013285	35.6	311727	6.88338	267.839	481.407	1.3285	85751	2408.74	0.00312345
2017	Jingbian County	0.605991	0.141023	9.25178	0.00156454	37.73	328200	8.54864	286.511	597.307	1.56454	85785	2273.65	0.00333987
2018	Jingbian County	0.624848	0.146774	8.96891	0.0014352	38.2	383500	7.75484	305.182	582.223	1.4352	85800	2246.07	0.0035569
2019	Jingbian County	0.740601	0.192432	9.18356	0.00140629	38.41	440129	1.14972	323.854	766.216	1.40629	85834	2234.68	0.00377302
2020	Jingbian County	0.815335	0.218211	8.70688	0.00119533	38.9	365296	9.349	3271.57	714.091	1.19533	85868	2207.4	0.0381
2021	Jingbian County	0.329307	0.0600262	9.61652	0.00123579	39.39	290463	17.5483	33.8155	884.478	1.23579	85902	2180.81	0.000393653
2012	Dingbian County	0.348566	0.0861893	7.77261	0.00137381	34	277248	8.55912	1192.44	420.535	1.37381	134162	3945.94	0.00888807
2013	Dingbian County	0.359755	0.0848368	9.12316	0.0015928	34	303420	9.12	1391.78	448.092	1.5928	136878	4025.82	0.0101681
2014	Dingbian County	0.470013	0.111069	8.49677	0.00138729	35	327717	9.66829	1448.36	489.003	1.38729	138925	3969.29	0.0104255
2015	Dingbian County	0.419674	0.104086	8.79893	0.00126794	35	343155	7.36857	1460	372.298	1.26794	152968	4370.51	0.00954447
2016	Dingbian County	0.478097	0.111428	8.84246	0.00108153	35.21	323574	6.53387	1499.97	332.413	1.08153	161502	4586.82	0.00928761
2017	Dingbian County	0.563872	0.124846	8.92475	0.00135971	33.37	395335	7.65118	1624.54	368.96	1.35971	212526	6368.77	0.00764395
2018	Dingbian County	0.648248	0.153976	8.71257	0.00138186	33.94	413553	9.34838	1749.11	458.503	1.38186	213526	6291.28	0.00819156
2019	Dingbian County	0.683832	0.160644	8.75357	0.00131347	34.21	447296	9.28439	1873.68	458.987	1.31347	213526	6241.63	0.00877496
2020	Dingbian County	0.736161	0.178076	8.37262	0.0011208	33.9	386410	7.76283	193.262	380.289	1.1208	213526	6298.7	0.000905099
2021	Dingbian County	0.376176	0.0773551	9.24545	0.00112742	33.59	483539	6.24127	1964.64	493.809	1.12742	213526	6356.83	0.00920093
2012	Fugu County	0.319249	0.0510655	7.99456	0.00168542	26	290961	17.3277	2994.15	1395.23	1.68542	41557	1598.35	0.0720493
2013	Fugu County	0.3579	0.0777819	9.37191	0.00179398	25	324728	17.4152	3443.25	1348.34	1.79398	43260	1730.4	0.0795942
2014	Fugu County	0.447885	0.114004	9.49197	0.00118278	25	317826	17.4612	3435.52	1351.9	1.18278	43263	1730.52	0.07941
2015	Fugu County	0.353558	0.0774438	9.60517	0.00128772	25	252244	15.354	3458.36	1188.48	1.28772	43263	1730.52	0.079938
2016	Fugu County	0.280937	0.0742233	9.23949	0.00185097	24.78	283489	15.8422	3543.36	1215.76	1.85097	43263	1745.88	0.0819028
2017	Fugu County	0.353992	0.0807519	9.71876	0.00147927	26.89	364647	18.5987	2506.88	1517.12	1.47927	43263	1608.89	0.0579452
2018	Fugu County	0.460245	0.109826	9.27645	0.00163761	27.15	468115	19.8739	1470.41	1542.53	1.63761	43263	1593.48	0.0339877
2019	Fugu County	0.553312	0.122649	9.67182	0.00131216	27.28	516258	22.6359	433.935	1929.1	1.31216	43263	1585.89	0.0100302
2020	Fugu County	0.60759	0.135472	9.39423	0.00107738	25.6	428529	22.7659	442.528	1820.7	1.07738	43263	1689.96	0.0102288
2021	Fugu County	0.706312	0.148295	9.85813	0.00118106	23.92	554238	22.8959	4458.99	2298.92	1.18106	43263	1808.65	0.103067
2012	Jia County	0.212276	0.0533144	9.19761	0.00161677	26	157239	1.22538	2742.47	157.023	1.61677	43263	1663.96	0.0633905
2013	Jia County	0.32443	0.0664198	10.6988	0.00192711	27	171363	1.35475	3228.35	180.187	1.92711	30838	1142.15	0.104687
2014	Jia County	0.419571	0.0919335	10.5732	0.00121379	27	176687	1.53593	3392.32	204.386	1.21379	30844	1142.37	0.109983
2015	Jia County	0.411442	0.0908432	10.8559	0.00146441	27	178702	1.27556	3583.22	169.739	1.46441	30844	1142.37	0.116172
2016	Jia County	0.460575	0.11421	10.4385	0.0017303	26.95	206511	1.47689	3663.12	196.156	1.7303	33590	1246.38	0.109054
2017	Jia County	0.627493	0.164441	10.795	0.00174523	17.83	234515	2.83287	3933.35	248.94	1.74523	58808	3298.26	0.0668846
2018	Jia County	0.74877	0.166091	10.5093	0.00164867	15.55	264676	3.53174	4203.58	270.668	1.64867	53404	3434.34	0.0787129
2019	Jia County	0.768933	0.167772	10.96	0.00124651	15.08	301031	3.81893	4473.81	283.832	1.24651	53405	3541.45	0.0837715
2020	Jia County	0.888129	0.169452	10.4801	0.00132955	11.4	295237	5.55554	457.743	312.14	1.32955	53406	4684.74	0.008571
2021	Jia County	0.445457	0.0664631	11.0424	0.00124925	7.72	296331	7.29216	4613.48	353.622	1.24925	53407	6918.01	0.0863835
2012	Wubu County	0.105316	0.0243507	10.0827	0.00159845	8	83721	1.72125	286.653	329.426	1.59845	8120	1015	0.0353021
2013	Wubu County	0.132902	0.0333806	11.7369	0.00177481	9	102286	1.77667	3319.24	382.536	1.77481	8113	901.444	0.409126
2014	Wubu County	0.240918	0.0508819	11.3361	0.0014178	9	105906	1.97778	3339.69	425.837	1.4178	8101	900.111	0.412257
2015	Wubu County	0.256096	0.0487858	11.8416	0.00138442	8	109127	2.95	3356.79	400.957	1.38442	8098	1012.25	0.414521
2016	Wubu County	0.330914	0.0769625	11.4634	0.00162376	8.43	112210	2.13167	3433.68	429.904	1.62376	8092	959.905	0.424331
2017	Wubu County	0.493717	0.13956	11.77	0.00174947	6.45	151524	3.23729	2303.58	499.522	1.74947	8089	1254.11	0.28478
2018	Wubu County	0.630273	0.150176	11.6597	0.00123656	6.46	170072	3.6234	1173.48	546.895	1.23656	8077	1250.31	0.145287
2019	Wubu County	0.635665	0.160802	12.0545	0.00123216	6.49	169019	4.14681	43.3845	628.804	1.23216	8069	1243.3	0.00537669
2020	Wubu County	0.695677	0.171428	11.307	0.00143188	5.5	166123	5.22364	4486.71	679.601	1.43188	8061	1465.64	0.556595
2021	Wubu County	0.260119	0.0659075	11.8172	0.0014593	4.51	167011	6.30046	4623.35	743.147	1.4593	8053	1785.59	0.574115
2012	Mizhi County	0.463477	0.122573	9.23297	0.00148495	23	140089	1.74435	3861.58	331.023	1.48495	26647	1158.57	0.144916
2013	Mizhi County	0.133858	0.0207781	10.742	0.0019104	22	150672	2.12	4324.67	384.818	1.9104	27859	1266.32	0.155234
2014	Mizhi County	0.179215	0.0275176	10.4614	0.00129051	22	160277	2.21182	421.798	401.485	1.29051	27865	1266.59	0.0151372
2015	Mizhi County	0.14735	0.0298284	10.8197	0.00144474	22	181670	1.88773	473.34	342.657	1.44474	27865	1266.59	0.0169869
2016	Mizhi County	0.11963	0.0348349	10.4497	0.0017939	22.33	191770	2.86946	411.374	369.967	1.7939	27866	1247.92	0.0147626
2017	Mizhi County	0.237717	0.0634685	10.7544	0.0016713	15.58	228513	3.88729	1726.78	396.04	1.6713	27870	1788.83	0.0619583
2018	Mizhi County	0.29622	0.068613	10.5326	0.00146727	14.54	270493	3.96114	3042.18	475.083	1.46727	27870	1916.78	0.109156
2019	Mizhi County	0.252535	0.0640845	10.9141	0.00124907	14.42	240560	4.54724	4357.58	541.017	1.24907	27870	1932.73	0.156354
2020	Mizhi County	0.247509	0.0656078	10.4467	0.0012715	14.2	251884	4.42746	4435.96	518.729	1.2715	27870	1962.68	0.159166
2021	Mizhi County	0.135962	0.0204327	11.0953	0.00121517	13.98	262109	4.30769	4461.79	578.135	1.21517	27870	1993.56	0.160093
2012	Suide County	0.251389	0.0518789	9.61453	0.00156907	37	192100	1.28727	3294.47	256.989	1.56907	31225	843.919	0.105508
2013	Suide County	0.206796	0.0438383	11.1886	0.00184039	37	235100	1.45818	3865.11	291.149	1.84039	41727	1127.76	0.0926286
2014	Suide County	0.201217	0.0397736	10.7687	0.00143324	36	236000	1.525	3882.99	291.905	1.43324	41741	1159.47	0.0930257
2015	Suide County	0.222019	0.0455483	11.2707	0.00141778	36	235266	1.63528	3916.7	317.701	1.41778	41741	1159.47	0.0938333
2016	Suide County	0.206289	0.0479173	10.9062	0.00169623	35.95	262600	1.86787	423.221	362.385	1.69623	43083	1198.41	0.00982339
2017	Suide County	0.498844	0.114072	11.1728	0.00172529	28.64	323800	2.64992	1947.28	409.444	1.72529	48323	1687.26	0.0402971
2018	Suide County	0.721055	0.182757	11.0653	0.00128526	28.75	419500	3.26865	3471.34	507.144	1.28526	52394	1822.4	0.0662545
2019	Suide County	0.400382	0.0810488	11.4252	0.00126939	28.63	372000	3.16271	4995.39	488.658	1.26939	52405	1830.42	0.0953229
2020	Suide County	0.417318	0.0846799	10.8152	0.00136675	25.6	388000	3.91219	5117.67	540.486	1.36675	52416	2047.5	0.0976356
2021	Suide County	0.0929781	0.0204311	11.3886	0.0013997	22.57	441600	4.66166	518.257	599.95	1.3997	52427	2322.86	0.00988531
2012	Zizhou County	0.372532	0.0927463	9.40081	0.0014577	32	158170	1.255	7494.84	196.863	1.4577	27859	870.594	0.269028
2013	Zizhou County	0.0908521	0.0269012	10.9464	0.00184084	32	180774	1.5125	8621.75	237.255	1.84084	29789	930.906	0.289427
2014	Zizhou County	0.0617941	0.00698901	10.5051	0.00140129	30	176603	1.742	8187.62	255.926	1.40129	30484	1016.13	0.268588
2015	Zizhou County	0.131165	0.0308739	10.8963	0.0013278	30	196628	1.46767	8185.19	215.622	1.3278	30440	1014.67	0.268896
2016	Zizhou County	0.12987	0.0337697	10.6082	0.00166864	30.37	238781	1.83438	894.976	272.821	1.66864	30594	1007.38	0.0292533
2017	Zizhou County	0.287863	0.072916	10.8652	0.0016138	16.87	267191	3.72433	873.058	305.877	1.6138	30473	1806.34	0.0286502
2018	Zizhou County	0.31016	0.0776094	10.7116	0.00132625	16.39	294350	3.88239	851.141	311.618	1.32625	30628	1868.7	0.0277896
2019	Zizhou County	0.24455	0.0628536	10.9878	0.00131654	16.05	327500	3.73583	829.223	293.634	1.31654	30628	1908.29	0.027074
2020	Zizhou County	0.282032	0.0790903	10.4379	0.00130143	13.9	294870	4.88779	731.466	332.666	1.30143	30628	2203.45	0.0238823
2021	Zizhou County	0.289545	0.0600298	11.2177	0.00129951	11.75	292560	6.03976	6275.93	378.452	1.29951	30628	2606.64	0.204908
2012	Qingjian County	0.097256	0.00991058	9.96379	0.00154044	22	145274	1.39455	2583.52	163.105	1.54044	45155	2052.5	0.0572144
2013	Qingjian County	0.377228	0.0783713	11.5802	0.00183831	22	180040	1.61182	2966.45	188.517	1.83831	26820	1219.09	0.110606
2014	Qingjian County	0.300285	0.0540808	11.0465	0.00151221	22	161229	1.8	2969.35	209.463	1.51221	27078	1230.82	0.109659
2015	Qingjian County	0.305165	0.054631	11.5698	0.00134152	22	175256	1.866	2984.81	218.235	1.34152	27079	1230.86	0.110226
2016	Qingjian County	0.404815	0.0902197	11.3165	0.00144798	21.7	184055	2.23523	324.9	233.44	1.44798	27099	1248.8	0.0119894
2017	Qingjian County	0.577854	0.133795	11.5203	0.00163755	12.4	213050	4.11935	1443.17	271.558	1.63755	27319	2203.15	0.0528267
2018	Qingjian County	0.290656	0.0765964	11.517	0.00109872	12.47	244227	4.69687	2561.44	311.377	1.09872	27364	2194.39	0.0936064
2019	Qingjian County	0.459332	0.124943	11.8168	0.00131655	12.56	290166	4.88933	3679.72	326.475	1.31655	27365	2178.74	0.134468
2020	Qingjian County	0.583478	0.132877	11.0694	0.00147169	11.6	272086	5.43819	3758.76	340.989	1.47169	27366	2359.14	0.137351
2021	Qingjian County	0.395251	0.10239	11.6387	0.00161112	10.64	271303	5.98705	3793.54	376.486	1.61112	27367	2572.09	0.138617
2012	Baota District	0.289557	0.0614485	9.38033	0.00176221	46.48	182449	4.37414	947.834	571.738	1.76221	29748	640.017	0.0318621
2013	Baota District	0.310581	0.0617335	10.9949	0.00215993	46.92	216626	4.61573	655.378	609.027	2.15993	32450	691.603	0.0201966
2014	Baota District	0.450413	0.105066	10.2639	0.00177556	46.49	281407	5.23532	777.194	684.449	1.77556	32382	696.537	0.0240008
2015	Baota District	0.46804	0.111907	10.7044	0.00139849	47.23	249721	5.74169	871.234	757.593	1.39849	32431	686.661	0.0268642
2016	Baota District	0.284397	0.10781	10.6469	0.00162032	47.88	286122	5.32853	977.219	717.463	1.62032	32360	675.856	0.0301984
2017	Baota District	0.36088	0.122237	10.8487	0.00158287	49.18	300380	5.92172	1145.46	818.982	1.58287	31201	634.425	0.0367124
2018	Baota District	0.365275	0.122181	10.6668	0.00134245	49.08	344659	6.72323	1313.71	925.056	1.34245	31685	645.579	0.0414614
2019	Baota District	0.463776	0.13956	10.8959	0.00150886	49.71	373232	7.3266	1481.95	1023.37	1.50886	31435	632.368	0.0471433
2020	Baota District	0.547259	0.156939	10.2591	0.00174396	64.1	330878	5.74945	1499.98	1036.39	1.74396	31563	492.403	0.0475235
2021	Baota District	0.520066	0.174318	10.9538	0.00214308	78.49	288524	4.17231	1474.95	1049.41	2.14308	31691	403.758	0.0465415
2012	Zichang City	0.133461	0.0401366	9.08027	0.00167629	28	158537	2.66286	6796.62	311.185	1.67629	31819	1136.39	0.213603
2013	Zichang City	0.192749	0.0730236	10.6385	0.00195208	27	168409	3.78889	4628.34	346.953	1.95208	30370	1124.81	0.152399
2014	Zichang City	0.349875	0.107273	10.0766	0.001502	27	157032	3.44444	5422.35	338.564	1.502	30834	1142	0.175856
2015	Zichang City	0.221399	0.0778152	10.4739	0.00135364	27	182700	2.67481	688.762	301.419	1.35364	31263	1157.89	0.0220312
2016	Zichang City	0.375731	0.0989803	10.2752	0.00160246	26.97	182400	2.77976	6479.14	312.896	1.60246	31521	1168.74	0.20555
2017	Zichang City	0.570023	0.165518	10.5262	0.00165109	22.1	200066	4.39774	7283.28	405.634	1.65109	31567	1428.37	0.230724
2018	Zichang City	0.56667	0.217654	10.3593	0.00130056	22.07	236101	5.19147	8087.42	478.196	1.30056	31651	1434.12	0.255518
2019	Zichang City	0.64477	0.209423	10.5699	0.00148309	21.94	269800	5.62215	8891.55	463.543	1.48309	32518	1482.13	0.273435
2020	Zichang City	0.684159	0.185912	9.99816	0.00148235	21.77	237243	4.59412	8641.31	417.421	1.48235	32674	1500.87	0.264471
2021	Zichang City	0.853249	0.215249	10.8172	0.00150827	21.6	286061	3.5661	8139.24	566.23	1.50827	32830	1519.91	0.247921
2012	Yanchuan County	0.199544	0.0868531	10.058	0.0015401	20	131695	4.119	5193.89	415.222	1.5401	32986	1649.3	0.157457
2013	Yanchuan County	0.212869	0.0716483	11.683	0.00203262	20	139296	4.728	3584.28	476.613	2.03262	24838	1241.9	0.144306
2014	Yanchuan County	0.397763	0.118359	11.0721	0.00158627	20	181568	5.85	4257.32	517.942	1.58627	24805	1240.25	0.171632
2015	Yanchuan County	0.327237	0.0998291	11.5449	0.00132435	19	188311	3.77368	4814.28	354.861	1.32435	24805	1305.53	0.194085
2016	Yanchuan County	0.424265	0.127316	11.4067	0.00140619	19.08	191282	3.56977	5345.57	343.123	1.40619	24138	1265.09	0.221459
2017	Yanchuan County	0.44557	0.168829	11.6165	0.00153222	17.18	196104	4.69441	3857.42	406.297	1.53222	23684	1378.58	0.16287
2018	Yanchuan County	0.582512	0.171458	11.5944	0.00107426	17.15	265055	6.66798	2369.27	576.099	1.07426	22818	1330.5	0.103833
2019	Yanchuan County	0.626934	0.161373	11.8036	0.0013777	17.01	261503	5.8458	881.117	500.942	1.3777	23524	1382.95	0.0374561
2020	Yanchuan County	0.687511	0.183169	11.0598	0.00166613	13.97	272134	7.28561	8162.16	512.746	1.66613	23473	1680.24	0.347725
2021	Yanchuan County	0.766973	0.222138	11.6437	0.00190282	10.93	230157	8.72543	84.2367	599.358	1.90282	23422	2142.91	0.00359648
2012	Yanchang County	0.299978	0.101224	10.0715	0.00158589	16	103868	2.13625	448.137	143.961	1.58589	23371	1460.69	0.0191749
2013	Yanchang County	0.308893	0.0625957	11.6894	0.00228863	16	117890	2.35437	2831.27	159.079	2.28863	16510	1031.88	0.171488
2014	Yanchang County	0.471801	0.122032	10.9966	0.00175658	15	136330	2.73933	342.862	173.522	1.75658	16530	1102	0.0207418
2015	Yanchang County	0.420586	0.125395	11.5233	0.00128124	16	137408	2.6875	3837.19	181.588	1.28124	16570	1035.62	0.231575
2016	Yanchang County	0.379474	0.134416	11.4429	0.00151719	15.6	153477	2.42436	4297.63	159.713	1.51719	16570	1062.18	0.259362
2017	Yanchang County	0.431808	0.135798	11.6262	0.00147324	12.86	196096	3.57625	5078.95	194.215	1.47324	14867	1156.07	0.341626
2018	Yanchang County	0.48699	0.127176	11.6002	0.00117084	12.85	211222	4.28397	5860.28	228.37	1.17084	14715	1145.14	0.398252
2019	Yanchang County	0.526114	0.115674	11.8098	0.00136876	12.79	213262	4.1337	6641.6	223.269	1.36876	14648	1145.27	0.453413
2020	Yanchang County	0.627853	0.104172	11.0717	0.00178422	11.8	212126	4.58136	671.537	228.294	1.78422	14635	1240.25	0.0458857
2021	Yanchang County	0.739763	0.100882	11.5652	0.00231623	10.81	213126	5.02901	6583.94	289.248	2.31623	14622	1352.64	0.450276
2012	Ansai District	0.161837	0.0371714	8.50387	0.00182013	19	173037	5.56579	875.397	358.596	1.82013	14609	768.895	0.0599218
2013	Ansai District	0.236566	0.0681459	10.0658	0.00209764	19	197082	5.49526	583.828	353.747	2.09764	27200	1431.58	0.0214643
2014	Ansai District	0.403377	0.127044	9.39682	0.0016164	19	209096	5.62153	685.419	360.936	1.6164	27200	1431.58	0.0251992
2015	Ansai District	0.398873	0.117035	9.77767	0.00141606	20	243080	4.855	7487.11	329.264	1.41606	27200	1360	0.275262
2016	Ansai District	0.407476	0.132093	9.71761	0.00154189	19.7	208527	3.89188	873.995	259.898	1.54189	27260	1383.76	0.0320615
2017	Ansai District	0.457945	0.153828	9.88274	0.00162247	17.79	234000	5.13297	4674.61	309.596	1.62247	27260	1532.32	0.171482
2018	Ansai District	0.531932	0.118241	9.60555	0.00140564	17.78	200021	6.33712	8475.22	363.581	1.40564	37243	2094.66	0.227565
2019	Ansai District	0.644308	0.175661	9.8637	0.0016428	17.76	230403	6.45445	12275.8	388.711	1.6428	39642	2232.09	0.309667
2020	Ansai District	0.768951	0.177537	9.34856	0.00155836	16.31	260931	6.82166	1241.34	377.282	1.55836	39622	2429.31	0.0313295
2021	Ansai District	0.896177	0.1845	10.1322	0.0016783	14.86	266937	7.18888	12181.5	494.13	1.6783	39602	2665.01	0.307598
2012	Zhidan County	0.267762	0.0839399	8.05747	0.00178556	16	235356	1.99875	2542.27	463.838	1.78556	39582	2473.88	0.064228
2013	Zhidan County	0.278404	0.0769144	9.57137	0.00219999	16	265512	1.49313	1754.85	442.514	2.19999	21200	1325	0.0827759
2014	Zhidan County	0.412383	0.138408	8.85279	0.00168309	16	283425	1.41375	293.562	439.167	1.68309	21197	1324.81	0.0138492
2015	Zhidan County	0.427458	0.109762	9.21072	0.0014253	16	275173	8.38375	2363.34	354.774	1.4253	24417	1526.06	0.0967909
2016	Zhidan County	0.385001	0.113386	9.26205	0.00146875	16.09	218000	6.68676	2398.13	284.554	1.46875	27547	1712.06	0.0870559
2017	Zhidan County	0.495352	0.173021	9.36679	0.00163225	14.71	211442	9.47886	2797.27	350.527	1.63225	30187	2052.14	0.0926648
2018	Zhidan County	0.639987	0.190483	9.04626	0.00162637	14.69	190700	1.29666	3196.42	395.308	1.62637	30225	2057.52	0.105754
2019	Zhidan County	0.640015	0.154632	9.30379	0.0015709	14.58	273895	11.8385	3595.56	425.809	1.5709	31381	2152.33	0.114578
2020	Zhidan County	0.698983	0.135194	8.78721	0.00159663	15.51	274968	9.13475	3624.92	373.404	1.59663	31394	2024.11	0.115465
2021	Zhidan County	0.790131	0.139105	9.55745	0.00171277	16.44	269247	6.43101	3548.17	517.695	1.71277	31407	1910.4	0.112974
2012	Wuqi County	0.173978	0.0529157	7.67131	0.00162446	14	283187	14.3621	6315.17	530.668	1.62446	31420	2244.29	0.200992
2013	Wuqi County	0.22013	0.0513451	9.10656	0.00206526	14	333299	14.9786	434.782	553.444	2.06526	24520	1751.43	0.0177317
2014	Wuqi County	0.452741	0.151723	8.3971	0.00158935	14	371574	15.1786	5162.39	558.221	1.58935	24881	1777.21	0.207483
2015	Wuqi County	0.410249	0.105648	8.68968	0.0014036	14	316301	1.33571	5771.29	370.731	1.4036	25066	1790.43	0.230244
2016	Wuqi County	0.425987	0.093884	8.79873	0.00123933	14.49	248158	7.49827	6241.67	286.751	1.23933	25327	1747.9	0.246443
2017	Wuqi County	0.619239	0.174269	8.84291	0.00161341	15.21	243006	8.89893	7220.48	357.286	1.61341	25320	1664.69	0.285169
2018	Wuqi County	0.712353	0.236938	8.62441	0.00161175	15.2	220005	9.91234	8199.3	397.75	1.61175	25652	1687.63	0.319636
2019	Wuqi County	0.768619	0.214464	8.81927	0.00141774	15.26	283982	11.7126	9178.12	471.822	1.41774	26340	1726.08	0.348448
2020	Wuqi County	0.779542	0.237945	8.24583	0.00140631	14.62	331822	1.26897	9261.71	396.337	1.40631	26610	1820.11	0.348054
2021	Wuqi County	0.735609	0.164203	9.16068	0.00137653	13.98	332593	9.17463	972.928	555.668	1.37653	26880	1922.75	0.0361952
2012	Ganquan County	0.158969	0.05311	9.06838	0.00183302	9	76656	2.27778	2391.48	90.2289	1.83302	27150	3016.67	0.0880841
2013	Ganquan County	0.209947	0.0654951	10.6374	0.00211678	9	89377	2.36667	1665.35	93.75	2.11678	9586	1065.11	0.173727
2014	Ganquan County	0.355719	0.133319	9.84833	0.00190699	9	91394	2.49333	1844.75	98.7676	1.90699	9558	1062	0.193006
2015	Ganquan County	0.431941	0.125885	10.2421	0.00149689	9	100134	2.42222	1922.92	95.1585	1.49689	6110	678.889	0.314716
2016	Ganquan County	0.379421	0.125263	10.273	0.0016684	8.95	105458	2.29944	2264.66	90.581	1.6684	6006	671.061	0.377066
2017	Ganquan County	0.485234	0.143668	10.4199	0.0016559	7.97	112724	2.93614	2620.87	102.993	1.6559	6023	755.709	0.435143
2018	Ganquan County	0.568194	0.139049	10.0753	0.00160387	7.95	69260	3.35268	2977.07	117.314	1.60387	6013	756.352	0.495106
2019	Ganquan County	0.647301	0.124301	10.4031	0.00171063	7.91	139003	3.67598	3333.28	127.98	1.71063	6012	760.051	0.554438
2020	Ganquan County	0.700804	0.128255	9.88786	0.00180518	7.69	150715	3.75313	3332.28	126.936	1.80518	6005	780.884	0.554918
2021	Ganquan County	0.763261	0.151309	10.5124	0.00226168	7.47	139193	3.83028	3233.77	145.551	2.26168	5998	802.945	0.539141
2012	Luochuan County	0.163188	0.0430896	9.84516	0.00164686	22	127912	9.68364	1134.98	1188.84	1.64686	5991	272.318	0.189448
2013	Luochuan County	0.203699	0.0364061	11.4679	0.00182135	23	152218	1.75391	778.785	1380.25	1.82135	11237	488.565	0.0693054
2014	Luochuan County	0.303783	0.0615183	10.6274	0.00191398	22	140935	1.43	926.567	1280.36	1.91398	10657	484.409	0.0869444
2015	Luochuan County	0.299126	0.0907529	11.0043	0.00133565	22	174179	8.44	134.657	1035.04	1.33565	10471	475.955	0.01286
2016	Luochuan County	0.258513	0.0867517	11.0606	0.00180664	22.52	103771	6.73757	115.888	846.708	1.80664	10286	456.75	0.0112666
2017	Luochuan County	0.337464	0.109777	11.1621	0.00148992	23.06	226749	6.49523	656.901	835.826	1.48992	10138	439.636	0.0647959
2018	Luochuan County	0.4111	0.135326	10.8627	0.00155546	23.01	198031	1.63482	1197.91	1361.53	1.55546	9885	429.596	0.121185
2019	Luochuan County	0.56294	0.176219	11.1379	0.00145626	22.82	203864	1.6869	1738.93	1360.9	1.45626	10195	446.757	0.170567
2020	Luochuan County	0.753	0.217112	10.6065	0.0017992	20.17	185779	11.9825	1761.43	1348.45	1.7992	10274	509.37	0.171446
2021	Luochuan County	0.912543	0.258005	11.0551	0.00260586	17.52	188481	22.2782	1732.37	1557.19	2.60586	10353	590.925	0.16733
2012	Fu County	0.260828	0.0979178	9.2834	0.00189337	16	100397	1.8825	2886.82	72.0574	1.89337	10432	652	0.276728
2013	Fu County	0.247298	0.063219	10.8643	0.00207656	16	115300	2.3625	1979.77	77.7273	2.07656	9847	615.438	0.201054
2014	Fu County	0.334928	0.0926274	10.0368	0.00196202	15	114500	2.59667	2364.24	93.1818	1.96202	9864	657.6	0.239684
2015	Fu County	0.363927	0.105586	10.3906	0.00150514	16	137700	2.55938	2661.48	97.9665	1.50514	9864	616.5	0.269818
2016	Fu County	0.391018	0.12157	10.5014	0.00173866	15.88	144300	2.81549	2859.67	106.962	1.73866	9895	623.111	0.289001
2017	Fu County	0.509485	0.177327	10.6015	0.00162522	15.76	155060	3.35723	3362.24	126.579	1.62522	9999	634.454	0.336258
2018	Fu County	0.592379	0.193402	10.1845	0.00173094	15.74	170980	3.98284	3864.82	149.947	1.73094	10054	638.755	0.384406
2019	Fu County	0.615892	0.167818	10.5178	0.00165866	15.68	180202	4.23279	4367.39	158.78	1.65866	10054	641.199	0.434393
2020	Fu County	0.726521	0.142234	10.0459	0.00190106	14.29	180521	5.64416	4442.62	173.135	1.90106	10054	703.569	0.441876
2021	Fu County	0.780608	0.11665	10.5523	0.00248806	12.9	177288	7.05553	4387.67	198.87	2.48806	10054	779.38	0.436411
2012	Huangling County	0.194795	0.053639	9.504	0.002076	13	150580	7.95385	2419.77	452.121	2.076	10054	773.385	0.240678
2013	Huangling County	0.210141	0.0722188	11.1259	0.00199032	13	156013	8.34846	1662.95	474.552	1.99032	8938	687.538	0.186054
2014	Huangling County	0.40817	0.110882	10.2448	0.00198873	13	127301	8.56615	1982.9	486.926	1.98873	8945	688.077	0.221677
2015	Huangling County	0.363537	0.0880059	10.5478	0.00160843	13	145943	6.63769	2242.29	376.913	1.60843	9774	751.846	0.229414
2016	Huangling County	0.351318	0.0882286	10.7936	0.00177955	12.66	155417	7.57316	2498.46	419.064	1.77955	9619	759.795	0.259743
2017	Huangling County	0.34815	0.0890823	10.815	0.00163749	13.23	214950	9.56689	3493.15	523.918	1.63749	9241	698.488	0.378005
2018	Huangling County	0.544901	0.105553	10.3834	0.00174642	13.19	252735	11.5548	4487.83	666.409	1.74642	8971	680.136	0.50026
2019	Huangling County	0.536227	0.0882766	10.6714	0.00165045	13.04	259155	14.2585	5482.52	812.965	1.65045	9262	710.276	0.591937
2020	Huangling County	0.599136	0.0842218	10.342	0.00195637	12.7	251748	13.3796	5551.62	739.005	1.95637	9128	718.74	0.608197
2021	Huangling County	0.646059	0.131082	10.7372	0.00274409	12.36	307538	12.5006	5458.15	38.7407	2.74409	8994	727.67	0.606866
2012	Huanglong County	0.297915	0.11035	9.14906	0.00194868	5	73906	2.32	1468.77	36.9993	1.94868	11865	2373	0.12379
2013	Huanglong County	0.437448	0.167632	10.8144	0.00212136	5	94321	2.222	11.5789	40.4588	2.12136	11891	2378.2	0.00097375
2014	Huanglong County	0.544408	0.203246	9.86921	0.00232114	5	99232	2.654	127.963	48.3248	2.32114	12050	2410	0.0106194
2015	Huanglong County	0.704966	0.252897	10.1758	0.00174887	5	100810	2.792	1362.82	50.8376	1.74887	11950	2390	0.114043
2016	Huanglong County	0.638135	0.254124	10.3062	0.00227029	5.02	93137	3.71713	1362.66	56.1544	2.27029	11756	2341.83	0.115912
2017	Huanglong County	0.368757	0.160462	10.4184	0.00190956	5.02	103664	3.39243	983.62	62.0175	1.90956	11611	2312.95	0.0847145
2018	Huanglong County	0.557457	0.179978	10.1321	0.00183976	5	119594	3.7338	604.576	67.9614	1.83976	11460	2292	0.0527553
2019	Huanglong County	0.430799	0.204216	10.4699	0.00180307	4.92	147445	3.96953	225.531	71.0961	1.80307	11028	2241.46	0.0204508
2020	Huanglong County	0.439957	0.174287	10.0301	0.00213673	4.12	149702	5.46951	249.792	82.0328	2.13673	10596	2571.84	0.0235741
2021	Huanglong County	0.4408	0.135255	10.4813	0.00302311	3.32	154439	6.9695	214.539	67.6374	3.02311	10164	3061.45	0.0211078
2012	Yichuan County	0.244928	0.0509115	9.6499	0.00178795	12	100650	1.73167	229.643	70.8248	1.78795	11854	987.833	0.0193727
2013	Yichuan County	0.268888	0.0569742	11.2824	0.00226985	12	113693	1.89333	1516.48	77.4369	2.26985	11807	983.917	0.128439
2014	Yichuan County	0.270799	0.0579667	10.4654	0.00202379	12	105068	2.11	188.366	86.2986	2.02379	14851	1237.58	0.0126837
2015	Yichuan County	0.291792	0.064051	10.9717	0.00135665	12	115119	2.32667	1985.26	95.0306	1.35665	14669	1222.42	0.135337
2016	Yichuan County	0.0709796	0.0277553	10.9995	0.00182232	12.48	138806	2.42949	217.712	103.199	1.82232	14683	1176.52	0.0148275
2017	Yichuan County	0.233839	0.0678734	11.1279	0.00155274	12.24	148216	2.96244	1227.8	123.418	1.55274	14923	1219.2	0.0822756
2018	Yichuan County	0.384575	0.118759	11.0544	0.00134111	12.23	172589	3.89375	2237.89	128.601	1.34111	14923	1220.2	0.149962
2019	Yichuan County	0.518129	0.169644	11.3426	0.00148261	12.15	167398	3.49823	3247.97	144.331	1.48261	14917	1227.74	0.217736
2020	Yichuan County	0.6249	0.210113	10.5604	0.00197463	11.21	172239	4.65433	3283.42	155.117	1.97463	14911	1330.15	0.220201
2021	Yichuan County	0.726972	0.248753	10.9717	0.00270584	10.27	172856	5.81042	3222.74	72.315	2.70584	14905	1451.31	0.216219
2012	Yijun County	0.0772456	0.0150637	10.0156	0.00182409	9	82938	2.87111	4899.48	168.779	1.82409	19134	2126	0.256061
2013	Yijun County	0.138101	0.037863	11.6586	0.00192959	9	96939	3.28222	5492.62	192.946	1.92959	19132	2125.78	0.287091
2014	Yijun County	0.288853	0.0692275	10.8364	0.00203687	9.29	96980	3.51615	585.847	212.476	2.03687	19302	2077.72	0.0303516
2015	Yijun County	0.30771	0.0895293	11.0747	0.00164935	9	106145	3.67889	5978.19	216.123	1.64935	19451	2161.22	0.307346
2016	Yijun County	0.382118	0.135152	11.4027	0.00172421	9.25	116769	4.11351	6239.15	248.368	1.72421	20681	2235.78	0.301685
2017	Yijun County	0.428364	0.128765	11.3297	0.00173969	9.21	143011	3.31846	6951.42	199.497	1.73969	21987	2387.3	0.316161
2018	Yijun County	0.553531	0.171821	11.0262	0.00159689	9.01	153094	3.6833	7663.69	216.622	1.59689	22987	2551.28	0.333393
2019	Yijun County	0.653535	0.173324	11.2498	0.00168953	8.64	163818	4.17642	8375.97	244.451	1.68953	25137	2909.37	0.333213
2020	Yijun County	0.755693	0.224193	10.8759	0.00199251	7.2	162353	5.93611	8781.35	289.566	1.99251	27287	3789.86	0.321814
2021	Yijun County	0.891086	0.275062	11.2367	0.00282971	5.76	147495	7.69581	9126.89	864.228	2.82971	29437	5110.59	0.310048
2012	Yaozhou District	0.306968	0.0401828	10.7369	0.0018231	32	186149	4.39719	342.115	911.925	1.8231	32624	1019.5	0.0104866
2013	Yaozhou District	0.378272	0.051241	12.4437	0.00174124	33	209960	4.57	3775.93	934.201	1.74124	32335	979.848	0.116775
2014	Yaozhou District	0.51967	0.0998121	11.5949	0.00193695	33.01	234651	4.35597	4534.48	880.483	1.93695	32154	974.069	0.141024
2015	Yaozhou District	0.501669	0.0700545	11.6261	0.00167529	34	273227	3.75	5224.49	794.888	1.67529	32040	942.353	0.163062
2016	Yaozhou District	0.401553	0.0956616	12.0884	0.00153163	33.9	274421	4.36195	5966.4	910.1	1.53163	31815	938.496	0.187534
2017	Yaozhou District	0.320655	0.105093	11.8907	0.00187493	23.75	330810	5.61638	4260.21	831.602	1.87493	31644	1332.38	0.134629
2018	Yaozhou District	0.307491	0.110213	11.6822	0.00162863	23.61	355292	7.48316	2554.02	1090.46	1.62863	31690	1342.23	0.080594
2019	Yaozhou District	0.430831	0.148678	11.7122	0.00177649	22.74	371942	8.34458	847.838	1183.02	1.77649	28415	1249.56	0.0298377
2020	Yaozhou District	0.532226	0.187142	11.4749	0.00195613	18.4	370943	11.7437	84.7253	1347.16	1.95613	25140	1366.3	0.00337014
2021	Yaozhou District	0.637042	0.225607	11.7776	0.00277591	14.06	330615	15.1428	8693.59	397.52	2.77591	21865	1555.12	0.397603
2012	Wangyi District	0.228409	0.0326703	11.2619	0.00151022	20.63	86992	3.54678	3955.72	4511.1	1.51022	3891	188.609	1.01663
2013	Wangyi District	0.324876	0.0658655	13.0013	0.00147748	20.57	93785	3.99417	4432.18	5065.35	1.47748	3938	191.444	1.12549
2014	Wangyi District	0.428263	0.134314	12.1658	0.00180054	20	96420	4.194	4655.33	5171.39	1.80054	3977	198.85	1.17056
2015	Wangyi District	0.467087	0.119001	12.1627	0.0015521	19.8	97423	4.43131	483.453	5409.37	1.5521	3988	201.414	0.121227
2016	Wangyi District	0.385836	0.128389	12.738	0.00129516	19.62	119617	5.18563	54.4463	6179.41	1.29516	5333	271.814	0.0102093
2017	Wangyi District	0.405987	0.176143	12.4497	0.00177549	19.54	147863	4.46469	2310.12	5378.55	1.77549	5327	272.62	0.433662
2018	Wangyi District	0.437691	0.195781	12.2764	0.00138462	17.45	151219	4.86745	4565.79	5229.35	1.38462	5300	303.725	0.86147
2019	Wangyi District	0.488339	0.214367	12.3169	0.0015917	16.73	156979	5.54393	6821.46	5718.25	1.5917	5285	315.9	1.29072
2020	Wangyi District	0.554499	0.232953	11.9275	0.0018531	13.5	163192	7.45778	7189.85	6207.15	1.8531	5270	390.37	1.3643
2021	Wangyi District	0.612975	0.25154	12.2861	0.00254214	10.27	169405	9.37162	7512.13	4316.89	2.54214	5255	511.685	1.42952
2012	Yintai District	0.293384	0.0748439	10.8543	0.00165539	22.62	96232	3.63665	1546.47	1306.67	1.65539	8924	394.518	0.173294
2013	Yintai District	0.528288	0.149981	12.5531	0.00168319	22.47	96498	3.46862	172.616	1238.05	1.68319	9269	412.506	0.018623
2014	Yintai District	0.530146	0.155885	11.7209	0.00193305	21.76	101861	3.34467	1134.69	1048.86	1.93305	9208	423.162	0.123228
2015	Yintai District	0.480005	0.0938893	11.7849	0.00166014	21.2	113027	2.98396	1139.82	1004.86	1.66014	9223	435.047	0.123585
2016	Yintai District	0.274344	0.108129	12.2997	0.00150163	20.78	142041	3.96246	119.434	1022.02	1.50163	9333	449.134	0.0127969
2017	Yintai District	0.297268	0.128515	12.0788	0.00184893	20.95	151612	3.66348	592.749	1219.14	1.84893	9550	455.847	0.0620679
2018	Yintai District	0.37995	0.133646	11.8704	0.00149833	18.95	169218	3.25858	1066.06	980.875	1.49833	9435	497.889	0.11299
2019	Yintai District	0.326104	0.0991053	11.9765	0.0016827	18.12	177557	3.48565	1539.38	1003.27	1.6827	9456	521.854	0.162794
2020	Yintai District	0.357057	0.120767	11.5525	0.0019837	13.4	191025	4.81866	164.341	1025.67	1.9837	9477	707.239	0.0173411
2021	Yintai District	0.373414	0.1087	11.9367	0.00269323	8.68	204493	6.15166	1657.65	881.596	2.69323	9498	1094.24	0.174526
2012	Baishui County	0.181433	0.0496294	11.9692	0.00131832	30	140294	2.43333	546.555	637.604	1.31832	28577	952.567	0.0191257
2013	Baishui County	0.239197	0.0597269	13.7219	0.00152581	28	152612	2.36786	5472.27	690.625	1.52581	28704	1025.14	0.190645
2014	Baishui County	0.339837	0.0641459	12.8349	0.00178772	29	167935	2.12269	5648.24	641.042	1.78772	28718	990.276	0.19668
2015	Baishui County	0.370815	0.0728404	12.982	0.0013644	29	188745	2.17138	5629.96	655.938	1.3644	28735	990.862	0.195927
2016	Baishui County	0.39973	0.0691443	13.3864	0.00137457	28.66	207690	2.52237	572.515	752.396	1.37457	26165	912.945	0.021881
2017	Baishui County	0.456683	0.0628637	13.2498	0.00162705	28.4	230500	2.72878	671.632	807.264	1.62705	26387	929.12	0.0254531
2018	Baishui County	0.576348	0.0726437	13.2251	0.00127771	27.96	252091	3.23938	770.749	864.271	1.27771	26112	933.906	0.029517
2019	Baishui County	0.644388	0.0680326	13.282	0.00140221	27.59	258462	3.49879	869.866	860.37	1.40221	25985	941.827	0.0334757
2020	Baishui County	0.722174	0.0744175	12.8281	0.00170464	22.38	252678	4.18623	871.766	957.906	1.70464	25858	1155.41	0.0337136
2021	Baishui County	0.824416	0.077774	13.1648	0.00246941	17.17	219978	4.87367	8657.47	788.037	2.46941	25731	1498.6	0.336461
2012	Chengcheng County	0.0750283	0.0162075	12.2893	0.00123498	40	166968	2.7525	6231.37	740.5	1.23498	45504	1137.6	0.136941
2013	Chengcheng County	0.117075	0.0307896	14.1385	0.00132028	41	183596	2.82439	5912.13	760.839	1.32028	46307	1129.44	0.127672
2014	Chengcheng County	0.191838	0.0467419	13.162	0.00172376	40	200369	2.565	5995.82	733.809	1.72376	46925	1173.12	0.127774
2015	Chengcheng County	0.206607	0.0538438	13.2113	0.00140032	39	236656	2.26667	5852.44	705.085	1.40032	46655	1196.28	0.125441
2016	Chengcheng County	0.259358	0.0612168	13.5942	0.00136499	39.34	239836	2.17819	5781.32	764.407	1.36499	46884	1191.76	0.123311
2017	Chengcheng County	0.32434	0.0756751	13.5168	0.00158637	39.32	289858	2.23413	6786.97	783.638	1.58637	47193	1200.23	0.143813
2018	Chengcheng County	0.552691	0.145528	13.514	0.00124387	37.91	309306	2.59885	7792.62	878.621	1.24387	48127	1269.51	0.161918
2019	Chengcheng County	0.696157	0.195104	13.6645	0.00132811	37.31	318836	2.77518	8798.27	923.657	1.32811	47998	1286.46	0.183305
2020	Chengcheng County	0.830822	0.232518	13.0523	0.00161184	30.41	305696	3.73972	896.551	1013.59	1.61184	47869	1574.12	0.0187293
2021	Chengcheng County	0.966233	0.273752	13.3914	0.00256993	23.51	295568	4.70426	8982.97	2078.61	2.56993	47740	2030.63	0.188164
2012	Hancheng City	0.217657	0.0505831	11.3636	0.0016034	40	211518	7.515	6573.52	1740.04	1.6034	26882	672.05	0.244532
2013	Hancheng City	0.275818	0.0631633	13.2141	0.00177254	40	280945	7.57525	655.188	1869.28	1.77254	27240	681	0.0240524
2014	Hancheng City	0.344091	0.0863544	12.3418	0.00208733	40	307921	7.78225	853.858	1920.36	2.08733	25305	632.625	0.0337426
2015	Hancheng City	0.426651	0.108074	12.5528	0.00158484	40	344626	8.95	8346.23	1976.43	1.58484	23370	584.25	0.357134
2016	Hancheng City	0.459699	0.103455	12.85	0.00184455	40.15	386603	8.69244	8373.16	2152.99	1.84455	24709	615.417	0.338871
2017	Hancheng City	0.498068	0.103388	12.8822	0.00161613	40.06	483984	9.21136	9840.22	2276.34	1.61613	24573	613.405	0.400449
2018	Hancheng City	0.595646	0.0942304	12.8185	0.0014472	39.94	552655	8.89669	11307.3	2170.61	1.4472	24408	611.117	0.463262
2019	Hancheng City	0.661147	0.100037	13.1306	0.00150249	39.46	553084	8.57679	12774.4	2087.85	1.50249	24089	610.466	0.530298
2020	Hancheng City	0.732481	0.1037	12.425	0.00192676	38.31	540631	9.77632	1295.51	2310.42	1.92676	23770	620.465	0.054502
2021	Hancheng City	0.793712	0.107517	12.748	0.0029174	37.16	475529	10.9759	12834.7	535.719	2.9174	23451	631.082	0.547297
2012	Heyang County	0.259864	0.0691462	12.8533	0.0011885	45	169800	13355.6	32375.7	352.749	1.1885	27766	617.022	1.16602
2013	Heyang County	0.231075	0.0539976	14.7801	0.00117666	46	192000	1.475	32524.8	418.232	1.17666	58383	1269.2	0.557093
2014	Heyang County	0.248725	0.0468302	13.8177	0.001686	46	211500	1.55196	33437.7	472.164	1.686	58628	1274.52	0.570336
2015	Heyang County	0.345809	0.0802199	13.7641	0.00148411	45	233900	1.67356	33304.7	496.799	1.48411	58395	1297.67	0.570335
2016	Heyang County	0.371963	0.0907573	14.216	0.00134537	45.29	253000	1.73261	33260	524.078	1.34537	58535	1292.45	0.568207
2017	Heyang County	0.40019	0.0960687	14.1655	0.00153285	44.41	285100	2.08174	37812.9	546.068	1.53285	58324	1313.31	0.648325
2018	Heyang County	0.555344	0.128158	14.1319	0.00120108	44.32	327600	2.19269	43377.7	643.354	1.20108	58406	1317.82	0.742692
2019	Heyang County	0.587327	0.123221	14.3602	0.00128657	43.91	353600	2.39071	50013.3	676.27	1.28657	58580	1334.09	0.85376
2020	Heyang County	0.685775	0.142761	13.76	0.00154115	36.07	346800	3.13192	50393	730.523	1.54115	58402	1619.13	0.862865
2021	Heyang County	0.747579	0.158507	14.0212	0.00267554	35.46	345689	3.24679	49983.3	786.139	2.67554	58224	1641.96	0.858465
2012	Xunyi County	0.241406	0.0649495	9.51527	0.00196977	29	132368	3.5269	1372.12	564.771	1.96977	58046	2001.59	0.0236384
2013	Xunyi County	0.301998	0.0817451	11.1604	0.00173351	30	142504	3.86733	144.948	640.641	1.73351	27767	925.567	0.00522015
2014	Xunyi County	0.274492	0.0523211	10.2576	0.00193832	29	145102	3.61834	119.118	579.365	1.93832	27678	954.414	0.0043037
2015	Xunyi County	0.29804	0.0734978	10.4501	0.00162516	29	153941	3.6769	1917.29	601.071	1.62516	27752	956.966	0.0690865
2016	Xunyi County	0.366631	0.117892	10.7616	0.00165151	29.56	188731	4.12788	1814.48	687.824	1.65151	27816	941.001	0.0652314
2017	Xunyi County	0.469663	0.167412	10.6196	0.00179519	26.71	203568	3.61646	5432.16	533.322	1.79519	27786	1040.28	0.1955
2018	Xunyi County	0.398316	0.158826	10.3687	0.00178456	26.79	238014	3.29925	9049.85	488.056	1.78456	27786	1037.18	0.325698
2019	Xunyi County	0.463517	0.16615	10.4433	0.00175902	26.87	243141	3.32595	12667.5	492.601	1.75902	27786	1034.09	0.455896
2020	Xunyi County	0.59244	0.171451	10.3257	0.00195017	21.19	260770	4.99956	12319.4	584.925	1.95017	27786	1311.28	0.443366
2021	Xunyi County	0.76619	0.176752	10.6569	0.00277918	15.51	252963	6.67317	11389.7	246.383	2.77918	27786	1791.49	0.409909
2012	Changwu County	0.141698	0.0362195	10.9223	0.00168342	19	90846	2.76737	7813.4	927.337	1.68342	11058	582	0.706583
2013	Changwu County	0.122421	0.0303034	12.6855	0.0015745	19	110669	3.19	7854.2	1068.96	1.5745	11223	590.684	0.699831
2014	Changwu County	0.339062	0.123942	11.8067	0.00184167	19	110419	3.62263	8929.76	1213.93	1.84167	11666	614	0.765452
2015	Changwu County	0.350744	0.126589	12.1268	0.00138392	19	124968	3.84215	8787.73	1287.48	1.38392	11708	616.211	0.750575
2016	Changwu County	0.329439	0.0904216	12.405	0.00150333	18.78	147557	5.17561	85.8995	1688.73	1.50333	11775	626.997	0.00729507
2017	Changwu County	0.437382	0.103196	12.0487	0.00164579	17.16	171679	5.85431	552.481	1768.66	1.64579	11831	689.452	0.0466977
2018	Changwu County	0.474712	0.100866	11.9236	0.00170597	17.24	196148	5.93684	1019.06	1800.09	1.70597	11909	690.777	0.0855707
2019	Changwu County	0.584068	0.134038	11.904	0.00160329	17.68	212613	5.68317	1485.64	1745.6	1.60329	12021	679.921	0.123587
2020	Changwu County	0.717936	0.168074	11.6421	0.0021687	14.84	207342	7.97346	1456.53	2083.1	2.1687	12133	817.588	0.120047
2021	Changwu County	0.876895	0.217182	11.9108	0.00249136	12	225500	10.2637	9928.47	613.908	2.49136	12245	1020.42	0.810818
2012	Yongshou County	0.281061	0.0997936	11.2401	0.00166461	21	101489	1.96895	1345.35	464.904	1.66461	19256	916.952	0.0698667
2013	Yongshou County	0.226114	0.0545566	12.9697	0.00162056	21	115710	2.13476	138.38	504.274	1.62056	19553	931.095	0.00707717
2014	Yongshou County	0.282213	0.104237	12.1384	0.00184919	21	117655	2.38952	13496.9	562.43	1.84919	20402	971.524	0.661547
2015	Yongshou County	0.34056	0.103659	12.2486	0.00154484	21	123377	2.79952	13354.7	659.28	1.54484	20405	971.667	0.654483
2016	Yongshou County	0.278353	0.0651948	12.7418	0.00144884	20.81	137251	3.51321	12937.6	822.385	1.44884	20472	983.758	0.631967
2017	Yongshou County	0.366261	0.0673767	12.4203	0.00183446	18.85	164400	4.53187	13790.3	960.919	1.83446	20538	1089.55	0.671452
2018	Yongshou County	0.454275	0.0916485	12.0928	0.00181498	18.93	188681	4.45626	14642.9	948.898	1.81498	20546	1085.37	0.71269
2019	Yongshou County	0.519043	0.107936	12.0722	0.00175702	19.01	196864	4.4515	15495.6	951.89	1.75702	20555	1081.27	0.753859
2020	Yongshou County	0.647042	0.124224	12.0137	0.00207931	16.02	201763	5.94745	15393	1064.05	2.07931	20564	1283.65	0.74854
2021	Yongshou County	0.735637	0.140511	12.253	0.00264274	13.03	190750	7.44339	14556.5	1531.83	2.64274	20573	1578.89	0.707555
2012	Binzhou City	0.0729027	0.035893	10.6342	0.00169849	36	209539	4.59528	26421.1	1398.39	1.69849	30551	848.639	0.864821
2013	Binzhou City	0.204666	0.0522536	12.3819	0.00149969	36	231363	5.16917	26485.6	1575.7	1.49969	31169	865.806	0.849743
2014	Binzhou City	0.388837	0.118768	11.4762	0.00184338	37	210943	4.59486	27816.3	1434.68	1.84338	31283	845.486	0.889181
2015	Binzhou City	0.430446	0.126089	11.7621	0.00139646	37	224096	5.13243	26671.7	1594.76	1.39646	31430	849.459	0.848607
2016	Binzhou City	0.466903	0.139549	12.0738	0.0014614	36.56	244665	5.843	26859.6	1804.22	1.4614	31583	863.868	0.850444
2017	Binzhou City	0.595116	0.189016	11.7619	0.0016881	32.99	233126	6.58126	31759	1833.73	1.6881	31755	962.564	1.00012
2018	Binzhou City	0.64108	0.211137	11.577	0.00168057	33.27	264896	6.94629	36658.4	1951.88	1.68057	31930	959.723	1.14809
2019	Binzhou City	0.747735	0.226293	11.5463	0.00164062	32.16	277739	6.72864	41557.8	1825.53	1.64062	32049	996.549	1.29669
2020	Binzhou City	0.835244	0.241449	11.301	0.00207838	30.02	259746	8.99928	43685.1	2281.74	2.07838	32168	1071.55	1.35803
2021	Binzhou City	0.962513	0.256605	11.6005	0.00256294	27.88	281904	11.2699	4367.68	360.389	2.56294	32287	1158.07	0.135277
2012	Chunhua County	0.120248	0.0386429	10.9852	0.00160321	20	107593	2.5125	21265.2	523.438	1.60321	25432	1271.6	0.836161
2013	Chunhua County	0.192426	0.0477065	12.6978	0.00158323	20	112882	2.677	21358.7	545.214	1.58323	26034	1301.7	0.820415
2014	Chunhua County	0.255989	0.0710612	11.8668	0.00176009	19	115757	3.2	2263.88	584.318	1.76009	27330	1438.42	0.0828351
2015	Chunhua County	0.335193	0.100318	11.9546	0.00144849	20	136112	3.2455	2256.58	660.326	1.44849	28754	1437.7	0.0784787
2016	Chunhua County	0.431606	0.162098	12.4285	0.00137114	19.7	161053	3.79594	2276.95	760.732	1.37114	28756	1459.7	0.0791817
2017	Chunhua County	0.563582	0.224376	12.0952	0.00185922	19.7	175098	3.86193	10623.5	773.957	1.85922	28762	1460	0.369358
2018	Chunhua County	0.620478	0.235613	11.9338	0.00156397	19.78	203973	3.91911	18970	788.606	1.56397	28670	1449.44	0.661667
2019	Chunhua County	0.674499	0.284915	11.8576	0.00170797	19.81	210000	4.14182	27316.5	834.354	1.70797	28698	1448.66	0.951862
2020	Chunhua County	0.789772	0.339653	11.7322	0.00183579	14.18	210454	6.39915	27629.5	923.093	1.83579	28726	2025.81	0.961828
2021	Chunhua County	0.889222	0.365421	11.9707	0.00254128	8.55	224792	8.65649	26613	418.616	2.54128	28754	3363.04	0.925541
2012	Linyou County	0.122421	0.0197574	10.3468	0.00187202	9	72355	5.62111	12455.7	296.89	1.87202	29530	3281.11	0.421799
2013	Linyou County	0.179518	0.0444253	12.0653	0.0017415	9	76031	6.19444	11384	327.171	1.7415	30252	3361.33	0.376305
2014	Linyou County	0.378219	0.0921336	11.2171	0.00198306	9	90789	7.16444	11444.4	378.404	1.98306	30045	3338.33	0.38091
2015	Linyou County	0.389782	0.0740457	11.4315	0.00168664	9	95341	7.91111	11572.9	417.312	1.68664	30057	3339.67	0.385031
2016	Linyou County	0.403423	0.107207	11.7864	0.00162613	8.74	101202	12.1899	11772.9	625.235	1.62613	30057	3439.02	0.391687
2017	Linyou County	0.498707	0.129222	11.4866	0.00187861	9.23	117500	11.8873	13165.1	643.897	1.87861	29546	3201.08	0.445579
2018	Linyou County	0.472286	0.104726	11.2249	0.00188309	9.21	133800	15.2672	14557.2	825.176	1.88309	29464	3199.13	0.494068
2019	Linyou County	0.640289	0.160937	11.1692	0.0018887	9.23	145246	13.896	15949.3	752.7	1.8887	29205	3164.14	0.546117
2020	Linyou County	0.777451	0.198952	10.9647	0.00234916	7.33	150800	24.422	16112.4	1050.47	2.34916	28946	3948.98	0.556636
2021	Linyou County	0.954616	0.231813	11.2773	0.00273176	5.43	151300	34.948	16226.6	650.235	2.73176	28687	5283.06	0.565642
2012	Feng County	0.250242	0.0531747	8.54839	0.00307841	10	91572	13.21	9684.27	408.566	3.07841	9714	971.4	0.996939
2013	Feng County	0.27312	0.066363	10.0599	0.00322078	10	80489	14.561	8973.94	456.887	3.22078	9645	964.5	0.930424
2014	Feng County	0.371184	0.0789021	9.254	0.00278024	10	82366	14.845	989.788	465.799	2.78024	9624	962.4	0.102846
2015	Feng County	0.391854	0.0974229	9.70492	0.00286693	10	119451	17.74	914.243	535.739	2.86693	9631	963.1	0.0949271
2016	Feng County	0.40985	0.0859891	9.69318	0.00248141	9.54	117177	18.8785	9238.39	565.108	2.48141	9620	1008.39	0.960331
2017	Feng County	0.50445	0.104636	9.59008	0.00295506	10.75	124808	12.4447	10407.4	419.768	2.95506	9585	891.628	1.0858
2018	Feng County	0.515253	0.125488	9.27021	0.00301292	10.73	131660	7.23764	11576.4	243.677	3.01292	9439	879.683	1.22645
2019	Feng County	0.526101	0.120588	9.33431	0.00335528	10.71	140269	7.45542	12745.4	250.541	3.35528	9368	874.697	1.36053
2020	Feng County	0.647045	0.147089	9.02772	0.00380315	7.92	170742	11.5525	12878.4	287.09	3.80315	9297	1173.86	1.38522
2021	Feng County	0.718989	0.157261	9.47171	0.00452028	5.13	171647	15.6496	12972.5	43.2695	4.52028	9226	1798.44	1.40609
2012	Taibai County	0.118566	0.0160572	7.02104	0.00372958	5	59973	3.166	117.357	58.6731	3.72958	6513	1302.6	0.0180188
2013	Taibai County	0.219222	0.0558812	8.46079	0.00340219	5	68601	3.422	1789.58	63.4173	3.40219	6482	1296.4	0.276085
2014	Taibai County	0.246505	0.0629428	7.58222	0.00373426	5	73927	3.92	1899.88	72.6464	3.73426	6460	1292	0.294099
2015	Taibai County	0.431024	0.091115	8.10761	0.00346332	5	93310	4.182	1126.59	77.5019	3.46332	6475	1295	0.173991
2016	Taibai County	0.385048	0.107802	8.03976	0.00318742	4.9	97379	4.58163	11197.6	75.6402	3.18742	6498	1326.12	1.72324
2017	Taibai County	0.422394	0.116038	7.98012	0.00343823	5.2	96029	5.32696	12856	102.653	3.43823	6470	1244.23	1.98702
2018	Taibai County	0.526267	0.127579	7.55208	0.00418314	5.18	113563	5.84149	14514.5	112.153	4.18314	6475	1250	2.24162
2019	Taibai County	0.619142	0.152338	7.66931	0.00391411	5.15	103118	7.27524	16172.9	138.871	3.91411	6465	1255.34	2.50161
2020	Taibai County	0.763127	0.168703	7.50382	0.00381629	3.96	113747	11.5179	16224.7	168.818	3.81629	6455	1630.05	2.51351
2021	Taibai County	0.846948	0.184776	8.01397	0.00511705	2.77	115186	15.7606	16225.4	223.239	5.11705	6445	2326.71	2.51752
2012	Lueyang County	0.199964	0.0341763	11.1197	0.00280116	20	120616	3.2935	7445.59	232.674	2.80116	10074	503.7	0.73909
2013	Lueyang County	0.246167	0.0607185	12.534	0.00293219	19	130816	3.32579	6435.85	223.207	2.93219	10072	530.105	0.638984
2014	Lueyang County	0.265467	0.0543516	11.9116	0.00272108	19	131970	2.65579	6519.97	178.241	2.72108	10046	528.737	0.649011
2015	Lueyang County	0.345679	0.0915011	12.294	0.00282542	19	140726	2.94422	6524.26	197.598	2.82542	10046	528.737	0.649439
2016	Lueyang County	0.369529	0.0897907	12.4862	0.00229658	18.53	181022	3.64492	6556.63	238.573	2.29658	10046	542.148	0.65266
2017	Lueyang County	0.486976	0.11277	12.3248	0.0027366	20.03	192519	3.6122	4403.73	255.558	2.7366	10046	501.548	0.438357
2018	Lueyang County	0.42935	0.102578	12.1019	0.00290801	20	222919	3.55828	2250.84	251.379	2.90801	10046	502.3	0.224053
2019	Lueyang County	0.570997	0.143755	11.9762	0.00300554	20	298695	3.1915	97.9395	225.468	3.00554	10045	502.25	0.00975007
2020	Lueyang County	0.7053	0.178036	11.7717	0.00372668	14.4	265986	4.84278	987.384	246.203	3.72668	10044	697.5	0.0983058
2021	Lueyang County	0.857299	0.210161	11.9058	0.00416138	8.8	248707	6.49406	9186.83	171.318	4.16138	10043	1141.25	0.91475
2012	Ningqiang County	0.111565	0.015818	11.6533	0.00351994	33	157816	1.69242	3528.74	171.319	3.51994	21256	644.121	0.166011
2013	Ningqiang County	0.193232	0.046516	12.9366	0.00355383	33	151795	1.87667	349.148	189.969	3.55383	21259	644.212	0.0164235
2014	Ningqiang County	0.325309	0.0834445	12.2695	0.00343671	33	169701	1.94333	38.4519	196.687	3.43671	21263	644.333	0.00180839
2015	Ningqiang County	0.425445	0.131126	12.7753	0.00316055	33	186927	2.16788	381.872	219.448	3.16055	21267	644.455	0.0179561
2016	Ningqiang County	0.63311	0.158141	12.9055	0.00265309	32.66	200081	2.55525	399.818	255.521	2.65309	21249	650.612	0.0188159
2017	Ningqiang County	0.769439	0.194867	12.7148	0.0030204	30.91	227177	2.88855	1691.08	273.151	3.0204	21296	688.968	0.0794081
2018	Ningqiang County	0.582016	0.135799	12.4884	0.00347467	30.88	263861	3.23873	2982.33	306.784	3.47467	21164	685.363	0.140915
2019	Ningqiang County	0.668915	0.169827	12.3729	0.00337119	30.89	304326	3.45219	4273.59	327.111	3.37119	21173	685.432	0.201842
2020	Ningqiang County	0.768423	0.19304	12.2692	0.00440394	25.64	278542	4.8749	439.295	383.412	4.40394	21182	826.131	0.0207391
2021	Ningqiang County	0.8588	0.198098	12.4493	0.0045404	20.39	252758	6.2976	4353.89	14.816	4.5404	21191	1039.28	0.20546
2012	Foping County	0.07267	0.00656547	9.41398	0.00350773	3	46501	1.93	8292.57	45.2697	3.50773	1833	611	4.52404
2013	Foping County	0.211185	0.0539985	10.9097	0.00318947	3	53051	2.21667	7159.69	51.9937	3.18947	1833	611	3.90599
2014	Foping County	0.301223	0.0767122	10.1111	0.00337359	3	55700	2.44	7246.8	57.2322	3.37359	1871	623.667	3.87322
2015	Foping County	0.424575	0.0974009	10.4485	0.00337999	3	66274	2.85333	7246.54	66.9273	3.37999	1883	627.667	3.8484
2016	Foping County	0.446343	0.089085	10.5452	0.00295981	3.3	76669	2.9697	7312.62	76.6224	2.95981	1854	561.818	3.94424
2017	Foping County	0.526379	0.101224	10.3516	0.00358053	3.02	80655	3.61132	5286.86	85.2432	3.58053	1849	612.252	2.85931
2018	Foping County	0.642303	0.114299	9.97183	0.00343542	3.02	80018	3.82318	3261.1	89.7318	3.43542	1855	614.238	1.75801
2019	Foping County	0.709683	0.119009	10.0334	0.00422469	3.02	79661	3.93425	1235.35	93.7751	4.22469	1853	613.576	0.666674
2020	Foping County	0.785536	0.131933	9.91317	0.00398737	2.66	93233	4.96923	1334.96	103.001	3.98737	1851	695.865	0.721209
2021	Foping County	0.849216	0.147201	10.3524	0.00555712	2.3	91759	6.0042	1457.5	69.2976	5.55712	1849	803.913	0.788261
2012	Liuba County	0.0583215	0.00254818	9.64703	0.00365964	4	53101	2.5175	18.9699	54.315	3.65964	3086	771.5	0.0061471
2013	Liuba County	0.165218	0.043618	11.1257	0.00380744	4	53291	2.855	934.246	61.5965	3.80744	3086	771.5	0.302737
2014	Liuba County	0.267411	0.0610448	10.3499	0.00323613	4	61465	3.1925	94.1414	64.9873	3.23613	3066	766.5	0.030705
2015	Liuba County	0.379521	0.091445	10.7949	0.00320853	4	61458	3.5275	939.415	71.8066	3.20853	3061	765.25	0.306898
2016	Liuba County	0.432896	0.0882311	10.7983	0.00294223	4.25	76000	3.69176	966.164	79.8473	2.94223	3131	736.706	0.30858
2017	Liuba County	0.503061	0.103622	10.6944	0.00327371	4.35	83583	3.8969	1088.56	86.116	3.27371	3144	722.759	0.346233
2018	Liuba County	0.61952	0.1462	10.3775	0.00347208	4.34	93144	4.37512	1210.95	95.1379	3.47208	3118	718.433	0.388374
2019	Liuba County	0.743045	0.190677	10.3577	0.00375178	4.34	94270	4.58525	1333.34	101.272	3.75178	3134	722.12	0.425445
2020	Liuba County	0.865432	0.234586	10.2759	0.00396874	3.53	113600	6.24646	1351.4	112.214	3.96874	3150	892.351	0.429014
2021	Liuba County	0.952195	0.251976	10.5691	0.00493081	2.72	112300	7.90766	1372.55	279.695	4.93081	3166	1163.97	0.433528
2012	Xixiang County	0.0747855	0.0228797	11.9781	0.00385365	42	164500	1.55239	642.667	199.694	3.85365	21711	516.929	0.029601
2013	Xixiang County	0.121573	0.0357864	13.4052	0.00329277	42	179588	1.79476	554.913	230.873	3.29277	21861	520.5	0.0253837
2014	Xixiang County	0.249863	0.0580825	12.6097	0.00354494	42	199500	1.93333	573.713	249.616	3.54494	21950	522.619	0.0261373
2015	Xixiang County	0.361863	0.0879775	12.8913	0.00372277	42	222550	2.15929	577.659	278.789	3.72277	21950	522.619	0.0263171
2016	Xixiang County	0.384784	0.0883829	13.2815	0.00299867	41.45	239611	2.45428	572.733	312.727	2.99867	21950	529.554	0.0260926
2017	Xixiang County	0.482305	0.111466	12.9035	0.00397963	34.5	256329	3.21315	644.605	340.773	3.97963	21950	636.232	0.029367
2018	Xixiang County	0.516319	0.109303	12.7873	0.00388909	34.46	261977	3.38657	716.477	358.75	3.88909	22345	648.433	0.0320643
2019	Xixiang County	0.653705	0.144899	12.6042	0.00423439	34.47	307656	3.5428	788.349	375.408	4.23439	22345	648.245	0.0352808
2020	Xixiang County	0.804168	0.1813	12.6332	0.00428631	32.15	285859	4.16747	794.157	411.878	4.28631	22345	695.023	0.0355407
2021	Xixiang County	0.857672	0.212747	12.778	0.00595885	29.83	289045	4.79213	81.5881	124.5	5.95885	22345	749.078	0.00365129
2012	Zhenba County	0.0611117	0.00846955	11.0596	0.00382393	29	129086	1.66	18623.8	141.008	3.82393	23674	816.345	0.786677
2013	Zhenba County	0.144432	0.0343591	12.562	0.00333402	29	148470	1.94552	19197.9	165.261	3.33402	23650	815.517	0.811752
2014	Zhenba County	0.228958	0.0612838	11.6751	0.00402408	29	157028	2.13448	19952.4	169.625	4.02408	23631	814.862	0.844333
2015	Zhenba County	0.416213	0.105218	12.0266	0.00421433	29	178736	2.24724	19544.7	189.613	4.21433	23620	814.483	0.827465
2016	Zhenba County	0.454437	0.114004	12.2454	0.00340302	28.41	190789	2.76346	23829.3	228.426	3.40302	23699	834.178	1.0055
2017	Zhenba County	0.534792	0.143804	12.0247	0.00455332	24.89	241629	3.39726	27937.1	246.022	4.55332	23814	956.77	1.17314
2018	Zhenba County	0.592589	0.167062	11.8462	0.00373799	24.87	284877	3.71723	32044.8	268.977	3.73799	24026	966.063	1.33376
2019	Zhenba County	0.69573	0.197716	11.7166	0.00416547	24.88	373966	3.33557	36152.6	241.457	4.16547	24058	966.961	1.50273
2020	Zhenba County	0.787627	0.228371	11.7445	0.00469476	21.09	305168	4.48959	37412.2	275.489	4.69476	24090	1142.25	1.55302
2021	Zhenba County	0.91802	0.259025	12.0012	0.00614236	17.3	301825	5.64362	38771.9	454.728	6.14236	24122	1394.34	1.60733
2012	Hantai District	0.223657	0.0624044	12.7276	0.00346812	56.29	179216	3.14692	2867.34	3185.97	3.46812	14923	265.109	0.192143
2013	Hantai District	0.296417	0.0755239	14.055	0.00306007	56.82	212643	3.58835	18422.9	3667.09	3.06007	14815	260.736	1.24353
2014	Hantai District	0.3237	0.08586	13.3858	0.00318402	57.2	216471	4.2535	18587.9	4141.19	3.18402	14773	258.269	1.25823
2015	Hantai District	0.423056	0.109384	13.7594	0.00306015	57.52	264497	4.38578	18597.7	4537.23	3.06015	14618	254.138	1.27225
2016	Hantai District	0.36965	0.0885825	14.0488	0.00253548	57.05	285947	5.37686	2182.4	5169.06	2.53548	14064	246.521	0.155176
2017	Hantai District	0.421816	0.0953477	13.6333	0.00320874	54.08	319687	5.96413	12996.4	5801.08	3.20874	13787	254.937	0.942656
2018	Hantai District	0.438406	0.101381	13.5535	0.00343535	54.02	365757	6.9615	23810.4	6763.67	3.43535	13740	254.35	1.73293
2019	Hantai District	0.519989	0.122862	13.3321	0.00385077	54.03	377779	6.9554	34624.4	6758.99	3.85077	13490	249.676	2.56667
2020	Hantai District	0.590901	0.139007	13.2356	0.00372529	61.82	328417	6.74734	34944.5	6754.32	3.72529	13240	214.17	2.63931
2021	Hantai District	0.325755	0.0741675	13.3821	0.00481373	69.61	279055	6.53928	35341.8	1737.23	4.81373	12990	186.611	2.7207
2012	Mian County	0.0749621	0.0172936	10.7415	0.00369079	43	164777	2.45293	15153.2	442.653	3.69079	26231	610.023	0.577683
2013	Mian County	0.144133	0.0392784	12.065	0.00353029	43	187699	2.59932	1397.23	467.716	3.53029	26284	611.256	0.0531589
2014	Mian County	0.207919	0.0454743	11.3808	0.0034438	43	195829	2.45932	13265.9	439.526	3.4438	26321	612.116	0.504006
2015	Mian County	0.230727	0.0637494	11.7954	0.00341624	43	223185	2.35256	13272.5	420.449	3.41624	26480	615.814	0.501228
2016	Mian County	0.245332	0.0541087	11.9433	0.00284252	42.76	263309	3.23152	13349.3	537.282	2.84252	26605	622.194	0.50176
2017	Mian County	0.321672	0.0792371	11.6789	0.00336252	39.4	274556	3.74569	9514.92	612.545	3.36252	28034	711.523	0.339406
2018	Mian County	0.350228	0.0782321	11.5475	0.00357848	38.41	300720	3.82779	5680.52	611.079	3.57848	28557	743.478	0.198919
2019	Mian County	0.405567	0.0857959	11.3863	0.00381747	38.41	314217	4.18979	1846.12	668.868	3.81747	28354	738.193	0.0651096
2020	Mian County	0.481248	0.0939516	11.3182	0.00415161	34.49	310432	5.18237	1856.45	742.892	4.15161	28151	816.208	0.0659462
2021	Mian County	0.705065	0.169119	11.542	0.00508099	30.57	275982	6.17495	18755.6	477.556	5.08099	27948	914.23	0.67109
2012	Nanzheng District	0.29411	0.0786707	11.364	0.0045141	56	218682	2.41714	2876.49	476.133	4.5141	30224	539.714	0.0951725
2013	Nanzheng District	0.34655	0.0950549	12.7038	0.00405407	56	235237	2.75714	24265.4	545.467	4.05407	30164	538.643	0.80445
2014	Nanzheng District	0.380482	0.0948559	11.9428	0.00428053	57	264524	2.89263	26123.4	583.853	4.28053	30446	534.14	0.858025
2015	Nanzheng District	0.61933	0.155598	12.4254	0.00394307	57	293040	3.5386	2636.35	616.395	3.94307	29194	512.175	0.0903046
2016	Nanzheng District	0.636426	0.166401	12.5784	0.00333032	56.53	311057	3.44333	26470	681.409	3.33032	29198	516.505	0.906568
2017	Nanzheng District	0.544444	0.119316	12.2749	0.0041132	47.77	346227	4.53966	29824.3	772.008	4.1132	34351	719.091	0.868221
2018	Nanzheng District	0.533306	0.118951	12.1066	0.00415725	47.72	382132	4.57694	33178.6	777.54	4.15725	34783	728.898	0.953873
2019	Nanzheng District	0.575467	0.129704	12.009	0.00462916	47.74	390344	4.72443	36532.9	802.935	4.62916	36179	757.834	1.00978
2020	Nanzheng District	0.693806	0.162339	12.0119	0.00488267	46.62	424527	5.14259	36853.2	853.498	4.88267	37575	805.985	0.98079
2021	Nanzheng District	0.719346	0.168318	12.2108	0.00618719	45.5	375994	5.56074	58162.6	428.266	6.18719	38971	856.506	1.49246
2012	Chenggu County	0.036622	0.000301356	12.084	0.00357903	54	182600	2.56926	47945.9	610.552	3.57903	24326	450.481	1.97097
2013	Chenggu County	0.245079	0.0481386	13.422	0.00323514	54	211118	3.12667	4257.47	745.43	3.23514	24325	450.463	0.175025
2014	Chenggu County	0.378531	0.0774821	12.7313	0.00326283	54	227081	3.56519	4695.27	849.978	3.26283	24150	447.222	0.194421
2015	Chenggu County	0.441372	0.089378	13.0978	0.00314695	54	280012	4.22593	49544.9	959.029	3.14695	24143	447.093	2.05215
2016	Chenggu County	0.423606	0.100194	13.3674	0.00269135	54.27	306988	4.54653	65577.4	1089.36	2.69135	23999	442.215	2.7325
2017	Chenggu County	0.516033	0.122116	12.9988	0.00334191	47.24	340164	5.51227	46999.4	1149.67	3.34191	23908	506.097	1.96584
2018	Chenggu County	0.633305	0.156634	12.8514	0.00359597	47.19	372798	4.92564	28421.5	1026.23	3.59597	23797	504.281	1.19433
2019	Chenggu County	0.673539	0.168364	12.7018	0.00400876	47.21	400825	5.32544	9843.49	1110	4.00876	23781	503.728	0.413923
2020	Chenggu County	0.721941	0.182554	12.7383	0.00386871	44.2	374989	6.39	9165.73	1246.97	3.86871	23765	537.67	0.385682
2021	Chenggu County	0.88702	0.2319	12.9039	0.00509182	41.19	360158	7.45456	1816.77	325.607	5.09182	23749	576.572	0.0764987
2012	Yang County	0.0278352	0.000316099	11.4323	0.00324934	45	169489	1.89	14616.2	265.284	3.24934	27923	620.511	0.523447
2013	Yang County	0.162173	0.0426501	12.7446	0.00288588	45	188892	2.97778	12636.5	294.448	2.88588	27732	616.267	0.455664
2014	Yang County	0.208004	0.0463775	12.0369	0.00307887	45	221117	2.228	12799.2	312.726	3.07887	27636	614.133	0.463136
2015	Yang County	0.262176	0.0531751	12.3206	0.00312749	45	247469	2.36733	13216.8	332.283	3.12749	27790	617.556	0.475597
2016	Yang County	0.442093	0.107185	12.6377	0.00261977	44.93	276789	2.69852	1491.62	377.105	2.61977	27972	622.568	0.0533256
2017	Yang County	0.418337	0.105489	12.2811	0.00327507	38.74	306937	3.61545	1068.8	436.876	3.27507	28031	723.567	0.0381294
2018	Yang County	0.616263	0.153846	12.0793	0.00339625	38.7	315140	4.21597	645.985	508.915	3.39625	27968	722.687	0.0230973
2019	Yang County	0.684787	0.165029	12.0005	0.00396018	38.71	337963	4.4525	223.165	537.605	3.96018	27962	722.346	0.00798102
2020	Yang County	0.880332	0.211421	12.0489	0.00365393	34.54	340335	5.5849	22491.9	601.692	3.65393	27956	809.38	0.804548
2021	Yang County	0.955144	0.225291	12.2602	0.0050814	30.37	302461	6.7173	1277.58	508.515	5.0814	27950	920.316	0.0457095
2012	Hanbin District	0.29927	0.0731466	13.1646	0.00238625	101.93	321967	1.83923	494.244	514.603	2.38625	42932	421.191	0.0115122
2013	Hanbin District	0.313702	0.0833086	14.855	0.00216557	102.45	355397	2.53587	382.279	577.519	2.16557	42740	417.179	0.0089443
2014	Hanbin District	0.409836	0.0967778	13.9468	0.00271129	102.58	409899	2.27842	3326.73	641.559	2.71129	41938	408.832	0.0793249
2015	Hanbin District	0.478481	0.109573	14.0447	0.00256373	100.84	492528	2.55952	3492.49	692.177	2.56373	41582	412.356	0.0839903
2016	Hanbin District	0.499802	0.105072	14.7472	0.00207389	100.83	510102	2.88525	3518.4	798.573	2.07389	40841	405.048	0.0861487
2017	Hanbin District	0.503889	0.08862	14.2868	0.0031259	88.04	529209	3.88869	4753.66	939.775	3.1259	40706	462.358	0.11678
2018	Hanbin District	0.615286	0.10543	14.1642	0.00229795	88.38	643953	4.31364	5988.92	1045.7	2.29795	40566	458.995	0.147634
2019	Hanbin District	0.710266	0.125231	13.9997	0.00250996	88.64	740291	4.23985	7224.19	1031.62	2.50996	40426	456.069	0.178701
2020	Hanbin District	0.785095	0.145031	13.8922	0.00306739	89.49	724265	0.448497	7537.82	99.451	3.06739	40286	450.173	0.187108
2021	Hanbin District	0.158675	0.000276233	13.9592	0.00417577	90.34	708239	-3.34285	894.255	70.162	4.17577	23285	257.749	0.0384048
2012	Langao County	0.121718	0.0177064	10.752	0.00356915	17	98712	1.82118	5468.27	158.282	3.56915	17184	1010.82	0.318219
2013	Langao County	0.20608	0.0563699	12.1658	0.00334037	17	122156	2.65294	3411.83	179.407	3.34037	17180	1010.59	0.198593
2014	Langao County	0.285008	0.0832594	11.4046	0.00403556	17	128389	2.36588	3681.59	205.059	4.03556	16807	988.647	0.219051
2015	Langao County	0.360389	0.102462	11.7533	0.00393043	17	145268	2.67824	429.356	232.652	3.93043	17050	1002.94	0.0251822
2016	Langao County	0.426695	0.116817	11.9863	0.00321785	16.82	165134	3.12426	7424.12	268.523	3.21785	17057	1014.09	0.435254
2017	Langao County	0.447924	0.12372	11.7634	0.00444798	15.6	187182	3.84938	9563.87	303.304	4.44798	16806	1077.31	0.569075
2018	Langao County	0.56215	0.148638	11.5154	0.00374968	15.65	208179	3.77278	11703.6	296.469	3.74968	16811	1074.19	0.696188
2019	Langao County	0.722778	0.20724	11.489	0.00382094	15.67	304832	3.17218	13843.4	248.8	3.82094	16816	1073.13	0.823226
2020	Langao County	0.768293	0.212516	11.3978	0.00450077	13.5	302919	4.74137	14444.6	281.044	4.50077	16821	1246	0.858726
2021	Langao County	0.527763	0.157985	11.7292	0.00500955	11.33	237918	6.31057	2324.9	242.31	5.00955	18379	1622.15	0.126497
2012	Hanyin County	0.172626	0.0290309	12.9108	0.00276423	31	135000	1.89645	1438.62	429.377	2.76423	23269	750.613	0.0618255
2013	Hanyin County	0.217822	0.06003	14.5535	0.00236475	31	157000	2.27742	896.899	501.392	2.36475	23041	743.258	0.0389262
2014	Hanyin County	0.3238	0.0800464	13.7106	0.00294924	31	171000	2.5	966.589	567.766	2.94924	22947	740.226	0.0421227
2015	Hanyin County	0.445144	0.126195	13.789	0.00293558	31	189000	2.77935	114.553	631.209	2.93558	22901	738.742	0.00500212
2016	Hanyin County	0.448784	0.110638	14.3937	0.00224254	31.12	192000	3.58846	121.181	697.363	2.24254	22919	736.472	0.00528737
2017	Hanyin County	0.516789	0.128671	14.0466	0.00336058	24.9	207000	4.32418	177.285	788.793	3.36058	22811	916.104	0.00777189
2018	Hanyin County	0.588326	0.135109	13.9139	0.00263249	24.97	258700	4.55479	233.388	824.189	2.63249	22630	906.288	0.0103132
2019	Hanyin County	0.669537	0.146585	13.6438	0.00292727	25.01	275000	4.45782	289.491	733.733	2.92727	22449	897.601	0.0128955
2020	Hanyin County	0.755096	0.165513	13.6035	0.00350791	24.02	280000	4.61746	2178.45	812.538	3.50791	22268	927.061	0.0978289
2021	Hanyin County	0.457571	0.119781	13.6942	0.0048391	23.03	255000	4.77711	7629.5	274.426	4.8391	13086	568.215	0.583027
2012	Shiquan County	0.177146	0.0385761	12.6366	0.00290019	18	121498	3.34556	4755.79	315.237	2.90019	13099	727.722	0.363065
2013	Shiquan County	0.134959	0.0342653	14.205	0.0022616	18	118995	3.42222	2995.23	361.214	2.2616	13100	727.778	0.228643
2014	Shiquan County	0.246657	0.055067	13.4567	0.00284085	18	133666	3.49889	3232.19	415.435	2.84085	13111	728.389	0.246525
2015	Shiquan County	0.34628	0.0872215	13.4842	0.00286167	18	161888	3.96833	3395.93	471.174	2.86167	13118	728.778	0.258876
2016	Shiquan County	0.431646	0.105706	14.0736	0.00212488	18	157006	4.49778	3448.84	527.771	2.12488	13129	729.389	0.262689
2017	Shiquan County	0.493324	0.130888	13.6886	0.00318525	18.28	184729	5.26217	2563.74	634.515	3.18525	13094	716.302	0.195795
2018	Shiquan County	0.645475	0.172278	13.5779	0.00269919	17.32	215990	5.43524	1678.64	620.965	2.69919	13141	758.718	0.127741
2019	Shiquan County	0.728392	0.190282	13.328	0.00319319	17.38	224081	4.77678	793.539	547.628	3.19319	13188	758.803	0.0601713
2020	Shiquan County	0.79997	0.204615	13.2396	0.00339045	17.42	235086	5.38978	741.768	619.327	3.39045	13235	759.759	0.0560459
2021	Shiquan County	0.658372	0.134666	13.3338	0.00492158	15.32	218040	1.23564	8517.37	51.4682	4.92158	3386	221.018	2.51547
2012	Ningshan County	0.157747	0.0383241	9.27667	0.00328479	7	68973	3.5	5282.26	58.222	3.28479	3390	484.286	1.55819
2013	Ningshan County	0.198421	0.0558487	10.7822	0.00281229	7	80249	3.17429	3371.98	60.4133	2.81229	3392	484.571	0.994098
2014	Ningshan County	0.253889	0.0723132	9.96342	0.00309185	7	80040	3.52857	3633.36	66.6667	3.09185	3403	486.143	1.06769
2015	Ningshan County	0.310407	0.0842002	10.2394	0.00315595	7	89699	3.82857	3833.91	72.3763	3.15595	3404	486.286	1.1263
2016	Ningshan County	0.373516	0.0991152	10.3358	0.00281568	7.26	95437	4.15427	3847.93	82.0011	2.81568	3404	468.871	1.13041
2017	Ningshan County	0.360029	0.0910834	10.1704	0.00352122	7.13	113223	4.86558	5211.89	94.3219	3.52122	3404	477.419	1.53111
2018	Ningshan County	0.432566	0.102364	9.83155	0.00328787	7.03	120909	4.51213	6575.85	86.2433	3.28787	3414	485.633	1.92614
2019	Ningshan County	0.534993	0.142024	9.94693	0.00365835	7.05	138176	3.28482	7939.82	62.9636	3.65835	3424	485.674	2.31887
2020	Ningshan County	0.582611	0.16207	9.86461	0.00357195	5.99	153656	4.6344	8283.75	66.1773	3.57195	3434	573.289	2.41227
2021	Ningshan County	0.481962	0.123316	10.2793	0.00518233	4.93	145318	5.98397	12928.7	126.971	5.18233	24386	4946.45	0.530167
2012	Ziyang County	0.170239	0.0306868	11.909	0.00335041	34	155396	1.59941	86.9924	246.733	3.35041	24370	716.765	0.00356965
2013	Ziyang County	0.173713	0.0356199	13.4579	0.00317772	35	178088	1.85114	5361.94	289.241	3.17772	24249	692.829	0.22112
2014	Ziyang County	0.256379	0.0673456	12.5982	0.00375629	34	192301	2.19353	977.333	332.946	3.75629	24259	713.5	0.0402874
2015	Ziyang County	0.342543	0.10249	12.8725	0.00373996	34	210080	2.36759	1274.64	359.286	3.73996	24255	713.382	0.0525516
2016	Ziyang County	0.370905	0.103948	13.233	0.00303061	33.7	227310	2.69347	1369.87	405.223	3.03061	24036	713.234	0.0569924
2017	Ziyang County	0.45216	0.119431	12.9601	0.0042882	28.72	265788	3.68994	8121.1	462.725	4.2882	22691	790.077	0.357899
2018	Ziyang County	0.619421	0.142013	12.8066	0.00337692	28.67	299279	3.82251	14872.3	489.247	3.37692	22578	787.513	0.658709
2019	Ziyang County	0.664227	0.166213	12.6147	0.00353624	28.7	435244	3.52784	21623.6	448.794	3.53624	22465	782.753	0.962544
2020	Ziyang County	0.786298	0.209263	12.6045	0.00432388	26.1	465950	4.13196	22716.8	481.447	4.32388	22352	856.398	1.01632
2021	Ziyang County	0.317611	0.0563242	12.8395	0.00518743	23.5	343931	4.73608	12384.7	376.384	5.18743	17168	730.553	0.72138
2012	Xunyang City	0.118249	0.0267803	12.6094	0.00215088	46	212079	2.17413	7612.85	281.401	2.15088	36361	790.457	0.209368
2013	Xunyang City	0.199365	0.0497788	14.3558	0.00203206	46	243039	2.44283	4727.67	317.34	2.03206	36410	791.522	0.129845
2014	Xunyang City	0.355599	0.0732568	13.4849	0.00245428	46	262860	2.69769	55.7812	350.438	2.45428	36542	794.391	0.0015265
2015	Xunyang City	0.423885	0.108076	13.5173	0.00227894	46	250293	2.99634	521.879	389.24	2.27894	36650	796.739	0.0142395
2016	Xunyang City	0.42212	0.115232	14.2984	0.00199156	45.82	296845	3.48988	5155.9	451.483	1.99156	36659	800.065	0.140645
2017	Xunyang City	0.464067	0.121977	13.8811	0.00293118	43.17	329054	4.35454	3930.21	530.883	2.93118	36600	847.811	0.107383
2018	Xunyang City	0.576185	0.134041	13.6643	0.00216493	43.47	375535	4.32949	2704.52	528.238	2.16493	36772	845.917	0.0735482
2019	Xunyang City	0.64387	0.14379	13.6188	0.0021912	43.57	399382	3.98163	1478.82	489.918	2.1912	36944	847.923	0.0400288
2020	Xunyang City	0.713387	0.154262	13.4963	0.00276337	35.79	410610	5.68726	1895.88	566.892	2.76337	37116	1037.05	0.0510799
2021	Xunyang City	0.531753	0.131313	13.5133	0.00372617	28.01	380289	7.39288	6666.9	113.555	3.72617	13840	494.109	0.481712
2012	Pingli County	0.131753	0.029473	11.2862	0.00320987	24	122745	2.14167	4126.11	190.782	3.20987	18372	765.5	0.224587
2013	Pingli County	0.185489	0.0434712	12.7098	0.00311196	24	142723	2.52458	2548.67	228.814	3.11196	18332	763.833	0.139029
2014	Pingli County	0.282202	0.050739	11.934	0.00364589	23	161892	2.95348	2738.99	256.533	3.64589	18287	795.087	0.149778
2015	Pingli County	0.353586	0.077946	12.2183	0.00348209	23	164530	3.36435	2869.86	291.881	3.48209	18152	789.217	0.158101
2016	Pingli County	0.467479	0.105907	12.6295	0.00293495	23.27	184149	3.76166	2893.37	330.514	2.93495	18245	784.057	0.158584
2017	Pingli County	0.519095	0.126658	12.3367	0.00403806	19.53	202612	5.11116	3868.7	376.227	4.03806	18216	932.719	0.212379
2018	Pingli County	0.575625	0.13955	12.1054	0.00334042	19.59	241096	5.33716	4844.03	392.371	3.34042	18599	949.413	0.260446
2019	Pingli County	0.651412	0.150094	12.1008	0.00332775	19.63	266031	4.53875	5819.36	336.464	3.32775	18982	966.989	0.306573
2020	Pingli County	0.728835	0.167641	11.9698	0.00406652	18.13	283384	5.73998	622.676	392.998	4.06652	19365	1068.12	0.0321547
2021	Pingli County	0.0607341	0.0117872	12.2815	0.00467388	16.63	231155	6.94122	3746.75	45.3172	4.67388	4943	297.234	0.757991
2012	Zhenping County	0.176117	0.0353015	9.7065	0.00396888	6	58781	2.15833	2322.75	86.5063	3.96888	4948	824.667	0.469431
2013	Zhenping County	0.0817634	0.0196535	11.0828	0.00360854	6	71336	2.1	1449.53	80.2929	3.60854	4966	827.667	0.29189
2014	Zhenping County	0.0853751	0.0202153	10.3455	0.00451119	6	69333	2.26	1564.95	90.2796	4.51119	4965	827.5	0.315196
2015	Zhenping County	0.0879779	0.0205577	10.7166	0.00414599	6	74866	2.54333	1643.89	101.598	4.14599	4981	830.167	0.330033
2016	Zhenping County	0.0868533	0.0225182	10.7873	0.00375814	5.94	88460	3.2364	1657.45	127.678	3.75814	4933	830.471	0.335992
2017	Zhenping County	0.0832177	0.0165492	10.7008	0.00472811	5.16	90509	4.46277	2244.45	153.315	4.72811	4926	954.651	0.455634
2018	Zhenping County	0.089319	0.0189486	10.3564	0.00413523	5.18	101101	4.69955	2831.46	162.058	4.13523	4955	956.564	0.571435
2019	Zhenping County	0.10262	0.0224248	10.4427	0.00403467	5.18	123318	4.58875	3418.46	158.254	4.03467	4984	962.162	0.685888
2020	Zhenping County	0.108722	0.0248242	10.3382	0.00482751	4.74	129533	5.52516	3579.58	174.361	4.82751	5013	1057.59	0.71406
2021	Zhenping County	0.469937	0.06196	10.8179	0.00526176	4.3	123562	6.46157	969.471	225.766	5.26176	36208	8420.47	0.0267751
2012	Baihe County	0.339545	0.0983396	12.736	0.00217129	21	126000	1.97948	61.1229	285.636	2.17129	13895	661.667	0.00439891
2013	Baihe County	0.042315	0.0119781	14.3148	0.00241577	21	134567	2.29857	375.251	332.209	2.41577	13885	661.19	0.0270256
2014	Baihe County	0.0488726	0.0132907	13.494	0.00266631	21	142285	2.49667	46.1878	360.84	2.66631	14097	671.286	0.00327642
2015	Baihe County	0.0751601	0.017068	13.5735	0.00245233	21	165400	2.83524	426.575	409.773	2.45233	14097	671.286	0.03026
2016	Baihe County	0.0882489	0.0221592	14.3515	0.00226522	21.39	167503	3.15615	429.732	464.625	2.26522	14096	659	0.0304861
2017	Baihe County	0.085432	0.0196627	13.9541	0.00312272	16.53	200616	4.78969	582.333	544.897	3.12272	14097	852.813	0.041309
2018	Baihe County	0.124877	0.027627	13.7202	0.00238264	16.58	228900	4.81568	734.934	549.511	2.38264	14154	853.679	0.0519241
2019	Baihe County	0.32254	0.0759859	13.7592	0.002257	16.61	265050	4.27838	887.535	489.076	2.257	14211	855.569	0.0624541
2020	Baihe County	0.363337	0.0831038	13.5671	0.0032557	16.28	345566	4.86788	928.778	545.328	3.2557	14268	876.413	0.0650952
2021	Baihe County	0.570106	0.118165	13.6024	0.00375826	15.95	295048	5.45739	6982.13	678.665	3.75826	21578	1352.85	0.323576
2012	Shangzhou District	0.171298	0.0339868	10.1998	0.00237722	53	198269	2.4434	7175.79	405.501	2.37722	21378	403.358	0.335662
2013	Shangzhou District	0.192855	0.0535847	12.0244	0.00178025	55	212718	2.14	2472.72	440.307	1.78025	21230	386	0.116473
2014	Shangzhou District	0.410817	0.098493	11.2703	0.00245257	56	245118	2.19464	2584.77	459.955	2.45257	20972	374.5	0.123248
2015	Shangzhou District	0.441367	0.108516	11.3427	0.00236407	56	271961	2.43179	2695.41	509.319	2.36407	20967	374.411	0.128555
2016	Shangzhou District	0.433284	0.113321	11.6733	0.00219591	56.62	310358	2.71123	2767.99	574.513	2.19591	21112	372.872	0.13111
2017	Shangzhou District	0.466243	0.10349	11.4968	0.00273819	54.08	313492	2.83858	3471.81	574.515	2.73819	21344	394.675	0.16266
2018	Shangzhou District	0.532649	0.130177	11.2023	0.00229874	54.05	366900	2.95554	4175.62	586.632	2.29874	21448	396.818	0.194686
2019	Shangzhou District	0.654264	0.156493	11.4193	0.00243047	54.03	413367	2.62581	4879.43	529.903	2.43047	21552	398.89	0.226403
2020	Shangzhou District	0.761804	0.182809	11.2808	0.00244842	47.53	333721	3.189	538.737	567.264	2.44842	21656	455.628	0.024877
2021	Shangzhou District	0.526646	0.140433	11.3498	0.00353773	41.03	330218	3.75218	455.639	264.558	3.53773	31457	766.683	0.0144845
2012	Luonan County	0.182427	0.0289998	9.97866	0.00243241	46	206015	1.88696	559.858	292.721	2.43241	31671	688.5	0.0176773
2013	Luonan County	0.200078	0.0509978	11.8533	0.00186459	46	220265	2.13435	1751.43	325.3	1.86459	31794	691.174	0.0550867
2014	Luonan County	0.348811	0.0841599	11.0041	0.0024902	46	243928	2.15587	179.766	350.424	2.4902	31892	693.304	0.0056367
2015	Luonan County	0.454488	0.0971991	11.0367	0.00249252	46	266941	2.465	1894.73	400.671	2.49252	31974	695.087	0.0592583
2016	Luonan County	0.55744	0.124879	11.3241	0.00238848	46.33	268070	2.95572	1964.29	483.039	2.38848	32018	691.086	0.0613496
2017	Luonan County	0.582561	0.128871	11.2514	0.00268517	44.96	283434	3.12823	2527.01	496.979	2.68517	32140	714.858	0.0786252
2018	Luonan County	0.616931	0.142609	10.9252	0.00235555	44.94	315306	3.35674	3089.74	524.936	2.35555	32260	717.846	0.0957761
2019	Luonan County	0.723858	0.168729	11.235	0.00255453	44.92	378919	2.63894	3652.46	418.873	2.55453	32380	720.837	0.1128
2020	Luonan County	0.784742	0.205668	11.0115	0.00251934	36.75	388746	3.7526	3791.92	487.307	2.51934	32500	884.354	0.116675
2021	Luonan County	0.544893	0.14266	11.1762	0.00355431	28.58	362289	4.86626	4341.68	233.463	3.55431	12307	430.616	0.352781
2012	Shanyang County	0.318283	0.0824406	10.9798	0.00241312	47	197743	1.71872	549.666	228.515	2.41312	24001	510.66	0.0229018
2013	Shanyang County	0.289691	0.0628153	12.7029	0.00188247	47	221761	2.32128	1868.86	270.184	1.88247	24003	510.702	0.0778595
2014	Shanyang County	0.46782	0.118645	11.961	0.00232673	47	252670	2.21383	1948.46	294.342	2.32673	23992	510.468	0.0812128
2015	Shanyang County	0.52322	0.126032	12.0554	0.00216595	47	282617	2.58852	217.189	343.14	2.16595	23975	510.106	0.00905898
2016	Shanyang County	0.541445	0.127676	12.5321	0.00215379	46.9	317339	3.77825	211.168	408.345	2.15379	23971	511.109	0.00880929
2017	Shanyang County	0.487037	0.0897416	12.2435	0.00293676	42.83	338560	3.45442	1515.08	418.537	2.93676	23964	559.514	0.0632233
2018	Shanyang County	0.585981	0.134362	11.9783	0.00230164	42.81	383229	3.57182	2819	432.47	2.30164	23964	559.776	0.117635
2019	Shanyang County	0.694065	0.16741	12.1559	0.00224794	42.79	520929	3.37284	4122.92	408.272	2.24794	23964	560.037	0.172046
2020	Shanyang County	0.776503	0.192885	12.0596	0.00251385	36.18	456509	4.74772	4365.39	485.853	2.51385	23964	662.355	0.182164
2021	Shanyang County	0.371758	0.0828523	12.0298	0.00359318	29.57	390366	6.1226	1167.69	149.448	3.59318	21569	729.422	0.0541373
2012	Danfeng County	0.20473	0.0505738	10.971	0.00219067	31	156801	2.74194	1456.95	255.25	2.19067	12185	393.065	0.119569
2013	Danfeng County	0.101309	0.0238356	12.7101	0.00176007	31	173955	2.36129	56.2644	300.246	1.76007	12163	392.355	0.00462586
2014	Danfeng County	0.382507	0.100232	11.9498	0.00227267	31	195950	2.54645	529.148	323.79	2.27267	12163	392.355	0.0435047
2015	Danfeng County	0.454062	0.121457	12.0005	0.0021508	31	208279	2.79586	553.527	355.496	2.1508	12090	390	0.0457839
2016	Danfeng County	0.394541	0.09505	12.4545	0.0021766	31.47	205532	3.89692	568.864	398.811	2.1766	12118	385.065	0.0469437
2017	Danfeng County	0.40959	0.0943865	12.246	0.0027953	29.97	230975	3.34938	440.086	406.272	2.7953	12059	402.369	0.0364944
2018	Danfeng County	0.433603	0.0938556	11.9184	0.00218625	29.96	270065	3.27163	311.309	402.043	2.18625	12054	402.336	0.0258262
2019	Danfeng County	0.468919	0.108931	12.2242	0.0021966	29.93	387695	2.97176	182.531	364.82	2.1966	12049	402.573	0.0151491
2020	Danfeng County	0.54194	0.129015	12.0955	0.00241782	24.84	343039	4.61594	113.639	408.175	2.41782	12044	484.863	0.00943535
2021	Danfeng County	0.491692	0.126523	12.1019	0.00330944	19.75	288395	6.26012	8553.44	194.381	3.30944	14201	719.038	0.602312
2012	Shangnan County	0.164171	0.0420847	12.2644	0.00223363	24	151406	2.24667	176.558	233.723	2.23363	14153	589.708	0.0124749
2013	Shangnan County	0.169106	0.0438738	13.9388	0.00195846	25	163344	2.5356	3711.83	274.772	1.95846	14138	565.52	0.262543
2014	Shangnan County	0.29113	0.075607	13.2444	0.002304	25	180405	2.7568	3893.56	298.743	2.304	14126	565.04	0.275631
2015	Shangnan County	0.325924	0.0846013	13.1962	0.00221637	25	204575	3.524	472.828	330.776	2.21637	14038	561.52	0.033682
2016	Shangnan County	0.381891	0.100791	13.8033	0.00221383	24.79	203095	3.53126	4221.66	379.454	2.21383	14080	567.971	0.299834
2017	Shangnan County	0.360764	0.0888894	13.5788	0.00298611	22.55	220051	3.89812	3089.2	381.026	2.98611	14123	626.297	0.218736
2018	Shangnan County	0.384465	0.0950358	13.2159	0.00231814	22.54	249558	4.55679	1956.75	396.251	2.31814	14095	625.333	0.138825
2019	Shangnan County	0.442186	0.0954125	13.542	0.00250591	22.55	302595	3.61116	824.286	352.962	2.50591	14067	623.814	0.0585971
2020	Shangnan County	0.51311	0.101928	13.3217	0.00271506	20.48	284617	4.59258	8366.94	407.698	2.71506	14039	685.498	0.595978
2021	Shangnan County	0.740635	0.166295	13.3166	0.00336844	18.41	267249	5.574	3269.43	248.678	3.36844	24006	1303.97	0.136192
2012	Zhen’an County	0.185449	0.0471513	10.8921	0.002966	30	165662	2.26333	491.461	189.819	2.966	21559	718.633	0.0227961
2013	Zhen’an County	0.181636	0.0487576	12.533	0.00226962	30	179351	2.58333	1415.52	222.254	2.26962	21586	719.533	0.0655757
2014	Zhen’an County	0.297435	0.0577898	11.7389	0.00277792	30	200995	2.797	152.183	240.637	2.77792	21961	732.033	0.00692971
2015	Zhen’an County	0.388267	0.095614	11.9328	0.00260473	30	214935	2.993	1566.57	257.499	2.60473	21899	729.967	0.071536
2016	Zhen’an County	0.417742	0.0994535	12.2666	0.00229176	30.47	234659	3.47883	1623.34	303.986	2.29176	21746	713.686	0.0746499
2017	Zhen’an County	0.479537	0.105896	11.9814	0.00321994	28.01	248095	3.96998	1211.11	318.896	3.21994	21667	773.545	0.0558964
2018	Zhen’an County	0.533455	0.124312	11.7511	0.00280197	28	300157	3.78893	798.878	303.599	2.80197	21441	765.75	0.0372594
2019	Zhen’an County	0.620951	0.151113	11.7743	0.00290278	27.98	184795	3.1474	386.649	252.549	2.90278	21215	758.22	0.0182253
2020	Zhen’an County	0.69794	0.170368	11.7461	0.00305345	25.5	351628	3.93118	3216.39	287.405	3.05345	20989	823.098	0.153242
2021	Zhen’an County	0.5899	0.13035	11.8797	0.00446115	23.02	331255	4.71495	597.38	146.474	4.46115	8481	368.419	0.0704374
2012	Zhashui County	0.143001	0.0366373	9.82866	0.00275606	17	120330	3.58529	6294.79	267.677	2.75606	8481	498.882	0.742222
2013	Zhashui County	0.193044	0.04553	11.5639	0.00219938	16	130799	4.1125	2164.3	281.862	2.19938	8481	530.062	0.255194
2014	Zhashui County	0.349098	0.0848456	10.7116	0.00277124	16	134277	4.13562	2234.54	283.748	2.77124	8481	530.062	0.263476
2015	Zhashui County	0.471865	0.111885	10.9207	0.0027645	16	146775	4.67438	233.133	320.712	2.7645	8667	541.688	0.026899
2016	Zhashui County	0.575334	0.140415	11.1472	0.0024552	16.37	175435	4.5833	2431.27	321.527	2.4552	8684	530.483	0.279971
2017	Zhashui County	0.624987	0.152942	10.9634	0.00311806	15.72	176416	4.74325	3181.22	319.726	3.11806	8691	552.863	0.366036
2018	Zhashui County	0.627409	0.144677	10.6871	0.00276014	15.71	180294	5.32973	3931.17	359.048	2.76014	8692	553.278	0.452275
2019	Zhashui County	0.748546	0.182198	10.8293	0.00288312	15.71	232062	4.87256	4681.12	328.216	2.88312	8693	553.342	0.538493
2020	Zhashui County	0.797668	0.186185	10.7198	0.00288573	13.84	220381	7.28179	4881.84	417.11	2.88573	8694	628.179	0.561518
2021	Zhashui County	0.873989	0.206239	10.9271	0.0044311	11.97	213100	9.69102	7431.12	417.11	4.4311	8695	726.399	0.854643

## Sheet: Average annual temperature
		2012	2013	2014	2015	2016	2017	2018	2019	2020	2021
Xi’an City	Baqiao District	13.0109	14.6867	13.8822	13.9703	14.4933	14.1027	13.8741	13.8814	13.4952	13.7356
	Beilin District	#DIV/0!	#DIV/0!	#DIV/0!	#DIV/0!	#DIV/0!	#DIV/0!	#DIV/0!	#DIV/0!	#DIV/0!	#DIV/0!
	Gaoling District	14.8911	16.8518	15.9151	15.9507	16.5735	16.0439	16.0645	15.8387	15.2236	15.4665
	Huyi District	11.1247	12.6897	11.7542	12.0849	12.3288	12.1016	11.563	11.8835	11.5035	11.9951
	Lantian County	10.5008	12.1283	11.3581	11.4636	11.7601	11.5847	11.2888	11.4123	11.165	11.4453
	Lianhu District	13.4495	15.1861	14.3133	14.4414	14.983	14.5228	14.2579	14.3049	13.965	14.2018
	Lintong District	13.943	15.7913	14.9153	14.9601	15.5131	15.0499	15.0177	14.8678	14.4439	14.6789
	Weiyang District	14.4007	16.3699	15.3979	15.4372	16.0604	15.524	15.4026	15.2758	14.8703	15.067
	Xincheng District	13.4128	15.1557	14.3084	14.4114	14.9559	14.5104	14.297	14.2956	13.8739	14.1075
	Yanliang District	14.8082	16.6441	15.7115	15.8646	16.4675	15.9139	15.9325	15.7446	15.3432	15.6253
	Yanta District	13.2082	14.7185	13.9403	14.1078	14.637	14.2277	13.7808	14.0425	13.6414	13.8828
	Chang’an District	11.0347	12.599	11.7326	11.9838	12.2473	12.0376	11.6014	11.8426	11.4573	11.8708
	Zhouzhi County	9.7847	11.3538	10.4675	10.8985	11.003	10.8232	10.279	10.5203	10.1866	10.7394
Baoji City	Chencang District	9.88722	11.6679	10.8671	11.187	11.554	11.2192	10.764	10.7872	10.5352	10.92
	Feng County	8.54839	10.0599	9.254	9.70492	9.69318	9.59008	9.27021	9.33431	9.02772	9.47171
	Fengxiang District	10.9678	12.7246	11.9003	12.0899	12.5819	12.1852	11.7915	11.7489	11.5929	11.8239
	Fufeng County	12.268	13.8692	13.0489	13.1552	13.7904	13.3056	12.8238	12.9696	12.8398	13.0526
	Jintai District	12.0264	13.9052	13.1043	13.4109	13.927	13.4608	12.8998	12.9393	12.6084	12.8839
	Linyou County	10.3468	12.0653	11.2171	11.4315	11.7864	11.4866	11.2249	11.1692	10.9647	11.2773
	Long County	8.99294	10.7252	9.99992	10.3015	10.6721	10.3921	9.92996	9.97757	9.66812	10.1094
	Mei County	10.319	11.8603	11.0266	11.392	11.6744	11.3509	10.8787	11.0435	10.8999	11.3043
	Qishan County	11.2915	12.9733	12.1019	12.3033	12.8034	12.3951	11.9418	12.0173	11.9512	12.181
	Qianyang County	10.6316	12.4439	11.7181	11.896	12.3347	11.9803	11.681	11.5835	11.2494	11.5693
	Taibai County	7.02104	8.46079	7.58222	8.10761	8.03976	7.98012	7.55208	7.66931	7.50382	8.01397
	Weibin District	9.1551	10.8526	10.012	10.4277	10.6352	10.3799	9.90377	10.0165	9.64799	10.1215
Xianyang City	Binzhou City	10.6342	12.3819	11.4762	11.7621	12.0738	11.7619	11.577	11.5463	11.301	11.6005
	Chunhua County	10.9852	12.6978	11.8668	11.9546	12.4285	12.0952	11.9338	11.8576	11.7322	11.9707
	Jingyang County	14.1061	16.0821	15.1756	15.195	15.8157	15.2603	15.2003	15.0683	14.7596	14.9816
	Liquan County	12.8973	14.7036	13.8437	13.8722	14.5132	14.0293	13.7465	13.7359	13.5256	13.7576
	Qian County	12.7465	14.401	13.5637	13.6159	14.3364	13.8448	13.3453	13.4759	13.3266	13.5503
	Qindu District	13.5037	15.3286	14.3657	14.4849	15.0824	14.5607	14.2172	14.3049	13.9726	14.2268
	Sanyuan County	14.0559	16.021	15.1047	15.1485	15.7627	15.2392	15.2609	15.0808	14.6603	14.9059
	Weicheng District	13.9431	15.9011	14.9033	14.9585	15.5931	15.0449	14.8049	14.7885	14.4132	14.6164
	Wugong County	12.5265	14.0692	13.2363	13.4367	14.0582	13.5393	12.9976	13.2049	13.0502	13.3223
	Xingping City	13.149	14.8324	13.9102	14.0984	14.71	14.1838	13.7284	13.8902	13.6577	13.9378
	Xunyi County	9.51527	11.1604	10.2576	10.4501	10.7616	10.6196	10.3687	10.4433	10.3257	10.6569
	杨陵区	12.508	14.0537	13.2234	13.4606	14.0351	13.5025	13.0183	13.1901	13.1147	13.3947
	Yongshou County	11.2401	12.9697	12.1384	12.2486	12.7418	12.4203	12.0928	12.0722	12.0137	12.253
	Changwu County	10.9223	12.6855	11.8067	12.1268	12.405	12.0487	11.9236	11.904	11.6421	11.9108
Weinan City	Baishui County	11.9692	13.7219	12.8349	12.982	13.3864	13.2498	13.2251	13.282	12.8281	13.1648
	Chengcheng County	12.2893	14.1385	13.162	13.2113	13.5942	13.5168	13.514	13.6645	13.0523	13.3914
	Dali County	14.4988	16.2368	15.3243	15.4398	15.8802	15.6411	15.5314	15.7245	15.1236	15.4567
	Fuping County	13.2989	15.1208	14.2203	14.2653	14.9285	14.4732	14.435	14.3825	13.9404	14.3004
	Hancheng City	11.3636	13.2141	12.3418	12.5528	12.85	12.8822	12.8185	13.1306	12.425	12.748
	Heyang County	12.8533	14.7801	13.8177	13.7641	14.216	14.1655	14.1319	14.3602	13.76	14.0212
	Huayin City	12.0069	13.6998	12.8512	12.8899	13.2099	13.0578	12.8082	13.1256	12.696	12.9838
	Huazhou District	10.8216	12.4829	11.672	11.7369	12.023	11.8347	11.5817	11.7885	11.4389	11.7562
	Linwei District	13.7405	15.4935	14.6277	14.7578	15.2129	14.8181	14.7193	14.7143	14.3888	14.676
	Pucheng County	13.8569	15.6232	14.7094	14.819	15.3863	15.044	15.039	15.0585	14.4588	14.8514
	Tongguan County	12.9671	14.7644	13.8899	13.8385	14.22	14.1541	13.8428	14.2729	13.8574	14.0437
Yulin City	Dingbian County	7.77261	9.12316	8.49677	8.79893	8.84246	8.92475	8.71257	8.75357	8.37262	9.24545
	Fugu County	7.99456	9.37191	9.49197	9.60517	9.23949	9.71876	9.27645	9.67182	9.39423	9.85813
	Hengshan District	8.9049	10.2849	10.0795	10.3556	10.025	10.3097	10.0042	10.3193	9.93352	10.7608
	Jia County	9.19761	10.6988	10.5732	10.8559	10.4385	10.795	10.5093	10.96	10.4801	11.0424
	Jingbian County	7.97807	9.36654	8.85718	9.16886	9.04662	9.25178	8.96891	9.18356	8.70688	9.61652
	Mizhi County	9.23297	10.742	10.4614	10.8197	10.4497	10.7544	10.5326	10.9141	10.4467	11.0953
	Qingjian County	9.96379	11.5802	11.0465	11.5698	11.3165	11.5203	11.517	11.8168	11.0694	11.6387
	Shenmu City	8.08605	9.43732	9.59744	9.74809	9.2909	9.68297	9.21597	9.72722	9.4701	10.0294
	Suide County	9.61453	11.1886	10.7687	11.2707	10.9062	11.1728	11.0653	11.4252	10.8152	11.3886
	Wubu County	10.0827	11.7369	11.3361	11.8416	11.4634	11.77	11.6597	12.0545	11.307	11.8172
	Yuyang District	8.27353	9.61518	9.68426	9.82713	9.4008	9.69896	9.29324	9.73712	9.47624	10.213
	Zizhou County	9.40081	10.9464	10.5051	10.8963	10.6082	10.8652	10.7116	10.9878	10.4379	11.2177
Yan’an City	Ansai District	8.50387	10.0658	9.39682	9.77767	9.71761	9.88274	9.60555	9.8637	9.34856	10.1322
	Baota District	9.38033	10.9949	10.2639	10.7044	10.6469	10.8487	10.6668	10.8959	10.2591	10.9538
	Fu County	9.2834	10.8643	10.0368	10.3906	10.5014	10.6015	10.1845	10.5178	10.0459	10.5523
	Ganquan County	9.06838	10.6374	9.84833	10.2421	10.273	10.4199	10.0753	10.4031	9.88786	10.5124
	Huangling County	9.504	11.1259	10.2448	10.5478	10.7936	10.815	10.3834	10.6714	10.342	10.7372
	Huanglong County	9.14906	10.8144	9.86921	10.1758	10.3062	10.4184	10.1321	10.4699	10.0301	10.4813
	Luochuan County	9.84516	11.4679	10.6274	11.0043	11.0606	11.1621	10.8627	11.1379	10.6065	11.0551
	Wuqi County	7.67131	9.10656	8.3971	8.68968	8.79873	8.84291	8.62441	8.81927	8.24583	9.16068
	Yanchuan County	10.058	11.683	11.0721	11.5449	11.4067	11.6165	11.5944	11.8036	11.0598	11.6437
	Yanchang County	10.0715	11.6894	10.9966	11.5233	11.4429	11.6262	11.6002	11.8098	11.0717	11.5652
	Yichuan County	9.6499	11.2824	10.4654	10.9717	10.9995	11.1279	11.0544	11.3426	10.5604	10.9717
	Zhidan County	8.05747	9.57137	8.85279	9.21072	9.26205	9.36679	9.04626	9.30379	8.78721	9.55745
	Zichang City	9.08027	10.6385	10.0766	10.4739	10.2752	10.5262	10.3593	10.5699	9.99816	10.8172
Tongchuan City	Wangyi District	11.2619	13.0013	12.1658	12.1627	12.738	12.4497	12.2764	12.3169	11.9275	12.2861
	Yaozhou District	10.7369	12.4437	11.5949	11.6261	12.0884	11.8907	11.6822	11.7122	11.4749	11.7776
	Yijun County	10.0156	11.6586	10.8364	11.0747	11.4027	11.3297	11.0262	11.2498	10.8759	11.2367
	Yintai District	10.8543	12.5531	11.7209	11.7849	12.2997	12.0788	11.8704	11.9765	11.5525	11.9367
Hanzhong City	Chenggu County	12.084	13.422	12.7313	13.0978	13.3674	12.9988	12.8514	12.7018	12.7383	12.9039
	Foping County	9.41398	10.9097	10.1111	10.4485	10.5452	10.3516	9.97183	10.0334	9.91317	10.3524
	Hantai District	12.7276	14.055	13.3858	13.7594	14.0488	13.6333	13.5535	13.3321	13.2356	13.3821
	Liuba County	9.64703	11.1257	10.3499	10.7949	10.7983	10.6944	10.3775	10.3577	10.2759	10.5691
	Lueyang County	11.1197	12.534	11.9116	12.294	12.4862	12.3248	12.1019	11.9762	11.7717	11.9058
	Mian County	10.7415	12.065	11.3808	11.7954	11.9433	11.6789	11.5475	11.3863	11.3182	11.542
	Nanzheng District	11.364	12.7038	11.9428	12.4254	12.5784	12.2749	12.1066	12.009	12.0119	12.2108
	Ningqiang County	11.6533	12.9366	12.2695	12.7753	12.9055	12.7148	12.4884	12.3729	12.2692	12.4493
	Xixiang County	11.9781	13.4052	12.6097	12.8913	13.2815	12.9035	12.7873	12.6042	12.6332	12.778
	Yang County	11.4323	12.7446	12.0369	12.3206	12.6377	12.2811	12.0793	12.0005	12.0489	12.2602
	Zhenba County	11.0596	12.562	11.6751	12.0266	12.2454	12.0247	11.8462	11.7166	11.7445	12.0012
Ankang City	Baihe County	12.736	14.3148	13.494	13.5735	14.3515	13.9541	13.7202	13.7592	13.5671	13.6024
	Hanbin District	13.1646	14.855	13.9468	14.0447	14.7472	14.2868	14.1642	13.9997	13.8922	13.9592
	Hanyin County	12.9108	14.5535	13.7106	13.789	14.3937	14.0466	13.9139	13.6438	13.6035	13.6942
	Langao County	10.752	12.1658	11.4046	11.7533	11.9863	11.7634	11.5154	11.489	11.3978	11.7292
	Ningshan County	9.27667	10.7822	9.96342	10.2394	10.3358	10.1704	9.83155	9.94693	9.86461	10.2793
	Pingli County	11.2862	12.7098	11.934	12.2183	12.6295	12.3367	12.1054	12.1008	11.9698	12.2815
	Shiquan County	12.6366	14.205	13.4567	13.4842	14.0736	13.6886	13.5779	13.328	13.2396	13.3338
	Xunyang City	12.6094	14.3558	13.4849	13.5173	14.2984	13.8811	13.6643	13.6188	13.4963	13.5133
	Zhenping County	9.7065	11.0828	10.3455	10.7166	10.7873	10.7008	10.3564	10.4427	10.3382	10.8179
	Ziyang County	11.909	13.4579	12.5982	12.8725	13.233	12.9601	12.8066	12.6147	12.6045	12.8395
Shangluo City	Danfeng County	10.971	12.7101	11.9498	12.0005	12.4545	12.246	11.9184	12.2242	12.0955	12.1019
	Luonan County	9.97866	11.8533	11.0041	11.0367	11.3241	11.2514	10.9252	11.235	11.0115	11.1762
	Shanyang County	10.9798	12.7029	11.961	12.0554	12.5321	12.2435	11.9783	12.1559	12.0596	12.0298
	Shangnan County	12.2644	13.9388	13.2444	13.1962	13.8033	13.5788	13.2159	13.542	13.3217	13.3166
	Shangzhou District	10.1998	12.0244	11.2703	11.3427	11.6733	11.4968	11.2023	11.4193	11.2808	11.3498
	Zhashui County	9.82866	11.5639	10.7116	10.9207	11.1472	10.9634	10.6871	10.8293	10.7198	10.9271
	Zhen’an County	10.8921	12.533	11.7389	11.9328	12.2666	11.9814	11.7511	11.7743	11.7461	11.8797

## Sheet: Average annual precipitation
Regional Area	Gross Regional Product (10,000 yuan)
324.5	2333000
324.5	2690300
324.5	2933000
324.5	3322800
324.5	3297800
324.5	4283500
324.5	4807800
324.5	4891900
324.5	5420600
324.5	6068500
244.55	1414900
244.55	1689600
244.55	1947200
244.55	1918500
244.55	1939400
244.55	2402100
244.55	2501000
244.55	2550600
244.55	2491000
244.55	2648400
915.97	2115300
915.97	2265800
915.97	2314500
915.97	1923400
915.97	1831100
915.97	2210100
915.97	2375200
915.97	2426900
915.97	2525300
915.97	2623700
1580	3626400
1588	3691460
1588	4206958
1588	5126913
1588	6080200
1588	7910300
1588	9091100
1588	10012100
1588	11362500
1589	12694500
1969	957300
1969	1068900
2006	1184500
2006	1130800
2006	1224400
2006	1434900
2006	1578300
2005.95	1492300
2005.95	1429600
2005.95	1517000
2949	782800
2949	876600
2969	972000
2969	1040600
2969	1149900
2969	1342600
2969	1462700
2945.2	1371500
2945.2	1394400
2945.2	1463900
294	2281600
294	2799400
294	3000900
294	2914000
294	3002400
294	3771000
294	3784500
294	3744400
294	3744900
294	3847200
1282	1421300
1282	1552400
1282	1619600
1279	1508400
1279	1628200
1428	1974100
1248	2172600
1248	1802300
1248	2336100
1248	2660500
2472	1515400
2472	1629100
2472	1736400
2472	1477200
2472	1647800
2427	1913800
2427	2128441
2427	2144061
2427	2205587
2427	2413681
863	771900
857	905700
857	1046300
858	1069100
858	1155100
858	1289200
858	1369809
858	1612147
858	1770147
858	1997975
705	818500
705	951300
705	1005700
705	978700
705	1081600
705	1246500
705	1398717
705	1471413
705	1545066
705	1735681
1179	1430100
1179	1619600
1179	1818100
1179	1877600
1179	2020400
1179	2088500
1179	2167995
1179	2236551
1179	2397666
1179	2642959
856	1340100
856	1440900
856	1491000
856	1438500
856	1561100
856	1886300
856	1930974
856	1793382
856	1690945
856	1747059
2277	433000
2277	498800
2277	571600
2277	597800
2277	675500
2277	848200
2277	974213
2277	915529
2277	986618
2277	1088482
996	259400
997	310100
997	350600
997	411100
997	486600
997	543400
997	597588
997	676914
997	738229
997	820052
581	4071600
581	4272500
581	4457000
581	4699600
581	5005000
581	5311700
581	5463000
581	5211400
581	5353900
581	5496400
309	2412500
309	2757300
309	2954500
309	3042300
309	3385000
309	3578100
309	3706500
309	3649500
309	3625500
309	3601500
792	1180200
792	1350100
792	1520300
792	1602300
792	1790400
570	759600
570	754310
570	757300
570	808970
570	1167780
577	1204800
577	1408100
577	1601300
577	1776300
577	1935100
577	2360900
577	2397556
577	2153480
577	2077589
577	2360850
1011	1086200
1012	1278600
1012	1450200
1012	1518300
1012	1641500
1012	1741700
1012	1605154
1012	1535000
1012	1561800
1012	1721301
128.7	3300400
128.7	3752900
128.7	4250100
128.7	4665400
128.7	5196000
128.7	4010000
128.7	3828200
128.7	3438500
128.7	3619400
128.7	3800300
272	2664400
272	3052200
272	3164300
272	3130900
272	3449000
272	3039200
272	3787200
272	2565900
272	2745700
272	2925500
1003	1080900
1003	1272100
1003	1450400
1003	1507400
1003	1623800
1003	1789400
1003	1736460
1003	1716220
1003	1556210
1003	1758100
398	741400
398	959400
398	1100400
398	1124500
398	1232500
398	1409000
398	1412380
398	1531550
398	1545850
398	1713500
508	1452000
508	1752200
508	1827700
508	1916993
508	2176700
453	2411100
453	2483302
453	2416440
453	2421100
453	2809539
526	328000
526	387500
526	411000
526	365500
526	369000
526	457700
526	403487
526	441972
526	440851
526	473732
1139	1106900
1139	1144300
1139	1157500
1139	1080300
1139	882200
1139	949800
1139	756097
1139	993373
1139	965843
1139	1119800
817	676300
817	740600
817	783500
817	804200
817	700200
817	849600
817	911614
817	707898
817	724847
817	776000
1263.76	2625200
1263.76	2737400
1263.76	3037900
1263.76	3068100
1263.76	3326700
1263.76	3705200
1263.76	4196400
1263.76	4276100
1263.76	4418900
1263.76	4561700
1776	1005800
1776	1098400
1776	1123700
1776	1047300
1776	1159500
1776	1620400
1776	1505775
1776	1685611
1776	1755100
1776	1924624
1584	1300100
1584	1418700
1584	1516200
1584	1551600
1584	1631300
1584	1815300
1584	1906335
1584	1941567
1584	2035357
1584	2259974
1242	1001000
1242	1201200
1243	1355100
1243	1303500
1243	1373000
1242	1444800
1242	1659967
1242	1839644
1242	1930770
1242	2146643
7635	10038900
7635	9255400
7635	9682400
7635	8174100
7635	9048000
7635	11103300
7635	12980300
7635	13628777
7635	12940036
7635	18481700
7053	4010900
7053	4612600
7053	5085700
7053	5431000
7053	5567200
7053	6984700
7053	7772800
7053	9371400
7053	10010200
7053	10649000
4282	1042200
4282	1218500
4282	1360900
4282	1165100
4333	1211600
4333	1544600
4333	1894400
4333	2014700
4333	1994305
4333	2734700
5088	3170500
5088	3521600
5088	3651900
5088	2668400
5088	2449400
5088	3039100
5088	2962350
5088	3898506
5088	3633295
5088	4500225
6920	2910100
6920	3100800
6920	3383900
6920	2576300
6920	2300300
6920	2553200
6920	3172840
6920	3176191
6920	2631600
6920	3417158
3229	4505200
3229	4353800
3229	4365300
3229	3837600
3229	3925700
3201	4856300
3498	5395771
3201	6175064
3201	5828060
3201	7358846
2029	318600
2029	365600
2029	414700
2029	344400
2029	398000
2029	505100
2029	549186
2029	575895
2029	633332
2029	717500
418	137700
418	159900
418	178000
418	167600
418	179700
418	208800
428	234071
428	269128
421	286112
421	312865
1212	401200
1212	466400
1212	486600
1212	415300
1212	448400
1212	480000
1212	575800
1212	655712
1212	628700
1212	700700
1853	476200
1853	539500
1853	540900
1853	588700
1853	671500
1853	758700
1853	939738
1853	905484
1853	1001520
1853	1111707
2040	401600
2040	484000
2042	522600
2042	440300
2042	557100
2042	624600
2042	636324
2042	599600
2042	679304
2042	772800
1881	306800
1881	354600
1881	394000
1881	410500
1881	439100
1881	510800
1881	585700
1881	614100
1850	630830
1850	696500
3556	2033100
3556	2165700
3556	2433900
3556	2694000
3556	2551300
3556	2912300
3556	3289500
3556	3639100
3556	3685400
3556	3731700
2396	745600
2396	831300
2396	811200
2396	722200
2396	749700
2396	971900
2396	1145757
2396	1110650
2396	1000141
2396	1356686
1984	823800
1984	945600
1934	1001700
1985	704400
1985	681100
1985	806500
1985	1143557
1985	994370
1985	1017800
1985	1189725
2368	340900
2368	376700
2368	410900
2368	430000
2368	378200
2368	459900
2368	540779
2368	528700
2368	540600
2368	684939
2949	1057500
2949	1043200
2949	1064400
2949	971000
2950	766700
2949	913000
2949	1072200
2949	1146310
2949	1112604
2949	1457189
3794	1759800
3794	1678900
3794	1666200
3781	1341400
3781	1075900
3794	1329900
3794	1499800
3794	1615520
3794	1416695
3794	1964136
3789	2010700
3789	2097000
3789	2115100
3789	1404700
3789	1086500
3788	1353400
3788	1506676
3788	1787260
3788	1501324
3788	2104872
2272	205000
2272	213000
2272	224400
2272	216200
2272	205800
2272	234000
2272	266538
2272	290770
2272	288399
2272	330692
1792	2130400
1792	2473400
1792	2294400
1792	1854800
1792	1517300
1792	1497800
1792	2439861
1792	2438730
1792	2416417
1792	2790488
4180	301200
4180	324900
4180	389500
4180	409500
4180	447100
4180	529100
4180	626780
4180	663700
4180	723705
4180	831275
2287	1034000
2287	1085300
2287	1113600
2287	862000
2287	958400
2287	1198200
2287	1524078
2287	1859250
2287	1690104
2287	88600
2746	101600
2746	111100
2746	132700
2746	139600
2746	154200
2746	170300
2747	186690
2747	195301
2747	225344
2747	185800
2934	207800
2934	227200
2934	253200
2938	279200
2938	303200
2938	362603
2938	377830
2938	424045
2938	455735
2933	212100
1531	258400
1531	295400
1531	325300
1532	331100
1532	380500
1532	305630
1532	331865
1476	360810
1476	427400
1476	1275600
1543	1407100
1614	1507800
1614	1421100
1604	1275000
1604	1459800
1604	1333890
1604	1749100
1604	1897558
1604	2160840
1613	641200
162.2	731700
162.2	821600
162.2	838800
162.2	877400
162.2	1002300
162.2	872400
162.2	848200
162.2	927500
162.2	1006800
162.2	700200
629.54	822600
629.54	779400
629.54	660300
629.54	632600
629.54	643400
629.54	767500
629.54	617500
629.54	631600
629.54	645700
629.54	555000
960	612100
960	663000
960	615400
960	629700
960	722300
960	774973
978	845257
978	841442
978	936832
978	770700
1121	830100
1121	852900
1121	822600
1121	790400
1121	856900
1121	878458
1121	984934
1121	1035419
1122	1137248
1122	2332200
1621	2820600
1621	3030100
1621	3112900
1621	3203800
1621	3490000
1621	3689941
1621	3518557
1621	3384402
1621	3745198
1621	868400
1437	506900
1437	601000
1437	678500
1437	713900
1437	753100
1437	784700
1437	924500
1437	971800
1437	1049762
1437	1129682
1811	1022800
1811	1160200
1811	1049230
1774	1066300
1774	1220200
1811	965846
1811	883870
1811	892100
1811	1059300
1811	446200
567	525800
567	606100
567	688300
567	730000
568	959200
568	1004600
568	1022450
568	991500
568	1183200
568	348700
889	413300
889	448300
889	500000
889	586100
889	731100
889	854257
889	843570
889	846230
889	945940
889	1361800
1183	1654300
1181	1860900
1185	1700100
1184	1888200
1184	2136200
1184	2171140
1184	2311030
1184	2161430
1184	2701583
1184	426700
960	502500
982	535400
982	573800
983	649100
983	747800
983	760800
983	775200
983	820170
983	907400
983	411500
1704	505900
1704	557500
1704	644800
1704	711100
1704	1065400
1704	1097200
1704	1406100
1704	1282600
1704	1790000
1704	1108000
3187	1302100
3187	1456100
3187	1484500
3187	1707400
3187	1801000
3187	1337800
3187	776599
3187	798475
3187	914957
3187	137900
2698	158300
2698	171100
2698	196000
2698	209100
2968	224500
2698	276957
2698	302589
2698	374673
2698	455471
2698	602300
2831	658700
2831	631900
2831	504600
2831	559400
2831	675400
2831	723484
2831	711655
2831	638300
2831	697000
2831	485000
3260	558500
3260	619300
3260	641200
3260	715400
3260	833000
3260	890472
3260	1000117
3260	1066383
3260	1249922
3260	48300
1279	57900
1279	66500
1279	73200
1279	85600
1279	98000
1279	109026
1279	114767
1267	118813
1267	130502
1267	87800
1854	100700
1854	114200
1965	127700
1965	141100
1965	156900
1965	169218
1965	186946
1965	199000
1965	220500
1965	549600
3265	652000
3265	753800
3253	812000
3253	906900
3253	1017300
3253	1108536
3253	1167013
3253	1221203
3253	1339840
3253	405000
3414	481400
3414	564200
3437	583000
3437	651700
3437	785100
3437	845579
3437	924474
3437	829889
3437	946855
3437	1562900
556	1771400
556	2038900
556	2302500
556	2522700
556	2874000
556	3225400
556	3760600
556	3758000
556	3755400
556	965900
2382	1054400
2382	1114100
2406	1057500
2406	1011600
2406	1292700
2406	1473784
2406	1470256
2406	1609297
2406	1787398
2406	1149000
2824	1344600
2824	1540400
2824	1648800
2824	1740700
2824	1924300
2809	2168570
2809	2184111
2809	2255445
2809	2397475
2809	1203000
2265	1382900
2265	1688400
2265	1925200
2265	2172200
2265	2467400
2265	2603995
2265	2324408
2265	2514139
2265	2824379
2265	737500
3206	850500
3206	944000
3206	1002600
3206	1065300
3206	1209000
3206	1400625
3206	1631580
3206	1723561
3206	1929023
3206	1630300
3643	1874700
3643	2103900
3643	2337200
3643	2521600
3643	2909200
3643	3423600
3643	3809500
3643	3758200
3643	362300
3643	255600
1956	309600
1957	351100
1957	401300
1957	455300
1957	525500
1957	593565
1957	580189
1957	486901
1957	550004
1957	474200
1365	586100
1365	684400
1365	775000
1365	861600
1365	951900
1365	1076703
1365	1125018
1365	1001545
1365	1109114
1525	418500
1516	477900
1516	547600
1516	629800
1516	714300
1534	809600
1516	961924
1516	941383
1516	830204
1516	938900
3678	189300
3667	213500
3678	222200
3678	245200
3678	266200
3678	301600
3678	346916
3678	317203
3678	231580
3678	243400
3678	467000
2204	543800
2240	647900
2240	745800
2240	804800
2240	907700
2240	1036503
2240	1095914
2240	1005299
2240	1078442
2240	843100
3554	1000100
3541	1123700
3541	1240900
3541	1378300
3541	1598700
3541	1879857
3541	1870492
3541	1734798
3541	2007363
3541	402100
2647	505000
2648	605900
2648	679300
2648	772900
2648	875200
2648	996248
2648	1038998
2648	890956
2648	1040659
2648	120000
1497	129500
1502	120600
1502	135600
1502	152600
1503	191900
1502	230279
1502	243411
1502	237697
1502	261890
1502	339100
1455	415600
1453	482700
1453	524300
1453	595400
1453	675100
1453	791735
1453	798439
1453	710627
1453	792362
1453	986100
2672	1083500
2672	1176500
2672	1229000
2672	1360900
2672	1535100
2672	1535104
2672	1567480
2672	1415900
2672	1515730
2672	706900
2830	828400
2830	920600
2830	991700
2830	1133900
2830	1367000
2830	1406450
2830	1485570
2830	1185410
2830	1379080
2830	660700
3535	807800
3535	955100
3535	1040500
3535	1213000
3535	1443500
3535	1479530
3535	1528780
3535	1443240
3535	1717490
3535	528300
2438	622300
2438	732000
2438	789400
2438	866700
2438	972300
2438	990490
2438	980180
2438	889430
2438	995130
2438	473900
2307	539200
2307	633900
2307	689200
2307	763100
2307	875400
2307	879026
2307	914150
2307	814284
2307	940560
2307	573700
3487	661900
3487	775000
3487	839100
3487	897900
3487	1060000
3487	1111990
3487	1058650
3487	880640
3487	1002180
3488	510900
2277	609500
2277	641800
2332	661700
2332	747900
2332	749800
2332	745600
2332	837300
2332	765400
2332	972700
2332	972700

## Sheet: Intensity of fertilizer use
Average annual precipitation	xian	X(Total grain output(tons))	id	Total grain output	b31Agricultural Fertilizer Application）	Intensity of fertilizer use	Intensity of fertilizer use
2012	Baqiao District	61082	1	61082	24996	0.40922	0.40922
2013	Baqiao District	56370	1	56370	20944	0.371545	0.371545
2014	Baqiao District	52853	1	52853	20863	0.394736	0.394736
2015	Baqiao District	54071	1	54071	20851	0.385623	0.385623
2016	Baqiao District	52567	1	52567	18999	0.361424	0.361424
2017	Baqiao District	49645	1	49645	7484	0.15075	0.15075
2018	Baqiao District	27673	1	27673	7121	0.257327	0.257327
2019	Baqiao District	24684	1	24684	2352	0.0952844	0.0952844
2020	Baqiao District		1	21695	2729	0.125789	0.125789
2021	Baqiao District		1	18706	3106	0.166043	0.166043
2012	Yanliang District	81318	2	81318	19275	0.237032	0.237032
2013	Yanliang District	85369	2	85369	21696	0.254144	0.254144
2014	Yanliang District	81003	2	81003	24039	0.296767	0.296767
2015	Yanliang District	88211	2	88211	25050	0.283978	0.283978
2016	Yanliang District	86790	2	86790	25766	0.296878	0.296878
2017	Yanliang District	84826	2	84826	27921	0.329156	0.329156
2018	Yanliang District	120276	2	120276	28240	0.234793	0.234793
2019	Yanliang District	114974	2	114974	30042	0.261294	0.261294
2020	Yanliang District		2	109672	31599	0.288123	0.288123
2021	Yanliang District		2	104370	33156	0.317677	0.317677
2012	Lintong District	351676	3	351676	39101	0.111185	0.111185
2013	Lintong District	326809	3	326809	39256	0.120119	0.120119
2014	Lintong District	317870	3	317870	39641	0.124708	0.124708
2015	Lintong District	328636	3	328636	39813	0.121146	0.121146
2016	Lintong District	316894	3	316894	39949	0.126064	0.126064
2017	Lintong District	304775	3	304775	40008	0.131271	0.131271
2018	Lintong District	329083	3	329083	40674	0.123598	0.123598
2019	Lintong District	332607	3	332607	39222	0.117923	0.117923
2020	Lintong District		3	336131	46683	0.138883	0.138883
2021	Lintong District		3	339655	54144	0.159409	0.159409
2012	Chang’an District	368814	4	368814	30456	0.0825782	0.0825782
2013	Chang’an District	357700	4	357700	30124	0.0842158	0.0842158
2014	Chang’an District	338400	4	338400	29920	0.0884161	0.0884161
2015	Chang’an District	345885	4	345885	27318	0.07898	0.07898
2016	Chang’an District	332415	4	332415	21888	0.0658454	0.0658454
2017	Chang’an District	265260	4	265260	17602	0.0663575	0.0663575
2018	Chang’an District	156242	4	156242	16026	0.102572	0.102572
2019	Chang’an District	157518	4	157518	15572	0.0988585	0.0988585
2020	Chang’an District		4	158794	15118	0.0952051	0.0952051
2021	Chang’an District		4	160070	14664	0.0916099	0.0916099
2012	Lantian County	289759	5	289759	36350	0.125449	0.125449
2013	Lantian County	264600	5	264600	36091	0.136398	0.136398
2014	Lantian County	250600	5	250600	47017	0.187618	0.187618
2015	Lantian County	260422	5	260422	46208	0.177435	0.177435
2016	Lantian County	255720	5	255720	46235	0.180803	0.180803
2017	Lantian County	253850	5	253850	46769	0.184239	0.184239
2018	Lantian County	170353	5	170353	46737	0.274354	0.274354
2019	Lantian County	171041	5	171041	45932	0.268544	0.268544
2020	Lantian County		5	171729	45668	0.265931	0.265931
2021	Lantian County		5	172417	45404	0.263338	0.263338
2012	Zhouzhi County	243158	6	243158	46965	0.193146	0.193146
2013	Zhouzhi County	230700	6	230700	46989	0.20368	0.20368
2014	Zhouzhi County	224955	6	224955	33755	0.150052	0.150052
2015	Zhouzhi County	231714	6	231714	48221	0.208106	0.208106
2016	Zhouzhi County	222595	6	222595	52778	0.237103	0.237103
2017	Zhouzhi County	206556	6	206556	52752	0.255388	0.255388
2018	Zhouzhi County	119095	6	119095	52774	0.443125	0.443125
2019	Zhouzhi County	120206	6	120206	52414	0.436035	0.436035
2020	Zhouzhi County		6	121317	52412	0.432025	0.432025
2021	Zhouzhi County		6	122428	52410	0.428088	0.428088
2012	Gaoling District	200246	7	200246	106535	0.532021	0.532021
2013	Gaoling District	198200	7	198200	76274	0.384834	0.384834
2014	Gaoling District	190374	7	190374	46013	0.241698	0.241698
2015	Gaoling District	192757	7	192757	15752	0.0817195	0.0817195
2016	Gaoling District	187779	7	187779	14005	0.0745824	0.0745824
2017	Gaoling District	179220	7	179220	13885	0.0774746	0.0774746
2018	Gaoling District	123558	7	123558	13297	0.107617	0.107617
2019	Gaoling District	122926	7	122926	12802	0.104144	0.104144
2020	Gaoling District		7	122294	12307	0.100635	0.100635
2021	Gaoling District		7	121662	11812	0.0970887	0.0970887
2012	Huyi District	313700	8	313700	43780	0.13956	0.13956
2013	Huyi District	303400	8	303400	41416	0.136506	0.136506
2014	Huyi District	296007	8	296007	39052	0.131929	0.131929
2015	Huyi District	304943	8	304943	36688	0.120311	0.120311
2016	Huyi District	297776	8	297776	34324	0.115268	0.115268
2017	Huyi District	269000	8	269000	31960	0.11881	0.11881
2018	Huyi District	191315	8	191315	31751	0.165962	0.165962
2019	Huyi District	195893	8	195893	30730	0.156871	0.156871
2020	Huyi District		8	200471	30690	0.153089	0.153089
2021	Huyi District		8	205049	30650	0.149476	0.149476
2012	Chencang District	240560	9	240560	31252	0.129914	0.129914
2013	Chencang District	231078	9	231078	31402	0.135894	0.135894
2014	Chencang District	224800	9	224800	30721	0.136659	0.136659
2015	Chencang District	233370	9	233370	31190	0.13365	0.13365
2016	Chencang District	226699	9	226699	31052	0.136975	0.136975
2017	Chencang District	224139	9	224139	31731	0.141568	0.141568
2018	Chencang District	197274	9	197274	32585	0.165176	0.165176
2019	Chencang District	203032	9	203032	30394	0.149701	0.149701
2020	Chencang District		9	208790	28203	0.135078	0.135078
2021	Chencang District		9	214548	26012	0.121241	0.121241
2012	Mei County	134187	10	134187	40480	0.301669	0.301669
2013	Mei County	126030	10	126030	41394	0.328446	0.328446
2014	Mei County	126173	10	126173	41974	0.33267	0.33267
2015	Mei County	123284	10	123284	43974	0.356689	0.356689
2016	Mei County	117587	10	117587	44025	0.374404	0.374404
2017	Mei County	116083	10	116083	44096	0.379866	0.379866
2018	Mei County	72501	10	72501	44556	0.614557	0.614557
2019	Mei County	73228	10	73228	44641	0.609617	0.609617
2020	Mei County		10	73955	44726	0.604773	0.604773
2021	Mei County		10	74682	44811	0.600024	0.600024
2012	Fufeng County	280526	11	280526	54736	0.195119	0.195119
2013	Fufeng County	273050	11	273050	52866	0.193613	0.193613
2014	Fufeng County	265514	11	265514	50924	0.191794	0.191794
2015	Fufeng County	280898	11	280898	50504	0.179795	0.179795
2016	Fufeng County	272954	11	272954	49933	0.182936	0.182936
2017	Fufeng County	269563	11	269563	48329	0.179286	0.179286
2018	Fufeng County	257351	11	257351	48616	0.188909	0.188909
2019	Fufeng County	256168	11	256168	48474	0.189227	0.189227
2020	Fufeng County		11	254985	48332	0.189548	0.189548
2021	Fufeng County		11	253802	48190	0.189872	0.189872
2012	Fengxiang District	270408	12	270408	37833	0.139911	0.139911
2013	Fengxiang District	260048	12	260048	39781	0.152976	0.152976
2014	Fengxiang District	256353	12	256353	42299	0.165003	0.165003
2015	Fengxiang District	264037	12	264037	43274	0.163894	0.163894
2016	Fengxiang District	256439	12	256439	43220	0.168539	0.168539
2017	Fengxiang District	253150	12	253150	43400	0.17144	0.17144
2018	Fengxiang District	256816	12	256816	43089	0.167782	0.167782
2019	Fengxiang District	255007	12	255007	42975	0.168525	0.168525
2020	Fengxiang District		12	253198	42861	0.169279	0.169279
2021	Fengxiang District		12	251389	42747	0.170043	0.170043
2012	Qishan County	275099	13	275099	22623	0.0822358	0.0822358
2013	Qishan County	265060	13	265060	24680	0.093111	0.093111
2014	Qishan County	265783	13	265783	24571	0.0924476	0.0924476
2015	Qishan County	270048	13	270048	24990	0.0925391	0.0925391
2016	Qishan County	262308	13	262308	24652	0.0939811	0.0939811
2017	Qishan County	258649	13	258649	24404	0.0943518	0.0943518
2018	Qishan County	226246	13	226246	24214	0.107025	0.107025
2019	Qishan County	223824	13	223824	24667	0.110207	0.110207
2020	Qishan County		13	221402	25120	0.113459	0.113459
2021	Qishan County		13	218980	25573	0.116782	0.116782
2012	Long County	110803	14	110803	12711	0.114717	0.114717
2013	Long County	101012	14	101012	13277	0.13144	0.13144
2014	Long County	100101	14	100101	13492	0.134784	0.134784
2015	Long County	105230	14	105230	13609	0.129326	0.129326
2016	Long County	103314	14	103314	13493	0.130602	0.130602
2017	Long County	100000	14	100000	14488	0.14488	0.14488
2018	Long County	103672	14	103672	14520	0.140057	0.140057
2019	Long County	104296	14	104296	14189	0.136045	0.136045
2020	Long County		14	104920	13858	0.132082	0.132082
2021	Long County		14	105544	13527	0.128165	0.128165
2012	Qianyang County	61280	15	61280	11709	0.191074	0.191074
2013	Qianyang County	55053	15	55053	12602	0.228907	0.228907
2014	Qianyang County	56297	15	56297	12955	0.230119	0.230119
2015	Qianyang County	58908	15	58908	12551	0.213061	0.213061
2016	Qianyang County	56707	15	56707	12363	0.218015	0.218015
2017	Qianyang County	55023	15	55023	12325	0.223997	0.223997
2018	Qianyang County	57455	15	57455	11804	0.205448	0.205448
2019	Qianyang County	57179	15	57179	12448	0.217702	0.217702
2020	Qianyang County		15	56903	13092	0.230076	0.230076
2021	Qianyang County		15	56627	13736	0.24257	0.24257
2012	Weibin District	26527	16	26527	7224	0.272326	0.272326
2013	Weibin District	22000	16	22000	7378	0.335364	0.335364
2014	Weibin District	20000	16	20000	7231	0.36155	0.36155
2015	Weibin District	19896	16	19896	2072	0.104142	0.104142
2016	Weibin District	15866	16	15866	5010	0.31577	0.31577
2017	Weibin District	13512	16	13512	5149	0.381069	0.381069
2018	Weibin District	11788	16	11788	4676	0.396675	0.396675
2019	Weibin District	10127	16	10127	4217	0.416412	0.416412
2020	Weibin District		16	8466	3758	0.443893	0.443893
2021	Weibin District		16	6805	3299	0.484791	0.484791
2012	Jintai District	36787	17	36787	6221	0.169109	0.169109
2013	Jintai District	34114	17	34114	6146	0.180161	0.180161
2014	Jintai District	33019	17	33019	5431	0.164481	0.164481
2015	Jintai District	36866	17	36866	5081	0.137823	0.137823
2016	Jintai District	35591	17	35591	4736	0.133067	0.133067
2017	Jintai District	35000	17	35000	4781	0.1366	0.1366
2018	Jintai District	38269	17	38269	4489	0.117301	0.117301
2019	Jintai District	35696	17	35696	4489	0.125756	0.125756
2020	Jintai District		17	33123	4489	0.135525	0.135525
2021	Jintai District		17	30550	4489	0.146939	0.146939
2012	Jingyang County	257271	18	257271	40253	0.156461	0.156461
2013	Jingyang County	242444	18	242444	38800	0.160037	0.160037
2014	Jingyang County	239839	18	239839	36610	0.152644	0.152644
2015	Jingyang County	247212	18	247212	34150	0.138141	0.138141
2016	Jingyang County	240797	18	240797	34772	0.144404	0.144404
2017	Jingyang County	163222	18	163222	25168	0.154195	0.154195
2018	Jingyang County	161015	18	161015	22190	0.137813	0.137813
2019	Jingyang County	161058	18	161058	27248	0.169181	0.169181
2020	Jingyang County		18	161101	32306	0.200533	0.200533
2021	Jingyang County		18	161144	37364	0.231867	0.231867
2012	Sanyuan County	206504	19	206504	32220	0.156026	0.156026
2013	Sanyuan County	200001	19	200001	32300	0.161499	0.161499
2014	Sanyuan County	195125	19	195125	28160	0.144318	0.144318
2015	Sanyuan County	201111	19	201111	29024	0.144318	0.144318
2016	Sanyuan County	196010	19	196010	28268	0.144217	0.144217
2017	Sanyuan County	194981	19	194981	29175	0.14963	0.14963
2018	Sanyuan County	188916	19	188916	28542	0.151083	0.151083
2019	Sanyuan County	188519	19	188519	29203	0.154907	0.154907
2020	Sanyuan County		19	188122	29864	0.158748	0.158748
2021	Sanyuan County		19	187725	30525	0.162605	0.162605
2012	Liquan County	128485	20	128485	92700	0.721485	0.721485
2013	Liquan County	123113	20	123113	110800	0.899986	0.899986
2014	Liquan County	120041	20	120041	108311	0.902283	0.902283
2015	Liquan County	125138	20	125138	106940	0.854577	0.854577
2016	Liquan County	121414	20	121414	98691	0.812847	0.812847
2017	Liquan County	120158	20	120158	89582	0.745535	0.745535
2018	Liquan County	115859	20	115859	82455	0.711684	0.711684
2019	Liquan County	112282	20	112282	83255	0.741481	0.741481
2020	Liquan County		20	108705	84055	0.77324	0.77324
2021	Liquan County		20	105128	84855	0.807159	0.807159
2012	Qindu District	70388	21	70388	15140	0.215093	0.215093
2013	Qindu District	62770	21	62770	14189	0.226047	0.226047
2014	Qindu District	58922	21	58922	13447	0.228217	0.228217
2015	Qindu District	60011	21	60011	13434	0.223859	0.223859
2016	Qindu District	56118	21	56118	13158	0.23447	0.23447
2017	Qindu District	30056	21	30056	7863	0.261612	0.261612
2018	Qindu District	24834	21	24834	7483	0.301321	0.301321
2019	Qindu District	24752	21	24752	6931	0.280018	0.280018
2020	Qindu District		21	24670	6379	0.258573	0.258573
2021	Qindu District		21	24588	5827	0.236986	0.236986
2012	Weicheng District	107594	22	107594	10039	0.0933045	0.0933045
2013	Weicheng District	97237	22	97237	9615	0.0988821	0.0988821
2014	Weicheng District	92962	22	92962	8393	0.0902842	0.0902842
2015	Weicheng District	94916	22	94916	9187	0.0967908	0.0967908
2016	Weicheng District	88941	22	88941	8661	0.0973792	0.0973792
2017	Weicheng District		22	82966	8135	0.0980522	0.0980522
2018	Weicheng District		22	76991	7609	0.0988297	0.0988297
2019	Weicheng District		22	71016	7083	0.0997381	0.0997381
2020	Weicheng District		22	65041	6557	0.100813	0.100813
2021	Weicheng District		22	59066	6031	0.102106	0.102106
2012	Qian County	268199	23	268199	274558	1.02371	1.02371
2013	Qian County	253101	23	253101	275625	1.08899	1.08899
2014	Qian County	267077	23	267077	90307	0.338131	0.338131
2015	Qian County	262897	23	262897	91008	0.346174	0.346174
2016	Qian County	255915	23	255915	91502	0.357548	0.357548
2017	Qian County	251617	23	251617	112176	0.44582	0.44582
2018	Qian County	254480	23	254480	111760	0.43917	0.43917
2019	Qian County	249713	23	249713	111663	0.447165	0.447165
2020	Qian County		23	244946	111566	0.455472	0.455472
2021	Qian County		23	240179	111469	0.464108	0.464108
2012	Wugong County	210562	24	210562	29694	0.141023	0.141023
2013	Wugong County	200000	24	200000	28548	0.14274	0.14274
2014	Wugong County	197222	24	197222	26703	0.135396	0.135396
2015	Wugong County	203144	24	203144	26663	0.131252	0.131252
2016	Wugong County	198003	24	198003	26647	0.134579	0.134579
2017	Wugong County	194191	24	194191	26629	0.137128	0.137128
2018	Wugong County	194795	24	194795	26615	0.136631	0.136631
2019	Wugong County	197849	24	197849	26625	0.134572	0.134572
2020	Wugong County		24	200903	26635	0.132576	0.132576
2021	Wugong County		24	203957	26645	0.13064	0.13064
2012	Xingping City	222957	25	222957	16768	0.0752073	0.0752073
2013	Xingping City	222003	25	222003	16923	0.0762287	0.0762287
2014	Xingping City	216995	25	216995	16927	0.0780064	0.0780064
2015	Xingping City	224011	25	224011	16927	0.0755633	0.0755633
2016	Xingping City	218147	25	218147	16874	0.0773515	0.0773515
2017	Xingping City	194671	25	194671	15058	0.077351	0.077351
2018	Xingping City	186668	25	186668	14156	0.0758352	0.0758352
2019	Xingping City	189432	25	189432	15503	0.0818394	0.0818394
2020	Xingping City		25	192196	16850	0.0876709	0.0876709
2021	Xingping City		25	194960	18197	0.0933371	0.0933371
2012	Tongguan County	46481	26	46481	10715	0.230524	0.230524
2013	Tongguan County	43100	26	43100	11839	0.274687	0.274687
2014	Tongguan County	41009	26	41009	11506	0.280573	0.280573
2015	Tongguan County	45339	26	45339	11621	0.256314	0.256314
2016	Tongguan County	44039	26	44039	11619	0.263834	0.263834
2017	Tongguan County	44056	26	44056	10601	0.240626	0.240626
2018	Tongguan County	44324	26	44324	9632	0.217309	0.217309
2019	Tongguan County	42363	26	42363	9374	0.221278	0.221278
2020	Tongguan County		26	40402	9116	0.225632	0.225632
2021	Tongguan County		26	38441	8858	0.230431	0.230431
2012	Huazhou District	119562	27	119562	26827	0.224377	0.224377
2013	Huazhou District	112300	27	112300	26879	0.23935	0.23935
2014	Huazhou District	110102	27	110102	26931	0.2446	0.2446
2015	Huazhou District	117639	27	117639	26983	0.229371	0.229371
2016	Huazhou District	114575	27	114575	27035	0.235959	0.235959
2017	Huazhou District	114008	27	114008	27001	0.236834	0.236834
2018	Huazhou District	136700	27	136700	26968	0.197279	0.197279
2019	Huazhou District	139736	27	139736	26965	0.192971	0.192971
2020	Huazhou District		27	142772	26939	0.188685	0.188685
2021	Huazhou District		27	145808	26913	0.184578	0.184578
2012	Huayin City	80480	28	80480	5380	0.0668489	0.0668489
2013	Huayin City	78100	28	78100	5376	0.0688348	0.0688348
2014	Huayin City	75000	28	75000	7588	0.101173	0.101173
2015	Huayin City	82176	28	82176	7668	0.0933119	0.0933119
2016	Huayin City	78519	28	78519	7698	0.09804	0.09804
2017	Huayin City	80004	28	80004	7699	0.0962327	0.0962327
2018	Huayin City	109863	28	109863	7698	0.0700691	0.0700691
2019	Huayin City	108339	28	108339	7696	0.0710363	0.0710363
2020	Huayin City		28	106815	7756	0.0726115	0.0726115
2021	Huayin City		28	105291	7816	0.0742324	0.0742324
2012	Linwei District	367542	29	367542	58223	0.158412	0.158412
2013	Linwei District	337679	29	337679	58292	0.172625	0.172625
2014	Linwei District	333084	29	333084	67203	0.20176	0.20176
2015	Linwei District	349473	29	349473	69224	0.198081	0.198081
2016	Linwei District	342034	29	342034	66943	0.19572	0.19572
2017	Linwei District	342311	29	342311	67834	0.198165	0.198165
2018	Linwei District	363987	29	363987	68075	0.187026	0.187026
2019	Linwei District	297441	29	297441	61961	0.208314	0.208314
2020	Linwei District		29	230895	70622	0.305862	0.305862
2021	Linwei District		29	164349	79283	0.482406	0.482406
2012	Dali County	290151	30	290151	71094	0.245024	0.245024
2013	Dali County	278100	30	278100	74135	0.266577	0.266577
2014	Dali County	270535	30	270535	82593	0.305295	0.305295
2015	Dali County	283119	30	283119	87380	0.308633	0.308633
2016	Dali County	275547	30	275547	92142	0.334397	0.334397
2017	Dali County	278689	30	278689	86202	0.309313	0.309313
2018	Dali County	296788	30	296788	83273	0.280581	0.280581
2019	Dali County	306810	30	306810	80019	0.26081	0.26081
2020	Dali County		30	316832	77814	0.2456	0.2456
2021	Dali County		30	326854	75609	0.231323	0.231323
2012	Pucheng County	360256	31	360256	62180	0.172599	0.172599
2013	Pucheng County	330097	31	330097	62545	0.189475	0.189475
2014	Pucheng County	325337	31	325337	67727	0.208175	0.208175
2015	Pucheng County	352164	31	352164	66763	0.189579	0.189579
2016	Pucheng County	342191	31	342191	66327	0.19383	0.19383
2017	Pucheng County	345384	31	345384	65320	0.189123	0.189123
2018	Pucheng County	377849	31	377849	65484	0.173307	0.173307
2019	Pucheng County	375765	31	375765	60259	0.160364	0.160364
2020	Pucheng County		31	373681	59838	0.160131	0.160131
2021	Pucheng County		31	371597	59417	0.159896	0.159896
2012	Fuping County	380052	32	380052	224494	0.590693	0.590693
2013	Fuping County	360006	32	360006	234753	0.652081	0.652081
2014	Fuping County	355004	32	355004	264735	0.745724	0.745724
2015	Fuping County	370656	32	370656	282832	0.763058	0.763058
2016	Fuping County	360202	32	360202	300944	0.835487	0.835487
2017	Fuping County	360364	32	360364	301907	0.837783	0.837783
2018	Fuping County	377887	32	377887	302084	0.799403	0.799403
2019	Fuping County	380305	32	380305	57454	0.151073	0.151073
2020	Fuping County		32	382723	57440	0.150082	0.150082
2021	Fuping County		32	385141	57426	0.149104	0.149104
2012	Shenmu City	121133	33	121133	9020	0.0744636	0.0744636
2013	Shenmu City	123983	33	123983	8786	0.0708646	0.0708646
2014	Shenmu City	124121	33	124121	8552	0.0689005	0.0689005
2015	Shenmu City	122762	33	122762	8318	0.0677571	0.0677571
2016	Shenmu City	125266	33	125266	8084	0.0645347	0.0645347
2017	Shenmu City	129924	33	129924	7850	0.0604199	0.0604199
2018	Shenmu City	248901	33	248901	7616	0.0305985	0.0305985
2019	Shenmu City	253621	33	253621	12438	0.0490417	0.0490417
2020	Shenmu City		33	258341	17260	0.0668109	0.0668109
2021	Shenmu City		33	263061	50545	0.192142	0.192142
2012	Yuyang District	243070	34	243070	21406	0.0880652	0.0880652
2013	Yuyang District	237364	34	237364	23090	0.0972768	0.0972768
2014	Yuyang District	239639	34	239639	23922	0.0998252	0.0998252
2015	Yuyang District	218894	34	218894	22877	0.104512	0.104512
2016	Yuyang District	239738	34	239738	22908	0.0955543	0.0955543
2017	Yuyang District	242138	34	242138	22900	0.0945742	0.0945742
2018	Yuyang District	449443	34	449443	38100	0.0847716	0.0847716
2019	Yuyang District	451707	34	451707	37707	0.0834767	0.0834767
2020	Yuyang District		34	453971	37314	0.0821947	0.0821947
2021	Yuyang District		34	456235	36921	0.0809254	0.0809254
2012	Hengshan District	152742	35	152742	14993	0.098159	0.098159
2013	Hengshan District	156732	35	156732	11842	0.0755557	0.0755557
2014	Hengshan District	158008	35	158008	11881	0.0751924	0.0751924
2015	Hengshan District	156000	35	156000	11894	0.0762436	0.0762436
2016	Hengshan District	167004	35	167004	12026	0.0720103	0.0720103
2017	Hengshan District	176943	35	176943	12239	0.0691692	0.0691692
2018	Hengshan District	266817	35	266817	12430	0.0465862	0.0465862
2019	Hengshan District	267297	35	267297	12488	0.0467196	0.0467196
2020	Hengshan District		35	267777	12546	0.0468524	0.0468524
2021	Hengshan District		35	268257	12604	0.0469848	0.0469848
2012	Jingbian County	229713	36	229713	8791	0.0382695	0.0382695
2013	Jingbian County	231758	36	231758	8483	0.0366028	0.0366028
2014	Jingbian County	237461	36	237461	8891	0.0374419	0.0374419
2015	Jingbian County	215168	36	215168	8590	0.0399223	0.0399223
2016	Jingbian County	235810	36	235810	12049	0.0510962	0.0510962
2017	Jingbian County	255321	36	255321	16724	0.0655019	0.0655019
2018	Jingbian County	328656	36	328656	12100	0.0368166	0.0368166
2019	Jingbian County	319516	36	319516	12149	0.0380231	0.0380231
2020	Jingbian County		36	310376	12198	0.0393007	0.0393007
2021	Jingbian County		36	301236	27784	0.0922333	0.0922333
2012	Dingbian County	282210	37	282210	30142	0.106807	0.106807
2013	Dingbian County	293789	37	293789	32500	0.110624	0.110624
2014	Dingbian County	298472	37	298472	30184	0.101128	0.101128
2015	Dingbian County	270551	37	270551	29881	0.110445	0.110445
2016	Dingbian County	298428	37	298428	29344	0.0983286	0.0983286
2017	Dingbian County	292126	37	292126	34221	0.117145	0.117145
2018	Dingbian County	375044	37	375044	34226	0.0912586	0.0912586
2019	Dingbian County	374273	37	374273	34054	0.0909871	0.0909871
2020	Dingbian County		37	373502	33882	0.0907144	0.0907144
2021	Dingbian County		37	372731	14772	0.0396318	0.0396318
2012	Fugu County	68411	38	68411	6104	0.0892254	0.0892254
2013	Fugu County	65176	38	65176	6064	0.0930404	0.0930404
2014	Fugu County	67214	38	67214	6060	0.0901598	0.0901598
2015	Fugu County	32388	38	32388	5570	0.171977	0.171977
2016	Fugu County	58391	38	58391	7300	0.125019	0.125019
2017	Fugu County	60521	38	60521	6900	0.11401	0.11401
2018	Fugu County	69446	38	69446	5861	0.0843965	0.0843965
2019	Fugu County	69453	38	69453	5401	0.0777648	0.0777648
2020	Fugu County		38	69460	4941	0.0711345	0.0711345
2021	Fugu County		38	69467	4481	0.0645054	0.0645054
2012	Jia County	70730	39	70730	18334	0.259211	0.259211
2013	Jia County	72629	39	72629	3376	0.0464828	0.0464828
2014	Jia County	76731	39	76731	4091	0.0533161	0.0533161
2015	Jia County	75530	39	75530	4160	0.0550775	0.0550775
2016	Jia County	76662	39	76662	3495	0.0455897	0.0455897
2017	Jia County	87436	39	87436	3159	0.0361293	0.0361293
2018	Jia County	197980	39	197980	3206	0.0161936	0.0161936
2019	Jia County	198396	39	198396	3238	0.0163209	0.0163209
2020	Jia County		39	198812	3270	0.0164477	0.0164477
2021	Jia County		39	199228	952	0.00477844	0.00477844
2012	Wubu County	17754	40	17754	954	0.0537344	0.0537344
2013	Wubu County	18227	40	18227	956	0.0524497	0.0524497
2014	Wubu County	18816	40	18816	957	0.050861	0.050861
2015	Wubu County	18460	40	18460	957	0.0518418	0.0518418
2016	Wubu County	22925	40	22925	931	0.0406107	0.0406107
2017	Wubu County	25778	40	25778	907	0.035185	0.035185
2018	Wubu County	55558	40	55558	907	0.0163253	0.0163253
2019	Wubu County	55619	40	55619	906	0.0162894	0.0162894
2020	Wubu County		40	55680	905	0.0162536	0.0162536
2021	Wubu County		40	55741	3624	0.065015	0.065015
2012	Mizhi County	83438	41	83438	5117	0.061327	0.061327
2013	Mizhi County	85418	41	85418	5241	0.0613571	0.0613571
2014	Mizhi County	88080	41	88080	5237	0.0594573	0.0594573
2015	Mizhi County	87426	41	87426	5243	0.0599707	0.0599707
2016	Mizhi County	100218	41	100218	5244	0.0523259	0.0523259
2017	Mizhi County	106311	41	106311	5239	0.0492799	0.0492799
2018	Mizhi County	133897	41	133897	5237	0.0391122	0.0391122
2019	Mizhi County	133964	41	133964	5284	0.0394434	0.0394434
2020	Mizhi County		41	134031	5331	0.0397744	0.0397744
2021	Mizhi County		41	134098	33292	0.248266	0.248266
2012	Suide County	87932	42	87932	14854	0.168926	0.168926
2013	Suide County	87412	42	87412	14936	0.170869	0.170869
2014	Suide County	89895	42	89895	15013	0.167006	0.167006
2015	Suide County	83902	42	83902	14941	0.178077	0.178077
2016	Suide County	90981	42	90981	14959	0.164419	0.164419
2017	Suide County	95077	42	95077	14827	0.155947	0.155947
2018	Suide County	243294	42	243294	14870	0.0611195	0.0611195
2019	Suide County	243829	42	243829	14635	0.0600216	0.0600216
2020	Suide County		42	244364	14400	0.0589285	0.0589285
2021	Suide County		42	244899	4993	0.020388	0.020388
2012	Zizhou County	110985	43	110985	14364	0.129423	0.129423
2013	Zizhou County	102361	43	102361	14327	0.139965	0.139965
2014	Zizhou County	105898	43	105898	14343	0.135442	0.135442
2015	Zizhou County	70489	43	70489	14342	0.203464	0.203464
2016	Zizhou County	101312	43	101312	14497	0.143093	0.143093
2017	Zizhou County	104062	43	104062	14571	0.140022	0.140022
2018	Zizhou County	183804	43	183804	14482	0.0787905	0.0787905
2019	Zizhou County	177914	43	177914	14449	0.0812134	0.0812134
2020	Zizhou County		43	172024	14416	0.0838023	0.0838023
2021	Zizhou County		43	166134	9254	0.055702	0.055702
2012	Qingjian County	71759	44	71759	4512	0.0628771	0.0628771
2013	Qingjian County	72893	44	72893	5400	0.0740812	0.0740812
2014	Qingjian County	75119	44	75119	5207	0.0693167	0.0693167
2015	Qingjian County	84449	44	84449	5323	0.0630321	0.0630321
2016	Qingjian County	79135	44	79135	5327	0.0673153	0.0673153
2017	Qingjian County	83284	44	83284	5328	0.0639739	0.0639739
2018	Qingjian County	109012	44	109012	5066	0.0464719	0.0464719
2019	Qingjian County	109219	44	109219	5069	0.0464113	0.0464113
2020	Qingjian County		44	109426	5072	0.046351	0.046351
2021	Qingjian County		44	109633	14401	0.131356	0.131356
2012	Baota District	90198	45	90198	7291	0.0808333	0.0808333
2013	Baota District	85023	45	85023	7275	0.0855651	0.0855651
2014	Baota District	89917	45	89917	7424	0.082565	0.082565
2015	Baota District	88917	45	88917	7447	0.0837523	0.0837523
2016	Baota District	90011	45	90011	7373	0.0819122	0.0819122
2017	Baota District	92859	45	92859	7272	0.0783123	0.0783123
2018	Baota District	72326	45	72326	7140	0.0987197	0.0987197
2019	Baota District	73613	45	73613	6810	0.0925108	0.0925108
2020	Baota District		45	74900	6480	0.0865154	0.0865154
2021	Baota District		45	76187	6150	0.0807224	0.0807224
2012	Zichang City	77259	46	77259	7526	0.0974126	0.0974126
2013	Zichang City	75025	46	75025	7666	0.102179	0.102179
2014	Zichang City	77657	46	77657	8247	0.106198	0.106198
2015	Zichang City	31848	46	31848	8379	0.263093	0.263093
2016	Zichang City	75785	46	75785	8333	0.109956	0.109956
2017	Zichang City	78154	46	78154	3855	0.0493257	0.0493257
2018	Zichang City	42475	46	42475	3781	0.0890171	0.0890171
2019	Zichang City	43071	46	43071	3707	0.0860672	0.0860672
2020	Zichang City		46	43667	3633	0.0831978	0.0831978
2021	Zichang City		46	44263	3559	0.0804058	0.0804058
2012	Yanchuan County	43263	47	43263	4060	0.0938446	0.0938446
2013	Yanchuan County	40054	47	40054	4060	0.101363	0.101363
2014	Yanchuan County	43018	47	43018	4060	0.0943791	0.0943791
2015	Yanchuan County	26797	47	26797	4060	0.151509	0.151509
2016	Yanchuan County	31767	47	31767	4058	0.127743	0.127743
2017	Yanchuan County	31780	47	31780	4048	0.127376	0.127376
2018	Yanchuan County	28916	47	28916	3820	0.132107	0.132107
2019	Yanchuan County	30359	47	30359	5365	0.176719	0.176719
2020	Yanchuan County		47	31802	6910	0.217282	0.217282
2021	Yanchuan County		47	33245	8455	0.254324	0.254324
2012	Yanchang County	38374	48	38374	4688	0.122166	0.122166
2013	Yanchang County	35598	48	35598	4921	0.138238	0.138238
2014	Yanchang County	40077	48	40077	5166	0.128902	0.128902
2015	Yanchang County	27832	48	27832	5362	0.192656	0.192656
2016	Yanchang County	27047	48	27047	5495	0.203165	0.203165
2017	Yanchang County	30027	48	30027	5739	0.191128	0.191128
2018	Yanchang County	21603	48	21603	6025	0.278896	0.278896
2019	Yanchang County	23191	48	23191	6416	0.276659	0.276659
2020	Yanchang County		48	24779	6807	0.274708	0.274708
2021	Yanchang County		48	26367	7198	0.272993	0.272993
2012	Ansai District	68568	49	68568	4361	0.0636011	0.0636011
2013	Ansai District	65687	49	65687	4531	0.0689786	0.0689786
2014	Ansai District	71490	49	71490	4701	0.0657574	0.0657574
2015	Ansai District	69521	49	69521	4871	0.0700652	0.0700652
2016	Ansai District	68243	49	68243	5041	0.0738684	0.0738684
2017	Ansai District	68544	49	68544	5211	0.0760242	0.0760242
2018	Ansai District	53285	49	53285	5193	0.0974571	0.0974571
2019	Ansai District	53981	49	53981	5091	0.094311	0.094311
2020	Ansai District		49	54677	4989	0.0912449	0.0912449
2021	Ansai District		49	55373	4887	0.088256	0.088256
2012	Zhidan County	55146	50	55146	2655	0.0481449	0.0481449
2013	Zhidan County	51455	50	51455	2658	0.0516568	0.0516568
2014	Zhidan County	53180	50	53180	2658	0.0499812	0.0499812
2015	Zhidan County	54024	50	54024	2669	0.049404	0.049404
2016	Zhidan County	56488	50	56488	2812	0.0497805	0.0497805
2017	Zhidan County	56573	50	56573	2801	0.0495113	0.0495113
2018	Zhidan County	70612	50	70612	3159	0.0447374	0.0447374
2019	Zhidan County	71587	50	71587	4037	0.0563929	0.0563929
2020	Zhidan County		50	72562	4915	0.0677352	0.0677352
2021	Zhidan County		50	73537	5793	0.0787767	0.0787767
2012	Wuqi County	58662	51	58662	3631	0.061897	0.061897
2013	Wuqi County	56742	51	56742	3450	0.0608015	0.0608015
2014	Wuqi County	62146	51	62146	3314	0.053326	0.053326
2015	Wuqi County	61065	51	61065	3322	0.054401	0.054401
2016	Wuqi County	62318	51	62318	2824	0.045316	0.045316
2017	Wuqi County	69380	51	69380	2819	0.0406313	0.0406313
2018	Wuqi County	68931	51	68931	2807	0.0407219	0.0407219
2019	Wuqi County	70610	51	70610	3359	0.0475712	0.0475712
2020	Wuqi County		51	72289	3911	0.0541023	0.0541023
2021	Wuqi County		51	73968	4463	0.0603369	0.0603369
2012	Ganquan County	41577	52	41577	3492	0.0839887	0.0839887
2013	Ganquan County	39597	52	39597	3415	0.0862439	0.0862439
2014	Ganquan County	42427	52	42427	3333	0.0785585	0.0785585
2015	Ganquan County	43489	52	43489	3694	0.084941	0.084941
2016	Ganquan County	49973	52	49973	3721	0.0744602	0.0744602
2017	Ganquan County	47180	52	47180	3734	0.0791437	0.0791437
2018	Ganquan County	44627	52	44627	3756	0.0841643	0.0841643
2019	Ganquan County	45270	52	45270	3896	0.0860614	0.0860614
2020	Ganquan County		52	45913	4036	0.0879054	0.0879054
2021	Ganquan County		52	46556	4176	0.0896984	0.0896984
2012	Luochuan County	94413	53	94413	53527	0.566945	0.566945
2013	Luochuan County	94540	53	94540	56489	0.597514	0.597514
2014	Luochuan County	99282	53	99282	61468	0.619125	0.619125
2015	Luochuan County	99886	53	99886	58261	0.583275	0.583275
2016	Luochuan County	105975	53	105975	61298	0.578419	0.578419
2017	Luochuan County	105112	53	105112	59923	0.570087	0.570087
2018	Luochuan County	106124	53	106124	58353	0.549857	0.549857
2019	Luochuan County	106324	53	106324	52518	0.493943	0.493943
2020	Luochuan County		53	106524	46683	0.438239	0.438239
2021	Luochuan County		53	106724	40848	0.382744	0.382744
2012	Fu County	37304	54	37304	11138	0.298574	0.298574
2013	Fu County	35389	54	35389	11223	0.317132	0.317132
2014	Fu County	35010	54	35010	11897	0.339817	0.339817
2015	Fu County	36426	54	36426	11931	0.327541	0.327541
2016	Fu County	36426	54	36426	11812	0.324274	0.324274
2017	Fu County	36609	54	36609	11140	0.304297	0.304297
2018	Fu County	32950	54	32950	10899	0.330774	0.330774
2019	Fu County	33290	54	33290	11362	0.341304	0.341304
2020	Fu County		54	33630	11825	0.351621	0.351621
2021	Fu County		54	33970	12288	0.361731	0.361731
2012	Huangling County	46616	55	46616	9085	0.19489	0.19489
2013	Huangling County	45638	55	45638	10805	0.236754	0.236754
2014	Huangling County	47939	55	47939	11223	0.23411	0.23411
2015	Huangling County	50013	55	50013	11530	0.23054	0.23054
2016	Huangling County	49456	55	49456	11396	0.230427	0.230427
2017	Huangling County	45752	55	45752	11537	0.252164	0.252164
2018	Huangling County	53289	55	53289	11864	0.222635	0.222635
2019	Huangling County	53580	55	53580	12005	0.224057	0.224057
2020	Huangling County		55	53871	12146	0.225465	0.225465
2021	Huangling County		55	54162	10226	0.188804	0.188804
2012	Huanglong County	77375	56	77375	10059	0.130003	0.130003
2013	Huanglong County	82121	56	82121	10562	0.128615	0.128615
2014	Huanglong County	86149	56	86149	10716	0.124389	0.124389
2015	Huanglong County	95918	56	95918	10629	0.110813	0.110813
2016	Huanglong County	90572	56	90572	11222	0.123901	0.123901
2017	Huanglong County	69900	56	69900	10943	0.156552	0.156552
2018	Huanglong County	73192	56	73192	10861	0.148391	0.148391
2019	Huanglong County	73495	56	73495	10779	0.146663	0.146663
2020	Huanglong County		56	73798	10697	0.14495	0.14495
2021	Huanglong County		56	74101	9524	0.128527	0.128527
2012	Yichuan County	37083	57	37083	14991	0.404255	0.404255
2013	Yichuan County	36614	57	36614	17917	0.489348	0.489348
2014	Yichuan County	37235	57	37235	18618	0.500013	0.500013
2015	Yichuan County	36322	57	36322	18947	0.52164	0.52164
2016	Yichuan County	35047	57	35047	19208	0.548064	0.548064
2017	Yichuan County	35217	57	35217	18244	0.518045	0.518045
2018	Yichuan County	27251	57	27251	19372	0.710873	0.710873
2019	Yichuan County	27282	57	27282	20500	0.751411	0.751411
2020	Yichuan County		57	27313	21628	0.791857	0.791857
2021	Yichuan County		57	27344	12588	0.460357	0.460357
2012	Yijun County	97446	58	97446	12589	0.129189	0.129189
2013	Yijun County	99645	58	99645	12559	0.126037	0.126037
2014	Yijun County	97536	58	97536	12546	0.128629	0.128629
2015	Yijun County	100782	58	100782	12149	0.120547	0.120547
2016	Yijun County	104358	58	104358	12532	0.120087	0.120087
2017	Yijun County	106418	58	106418	12721	0.119538	0.119538
2018	Yijun County	159268	58	159268	11437	0.0718098	0.0718098
2019	Yijun County	162215	58	162215	10153	0.0625898	0.0625898
2020	Yijun County		58	165162	8869	0.0536988	0.0536988
2021	Yijun County		58	168109	29347	0.174571	0.174571
2012	Yaozhou District	84401	59	84401	30238	0.358266	0.358266
2013	Yaozhou District	83819	59	83819	30320	0.361732	0.361732
2014	Yaozhou District	90347	59	90347	32049	0.354732	0.354732
2015	Yaozhou District	87955	59	87955	31436	0.35741	0.35741
2016	Yaozhou District	89248	59	89248	33047	0.370283	0.370283
2017	Yaozhou District	89983	59	89983	32752	0.36398	0.36398
2018	Yaozhou District	79246	59	79246	27512	0.347172	0.347172
2019	Yaozhou District	73063	59	73063	22272	0.304833	0.304833
2020	Yaozhou District		59	66880	17032	0.254665	0.254665
2021	Yaozhou District		59	60697	1837	0.0302651	0.0302651
2012	Wangyi District	11256	60	11256	1836	0.163113	0.163113
2013	Wangyi District	10182	60	10182	1834	0.180122	0.180122
2014	Wangyi District	9967	60	9967	1605	0.161031	0.161031
2015	Wangyi District	10559	60	10559	1529	0.144805	0.144805
2016	Wangyi District	10235	60	10235	1526	0.149096	0.149096
2017	Wangyi District	10363	60	10363	1497	0.144456	0.144456
2018	Wangyi District	9477	60	9477	1472	0.155323	0.155323
2019	Wangyi District	8503	60	8503	1447	0.170175	0.170175
2020	Wangyi District		60	7529	1422	0.18887	0.18887
2021	Wangyi District		60	6555	8586	1.30984	1.30984
2012	Yintai District	38450	61	38450	6519	0.169545	0.169545
2013	Yintai District	37361	61	37361	7216	0.193143	0.193143
2014	Yintai District	36091	61	36091	8385	0.232329	0.232329
2015	Yintai District	35691	61	35691	7861	0.220252	0.220252
2016	Yintai District	36198	61	36198	8131	0.224626	0.224626
2017	Yintai District	36086	61	36086	7779	0.215568	0.215568
2018	Yintai District	39804	61	39804	8040	0.20199	0.20199
2019	Yintai District	38606	61	38606	8301	0.215018	0.215018
2020	Yintai District		61	37408	8562	0.228882	0.228882
2021	Yintai District		61	36210	47824	1.32074	1.32074
2012	Baishui County	117880	62	117880	51325	0.4354	0.4354
2013	Baishui County	110759	62	110759	53742	0.485216	0.485216
2014	Baishui County	105208	62	105208	58166	0.552867	0.552867
2015	Baishui County	111623	62	111623	61610	0.551947	0.551947
2016	Baishui County	109070	62	109070	64105	0.587742	0.587742
2017	Baishui County	109004	62	109004	68699	0.630243	0.630243
2018	Baishui County	102598	62	102598	70849	0.69055	0.69055
2019	Baishui County	102180	62	102180	69779	0.682903	0.682903
2020	Baishui County		62	101762	68709	0.675193	0.675193
2021	Baishui County		62	101344	31851	0.314286	0.314286
2012	Chengcheng County	177655	63	177655	33001	0.185759	0.185759
2013	Chengcheng County	175100	63	175100	33529	0.191485	0.191485
2014	Chengcheng County	167304	63	167304	35445	0.21186	0.21186
2015	Chengcheng County	178561	63	178561	35307	0.197731	0.197731
2016	Chengcheng County	175553	63	175553	35731	0.203534	0.203534
2017	Chengcheng County	172478	63	172478	24863	0.144152	0.144152
2018	Chengcheng County	181348	63	181348	23749	0.130958	0.130958
2019	Chengcheng County	168719	63	168719	23705	0.1405	0.1405
2020	Chengcheng County		63	156090	23661	0.151586	0.151586
2021	Chengcheng County		63	143461	17474	0.121803	0.121803
2012	Hancheng City	83268	64	83268	17547	0.210729	0.210729
2013	Hancheng City	77600	64	77600	17612	0.226959	0.226959
2014	Hancheng City	72790	64	72790	17642	0.242368	0.242368
2015	Hancheng City	72576	64	72576	18124	0.249724	0.249724
2016	Hancheng City	68721	64	68721	18068	0.262918	0.262918
2017	Hancheng City	65086	64	65086	18488	0.284055	0.284055
2018	Hancheng City	48539	64	48539	18010	0.371042	0.371042
2019	Hancheng City	49250	64	49250	18014	0.365766	0.365766
2020	Hancheng City		64	49961	18018	0.360641	0.360641
2021	Hancheng City		64	50672	33448	0.660088	0.660088
2012	Heyang County	220180	65	220180	26725	0.121378	0.121378
2013	Heyang County	207000	65	207000	25148	0.121488	0.121488
2014	Heyang County	197372	65	197372	24909	0.126203	0.126203
2015	Heyang County	206254	65	206254	24797	0.120226	0.120226
2016	Heyang County	203091	65	203091	24764	0.121935	0.121935
2017	Heyang County	204038	65	204038	24695	0.121031	0.121031
2018	Heyang County	219724	65	219724	24663	0.112245	0.112245
2019	Heyang County	229790	65	229790	24551	0.106841	0.106841
2020	Heyang County		65	239856	24464	0.101995	0.101995
2021	Heyang County		65	249922	24377	0.0975384	0.0975384
2012	Xunyi County	126735	66	126735	28267	0.22304	0.22304
2013	Xunyi County	118923	66	118923	33440	0.28119	0.28119
2014	Xunyi County	108028	66	108028	33720	0.312141	0.312141
2015	Xunyi County	112523	66	112523	32085	0.285142	0.285142
2016	Xunyi County	110004	66	110004	30430	0.276626	0.276626
2017	Xunyi County	105721	66	105721	30012	0.283879	0.283879
2018	Xunyi County	105319	66	105319	28775	0.273218	0.273218
2019	Xunyi County	123992	66	123992	27538	0.222095	0.222095
2020	Xunyi County		66	142665	26301	0.184355	0.184355
2021	Xunyi County		66	161338	32460	0.201193	0.201193
2012	Changwu County	62665	67	62665	34186	0.545536	0.545536
2013	Changwu County	58921	67	58921	31389	0.53273	0.53273
2014	Changwu County	55175	67	55175	32570	0.590304	0.590304
2015	Changwu County	58666	67	58666	33266	0.567041	0.567041
2016	Changwu County	54793	67	54793	33494	0.611282	0.611282
2017	Changwu County	56266	67	56266	34064	0.60541	0.60541
2018	Changwu County	55669	67	55669	33707	0.60549	0.60549
2019	Changwu County	54281	67	54281	33350	0.614395	0.614395
2020	Changwu County		67	52893	32993	0.623769	0.623769
2021	Changwu County		67	51505	24220	0.470246	0.470246
2012	Yongshou County	84735	68	84735	29727	0.350823	0.350823
2013	Yongshou County	82000	68	82000	30806	0.375683	0.375683
2014	Yongshou County	81018	68	81018	30651	0.378323	0.378323
2015	Yongshou County	89068	68	89068	30646	0.344074	0.344074
2016	Yongshou County	87605	68	87605	30638	0.349729	0.349729
2017	Yongshou County	86696	68	86696	30293	0.349416	0.349416
2018	Yongshou County	84687	68	84687	30334	0.35819	0.35819
2019	Yongshou County	80642	68	80642	30375	0.376665	0.376665
2020	Yongshou County		68	76597	30416	0.397091	0.397091
2021	Yongshou County		68	72552	28474	0.392463	0.392463
2012	Binzhou City	129983	69	129983	22427	0.172538	0.172538
2013	Binzhou City	118286	69	118286	20626	0.174374	0.174374
2014	Binzhou City	115331	69	115331	21516	0.186559	0.186559
2015	Binzhou City	125622	69	125622	21564	0.171658	0.171658
2016	Binzhou City	123049	69	123049	20010	0.162618	0.162618
2017	Binzhou City	121458	69	121458	19286	0.158787	0.158787
2018	Binzhou City	116741	69	116741	19372	0.16594	0.16594
2019	Binzhou City	111782	69	111782	19458	0.174071	0.174071
2020	Binzhou City		69	106823	19544	0.182957	0.182957
2021	Binzhou City		69	101864	32721	0.321222	0.321222
2012	Chunhua County	124294	70	124294	28316	0.227815	0.227815
2013	Chunhua County	115544	70	115544	30758	0.266202	0.266202
2014	Chunhua County	110000	70	110000	30680	0.278909	0.278909
2015	Chunhua County	118043	70	118043	28780	0.243809	0.243809
2016	Chunhua County	115709	70	115709	24862	0.214867	0.214867
2017	Chunhua County	113476	70	113476	22511	0.198377	0.198377
2018	Chunhua County	112614	70	112614	21422	0.190225	0.190225
2019	Chunhua County	108929	70	108929	20333	0.186663	0.186663
2020	Chunhua County		70	105244	19244	0.182851	0.182851
2021	Chunhua County		70	101559	23197	0.228409	0.228409
2012	Linyou County	63284	71	63284	23604	0.372985	0.372985
2013	Linyou County	60236	71	60236	14824	0.246099	0.246099
2014	Linyou County	66326	71	66326	15242	0.229804	0.229804
2015	Linyou County	72780	71	72780	14782	0.203105	0.203105
2016	Linyou County	78558	71	78558	14785	0.188205	0.188205
2017	Linyou County	73787	71	73787	14800	0.200577	0.200577
2018	Linyou County	73523	71	73523	14771	0.200903	0.200903
2019	Linyou County	74384	71	74384	14742	0.198188	0.198188
2020	Linyou County		71	75245	14713	0.195535	0.195535
2021	Linyou County		71	76106	5144	0.0675899	0.0675899
2012	Feng County	28714	72	28714	5027	0.175071	0.175071
2013	Feng County	22025	72	22025	5130	0.232917	0.232917
2014	Feng County	22389	72	22389	5145	0.2298	0.2298
2015	Feng County	23637	72	23637	5426	0.229555	0.229555
2016	Feng County	23282	72	23282	5438	0.233571	0.233571
2017	Feng County	23000	72	23000	5283	0.229696	0.229696
2018	Feng County	23828	72	23828	6344	0.266241	0.266241
2019	Feng County	23924	72	23924	7405	0.309522	0.309522
2020	Feng County		72	24020	8466	0.352456	0.352456
2021	Feng County		72	24116	4522	0.18751	0.18751
2012	Taibai County	7331	73	7331	4290	0.585186	0.585186
2013	Taibai County	6370	73	6370	4384	0.688226	0.688226
2014	Taibai County	6405	73	6405	4200	0.655738	0.655738
2015	Taibai County	7592	73	7592	4206	0.554004	0.554004
2016	Taibai County	7380	73	7380	4322	0.585637	0.585637
2017	Taibai County	7059	73	7059	4226	0.598668	0.598668
2018	Taibai County	6721	73	6721	4210	0.626395	0.626395
2019	Taibai County	6756	73	6756	4194	0.620782	0.620782
2020	Taibai County		73	6791	4178	0.615226	0.615226
2021	Taibai County		73	6826	3480	0.509815	0.509815
2012	Lueyang County	46939	74	46939	3664	0.0780588	0.0780588
2013	Lueyang County	47532	74	47532	3642	0.0766221	0.0766221
2014	Lueyang County	47119	74	47119	3670	0.0778879	0.0778879
2015	Lueyang County	48168	74	48168	3608	0.0749045	0.0749045
2016	Lueyang County	48421	74	48421	3577	0.0738729	0.0738729
2017	Lueyang County	49104	74	49104	3394	0.0691186	0.0691186
2018	Lueyang County	43783	74	43783	2500	0.0570998	0.0570998
2019	Lueyang County	44624	74	44624	1606	0.0359896	0.0359896
2020	Lueyang County		74	45465	712	0.0156604	0.0156604
2021	Lueyang County		74	46306	11787	0.254546	0.254546
2012	Ningqiang County	82208	75	82208	11907	0.14484	0.14484
2013	Ningqiang County	83255	75	83255	11890	0.142814	0.142814
2014	Ningqiang County	82549	75	82549	11882	0.143939	0.143939
2015	Ningqiang County	85233	75	85233	10162	0.119226	0.119226
2016	Ningqiang County	85656	75	85656	10206	0.119151	0.119151
2017	Ningqiang County	87409	75	87409	10243	0.117185	0.117185
2018	Ningqiang County	76834	75	76834	10354	0.134758	0.134758
2019	Ningqiang County	78177	75	78177	10465	0.133863	0.133863
2020	Ningqiang County		75	79520	10576	0.132998	0.132998
2021	Ningqiang County		75	80863	536	0.0066285	0.0066285
2012	Foping County	8550	76	8550	521	0.0609357	0.0609357
2013	Foping County	8658	76	8658	561	0.0647956	0.0647956
2014	Foping County	8581	76	8581	615	0.07167	0.07167
2015	Foping County	9063	76	9063	603	0.0665343	0.0665343
2016	Foping County	9099	76	9099	609	0.0669304	0.0669304
2017	Foping County	9264	76	9264	604	0.0651986	0.0651986
2018	Foping County	9055	76	9055	620	0.0684705	0.0684705
2019	Foping County	9186	76	9186	636	0.0692358	0.0692358
2020	Foping County		76	9317	652	0.0699796	0.0699796
2021	Foping County		76	9448	829	0.0877434	0.0877434
2012	Liuba County	11748	77	11748	829	0.0705652	0.0705652
2013	Liuba County	11897	77	11897	829	0.0696814	0.0696814
2014	Liuba County	11691	77	11691	827	0.0707382	0.0707382
2015	Liuba County	12072	77	12072	804	0.0666004	0.0666004
2016	Liuba County	12113	77	12113	804	0.066375	0.066375
2017	Liuba County	12323	77	12323	474	0.0384647	0.0384647
2018	Liuba County	9726	77	9726	463	0.0476044	0.0476044
2019	Liuba County	9869	77	9869	452	0.0458	0.0458
2020	Liuba County		77	10012	441	0.0440471	0.0440471
2021	Liuba County		77	10155	14175	1.39586	1.39586
2012	Xixiang County	98264	78	98264	14680	0.149393	0.149393
2013	Xixiang County	99524	78	99524	13607	0.136721	0.136721
2014	Xixiang County	98670	78	98670	13762	0.139475	0.139475
2015	Xixiang County	102531	78	102531	13672	0.133345	0.133345
2016	Xixiang County	102853	78	102853	12926	0.125675	0.125675
2017	Xixiang County	104724	78	104724	13037	0.124489	0.124489
2018	Xixiang County	96384	78	96384	11019	0.114324	0.114324
2019	Xixiang County	97521	78	97521	9001	0.0922981	0.0922981
2020	Xixiang County		78	98658	6983	0.0707799	0.0707799
2021	Xixiang County		78	99795	7339	0.0735408	0.0735408
2012	Zhenba County	86517	79	86517	7701	0.0890114	0.0890114
2013	Zhenba County	87623	79	87623	7150	0.0815996	0.0815996
2014	Zhenba County	86865	79	86865	6236	0.0717896	0.0717896
2015	Zhenba County	89515	79	89515	5331	0.0595543	0.0595543
2016	Zhenba County	89981	79	89981	5930	0.0659028	0.0659028
2017	Zhenba County	91886	79	91886	5997	0.0652657	0.0652657
2018	Zhenba County	93384	79	93384	4704	0.0503727	0.0503727
2019	Zhenba County	95217	79	95217	3411	0.0358234	0.0358234
2020	Zhenba County		79	97050	2118	0.0218238	0.0218238
2021	Zhenba County		79	98883	6630	0.0670489	0.0670489
2012	Hantai District	103517	80	103517	6694	0.0646657	0.0646657
2013	Hantai District	104845	80	104845	8948	0.085345	0.085345
2014	Hantai District	103886	80	103886	8878	0.0854591	0.0854591
2015	Hantai District	107582	80	107582	12757	0.118579	0.118579
2016	Hantai District	107944	80	107944	12356	0.114467	0.114467
2017	Hantai District	110074	80	110074	11775	0.106973	0.106973
2018	Hantai District	113270	80	113270	12053	0.106409	0.106409
2019	Hantai District	114009	80	114009	12331	0.108158	0.108158
2020	Hantai District		80	114748	12609	0.109884	0.109884
2021	Hantai District		80	115487	20464	0.177197	0.177197
2012	Mian County	132994	81	132994	20595	0.154857	0.154857
2013	Mian County	134696	81	134696	21516	0.159737	0.159737
2014	Mian County	133513	81	133513	22150	0.165901	0.165901
2015	Mian County	131171	81	131171	22377	0.170594	0.170594
2016	Mian County	132523	81	132523	22514	0.169887	0.169887
2017	Mian County	131460	81	131460	21792	0.165769	0.165769
2018	Mian County	136618	81	136618	21719	0.158976	0.158976
2019	Mian County	136520	81	136520	21646	0.158556	0.158556
2020	Mian County		81	136422	21573	0.158134	0.158134
2021	Mian County		81	136324	22951	0.168356	0.168356
2012	Nanzheng District	147416	82	147416	21659	0.146924	0.146924
2013	Nanzheng District	149315	82	149315	20367	0.136403	0.136403
2014	Nanzheng District	148007	82	148007	19075	0.128879	0.128879
2015	Nanzheng District	148153	82	148153	17783	0.120031	0.120031
2016	Nanzheng District	148790	82	148790	16491	0.110834	0.110834
2017	Nanzheng District	147828	82	147828	15199	0.102815	0.102815
2018	Nanzheng District	156499	82	156499	15077	0.0963393	0.0963393
2019	Nanzheng District	155634	82	155634	14955	0.0960908	0.0960908
2020	Nanzheng District		82	154769	14833	0.0958396	0.0958396
2021	Nanzheng District		82	153904	34124	0.221723	0.221723
2012	Chenggu County	139827	83	139827	34435	0.246269	0.246269
2013	Chenggu County	141604	83	141604	37016	0.261405	0.261405
2014	Chenggu County	140327	83	140327	37417	0.266641	0.266641
2015	Chenggu County	141017	83	141017	35241	0.249906	0.249906
2016	Chenggu County	141359	83	141359	34018	0.24065	0.24065
2017	Chenggu County	141453	83	141453	34778	0.245863	0.245863
2018	Chenggu County	155291	83	155291	34465	0.221938	0.221938
2019	Chenggu County	154772	83	154772	34152	0.22066	0.22066
2020	Chenggu County		83	154253	33839	0.219373	0.219373
2021	Chenggu County		83	153734	19694	0.128104	0.128104
2012	Yang County	155658	84	155658	21910	0.140757	0.140757
2013	Yang County	157626	84	157626	23897	0.151606	0.151606
2014	Yang County	156204	84	156204	23273	0.148991	0.148991
2015	Yang County	157065	84	157065	17296	0.11012	0.11012
2016	Yang County	157753	84	157753	17180	0.108904	0.108904
2017	Yang County	157255	84	157255	18822	0.119691	0.119691
2018	Yang County	165333	84	165333	19487	0.117865	0.117865
2019	Yang County	165044	84	165044	19800	0.119968	0.119968
2020	Yang County		84	164755	20113	0.122078	0.122078
2021	Yang County		84	164466	49910	0.303467	0.303467
2012	Hanbin District	217363	85	217363	49275	0.226695	0.226695
2013	Hanbin District	218628	85	218628	48469	0.221696	0.221696
2014	Hanbin District	214162	85	214162	50444	0.235541	0.235541
2015	Hanbin District	214262	85	214262	50841	0.237284	0.237284
2016	Hanbin District	215201	85	215201	52155	0.242355	0.242355
2017	Hanbin District	212784	85	212784	51051	0.239919	0.239919
2018	Hanbin District	186700	85	186700	48270	0.258543	0.258543
2019	Hanbin District	189685	85	189685	45489	0.239813	0.239813
2020	Hanbin District		85	192670	11116	0.0576945	0.0576945
2021	Hanbin District		85	195655	5064	0.0258823	0.0258823
2012	Langao County	64013	86	64013	4677	0.0730633	0.0730633
2013	Langao County	65142	86	65142	4654	0.0714439	0.0714439
2014	Langao County	65530	86	65530	4809	0.0733862	0.0733862
2015	Langao County	67290	86	67290	4629	0.0687918	0.0687918
2016	Langao County	67905	86	67905	4415	0.0650173	0.0650173
2017	Langao County	68582	86	68582	4365	0.0636464	0.0636464
2018	Langao County	41497	86	41497	4157	0.100176	0.100176
2019	Langao County	42326	86	42326	3949	0.0932996	0.0932996
2020	Langao County		86	43155	4626	0.107195	0.107195
2021	Langao County		86	43984	11086	0.252046	0.252046
2012	Hanyin County	100027	87	100027	11056	0.11053	0.11053
2013	Hanyin County	102453	87	102453	10967	0.107044	0.107044
2014	Hanyin County	103270	87	103270	11070	0.107195	0.107195
2015	Hanyin County	101208	87	101208	10868	0.107383	0.107383
2016	Hanyin County	101646	87	101646	10729	0.105553	0.105553
2017	Hanyin County	100412	87	100412	10730	0.10686	0.10686
2018	Hanyin County	96263	87	96263	10216	0.106126	0.106126
2019	Hanyin County	98247	87	98247	9702	0.0987511	0.0987511
2020	Hanyin County		87	100231	5222	0.0520996	0.0520996
2021	Hanyin County		87	102215	5514	0.0539451	0.0539451
2012	Shiquan County	66459	88	66459	5806	0.0873621	0.0873621
2013	Shiquan County	67048	88	67048	5538	0.0825975	0.0825975
2014	Shiquan County	66859	88	66859	5466	0.0817541	0.0817541
2015	Shiquan County	69911	88	69911	5202	0.0744089	0.0744089
2016	Shiquan County	70668	88	70668	4835	0.0684185	0.0684185
2017	Shiquan County	71180	88	71180	4771	0.0670273	0.0670273
2018	Shiquan County	61196	88	61196	4613	0.0753807	0.0753807
2019	Shiquan County	62565	88	62565	4455	0.0712059	0.0712059
2020	Shiquan County		88	63934	437	0.00683517	0.00683517
2021	Shiquan County		88	65303	393	0.0060181	0.0060181
2012	Ningshan County	19848	89	19848	349	0.0175836	0.0175836
2013	Ningshan County	19935	89	19935	348	0.0174567	0.0174567
2014	Ningshan County	19212	89	19212	345	0.0179575	0.0179575
2015	Ningshan County	19423	89	19423	345	0.0177624	0.0177624
2016	Ningshan County	19611	89	19611	344	0.0175412	0.0175412
2017	Ningshan County	19667	89	19667	340	0.0172878	0.0172878
2018	Ningshan County	12127	89	12127	334	0.0275418	0.0275418
2019	Ningshan County	12394	89	12394	339	0.0273519	0.0273519
2020	Ningshan County		89	12661	5204	0.411026	0.411026
2021	Ningshan County		89	12928	5204	0.402537	0.402537
2012	Ziyang County	106868	90	106868	5204	0.0486956	0.0486956
2013	Ziyang County	108375	90	108375	5153	0.0475479	0.0475479
2014	Ziyang County	109089	90	109089	5126	0.0469892	0.0469892
2015	Ziyang County	111311	90	111311	4919	0.0441915	0.0441915
2016	Ziyang County	111499	90	111499	4726	0.042386	0.042386
2017	Ziyang County	112260	90	112260	5100	0.0454303	0.0454303
2018	Ziyang County	102996	90	102996	3748	0.0363898	0.0363898
2019	Ziyang County	105073	90	105073	2396	0.0228032	0.0228032
2020	Ziyang County		90	107150	5451	0.0508726	0.0508726
2021	Ziyang County		90	109227	23823	0.218105	0.218105
2012	Xunyang City	120091	91	120091	23736	0.19765	0.19765
2013	Xunyang City	122649	91	122649	24555	0.200205	0.200205
2014	Xunyang City	123708	91	123708	23448	0.189543	0.189543
2015	Xunyang City	125482	91	125482	23326	0.185891	0.185891
2016	Xunyang City	126092	91	126092	22859	0.181288	0.181288
2017	Xunyang City	126397	91	126397	22732	0.179846	0.179846
2018	Xunyang City	115459	91	115459	22724	0.196814	0.196814
2019	Xunyang City	117778	91	117778	22716	0.192871	0.192871
2020	Xunyang City		91	120097	7947	0.0661715	0.0661715
2021	Xunyang City		91	122416	4649	0.0379771	0.0379771
2012	Pingli County	73628	92	73628	4672	0.0634541	0.0634541
2013	Pingli County	74041	92	74041	4789	0.0646804	0.0646804
2014	Pingli County	74132	92	74132	4783	0.06452	0.06452
2015	Pingli County	76898	92	76898	4518	0.0587532	0.0587532
2016	Pingli County	77631	92	77631	4387	0.0565109	0.0565109
2017	Pingli County	78199	92	78199	4377	0.0559726	0.0559726
2018	Pingli County	56507	92	56507	4089	0.0723627	0.0723627
2019	Pingli County	57606	92	57606	3936	0.0683262	0.0683262
2020	Pingli County		92	58705	1133	0.0192999	0.0192999
2021	Pingli County		92	59804	1277	0.0213531	0.0213531
2012	Zhenping County	27180	93	27180	1421	0.0522811	0.0522811
2013	Zhenping County	27363	93	27363	1398	0.0510909	0.0510909
2014	Zhenping County	27056	93	27056	1399	0.0517076	0.0517076
2015	Zhenping County	27534	93	27534	1383	0.0502288	0.0502288
2016	Zhenping County	27871	93	27871	1352	0.0485092	0.0485092
2017	Zhenping County	27949	93	27949	1328	0.0475151	0.0475151
2018	Zhenping County	21076	93	21076	1317	0.0624881	0.0624881
2019	Zhenping County	21524	93	21524	1306	0.0606765	0.0606765
2020	Zhenping County		93	21972	23910	1.0882	1.0882
2021	Zhenping County		93	22420	6973	0.311017	0.311017
2012	Baihe County	56326	94	56326	5999	0.106505	0.106505
2013	Baihe County	56706	94	56706	5873	0.103569	0.103569
2014	Baihe County	57364	94	57364	5817	0.101405	0.101405
2015	Baihe County	58180	94	58180	6106	0.10495	0.10495
2016	Baihe County	58376	94	58376	5865	0.100469	0.100469
2017	Baihe County	58900	94	58900	5644	0.0958234	0.0958234
2018	Baihe County	56726	94	56726	5538	0.0976272	0.0976272
2019	Baihe County	57249	94	57249	5432	0.0948838	0.0948838
2020	Baihe County		94	57772	15855	0.274441	0.274441
2021	Baihe County		94	58295	11427	0.19602	0.19602
2012	Shangzhou District	107590	95	107590	6999	0.0650525	0.0650525
2013	Shangzhou District	108103	95	108103	6582	0.0608864	0.0608864
2014	Shangzhou District	81183	95	81183	6055	0.0745846	0.0745846
2015	Shangzhou District	104620	95	104620	9776	0.0934429	0.0934429
2016	Shangzhou District	105291	95	105291	8660	0.0822482	0.0822482
2017	Shangzhou District	97768	95	97768	7731	0.079075	0.079075
2018	Shangzhou District	90416	95	90416	6902	0.076336	0.076336
2019	Shangzhou District	91387	95	91387	6073	0.0664537	0.0664537
2020	Shangzhou District		95	92358	16317	0.176671	0.176671
2021	Shangzhou District		95	93329	17234	0.184659	0.184659
2012	Luonan County	163415	96	163415	18151	0.111073	0.111073
2013	Luonan County	168079	96	168079	18407	0.109514	0.109514
2014	Luonan County	142081	96	142081	17832	0.125506	0.125506
2015	Luonan County	162334	96	162334	17683	0.10893	0.10893
2016	Luonan County	164437	96	164437	16908	0.102824	0.102824
2017	Luonan County	159840	96	159840	16790	0.105043	0.105043
2018	Luonan County	123812	96	123812	14400	0.116305	0.116305
2019	Luonan County	120869	96	120869	12010	0.0993638	0.0993638
2020	Luonan County		96	117926	5689	0.0482421	0.0482421
2021	Luonan County		96	114983	8830	0.076794	0.076794
2012	Shanyang County	110726	97	110726	8801	0.0794845	0.0794845
2013	Shanyang County	111477	97	111477	8853	0.0794155	0.0794155
2014	Shanyang County	86812	97	86812	8864	0.102106	0.102106
2015	Shanyang County	101365	97	101365	8817	0.0869827	0.0869827
2016	Shanyang County	102559	97	102559	8965	0.0874131	0.0874131
2017	Shanyang County	107437	97	107437	8538	0.0794698	0.0794698
2018	Shanyang County	85740	97	85740	8218	0.0958479	0.0958479
2019	Shanyang County	85264	97	85264	8066	0.0946003	0.0946003
2020	Shanyang County		97	84788	8299	0.0978794	0.0978794
2021	Shanyang County		97	84312	5709	0.0677128	0.0677128
2012	Danfeng County	65152	98	65152	5729	0.0879328	0.0879328
2013	Danfeng County	65304	98	65304	5542	0.0848646	0.0848646
2014	Danfeng County	51142	98	51142	5374	0.10508	0.10508
2015	Danfeng County	60140	98	60140	5307	0.0882441	0.0882441
2016	Danfeng County	61124	98	61124	5219	0.0853838	0.0853838
2017	Danfeng County	60907	98	60907	5166	0.0848178	0.0848178
2018	Danfeng County	54374	98	54374	5220	0.0960018	0.0960018
2019	Danfeng County	52979	98	52979	5274	0.0995489	0.0995489
2020	Danfeng County		98	51584	5249	0.101756	0.101756
2021	Danfeng County		98	50189	5307	0.10574	0.10574
2012	Shangnan County	61733	99	61733	5365	0.0869065	0.0869065
2013	Shangnan County	62560	99	62560	5294	0.0846228	0.0846228
2014	Shangnan County	49332	99	49332	5070	0.102773	0.102773
2015	Shangnan County	56538	99	56538	5038	0.0891082	0.0891082
2016	Shangnan County	57209	99	57209	4952	0.0865598	0.0865598
2017	Shangnan County	58938	99	58938	4855	0.0823747	0.0823747
2018	Shangnan County	29095	99	29095	4492	0.154391	0.154391
2019	Shangnan County	30882	99	30882	4129	0.133702	0.133702
2020	Shangnan County		99	32669	8859	0.271175	0.271175
2021	Shangnan County		99	34456	8477	0.246024	0.246024
2012	Zhen’an County	92502	100	92502	8655	0.0935655	0.0935655
2013	Zhen’an County	92941	100	92941	8638	0.0929407	0.0929407
2014	Zhen’an County	75641	100	75641	8127	0.107442	0.107442
2015	Zhen’an County	86613	100	86613	8240	0.0951358	0.0951358
2016	Zhen’an County	87690	100	87690	8122	0.0926217	0.0926217
2017	Zhen’an County	89283	100	89283	8185	0.0916748	0.0916748
2018	Zhen’an County	73279	100	73279	7981	0.108913	0.108913
2019	Zhen’an County	70928	100	70928	8103	0.114243	0.114243
2020	Zhen’an County		100	68577	5084	0.0741356	0.0741356
2021	Zhen’an County		100	66226	5183	0.0782623	0.0782623
2012	Zhashui County	41842	101	41842	5282	0.126237	0.126237
2013	Zhashui County	42253	101	42253	4904	0.116063	0.116063
2014	Zhashui County	35792	101	35792	4712	0.13165	0.13165
2015	Zhashui County	40946	101	40946	4694	0.114639	0.114639
2016	Zhashui County	41450	101	41450	4504	0.108661	0.108661
2017	Zhashui County	42561	101	42561	4510	0.105966	0.105966
2018	Zhashui County	43843	101	43843	4430	0.101042	0.101042
2019	Zhashui County	39228	101	39228	4350	0.11089	0.11089
2020	Zhashui County		101	34613	4368	0.126195	0.126195
2021	Zhashui County		101	29998	4366	0.145543	0.145543

## Sheet: Share of total output value of 
year	xian	C13（Gross output value of agriculture, forestry, animal husbandry and fishery）	b41(Gross Regional Product)	Share of total output value of agriculture, forestry, animal husbandry and fishery	Share of total output value of agriculture, forestry, animal husbandry and fishery
2012	Baqiao District	245553	2333000	0.105252	0.105252
2013	Baqiao District	279503	2690300	0.103893	0.103893
2014	Baqiao District	300728	2933000	0.102533	0.102533
2015	Baqiao District	307940	3322800	0.0926749	0.0926749
2016	Baqiao District	327061	3297800	0.0991755	0.0991755
2017	Baqiao District	364717	4283500	0.0851446	0.0851446
2018	Baqiao District	311278	4807800	0.0647444	0.0647444
2019	Baqiao District	327267	4891900	0.0668998	0.0668998
2020	Baqiao District	342532	5420600	0.0631908	0.0631908
2021	Baqiao District	357797	6068500	0.0589597	0.0589597
2012	Yanliang District	290460	1414900	0.205287	0.205287
2013	Yanliang District	324413	1689600	0.192006	0.192006
2014	Yanliang District	354330	1947200	0.181969	0.181969
2015	Yanliang District	368854	1918500	0.192262	0.192262
2016	Yanliang District	381618	1939400	0.196771	0.196771
2017	Yanliang District	412635	2402100	0.171781	0.171781
2018	Yanliang District	446310	2501000	0.178453	0.178453
2019	Yanliang District	487524	2550600	0.191141	0.191141
2020	Yanliang District	528738	2491000	0.212259	0.212259
2021	Yanliang District	569952	2648400	0.215206	0.215206
2012	Lintong District	468170	2115300	0.221326	0.221326
2013	Lintong District	515993	2265800	0.227731	0.227731
2014	Lintong District	538221	2314500	0.232543	0.232543
2015	Lintong District	551556	1923400	0.286761	0.286761
2016	Lintong District	569391	1831100	0.310956	0.310956
2017	Lintong District	588206	2210100	0.266145	0.266145
2018	Lintong District	601608	2375200	0.253287	0.253287
2019	Lintong District	666124	2426900	0.274475	0.274475
2020	Lintong District	730640	2525300	0.289328	0.289328
2021	Lintong District	795156	2623700	0.303067	0.303067
2012	Chang’an District	31	3626400	8.54842e-06	8.54842e-06
2013	Chang’an District	31	3691460	8.39776e-06	8.39776e-06
2014	Chang’an District	40	4206958	9.50806e-06	9.50806e-06
2015	Chang’an District	41.5	5126913	8.09454e-06	8.09454e-06
2016	Chang’an District	43	6080200	7.07214e-06	7.07214e-06
2017	Chang’an District	39	7910300	4.93028e-06	4.93028e-06
2018	Chang’an District	24	9091100	2.63994e-06	2.63994e-06
2019	Chang’an District	27	10012100	2.69674e-06	2.69674e-06
2020	Chang’an District	197	11362500	1.73377e-05	1.73377e-05
2021	Chang’an District	367	12694500	2.89102e-05	2.89102e-05
2012	Lantian County	401514	957300	0.419423	0.419423
2013	Lantian County	436071	1068900	0.407962	0.407962
2014	Lantian County	462420	1184500	0.390393	0.390393
2015	Lantian County	465601	1130800	0.411745	0.411745
2016	Lantian County	492519	1224400	0.402253	0.402253
2017	Lantian County	539025	1434900	0.375653	0.375653
2018	Lantian County	494077	1578300	0.313044	0.313044
2019	Lantian County	517089	1492300	0.346505	0.346505
2020	Lantian County	540101	1429600	0.377799	0.377799
2021	Lantian County	563113	1517000	0.371202	0.371202
2012	Zhouzhi County	412820	782800	0.527363	0.527363
2013	Zhouzhi County	460093	876600	0.524861	0.524861
2014	Zhouzhi County	482477	972000	0.496376	0.496376
2015	Zhouzhi County	508904	1040600	0.489049	0.489049
2016	Zhouzhi County	572627	1149900	0.49798	0.49798
2017	Zhouzhi County	591455	1342600	0.44053	0.44053
2018	Zhouzhi County	589596	1462700	0.403087	0.403087
2019	Zhouzhi County	646428	1371500	0.471329	0.471329
2020	Zhouzhi County	703260	1394400	0.504346	0.504346
2021	Zhouzhi County	760092	1463900	0.519224	0.519224
2012	Gaoling District	334939	2281600	0.1468	0.1468
2013	Gaoling District	399495	2799400	0.142707	0.142707
2014	Gaoling District	468141	3000900	0.156	0.156
2015	Gaoling District	495452	2914000	0.170025	0.170025
2016	Gaoling District	555928	3002400	0.185161	0.185161
2017	Gaoling District	607588	3771000	0.161121	0.161121
2018	Gaoling District	482906	3784500	0.127601	0.127601
2019	Gaoling District	528930	3744400	0.141259	0.141259
2020	Gaoling District	574954	3744900	0.15353	0.15353
2021	Gaoling District	620978	3847200	0.16141	0.16141
2012	Huyi District	407108	1421300	0.286434	0.286434
2013	Huyi District	447149	1552400	0.288037	0.288037
2014	Huyi District	481686	1619600	0.29741	0.29741
2015	Huyi District	496155	1508400	0.328928	0.328928
2016	Huyi District	515503	1628200	0.316609	0.316609
2017	Huyi District	496405	1974100	0.251459	0.251459
2018	Huyi District	447692	2172600	0.206063	0.206063
2019	Huyi District	484760	1802300	0.268967	0.268967
2020	Huyi District	521828	2336100	0.223376	0.223376
2021	Huyi District	558896	2660500	0.210072	0.210072
2012	Chencang District	369445	1515400	0.243794	0.243794
2013	Chencang District	403722	1629100	0.247819	0.247819
2014	Chencang District	419956	1736400	0.241854	0.241854
2015	Chencang District	431498	1477200	0.292105	0.292105
2016	Chencang District	449627	1647800	0.272865	0.272865
2017	Chencang District	456435	1913800	0.238497	0.238497
2018	Chencang District	400193	2128441	0.188022	0.188022
2019	Chencang District	449269	2144061	0.209541	0.209541
2020	Chencang District	498345	2205587	0.225947	0.225947
2021	Chencang District	547421	2413681	0.226799	0.226799
2012	Mei County	290770	771900	0.376694	0.376694
2013	Mei County	331773	905700	0.366317	0.366317
2014	Mei County	363300	1046300	0.347224	0.347224
2015	Mei County	375668	1069100	0.351387	0.351387
2016	Mei County	386713	1155100	0.334787	0.334787
2017	Mei County	390844	1289200	0.303168	0.303168
2018	Mei County	382767	1369809	0.279431	0.279431
2019	Mei County	415091	1612147	0.257477	0.257477
2020	Mei County	447415	1770147	0.252756	0.252756
2021	Mei County	479739	1997975	0.240113	0.240113
2012	Fufeng County	299723	818500	0.366186	0.366186
2013	Fufeng County	329922	951300	0.346812	0.346812
2014	Fufeng County	350702	1005700	0.348714	0.348714
2015	Fufeng County	361807	978700	0.369681	0.369681
2016	Fufeng County	374923	1081600	0.346637	0.346637
2017	Fufeng County	383283	1246500	0.307487	0.307487
2018	Fufeng County	361095	1398717	0.258162	0.258162
2019	Fufeng County	379270	1471413	0.257759	0.257759
2020	Fufeng County	397445	1545066	0.257235	0.257235
2021	Fufeng County	415620	1735681	0.239456	0.239456
2012	Fengxiang District	338535	1430100	0.236721	0.236721
2013	Fengxiang District	371181	1619600	0.229181	0.229181
2014	Fengxiang District	398017	1818100	0.218919	0.218919
2015	Fengxiang District	406835	1877600	0.216678	0.216678
2016	Fengxiang District	421979	2020400	0.208859	0.208859
2017	Fengxiang District	432245	2088500	0.206964	0.206964
2018	Fengxiang District	402375	2167995	0.185598	0.185598
2019	Fengxiang District	438770	2236551	0.196182	0.196182
2020	Fengxiang District	475165	2397666	0.198178	0.198178
2021	Fengxiang District	511560	2642959	0.193556	0.193556
2012	Qishan County	323161	1340100	0.241147	0.241147
2013	Qishan County	351924	1440900	0.244239	0.244239
2014	Qishan County	375889	1491000	0.252105	0.252105
2015	Qishan County	384523	1438500	0.267308	0.267308
2016	Qishan County	396887	1561100	0.254235	0.254235
2017	Qishan County	408461	1886300	0.216541	0.216541
2018	Qishan County	390555	1930974	0.202258	0.202258
2019	Qishan County	422256	1793382	0.235452	0.235452
2020	Qishan County	453957	1690945	0.268463	0.268463
2021	Qishan County	485658	1747059	0.277986	0.277986
2012	Long County	266633	433000	0.615781	0.615781
2013	Long County	286761	498800	0.574902	0.574902
2014	Long County	305299	571600	0.534113	0.534113
2015	Long County	313671	597800	0.524709	0.524709
2016	Long County	328986	675500	0.487026	0.487026
2017	Long County	346775	848200	0.408836	0.408836
2018	Long County	316174	974213	0.324543	0.324543
2019	Long County	343972	915529	0.375708	0.375708
2020	Long County	371770	986618	0.376813	0.376813
2021	Long County	399568	1088482	0.367087	0.367087
2012	Qianyang County	140736	259400	0.542544	0.542544
2013	Qianyang County	154688	310100	0.498833	0.498833
2014	Qianyang County	160611	350600	0.458103	0.458103
2015	Qianyang County	168664	411100	0.410275	0.410275
2016	Qianyang County	181288	486600	0.372561	0.372561
2017	Qianyang County	184024	543400	0.338653	0.338653
2018	Qianyang County	164953	597588	0.276031	0.276031
2019	Qianyang County	186395	676914	0.27536	0.27536
2020	Qianyang County	207837	738229	0.281535	0.281535
2021	Qianyang County	229279	820052	0.279591	0.279591
2012	Weibin District	63308	4071600	0.0155487	0.0155487
2013	Weibin District	69557	4272500	0.0162802	0.0162802
2014	Weibin District	74374	4457000	0.016687	0.016687
2015	Weibin District	77360	4699600	0.016461	0.016461
2016	Weibin District	77834	5005000	0.0155512	0.0155512
2017	Weibin District	80909	5311700	0.0152322	0.0152322
2018	Weibin District	79619	5463000	0.0145742	0.0145742
2019	Weibin District	86124	5211400	0.0165261	0.0165261
2020	Weibin District	92629	5353900	0.0173012	0.0173012
2021	Weibin District	99134	5496400	0.0180362	0.0180362
2012	Jintai District	37857	2412500	0.015692	0.015692
2013	Jintai District	41236	2757300	0.0149552	0.0149552
2014	Jintai District	43570	2954500	0.014747	0.014747
2015	Jintai District	45197	3042300	0.0148562	0.0148562
2016	Jintai District	47906	3385000	0.0141524	0.0141524
2017	Jintai District	48336	3578100	0.0135088	0.0135088
2018	Jintai District	43330	3706500	0.0116903	0.0116903
2019	Jintai District	46448	3649500	0.0127272	0.0127272
2020	Jintai District	49566	3625500	0.0136715	0.0136715
2021	Jintai District	52684	3601500	0.0146283	0.0146283
2012	Jingyang County	632757	1180200	0.536144	0.536144
2013	Jingyang County	701427	1350100	0.519537	0.519537
2014	Jingyang County	737796	1520300	0.485296	0.485296
2015	Jingyang County	756662	1602300	0.472235	0.472235
2016	Jingyang County	791330	1790400	0.441985	0.441985
2017	Jingyang County	528502	759600	0.695764	0.695764
2018	Jingyang County	476980	754310	0.632339	0.632339
2019	Jingyang County	507076	757300	0.669584	0.669584
2020	Jingyang County	537172	808970	0.66402	0.66402
2021	Jingyang County	567268	1167780	0.485766	0.485766
2012	Sanyuan County	450714	1204800	0.374099	0.374099
2013	Sanyuan County	488895	1408100	0.347202	0.347202
2014	Sanyuan County	509048	1601300	0.317897	0.317897
2015	Sanyuan County	514073	1776300	0.289407	0.289407
2016	Sanyuan County	530811	1935100	0.274307	0.274307
2017	Sanyuan County	541711	2360900	0.229451	0.229451
2018	Sanyuan County	473577	2397556	0.197525	0.197525
2019	Sanyuan County	512923	2153480	0.238183	0.238183
2020	Sanyuan County	552269	2077589	0.265822	0.265822
2021	Sanyuan County	591615	2360850	0.250594	0.250594
2012	Liquan County	665289	1086200	0.612492	0.612492
2013	Liquan County	729211	1278600	0.57032	0.57032
2014	Liquan County	781606	1450200	0.538964	0.538964
2015	Liquan County	796999	1518300	0.524929	0.524929
2016	Liquan County	851118	1641500	0.5185	0.5185
2017	Liquan County	887487	1741700	0.509552	0.509552
2018	Liquan County	762998	1605154	0.475343	0.475343
2019	Liquan County	812990	1535000	0.529635	0.529635
2020	Liquan County	862982	1561800	0.552556	0.552556
2021	Liquan County	912974	1721301	0.530398	0.530398
2012	Qindu District	238008	3300400	0.0721149	0.0721149
2013	Qindu District	270448	3752900	0.0720637	0.0720637
2014	Qindu District	285600	4250100	0.0671984	0.0671984
2015	Qindu District	299386	4665400	0.0641716	0.0641716
2016	Qindu District	316937	5196000	0.0609963	0.0609963
2017	Qindu District	131851	4010000	0.0328805	0.0328805
2018	Qindu District	130344	3828200	0.0340484	0.0340484
2019	Qindu District	134540	3438500	0.0391275	0.0391275
2020	Qindu District	138736	3619400	0.0383312	0.0383312
2021	Qindu District	142932	3800300	0.0376107	0.0376107
2012	Weicheng District	200596	2664400	0.0752875	0.0752875
2013	Weicheng District	223316	3052200	0.0731656	0.0731656
2014	Weicheng District	232705	3164300	0.0735408	0.0735408
2015	Weicheng District	240934	3130900	0.0769536	0.0769536
2016	Weicheng District	249961	3449000	0.0724735	0.0724735
2017	Weicheng District	258988	3039200	0.0852158	0.0852158
2018	Weicheng District	268015	3787200	0.0707686	0.0707686
2019	Weicheng District	277042	2565900	0.107971	0.107971
2020	Weicheng District	286069	2745700	0.104188	0.104188
2021	Weicheng District	295096	2925500	0.10087	0.10087
2012	Qian County	426941	1080900	0.394987	0.394987
2013	Qian County	465953	1272100	0.366286	0.366286
2014	Qian County	513509	1450400	0.354046	0.354046
2015	Qian County	535346	1507400	0.355145	0.355145
2016	Qian County	556117	1623800	0.342479	0.342479
2017	Qian County	564452	1789400	0.315442	0.315442
2018	Qian County	504717	1736460	0.290659	0.290659
2019	Qian County	525600	1716220	0.306254	0.306254
2020	Qian County	546483	1556210	0.351163	0.351163
2021	Qian County	567366	1758100	0.322715	0.322715
2012	Wugong County	293249	741400	0.395534	0.395534
2013	Wugong County	323023	959400	0.336693	0.336693
2014	Wugong County	348078	1100400	0.31632	0.31632
2015	Wugong County	362655	1124500	0.322503	0.322503
2016	Wugong County	385201	1232500	0.312536	0.312536
2017	Wugong County	407256	1409000	0.289039	0.289039
2018	Wugong County	361151	1412380	0.255704	0.255704
2019	Wugong County	391253	1531550	0.255462	0.255462
2020	Wugong County	421355	1545850	0.272572	0.272572
2021	Wugong County	451457	1713500	0.263471	0.263471
2012	Xingping City	325470	1452000	0.224153	0.224153
2013	Xingping City	362534	1752200	0.206902	0.206902
2014	Xingping City	384997	1827700	0.210646	0.210646
2015	Xingping City	388869	1916993	0.202854	0.202854
2016	Xingping City	415054	2176700	0.19068	0.19068
2017	Xingping City	394385	2411100	0.163571	0.163571
2018	Xingping City	326852	2483302	0.13162	0.13162
2019	Xingping City	364691	2416440	0.150921	0.150921
2020	Xingping City	402530	2421100	0.166259	0.166259
2021	Xingping City	440369	2809539	0.156741	0.156741
2012	Tongguan County	52526	328000	0.16014	0.16014
2013	Tongguan County	60204	387500	0.155365	0.155365
2014	Tongguan County	64299	411000	0.156445	0.156445
2015	Tongguan County	66261	365500	0.181289	0.181289
2016	Tongguan County	69086	369000	0.187225	0.187225
2017	Tongguan County	71616	457700	0.156469	0.156469
2018	Tongguan County	87342	403487	0.216468	0.216468
2019	Tongguan County	96342	441972	0.217982	0.217982
2020	Tongguan County	105342	440851	0.238951	0.238951
2021	Tongguan County	114342	473732	0.241364	0.241364
2012	Huazhou District	138149	1106900	0.124807	0.124807
2013	Huazhou District	155283	1144300	0.135701	0.135701
2014	Huazhou District	166851	1157500	0.144148	0.144148
2015	Huazhou District	171806	1080300	0.159035	0.159035
2016	Huazhou District	179231	882200	0.203164	0.203164
2017	Huazhou District	184469	949800	0.194219	0.194219
2018	Huazhou District	227018	756097	0.30025	0.30025
2019	Huazhou District	251489	993373	0.253167	0.253167
2020	Huazhou District	275960	965843	0.285719	0.285719
2021	Huazhou District	300431	1119800	0.26829	0.26829
2012	Huayin City	85727	676300	0.126759	0.126759
2013	Huayin City	97577	740600	0.131754	0.131754
2014	Huayin City	104549	783500	0.133438	0.133438
2015	Huayin City	107973	804200	0.134261	0.134261
2016	Huayin City	113091	700200	0.161512	0.161512
2017	Huayin City	116610	849600	0.137253	0.137253
2018	Huayin City	150071	911614	0.164621	0.164621
2019	Huayin City	164867	707898	0.232897	0.232897
2020	Huayin City	179663	724847	0.247863	0.247863
2021	Huayin City	194459	776000	0.250591	0.250591
2012	Linwei District	527055	2625200	0.200768	0.200768
2013	Linwei District	590453	2737400	0.215698	0.215698
2014	Linwei District	630349	3037900	0.207495	0.207495
2015	Linwei District	653461	3068100	0.212986	0.212986
2016	Linwei District	687069	3326700	0.206532	0.206532
2017	Linwei District	704352	3705200	0.190098	0.190098
2018	Linwei District	846456	4196400	0.20171	0.20171
2019	Linwei District	850412	4276100	0.198876	0.198876
2020	Linwei District	854368	4418900	0.193344	0.193344
2021	Linwei District	858324	4561700	0.188159	0.188159
2012	Dali County	483972	1005800	0.481181	0.481181
2013	Dali County	543715	1098400	0.495006	0.495006
2014	Dali County	584115	1123700	0.519814	0.519814
2015	Dali County	597803	1047300	0.570804	0.570804
2016	Dali County	630040	1159500	0.543372	0.543372
2017	Dali County	648934	1620400	0.400478	0.400478
2018	Dali County	772302	1505775	0.512893	0.512893
2019	Dali County	859041	1685611	0.509632	0.509632
2020	Dali County	945780	1755100	0.538875	0.538875
2021	Dali County	1032519	1924624	0.536478	0.536478
2012	Pucheng County	363911	1300100	0.27991	0.27991
2013	Pucheng County	411106	1418700	0.289777	0.289777
2014	Pucheng County	440782	1516200	0.290715	0.290715
2015	Pucheng County	455728	1551600	0.293715	0.293715
2016	Pucheng County	479333	1631300	0.293835	0.293835
2017	Pucheng County	493902	1815300	0.272077	0.272077
2018	Pucheng County	590033	1906335	0.309512	0.309512
2019	Pucheng County	638098	1941567	0.328651	0.328651
2020	Pucheng County	686163	2035357	0.337122	0.337122
2021	Pucheng County	734228	2259974	0.324883	0.324883
2012	Fuping County	397056	1001000	0.396659	0.396659
2013	Fuping County	445089	1201200	0.370537	0.370537
2014	Fuping County	477479	1355100	0.352357	0.352357
2015	Fuping County	494383	1303500	0.379273	0.379273
2016	Fuping County	520442	1373000	0.379055	0.379055
2017	Fuping County	532776	1444800	0.368754	0.368754
2018	Fuping County	668497	1659967	0.402717	0.402717
2019	Fuping County	741886	1839644	0.403277	0.403277
2020	Fuping County	815275	1930770	0.422254	0.422254
2021	Fuping County	888664	2146643	0.413978	0.413978
2012	Shenmu City	205324	10038900	0.0204528	0.0204528
2013	Shenmu City	214584	9255400	0.0231847	0.0231847
2014	Shenmu City	215555	9682400	0.0222626	0.0222626
2015	Shenmu City	280183	8174100	0.0342769	0.0342769
2016	Shenmu City	242464	9048000	0.0267975	0.0267975
2017	Shenmu City	361933	11103300	0.0325969	0.0325969
2018	Shenmu City	410931	12980300	0.0316581	0.0316581
2019	Shenmu City	459929	13628777	0.0337469	0.0337469
2020	Shenmu City	508927	12940036	0.0393296	0.0393296
2021	Shenmu City	322257	18481700	0.0174365	0.0174365
2012	Yuyang District	359612	4010900	0.0896587	0.0896587
2013	Yuyang District	395612	4612600	0.0857677	0.0857677
2014	Yuyang District	430033	5085700	0.0845573	0.0845573
2015	Yuyang District	444494	5431000	0.0818439	0.0818439
2016	Yuyang District	503933	5567200	0.0905182	0.0905182
2017	Yuyang District	512097	6984700	0.073317	0.073317
2018	Yuyang District	648923	7772800	0.0834864	0.0834864
2019	Yuyang District	714010	9371400	0.0761903	0.0761903
2020	Yuyang District	779097	10010200	0.0778303	0.0778303
2021	Yuyang District	844184	10649000	0.0792735	0.0792735
2012	Hengshan District	205689	1042200	0.19736	0.19736
2013	Hengshan District	232421	1218500	0.190744	0.190744
2014	Hengshan District	246554	1360900	0.18117	0.18117
2015	Hengshan District	248690	1165100	0.213449	0.213449
2016	Hengshan District	111732	1211600	0.0922186	0.0922186
2017	Hengshan District	286790	1544600	0.185673	0.185673
2018	Hengshan District	422450	1894400	0.222999	0.222999
2019	Hengshan District	474796	2014700	0.235666	0.235666
2020	Hengshan District	527142	1994305	0.264324	0.264324
2021	Hengshan District	579488	2734700	0.211902	0.211902
2012	Jingbian County	317568	3170500	0.100163	0.100163
2013	Jingbian County	350910	3521600	0.099645	0.099645
2014	Jingbian County	355569	3651900	0.0973655	0.0973655
2015	Jingbian County	399931	2668400	0.149877	0.149877
2016	Jingbian County	412931	2449400	0.168585	0.168585
2017	Jingbian County	529672	3039100	0.174286	0.174286
2018	Jingbian County	563266	2962350	0.190142	0.190142
2019	Jingbian County	596860	3898506	0.1531	0.1531
2020	Jingbian County	630454	3633295	0.173521	0.173521
2021	Jingbian County	249735	4500225	0.0554939	0.0554939
2012	Dingbian County	293266	2910100	0.100775	0.100775
2013	Dingbian County	323520	3100800	0.104334	0.104334
2014	Dingbian County	323223	3383900	0.0955179	0.0955179
2015	Dingbian County	354825	2576300	0.137727	0.137727
2016	Dingbian County	363114	2300300	0.157855	0.157855
2017	Dingbian County	472420	2553200	0.185031	0.185031
2018	Dingbian County	488718	3172840	0.154032	0.154032
2019	Dingbian County	505016	3176191	0.159001	0.159001
2020	Dingbian County	521314	2631600	0.198098	0.198098
2021	Dingbian County	146772	3417158	0.0429515	0.0429515
2012	Fugu County	86360	4505200	0.019169	0.019169
2013	Fugu County	92635	4353800	0.0212768	0.0212768
2014	Fugu County	101206	4365300	0.0231842	0.0231842
2015	Fugu County	100327	3837600	0.0261432	0.0261432
2016	Fugu County	238197	3925700	0.0606763	0.0606763
2017	Fugu County	117485	4856300	0.0241923	0.0241923
2018	Fugu County	155654	5395771	0.0288474	0.0288474
2019	Fugu County	168525	6175064	0.0272912	0.0272912
2020	Fugu County	181396	5828060	0.0311246	0.0311246
2021	Fugu County	194267	7358846	0.0263991	0.0263991
2012	Jia County	147758	318600	0.463773	0.463773
2013	Jia County	155538	365600	0.425432	0.425432
2014	Jia County	151820	414700	0.366096	0.366096
2015	Jia County	176965	344400	0.513836	0.513836
2016	Jia County	186577	398000	0.468786	0.468786
2017	Jia County	289748	505100	0.573645	0.573645
2018	Jia County	307097	549186	0.559186	0.559186
2019	Jia County	324446	575895	0.563377	0.563377
2020	Jia County	341795	633332	0.539677	0.539677
2021	Jia County	34621	717500	0.0482523	0.0482523
2012	Wubu County	36487	137700	0.264975	0.264975
2013	Wubu County	39133	159900	0.244734	0.244734
2014	Wubu County	38156	178000	0.21436	0.21436
2015	Wubu County	50695	167600	0.302476	0.302476
2016	Wubu County	53581	179700	0.298169	0.298169
2017	Wubu County	91282	208800	0.437174	0.437174
2018	Wubu County	102165	234071	0.43647	0.43647
2019	Wubu County	113048	269128	0.420053	0.420053
2020	Wubu County	123931	286112	0.433156	0.433156
2021	Wubu County	180483	312865	0.576872	0.576872
2012	Mizhi County	93653	401200	0.233432	0.233432
2013	Mizhi County	100865	466400	0.216263	0.216263
2014	Mizhi County	97077	486600	0.199501	0.199501
2015	Mizhi County	118896	415300	0.286289	0.286289
2016	Mizhi County	123884	448400	0.27628	0.27628
2017	Mizhi County	167591	480000	0.349148	0.349148
2018	Mizhi County	192511	575800	0.334337	0.334337
2019	Mizhi County	217431	655712	0.331595	0.331595
2020	Mizhi County	242351	628700	0.38548	0.38548
2021	Mizhi County	141701	700700	0.202228	0.202228
2012	Suide County	158733	476200	0.333333	0.333333
2013	Suide County	171872	539500	0.318576	0.318576
2014	Suide County	167692	540900	0.310024	0.310024
2015	Suide County	183963	588700	0.31249	0.31249
2016	Suide County	193974	671500	0.288867	0.288867
2017	Suide County	334733	758700	0.441193	0.441193
2018	Suide County	356059	939738	0.378892	0.378892
2019	Suide County	377385	905484	0.416777	0.416777
2020	Suide County	398711	1001520	0.398106	0.398106
2021	Suide County	86083	1111707	0.0774332	0.0774332
2012	Zizhou County	155906	401600	0.388212	0.388212
2013	Zizhou County	168958	484000	0.349087	0.349087
2014	Zizhou County	166563	522600	0.31872	0.31872
2015	Zizhou County	196008	440300	0.445169	0.445169
2016	Zizhou County	212211	557100	0.380921	0.380921
2017	Zizhou County	281097	624600	0.450043	0.450043
2018	Zizhou County	290372	636324	0.456327	0.456327
2019	Zizhou County	299647	599600	0.499745	0.499745
2020	Zizhou County	308922	679304	0.454763	0.454763
2021	Zizhou County	180649	772800	0.233759	0.233759
2012	Qingjian County	198024	306800	0.64545	0.64545
2013	Qingjian County	197172	354600	0.556041	0.556041
2014	Qingjian County	191669	394000	0.48647	0.48647
2015	Qingjian County	207813	410500	0.506244	0.506244
2016	Qingjian County	217007	439100	0.494209	0.494209
2017	Qingjian County	305699	510800	0.598471	0.598471
2018	Qingjian County	328863	585700	0.561487	0.561487
2019	Qingjian County	352027	614100	0.573241	0.573241
2020	Qingjian County	375191	630830	0.594758	0.594758
2021	Qingjian County	140797	696500	0.202149	0.202149
2012	Baota District	184619	2033100	0.0908066	0.0908066
2013	Baota District	198094	2165700	0.0914688	0.0914688
2014	Baota District	214744	2433900	0.0882304	0.0882304
2015	Baota District	202553	2694000	0.0751867	0.0751867
2016	Baota District	214136	2551300	0.0839321	0.0839321
2017	Baota District	221711	2912300	0.0761292	0.0761292
2018	Baota District	277751	3289500	0.0844356	0.0844356
2019	Baota District	296634	3639100	0.081513	0.081513
2020	Baota District	315517	3685400	0.0856127	0.0856127
2021	Baota District	334400	3731700	0.0896106	0.0896106
2012	Zichang City	114146	745600	0.153093	0.153093
2013	Zichang City	125566	831300	0.151048	0.151048
2014	Zichang City	128972	811200	0.158989	0.158989
2015	Zichang City	115647	722200	0.160132	0.160132
2016	Zichang City	128305	749700	0.171142	0.171142
2017	Zichang City	128829	971900	0.132554	0.132554
2018	Zichang City	124316	1145757	0.108501	0.108501
2019	Zichang City	127166	1110650	0.114497	0.114497
2020	Zichang City	130016	1000141	0.129998	0.129998
2021	Zichang City	132866	1356686	0.0979342	0.0979342
2012	Yanchuan County	83862	823800	0.101799	0.101799
2013	Yanchuan County	97488	945600	0.103096	0.103096
2014	Yanchuan County	109300	1001700	0.109115	0.109115
2015	Yanchuan County	118827	704400	0.168693	0.168693
2016	Yanchuan County	133672	681100	0.196259	0.196259
2017	Yanchuan County	136680	806500	0.169473	0.169473
2018	Yanchuan County	163918	1143557	0.14334	0.14334
2019	Yanchuan County	169243	994370	0.170201	0.170201
2020	Yanchuan County	174568	1017800	0.171515	0.171515
2021	Yanchuan County	179893	1189725	0.151206	0.151206
2012	Yanchang County	128152	340900	0.375923	0.375923
2013	Yanchang County	141856	376700	0.376576	0.376576
2014	Yanchang County	153645	410900	0.373923	0.373923
2015	Yanchang County	152321	430000	0.354235	0.354235
2016	Yanchang County	147698	378200	0.390529	0.390529
2017	Yanchang County	150874	459900	0.328058	0.328058
2018	Yanchang County	179965	540779	0.332788	0.332788
2019	Yanchang County	185484	528700	0.35083	0.35083
2020	Yanchang County	191003	540600	0.353317	0.353317
2021	Yanchang County	196522	684939	0.286919	0.286919
2012	Ansai District	113293	1057500	0.107133	0.107133
2013	Ansai District	125010	1043200	0.119833	0.119833
2014	Ansai District	131228	1064400	0.123288	0.123288
2015	Ansai District	131628	971000	0.135559	0.135559
2016	Ansai District	147381	766700	0.192228	0.192228
2017	Ansai District	158052	913000	0.173113	0.173113
2018	Ansai District	220660	1072200	0.205801	0.205801
2019	Ansai District	232223	1146310	0.202583	0.202583
2020	Ansai District	243786	1112604	0.219113	0.219113
2021	Ansai District	255349	1457189	0.175234	0.175234
2012	Zhidan County	72235	1759800	0.0410473	0.0410473
2013	Zhidan County	80143	1678900	0.0477354	0.0477354
2014	Zhidan County	85421	1666200	0.051267	0.051267
2015	Zhidan County	93086	1341400	0.0693947	0.0693947
2016	Zhidan County	101813	1075900	0.0946305	0.0946305
2017	Zhidan County	101002	1329900	0.0759471	0.0759471
2018	Zhidan County	139237	1499800	0.092837	0.092837
2019	Zhidan County	139964	1615520	0.0866371	0.0866371
2020	Zhidan County	140691	1416695	0.0993093	0.0993093
2021	Zhidan County	141418	1964136	0.0720001	0.0720001
2012	Wuqi County	70880	2010700	0.0352514	0.0352514
2013	Wuqi County	79048	2097000	0.0376958	0.0376958
2014	Wuqi County	83532	2115100	0.0394932	0.0394932
2015	Wuqi County	87264	1404700	0.0621229	0.0621229
2016	Wuqi County	84473	1086500	0.0777478	0.0777478
2017	Wuqi County	86403	1353400	0.0638414	0.0638414
2018	Wuqi County	107332	1506676	0.0712376	0.0712376
2019	Wuqi County	111937	1787260	0.0626305	0.0626305
2020	Wuqi County	116542	1501324	0.0776261	0.0776261
2021	Wuqi County	121147	2104872	0.0575555	0.0575555
2012	Ganquan County	64988	205000	0.317015	0.317015
2013	Ganquan County	73320	213000	0.344225	0.344225
2014	Ganquan County	78243	224400	0.348676	0.348676
2015	Ganquan County	79187	216200	0.366267	0.366267
2016	Ganquan County	81123	205800	0.394184	0.394184
2017	Ganquan County	83317	234000	0.356056	0.356056
2018	Ganquan County	87686	266538	0.328981	0.328981
2019	Ganquan County	91039	290770	0.313096	0.313096
2020	Ganquan County	94392	288399	0.327297	0.327297
2021	Ganquan County	97745	330692	0.295577	0.295577
2012	Luochuan County	342897	2130400	0.160954	0.160954
2013	Luochuan County	375878	2473400	0.151968	0.151968
2014	Luochuan County	400197	2294400	0.174423	0.174423
2015	Luochuan County	360148	1854800	0.194171	0.194171
2016	Luochuan County	386336	1517300	0.254621	0.254621
2017	Luochuan County	387282	1497800	0.258567	0.258567
2018	Luochuan County	330942	2439861	0.13564	0.13564
2019	Luochuan County	432143	2438730	0.1772	0.1772
2020	Luochuan County	533344	2416417	0.220717	0.220717
2021	Luochuan County	634545	2790488	0.227396	0.227396
2012	Fu County	185474	301200	0.615784	0.615784
2013	Fu County	208475	324900	0.641659	0.641659
2014	Fu County	227397	389500	0.583818	0.583818
2015	Fu County	217842	409500	0.531971	0.531971
2016	Fu County	241647	447100	0.540476	0.540476
2017	Fu County	249351	529100	0.471274	0.471274
2018	Fu County	283096	626780	0.451667	0.451667
2019	Fu County	296493	663700	0.446727	0.446727
2020	Fu County	309890	723705	0.428199	0.428199
2021	Fu County	323287	831275	0.388905	0.388905
2012	Huangling County	110239	1034000	0.106614	0.106614
2013	Huangling County	122464	1085300	0.112839	0.112839
2014	Huangling County	142682	1113600	0.128127	0.128127
2015	Huangling County	137067	862000	0.15901	0.15901
2016	Huangling County	143451	958400	0.149678	0.149678
2017	Huangling County	145868	1198200	0.121739	0.121739
2018	Huangling County	165652	1524078	0.10869	0.10869
2019	Huangling County	172932	1859250	0.0930117	0.0930117
2020	Huangling County	180212	1690104	0.106628	0.106628
2021	Huangling County	63990	88600	0.722235	0.722235
2012	Huanglong County	69163	101600	0.680738	0.680738
2013	Huanglong County	80656	111100	0.725977	0.725977
2014	Huanglong County	82839	132700	0.624258	0.624258
2015	Huanglong County	85086	139600	0.609499	0.609499
2016	Huanglong County	87846	154200	0.569689	0.569689
2017	Huanglong County	78888	170300	0.46323	0.46323
2018	Huanglong County	100434	186690	0.537972	0.537972
2019	Huanglong County	121980	195301	0.624574	0.624574
2020	Huanglong County	143526	225344	0.63692	0.63692
2021	Huanglong County	162137	185800	0.872643	0.872643
2012	Yichuan County	181592	207800	0.873879	0.873879
2013	Yichuan County	196008	227200	0.862711	0.862711
2014	Yichuan County	197875	253200	0.781497	0.781497
2015	Yichuan County	202531	279200	0.725398	0.725398
2016	Yichuan County	203724	303200	0.671913	0.671913
2017	Yichuan County	251732	362603	0.694236	0.694236
2018	Yichuan County	255004	377830	0.674917	0.674917
2019	Yichuan County	258276	424045	0.609077	0.609077
2020	Yichuan County	261548	455735	0.573904	0.573904
2021	Yichuan County	92575	212100	0.436469	0.436469
2012	Yijun County	103544	258400	0.400712	0.400712
2013	Yijun County	112333	295400	0.380274	0.380274
2014	Yijun County	111304	325300	0.342158	0.342158
2015	Yijun County	116691	331100	0.352434	0.352434
2016	Yijun County	119934	380500	0.315201	0.315201
2017	Yijun County	109518	305630	0.358335	0.358335
2018	Yijun County	115138	331865	0.346942	0.346942
2019	Yijun County	120758	360810	0.334686	0.334686
2020	Yijun County	126378	427400	0.29569	0.29569
2021	Yijun County	160530	1275600	0.125847	0.125847
2012	Yaozhou District	179850	1407100	0.127816	0.127816
2013	Yaozhou District	194054	1507800	0.1287	0.1287
2014	Yaozhou District	196590	1421100	0.138336	0.138336
2015	Yaozhou District	206613	1275000	0.162049	0.162049
2016	Yaozhou District	212775	1459800	0.145756	0.145756
2017	Yaozhou District	245015	1333890	0.183685	0.183685
2018	Yaozhou District	225379	1749100	0.128854	0.128854
2019	Yaozhou District	205743	1897558	0.108425	0.108425
2020	Yaozhou District	186107	2160840	0.0861272	0.0861272
2021	Yaozhou District	17870	641200	0.0278696	0.0278696
2012	Wangyi District	19950	731700	0.0272653	0.0272653
2013	Wangyi District	21575	821600	0.0262597	0.0262597
2014	Wangyi District	22263	838800	0.0265415	0.0265415
2015	Wangyi District	23179	877400	0.0264178	0.0264178
2016	Wangyi District	23925	1002300	0.0238701	0.0238701
2017	Wangyi District	22949	872400	0.0263056	0.0263056
2018	Wangyi District	25777	848200	0.0303902	0.0303902
2019	Wangyi District	28605	927500	0.030841	0.030841
2020	Wangyi District	31433	1006800	0.0312207	0.0312207
2021	Wangyi District	74923	700200	0.107002	0.107002
2012	Yintai District	84041	822600	0.102165	0.102165
2013	Yintai District	90846	779400	0.116559	0.116559
2014	Yintai District	92086	660300	0.139461	0.139461
2015	Yintai District	96681	632600	0.152831	0.152831
2016	Yintai District	98900	643400	0.153715	0.153715
2017	Yintai District	70674	767500	0.0920834	0.0920834
2018	Yintai District	76753	617500	0.124296	0.124296
2019	Yintai District	82832	631600	0.131146	0.131146
2020	Yintai District	88911	645700	0.137697	0.137697
2021	Yintai District	313727	555000	0.565274	0.565274
2012	Baishui County	359886	612100	0.587953	0.587953
2013	Baishui County	398236	663000	0.600658	0.600658
2014	Baishui County	414710	615400	0.673887	0.673887
2015	Baishui County	437159	629700	0.694234	0.694234
2016	Baishui County	450236	722300	0.623337	0.623337
2017	Baishui County	538547	774973	0.694924	0.694924
2018	Baishui County	580266	845257	0.686497	0.686497
2019	Baishui County	621985	841442	0.739189	0.739189
2020	Baishui County	663704	936832	0.708456	0.708456
2021	Baishui County	311150	770700	0.403724	0.403724
2012	Chengcheng County	343357	830100	0.413633	0.413633
2013	Chengcheng County	368722	852900	0.432316	0.432316
2014	Chengcheng County	380550	822600	0.462619	0.462619
2015	Chengcheng County	402459	790400	0.509184	0.509184
2016	Chengcheng County	412496	856900	0.481382	0.481382
2017	Chengcheng County	508307	878458	0.578636	0.578636
2018	Chengcheng County	564600	984934	0.573236	0.573236
2019	Chengcheng County	620893	1035419	0.599654	0.599654
2020	Chengcheng County	677186	1137248	0.59546	0.59546
2021	Chengcheng County	231794	2332200	0.0993886	0.0993886
2012	Hancheng City	258311	2820600	0.0915802	0.0915802
2013	Hancheng City	276872	3030100	0.0913739	0.0913739
2014	Hancheng City	287983	3112900	0.0925128	0.0925128
2015	Hancheng City	305760	3203800	0.0954367	0.0954367
2016	Hancheng City	315781	3490000	0.0904817	0.0904817
2017	Hancheng City	420899	3689941	0.114067	0.114067
2018	Hancheng City	456675	3518557	0.12979	0.12979
2019	Hancheng City	492451	3384402	0.145506	0.145506
2020	Hancheng City	528227	3745198	0.141041	0.141041
2021	Hancheng City	386944	868400	0.445583	0.445583
2012	Heyang County	274949	601000	0.457486	0.457486
2013	Heyang County	310376	678500	0.457444	0.457444
2014	Heyang County	332370	713900	0.465569	0.465569
2015	Heyang County	344712	753100	0.457724	0.457724
2016	Heyang County	363275	784700	0.462948	0.462948
2017	Heyang County	374359	924500	0.404931	0.404931
2018	Heyang County	456674	971800	0.469926	0.469926
2019	Heyang County	509299	1049762	0.485157	0.485157
2020	Heyang County	561924	1129682	0.497418	0.497418
2021	Heyang County	614549	1239066	0.495978	0.495978
2012	Xunyi County	434653	1022800	0.424964	0.424964
2013	Xunyi County	486744	1160200	0.419535	0.419535
2014	Xunyi County	512243	1049230	0.488208	0.488208
2015	Xunyi County	526502	1066300	0.493765	0.493765
2016	Xunyi County	542244	1220200	0.444389	0.444389
2017	Xunyi County	480119	965846	0.497097	0.497097
2018	Xunyi County	502679	883870	0.568725	0.568725
2019	Xunyi County	525239	892100	0.588767	0.588767
2020	Xunyi County	547799	1059300	0.517133	0.517133
2021	Xunyi County	208938	446200	0.468261	0.468261
2012	Changwu County	233416	525800	0.443925	0.443925
2013	Changwu County	292219	606100	0.48213	0.48213
2014	Changwu County	307462	688300	0.446698	0.446698
2015	Changwu County	319740	730000	0.438	0.438
2016	Changwu County	353680	959200	0.368724	0.368724
2017	Changwu County	308384	1004600	0.306972	0.306972
2018	Changwu County	343442	1022450	0.335901	0.335901
2019	Changwu County	378500	991500	0.381745	0.381745
2020	Changwu County	413558	1183200	0.349525	0.349525
2021	Changwu County	195466	348700	0.560556	0.560556
2012	Yongshou County	250900	413300	0.607065	0.607065
2013	Yongshou County	273123	448300	0.609242	0.609242
2014	Yongshou County	292511	500000	0.585022	0.585022
2015	Yongshou County	312678	586100	0.533489	0.533489
2016	Yongshou County	329220	731100	0.450308	0.450308
2017	Yongshou County	355747	854257	0.41644	0.41644
2018	Yongshou County	378301	843570	0.448452	0.448452
2019	Yongshou County	400855	846230	0.473695	0.473695
2020	Yongshou County	423409	945940	0.447607	0.447607
2021	Yongshou County	252341	1361800	0.1853	0.1853
2012	Binzhou City	277029	1654300	0.16746	0.16746
2013	Binzhou City	297830	1860900	0.160046	0.160046
2014	Binzhou City	307949	1700100	0.181136	0.181136
2015	Binzhou City	318129	1888200	0.168483	0.168483
2016	Binzhou City	338547	2136200	0.158481	0.158481
2017	Binzhou City	326564	2171140	0.150411	0.150411
2018	Binzhou City	354735	2311030	0.153496	0.153496
2019	Binzhou City	382906	2161430	0.177154	0.177154
2020	Binzhou City	411077	2701583	0.152162	0.152162
2021	Binzhou City	376957	426700	0.883424	0.883424
2012	Chunhua County	417469	502500	0.830784	0.830784
2013	Chunhua County	456662	535400	0.852936	0.852936
2014	Chunhua County	460098	573800	0.801844	0.801844
2015	Chunhua County	480087	649100	0.739619	0.739619
2016	Chunhua County	506629	747800	0.677493	0.677493
2017	Chunhua County	454796	760800	0.597787	0.597787
2018	Chunhua County	487215	775200	0.628502	0.628502
2019	Chunhua County	519634	820170	0.633569	0.633569
2020	Chunhua County	552053	907400	0.60839	0.60839
2021	Chunhua County	95471	411500	0.232007	0.232007
2012	Linyou County	102609	505900	0.202825	0.202825
2013	Linyou County	107561	557500	0.192935	0.192935
2014	Linyou County	111414	644800	0.172788	0.172788
2015	Linyou County	117637	711100	0.16543	0.16543
2016	Linyou County	120994	1065400	0.113567	0.113567
2017	Linyou County	109008	1097200	0.0993511	0.0993511
2018	Linyou County	131245	1406100	0.0933397	0.0933397
2019	Linyou County	153482	1282600	0.119665	0.119665
2020	Linyou County	175719	1790000	0.098167	0.098167
2021	Linyou County	98099	1108000	0.088537	0.088537
2012	Feng County	111174	1302100	0.0853805	0.0853805
2013	Feng County	118555	1456100	0.0814195	0.0814195
2014	Feng County	123185	1484500	0.0829808	0.0829808
2015	Feng County	128764	1707400	0.0754153	0.0754153
2016	Feng County	132856	1801000	0.0737679	0.0737679
2017	Feng County	127889	1337800	0.0955965	0.0955965
2018	Feng County	149771	776599	0.192855	0.192855
2019	Feng County	171653	798475	0.214976	0.214976
2020	Feng County	193535	914957	0.211524	0.211524
2021	Feng County	76011	137900	0.551204	0.551204
2012	Taibai County	85366	158300	0.539267	0.539267
2013	Taibai County	91208	171100	0.533068	0.533068
2014	Taibai County	99085	196000	0.505536	0.505536
2015	Taibai County	102951	209100	0.492353	0.492353
2016	Taibai County	113296	224500	0.504659	0.504659
2017	Taibai County	114573	276957	0.413685	0.413685
2018	Taibai County	127614	302589	0.42174	0.42174
2019	Taibai County	140655	374673	0.375407	0.375407
2020	Taibai County	153696	455471	0.337444	0.337444
2021	Taibai County	131357	602300	0.218092	0.218092
2012	Lueyang County	145976	658700	0.221612	0.221612
2013	Lueyang County	155719	631900	0.24643	0.24643
2014	Lueyang County	162582	504600	0.3222	0.3222
2015	Lueyang County	173098	559400	0.309435	0.309435
2016	Lueyang County	177005	675400	0.262074	0.262074
2017	Lueyang County	149368	723484	0.206457	0.206457
2018	Lueyang County	166394	711655	0.233813	0.233813
2019	Lueyang County	183420	638300	0.287357	0.287357
2020	Lueyang County	200446	697000	0.287584	0.287584
2021	Lueyang County	254727	485000	0.52521	0.52521
2012	Ningqiang County	283862	558500	0.508258	0.508258
2013	Ningqiang County	301567	619300	0.486948	0.486948
2014	Ningqiang County	315377	641200	0.491854	0.491854
2015	Ningqiang County	337556	715400	0.471842	0.471842
2016	Ningqiang County	343467	833000	0.412325	0.412325
2017	Ningqiang County	287797	890472	0.323196	0.323196
2018	Ningqiang County	319083	1000117	0.319046	0.319046
2019	Ningqiang County	350369	1066383	0.328558	0.328558
2020	Ningqiang County	381655	1249922	0.305343	0.305343
2021	Ningqiang County	18252	48300	0.377888	0.377888
2012	Foping County	20379	57900	0.351969	0.351969
2013	Foping County	21795	66500	0.327744	0.327744
2014	Foping County	23135	73200	0.316052	0.316052
2015	Foping County	24469	85600	0.285853	0.285853
2016	Foping County	25142	98000	0.256551	0.256551
2017	Foping County	30361	109026	0.278475	0.278475
2018	Foping County	33463	114767	0.291573	0.291573
2019	Foping County	36565	118813	0.307753	0.307753
2020	Foping County	39667	130502	0.303957	0.303957
2021	Foping County	42369	87800	0.482563	0.482563
2012	Liuba County	47257	100700	0.469285	0.469285
2013	Liuba County	50856	114200	0.445324	0.445324
2014	Liuba County	52745	127700	0.413038	0.413038
2015	Liuba County	56014	141100	0.396981	0.396981
2016	Liuba County	57788	156900	0.368311	0.368311
2017	Liuba County	52872	169218	0.312449	0.312449
2018	Liuba County	58928	186946	0.315214	0.315214
2019	Liuba County	64984	199000	0.326553	0.326553
2020	Liuba County	71040	220500	0.322177	0.322177
2021	Liuba County	264662	549600	0.481554	0.481554
2012	Xixiang County	294714	652000	0.452015	0.452015
2013	Xixiang County	313732	753800	0.416201	0.416201
2014	Xixiang County	330407	812000	0.406905	0.406905
2015	Xixiang County	356141	906900	0.392702	0.392702
2016	Xixiang County	362564	1017300	0.356398	0.356398
2017	Xixiang County	372926	1108536	0.336413	0.336413
2018	Xixiang County	417399	1167013	0.357664	0.357664
2019	Xixiang County	461872	1221203	0.378211	0.378211
2020	Xixiang County	506345	1339840	0.377915	0.377915
2021	Xixiang County	215886	405000	0.533052	0.533052
2012	Zhenba County	240308	481400	0.499186	0.499186
2013	Zhenba County	257282	564200	0.456012	0.456012
2014	Zhenba County	268989	583000	0.461388	0.461388
2015	Zhenba County	287859	651700	0.441705	0.441705
2016	Zhenba County	295207	785100	0.376012	0.376012
2017	Zhenba County	299125	845579	0.353752	0.353752
2018	Zhenba County	331828	924474	0.358937	0.358937
2019	Zhenba County	364531	829889	0.439253	0.439253
2020	Zhenba County	397234	946855	0.41953	0.41953
2021	Zhenba County	248738	1562900	0.159152	0.159152
2012	Hantai District	276641	1771400	0.156171	0.156171
2013	Hantai District	294765	2038900	0.144571	0.144571
2014	Hantai District	306742	2302500	0.133221	0.133221
2015	Hantai District	330189	2522700	0.130887	0.130887
2016	Hantai District	336786	2874000	0.117184	0.117184
2017	Hantai District	261343	3225400	0.0810265	0.0810265
2018	Hantai District	287841	3760600	0.0765412	0.0765412
2019	Hantai District	314339	3758000	0.0836453	0.0836453
2020	Hantai District	340837	3755400	0.0907592	0.0907592
2021	Hantai District	304966	965900	0.315732	0.315732
2012	Mian County	338204	1054400	0.320755	0.320755
2013	Mian County	359608	1114100	0.322779	0.322779
2014	Mian County	377187	1057500	0.356678	0.356678
2015	Mian County	405494	1011600	0.400844	0.400844
2016	Mian County	410295	1292700	0.317394	0.317394
2017	Mian County	377477	1473784	0.256128	0.256128
2018	Mian County	418953	1470256	0.284952	0.284952
2019	Mian County	460429	1609297	0.286106	0.286106
2020	Mian County	501905	1787398	0.280802	0.280802
2021	Mian County	330886	1149000	0.287977	0.287977
2012	Nanzheng District	367411	1344600	0.273249	0.273249
2013	Nanzheng District	392411	1540400	0.254746	0.254746
2014	Nanzheng District	412008	1648800	0.249884	0.249884
2015	Nanzheng District	443339	1740700	0.25469	0.25469
2016	Nanzheng District	449362	1924300	0.23352	0.23352
2017	Nanzheng District	533661	2168570	0.246089	0.246089
2018	Nanzheng District	590131	2184111	0.270193	0.270193
2019	Nanzheng District	646601	2255445	0.286684	0.286684
2020	Nanzheng District	703071	2397475	0.293255	0.293255
2021	Nanzheng District	612689	1203000	0.509301	0.509301
2012	Chenggu County	679674	1382900	0.491485	0.491485
2013	Chenggu County	726539	1688400	0.430312	0.430312
2014	Chenggu County	748832	1925200	0.388963	0.388963
2015	Chenggu County	800481	2172200	0.368512	0.368512
2016	Chenggu County	819382	2467400	0.332083	0.332083
2017	Chenggu County	760152	2603995	0.291918	0.291918
2018	Chenggu County	834598	2324408	0.359058	0.359058
2019	Chenggu County	909044	2514139	0.361573	0.361573
2020	Chenggu County	983490	2824379	0.348215	0.348215
2021	Chenggu County	322047	737500	0.436674	0.436674
2012	Yang County	356278	850500	0.418904	0.418904
2013	Yang County	380783	944000	0.403372	0.403372
2014	Yang County	398639	1002600	0.397605	0.397605
2015	Yang County	427962	1065300	0.401729	0.401729
2016	Yang County	436301	1209000	0.360878	0.360878
2017	Yang County	507236	1400625	0.36215	0.36215
2018	Yang County	559221	1631580	0.342748	0.342748
2019	Yang County	611206	1723561	0.354618	0.354618
2020	Yang County	663191	1929023	0.343796	0.343796
2021	Yang County	361282	1630300	0.221605	0.221605
2012	Hanbin District	376875	1874700	0.201032	0.201032
2013	Hanbin District	387029	2103900	0.183958	0.183958
2014	Hanbin District	403961	2337200	0.17284	0.17284
2015	Hanbin District	421483	2521600	0.167149	0.167149
2016	Hanbin District	543078	2909200	0.186676	0.186676
2017	Hanbin District	605722	3423600	0.176925	0.176925
2018	Hanbin District	668366	3809500	0.175447	0.175447
2019	Hanbin District	731010	3758200	0.194511	0.194511
2020	Hanbin District	167092	362300	0.461198	0.461198
2021	Hanbin District	102303	255600	0.400246	0.400246
2012	Langao County	106117	309600	0.342755	0.342755
2013	Langao County	112891	351100	0.321535	0.321535
2014	Langao County	119031	401300	0.296614	0.296614
2015	Langao County	124159	455300	0.272697	0.272697
2016	Langao County	145256	525500	0.276415	0.276415
2017	Langao County	162530	593565	0.27382	0.27382
2018	Langao County	179804	580189	0.309906	0.309906
2019	Langao County	197078	486901	0.40476	0.40476
2020	Langao County	150436	550004	0.273518	0.273518
2021	Langao County	189776	474200	0.400202	0.400202
2012	Hanyin County	200726	586100	0.342477	0.342477
2013	Hanyin County	208869	684400	0.305186	0.305186
2014	Hanyin County	218373	775000	0.281772	0.281772
2015	Hanyin County	230978	861600	0.26808	0.26808
2016	Hanyin County	254803	951900	0.267678	0.267678
2017	Hanyin County	283381	1076703	0.263193	0.263193
2018	Hanyin County	311959	1125018	0.277292	0.277292
2019	Hanyin County	340537	1001545	0.340012	0.340012
2020	Hanyin County	96428	1109114	0.0869415	0.0869415
2021	Hanyin County	107031	418500	0.255749	0.255749
2012	Shiquan County	110801	477900	0.23185	0.23185
2013	Shiquan County	115214	547600	0.210398	0.210398
2014	Shiquan County	122292	629800	0.194176	0.194176
2015	Shiquan County	126860	714300	0.1776	0.1776
2016	Shiquan County	147740	809600	0.182485	0.182485
2017	Shiquan County	167163	961924	0.17378	0.17378
2018	Shiquan County	186586	941383	0.198204	0.198204
2019	Shiquan County	206009	830204	0.248143	0.248143
2020	Shiquan County	62968	938900	0.0670657	0.0670657
2021	Shiquan County	70647	189300	0.373201	0.373201
2012	Ningshan County	74604	213500	0.349433	0.349433
2013	Ningshan County	77333	222200	0.348033	0.348033
2014	Ningshan County	80355	245200	0.327712	0.327712
2015	Ningshan County	85387	266200	0.320763	0.320763
2016	Ningshan County	94280	301600	0.312599	0.312599
2017	Ningshan County	103156	346916	0.297352	0.297352
2018	Ningshan County	112032	317203	0.353187	0.353187
2019	Ningshan County	120908	231580	0.5221	0.5221
2020	Ningshan County	175284	243400	0.720148	0.720148
2021	Ningshan County	184765	467000	0.395642	0.395642
2012	Ziyang County	193078	543800	0.355053	0.355053
2013	Ziyang County	196564	647900	0.303386	0.303386
2014	Ziyang County	201530	745800	0.27022	0.27022
2015	Ziyang County	209496	804800	0.260308	0.260308
2016	Ziyang County	253083	907700	0.278818	0.278818
2017	Ziyang County	281583	1036503	0.271666	0.271666
2018	Ziyang County	310083	1095914	0.282945	0.282945
2019	Ziyang County	338583	1005299	0.336798	0.336798
2020	Ziyang County	90850	1078442	0.0842419	0.0842419
2021	Ziyang County	212778	843100	0.252376	0.252376
2012	Xunyang City	222456	1000100	0.222434	0.222434
2013	Xunyang City	229561	1123700	0.20429	0.20429
2014	Xunyang City	241290	1240900	0.194448	0.194448
2015	Xunyang City	249653	1378300	0.181131	0.181131
2016	Xunyang City	333308	1598700	0.208487	0.208487
2017	Xunyang City	375542	1879857	0.199772	0.199772
2018	Xunyang City	417776	1870492	0.223351	0.223351
2019	Xunyang City	460010	1734798	0.265166	0.265166
2020	Xunyang City	101752	2007363	0.0506894	0.0506894
2021	Xunyang City	169512	402100	0.421567	0.421567
2012	Pingli County	176836	505000	0.35017	0.35017
2013	Pingli County	183856	605900	0.303443	0.303443
2014	Pingli County	192619	679300	0.283555	0.283555
2015	Pingli County	200479	772900	0.259385	0.259385
2016	Pingli County	201731	875200	0.230497	0.230497
2017	Pingli County	224838	996248	0.225685	0.225685
2018	Pingli County	247945	1038998	0.238639	0.238639
2019	Pingli County	271052	890956	0.304226	0.304226
2020	Pingli County	46773	1040659	0.0449456	0.0449456
2021	Pingli County	52640	120000	0.438667	0.438667
2012	Zhenping County	55179	129500	0.426093	0.426093
2013	Zhenping County	57384	120600	0.475821	0.475821
2014	Zhenping County	59927	135600	0.44194	0.44194
2015	Zhenping County	63301	152600	0.414817	0.414817
2016	Zhenping County	76017	191900	0.396128	0.396128
2017	Zhenping County	84561	230279	0.367211	0.367211
2018	Zhenping County	93105	243411	0.382501	0.382501
2019	Zhenping County	101649	237697	0.427641	0.427641
2020	Zhenping County	190068	261890	0.725755	0.725755
2021	Zhenping County	115437	339100	0.340422	0.340422
2012	Baihe County	120819	415600	0.29071	0.29071
2013	Baihe County	126822	482700	0.262735	0.262735
2014	Baihe County	131233	524300	0.250301	0.250301
2015	Baihe County	136801	595400	0.229763	0.229763
2016	Baihe County	171639	675100	0.254242	0.254242
2017	Baihe County	190115	791735	0.240125	0.240125
2018	Baihe County	208591	798439	0.261249	0.261249
2019	Baihe County	227067	710627	0.31953	0.31953
2020	Baihe County	205123	792362	0.258875	0.258875
2021	Baihe County	230111	986100	0.233355	0.233355
2012	Shangzhou District	243724	1083500	0.224941	0.224941
2013	Shangzhou District	241200	1176500	0.205015	0.205015
2014	Shangzhou District	257463	1229000	0.20949	0.20949
2015	Shangzhou District	262074	1360900	0.192574	0.192574
2016	Shangzhou District	257676	1535100	0.167856	0.167856
2017	Shangzhou District	288665	1535104	0.188043	0.188043
2018	Shangzhou District	319654	1567480	0.203929	0.203929
2019	Shangzhou District	350643	1415900	0.247647	0.247647
2020	Shangzhou District	310000	1515730	0.204522	0.204522
2021	Shangzhou District	344618	706900	0.487506	0.487506
2012	Luonan County	364527	828400	0.440037	0.440037
2013	Luonan County	368882	920600	0.400697	0.400697
2014	Luonan County	389686	991700	0.392947	0.392947
2015	Luonan County	388553	1133900	0.34267	0.34267
2016	Luonan County	376736	1367000	0.275593	0.275593
2017	Luonan County	417801	1406450	0.297061	0.297061
2018	Luonan County	458866	1485570	0.308882	0.308882
2019	Luonan County	499931	1185410	0.421737	0.421737
2020	Luonan County	186654	1379080	0.135347	0.135347
2021	Luonan County	250496	660700	0.379137	0.379137
2012	Shanyang County	282881	807800	0.350187	0.350187
2013	Shanyang County	300646	955100	0.31478	0.31478
2014	Shanyang County	330490	1040500	0.317626	0.317626
2015	Shanyang County	333186	1213000	0.274679	0.274679
2016	Shanyang County	317819	1443500	0.220172	0.220172
2017	Shanyang County	347520	1479530	0.234885	0.234885
2018	Shanyang County	377221	1528780	0.246746	0.246746
2019	Shanyang County	406922	1443240	0.28195	0.28195
2020	Shanyang County	187819	1717490	0.109357	0.109357
2021	Shanyang County	199680	528300	0.377967	0.377967
2012	Danfeng County	207058	622300	0.33273	0.33273
2013	Danfeng County	209831	732000	0.286654	0.286654
2014	Danfeng County	218054	789400	0.276228	0.276228
2015	Danfeng County	222008	866700	0.256153	0.256153
2016	Danfeng County	212013	972300	0.218053	0.218053
2017	Danfeng County	230072	990490	0.232281	0.232281
2018	Danfeng County	248131	980180	0.253148	0.253148
2019	Danfeng County	266190	889430	0.299282	0.299282
2020	Danfeng County	201808	995130	0.202796	0.202796
2021	Danfeng County	217129	473900	0.458175	0.458175
2012	Shangnan County	227986	539200	0.422823	0.422823
2013	Shangnan County	226022	633900	0.356558	0.356558
2014	Shangnan County	238841	689200	0.346548	0.346548
2015	Shangnan County	247066	763100	0.323766	0.323766
2016	Shangnan County	239508	875400	0.273598	0.273598
2017	Shangnan County	255275	879026	0.290407	0.290407
2018	Shangnan County	271042	914150	0.296496	0.296496
2019	Shangnan County	286809	814284	0.352222	0.352222
2020	Shangnan County	210779	940560	0.224099	0.224099
2021	Shangnan County	208394	573700	0.363246	0.363246
2012	Zhen’an County	216494	661900	0.32708	0.32708
2013	Zhen’an County	209866	775000	0.270795	0.270795
2014	Zhen’an County	214784	839100	0.255969	0.255969
2015	Zhen’an County	219282	897900	0.244217	0.244217
2016	Zhen’an County	218244	1060000	0.205891	0.205891
2017	Zhen’an County	239912	1111990	0.21575	0.21575
2018	Zhen’an County	261580	1058650	0.247088	0.247088
2019	Zhen’an County	283248	880640	0.321639	0.321639
2020	Zhen’an County	93320	1002180	0.093117	0.093117
2021	Zhen’an County	109728	510900	0.214774	0.214774
2012	Zhashui County	116521	609500	0.191175	0.191175
2013	Zhashui County	126000	641800	0.196323	0.196323
2014	Zhashui County	131341	661700	0.19849	0.19849
2015	Zhashui County	139276	747900	0.186223	0.186223
2016	Zhashui County	131526	749800	0.175415	0.175415
2017	Zhashui County	151455	745600	0.203132	0.203132
2018	Zhashui County	171384	837300	0.204686	0.204686
2019	Zhashui County	191313	765400	0.249952	0.249952
2020	Zhashui County	191321	972700	0.196691	0.196691
2021	Zhashui County	191345	973210	0.196612	0.196612

## Sheet: basic farmland protection ratio
year	xian	C11（Common cultivated land area）	b23（Total power of agricultural machinery）	Total power of machinery per unit of cultivated land	Total power of machinery per unit of cultivated land	Permanent basic farmland protection ratio(10,000 mu)	Built-up Area of Permanent Basic Farmland (10,000 mu)	Built-up Area of Permanent Basic Farmland (hectare)	Protection Rate of Permanent Basic Farmland	Protection Rate of Permanent Basic Farmland
2012	Baqiao District	10511	18	0.00171249	0.00171249		0.11	73.337	0.00697717	0.00697717
2013	Baqiao District	9840	17.93	0.00182215	0.00182215		0.11	73.337	0.00745295	0.00745295
2014	Baqiao District	9241	15.87	0.00171735	0.00171735		0.11	73.337	0.00793605	0.00793605
2015	Baqiao District	8709	16	0.00183718	0.00183718		0.11	73.337	0.00842083	0.00842083
2016	Baqiao District	5242	14.51	0.00276803	0.00276803		0.11	73.337	0.0139903	0.0139903
2017	Baqiao District	4840	14	0.00289256	0.00289256		0.11	73.337	0.0151523	0.0151523
2018	Baqiao District	4438	13	0.00292925	0.00292925		0.11	73.337	0.0165248	0.0165248
2019	Baqiao District	3715	12	0.00323015	0.00323015		0.11	73.337	0.0197408	0.0197408
2020	Baqiao District	2992	11.75	0.00392714	0.00392714		0.11	73.337	0.024511	0.024511
2021	Baqiao District	2269	11.78	0.00519171	0.00519171		0.11	73.337	0.0323213	0.0323213
2012	Yanliang District	15792	17	0.00107649	0.00107649		8.46	5640.28	0.357161	0.357161
2013	Yanliang District	15696	19	0.0012105	0.0012105		8.46	5640.28	0.359345	0.359345
2014	Yanliang District	15632	19	0.00121546	0.00121546		8.46	5640.28	0.360816	0.360816
2015	Yanliang District	15478	19	0.00122755	0.00122755		8.46	5640.28	0.364406	0.364406
2016	Yanliang District	15457	17	0.00109983	0.00109983		8.46	5640.28	0.364901	0.364901
2017	Yanliang District	15285	16	0.00104678	0.00104678		8.46	5640.28	0.369008	0.369008
2018	Yanliang District	15136	13	0.000858879	0.000858879		8.46	5640.28	0.37264	0.37264
2019	Yanliang District	15178	11	0.000724733	0.000724733		8.46	5640.28	0.371609	0.371609
2020	Yanliang District	15220	9	0.000591327	0.000591327		8.46	5640.28	0.370584	0.370584
2021	Yanliang District	15262	7	0.000458655	0.000458655		8.46	5640.28	0.369564	0.369564
2012	Lintong District	46994	55.3638	0.0011781	0.0011781		23.08	15387.4	0.327434	0.327434
2013	Lintong District	46873	56.8816	0.00121353	0.00121353		23.08	15387.4	0.328279	0.328279
2014	Lintong District	46492	60.8868	0.00130962	0.00130962		23.08	15387.4	0.33097	0.33097
2015	Lintong District	46246	61.2966	0.00132545	0.00132545		23.08	15387.4	0.33273	0.33273
2016	Lintong District	45926	46.6695	0.00101619	0.00101619		23.08	15387.4	0.335048	0.335048
2017	Lintong District	45862	40.8257	0.000890186	0.000890186		23.08	15387.4	0.335516	0.335516
2018	Lintong District	45795	40.4008	0.00088221	0.00088221		23.08	15387.4	0.336007	0.336007
2019	Lintong District	44147	42.2225	0.000956407	0.000956407		23.08	15387.4	0.34855	0.34855
2020	Lintong District	42499	42.3218	0.00099583	0.00099583		23.08	15387.4	0.362066	0.362066
2021	Lintong District	40851	42.4211	0.00103843	0.00103843		23.08	15387.4	0.376672	0.376672
2012	Chang’an District	44219	42	0.000949818	0.000949818		6.92	4613.56	0.104334	0.104334
2013	Chang’an District	43579	44	0.00100966	0.00100966		6.92	4613.56	0.105867	0.105867
2014	Chang’an District	41980	43	0.0010243	0.0010243		6.92	4613.56	0.109899	0.109899
2015	Chang’an District	41428	43	0.00103795	0.00103795		6.92	4613.56	0.111363	0.111363
2016	Chang’an District	39355	44	0.00111803	0.00111803		6.92	4613.56	0.117229	0.117229
2017	Chang’an District	32215	35	0.00108645	0.00108645		6.92	4613.56	0.143212	0.143212
2018	Chang’an District	31229	35	0.00112075	0.00112075		6.92	4613.56	0.147733	0.147733
2019	Chang’an District	31253	36	0.00115189	0.00115189		6.92	4613.56	0.14762	0.14762
2020	Chang’an District	31277	37	0.00118298	0.00118298		6.92	4613.56	0.147507	0.147507
2021	Chang’an District	31301	38	0.00121402	0.00121402		6.92	4613.56	0.147394	0.147394
2012	Lantian County	40400	29	0.000717822	0.000717822		8.65	5766.95	0.142746	0.142746
2013	Lantian County	39879	30	0.000752276	0.000752276		8.65	5766.95	0.144611	0.144611
2014	Lantian County	39733	31	0.000780208	0.000780208		8.65	5766.95	0.145143	0.145143
2015	Lantian County	39680	31	0.00078125	0.00078125		8.65	5766.95	0.145337	0.145337
2016	Lantian County	14993	34	0.00226772	0.00226772		8.65	5766.95	0.384643	0.384643
2017	Lantian County	39248	25	0.000636975	0.000636975		8.65	5766.95	0.146936	0.146936
2018	Lantian County	39125	25	0.000638978	0.000638978		8.65	5766.95	0.147398	0.147398
2019	Lantian County	38997	25	0.000641075	0.000641075		8.65	5766.95	0.147882	0.147882
2020	Lantian County	38869	25	0.000643186	0.000643186		8.65	5766.95	0.148369	0.148369
2021	Lantian County	38741	25	0.000645311	0.000645311		8.65	5766.95	0.148859	0.148859
2012	Zhouzhi County	33257	42	0.00126289	0.00126289		6.56	4373.55	0.131508	0.131508
2013	Zhouzhi County	33263	43	0.00129273	0.00129273		6.56	4373.55	0.131484	0.131484
2014	Zhouzhi County	33269	45	0.00135261	0.00135261		6.56	4373.55	0.13146	0.13146
2015	Zhouzhi County	32957	48	0.00145644	0.00145644		6.56	4373.55	0.132705	0.132705
2016	Zhouzhi County	39473	48	0.00121602	0.00121602		6.56	4373.55	0.110799	0.110799
2017	Zhouzhi County	32840	33	0.00100487	0.00100487		6.56	4373.55	0.133178	0.133178
2018	Zhouzhi County	32723	35	0.00106958	0.00106958		6.56	4373.55	0.133654	0.133654
2019	Zhouzhi County	32625	34	0.00104215	0.00104215		6.56	4373.55	0.134055	0.134055
2020	Zhouzhi County	32527	33	0.00101454	0.00101454		6.56	4373.55	0.134459	0.134459
2021	Zhouzhi County	32429	32	0.000986771	0.000986771		6.56	4373.55	0.134865	0.134865
2012	Gaoling District	15244	26	0.00170559	0.00170559		5.33	3553.51	0.233109	0.233109
2013	Gaoling District	15197	27	0.00177667	0.00177667		5.33	3553.51	0.23383	0.23383
2014	Gaoling District	15126	28	0.00185112	0.00185112		5.33	3553.51	0.234927	0.234927
2015	Gaoling District	15076	29	0.00192359	0.00192359		5.33	3553.51	0.235706	0.235706
2016	Gaoling District	37467	25	0.000667254	0.000667254		5.33	3553.51	0.0948438	0.0948438
2017	Gaoling District	14605	21	0.00143786	0.00143786		5.33	3553.51	0.243308	0.243308
2018	Gaoling District	14807	22	0.00148578	0.00148578		5.33	3553.51	0.239989	0.239989
2019	Gaoling District	14768	23	0.00155742	0.00155742		5.33	3553.51	0.240622	0.240622
2020	Gaoling District	14729	24	0.00162944	0.00162944		5.33	3553.51	0.241259	0.241259
2021	Gaoling District	14690	25	0.00170184	0.00170184		5.33	3553.51	0.2419	0.2419
2012	Huyi District	38160	43	0.00112683	0.00112683		11.62	7747.05	0.203015	0.203015
2013	Huyi District	38003	46	0.00121043	0.00121043		11.62	7747.05	0.203854	0.203854
2014	Huyi District	37535	50	0.00133209	0.00133209		11.62	7747.05	0.206395	0.206395
2015	Huyi District	37521	50	0.00133259	0.00133259		11.62	7747.05	0.206472	0.206472
2016	Huyi District	32881	21	0.000638667	0.000638667		11.62	7747.05	0.235609	0.235609
2017	Huyi District	35244	49	0.00139031	0.00139031		11.62	7747.05	0.219812	0.219812
2018	Huyi District	33685	50	0.00148434	0.00148434		11.62	7747.05	0.229985	0.229985
2019	Huyi District	33647	50	0.00148602	0.00148602		11.62	7747.05	0.230245	0.230245
2020	Huyi District	33609	50	0.0014877	0.0014877		11.62	7747.05	0.230505	0.230505
2021	Huyi District	33571	50	0.00148938	0.00148938		11.62	7747.05	0.230766	0.230766
2012	Chencang District	45170	35	0.000774851	0.000774851		18.67	12447.3	0.275565	0.275565
2013	Chencang District	45084	37	0.00082069	0.00082069		18.67	12447.3	0.276091	0.276091
2014	Chencang District	44968	41	0.000911759	0.000911759		18.67	12447.3	0.276803	0.276803
2015	Chencang District	44983	43	0.000955917	0.000955917		18.67	12447.3	0.276711	0.276711
2016	Chencang District	44600	38	0.000852018	0.000852018		18.67	12447.3	0.279087	0.279087
2017	Chencang District	44450	39	0.00087739	0.00087739		18.67	12447.3	0.280029	0.280029
2018	Chencang District	44321	41	0.000925069	0.000925069		18.67	12447.3	0.280844	0.280844
2019	Chencang District	43576	41	0.000940885	0.000940885		18.67	12447.3	0.285646	0.285646
2020	Chencang District	42831	41	0.000957251	0.000957251		18.67	12447.3	0.290614	0.290614
2021	Chencang District	42086	41	0.000974196	0.000974196		18.67	12447.3	0.295758	0.295758
2012	Mei County	23157	19	0.000820486	0.000820486		4.66	3106.82	0.134163	0.134163
2013	Mei County	23188	20	0.000862515	0.000862515		4.66	3106.82	0.133984	0.133984
2014	Mei County	23161	22	0.000949873	0.000949873		4.66	3106.82	0.13414	0.13414
2015	Mei County	23236	23	0.000989843	0.000989843		4.66	3106.82	0.133707	0.133707
2016	Mei County	23175	22	0.000949299	0.000949299		4.66	3106.82	0.134059	0.134059
2017	Mei County	23173	24	0.00103569	0.00103569		4.66	3106.82	0.134071	0.134071
2018	Mei County	23171	25	0.00107893	0.00107893		4.66	3106.82	0.134082	0.134082
2019	Mei County	23121	42	0.00181653	0.00181653		4.66	3106.82	0.134372	0.134372
2020	Mei County	23071	59	0.00255732	0.00255732		4.66	3106.82	0.134664	0.134664
2021	Mei County	23021	76	0.00330133	0.00330133		4.66	3106.82	0.134956	0.134956
2012	Fufeng County	33199	40	0.00120486	0.00120486		29.6	19734.3	0.594425	0.594425
2013	Fufeng County	32715	42	0.00128381	0.00128381		29.6	19734.3	0.603219	0.603219
2014	Fufeng County	32395	43	0.00132737	0.00132737		29.6	19734.3	0.609178	0.609178
2015	Fufeng County	31802	44	0.00138356	0.00138356		29.6	19734.3	0.620537	0.620537
2016	Fufeng County	31177	36	0.0011547	0.0011547		29.6	19734.3	0.632977	0.632977
2017	Fufeng County	30838	42	0.00136196	0.00136196		29.6	19734.3	0.639935	0.639935
2018	Fufeng County	30611	44	0.00143739	0.00143739		29.6	19734.3	0.644681	0.644681
2019	Fufeng County	30548	35	0.00114574	0.00114574		29.6	19734.3	0.64601	0.64601
2020	Fufeng County	30485	26	0.000852878	0.000852878		29.6	19734.3	0.647345	0.647345
2021	Fufeng County	30422	17	0.000558806	0.000558806		29.6	19734.3	0.648686	0.648686
2012	Fengxiang District	46181	38	0.000822849	0.000822849		33.11	22074.4	0.477998	0.477998
2013	Fengxiang District	46335	41	0.00088486	0.00088486		33.11	22074.4	0.47641	0.47641
2014	Fengxiang District	46332	43	0.000928084	0.000928084		33.11	22074.4	0.47644	0.47644
2015	Fengxiang District	45813	44	0.000960426	0.000960426		33.11	22074.4	0.481838	0.481838
2016	Fengxiang District	45724	36	0.000787333	0.000787333		33.11	22074.4	0.482776	0.482776
2017	Fengxiang District	45587	37	0.000811635	0.000811635		33.11	22074.4	0.484227	0.484227
2018	Fengxiang District	45903	37	0.000806048	0.000806048		33.11	22074.4	0.480893	0.480893
2019	Fengxiang District	45659	30	0.000657045	0.000657045		33.11	22074.4	0.483463	0.483463
2020	Fengxiang District	45415	25	0.000550479	0.000550479		33.11	22074.4	0.48606	0.48606
2021	Fengxiang District	45171	16	0.00035421	0.00035421		33.11	22074.4	0.488686	0.488686
2012	Qishan County	35237	24	0.000681102	0.000681102		23.23	15487.4	0.439522	0.439522
2013	Qishan County	35234	26	0.000737924	0.000737924		23.23	15487.4	0.43956	0.43956
2014	Qishan County	35237	38	0.00107841	0.00107841		23.23	15487.4	0.439522	0.439522
2015	Qishan County	35237	37	0.00105003	0.00105003		23.23	15487.4	0.439522	0.439522
2016	Qishan County	35248	31	0.000879483	0.000879483		23.23	15487.4	0.439385	0.439385
2017	Qishan County	35289	34	0.000963473	0.000963473		23.23	15487.4	0.438874	0.438874
2018	Qishan County	35286	34	0.000963555	0.000963555		23.23	15487.4	0.438912	0.438912
2019	Qishan County	35284	38	0.00107698	0.00107698		23.23	15487.4	0.438937	0.438937
2020	Qishan County	35283	42	0.00119037	0.00119037		23.23	15487.4	0.438949	0.438949
2021	Qishan County	35282	46	0.00130378	0.00130378		23.23	15487.4	0.438962	0.438962
2012	Long County	35281	15	0.000425158	0.000425158		13.48	8987.12	0.25473	0.25473
2013	Long County	35436	16	0.000451518	0.000451518		13.48	8987.12	0.253615	0.253615
2014	Long County	35479	17	0.000479157	0.000479157		13.48	8987.12	0.253308	0.253308
2015	Long County	35442	18	0.000507872	0.000507872		13.48	8987.12	0.253572	0.253572
2016	Long County	35413	15	0.000423573	0.000423573		13.48	8987.12	0.25378	0.25378
2017	Long County	35368	18	0.000508935	0.000508935		13.48	8987.12	0.254103	0.254103
2018	Long County	35360	18	0.00050905	0.00050905		13.48	8987.12	0.254161	0.254161
2019	Long County	35341	25	0.000707394	0.000707394		13.48	8987.12	0.254297	0.254297
2020	Long County	35322	32	0.000905951	0.000905951		13.48	8987.12	0.254434	0.254434
2021	Long County	35303	39	0.00110472	0.00110472		13.48	8987.12	0.254571	0.254571
2012	Qianyang County	35284	12	0.000340097	0.000340097		11.79	7860.39	0.222775	0.222775
2013	Qianyang County	18574	14	0.000753742	0.000753742		11.79	7860.39	0.423193	0.423193
2014	Qianyang County	18567	14	0.000754026	0.000754026		11.79	7860.39	0.423353	0.423353
2015	Qianyang County	18552	15	0.000808538	0.000808538		11.79	7860.39	0.423695	0.423695
2016	Qianyang County	18599	11	0.00059143	0.00059143		11.79	7860.39	0.422624	0.422624
2017	Qianyang County	18677	12	0.000642501	0.000642501		11.79	7860.39	0.42086	0.42086
2018	Qianyang County	18637	12	0.00064388	0.00064388		11.79	7860.39	0.421763	0.421763
2019	Qianyang County	18584	19	0.00102238	0.00102238		11.79	7860.39	0.422966	0.422966
2020	Qianyang County	18186	26	0.00142967	0.00142967		11.79	7860.39	0.432222	0.432222
2021	Qianyang County	17788	33	0.00185518	0.00185518		11.79	7860.39	0.441893	0.441893
2012	Weibin District	17390	8	0.000460035	0.000460035		2.05	1366.73	0.0785932	0.0785932
2013	Weibin District	6504	8	0.00123001	0.00123001		2.05	1366.73	0.210138	0.210138
2014	Weibin District	6389	8	0.00125215	0.00125215		2.05	1366.73	0.21392	0.21392
2015	Weibin District	5969	7	0.00117273	0.00117273		2.05	1366.73	0.228972	0.228972
2016	Weibin District	5934	6	0.00101112	0.00101112		2.05	1366.73	0.230323	0.230323
2017	Weibin District	5565	6	0.00107817	0.00107817		2.05	1366.73	0.245595	0.245595
2018	Weibin District	5427	6	0.00110558	0.00110558		2.05	1366.73	0.25184	0.25184
2019	Weibin District	5104	6	0.00117555	0.00117555		2.05	1366.73	0.267777	0.267777
2020	Weibin District	5080	6	0.0011811	0.0011811		2.05	1366.73	0.269042	0.269042
2021	Weibin District	5056	6	0.00118671	0.00118671		2.05	1366.73	0.270319	0.270319
2012	Jintai District	5032	13	0.00258347	0.00258347		3.02	2013.43	0.400126	0.400126
2013	Jintai District	10748	14	0.00130257	0.00130257		3.02	2013.43	0.187331	0.187331
2014	Jintai District	10613	14	0.00131914	0.00131914		3.02	2013.43	0.189714	0.189714
2015	Jintai District	10176	14	0.00137579	0.00137579		3.02	2013.43	0.197861	0.197861
2016	Jintai District	10122	12	0.00118554	0.00118554		3.02	2013.43	0.198917	0.198917
2017	Jintai District	10199	13	0.00127463	0.00127463		3.02	2013.43	0.197415	0.197415
2018	Jintai District	10127	13	0.0012837	0.0012837		3.02	2013.43	0.198818	0.198818
2019	Jintai District	10065	13	0.0012916	0.0012916		3.02	2013.43	0.200043	0.200043
2020	Jintai District	9903	13	0.00131273	0.00131273		3.02	2013.43	0.203316	0.203316
2021	Jintai District	9741	13	0.00133457	0.00133457		3.02	2013.43	0.206697	0.206697
2012	Jingyang County	9579	40	0.0041758	0.0041758		26.88	17920.9	1.87085	1.87085
2013	Jingyang County	44397	46	0.00103611	0.00103611		26.88	17920.9	0.403651	0.403651
2014	Jingyang County	43757	47	0.00107411	0.00107411		26.88	17920.9	0.409555	0.409555
2015	Jingyang County	43100	49	0.00113689	0.00113689		26.88	17920.9	0.415798	0.415798
2016	Jingyang County	42459	36	0.000847877	0.000847877		26.88	17920.9	0.422075	0.422075
2017	Jingyang County	41995	39	0.000928682	0.000928682		26.88	17920.9	0.426739	0.426739
2018	Jingyang County	30607	37	0.00120887	0.00120887		26.88	17920.9	0.585516	0.585516
2019	Jingyang County	30807	38	0.00123349	0.00123349		26.88	17920.9	0.581715	0.581715
2020	Jingyang County	30807	39	0.00126595	0.00126595		26.88	17920.9	0.581715	0.581715
2021	Jingyang County	30807	40	0.00129841	0.00129841		26.88	17920.9	0.581715	0.581715
2012	Sanyuan County	30807	24	0.000779044	0.000779044		32.75	21834.4	0.708749	0.708749
2013	Sanyuan County	33208	28	0.00084317	0.00084317		32.75	21834.4	0.657505	0.657505
2014	Sanyuan County	33129	29	0.000875366	0.000875366		32.75	21834.4	0.659073	0.659073
2015	Sanyuan County	33055	31	0.000937831	0.000937831		32.75	21834.4	0.660548	0.660548
2016	Sanyuan County	32980	23	0.000697392	0.000697392		32.75	21834.4	0.66205	0.66205
2017	Sanyuan County	32902	25	0.000759832	0.000759832		32.75	21834.4	0.66362	0.66362
2018	Sanyuan County	32836	25	0.000761359	0.000761359		32.75	21834.4	0.664954	0.664954
2019	Sanyuan County	32751	25	0.000763335	0.000763335		32.75	21834.4	0.66668	0.66668
2020	Sanyuan County	32730	25	0.000763825	0.000763825		32.75	21834.4	0.667107	0.667107
2021	Sanyuan County	32709	25	0.000764316	0.000764316		32.75	21834.4	0.667536	0.667536
2012	Liquan County	32688	32	0.000978953	0.000978953		4.85	3233.49	0.0989199	0.0989199
2013	Liquan County	30850	38	0.00123177	0.00123177		4.85	3233.49	0.104813	0.104813
2014	Liquan County	30033	39	0.00129857	0.00129857		4.85	3233.49	0.107665	0.107665
2015	Liquan County	28865	40	0.00138576	0.00138576		4.85	3233.49	0.112021	0.112021
2016	Liquan County	28876	19	0.000657986	0.000657986		4.85	3233.49	0.111979	0.111979
2017	Liquan County	28874	20	0.000692665	0.000692665		4.85	3233.49	0.111986	0.111986
2018	Liquan County	28866	21	0.000727499	0.000727499		4.85	3233.49	0.112017	0.112017
2019	Liquan County	28841	21	0.00072813	0.00072813		4.85	3233.49	0.112115	0.112115
2020	Liquan County	28823	21	0.000728585	0.000728585		4.85	3233.49	0.112185	0.112185
2021	Liquan County	28805	21	0.00072904	0.00072904		4.85	3233.49	0.112255	0.112255
2012	Qindu District	28787	20	0.000694758	0.000694758		1	666.7	0.0231598	0.0231598
2013	Qindu District	10335	22	0.00212869	0.00212869		1	666.7	0.064509	0.064509
2014	Qindu District	9962	23	0.00230877	0.00230877		1	666.7	0.0669243	0.0669243
2015	Qindu District	8891	24	0.00269936	0.00269936		1	666.7	0.0749859	0.0749859
2016	Qindu District	8524	19	0.002229	0.002229		1	666.7	0.0782145	0.0782145
2017	Qindu District	8524	19	0.002229	0.002229		1	666.7	0.0782145	0.0782145
2018	Qindu District	3573	11	0.00307865	0.00307865		1	666.7	0.186594	0.186594
2019	Qindu District	3611	11	0.00304625	0.00304625		1	666.7	0.18463	0.18463
2020	Qindu District	3555	11	0.00309423	0.00309423		1	666.7	0.187539	0.187539
2021	Qindu District	3499	11	0.00314376	0.00314376		1	666.7	0.19054	0.19054
2012	Weicheng District	3443	19	0.00551844	0.00551844		0	0	0	0
2013	Weicheng District	13124	22	0.00167632	0.00167632		0	0	0	0
2014	Weicheng District	12660	23	0.00181675	0.00181675		0	0	0	0
2015	Weicheng District	12421	24	0.00193221	0.00193221		0	0	0	0
2016	Weicheng District	12100	14	0.00115702	0.00115702		0	0	0	0
2017	Weicheng District	11964	14	0.00117018	0.00117018		0	0	0	0
2018	Weicheng District	11828	14	0.00118363	0.00118363		0	0	0	0
2019	Weicheng District	11692	14	0.0011974	0.0011974		0	0	0	0
2020	Weicheng District	11556	14	0.00121149	0.00121149		0	0	0	0
2021	Weicheng District	11420	14	0.00122592	0.00122592		0	0	0	0
2012	Qian County	11284	32	0.00283587	0.00283587		31.73	21154.4	1.87472	1.87472
2013	Qian County	51258	37	0.000721839	0.000721839		31.73	21154.4	0.412704	0.412704
2014	Qian County	49915	38	0.000761294	0.000761294		31.73	21154.4	0.423808	0.423808
2015	Qian County	48443	39	0.00080507	0.00080507		31.73	21154.4	0.436686	0.436686
2016	Qian County	46630	29	0.000621917	0.000621917		31.73	21154.4	0.453665	0.453665
2017	Qian County	46642	29	0.000621757	0.000621757		31.73	21154.4	0.453548	0.453548
2018	Qian County	46959	29	0.00061756	0.00061756		31.73	21154.4	0.450486	0.450486
2019	Qian County	46917	30	0.000639427	0.000639427		31.73	21154.4	0.45089	0.45089
2020	Qian County	47064	31	0.000658678	0.000658678		31.73	21154.4	0.449481	0.449481
2021	Qian County	47211	32	0.000677808	0.000677808		31.73	21154.4	0.448082	0.448082
2012	Wugong County	47358	24	0.000506778	0.000506778		19.21	12807.3	0.270436	0.270436
2013	Wugong County	26528	30	0.00113088	0.00113088		19.21	12807.3	0.482784	0.482784
2014	Wugong County	26767	32	0.0011955	0.0011955		19.21	12807.3	0.478474	0.478474
2015	Wugong County	26906	34	0.00126366	0.00126366		19.21	12807.3	0.476002	0.476002
2016	Wugong County	26937	26	0.000965215	0.000965215		19.21	12807.3	0.475454	0.475454
2017	Wugong County	26955	27	0.00100167	0.00100167		19.21	12807.3	0.475137	0.475137
2018	Wugong County	26967	28	0.00103831	0.00103831		19.21	12807.3	0.474925	0.474925
2019	Wugong County	26978	16	0.000593076	0.000593076		19.21	12807.3	0.474732	0.474732
2020	Wugong County	27590	4	0.00014498	0.00014498		19.21	12807.3	0.464201	0.464201
2021	Wugong County	28202	4	0.000141834	0.000141834		19.21	12807.3	0.454128	0.454128
2012	Xingping City	28814	28	0.00097175	0.00097175		22.45	14967.4	0.519449	0.519449
2013	Xingping City	35810	31	0.00086568	0.00086568		22.45	14967.4	0.417967	0.417967
2014	Xingping City	34875	32	0.000917563	0.000917563		22.45	14967.4	0.429173	0.429173
2015	Xingping City	33924	33	0.000972763	0.000972763		22.45	14967.4	0.441204	0.441204
2016	Xingping City	32687	23	0.000703644	0.000703644		22.45	14967.4	0.457901	0.457901
2017	Xingping City	31490	23	0.000730391	0.000730391		22.45	14967.4	0.475307	0.475307
2018	Xingping City	28145	20	0.000710606	0.000710606		22.45	14967.4	0.531797	0.531797
2019	Xingping City	28031	30	0.00107024	0.00107024		22.45	14967.4	0.533959	0.533959
2020	Xingping City	27957	40	0.00143077	0.00143077		22.45	14967.4	0.535373	0.535373
2021	Xingping City	27883	50	0.00179321	0.00179321		22.45	14967.4	0.536794	0.536794
2012	Tongguan County	27809	9	0.000323636	0.000323636		4.25	2833.47	0.101891	0.101891
2013	Tongguan County	10654	10	0.000938615	0.000938615		4.25	2833.47	0.265954	0.265954
2014	Tongguan County	10720	10	0.000932836	0.000932836		4.25	2833.47	0.264317	0.264317
2015	Tongguan County	10661	11	0.0010318	0.0010318		4.25	2833.47	0.265779	0.265779
2016	Tongguan County	10593	10	0.00094402	0.00094402		4.25	2833.47	0.267486	0.267486
2017	Tongguan County	10660	13	0.00121951	0.00121951		4.25	2833.47	0.265804	0.265804
2018	Tongguan County	10703	13	0.00121461	0.00121461		4.25	2833.47	0.264737	0.264737
2019	Tongguan County	10720	8	0.000746269	0.000746269		4.25	2833.47	0.264317	0.264317
2020	Tongguan County	10710	3	0.000280112	0.000280112		4.25	2833.47	0.264563	0.264563
2021	Tongguan County	10700	4	0.000373832	0.000373832		4.25	2833.47	0.264811	0.264811
2012	Huazhou District	10690	27	0.00252572	0.00252572		11.42	7613.71	0.712228	0.712228
2013	Huazhou District	23958	30	0.00125219	0.00125219		11.42	7613.71	0.317794	0.317794
2014	Huazhou District	23922	33	0.00137948	0.00137948		11.42	7613.71	0.318272	0.318272
2015	Huazhou District	23922	35	0.00146309	0.00146309		11.42	7613.71	0.318272	0.318272
2016	Huazhou District	23952	33	0.00137776	0.00137776		11.42	7613.71	0.317874	0.317874
2017	Huazhou District	23746	30	0.00126337	0.00126337		11.42	7613.71	0.320631	0.320631
2018	Huazhou District	23632	31	0.00131178	0.00131178		11.42	7613.71	0.322178	0.322178
2019	Huazhou District	23590	31	0.00131412	0.00131412		11.42	7613.71	0.322752	0.322752
2020	Huazhou District	23608	31	0.00131311	0.00131311		11.42	7613.71	0.322506	0.322506
2021	Huazhou District	23626	31	0.00131211	0.00131211		11.42	7613.71	0.32226	0.32226
2012	Huayin City	23644	6	0.000253764	0.000253764		9.5	6333.65	0.267876	0.267876
2013	Huayin City	12758	6	0.000470293	0.000470293		9.5	6333.65	0.496445	0.496445
2014	Huayin City	12727	7	0.000550012	0.000550012		9.5	6333.65	0.497655	0.497655
2015	Huayin City	12703	7	0.000551051	0.000551051		9.5	6333.65	0.498595	0.498595
2016	Huayin City	12580	7	0.000556439	0.000556439		9.5	6333.65	0.50347	0.50347
2017	Huayin City	12557	8	0.000637095	0.000637095		9.5	6333.65	0.504392	0.504392
2018	Huayin City	12567	9	0.000716161	0.000716161		9.5	6333.65	0.503991	0.503991
2019	Huayin City	12569	9	0.000716047	0.000716047		9.5	6333.65	0.50391	0.50391
2020	Huayin City	12567	9	0.000716161	0.000716161		9.5	6333.65	0.503991	0.503991
2021	Huayin City	12565	9	0.000716275	0.000716275		9.5	6333.65	0.504071	0.504071
2012	Linwei District	12563	76	0.00604951	0.00604951		44.11	29408.1	2.34085	2.34085
2013	Linwei District	69495	75	0.00107921	0.00107921		44.11	29408.1	0.423169	0.423169
2014	Linwei District	69522	81	0.0011651	0.0011651		44.11	29408.1	0.423005	0.423005
2015	Linwei District	65963	95	0.0014402	0.0014402		44.11	29408.1	0.445828	0.445828
2016	Linwei District	65683	88	0.00133977	0.00133977		44.11	29408.1	0.447728	0.447728
2017	Linwei District	63547	101	0.00158937	0.00158937		44.11	29408.1	0.462778	0.462778
2018	Linwei District	61591	114	0.00185092	0.00185092		44.11	29408.1	0.477475	0.477475
2019	Linwei District	59444	91	0.00153085	0.00153085		44.11	29408.1	0.49472	0.49472
2020	Linwei District	52668	68	0.00129111	0.00129111		44.11	29408.1	0.558368	0.558368
2021	Linwei District	45892	45	0.000980563	0.000980563		44.11	29408.1	0.640812	0.640812
2012	Dali County	39116	89	0.00227528	0.00227528		35.29	23527.8	0.601489	0.601489
2013	Dali County	76399	101	0.00132201	0.00132201		35.29	23527.8	0.30796	0.30796
2014	Dali County	75705	103	0.00136054	0.00136054		35.29	23527.8	0.310783	0.310783
2015	Dali County	74380	110	0.00147889	0.00147889		35.29	23527.8	0.316319	0.316319
2016	Dali County	74031	103	0.00139131	0.00139131		35.29	23527.8	0.317811	0.317811
2017	Dali County	70692	114	0.00161263	0.00161263		35.29	23527.8	0.332822	0.332822
2018	Dali County	67571	120	0.00177591	0.00177591		35.29	23527.8	0.348194	0.348194
2019	Dali County	66876	116	0.00173455	0.00173455		35.29	23527.8	0.351813	0.351813
2020	Dali County	64259	112	0.00174295	0.00174295		35.29	23527.8	0.366141	0.366141
2021	Dali County	61642	108	0.00175205	0.00175205		35.29	23527.8	0.381685	0.381685
2012	Pucheng County	59025	63	0.00106734	0.00106734		38.5	25668	0.434866	0.434866
2013	Pucheng County	97855	66	0.000674467	0.000674467		38.5	25668	0.262306	0.262306
2014	Pucheng County	94933	94	0.000990172	0.000990172		38.5	25668	0.27038	0.27038
2015	Pucheng County	93352	96	0.00102837	0.00102837		38.5	25668	0.274959	0.274959
2016	Pucheng County	91033	94	0.00103259	0.00103259		38.5	25668	0.281963	0.281963
2017	Pucheng County	88093	100	0.00113516	0.00113516		38.5	25668	0.291373	0.291373
2018	Pucheng County	88571	102	0.00115162	0.00115162		38.5	25668	0.289801	0.289801
2019	Pucheng County	88906	37	0.00041617	0.00041617		38.5	25668	0.288709	0.288709
2020	Pucheng County	88717	28	0.00031561	0.00031561		38.5	25668	0.289324	0.289324
2021	Pucheng County	88528	93	0.00105052	0.00105052		38.5	25668	0.289942	0.289942
2012	Fuping County	88339	53	0.000599962	0.000599962		42.02	28014.7	0.317128	0.317128
2013	Fuping County	70987	58	0.000817051	0.000817051		42.02	28014.7	0.394646	0.394646
2014	Fuping County	71002	61	0.000859131	0.000859131		42.02	28014.7	0.394563	0.394563
2015	Fuping County	70814	73	0.00103087	0.00103087		42.02	28014.7	0.39561	0.39561
2016	Fuping County	70171	61	0.000869305	0.000869305		42.02	28014.7	0.399235	0.399235
2017	Fuping County	68101	62	0.000910412	0.000910412		42.02	28014.7	0.41137	0.41137
2018	Fuping County	66601	66	0.000990976	0.000990976		42.02	28014.7	0.420635	0.420635
2019	Fuping County	66597	78	0.00117122	0.00117122		42.02	28014.7	0.420661	0.420661
2020	Fuping County	66330	90	0.00135685	0.00135685		42.02	28014.7	0.422354	0.422354
2021	Fuping County	66063	102	0.00154398	0.00154398		42.02	28014.7	0.424061	0.424061
2012	Shenmu City	65796	29	0.000440756	0.000440756		15.26	10173.8	0.154627	0.154627
2013	Shenmu City	45155	29	0.000642232	0.000642232		15.26	10173.8	0.225309	0.225309
2014	Shenmu City	48474	40	0.000825185	0.000825185		15.26	10173.8	0.209882	0.209882
2015	Shenmu City	81855	41	0.000500886	0.000500886		15.26	10173.8	0.124291	0.124291
2016	Shenmu City	81990	24	0.000292719	0.000292719		15.26	10173.8	0.124086	0.124086
2017	Shenmu City	82142	26	0.000316525	0.000316525		15.26	10173.8	0.123857	0.123857
2018	Shenmu City	82279	10	0.000121538	0.000121538		15.26	10173.8	0.123651	0.123651
2019	Shenmu City	82850	28	0.00033796	0.00033796		15.26	10173.8	0.122798	0.122798
2020	Shenmu City	83421	46	0.00055142	0.00055142		15.26	10173.8	0.121958	0.121958
2021	Shenmu City	83992	35	0.000416706	0.000416706		15.26	10173.8	0.121129	0.121129
2012	Yuyang District	43255	38	0.000878511	0.000878511		41.19	27461.4	0.634872	0.634872
2013	Yuyang District	53168	43	0.000808757	0.000808757		41.19	27461.4	0.516502	0.516502
2014	Yuyang District	63415	48	0.000756919	0.000756919		41.19	27461.4	0.433042	0.433042
2015	Yuyang District	65069	49	0.000753047	0.000753047		41.19	27461.4	0.422035	0.422035
2016	Yuyang District	63710	37	0.000580757	0.000580757		41.19	27461.4	0.431037	0.431037
2017	Yuyang District	77227	39	0.000505005	0.000505005		41.19	27461.4	0.355593	0.355593
2018	Yuyang District	82310	42	0.000510266	0.000510266		41.19	27461.4	0.333633	0.333633
2019	Yuyang District	82747	43	0.000519656	0.000519656		41.19	27461.4	0.331872	0.331872
2020	Yuyang District	84976	44	0.000517793	0.000517793		41.19	27461.4	0.323166	0.323166
2021	Yuyang District	87205	45	0.000516025	0.000516025		41.19	27461.4	0.314906	0.314906
2012	Hengshan District	89434	24	0.000268354	0.000268354		21.59	14394.1	0.160946	0.160946
2013	Hengshan District	59573	25	0.000419653	0.000419653		21.59	14394.1	0.24162	0.24162
2014	Hengshan District	60855	28	0.00046011	0.00046011		21.59	14394.1	0.23653	0.23653
2015	Hengshan District	60619	29	0.000478398	0.000478398		21.59	14394.1	0.237451	0.237451
2016	Hengshan District	60623	17	0.000280422	0.000280422		21.59	14394.1	0.237436	0.237436
2017	Hengshan District	65408	19	0.000290484	0.000290484		21.59	14394.1	0.220066	0.220066
2018	Hengshan District	81393	27	0.000331724	0.000331724		21.59	14394.1	0.176846	0.176846
2019	Hengshan District	81315	22	0.000270553	0.000270553		21.59	14394.1	0.177016	0.177016
2020	Hengshan District	81384	17	0.000208886	0.000208886		21.59	14394.1	0.176866	0.176866
2021	Hengshan District	81453	12	0.000147324	0.000147324		21.59	14394.1	0.176716	0.176716
2012	Jingbian County	81522	45	0.000551998	0.000551998		27.73	18487.6	0.22678	0.22678
2013	Jingbian County	80154	47	0.000586371	0.000586371		27.73	18487.6	0.230651	0.230651
2014	Jingbian County	80154	55	0.000686179	0.000686179		27.73	18487.6	0.230651	0.230651
2015	Jingbian County	85194	58	0.000680799	0.000680799		27.73	18487.6	0.217006	0.217006
2016	Jingbian County	85751	45	0.000524775	0.000524775		27.73	18487.6	0.215596	0.215596
2017	Jingbian County	85785	47	0.000547881	0.000547881		27.73	18487.6	0.215511	0.215511
2018	Jingbian County	85800	21	0.000244755	0.000244755		27.73	18487.6	0.215473	0.215473
2019	Jingbian County	85834	54	0.000629121	0.000629121		27.73	18487.6	0.215388	0.215388
2020	Jingbian County	85868	87	0.00101318	0.00101318		27.73	18487.6	0.215302	0.215302
2021	Jingbian County	85902	44	0.000512212	0.000512212		27.73	18487.6	0.215217	0.215217
2012	Dingbian County	134162	50	0.000372684	0.000372684		32.03	21354.4	0.159169	0.159169
2013	Dingbian County	136878	56	0.000409123	0.000409123		32.03	21354.4	0.15601	0.15601
2014	Dingbian County	138925	61	0.000439086	0.000439086		32.03	21354.4	0.153712	0.153712
2015	Dingbian County	152968	63	0.000411851	0.000411851		32.03	21354.4	0.1396	0.1396
2016	Dingbian County	161502	46	0.000284826	0.000284826		32.03	21354.4	0.132224	0.132224
2017	Dingbian County	212526	53	0.000249381	0.000249381		32.03	21354.4	0.100479	0.100479
2018	Dingbian County	213526	50	0.000234164	0.000234164		32.03	21354.4	0.100008	0.100008
2019	Dingbian County	213526	60	0.000280996	0.000280996		32.03	21354.4	0.100008	0.100008
2020	Dingbian County	213526	70	0.000327829	0.000327829		32.03	21354.4	0.100008	0.100008
2021	Dingbian County	213526	14	6.55658e-05	6.55658e-05		32.03	21354.4	0.100008	0.100008
2012	Fugu County	41557	32	0.000770027	0.000770027		7.07	4713.57	0.113424	0.113424
2013	Fugu County	43260	32	0.000739713	0.000739713		7.07	4713.57	0.108959	0.108959
2014	Fugu County	43263	32	0.000739662	0.000739662		7.07	4713.57	0.108952	0.108952
2015	Fugu County	43263	34	0.000785891	0.000785891		7.07	4713.57	0.108952	0.108952
2016	Fugu County	43263	23	0.000531632	0.000531632		7.07	4713.57	0.108952	0.108952
2017	Fugu County	43263	23	0.000531632	0.000531632		7.07	4713.57	0.108952	0.108952
2018	Fugu County	43263	24	0.000554747	0.000554747		7.07	4713.57	0.108952	0.108952
2019	Fugu County	43263	24	0.000554747	0.000554747		7.07	4713.57	0.108952	0.108952
2020	Fugu County	43263	24	0.000554747	0.000554747		7.07	4713.57	0.108952	0.108952
2021	Fugu County	43263	24	0.000554747	0.000554747		7.07	4713.57	0.108952	0.108952
2012	Jia County	43263	11	0.000254259	0.000254259		8.3	5533.61	0.127906	0.127906
2013	Jia County	30838	12	0.00038913	0.00038913		8.3	5533.61	0.179441	0.179441
2014	Jia County	30844	14	0.000453897	0.000453897		8.3	5533.61	0.179406	0.179406
2015	Jia County	30844	16	0.000518739	0.000518739		8.3	5533.61	0.179406	0.179406
2016	Jia County	33590	12	0.000357249	0.000357249		8.3	5533.61	0.16474	0.16474
2017	Jia County	58808	13	0.000221058	0.000221058		8.3	5533.61	0.0940962	0.0940962
2018	Jia County	53404	15	0.000280878	0.000280878		8.3	5533.61	0.103618	0.103618
2019	Jia County	53405	15	0.000280873	0.000280873		8.3	5533.61	0.103616	0.103616
2020	Jia County	53406	15	0.000280867	0.000280867		8.3	5533.61	0.103614	0.103614
2021	Jia County	53407	7	0.000131069	0.000131069		8.3	5533.61	0.103612	0.103612
2012	Wubu County	8120	7	0.000862069	0.000862069		1.34	893.378	0.110022	0.110022
2013	Wubu County	8113	7	0.000862813	0.000862813		1.34	893.378	0.110117	0.110117
2014	Wubu County	8101	7	0.000864091	0.000864091		1.34	893.378	0.11028	0.11028
2015	Wubu County	8098	8	0.000987898	0.000987898		1.34	893.378	0.110321	0.110321
2016	Wubu County	8092	4	0.000494315	0.000494315		1.34	893.378	0.110403	0.110403
2017	Wubu County	8089	4	0.000494499	0.000494499		1.34	893.378	0.110444	0.110444
2018	Wubu County	8077	13	0.00160951	0.00160951		1.34	893.378	0.110608	0.110608
2019	Wubu County	8069	5	0.000619655	0.000619655		1.34	893.378	0.110717	0.110717
2020	Wubu County	8061	6	0.000744325	0.000744325		1.34	893.378	0.110827	0.110827
2021	Wubu County	8053	12	0.00149013	0.00149013		1.34	893.378	0.110937	0.110937
2012	Mizhi County	26647	14	0.000525387	0.000525387		5.15	3433.51	0.128851	0.128851
2013	Mizhi County	27859	17	0.000610216	0.000610216		5.15	3433.51	0.123246	0.123246
2014	Mizhi County	27865	18	0.000645972	0.000645972		5.15	3433.51	0.123219	0.123219
2015	Mizhi County	27865	18	0.000645972	0.000645972		5.15	3433.51	0.123219	0.123219
2016	Mizhi County	27866	14	0.000502404	0.000502404		5.15	3433.51	0.123215	0.123215
2017	Mizhi County	27870	15	0.000538213	0.000538213		5.15	3433.51	0.123197	0.123197
2018	Mizhi County	27870	17	0.000609975	0.000609975		5.15	3433.51	0.123197	0.123197
2019	Mizhi County	27870	15	0.000538213	0.000538213		5.15	3433.51	0.123197	0.123197
2020	Mizhi County	27870	13	0.000466451	0.000466451		5.15	3433.51	0.123197	0.123197
2021	Mizhi County	27870	10	0.000358809	0.000358809		5.15	3433.51	0.123197	0.123197
2012	Suide County	31225	15	0.000480384	0.000480384		3.59	2393.45	0.0766518	0.0766518
2013	Suide County	41727	16	0.000383445	0.000383445		3.59	2393.45	0.0573598	0.0573598
2014	Suide County	41741	18	0.000431231	0.000431231		3.59	2393.45	0.0573406	0.0573406
2015	Suide County	41741	19	0.000455188	0.000455188		3.59	2393.45	0.0573406	0.0573406
2016	Suide County	43083	15	0.000348165	0.000348165		3.59	2393.45	0.0555545	0.0555545
2017	Suide County	48323	17	0.000351799	0.000351799		3.59	2393.45	0.0495303	0.0495303
2018	Suide County	52394	58	0.001107	0.001107		3.59	2393.45	0.0456818	0.0456818
2019	Suide County	52405	17	0.000324397	0.000324397		3.59	2393.45	0.0456722	0.0456722
2020	Suide County	52416	18	0.000343407	0.000343407		3.59	2393.45	0.0456626	0.0456626
2021	Suide County	52427	11	0.000209816	0.000209816		3.59	2393.45	0.0456531	0.0456531
2012	Zizhou County	27859	10	0.00035895	0.00035895		3.68	2453.46	0.0880669	0.0880669
2013	Zizhou County	29789	11	0.000369264	0.000369264		3.68	2453.46	0.0823611	0.0823611
2014	Zizhou County	30484	13	0.000426453	0.000426453		3.68	2453.46	0.0804834	0.0804834
2015	Zizhou County	30440	13	0.00042707	0.00042707		3.68	2453.46	0.0805997	0.0805997
2016	Zizhou County	30594	10	0.000326861	0.000326861		3.68	2453.46	0.080194	0.080194
2017	Zizhou County	30473	10	0.000328159	0.000328159		3.68	2453.46	0.0805125	0.0805125
2018	Zizhou County	30628	14	0.000457098	0.000457098		3.68	2453.46	0.080105	0.080105
2019	Zizhou County	30628	10	0.000326499	0.000326499		3.68	2453.46	0.080105	0.080105
2020	Zizhou County	30628	6	0.000195899	0.000195899		3.68	2453.46	0.080105	0.080105
2021	Zizhou County	30628	29	0.000946846	0.000946846		3.68	2453.46	0.080105	0.080105
2012	Qingjian County	45155	14	0.000310043	0.000310043		3.26	2173.44	0.0481329	0.0481329
2013	Qingjian County	26820	16	0.00059657	0.00059657		3.26	2173.44	0.0810381	0.0810381
2014	Qingjian County	27078	17	0.000627816	0.000627816		3.26	2173.44	0.080266	0.080266
2015	Qingjian County	27079	18	0.000664722	0.000664722		3.26	2173.44	0.080263	0.080263
2016	Qingjian County	27099	13	0.000479722	0.000479722		3.26	2173.44	0.0802038	0.0802038
2017	Qingjian County	27319	14	0.000512464	0.000512464		3.26	2173.44	0.0795579	0.0795579
2018	Qingjian County	27364	5	0.000182722	0.000182722		3.26	2173.44	0.0794271	0.0794271
2019	Qingjian County	27365	14	0.000511602	0.000511602		3.26	2173.44	0.0794242	0.0794242
2020	Qingjian County	27366	23	0.000840459	0.000840459		3.26	2173.44	0.0794213	0.0794213
2021	Qingjian County	27367	9	0.000328863	0.000328863		3.26	2173.44	0.0794184	0.0794184
2012	Baota District	29748	15	0.000504236	0.000504236		12.52	8347.08	0.280593	0.280593
2013	Baota District	32450	16	0.000493066	0.000493066		12.52	8347.08	0.257229	0.257229
2014	Baota District	32382	17	0.000524983	0.000524983		12.52	8347.08	0.257769	0.257769
2015	Baota District	32431	18	0.000555025	0.000555025		12.52	8347.08	0.25738	0.25738
2016	Baota District	32360	8	0.000247219	0.000247219		12.52	8347.08	0.257944	0.257944
2017	Baota District	31201	8	0.000256402	0.000256402		12.52	8347.08	0.267526	0.267526
2018	Baota District	31685	8	0.000252485	0.000252485		12.52	8347.08	0.26344	0.26344
2019	Baota District	31435	9	0.000286305	0.000286305		12.52	8347.08	0.265535	0.265535
2020	Baota District	31563	10	0.000316827	0.000316827		12.52	8347.08	0.264458	0.264458
2021	Baota District	31691	11	0.000347102	0.000347102		12.52	8347.08	0.26339	0.26339
2012	Zichang City	31819	12	0.000377133	0.000377133		9.18	6120.31	0.192348	0.192348
2013	Zichang City	30370	12	0.000395127	0.000395127		9.18	6120.31	0.201525	0.201525
2014	Zichang City	30834	15	0.000486476	0.000486476		9.18	6120.31	0.198492	0.198492
2015	Zichang City	31263	15	0.0004798	0.0004798		9.18	6120.31	0.195768	0.195768
2016	Zichang City	31521	10	0.000317249	0.000317249		9.18	6120.31	0.194166	0.194166
2017	Zichang City	31567	11	0.000348465	0.000348465		9.18	6120.31	0.193883	0.193883
2018	Zichang City	31651	9	0.000284351	0.000284351		9.18	6120.31	0.193368	0.193368
2019	Zichang City	32518	12	0.000369026	0.000369026		9.18	6120.31	0.188213	0.188213
2020	Zichang City	32674	15	0.000459081	0.000459081		9.18	6120.31	0.187314	0.187314
2021	Zichang City	32830	18	0.000548279	0.000548279		9.18	6120.31	0.186424	0.186424
2012	Yanchuan County	32986	7	0.000212211	0.000212211		2.72	1813.42	0.0549756	0.0549756
2013	Yanchuan County	24838	7	0.000281826	0.000281826		2.72	1813.42	0.0730101	0.0730101
2014	Yanchuan County	24805	11	0.000443459	0.000443459		2.72	1813.42	0.0731072	0.0731072
2015	Yanchuan County	24805	12	0.000483773	0.000483773		2.72	1813.42	0.0731072	0.0731072
2016	Yanchuan County	24138	12	0.000497141	0.000497141		2.72	1813.42	0.0751274	0.0751274
2017	Yanchuan County	23684	13	0.000548894	0.000548894		2.72	1813.42	0.0765675	0.0765675
2018	Yanchuan County	22818	11	0.000482076	0.000482076		2.72	1813.42	0.0794734	0.0794734
2019	Yanchuan County	23524	13	0.000552627	0.000552627		2.72	1813.42	0.0770883	0.0770883
2020	Yanchuan County	23473	15	0.000639032	0.000639032		2.72	1813.42	0.0772557	0.0772557
2021	Yanchuan County	23422	17	0.000725813	0.000725813		2.72	1813.42	0.077424	0.077424
2012	Yanchang County	23371	9	0.000385093	0.000385093		5.29	3526.84	0.150907	0.150907
2013	Yanchang County	16510	9	0.000545124	0.000545124		5.29	3526.84	0.213619	0.213619
2014	Yanchang County	16530	11	0.000665457	0.000665457		5.29	3526.84	0.21336	0.21336
2015	Yanchang County	16570	11	0.00066385	0.00066385		5.29	3526.84	0.212845	0.212845
2016	Yanchang County	16570	10	0.0006035	0.0006035		5.29	3526.84	0.212845	0.212845
2017	Yanchang County	14867	10	0.000672631	0.000672631		5.29	3526.84	0.237226	0.237226
2018	Yanchang County	14715	13	0.000883452	0.000883452		5.29	3526.84	0.239677	0.239677
2019	Yanchang County	14648	11	0.000750956	0.000750956		5.29	3526.84	0.240773	0.240773
2020	Yanchang County	14635	9	0.000614964	0.000614964		5.29	3526.84	0.240987	0.240987
2021	Yanchang County	14622	7	0.000478731	0.000478731		5.29	3526.84	0.241201	0.241201
2012	Ansai District	14609	7	0.000479157	0.000479157		8.74	5826.96	0.398861	0.398861
2013	Ansai District	27200	9	0.000330882	0.000330882		8.74	5826.96	0.214226	0.214226
2014	Ansai District	27200	11	0.000404412	0.000404412		8.74	5826.96	0.214226	0.214226
2015	Ansai District	27200	11	0.000404412	0.000404412		8.74	5826.96	0.214226	0.214226
2016	Ansai District	27260	9	0.000330154	0.000330154		8.74	5826.96	0.213755	0.213755
2017	Ansai District	27260	9	0.000330154	0.000330154		8.74	5826.96	0.213755	0.213755
2018	Ansai District	37243	10	0.000268507	0.000268507		8.74	5826.96	0.156458	0.156458
2019	Ansai District	39642	10	0.000252258	0.000252258		8.74	5826.96	0.14699	0.14699
2020	Ansai District	39622	10	0.000252385	0.000252385		8.74	5826.96	0.147064	0.147064
2021	Ansai District	39602	10	0.000252512	0.000252512		8.74	5826.96	0.147138	0.147138
2012	Zhidan County	39582	13	0.000328432	0.000328432		9.58	6386.99	0.161361	0.161361
2013	Zhidan County	21200	14	0.000660377	0.000660377		9.58	6386.99	0.301273	0.301273
2014	Zhidan County	21197	15	0.000707647	0.000707647		9.58	6386.99	0.301316	0.301316
2015	Zhidan County	24417	15	0.000614326	0.000614326		9.58	6386.99	0.261579	0.261579
2016	Zhidan County	27547	9	0.000326714	0.000326714		9.58	6386.99	0.231858	0.231858
2017	Zhidan County	30187	9	0.000298142	0.000298142		9.58	6386.99	0.211581	0.211581
2018	Zhidan County	30225	9	0.000297767	0.000297767		9.58	6386.99	0.211315	0.211315
2019	Zhidan County	31381	9	0.000286798	0.000286798		9.58	6386.99	0.20353	0.20353
2020	Zhidan County	31394	9	0.000286679	0.000286679		9.58	6386.99	0.203446	0.203446
2021	Zhidan County	31407	9	0.00028656	0.00028656		9.58	6386.99	0.203362	0.203362
2012	Wuqi County	31420	16	0.00050923	0.00050923		12.15	8100.4	0.25781	0.25781
2013	Wuqi County	24520	18	0.000734095	0.000734095		12.15	8100.4	0.330359	0.330359
2014	Wuqi County	24881	18	0.000723444	0.000723444		12.15	8100.4	0.325566	0.325566
2015	Wuqi County	25066	19	0.000757999	0.000757999		12.15	8100.4	0.323163	0.323163
2016	Wuqi County	25327	13	0.000513286	0.000513286		12.15	8100.4	0.319833	0.319833
2017	Wuqi County	25320	14	0.000552923	0.000552923		12.15	8100.4	0.319921	0.319921
2018	Wuqi County	25652	14	0.000545766	0.000545766		12.15	8100.4	0.315781	0.315781
2019	Wuqi County	26340	15	0.000569476	0.000569476		12.15	8100.4	0.307532	0.307532
2020	Wuqi County	26610	16	0.000601278	0.000601278		12.15	8100.4	0.304412	0.304412
2021	Wuqi County	26880	17	0.00063244	0.00063244		12.15	8100.4	0.301354	0.301354
2012	Ganquan County	27150	8	0.000294659	0.000294659		8.18	5453.61	0.200869	0.200869
2013	Ganquan County	9586	8	0.00083455	0.00083455		8.18	5453.61	0.568914	0.568914
2014	Ganquan County	9558	9	0.00094162	0.00094162		8.18	5453.61	0.57058	0.57058
2015	Ganquan County	6110	9	0.001473	0.001473		8.18	5453.61	0.892571	0.892571
2016	Ganquan County	6006	7	0.0011655	0.0011655		8.18	5453.61	0.908026	0.908026
2017	Ganquan County	6023	7	0.00116221	0.00116221		8.18	5453.61	0.905463	0.905463
2018	Ganquan County	6013	7	0.00116414	0.00116414		8.18	5453.61	0.906969	0.906969
2019	Ganquan County	6012	8	0.00133067	0.00133067		8.18	5453.61	0.90712	0.90712
2020	Ganquan County	6005	9	0.00149875	0.00149875		8.18	5453.61	0.908178	0.908178
2021	Ganquan County	5998	10	0.00166722	0.00166722		8.18	5453.61	0.909237	0.909237
2012	Luochuan County	5991	25	0.00417293	0.00417293		7.58	5053.59	0.84353	0.84353
2013	Luochuan County	11237	28	0.00249177	0.00249177		7.58	5053.59	0.449727	0.449727
2014	Luochuan County	10657	30	0.00281505	0.00281505		7.58	5053.59	0.474203	0.474203
2015	Luochuan County	10471	32	0.00305606	0.00305606		7.58	5053.59	0.482627	0.482627
2016	Luochuan County	10286	25	0.00243049	0.00243049		7.58	5053.59	0.491307	0.491307
2017	Luochuan County	10138	26	0.00256461	0.00256461		7.58	5053.59	0.49848	0.49848
2018	Luochuan County	9885	26	0.00263025	0.00263025		7.58	5053.59	0.511238	0.511238
2019	Luochuan County	10195	26	0.00255027	0.00255027		7.58	5053.59	0.495693	0.495693
2020	Luochuan County	10274	26	0.00253066	0.00253066		7.58	5053.59	0.491881	0.491881
2021	Luochuan County	10353	26	0.00251135	0.00251135		7.58	5053.59	0.488128	0.488128
2012	Fu County	10432	15	0.00143788	0.00143788		11.65	7767.06	0.744541	0.744541
2013	Fu County	9847	16	0.00162486	0.00162486		11.65	7767.06	0.788774	0.788774
2014	Fu County	9864	18	0.00182482	0.00182482		11.65	7767.06	0.787414	0.787414
2015	Fu County	9864	18	0.00182482	0.00182482		11.65	7767.06	0.787414	0.787414
2016	Fu County	9895	11	0.00111167	0.00111167		11.65	7767.06	0.784947	0.784947
2017	Fu County	9999	11	0.00110011	0.00110011		11.65	7767.06	0.776783	0.776783
2018	Fu County	10054	12	0.00119355	0.00119355		11.65	7767.06	0.772534	0.772534
2019	Fu County	10054	12	0.00119355	0.00119355		11.65	7767.06	0.772534	0.772534
2020	Fu County	10054	12	0.00119355	0.00119355		11.65	7767.06	0.772534	0.772534
2021	Fu County	10054	12	0.00119355	0.00119355		11.65	7767.06	0.772534	0.772534
2012	Huangling County	10054	24	0.00238711	0.00238711		5.62	3746.85	0.372673	0.372673
2013	Huangling County	8938	26	0.00290893	0.00290893		5.62	3746.85	0.419205	0.419205
2014	Huangling County	8945	27	0.00301845	0.00301845		5.62	3746.85	0.418877	0.418877
2015	Huangling County	9774	27	0.00276243	0.00276243		5.62	3746.85	0.383349	0.383349
2016	Huangling County	9619	17	0.00176734	0.00176734		5.62	3746.85	0.389526	0.389526
2017	Huangling County	9241	17	0.00183963	0.00183963		5.62	3746.85	0.40546	0.40546
2018	Huangling County	8971	18	0.00200647	0.00200647		5.62	3746.85	0.417663	0.417663
2019	Huangling County	9262	18	0.00194342	0.00194342		5.62	3746.85	0.40454	0.40454
2020	Huangling County	9128	18	0.00197195	0.00197195		5.62	3746.85	0.410479	0.410479
2021	Huangling County	8994	5	0.000555926	0.000555926		5.62	3746.85	0.416595	0.416595
2012	Huanglong County	11865	7	0.000589971	0.000589971		10.23	6820.34	0.574829	0.574829
2013	Huanglong County	11891	8	0.000672778	0.000672778		10.23	6820.34	0.573572	0.573572
2014	Huanglong County	12050	8	0.0006639	0.0006639		10.23	6820.34	0.566003	0.566003
2015	Huanglong County	11950	7	0.000585774	0.000585774		10.23	6820.34	0.57074	0.57074
2016	Huanglong County	11756	7	0.000595441	0.000595441		10.23	6820.34	0.580158	0.580158
2017	Huanglong County	11611	8	0.000689002	0.000689002		10.23	6820.34	0.587403	0.587403
2018	Huanglong County	11460	8	0.00069808	0.00069808		10.23	6820.34	0.595143	0.595143
2019	Huanglong County	11028	8	0.000725426	0.000725426		10.23	6820.34	0.618457	0.618457
2020	Huanglong County	10596	8	0.000755002	0.000755002		10.23	6820.34	0.643671	0.643671
2021	Huanglong County	10164	24	0.00236128	0.00236128		10.23	6820.34	0.671029	0.671029
2012	Yichuan County	11854	26	0.00219335	0.00219335		3.97	2646.8	0.223283	0.223283
2013	Yichuan County	11807	27	0.00228678	0.00228678		3.97	2646.8	0.224172	0.224172
2014	Yichuan County	14851	28	0.00188539	0.00188539		3.97	2646.8	0.178224	0.178224
2015	Yichuan County	14669	17	0.00115891	0.00115891		3.97	2646.8	0.180435	0.180435
2016	Yichuan County	14683	18	0.00122591	0.00122591		3.97	2646.8	0.180263	0.180263
2017	Yichuan County	14923	18	0.00120619	0.00120619		3.97	2646.8	0.177364	0.177364
2018	Yichuan County	14923	18	0.00120619	0.00120619		3.97	2646.8	0.177364	0.177364
2019	Yichuan County	14917	18	0.00120668	0.00120668		3.97	2646.8	0.177435	0.177435
2020	Yichuan County	14911	18	0.00120716	0.00120716		3.97	2646.8	0.177506	0.177506
2021	Yichuan County	14905	9	0.000603824	0.000603824		3.97	2646.8	0.177578	0.177578
2012	Yijun County	19134	11	0.000574893	0.000574893		8.07	5380.27	0.281189	0.281189
2013	Yijun County	19132	12	0.000627221	0.000627221		8.07	5380.27	0.281218	0.281218
2014	Yijun County	19302	12	0.000621697	0.000621697		8.07	5380.27	0.278742	0.278742
2015	Yijun County	19451	9	0.000462701	0.000462701		8.07	5380.27	0.276606	0.276606
2016	Yijun County	20681	10	0.000483536	0.000483536		8.07	5380.27	0.260155	0.260155
2017	Yijun County	21987	11	0.000500296	0.000500296		8.07	5380.27	0.244702	0.244702
2018	Yijun County	22987	12	0.000522034	0.000522034		8.07	5380.27	0.234057	0.234057
2019	Yijun County	25137	13	0.000517166	0.000517166		8.07	5380.27	0.214038	0.214038
2020	Yijun County	27287	14	0.000513065	0.000513065		8.07	5380.27	0.197173	0.197173
2021	Yijun County	29437	20	0.000679417	0.000679417		8.07	5380.27	0.182772	0.182772
2012	Yaozhou District	32624	22	0.00067435	0.00067435		9.64	6426.99	0.197002	0.197002
2013	Yaozhou District	32335	23	0.000711304	0.000711304		9.64	6426.99	0.198763	0.198763
2014	Yaozhou District	32154	24	0.000746408	0.000746408		9.64	6426.99	0.199881	0.199881
2015	Yaozhou District	32040	13	0.000405743	0.000405743		9.64	6426.99	0.200593	0.200593
2016	Yaozhou District	31815	14	0.000440044	0.000440044		9.64	6426.99	0.202011	0.202011
2017	Yaozhou District	31644	13	0.00041082	0.00041082		9.64	6426.99	0.203103	0.203103
2018	Yaozhou District	31690	13	0.000410224	0.000410224		9.64	6426.99	0.202808	0.202808
2019	Yaozhou District	28415	13	0.000457505	0.000457505		9.64	6426.99	0.226183	0.226183
2020	Yaozhou District	25140	13	0.000517104	0.000517104		9.64	6426.99	0.255648	0.255648
2021	Yaozhou District	21865	6	0.000274411	0.000274411		9.64	6426.99	0.29394	0.29394
2012	Wangyi District	3891	7	0.00179902	0.00179902		3.13	2086.77	0.536307	0.536307
2013	Wangyi District	3938	7	0.00177755	0.00177755		3.13	2086.77	0.529906	0.529906
2014	Wangyi District	3977	7	0.00176012	0.00176012		3.13	2086.77	0.52471	0.52471
2015	Wangyi District	3988	4	0.00100301	0.00100301		3.13	2086.77	0.523263	0.523263
2016	Wangyi District	5333	3	0.000562535	0.000562535		3.13	2086.77	0.391294	0.391294
2017	Wangyi District	5327	3	0.000563169	0.000563169		3.13	2086.77	0.391735	0.391735
2018	Wangyi District	5300	3	0.000566038	0.000566038		3.13	2086.77	0.39373	0.39373
2019	Wangyi District	5285	3	0.000567644	0.000567644		3.13	2086.77	0.394848	0.394848
2020	Wangyi District	5270	3	0.00056926	0.00056926		3.13	2086.77	0.395972	0.395972
2021	Wangyi District	5255	9	0.00171265	0.00171265		3.13	2086.77	0.397102	0.397102
2012	Yintai District	8924	11	0.00123263	0.00123263		4.78	3186.83	0.357107	0.357107
2013	Yintai District	9269	11	0.00118675	0.00118675		4.78	3186.83	0.343816	0.343816
2014	Yintai District	9208	12	0.00130321	0.00130321		4.78	3186.83	0.346093	0.346093
2015	Yintai District	9223	6	0.000650548	0.000650548		4.78	3186.83	0.34553	0.34553
2016	Yintai District	9333	6	0.00064288	0.00064288		4.78	3186.83	0.341458	0.341458
2017	Yintai District	9550	7	0.000732984	0.000732984		4.78	3186.83	0.333699	0.333699
2018	Yintai District	9435	7	0.000741918	0.000741918		4.78	3186.83	0.337766	0.337766
2019	Yintai District	9456	7	0.000740271	0.000740271		4.78	3186.83	0.337016	0.337016
2020	Yintai District	9477	7	0.00073863	0.00073863		4.78	3186.83	0.336269	0.336269
2021	Yintai District	9498	35	0.00368499	0.00368499		4.78	3186.83	0.335526	0.335526
2012	Baishui County	28577	38	0.00132974	0.00132974		12.9	8600.43	0.300956	0.300956
2013	Baishui County	28704	40	0.00139353	0.00139353		12.9	8600.43	0.299625	0.299625
2014	Baishui County	28718	41	0.00142768	0.00142768		12.9	8600.43	0.299479	0.299479
2015	Baishui County	28735	40	0.00139203	0.00139203		12.9	8600.43	0.299302	0.299302
2016	Baishui County	26165	32	0.00122301	0.00122301		12.9	8600.43	0.3287	0.3287
2017	Baishui County	26387	33	0.00125062	0.00125062		12.9	8600.43	0.325934	0.325934
2018	Baishui County	26112	31	0.00118719	0.00118719		12.9	8600.43	0.329367	0.329367
2019	Baishui County	25985	29	0.00111603	0.00111603		12.9	8600.43	0.330977	0.330977
2020	Baishui County	25858	27	0.00104416	0.00104416		12.9	8600.43	0.332602	0.332602
2021	Baishui County	25731	29	0.00112705	0.00112705		12.9	8600.43	0.334244	0.334244
2012	Chengcheng County	45504	32	0.000703235	0.000703235		31.19	20794.4	0.456979	0.456979
2013	Chengcheng County	46307	35	0.000755825	0.000755825		31.19	20794.4	0.449055	0.449055
2014	Chengcheng County	46925	37	0.000788492	0.000788492		31.19	20794.4	0.443141	0.443141
2015	Chengcheng County	46655	40	0.000857357	0.000857357		31.19	20794.4	0.445705	0.445705
2016	Chengcheng County	46884	35	0.000746523	0.000746523		31.19	20794.4	0.443528	0.443528
2017	Chengcheng County	47193	38	0.000805204	0.000805204		31.19	20794.4	0.440624	0.440624
2018	Chengcheng County	48127	101	0.00209861	0.00209861		31.19	20794.4	0.432073	0.432073
2019	Chengcheng County	47998	164	0.00341681	0.00341681		31.19	20794.4	0.433234	0.433234
2020	Chengcheng County	47869	227	0.00474211	0.00474211		31.19	20794.4	0.434402	0.434402
2021	Chengcheng County	47740	28	0.00058651	0.00058651		31.19	20794.4	0.435575	0.435575
2012	Hancheng City	26882	28	0.00104159	0.00104159		1.66	1106.72	0.0411696	0.0411696
2013	Hancheng City	27240	30	0.00110132	0.00110132		1.66	1106.72	0.0406286	0.0406286
2014	Hancheng City	25305	31	0.00122505	0.00122505		1.66	1106.72	0.0437353	0.0437353
2015	Hancheng City	23370	28	0.00119812	0.00119812		1.66	1106.72	0.0473565	0.0473565
2016	Hancheng City	24709	26	0.00105225	0.00105225		1.66	1106.72	0.0447902	0.0447902
2017	Hancheng City	24573	25	0.00101738	0.00101738		1.66	1106.72	0.0450381	0.0450381
2018	Hancheng City	24408	24	0.000983284	0.000983284		1.66	1106.72	0.0453426	0.0453426
2019	Hancheng City	24089	23	0.000954793	0.000954793		1.66	1106.72	0.045943	0.045943
2020	Hancheng City	23770	22	0.000925536	0.000925536		1.66	1106.72	0.0465596	0.0465596
2021	Hancheng City	23451	10	0.000426421	0.000426421		1.66	1106.72	0.047193	0.047193
2012	Heyang County	27766	27	0.000972412	0.000972412		38.73	25821.3	0.929961	0.929961
2013	Heyang County	58383	30	0.000513848	0.000513848		38.73	25821.3	0.442274	0.442274
2014	Heyang County	58628	31	0.000528758	0.000528758		38.73	25821.3	0.440426	0.440426
2015	Heyang County	58395	32	0.000547992	0.000547992		38.73	25821.3	0.442183	0.442183
2016	Heyang County	58535	32	0.000546681	0.000546681		38.73	25821.3	0.441126	0.441126
2017	Heyang County	58324	30	0.000514368	0.000514368		38.73	25821.3	0.442722	0.442722
2018	Heyang County	58406	33	0.00056501	0.00056501		38.73	25821.3	0.4421	0.4421
2019	Heyang County	58580	34	0.000580403	0.000580403		38.73	25821.3	0.440787	0.440787
2020	Heyang County	58402	35	0.000599295	0.000599295		38.73	25821.3	0.44213	0.44213
2021	Heyang County	58224	36	0.000618302	0.000618302		38.73	25821.3	0.443482	0.443482
2012	Xunyi County	58046	11	0.000189505	0.000189505		13.97	9313.8	0.160455	0.160455
2013	Xunyi County	27767	12	0.000432168	0.000432168		13.97	9313.8	0.335427	0.335427
2014	Xunyi County	27678	14	0.000505817	0.000505817		13.97	9313.8	0.336505	0.336505
2015	Xunyi County	27752	10	0.000360334	0.000360334		13.97	9313.8	0.335608	0.335608
2016	Xunyi County	27816	10	0.000359505	0.000359505		13.97	9313.8	0.334836	0.334836
2017	Xunyi County	27786	10	0.000359893	0.000359893		13.97	9313.8	0.335198	0.335198
2018	Xunyi County	27786	13	0.000467862	0.000467862		13.97	9313.8	0.335198	0.335198
2019	Xunyi County	27786	16	0.00057583	0.00057583		13.97	9313.8	0.335198	0.335198
2020	Xunyi County	27786	19	0.000683798	0.000683798		13.97	9313.8	0.335198	0.335198
2021	Xunyi County	27786	12	0.000431872	0.000431872		13.97	9313.8	0.335198	0.335198
2012	Changwu County	11058	13	0.00117562	0.00117562		10.65	7100.35	0.642101	0.642101
2013	Changwu County	11223	14	0.00124744	0.00124744		10.65	7100.35	0.632661	0.632661
2014	Changwu County	11666	15	0.00128579	0.00128579		10.65	7100.35	0.608637	0.608637
2015	Changwu County	11708	14	0.00119576	0.00119576		10.65	7100.35	0.606453	0.606453
2016	Changwu County	11775	13	0.00110403	0.00110403		10.65	7100.35	0.603003	0.603003
2017	Changwu County	11831	12	0.00101428	0.00101428		10.65	7100.35	0.600148	0.600148
2018	Changwu County	11909	17	0.00142749	0.00142749		10.65	7100.35	0.596218	0.596218
2019	Changwu County	12021	22	0.00183013	0.00183013		10.65	7100.35	0.590663	0.590663
2020	Changwu County	12133	27	0.00222534	0.00222534		10.65	7100.35	0.58521	0.58521
2021	Changwu County	12245	14	0.00114332	0.00114332		10.65	7100.35	0.579857	0.579857
2012	Yongshou County	19256	17	0.000882842	0.000882842		20.49	13660.7	0.709425	0.709425
2013	Yongshou County	19553	18	0.000920575	0.000920575		20.49	13660.7	0.698649	0.698649
2014	Yongshou County	20402	20	0.000980296	0.000980296		20.49	13660.7	0.669576	0.669576
2015	Yongshou County	20405	17	0.000833129	0.000833129		20.49	13660.7	0.669477	0.669477
2016	Yongshou County	20472	20	0.000976944	0.000976944		20.49	13660.7	0.667286	0.667286
2017	Yongshou County	20538	21	0.00102249	0.00102249		20.49	13660.7	0.665142	0.665142
2018	Yongshou County	20546	23	0.00111944	0.00111944		20.49	13660.7	0.664883	0.664883
2019	Yongshou County	20555	25	0.00121625	0.00121625		20.49	13660.7	0.664592	0.664592
2020	Yongshou County	20564	27	0.00131297	0.00131297		20.49	13660.7	0.664301	0.664301
2021	Yongshou County	20573	10	0.000486074	0.000486074		20.49	13660.7	0.66401	0.66401
2012	Binzhou City	30551	11	0.000360054	0.000360054		15.28	10187.2	0.333448	0.333448
2013	Binzhou City	31169	13	0.000417081	0.000417081		15.28	10187.2	0.326837	0.326837
2014	Binzhou City	31283	14	0.000447527	0.000447527		15.28	10187.2	0.325646	0.325646
2015	Binzhou City	31430	14	0.000445434	0.000445434		15.28	10187.2	0.324123	0.324123
2016	Binzhou City	31583	15	0.000474939	0.000474939		15.28	10187.2	0.322553	0.322553
2017	Binzhou City	31755	16	0.000503858	0.000503858		15.28	10187.2	0.320805	0.320805
2018	Binzhou City	31930	21	0.000657689	0.000657689		15.28	10187.2	0.319047	0.319047
2019	Binzhou City	32049	26	0.000811258	0.000811258		15.28	10187.2	0.317863	0.317863
2020	Binzhou City	32168	31	0.000963691	0.000963691		15.28	10187.2	0.316687	0.316687
2021	Binzhou City	32287	19	0.000588472	0.000588472		15.28	10187.2	0.315519	0.315519
2012	Chunhua County	25432	23	0.000904372	0.000904372		11.47	7647.05	0.300686	0.300686
2013	Chunhua County	26034	24	0.000921871	0.000921871		11.47	7647.05	0.293733	0.293733
2014	Chunhua County	27330	25	0.000914746	0.000914746		11.47	7647.05	0.279804	0.279804
2015	Chunhua County	28754	15	0.000521667	0.000521667		11.47	7647.05	0.265947	0.265947
2016	Chunhua County	28756	15	0.00052163	0.00052163		11.47	7647.05	0.265929	0.265929
2017	Chunhua County	28762	16	0.00055629	0.00055629		11.47	7647.05	0.265873	0.265873
2018	Chunhua County	28670	11	0.000383676	0.000383676		11.47	7647.05	0.266727	0.266727
2019	Chunhua County	28698	6	0.000209074	0.000209074		11.47	7647.05	0.266466	0.266466
2020	Chunhua County	28726	1	3.48117e-05	3.48117e-05		11.47	7647.05	0.266207	0.266207
2021	Chunhua County	28754	6	0.000208667	0.000208667		11.47	7647.05	0.265947	0.265947
2012	Linyou County	29530	7	0.000237047	0.000237047		7.83	5220.26	0.176778	0.176778
2013	Linyou County	30252	8	0.000264445	0.000264445		7.83	5220.26	0.172559	0.172559
2014	Linyou County	30045	8	0.000266267	0.000266267		7.83	5220.26	0.173748	0.173748
2015	Linyou County	30057	5	0.000166351	0.000166351		7.83	5220.26	0.173679	0.173679
2016	Linyou County	30057	5	0.000166351	0.000166351		7.83	5220.26	0.173679	0.173679
2017	Linyou County	29546	5	0.000169228	0.000169228		7.83	5220.26	0.176682	0.176682
2018	Linyou County	29464	12	0.000407277	0.000407277		7.83	5220.26	0.177174	0.177174
2019	Linyou County	29205	19	0.000650574	0.000650574		7.83	5220.26	0.178745	0.178745
2020	Linyou County	28946	26	0.000898224	0.000898224		7.83	5220.26	0.180345	0.180345
2021	Linyou County	28687	10	0.00034859	0.00034859		7.83	5220.26	0.181973	0.181973
2012	Feng County	9714	11	0.00113239	0.00113239		4.51	3006.82	0.309534	0.309534
2013	Feng County	9645	11	0.00114049	0.00114049		4.51	3006.82	0.311749	0.311749
2014	Feng County	9624	12	0.00124688	0.00124688		4.51	3006.82	0.312429	0.312429
2015	Feng County	9631	6	0.000622988	0.000622988		4.51	3006.82	0.312202	0.312202
2016	Feng County	9620	6	0.000623701	0.000623701		4.51	3006.82	0.312559	0.312559
2017	Feng County	9585	6	0.000625978	0.000625978		4.51	3006.82	0.3137	0.3137
2018	Feng County	9439	5	0.000529717	0.000529717		4.51	3006.82	0.318552	0.318552
2019	Feng County	9368	4	0.000426985	0.000426985		4.51	3006.82	0.320967	0.320967
2020	Feng County	9297	3	0.000322685	0.000322685		4.51	3006.82	0.323418	0.323418
2021	Feng County	9226	6	0.000650336	0.000650336		4.51	3006.82	0.325907	0.325907
2012	Taibai County	6513	7	0.00107477	0.00107477		0.8	533.36	0.0818916	0.0818916
2013	Taibai County	6482	7	0.00107991	0.00107991		0.8	533.36	0.0822832	0.0822832
2014	Taibai County	6460	8	0.00123839	0.00123839		0.8	533.36	0.0825635	0.0825635
2015	Taibai County	6475	6	0.000926641	0.000926641		0.8	533.36	0.0823722	0.0823722
2016	Taibai County	6498	6	0.000923361	0.000923361		0.8	533.36	0.0820806	0.0820806
2017	Taibai County	6470	6	0.000927357	0.000927357		0.8	533.36	0.0824359	0.0824359
2018	Taibai County	6475	6	0.000926641	0.000926641		0.8	533.36	0.0823722	0.0823722
2019	Taibai County	6465	6	0.000928074	0.000928074		0.8	533.36	0.0824996	0.0824996
2020	Taibai County	6455	6	0.000929512	0.000929512		0.8	533.36	0.0826274	0.0826274
2021	Taibai County	6445	23	0.00356866	0.00356866		0.8	533.36	0.0827556	0.0827556
2012	Lueyang County	10074	25	0.00248164	0.00248164		5.36	3573.51	0.354726	0.354726
2013	Lueyang County	10072	25	0.00248213	0.00248213		5.36	3573.51	0.354797	0.354797
2014	Lueyang County	10046	25	0.00248855	0.00248855		5.36	3573.51	0.355715	0.355715
2015	Lueyang County	10046	21	0.00209038	0.00209038		5.36	3573.51	0.355715	0.355715
2016	Lueyang County	10046	22	0.00218993	0.00218993		5.36	3573.51	0.355715	0.355715
2017	Lueyang County	10046	22	0.00218993	0.00218993		5.36	3573.51	0.355715	0.355715
2018	Lueyang County	10046	22	0.00218993	0.00218993		5.36	3573.51	0.355715	0.355715
2019	Lueyang County	10045	22	0.00219014	0.00219014		5.36	3573.51	0.35575	0.35575
2020	Lueyang County	10044	22	0.00219036	0.00219036		5.36	3573.51	0.355786	0.355786
2021	Lueyang County	10043	14	0.00139401	0.00139401		5.36	3573.51	0.355821	0.355821
2012	Ningqiang County	21256	15	0.000705683	0.000705683		5	3333.5	0.156826	0.156826
2013	Ningqiang County	21259	17	0.000799661	0.000799661		5	3333.5	0.156804	0.156804
2014	Ningqiang County	21263	18	0.000846541	0.000846541		5	3333.5	0.156775	0.156775
2015	Ningqiang County	21267	19	0.000893403	0.000893403		5	3333.5	0.156745	0.156745
2016	Ningqiang County	21249	20	0.000941221	0.000941221		5	3333.5	0.156878	0.156878
2017	Ningqiang County	21296	21	0.000986101	0.000986101		5	3333.5	0.156532	0.156532
2018	Ningqiang County	21164	21	0.000992251	0.000992251		5	3333.5	0.157508	0.157508
2019	Ningqiang County	21173	21	0.000991829	0.000991829		5	3333.5	0.157441	0.157441
2020	Ningqiang County	21182	21	0.000991408	0.000991408		5	3333.5	0.157374	0.157374
2021	Ningqiang County	21191	2	9.43797e-05	9.43797e-05		5	3333.5	0.157307	0.157307
2012	Foping County	1833	4	0.00218221	0.00218221		0.41	273.347	0.149125	0.149125
2013	Foping County	1833	4	0.00218221	0.00218221		0.41	273.347	0.149125	0.149125
2014	Foping County	1871	4	0.00213789	0.00213789		0.41	273.347	0.146097	0.146097
2015	Foping County	1883	3	0.0015932	0.0015932		0.41	273.347	0.145166	0.145166
2016	Foping County	1854	3	0.00161812	0.00161812		0.41	273.347	0.147436	0.147436
2017	Foping County	1849	3	0.0016225	0.0016225		0.41	273.347	0.147835	0.147835
2018	Foping County	1855	3	0.00161725	0.00161725		0.41	273.347	0.147357	0.147357
2019	Foping County	1853	3	0.001619	0.001619		0.41	273.347	0.147516	0.147516
2020	Foping County	1851	3	0.00162075	0.00162075		0.41	273.347	0.147675	0.147675
2021	Foping County	1849	2	0.00108167	0.00108167		0.41	273.347	0.147835	0.147835
2012	Liuba County	3086	3	0.000972132	0.000972132		1.64	1093.39	0.354306	0.354306
2013	Liuba County	3086	3	0.000972132	0.000972132		1.64	1093.39	0.354306	0.354306
2014	Liuba County	3066	4	0.00130463	0.00130463		1.64	1093.39	0.356617	0.356617
2015	Liuba County	3061	4	0.00130676	0.00130676		1.64	1093.39	0.3572	0.3572
2016	Liuba County	3131	4	0.00127755	0.00127755		1.64	1093.39	0.349214	0.349214
2017	Liuba County	3144	4	0.00127226	0.00127226		1.64	1093.39	0.34777	0.34777
2018	Liuba County	3118	4	0.00128287	0.00128287		1.64	1093.39	0.35067	0.35067
2019	Liuba County	3134	4	0.00127632	0.00127632		1.64	1093.39	0.348879	0.348879
2020	Liuba County	3150	4	0.00126984	0.00126984		1.64	1093.39	0.347107	0.347107
2021	Liuba County	3166	32	0.0101074	0.0101074		1.64	1093.39	0.345353	0.345353
2012	Xixiang County	21711	33	0.00151997	0.00151997		10	6667	0.307079	0.307079
2013	Xixiang County	21861	33	0.00150954	0.00150954		10	6667	0.304972	0.304972
2014	Xixiang County	21950	35	0.00159453	0.00159453		10	6667	0.303736	0.303736
2015	Xixiang County	21950	27	0.00123007	0.00123007		10	6667	0.303736	0.303736
2016	Xixiang County	21950	27	0.00123007	0.00123007		10	6667	0.303736	0.303736
2017	Xixiang County	21950	24	0.00109339	0.00109339		10	6667	0.303736	0.303736
2018	Xixiang County	22345	23	0.00102931	0.00102931		10	6667	0.298367	0.298367
2019	Xixiang County	22345	22	0.00098456	0.00098456		10	6667	0.298367	0.298367
2020	Xixiang County	22345	21	0.000939808	0.000939808		10	6667	0.298367	0.298367
2021	Xixiang County	22345	9	0.000402775	0.000402775		10	6667	0.298367	0.298367
2012	Zhenba County	23674	10	0.000422404	0.000422404		7.59	5060.25	0.213747	0.213747
2013	Zhenba County	23650	10	0.000422833	0.000422833		7.59	5060.25	0.213964	0.213964
2014	Zhenba County	23631	10	0.000423173	0.000423173		7.59	5060.25	0.214136	0.214136
2015	Zhenba County	23620	8	0.000338696	0.000338696		7.59	5060.25	0.214236	0.214236
2016	Zhenba County	23699	7	0.000295371	0.000295371		7.59	5060.25	0.213522	0.213522
2017	Zhenba County	23814	7	0.000293945	0.000293945		7.59	5060.25	0.212491	0.212491
2018	Zhenba County	24026	7	0.000291351	0.000291351		7.59	5060.25	0.210616	0.210616
2019	Zhenba County	24058	7	0.000290964	0.000290964		7.59	5060.25	0.210336	0.210336
2020	Zhenba County	24090	7	0.000290577	0.000290577		7.59	5060.25	0.210056	0.210056
2021	Zhenba County	24122	12	0.000497471	0.000497471		7.59	5060.25	0.209778	0.209778
2012	Hantai District	14923	14	0.000938149	0.000938149		16.21	10807.2	0.724198	0.724198
2013	Hantai District	14815	15	0.00101249	0.00101249		16.21	10807.2	0.729477	0.729477
2014	Hantai District	14773	17	0.00115075	0.00115075		16.21	10807.2	0.731551	0.731551
2015	Hantai District	14618	17	0.00116295	0.00116295		16.21	10807.2	0.739308	0.739308
2016	Hantai District	14064	18	0.00127986	0.00127986		16.21	10807.2	0.768431	0.768431
2017	Hantai District	13787	18	0.00130558	0.00130558		16.21	10807.2	0.783869	0.783869
2018	Hantai District	13740	19	0.00138282	0.00138282		16.21	10807.2	0.786551	0.786551
2019	Hantai District	13490	20	0.00148258	0.00148258		16.21	10807.2	0.801127	0.801127
2020	Hantai District	13240	21	0.0015861	0.0015861		16.21	10807.2	0.816254	0.816254
2021	Hantai District	12990	13	0.00100077	0.00100077		16.21	10807.2	0.831964	0.831964
2012	Mian County	26231	16	0.000609965	0.000609965		18.37	12247.3	0.466901	0.466901
2013	Mian County	26284	17	0.000646781	0.000646781		18.37	12247.3	0.465959	0.465959
2014	Mian County	26321	19	0.000721857	0.000721857		18.37	12247.3	0.465304	0.465304
2015	Mian County	26480	17	0.000641994	0.000641994		18.37	12247.3	0.462511	0.462511
2016	Mian County	26605	17	0.000638978	0.000638978		18.37	12247.3	0.460337	0.460337
2017	Mian County	28034	19	0.000677748	0.000677748		18.37	12247.3	0.436872	0.436872
2018	Mian County	28557	20	0.000700354	0.000700354		18.37	12247.3	0.428871	0.428871
2019	Mian County	28354	21	0.000740636	0.000740636		18.37	12247.3	0.431942	0.431942
2020	Mian County	28151	22	0.0007815	0.0007815		18.37	12247.3	0.435057	0.435057
2021	Mian County	27948	18	0.000644053	0.000644053		18.37	12247.3	0.438217	0.438217
2012	Nanzheng District	30224	20	0.000661726	0.000661726		19.16	12774	0.422643	0.422643
2013	Nanzheng District	30164	22	0.000729346	0.000729346		19.16	12774	0.423484	0.423484
2014	Nanzheng District	30446	22	0.000722591	0.000722591		19.16	12774	0.419562	0.419562
2015	Nanzheng District	29194	21	0.000719326	0.000719326		19.16	12774	0.437555	0.437555
2016	Nanzheng District	29198	23	0.000787725	0.000787725		19.16	12774	0.437495	0.437495
2017	Nanzheng District	34351	23	0.000669558	0.000669558		19.16	12774	0.371866	0.371866
2018	Nanzheng District	34783	23	0.000661243	0.000661243		19.16	12774	0.367248	0.367248
2019	Nanzheng District	36179	23	0.000635728	0.000635728		19.16	12774	0.353077	0.353077
2020	Nanzheng District	37575	23	0.000612109	0.000612109		19.16	12774	0.339959	0.339959
2021	Nanzheng District	38971	20	0.000513202	0.000513202		19.16	12774	0.327781	0.327781
2012	Chenggu County	24326	23	0.00094549	0.00094549		16.43	10953.9	0.450295	0.450295
2013	Chenggu County	24325	24	0.000986639	0.000986639		16.43	10953.9	0.450314	0.450314
2014	Chenggu County	24150	25	0.0010352	0.0010352		16.43	10953.9	0.453577	0.453577
2015	Chenggu County	24143	23	0.000952657	0.000952657		16.43	10953.9	0.453708	0.453708
2016	Chenggu County	23999	24	0.00100004	0.00100004		16.43	10953.9	0.456431	0.456431
2017	Chenggu County	23908	25	0.00104568	0.00104568		16.43	10953.9	0.458168	0.458168
2018	Chenggu County	23797	25	0.00105055	0.00105055		16.43	10953.9	0.460305	0.460305
2019	Chenggu County	23781	25	0.00105126	0.00105126		16.43	10953.9	0.460615	0.460615
2020	Chenggu County	23765	25	0.00105197	0.00105197		16.43	10953.9	0.460925	0.460925
2021	Chenggu County	23749	19	0.000800034	0.000800034		16.43	10953.9	0.461235	0.461235
2012	Yang County	27923	21	0.000752068	0.000752068		14.06	9373.8	0.335702	0.335702
2013	Yang County	27732	22	0.000793307	0.000793307		14.06	9373.8	0.338014	0.338014
2014	Yang County	27636	23	0.000832248	0.000832248		14.06	9373.8	0.339188	0.339188
2015	Yang County	27790	20	0.000719683	0.000719683		14.06	9373.8	0.337308	0.337308
2016	Yang County	27972	20	0.000715001	0.000715001		14.06	9373.8	0.335114	0.335114
2017	Yang County	28031	20	0.000713496	0.000713496		14.06	9373.8	0.334408	0.334408
2018	Yang County	27968	22	0.000786613	0.000786613		14.06	9373.8	0.335162	0.335162
2019	Yang County	27962	24	0.000858308	0.000858308		14.06	9373.8	0.335234	0.335234
2020	Yang County	27956	26	0.000930033	0.000930033		14.06	9373.8	0.335306	0.335306
2021	Yang County	27950	39	0.00139535	0.00139535		14.06	9373.8	0.335378	0.335378
2012	Hanbin District	42932	43	0.00100158	0.00100158		12.82	8547.09	0.199084	0.199084
2013	Hanbin District	42740	53	0.00124006	0.00124006		12.82	8547.09	0.199979	0.199979
2014	Hanbin District	41938	55	0.00131146	0.00131146		12.82	8547.09	0.203803	0.203803
2015	Hanbin District	41582	56	0.00134674	0.00134674		12.82	8547.09	0.205548	0.205548
2016	Hanbin District	40841	58	0.00142014	0.00142014		12.82	8547.09	0.209277	0.209277
2017	Hanbin District	40706	62	0.00152312	0.00152312		12.82	8547.09	0.209971	0.209971
2018	Hanbin District	40566	66	0.00162698	0.00162698		12.82	8547.09	0.210696	0.210696
2019	Hanbin District	40426	70	0.00173156	0.00173156		12.82	8547.09	0.211426	0.211426
2020	Hanbin District	40286	17	0.000421983	0.000421983		12.82	8547.09	0.21216	0.21216
2021	Hanbin District	23285	8	0.000343569	0.000343569		12.82	8547.09	0.367064	0.367064
2012	Langao County	17184	8	0.000465549	0.000465549		3.19	2126.77	0.123765	0.123765
2013	Langao County	17180	9	0.000523865	0.000523865		3.19	2126.77	0.123794	0.123794
2014	Langao County	16807	9	0.000535491	0.000535491		3.19	2126.77	0.126541	0.126541
2015	Langao County	17050	10	0.00058651	0.00058651		3.19	2126.77	0.124737	0.124737
2016	Langao County	17057	10	0.00058627	0.00058627		3.19	2126.77	0.124686	0.124686
2017	Langao County	16806	10	0.000595026	0.000595026		3.19	2126.77	0.126548	0.126548
2018	Langao County	16811	11	0.000654333	0.000654333		3.19	2126.77	0.126511	0.126511
2019	Langao County	16816	12	0.000713606	0.000713606		3.19	2126.77	0.126473	0.126473
2020	Langao County	16821	10	0.000594495	0.000594495		3.19	2126.77	0.126436	0.126436
2021	Langao County	18379	18	0.000979379	0.000979379		3.19	2126.77	0.115718	0.115718
2012	Hanyin County	23269	19	0.000816537	0.000816537		8.89	5926.96	0.254715	0.254715
2013	Hanyin County	23041	22	0.00095482	0.00095482		8.89	5926.96	0.257235	0.257235
2014	Hanyin County	22947	22	0.000958731	0.000958731		8.89	5926.96	0.258289	0.258289
2015	Hanyin County	22901	23	0.00100432	0.00100432		8.89	5926.96	0.258808	0.258808
2016	Hanyin County	22919	24	0.00104717	0.00104717		8.89	5926.96	0.258605	0.258605
2017	Hanyin County	22811	25	0.00109596	0.00109596		8.89	5926.96	0.259829	0.259829
2018	Hanyin County	22630	26	0.00114892	0.00114892		8.89	5926.96	0.261907	0.261907
2019	Hanyin County	22449	27	0.00120273	0.00120273		8.89	5926.96	0.264019	0.264019
2020	Hanyin County	22268	12	0.00053889	0.00053889		8.89	5926.96	0.266165	0.266165
2021	Hanyin County	13086	12	0.000917011	0.000917011		8.89	5926.96	0.452924	0.452924
2012	Shiquan County	13099	12	0.0009161	0.0009161		6.07	4046.87	0.308945	0.308945
2013	Shiquan County	13100	12	0.000916031	0.000916031		6.07	4046.87	0.308921	0.308921
2014	Shiquan County	13111	13	0.000991534	0.000991534		6.07	4046.87	0.308662	0.308662
2015	Shiquan County	13118	13	0.000991005	0.000991005		6.07	4046.87	0.308497	0.308497
2016	Shiquan County	13129	14	0.00106634	0.00106634		6.07	4046.87	0.308239	0.308239
2017	Shiquan County	13094	15	0.00114556	0.00114556		6.07	4046.87	0.309063	0.309063
2018	Shiquan County	13141	16	0.00121756	0.00121756		6.07	4046.87	0.307957	0.307957
2019	Shiquan County	13188	17	0.00128905	0.00128905		6.07	4046.87	0.30686	0.30686
2020	Shiquan County	13235	5	0.000377786	0.000377786		6.07	4046.87	0.30577	0.30577
2021	Shiquan County	3386	5	0.00147667	0.00147667		6.07	4046.87	1.19518	1.19518
2012	Ningshan County	3390	5	0.00147493	0.00147493		3.3	2200.11	0.649	0.649
2013	Ningshan County	3392	5	0.00147406	0.00147406		3.3	2200.11	0.648617	0.648617
2014	Ningshan County	3403	5	0.00146929	0.00146929		3.3	2200.11	0.646521	0.646521
2015	Ningshan County	3404	6	0.00176263	0.00176263		3.3	2200.11	0.646331	0.646331
2016	Ningshan County	3404	6	0.00176263	0.00176263		3.3	2200.11	0.646331	0.646331
2017	Ningshan County	3404	6	0.00176263	0.00176263		3.3	2200.11	0.646331	0.646331
2018	Ningshan County	3414	7	0.00205038	0.00205038		3.3	2200.11	0.644438	0.644438
2019	Ningshan County	3424	8	0.00233645	0.00233645		3.3	2200.11	0.642555	0.642555
2020	Ningshan County	3434	14	0.00407688	0.00407688		3.3	2200.11	0.640684	0.640684
2021	Ningshan County	24386	14	0.0005741	0.0005741		3.3	2200.11	0.0902202	0.0902202
2012	Ziyang County	24370	14	0.000574477	0.000574477		3.58	2386.79	0.0979395	0.0979395
2013	Ziyang County	24249	16	0.000659821	0.000659821		3.58	2386.79	0.0984282	0.0984282
2014	Ziyang County	24259	16	0.000659549	0.000659549		3.58	2386.79	0.0983876	0.0983876
2015	Ziyang County	24255	17	0.000700886	0.000700886		3.58	2386.79	0.0984039	0.0984039
2016	Ziyang County	24036	17	0.000707272	0.000707272		3.58	2386.79	0.0993005	0.0993005
2017	Ziyang County	22691	18	0.000793266	0.000793266		3.58	2386.79	0.105186	0.105186
2018	Ziyang County	22578	20	0.000885818	0.000885818		3.58	2386.79	0.105713	0.105713
2019	Ziyang County	22465	22	0.000979301	0.000979301		3.58	2386.79	0.106245	0.106245
2020	Ziyang County	22352	8	0.00035791	0.00035791		3.58	2386.79	0.106782	0.106782
2021	Ziyang County	17168	23	0.0013397	0.0013397		3.58	2386.79	0.139025	0.139025
2012	Xunyang City	36361	27	0.000742554	0.000742554		9.89	6593.66	0.181339	0.181339
2013	Xunyang City	36410	29	0.000796484	0.000796484		9.89	6593.66	0.181095	0.181095
2014	Xunyang City	36542	30	0.000820973	0.000820973		9.89	6593.66	0.180441	0.180441
2015	Xunyang City	36650	30	0.000818554	0.000818554		9.89	6593.66	0.179909	0.179909
2016	Xunyang City	36659	31	0.000845631	0.000845631		9.89	6593.66	0.179865	0.179865
2017	Xunyang City	36600	32	0.000874317	0.000874317		9.89	6593.66	0.180155	0.180155
2018	Xunyang City	36772	34	0.000924617	0.000924617		9.89	6593.66	0.179312	0.179312
2019	Xunyang City	36944	36	0.000974448	0.000974448		9.89	6593.66	0.178477	0.178477
2020	Xunyang City	37116	11	0.000296368	0.000296368		9.89	6593.66	0.17765	0.17765
2021	Xunyang City	13840	11	0.000794798	0.000794798		9.89	6593.66	0.476421	0.476421
2012	Pingli County	18372	12	0.000653168	0.000653168		6.15	4100.2	0.223177	0.223177
2013	Pingli County	18332	13	0.000709142	0.000709142		6.15	4100.2	0.223664	0.223664
2014	Pingli County	18287	13	0.000710888	0.000710888		6.15	4100.2	0.224214	0.224214
2015	Pingli County	18152	14	0.000771265	0.000771265		6.15	4100.2	0.225882	0.225882
2016	Pingli County	18245	15	0.000822143	0.000822143		6.15	4100.2	0.22473	0.22473
2017	Pingli County	18216	16	0.000878349	0.000878349		6.15	4100.2	0.225088	0.225088
2018	Pingli County	18599	18	0.000967794	0.000967794		6.15	4100.2	0.220453	0.220453
2019	Pingli County	18982	20	0.00105363	0.00105363		6.15	4100.2	0.216005	0.216005
2020	Pingli County	19365	4	0.000206558	0.000206558		6.15	4100.2	0.211733	0.211733
2021	Pingli County	4943	4	0.000809225	0.000809225		6.15	4100.2	0.829497	0.829497
2012	Zhenping County	4948	4	0.000808407	0.000808407		2.35	1566.74	0.316642	0.316642
2013	Zhenping County	4966	4	0.000805477	0.000805477		2.35	1566.74	0.315494	0.315494
2014	Zhenping County	4965	4	0.000805639	0.000805639		2.35	1566.74	0.315558	0.315558
2015	Zhenping County	4981	5	0.00100381	0.00100381		2.35	1566.74	0.314544	0.314544
2016	Zhenping County	4933	5	0.00101358	0.00101358		2.35	1566.74	0.317605	0.317605
2017	Zhenping County	4926	5	0.00101502	0.00101502		2.35	1566.74	0.318056	0.318056
2018	Zhenping County	4955	5	0.00100908	0.00100908		2.35	1566.74	0.316195	0.316195
2019	Zhenping County	4984	5	0.00100321	0.00100321		2.35	1566.74	0.314355	0.314355
2020	Zhenping County	5013	19	0.00379015	0.00379015		2.35	1566.74	0.312536	0.312536
2021	Zhenping County	36208	12	0.000331418	0.000331418		2.35	1566.74	0.0432707	0.0432707
2012	Baihe County	13895	13	0.000935588	0.000935588		2.51	1673.42	0.120433	0.120433
2013	Baihe County	13885	13	0.000936262	0.000936262		2.51	1673.42	0.12052	0.12052
2014	Baihe County	14097	14	0.000993119	0.000993119		2.51	1673.42	0.118707	0.118707
2015	Baihe County	14097	14	0.000993119	0.000993119		2.51	1673.42	0.118707	0.118707
2016	Baihe County	14096	14	0.00099319	0.00099319		2.51	1673.42	0.118716	0.118716
2017	Baihe County	14097	15	0.00106406	0.00106406		2.51	1673.42	0.118707	0.118707
2018	Baihe County	14154	16	0.00113042	0.00113042		2.51	1673.42	0.118229	0.118229
2019	Baihe County	14211	17	0.00119626	0.00119626		2.51	1673.42	0.117755	0.117755
2020	Baihe County	14268	14	0.000981217	0.000981217		2.51	1673.42	0.117285	0.117285
2021	Baihe County	21578	15	0.000695152	0.000695152		2.51	1673.42	0.077552	0.077552
2012	Shangzhou District	21378	16	0.000748433	0.000748433		7.92	5280.26	0.246995	0.246995
2013	Shangzhou District	21230	17	0.000800754	0.000800754		7.92	5280.26	0.248717	0.248717
2014	Shangzhou District	20972	17	0.000810605	0.000810605		7.92	5280.26	0.251777	0.251777
2015	Shangzhou District	20967	10	0.00047694	0.00047694		7.92	5280.26	0.251837	0.251837
2016	Shangzhou District	21112	10	0.000473664	0.000473664		7.92	5280.26	0.250107	0.250107
2017	Shangzhou District	21344	10	0.000468516	0.000468516		7.92	5280.26	0.247389	0.247389
2018	Shangzhou District	21448	10	0.000466244	0.000466244		7.92	5280.26	0.246189	0.246189
2019	Shangzhou District	21552	10	0.000463994	0.000463994		7.92	5280.26	0.245001	0.245001
2020	Shangzhou District	21656	14	0.000646472	0.000646472		7.92	5280.26	0.243825	0.243825
2021	Shangzhou District	31457	15	0.000476841	0.000476841		7.92	5280.26	0.167857	0.167857
2012	Luonan County	31671	16	0.000505194	0.000505194		22.42	14947.4	0.471959	0.471959
2013	Luonan County	31794	17	0.000534692	0.000534692		22.42	14947.4	0.470133	0.470133
2014	Luonan County	31892	18	0.000564405	0.000564405		22.42	14947.4	0.468689	0.468689
2015	Luonan County	31974	15	0.000469131	0.000469131		22.42	14947.4	0.467487	0.467487
2016	Luonan County	32018	15	0.000468486	0.000468486		22.42	14947.4	0.466844	0.466844
2017	Luonan County	32140	15	0.000466708	0.000466708		22.42	14947.4	0.465072	0.465072
2018	Luonan County	32260	16	0.00049597	0.00049597		22.42	14947.4	0.463342	0.463342
2019	Luonan County	32380	17	0.000525015	0.000525015		22.42	14947.4	0.461625	0.461625
2020	Luonan County	32500	6	0.000184615	0.000184615		22.42	14947.4	0.45992	0.45992
2021	Luonan County	12307	17	0.00138133	0.00138133		22.42	14947.4	1.21455	1.21455
2012	Shanyang County	24001	18	0.000749969	0.000749969		5.81	3873.53	0.16139	0.16139
2013	Shanyang County	24003	19	0.000791568	0.000791568		5.81	3873.53	0.161377	0.161377
2014	Shanyang County	23992	19	0.000791931	0.000791931		5.81	3873.53	0.161451	0.161451
2015	Shanyang County	23975	12	0.000500521	0.000500521		5.81	3873.53	0.161565	0.161565
2016	Shanyang County	23971	12	0.000500605	0.000500605		5.81	3873.53	0.161592	0.161592
2017	Shanyang County	23964	12	0.000500751	0.000500751		5.81	3873.53	0.161639	0.161639
2018	Shanyang County	23964	12	0.000500751	0.000500751		5.81	3873.53	0.161639	0.161639
2019	Shanyang County	23964	12	0.000500751	0.000500751		5.81	3873.53	0.161639	0.161639
2020	Shanyang County	23964	13	0.00054248	0.00054248		5.81	3873.53	0.161639	0.161639
2021	Shanyang County	21569	6	0.000278177	0.000278177		5.81	3873.53	0.179588	0.179588
2012	Danfeng County	12185	6	0.000492409	0.000492409		3.73	2486.79	0.204086	0.204086
2013	Danfeng County	12163	9	0.000739949	0.000739949		3.73	2486.79	0.204455	0.204455
2014	Danfeng County	12163	9	0.000739949	0.000739949		3.73	2486.79	0.204455	0.204455
2015	Danfeng County	12090	5	0.000413565	0.000413565		3.73	2486.79	0.20569	0.20569
2016	Danfeng County	12118	5	0.000412609	0.000412609		3.73	2486.79	0.205215	0.205215
2017	Danfeng County	12059	5	0.000414628	0.000414628		3.73	2486.79	0.206219	0.206219
2018	Danfeng County	12054	5	0.0004148	0.0004148		3.73	2486.79	0.206304	0.206304
2019	Danfeng County	12049	5	0.000414972	0.000414972		3.73	2486.79	0.20639	0.20639
2020	Danfeng County	12044	6	0.000498173	0.000498173		3.73	2486.79	0.206476	0.206476
2021	Danfeng County	14201	7	0.000492923	0.000492923		3.73	2486.79	0.175114	0.175114
2012	Shangnan County	14153	8	0.000565251	0.000565251		5.53	3686.85	0.2605	0.2605
2013	Shangnan County	14138	10	0.000707314	0.000707314		5.53	3686.85	0.260776	0.260776
2014	Shangnan County	14126	10	0.000707914	0.000707914		5.53	3686.85	0.260998	0.260998
2015	Shangnan County	14038	8	0.000569882	0.000569882		5.53	3686.85	0.262634	0.262634
2016	Shangnan County	14080	8	0.000568182	0.000568182		5.53	3686.85	0.26185	0.26185
2017	Shangnan County	14123	8	0.000566452	0.000566452		5.53	3686.85	0.261053	0.261053
2018	Shangnan County	14095	8	0.000567577	0.000567577		5.53	3686.85	0.261572	0.261572
2019	Shangnan County	14067	8	0.000568707	0.000568707		5.53	3686.85	0.262092	0.262092
2020	Shangnan County	14039	16	0.00113968	0.00113968		5.53	3686.85	0.262615	0.262615
2021	Shangnan County	24006	13	0.000541531	0.000541531		5.53	3686.85	0.15358	0.15358
2012	Zhen’an County	21559	13	0.000602996	0.000602996		13.26	8840.44	0.410058	0.410058
2013	Zhen’an County	21586	15	0.000694895	0.000694895		13.26	8840.44	0.409545	0.409545
2014	Zhen’an County	21961	15	0.000683029	0.000683029		13.26	8840.44	0.402552	0.402552
2015	Zhen’an County	21899	12	0.00054797	0.00054797		13.26	8840.44	0.403692	0.403692
2016	Zhen’an County	21746	13	0.000597811	0.000597811		13.26	8840.44	0.406532	0.406532
2017	Zhen’an County	21667	13	0.000599991	0.000599991		13.26	8840.44	0.408014	0.408014
2018	Zhen’an County	21441	13	0.000606315	0.000606315		13.26	8840.44	0.412315	0.412315
2019	Zhen’an County	21215	13	0.000612774	0.000612774		13.26	8840.44	0.416707	0.416707
2020	Zhen’an County	20989	7	0.000333508	0.000333508		13.26	8840.44	0.421194	0.421194
2021	Zhen’an County	8481	7	0.000825374	0.000825374		13.26	8840.44	1.04238	1.04238
2012	Zhashui County	8481	7	0.000825374	0.000825374		2.39	1593.41	0.18788	0.18788
2013	Zhashui County	8481	7	0.000825374	0.000825374		2.39	1593.41	0.18788	0.18788
2014	Zhashui County	8481	7	0.000825374	0.000825374		2.39	1593.41	0.18788	0.18788
2015	Zhashui County	8667	5	0.000576901	0.000576901		2.39	1593.41	0.183848	0.183848
2016	Zhashui County	8684	5	0.000575772	0.000575772		2.39	1593.41	0.183488	0.183488
2017	Zhashui County	8691	5	0.000575308	0.000575308		2.39	1593.41	0.183341	0.183341
2018	Zhashui County	8692	5	0.000575242	0.000575242		2.39	1593.41	0.183319	0.183319
2019	Zhashui County	8693	5	0.000575175	0.000575175		2.39	1593.41	0.183298	0.183298
2020	Zhashui County	8694	5	0.000575109	0.000575109		2.39	1593.41	0.183277	0.183277
2021	Zhashui County	8695	5	0.000575043	0.000575043		2.39	1593.41	0.183256	0.183256
