# Supplementary material
Source: Research Square preprint supplement (doi:10.21203/rs.3.rs-8699542/v1)
Supplement: Supplementary file 3 [file 99cdc05df7003e92490fb4c7.xlsx]

## Sheet: Raw Data
year	xian	Sown Area of Grain Crops / 1000 hectares	Per Capita Disposable Income of Urban Residents (yuan)	Per Capita Disposable Income of Rural Residents (yuan)
2012	Baqiao District	13.8067	28688	13278
2013	Baqiao District	13.2134	31952	15203
2014	Baqiao District	12.0734	35147	16982
2015	Baqiao District	11.5801	34236	18891
2016	Baqiao District	10.6867	36784	20431
2017	Baqiao District	10.339
2018	Baqiao District	5.42669
2019	Baqiao District	4.71336
2020	Baqiao District	4.52002
2021	Baqiao District
2012	Yanliang District	12.9601	31026	13403
2013	Yanliang District	14.2467	34375	15212
2014	Yanliang District	14.1667	37503	17007
2015	Yanliang District	14.2734	34382	18850
2016	Yanliang District	13.9667	36931	20262
2017	Yanliang District	14.019
2018	Yanliang District	18.5134
2019	Yanliang District	17.9001
2020	Yanliang District	18.0001
2021	Yanliang District
2012	Lintong District	74.8404	24568	10685
2013	Lintong District	70.807	27318	12160
2014	Lintong District	68.987	29804	13595
2015	Lintong District	66.8337	28628	15164
2016	Lintong District	65.467	30753	16389
2017	Lintong District	63.695
2018	Lintong District	66.867
2019	Lintong District	66.7403
2020	Lintong District	66.807
2021	Lintong District
2012	Chang’an District		26493	11107
2013	Chang’an District	73.7769	29460	12695
2014	Chang’an District	69.995	32377	14206
2015	Chang’an District	6.72336	32204	15486
2016	Chang’an District	65.5461	34627	16741
2017	Chang’an District	53.2133
2018	Chang’an District	30.9421
2019	Chang’an District	26.3732
2020	Chang’an District	27.4649
2021	Chang’an District	28.1541
2012	Lantian County	65.707	19957	7824
2013	Lantian County	64.0937	21953	8833
2014	Lantian County	63.8337	23907	9911
2015	Lantian County	63.2403	24509	11084
2016	Lantian County	62.887	26321	12082
2017	Lantian County	62.208
2018	Lantian County	40.3002
2019	Lantian County	40.2135
2020	Lantian County
2021	Lantian County
2012	Zhouzhi County	52.0536	20025	7733
2013	Zhouzhi County	52.6803	22243	8870
2014	Zhouzhi County	51.3403	24445	9961
2015	Zhouzhi County	49.8469	25070	11148
2016	Zhouzhi County	48.6602	26899	12207
2017	Zhouzhi County	45.097
2018	Zhouzhi County	25.5468
2019	Zhouzhi County	25.5001
2020	Zhouzhi County	25.3268
2021	Zhouzhi County
2012	Gaoling District		23462	10673
2013	Gaoling District		26030	12167
2014	Gaoling District		28581	13615
2015	Gaoling District		27423	15191
2016	Gaoling District	26648.9	29464	16431
2017	Gaoling District	25532.2
2018	Gaoling District
2019	Gaoling District
2020	Gaoling District
2021	Gaoling District
2012	Huyi District		22520	9654
2013	Huyi District		24817	10899
2014	Huyi District		27026	12218
2015	Huyi District		26043	13616
2016	Huyi District		27970	14638
2017	Huyi District	26.912
2018	Huyi District	36.4802
2019	Huyi District	37.2069
2020	Huyi District	31.3735
2021	Huyi District
2012	Chencang District	58.41	25971	8678
2013	Chencang District	58.895	28698	9850
2014	Chencang District	58.118	31797	11081
2015	Chencang District	58.102	28881	9823
2016	Chencang District	57.437	31105	10638
2017	Chencang District	57.425
2018	Chencang District	50.892
2019	Chencang District	50.799
2020	Chencang District
2021	Chencang District
2012	Mei County	24.89	26817	8313
2013	Mei County	23.401	29874	9527
2014	Mei County	22.594	32981	10755
2015	Mei County	22.308	30127	9590
2016	Mei County	21.566	32417	10386
2017	Mei County	21.28
2018	Mei County	13.112
2019	Mei County	13.087
2020	Mei County
2021	Mei County
2012	Fufeng County	47.89	24205	7565
2013	Fufeng County	48.471	26892	8647
2014	Fufeng County	48.427	29608	9736
2015	Fufeng County	48.484	27125	8646
2016	Fufeng County	47.899	29186	9363
2017	Fufeng County	47.916
2018	Fufeng County	45.264
2019	Fufeng County	45.184
2020	Fufeng County
2021	Fufeng County
2012	Fengxiang District	55.873	26630	9159
2013	Fengxiang District	56.132	29426	10423
2014	Fengxiang District	55.271	32428	11716
2015	Fengxiang District	55.007	29426	10375
2016	Fengxiang District	54.341	31662	11225
2017	Fengxiang District	54.301
2018	Fengxiang District	55.357
2019	Fengxiang District	55.266
2020	Fengxiang District
2021	Fengxiang District
2012	Qishan County	47.793	26242	9153
2013	Qishan County	48.626	29050	10435
2014	Qishan County	48.292	32100	11791
2015	Qishan County	48.201	29212	10483
2016	Qishan County	47.593	31461	11343
2017	Qishan County	47.526
2018	Qishan County	40.684
2019	Qishan County	40.612
2020	Qishan County
2021	Qishan County
2012	Long County	33.622	20630	6740
2013	Long County	33.922	23002	7644
2014	Long County	32.679	25464	8568
2015	Long County	32.73	24179	7581
2016	Long County	32.269	26089	8226
2017	Long County	31.944
2018	Long County
2019	Long County	32.719
2020	Long County
2021	Long County
2012	Qianyang County	19.845	22525	7007
2013	Qianyang County	19.506	25070	7938
2014	Qianyang County	19.004	27703	8955
2015	Qianyang County	18.559	26341	7915
2016	Qianyang County	18.238	28369	8572
2017	Qianyang County	17.867
2018	Qianyang County	18.271
2019	Qianyang County	17.536
2020	Qianyang County
2021	Qianyang County
2012	Weibin District	7.825	26465	10208
2013	Weibin District	7.638	29323	11596
2014	Weibin District	7.385	32519	13069
2015	Weibin District	6.704	31598	11587
2016	Weibin District	5.509	34031	12514
2017	Weibin District	4.768
2018	Weibin District	3.924
2019	Weibin District	3.553
2020	Weibin District
2021	Weibin District
2012	Jintai District	11.96	25473	9290
2013	Jintai District	11.795	28224	10581
2014	Jintai District	11.684	31329	11883
2015	Jintai District	11.566	30485	10523
2016	Jintai District	11.415	32832	11365
2017	Jintai District	11.206
2018	Jintai District	11.353
2019	Jintai District	11.041
2020	Jintai District
2021	Jintai District
2012	Jingyang County	51.746	26513	8379
2013	Jingyang County	51.531	29270	9561
2014	Jingyang County	50.815	32431	10794
2015	Jingyang County	50.469	29458	10106
2016	Jingyang County	50.1	31730	10940
2017	Jingyang County	34.416
2018	Jingyang County	33.443
2019	Jingyang County	33.384
2020	Jingyang County	33.4202
2021	Jingyang County
2012	Sanyuan County	42.11	26619	8383
2013	Sanyuan County	42.064	29387	9607
2014	Sanyuan County	40.834	32561	10846
2015	Sanyuan County	40.508	29570	10135
2016	Sanyuan County	40.192	31851	10961
2017	Sanyuan County	39.816
2018	Sanyuan County	38.007
2019	Sanyuan County	37.938
2020	Sanyuan County
2021	Sanyuan County
2012	Liquan County	27.37	25048	8381
2013	Liquan County	27.41	27628	9571
2014	Liquan County	26.865	30584	10796
2015	Liquan County	26.613	27755	10089
2016	Liquan County	26.336	29818	10922
2017	Liquan County	26.036
2018	Liquan County	25.51
2019	Liquan County	25.333
2020	Liquan County
2021	Liquan County
2012	Qindu District	14.178	28798	9355
2013	Qindu District	13.549	32081	10787
2014	Qindu District	13.101	35738	12211
2015	Qindu District	12.895	32498	11398
2016	Qindu District	12.07	34983	12321
2017	Qindu District	6.365
2018	Qindu District	4.981
2019	Qindu District	4.328
2020	Qindu District
2021	Qindu District
2012	Weicheng District	21.886	28694	9218
2013	Weicheng District	21.279	31936	10582
2014	Weicheng District	20.663	35545	11979
2015	Weicheng District	20.309	32316	11183
2016	Weicheng District	19.123	34621	12053
2017	Weicheng District
2018	Weicheng District
2019	Weicheng District
2020	Weicheng District
2021	Weicheng District
2012	Qian County	55.967	24915	8314
2013	Qian County	55.853	27481	9495
2014	Qian County	54.853	30421	10700
2015	Qian County	54.519	27620	10007
2016	Qian County	54.181	29673	10773
2017	Qian County	53.82
2018	Qian County	54.404
2019	Qian County	54.264
2020	Qian County
2021	Qian County
2012	Wugong County	41.065	24142	8167
2013	Wugong County	40.494	26677	9335
2014	Wugong County	39.655	29585	10521
2015	Wugong County	39.43	26865	9857
2016	Wugong County	39.138	28808	10660
2017	Wugong County	38.87
2018	Wugong County	38.482
2019	Wugong County	38.409
2020	Wugong County
2021	Wugong County
2012	Xingping City	43.576	27246	8437
2013	Xingping City	44.26	30216	9677
2014	Xingping City	43.151	33600	10936
2015	Xingping City	42.946	30542	10232
2016	Xingping City	42.647	32782	11067
2017	Xingping City	38.655
2018	Xingping City	36.448
2019	Xingping City	36.386
2020	Xingping City	36.3828
2021	Xingping City
2012	Tongguan County	13.311	21089	6388
2013	Tongguan County	13.294	23346	7391
2014	Tongguan County	13.18	26101	8381
2015	Tongguan County	13.361	23911	8368
2016	Tongguan County	13.421	25693	9063
2017	Tongguan County	13.456
2018	Tongguan County	13.174
2019	Tongguan County	13.09
2020	Tongguan County	13.2397
2021	Tongguan County
2012	Huazhou District		22438	6505
2013	Huazhou District		24749	7487
2014	Huazhou District		27348	8438
2015	Huazhou District		25140	8430
2016	Huazhou District	27.811	26963	9088
2017	Huazhou District	27.925
2018	Huazhou District
2019	Huazhou District	32.066
2020	Huazhou District	31.8507
2021	Huazhou District
2012	Huayin City		21668	6402
2013	Huayin City		24246	7325
2014	Huayin City		26719	8241
2015	Huayin City		24611	8236
2016	Huayin City		26567	8862
2017	Huayin City
2018	Huayin City
2019	Huayin City
2020	Huayin City	24.9867
2021	Huayin City
2012	Linwei District	88.187	23280	6887
2013	Linwei District	85.894	26143	7870
2014	Linwei District	83.581	29149	8940
2015	Linwei District	82.967	26897	9045
2016	Linwei District	81.819	29092	9805
2017	Linwei District	81.452
2018	Linwei District	83.892
2019	Linwei District	68.223
2020	Linwei District	83.764
2021	Linwei District
2012	Dali County	63.396	21200	7051
2013	Dali County	63.373	23596	8070
2014	Dali County	62.274	26168	9184
2015	Dali County	62.212	24264	9306
2016	Dali County	61.316	26193	10106
2017	Dali County	61.545
2018	Dali County	63.52
2019	Dali County	63.413
2020	Dali County	63.5037
2021	Dali County
2012	Pucheng County	85.172	22342	6603
2013	Pucheng County	84.684	24800	7615
2014	Pucheng County	83.783	27677	8590
2015	Pucheng County	83.641	25476	8557
2016	Pucheng County	82.76	27476	9250
2017	Pucheng County	82.154
2018	Pucheng County	87.944
2019	Pucheng County	87.79
2020	Pucheng County	87.8648
2021	Pucheng County
2012	Fuping County	81.826	22015	6551
2013	Fuping County	81.366	24591	7514
2014	Fuping County	80.181	27321	8476
2015	Fuping County	80.557	25417	8515
2016	Fuping County	79.968	27468	9171
2017	Fuping County	79.535
2018	Fuping County	82.48
2019	Fuping County	82.331
2020	Fuping County	82.3627
2021	Fuping County
2012	Shenmu City		29316	12537
2013	Shenmu City		30100	13225
2014	Shenmu City		32610	13622
2015	Shenmu City		28450	12046
2016	Shenmu City		30384	12875
2017	Shenmu City	32.376
2018	Shenmu City	64.369
2019	Shenmu City	67.644
2020	Shenmu City	67.061
2021	Shenmu City
2012	Yuyang District	43.945	26071	10001
2013	Yuyang District	44.21	29069	11331
2014	Yuyang District	44.691	32217	12656
2015	Yuyang District	44.696	29110	11015
2016	Yuyang District	44.773	31206	11929
2017	Yuyang District	45.711
2018	Yuyang District	78.22
2019	Yuyang District	78.118
2020	Yuyang District	76.993
2021	Yuyang District
2012	Hengshan District		23920	7860
2013	Hengshan District		26527	8725
2014	Hengshan District		29021	9364
2015	Hengshan District		25905	9760
2016	Hengshan District		27951	10522
2017	Hengshan District	63.426
2018	Hengshan District	71.68
2019	Hengshan District
2020	Hengshan District	73.107
2021	Hengshan District	71.906
2012	Jingbian County	51.363	28652	11413
2013	Jingbian County	51.675	30085	12680
2014	Jingbian County	51.863	33205	13086
2015	Jingbian County	49.713	29577	11058
2016	Jingbian County	49.44	31558	11910
2017	Jingbian County	53.448
2018	Jingbian County	69.374
2019	Jingbian County	69.343
2020	Jingbian County	68.363
2021	Jingbian County
2012	Dingbian County	110.226	25271	9492
2013	Dingbian County	110.899	28152	10744
2014	Dingbian County	111.142	30911	11829
2015	Dingbian County	110.857	28895	10926
2016	Dingbian County	110.652	30885	11789
2017	Dingbian County	110.842
2018	Dingbian County	165.68
2019	Dingbian County	165.427
2020	Dingbian County	163.196
2021	Dingbian County
2012	Fugu County	30.667	29083	11783
2013	Fugu County	30.762	30392	13001
2014	Fugu County	30.716	32732	13409
2015	Fugu County	30.321	28417	10871
2016	Fugu County	29.961	30321	11610
2017	Fugu County	28.941
2018	Fugu County	30.194
2019	Fugu County	29.206
2020	Fugu County	28.989
2021	Fugu County
2012	Jia County	24.562	21412	6408
2013	Jia County	24.734	23810	7254
2014	Jia County	24.908	26405	8162
2015	Jia County	24.265	23484	8174
2016	Jia County	25.685	25668	8893
2017	Jia County	25.277
2018	Jia County	57.266
2019	Jia County	57.426
2020	Jia County	56.963
2021	Jia County
2012	Wubu County	5.497	21992	6558
2013	Wubu County	5.537	24367	7352
2014	Wubu County	5.576	26904	8242
2015	Wubu County	5.991	23516	8155
2016	Wubu County	6.891	25656	8881
2017	Wubu County	6.782
2018	Wubu County	12.169
2019	Wubu County	12.19
2020	Wubu County	12.088
2021	Wubu County
2012	Mizhi County	26.406	23178	7509
2013	Mizhi County	26.587	25681	8290
2014	Mizhi County	26.783	27710	8903
2015	Mizhi County	28.837	24667	8894
2016	Mizhi County	29.832	26813	9658
2017	Mizhi County	29.513
2018	Mizhi County	34.501
2019	Mizhi County	35.308
2020	Mizhi County	34.988
2021	Mizhi County
2012	Suide County	25.486	22708	6630
2013	Suide County	25.661	25138	7326
2014	Suide County	25.854	27426	8227
2015	Suide County	27.974	24664	8240
2016	Suide County	28.05	26760	8949
2017	Suide County	27.757
2018	Suide County	53.061
2019	Suide County	53.209
2020	Suide County	52.788
2021	Suide County
2012	Zizhou County	31.763	21967	6582
2013	Zizhou County	32.057	24406	7394
2014	Zizhou County	32.251	26822	8296
2015	Zizhou County	33.103	23598	8322
2016	Zizhou County	33.785	25768	9046
2017	Zizhou County	33.382
2018	Zizhou County	54.749
2019	Zizhou County	52.92
2020	Zizhou County	52.444
2021	Zizhou County
2012	Qingjian County	28.059	21675	6500
2013	Qingjian County	28.237	24124	7352
2014	Qingjian County	28.44	26705	8234
2015	Qingjian County	30.233	23529	8234
2016	Qingjian County	31.328	25459	8918
2017	Qingjian County	30.764
2018	Qingjian County	34.689
2019	Qingjian County	34.786
2020	Qingjian County	34.509
2021	Qingjian County
2012	Baota District		25520	7483
2013	Baota District		28378	8493
2014	Baota District		31358	9529
2015	Baota District		29777	9090
2016	Baota District		32039	9835
2017	Baota District
2018	Baota District
2019	Baota District
2020	Baota District	18.255
2021	Baota District	18.322
2012	Zichang City	25.802	26387	7357
2013	Zichang City	25.412	29395	8357
2014	Zichang City	25.475	32570	9335
2015	Zichang City	25.611	28679	9021
2016	Zichang City	25.625	30772	9752
2017	Zichang City	25.628
2018	Zichang City	10.881
2019	Zichang City
2020	Zichang City
2021	Zichang City
2012	Yanchuan County	16.966	20961	5815
2013	Yanchuan County	16.966	23497	6530
2014	Yanchuan County	16.966	26089	7634
2015	Yanchuan County	16.966	26212	8354
2016	Yanchuan County	16.966	28072	9063
2017	Yanchuan County	16.966
2018	Yanchuan County	5.574
2019	Yanchuan County	10.935
2020	Yanchuan County	11.0601
2021	Yanchuan County
2012	Yanchang County	10.03	22529	6282
2013	Yanchang County	10.329	25007	7124
2014	Yanchang County	10.423	27615	8007
2015	Yanchang County	10.654	27076	8671
2016	Yanchang County	10.806	29106	9286
2017	Yanchang County	10.821
2018	Yanchang County	15.398
2019	Yanchang County	5.76
2020	Yanchang County	5.85336
2021	Yanchang County
2012	Ansai District	33.87	26680	8046
2013	Ansai District		29695	9148
2014	Ansai District		32852	10374
2015	Ansai District		29801	10437
2016	Ansai District		31946	11271
2017	Ansai District
2018	Ansai District
2019	Ansai District
2020	Ansai District
2021	Ansai District
2012	Zhidan County	17.574	26670	7872
2013	Zhidan County	17.993	30004	8872
2014	Zhidan County	18.2	33403	10001
2015	Zhidan County	18.74	29547	9971
2016	Zhidan County	19.814	31585	10688
2017	Zhidan County	19.82
2018	Zhidan County	18.553
2019	Zhidan County	18.659
2020	Zhidan County
2021	Zhidan County
2012	Wuqi County		26744	8005
2013	Wuqi County	16.794	29873	9110
2014	Wuqi County		33198	10358
2015	Wuqi County		30168	10302
2016	Wuqi County		32218	11064
2017	Wuqi County
2018	Wuqi County
2019	Wuqi County
2020	Wuqi County
2021	Wuqi County	17.982
2012	Ganquan County	8.994	23108	7689
2013	Ganquan County	9.266	25835	8642
2014	Ganquan County	9.409	28607	9662
2015	Ganquan County	9.659	27291	9778
2016	Ganquan County	9.514	29419	10462
2017	Ganquan County	9.511
2018	Ganquan County	7.445
2019	Ganquan County	7.711
2020	Ganquan County
2021	Ganquan County
2012	Luochuan County	12.622	23294	9278
2013	Luochuan County	12.884	26136	10410
2014	Luochuan County	12.815	28993	11742
2015	Luochuan County	12.856	28086	10785
2016	Luochuan County	12.827	29967	11713
2017	Luochuan County	12.754
2018	Luochuan County	11.838
2019	Luochuan County	11.938
2020	Luochuan County
2021	Luochuan County
2012	Fu County	6.254	21647	8084
2013	Fu County		24331	9086
2014	Fu County	6.241	27136	10313
2015	Fu County	6.312	26552	10282
2016	Fu County	6.448	28649	11134
2017	Fu County	6.286
2018	Fu County	5.647
2019	Fu County	5.733
2020	Fu County
2021	Fu County
2012	Huangling County	10.354	24479	8974
2013	Huangling County	10.431	27392	10096
2014	Huangling County	10.345	30213	11267
2015	Huangling County	10.067	27784	10581
2016	Huangling County	10.002	29922	11405
2017	Huangling County	9.894
2018	Huangling County	7.819
2019	Huangling County	7.952
2020	Huangling County
2021	Huangling County
2012	Huanglong County	10.202	17671	6766
2013	Huanglong County	11.004	19721	7585
2014	Huanglong County	11.197	21975	8503
2015	Huanglong County	11.242	24889	8958
2016	Huanglong County	10.587	26879	9710
2017	Huanglong County	9.477
2018	Huanglong County	8.829
2019	Huanglong County	8.959
2020	Huanglong County
2021	Huanglong County
2012	Yichuan County	6.786	22972	7565
2013	Yichuan County	6.804	25867	8496
2014	Yichuan County	6.784	28772	9626
2015	Yichuan County	6.748	27237	9644
2016	Yichuan County	6.77	29252	10376
2017	Yichuan County	6.729
2018	Yichuan County	4.185
2019	Yichuan County	4.206
2020	Yichuan County
2021	Yichuan County
2012	Yijun County	16.186	20922	6477
2013	Yijun County	15.96	23516	7423
2014	Yijun County	15.962	26246	8417
2015	Yijun County	17.624	22949	7888
2016	Yijun County	18.1	24751	8547
2017	Yijun County	18.414
2018	Yijun County	26.195
2019	Yijun County	26.622
2020	Yijun County	26.6237
2021	Yijun County
2012	Yaozhou District	29.311	25358	7975
2013	Yaozhou District	29.796	28528	9099
2014	Yaozhou District	29.921	31894	10227
2015	Yaozhou District	29.798	28150	9386
2016	Yaozhou District	30.3	30436	10181
2017	Yaozhou District	30.457
2018	Yaozhou District	25.643
2019	Yaozhou District	25.432
2020	Yaozhou District
2021	Yaozhou District
2012	Wangyi District	3.79	22218	8068
2013	Wangyi District	3.803	24995	9189
2014	Wangyi District	3.823	27992	10398
2015	Wangyi District	3.853	25013	8499
2016	Wangyi District	3.861	27053	9201
2017	Wangyi District	3.857
2018	Wangyi District	3.45
2019	Wangyi District	3.361
2020	Wangyi District
2021	Wangyi District
2012	Yintai District	9.991	21325	6863
2013	Yintai District	10.205	23778	7879
2014	Yintai District	10.351	26348	8934
2015	Yintai District	10.395	23654	8175
2016	Yintai District	10.407	25464	8919
2017	Yintai District	10.595
2018	Yintai District	11.192
2019	Yintai District	10.574
2020	Yintai District
2021	Yintai District
2012	Baishui County	28.238	20922	6242
2013	Baishui County	28.059	23202	7215
2014	Baishui County	27.516	25824	8218
2015	Baishui County	27.874	23923	8314
2016	Baishui County	27.999	25754	9046
2017	Baishui County	28.224
2018	Baishui County	24.728
2019	Baishui County	24.722
2020	Baishui County	24.9527
2021	Baishui County
2012	Chengcheng County	43.71	22079	5938
2013	Chengcheng County	43.574	24750	6800
2014	Chengcheng County	43.397	27374	7691
2015	Chengcheng County	43.396	25219	7687
2016	Chengcheng County	43.337	27124	8302
2017	Chengcheng County	42.938
2018	Chengcheng County	41.121
2019	Chengcheng County	41.061
2020	Chengcheng County	41.1613
2021	Chengcheng County
2012	Hancheng City	23.47	24717	8852
2013	Hancheng City	23.36	27312	10179
2014	Hancheng City	22.95	30071	11400
2015	Hancheng City	21.37	27504	11429
2016	Hancheng City	21.29	29784	12400
2017	Hancheng City	19.94
2018	Hancheng City	14.29
2019	Hancheng City	14.25
2020	Hancheng City	14.4555
2021	Hancheng City
2012	Heyang County	50.755	20784	5912
2013	Heyang County	50.709	23133	6785
2014	Heyang County	50.459	25563	7620
2015	Heyang County	49.596	23749	7646
2016	Heyang County	50.098	25495	8311
2017	Heyang County	50.164
2018	Heyang County	50.604
2019	Heyang County	50.504
2020	Heyang County	50.8029
2021	Heyang County
2012	Xunyi County	20.973	21403	6662
2013	Xunyi County	20.602	23715	7701
2014	Xunyi County	20.216	26229	8741
2015	Xunyi County	20.14	23789	8208
2016	Xunyi County	20.704	25719	8951
2017	Xunyi County	20.167
2018	Xunyi County	19.673
2019	Xunyi County	20.06
2020	Xunyi County
2021	Xunyi County
2012	Changwu County	12.066	22021	6622
2013	Changwu County	12.144	24399	7556
2014	Changwu County	12.016	26936	8508
2015	Changwu County	11.983	24420	7987
2016	Changwu County	12.215	26401	8702
2017	Changwu County	12.279
2018	Changwu County	12.081
2019	Changwu County	12.124
2020	Changwu County
2021	Changwu County
2012	Yongshou County	18.623	21256	6391
2013	Yongshou County	19.134	23530	7317
2014	Yongshou County	18.939	26024	8232
2015	Yongshou County	18.915	23577	7720
2016	Yongshou County	19.271	25490	8419
2017	Yongshou County	19.197
2018	Yongshou County	19.136
2019	Yongshou County	19.19
2020	Yongshou County
2021	Yongshou County
2012	Binzhou City		25217	7835
2013	Binzhou City		28041	9058
2014	Binzhou City		31126	10271
2015	Binzhou City		28277	9640
2016	Binzhou City		30515	10453
2017	Binzhou City
2018	Binzhou City	26.618
2019	Binzhou City	26.406
2020	Binzhou City	26.461
2021	Binzhou City
2012	Chunhua County	17.24	20173	6572
2013	Chunhua County	23.553	22311	7518
2014	Chunhua County	23.24	24654	8451
2015	Chunhua County	23.148	22346	7929
2016	Chunhua County	23.679	25240	8639
2017	Chunhua County	23.637
2018	Chunhua County	23.468
2019	Chunhua County	23.657
2020	Chunhua County
2021	Chunhua County
2012	Linyou County	20.897	21215	6696
2013	Linyou County	20.999	23676	7580
2014	Linyou County	21.37	26304	8512
2015	Linyou County	22.281	25046	7518
2016	Linyou County	22.708	26974	8157
2017	Linyou County	22.485
2018	Linyou County	22.065
2019	Linyou County	22.457
2020	Linyou County
2021	Linyou County
2012	Feng County	6.336	27550	9061
2013	Feng County	5.912	30415	10402
2014	Feng County	5.982	33548	11765
2015	Feng County	6.106	30432	10236
2016	Feng County	6.118	32715	11055
2017	Feng County	5.995
2018	Feng County	6.162
2019	Feng County	6.072
2020	Feng County
2021	Feng County
2012	Taibai County	2.148	20713	6610
2013	Taibai County	2.219	23054	7476
2014	Taibai County	2.164	25497	8463
2015	Taibai County	2.188	24295	7540
2016	Taibai County	2.111	26214	8181
2017	Taibai County	2.051
2018	Taibai County	1.973
2019	Taibai County	1.923
2020	Taibai County	1.92534
2021	Taibai County
2012	Lueyang County	20.267	19930	5654
2013	Lueyang County	20.294	22270	6468
2014	Lueyang County	20.243	24675	7276
2015	Lueyang County	20.314	23357	8043
2016	Lueyang County	20.169	25282	8714
2017	Lueyang County	20.1676
2018	Lueyang County	17.2714
2019	Lueyang County	17.275
2020	Lueyang County	17.3523
2021	Lueyang County
2012	Ningqiang County	30.898	20018	5754
2013	Ningqiang County	30.938	22489	6548
2014	Ningqiang County	30.818	24985	7373
2015	Ningqiang County	30.84	23602	8068
2016	Ningqiang County	30.784	25599	8746
2017	Ningqiang County	30.8464
2018	Ningqiang County	27.1021
2019	Ningqiang County	27.144
2020	Ningqiang County	27.2225
2021	Ningqiang County
2012	Foping County	2.803	18911	5473
2013	Foping County	2.804	21309	6272
2014	Foping County	2.794	23674	7050
2015	Foping County	2.801	23257	8030
2016	Foping County	2.795	25094	8745
2017	Foping County	2.80335
2018	Foping County	2.63608
2019	Foping County	2.639
2020	Foping County	2.66681
2021	Foping County
2012	Liuba County	3.191	18948	5471
2013	Liuba County	3.191	21325	6231
2014	Liuba County	3.18	23649	7047
2015	Liuba County	3.182	23242	8015
2016	Liuba County	3.162	25125	8712
2017	Liuba County	3.17142
2018	Liuba County	2.67935
2019	Liuba County	2.683
2020	Liuba County	2.70708
2021	Liuba County
2012	Xixiang County	30.076	20068	5788
2013	Xixiang County	30.112	22405	6662
2014	Xixiang County	29.996	24914	7541
2015	Xixiang County	30.162	23612	8180
2016	Xixiang County	30.177	25605	8875
2017	Xixiang County	30.238
2018	Xixiang County	26.5522
2019	Xixiang County	26.59
2020	Xixiang County	26.6779
2021	Xixiang County
2012	Zhenba County	38.552	19096	5470
2013	Zhenba County	38.601	21495	6232
2014	Zhenba County	38.464	23924	7042
2015	Zhenba County	38.876	23348	8002
2016	Zhenba County	38.857	25216	8698
2017	Zhenba County	38.9537
2018	Zhenba County	37.7312
2019	Zhenba County	37.744
2020	Zhenba County	37.8468
2021	Zhenba County
2012	Hantai District	17.774	20966
2013	Hantai District	17.796	23450
2014	Hantai District	17.729	26030
2015	Hantai District	17.755	23832	8308
2016	Hantai District	17.423	25810	9014
2017	Hantai District	17.1759
2018	Hantai District	16.5195
2019	Hantai District	16.429
2020	Hantai District	16.4806
2021	Hantai District
2012	Mian County	30.811	20228	6642
2013	Mian County	30.852	22610	7612
2014	Mian County	30.736	25188	8556
2015	Mian County	30.465	23630	8189
2016	Mian County	30.322	25662	8910
2017	Mian County	30.0276
2018	Mian County	29.8669
2019	Mian County	29.763
2020	Mian County	29.8406
2021	Mian County
2012	Nanzheng District		20442	7228
2013	Nanzheng District		22880	8305
2014	Nanzheng District		25465	9368
2015	Nanzheng District		23661	8217
2016	Nanzheng District		25649	8910
2017	Nanzheng District	32.9424
2018	Nanzheng District	31.9223
2019	Nanzheng District	31.831
2020	Nanzheng District	31.927
2021	Nanzheng District
2012	Chenggu County	27.133	20468	7309
2013	Chenggu County	27.167	22916	8383
2014	Chenggu County	27.061	25437	9473
2015	Chenggu County	26.587	23648	8236
2016	Chenggu County	26.457	25611	8953
2017	Chenggu County	26.1663
2018	Chenggu County	28.3513
2019	Chenggu County	28.268
2020	Chenggu County	28.3409
2021	Chenggu County
2012	Yang County	33.215	19788	5755
2013	Yang County	33.26	22212	6618
2014	Yang County	33.131	24700	7419
2015	Yang County		23379	8164
2016	Yang County		25366	8882
2017	Yang County	32.6254
2018	Yang County	33.3506
2019	Yang County	33.236
2020	Yang County	33.3233
2021	Yang County
2012	Hanbin District	54.751	22115	5920
2013	Hanbin District	54.745	24835	6731
2014	Hanbin District	53.852	27890	7572
2015	Hanbin District	53.745	24332	7849
2016	Hanbin District	53.583	26389	8506
2017	Hanbin District	53.067
2018	Hanbin District	46.643
2019	Hanbin District	46.455
2020	Hanbin District	46.567
2021	Hanbin District
2012	Langao County	24.827	20483	5755
2013	Langao County	24.836	22982	6537
2014	Langao County	24.693	25786	7348
2015	Langao County	24.885	24020	7707
2016	Langao County	24.871	26003	8374
2017	Langao County	24.828
2018	Langao County	14.592
2019	Langao County	14.522
2020	Langao County	14.748
2021	Langao County
2012	Hanyin County	25.686	20228	5938
2013	Hanyin County	25.693	22676	6858
2014	Hanyin County	25.913	25420	7797
2015	Hanyin County	25.398	23995	8063
2016	Hanyin County	25.26	26000	8745
2017	Hanyin County	24.923
2018	Hanyin County	23.297
2019	Hanyin County	23.192
2020	Hanyin County	23.371
2021	Hanyin County
2012	Shiquan County	19.264	20525	5948
2013	Shiquan County	19.263	22988	6786
2014	Shiquan County	19.138	25747	7675
2015	Shiquan County	19.353	23905	8011
2016	Shiquan County	19.358	25854	8753
2017	Shiquan County	19.338
2018	Shiquan County	15.774
2019	Shiquan County	15.723
2020	Shiquan County	15.915
2021	Shiquan County
2012	Ningshan County	4.785	19733	5629
2013	Ningshan County	4.801	21785	6445
2014	Ningshan County	4.946	24116	7315
2015	Ningshan County	5.106	23338	7625
2016	Ningshan County	5.089	25358	8270
2017	Ningshan County	5.151
2018	Ningshan County	2.972
2019	Ningshan County	2.965
2020	Ningshan County	3.007
2021	Ningshan County
2012	Ziyang County	42.147	20196	5966
2013	Ziyang County	42.152	22337	6849
2014	Ziyang County	42.022	24749	7794
2015	Ziyang County	42.459	23575	8051
2016	Ziyang County	42.083	25474	8789
2017	Ziyang County	41.935
2018	Ziyang County	38.746
2019	Ziyang County	38.621
2020	Ziyang County	38.2
2021	Ziyang County
2012	Xunyang City	45.323	20617	5911
2013	Xunyang City	45.293	22741	6757
2014	Xunyang City	45.169	25174	7655
2015	Xunyang City	45.582	23907	7900
2016	Xunyang City	45.524	25810	8608
2017	Xunyang City	45.365
2018	Xunyang City	40.371
2019	Xunyang City	40.221
2020	Xunyang City	40.23
2021	Xunyang City
2012	Pingli County	24.885	20007	6247
2013	Pingli County	24.889	22408	7165
2014	Pingli County	24.771	25097	8147
2015	Pingli County	24.858	23810	8130
2016	Pingli County	24.816	25728	8859
2017	Pingli County	24.765
2018	Pingli County	17.276
2019	Pingli County	17.177
2020	Pingli County	17.553
2021	Pingli County
2012	Zhenping County	9.302	20207	5673
2013	Zhenping County	9.341	22410	6456
2014	Zhenping County	9.351	24853	7360
2015	Zhenping County	9.416	23620	7728
2016	Zhenping County	9.419	25546	8413
2017	Zhenping County	9.416
2018	Zhenping County	7.056
2019	Zhenping County	7.017
2020	Zhenping County	7.112
2021	Zhenping County
2012	Baihe County	18.905	19980	5798
2013	Baihe County	18.9	22178	6592
2014	Baihe County	18.846	24617	7416
2015	Baihe County	18.729	23432	7768
2016	Baihe County	18.706	25485	8417
2017	Baihe County	18.683
2018	Baihe County	17.397
2019	Baihe County	17.329
2020	Baihe County	17.513
2021	Baihe County
2012	Shangzhou District	35.4735	21100	5414
2013	Shangzhou District	32.9402	23558	6204
2014	Shangzhou District	29.8535	26196	7066
2015	Shangzhou District	26.7335	24010	7614
2016	Shangzhou District	29.089	26016	8230
2017	Shangzhou District	28.758
2018	Shangzhou District	24.458
2019	Shangzhou District	27.287
2020	Shangzhou District
2021	Shangzhou District
2012	Luonan County	42.9202	20407	5592
2013	Luonan County	39.6602	22754	6414
2014	Luonan County	36.9335	25302	7301
2015	Luonan County	34.7802	23476	7705
2016	Luonan County	48.698	25421	8375
2017	Luonan County	48.047
2018	Luonan County	34.847
2019	Luonan County	34.708
2020	Luonan County
2021	Luonan County
2012	Shanyang County	32.7535	19750	5606
2013	Shanyang County	30.7402	21922	6474
2014	Shanyang County	28.8268	24443	7380
2015	Shanyang County	27.5668	23245	7850
2016	Shanyang County	36.738	25135	8501
2017	Shanyang County	35.962
2018	Shanyang County	27.461
2019	Shanyang County	27.837
2020	Shanyang County
2021	Shanyang County
2012	Danfeng County	21.1268	20527	5536
2013	Danfeng County	20.0201	22905	6333
2014	Danfeng County	19.0601	25447	7149
2015	Danfeng County	18.5801	23571	7701
2016	Danfeng County	21.396	25569	8340
2017	Danfeng County	21.074
2018	Danfeng County	19.095
2019	Danfeng County	18.348
2020	Danfeng County
2021	Danfeng County
2012	Shangnan County	12.6134	20058	5529
2013	Shangnan County	11.6667	22307	6400
2014	Shangnan County	10.9601	24783	7219
2015	Shangnan County	10.5601	23250	7739
2016	Shangnan County	20.346	25215	8420
2017	Shangnan County	20.716
2018	Shangnan County	10.342
2019	Shangnan County	10.864
2020	Shangnan County
2021	Shangnan County
2012	Zhen’an County	32.631	20201	5585
2013	Zhen’an County	32.391	22475	6394
2014	Zhen’an County	32.467	25037	7276
2015	Zhen’an County	33.692	23292	7750
2016	Zhen’an County	33.625	25289	8370
2017	Zhen’an County	34.148
2018	Zhen’an County	29.154
2019	Zhen’an County	28.055
2020	Zhen’an County
2021	Zhen’an County
2012	Zhashui County	12.4534	20128	5446
2013	Zhashui County	12.1801	22362	6306
2014	Zhashui County	12.0667	24822	7168
2015	Zhashui County	12.1001	23236	7622
2016	Zhashui County	13.135	25141	8277
2017	Zhashui County	13.033
2018	Zhashui County	14.085
2019	Zhashui County	12.49
2020	Zhashui County
2021	Zhashui County

## Sheet: Linear Interpolation Data
year	xian	id	X1	X2	X3	H1(Sown Area of Grain Crops)	H2	H3	H4（Sown Area of Grain Crops）	H2+H3	H3/（H2+H3）（农村居民人均可支配收入占比）	H3/（H2+H3）（农村居民人均可支配收入占比）	Average Temperature	Regional Economic Density	Total Grain Output
2012	Baqiao District	1	13.8067	28688	13278	13.8067	28688	13278	13.8067	41966	0.316399	0.316399	13	7190	61082
2013	Baqiao District	1	13.2134	31952	15203	13.2134	31952	15203	13.2134	47155	0.322405	0.322405	15	8291	56370
2014	Baqiao District	1	12.0734	35147	16982	12.0734	35147	16982	12.0734	52129	0.325769	0.325769	14	9039	52853
2015	Baqiao District	1	11.5801	34236	18891	11.5801	34236	18891	11.5801	53127	0.355582	0.355582	14	10240	54071
2016	Baqiao District	1	10.6867	36784	20431	10.6867	36784	20431	10.6867	57215	0.357092	0.357092	14	10163	52567
2017	Baqiao District	1	10.339			10.339	39332	21971	10.339	61303	0.3584	0.3584	14	13200	49645
2018	Baqiao District	1	5.42669			5.42669	41880	23511	5.42669	65391	0.359545	0.359545	14	14816	27673
2019	Baqiao District	1	4.71336			4.71336	44428	25051	4.71336	69479	0.360555	0.360555	14	15075	24684
2020	Baqiao District	1	4.52002			4.52002	46976	26591	4.52002	73567	0.361453	0.361453	13	16704	21695
2021	Baqiao District	1				4.32669	49524	28131	4.32669	77655	0.362256	0.362256	14	18701	18706
2012	Yanliang District	2	12.9601	31026	13403	12.9601	31026	13403	12.9601	44429	0.301672	0.301672	15	5786	81318
2013	Yanliang District	2	14.2467	34375	15212	14.2467	34375	15212	14.2467	49587	0.306774	0.306774	17	6909	85369
2014	Yanliang District	2	14.1667	37503	17007	14.1667	37503	17007	14.1667	54510	0.311998	0.311998	16	7962	81003
2015	Yanliang District	2	14.2734	34382	18850	14.2734	34382	18850	14.2734	53232	0.35411	0.35411	16	7845	88211
2016	Yanliang District	2	13.9667	36931	20262	13.9667	36931	20262	13.9667	57193	0.354274	0.354274	16	7930	86790
2017	Yanliang District	2	14.019			14.019	39480	21674	14.019	61154	0.354417	0.354417	16	9823	84826
2018	Yanliang District	2	18.5134			18.5134	42029	23086	18.5134	65115	0.354542	0.354542	16	10227	120276
2019	Yanliang District	2	17.9001			17.9001	44578	24498	17.9001	69076	0.354653	0.354653	16	10430	114974
2020	Yanliang District	2	18.0001			18.0001	47127	25910	18.0001	73037	0.354752	0.354752	15	10186	109672
2021	Yanliang District	2				18.1001	49676	27322	18.1001	76998	0.35484	0.35484	16	10830	104370
2012	Lintong District	3	74.8404	24568	10685	74.8404	24568	10685	74.8404	35253	0.303095	0.303095	14	2309	351676
2013	Lintong District	3	70.807	27318	12160	70.807	27318	12160	70.807	39478	0.30802	0.30802	16	2474	326809
2014	Lintong District	3	68.987	29804	13595	68.987	29804	13595	68.987	43399	0.313256	0.313256	15	2527	317870
2015	Lintong District	3	66.8337	28628	15164	66.8337	28628	15164	66.8337	43792	0.346273	0.346273	15	2100	328636
2016	Lintong District	3	65.467	30753	16389	65.467	30753	16389	65.467	47142	0.347652	0.347652	16	1999	316894
2017	Lintong District	3	63.695			63.695	32878	17614	63.695	50492	0.348847	0.348847	15	2413	304775
2018	Lintong District	3	66.867			66.867	35003	18839	66.867	53842	0.349894	0.349894	15	2593	329083
2019	Lintong District	3	66.7403			66.7403	37128	20064	66.7403	57192	0.350818	0.350818	15	2650	332607
2020	Lintong District	3	66.807			66.807	39253	21289	66.807	60542	0.35164	0.35164	14	2757	336131
2021	Lintong District	3				66.8737	41378	22514	66.8737	63892	0.352376	0.352376	15	2864	339655
2012	Chang’an District	4		26493	11107		26493	11107	77.5588	37600	0.295399	0.295399	11	2295	368814
2013	Chang’an District	4		29460	12695		29460	12695	73.7769	42155	0.301151	0.301151	13	2325	357700
2014	Chang’an District	4		32377	14206		32377	14206	69.995	46583	0.304961	0.304961	12	2649	338400
2015	Chang’an District	4		32204	15486		32204	15486	6.72336	47690	0.324722	0.324722	12	3229	345885
2016	Chang’an District	4		34627	16741		34627	16741	65.5461	51368	0.325903	0.325903	12	3829	332415
2017	Chang’an District	4					37050	17996	53.2133	55046	0.326927	0.326927	12	4981	265260
2018	Chang’an District	4					39473	19251	30.9421	58724	0.327822	0.327822	12	5725	156242
2019	Chang’an District	4					41896	20506	26.3732	62402	0.328611	0.328611	12	6305	157518
2020	Chang’an District	4					44319	21761	27.4649	66080	0.329313	0.329313	11	7155	158794
2021	Chang’an District	4					46742	23016	28.1541	69758	0.329941	0.329941	12	7989	160070
2012	Lantian County	5	65.707	19957	7824	65.707	19957	7824	65.707	27781	0.281631	0.281631	11	486	289759
2013	Lantian County	5	64.0937	21953	8833	64.0937	21953	8833	64.0937	30786	0.286916	0.286916	12	543	264600
2014	Lantian County	5	63.8337	23907	9911	63.8337	23907	9911	63.8337	33818	0.293069	0.293069	11	590	250600
2015	Lantian County	5	63.2403	24509	11084	63.2403	24509	11084	63.2403	35593	0.31141	0.31141	11	564	260422
2016	Lantian County	5	62.887	26321	12082	62.887	26321	12082	62.887	38403	0.314611	0.314611	12	610	255720
2017	Lantian County	5	62.208			62.208	28133	13080	62.208	41213	0.317376	0.317376	12	715	253850
2018	Lantian County	5	40.3002			40.3002	29945	14078	40.3002	44023	0.319787	0.319787	11	787	170353
2019	Lantian County	5	40.2135			40.2135	31757	15076	40.2135	46833	0.32191	0.32191	11	744	171041
2020	Lantian County	5				40.1269	33569	16074	40.1269	49643	0.323792	0.323792	11	713	171729
2021	Lantian County	5				40.0402	35381	17072	40.0402	52453	0.325472	0.325472	11	756	172417
2012	Zhouzhi County	6	52.0536	20025	7733	52.0536	20025	7733	52.0536	27758	0.278586	0.278586	10	265	243158
2013	Zhouzhi County	6	52.6803	22243	8870	52.6803	22243	8870	52.6803	31113	0.28509	0.28509	11	297	230700
2014	Zhouzhi County	6	51.3403	24445	9961	51.3403	24445	9961	51.3403	34406	0.289513	0.289513	10	327	224955
2015	Zhouzhi County	6	49.8469	25070	11148	49.8469	25070	11148	49.8469	36218	0.307803	0.307803	11	350	231714
2016	Zhouzhi County	6	48.6602	26899	12207	48.6602	26899	12207	48.6602	39106	0.312152	0.312152	11	387	222595
2017	Zhouzhi County	6	45.097			45.097	28728	13266	45.097	41994	0.315902	0.315902	11	452	206556
2018	Zhouzhi County	6	25.5468			25.5468	30557	14325	25.5468	44882	0.31917	0.31917	10	493	119095
2019	Zhouzhi County	6	25.5001			25.5001	32386	15384	25.5001	47770	0.322043	0.322043	11	466	120206
2020	Zhouzhi County	6	25.3268			25.3268	34215	16443	25.3268	50658	0.324588	0.324588	10	473	121317
2021	Zhouzhi County	6				25.1535	36044	17502	25.1535	53546	0.326859	0.326859	11	497	122428
2012	Gaoling District	7		23462	10673		23462	10673	31115.7	34135	0.31267	0.31267	15	7761	200246
2013	Gaoling District	7		26030	12167		26030	12167	29999	38197	0.318533	0.318533	17	9522	198200
2014	Gaoling District	7		28581	13615		28581	13615	28882.3	42196	0.322661	0.322661	16	10207	190374
2015	Gaoling District	7		27423	15191		27423	15191	27765.6	42614	0.356479	0.356479	16	9912	192757
2016	Gaoling District	7		29464	16431		29464	16431	26648.9	45895	0.358013	0.358013	17	10212	187779
2017	Gaoling District	7					31505	17671	25532.2	49176	0.359342	0.359342	16	12827	179220
2018	Gaoling District	7					33546	18911	24415.5	52457	0.360505	0.360505	16	12872	123558
2019	Gaoling District	7					35587	20151	23298.8	55738	0.361531	0.361531	16	12736	122926
2020	Gaoling District	7					37628	21391	22182.2	59019	0.362443	0.362443	15	12738	122294
2021	Gaoling District	7					39669	22631	21065.5	62300	0.363258	0.363258	15	13086	121662
2012	Huyi District	8		22520	9654	-20.9289	22520	9654	20.9289	32174	0.300056	0.300056	11	1109	313700
2013	Huyi District	8		24817	10899	-11.3607	24817	10899	11.3607	35716	0.305157	0.305157	13	1211	303400
2014	Huyi District	8		27026	12218	-1.79255	27026	12218	10.7925	39244	0.311334	0.311334	12	1263	296007
2015	Huyi District	8		26043	13616	7.77564	26043	13616	7.77564	39659	0.343327	0.343327	12	1179	304943
2016	Huyi District	8		27970	14638	17.3438	27970	14638	17.3438	42608	0.343551	0.343551	12	1273	297776
2017	Huyi District	8	26.912			26.912	29897	15660	26.912	45557	0.343745	0.343745	12	1382	269000
2018	Huyi District	8	36.4802			36.4802	31824	16682	36.4802	48506	0.343916	0.343916	12	1741	191315
2019	Huyi District	8	37.2069			37.2069	33751	17704	37.2069	51455	0.344068	0.344068	12	1444	195893
2020	Huyi District	8	31.3735			31.3735	35678	18726	31.3735	54404	0.344203	0.344203	12	1872	200471
2021	Huyi District	8				25.5401	37605	19748	25.5401	57353	0.344324	0.344324	12	2132	205049
2012	Chencang District	9	58.41	25971	8678	58.41	25971	8678	58.41	34649	0.250455	0.250455	10	613	240560
2013	Chencang District	9	58.895	28698	9850	58.895	28698	9850	58.895	38548	0.255526	0.255526	12	659	231078
2014	Chencang District	9	58.118	31797	11081	58.118	31797	11081	58.118	42878	0.258431	0.258431	11	702	224800
2015	Chencang District	9	58.102	28881	9823	58.102	28881	9823	58.102	38704	0.253798	0.253798	11	598	233370
2016	Chencang District	9	57.437	31105	10638	57.437	31105	10638	57.437	41743	0.254845	0.254845	12	667	226699
2017	Chencang District	9	57.425			57.425	33329	11453	57.425	44782	0.25575	0.25575	11	789	224139
2018	Chencang District	9	50.892			50.892	35553	12268	50.892	47821	0.25654	0.25654	11	877	197274
2019	Chencang District	9	50.799			50.799	37777	13083	50.799	50860	0.257236	0.257236	11	883	203032
2020	Chencang District	9				50.706	40001	13898	50.706	53899	0.257853	0.257853	11	909	208790
2021	Chencang District	9				50.613	42225	14713	50.613	56938	0.258404	0.258404	11	995	214548
2012	Mei County	10	24.89	26817	8313	24.89	26817	8313	24.89	35130	0.236635	0.236635	10	894	134187
2013	Mei County	10	23.401	29874	9527	23.401	29874	9527	23.401	39401	0.241796	0.241796	12	1057	126030
2014	Mei County	10	22.594	32981	10755	22.594	32981	10755	22.594	43736	0.245907	0.245907	11	1221	126173
2015	Mei County	10	22.308	30127	9590	22.308	30127	9590	22.308	39717	0.241458	0.241458	11	1246	123284
2016	Mei County	10	21.566	32417	10386	21.566	32417	10386	21.566	42803	0.242647	0.242647	12	1346	117587
2017	Mei County	10	21.28			21.28	34707	11182	21.28	45889	0.243675	0.243675	11	1503	116083
2018	Mei County	10	13.112			13.112	36997	11978	13.112	48975	0.244574	0.244574	11	1597	72501
2019	Mei County	10	13.087			13.087	39287	12774	13.087	52061	0.245366	0.245366	11	1879	73228
2020	Mei County	10				13.062	41577	13570	13.062	55147	0.24607	0.24607	11	2063	73955
2021	Mei County	10				13.037	43867	14366	13.037	58233	0.246699	0.246699	11	2329	74682
2012	Fufeng County	11	47.89	24205	7565	47.89	24205	7565	47.89	31770	0.238118	0.238118	12	1161	280526
2013	Fufeng County	11	48.471	26892	8647	48.471	26892	8647	48.471	35539	0.24331	0.24331	14	1349	273050
2014	Fufeng County	11	48.427	29608	9736	48.427	29608	9736	48.427	39344	0.247458	0.247458	13	1427	265514
2015	Fufeng County	11	48.484	27125	8646	48.484	27125	8646	48.484	35771	0.241704	0.241704	13	1388	280898
2016	Fufeng County	11	47.899	29186	9363	47.899	29186	9363	47.899	38549	0.242886	0.242886	14	1534	272954
2017	Fufeng County	11	47.916			47.916	31247	10080	47.916	41327	0.243908	0.243908	13	1768	269563
2018	Fufeng County	11	45.264			45.264	33308	10797	45.264	44105	0.244802	0.244802	13	1984	257351
2019	Fufeng County	11	45.184			45.184	35369	11514	45.184	46883	0.24559	0.24559	13	2087	256168
2020	Fufeng County	11				45.104	37430	12231	45.104	49661	0.24629	0.24629	13	2192	254985
2021	Fufeng County	11				45.024	39491	12948	45.024	52439	0.246915	0.246915	13	2462	253802
2012	Fengxiang District	12	55.873	26630	9159	55.873	26630	9159	55.873	35789	0.255917	0.255917	11	1213	270408
2013	Fengxiang District	12	56.132	29426	10423	56.132	29426	10423	56.132	39849	0.261562	0.261562	13	1374	260048
2014	Fengxiang District	12	55.271	32428	11716	55.271	32428	11716	55.271	44144	0.265404	0.265404	12	1542	256353
2015	Fengxiang District	12	55.007	29426	10375	55.007	29426	10375	55.007	39801	0.260672	0.260672	12	1593	264037
2016	Fengxiang District	12	54.341	31662	11225	54.341	31662	11225	54.341	42887	0.261734	0.261734	13	1714	256439
2017	Fengxiang District	12	54.301			54.301	33898	12075	54.301	45973	0.262654	0.262654	12	1771	253150
2018	Fengxiang District	12	55.357			55.357	36134	12925	55.357	49059	0.263458	0.263458	12	1839	256816
2019	Fengxiang District	12	55.266			55.266	38370	13775	55.266	52145	0.264167	0.264167	12	1897	255007
2020	Fengxiang District	12				55.175	40606	14625	55.175	55231	0.264797	0.264797	12	2034	253198
2021	Fengxiang District	12				55.084	42842	15475	55.084	58317	0.26536	0.26536	12	2242	251389
2012	Qishan County	13	47.793	26242	9153	47.793	26242	9153	47.793	35395	0.258596	0.258596	11	1566	275099
2013	Qishan County	13	48.626	29050	10435	48.626	29050	10435	48.626	39485	0.264278	0.264278	13	1683	265060
2014	Qishan County	13	48.292	32100	11791	48.292	32100	11791	48.292	43891	0.268643	0.268643	12	1742	265783
2015	Qishan County	13	48.201	29212	10483	48.201	29212	10483	48.201	39695	0.264089	0.264089	12	1680	270048
2016	Qishan County	13	47.593	31461	11343	47.593	31461	11343	47.593	42804	0.264999	0.264999	13	1824	262308
2017	Qishan County	13	47.526			47.526	33710	12203	47.526	45913	0.265785	0.265785	12	2204	258649
2018	Qishan County	13	40.684			40.684	35959	13063	40.684	49022	0.266472	0.266472	12	2256	226246
2019	Qishan County	13	40.612			40.612	38208	13923	40.612	52131	0.267077	0.267077	12	2095	223824
2020	Qishan County	13				40.54	40457	14783	40.54	55240	0.267614	0.267614	12	1975	221402
2021	Qishan County	13				40.468	42706	15643	40.468	58349	0.268094	0.268094	12	2041	218980
2012	Long County	14	33.622	20630	6740	33.622	20630	6740	33.622	27370	0.246255	0.246255	9	190	110803
2013	Long County	14	33.922	23002	7644	33.922	23002	7644	33.922	30646	0.249429	0.249429	11	219	101012
2014	Long County	14	32.679	25464	8568	32.679	25464	8568	32.679	34032	0.251763	0.251763	10	251	100101
2015	Long County	14	32.73	24179	7581	32.73	24179	7581	32.73	31760	0.238696	0.238696	10	263	105230
2016	Long County	14	32.269	26089	8226	32.269	26089	8226	32.269	34315	0.23972	0.23972	11	297	103314
2017	Long County	14	31.944			31.944	27999	8871	31.944	36870	0.240602	0.240602	10	373	100000
2018	Long County	14				32.3315	29909	9516	32.3315	39425	0.24137	0.24137	10	428	103672
2019	Long County	14	32.719			32.719	31819	10161	32.719	41980	0.242044	0.242044	10	402	104296
2020	Long County	14				33.1065	33729	10806	33.1065	44535	0.242641	0.242641	10	433	104920
2021	Long County	14				33.494	35639	11451	33.494	47090	0.243173	0.243173	10	478	105544
2012	Qianyang County	15	19.845	22525	7007	19.845	22525	7007	19.845	29532	0.237268	0.237268	11	260	61280
2013	Qianyang County	15	19.506	25070	7938	19.506	25070	7938	19.506	33008	0.240487	0.240487	12	311	55053
2014	Qianyang County	15	19.004	27703	8955	19.004	27703	8955	19.004	36658	0.244285	0.244285	12	352	56297
2015	Qianyang County	15	18.559	26341	7915	18.559	26341	7915	18.559	34256	0.231054	0.231054	12	412	58908
2016	Qianyang County	15	18.238	28369	8572	18.238	28369	8572	18.238	36941	0.232046	0.232046	12	488	56707
2017	Qianyang County	15	17.867			17.867	30397	9229	17.867	39626	0.232903	0.232903	12	545	55023
2018	Qianyang County	15	18.271			18.271	32425	9886	18.271	42311	0.233651	0.233651	12	599	57455
2019	Qianyang County	15	17.536			17.536	34453	10543	17.536	44996	0.23431	0.23431	12	679	57179
2020	Qianyang County	15				16.801	36481	11200	16.801	47681	0.234894	0.234894	11	740	56903
2021	Qianyang County	15				16.066	38509	11857	16.066	50366	0.235417	0.235417	12	823	56627
2012	Weibin District	16	7.825	26465	10208	7.825	26465	10208	7.825	36673	0.278352	0.278352	9	7008	26527
2013	Weibin District	16	7.638	29323	11596	7.638	29323	11596	7.638	40919	0.283389	0.283389	11	7354	22000
2014	Weibin District	16	7.385	32519	13069	7.385	32519	13069	7.385	45588	0.286676	0.286676	10	7671	20000
2015	Weibin District	16	6.704	31598	11587	6.704	31598	11587	6.704	43185	0.268311	0.268311	10	8089	19896
2016	Weibin District	16	5.509	34031	12514	5.509	34031	12514	5.509	46545	0.268858	0.268858	11	8614	15866
2017	Weibin District	16	4.768			4.768	36464	13441	4.768	49905	0.269332	0.269332	10	9142	13512
2018	Weibin District	16	3.924			3.924	38897	14368	3.924	53265	0.269746	0.269746	10	9403	11788
2019	Weibin District	16	3.553			3.553	41330	15295	3.553	56625	0.27011	0.27011	10	8970	10127
2020	Weibin District	16				3.182	43763	16222	3.182	59985	0.270434	0.270434	10	9215	8466
2021	Weibin District	16				2.811	46196	17149	2.811	63345	0.270724	0.270724	10	9460	6805
2012	Jintai District	17	11.96	25473	9290	11.96	25473	9290	11.96	34763	0.267238	0.267238	12	7807	36787
2013	Jintai District	17	11.795	28224	10581	11.795	28224	10581	11.795	38805	0.272671	0.272671	14	8923	34114
2014	Jintai District	17	11.684	31329	11883	11.684	31329	11883	11.684	43212	0.274993	0.274993	13	9561	33019
2015	Jintai District	17	11.566	30485	10523	11.566	30485	10523	11.566	41008	0.256608	0.256608	13	9846	36866
2016	Jintai District	17	11.415	32832	11365	11.415	32832	11365	11.415	44197	0.257144	0.257144	14	10955	35591
2017	Jintai District	17	11.206			11.206	35179	12207	11.206	47386	0.257608	0.257608	13	11580	35000
2018	Jintai District	17	11.353			11.353	37526	13049	11.353	50575	0.258013	0.258013	13	11995	38269
2019	Jintai District	17	11.041			11.041	39873	13891	11.041	53764	0.25837	0.25837	13	11811	35696
2020	Jintai District	17				10.729	42220	14733	10.729	56953	0.258687	0.258687	13	11733	33123
2021	Jintai District	17				10.417	44567	15575	10.417	60142	0.25897	0.25897	13	11655	30550
2012	Jingyang County	18	51.746	26513	8379	51.746	26513	8379	51.746	34892	0.240141	0.240141	14	1490	257271
2013	Jingyang County	18	51.531	29270	9561	51.531	29270	9561	51.531	38831	0.246221	0.246221	16	1705	242444
2014	Jingyang County	18	50.815	32431	10794	50.815	32431	10794	50.815	43225	0.249717	0.249717	15	1920	239839
2015	Jingyang County	18	50.469	29458	10106	50.469	29458	10106	50.469	39564	0.255434	0.255434	15	2023	247212
2016	Jingyang County	18	50.1	31730	10940	50.1	31730	10940	50.1	42670	0.256386	0.256386	16	2261	240797
2017	Jingyang County	18	34.416			34.416	34002	11774	34.416	45776	0.257209	0.257209	15	1333	163222
2018	Jingyang County	18	33.443			33.443	36274	12608	33.443	48882	0.257927	0.257927	15	1323	161015
2019	Jingyang County	18	33.384			33.384	38546	13442	33.384	51988	0.25856	0.25856	15	1329	161058
2020	Jingyang County	18	33.4202			33.4202	40818	14276	33.4202	55094	0.259121	0.259121	15	1419	161101
2021	Jingyang County	18				33.4565	43090	15110	33.4565	58200	0.259622	0.259622	15	2049	161144
2012	Sanyuan County	19	42.11	26619	8383	42.11	26619	8383	42.11	35002	0.239501	0.239501	14	2088	206504
2013	Sanyuan County	19	42.064	29387	9607	42.064	29387	9607	42.064	38994	0.246371	0.246371	16	2440	200001
2014	Sanyuan County	19	40.834	32561	10846	40.834	32561	10846	40.834	43407	0.249868	0.249868	15	2775	195125
2015	Sanyuan County	19	40.508	29570	10135	40.508	29570	10135	40.508	39705	0.255258	0.255258	15	3079	201111
2016	Sanyuan County	19	40.192	31851	10961	40.192	31851	10961	40.192	42812	0.256026	0.256026	16	3354	196010
2017	Sanyuan County	19	39.816			39.816	34132	11787	39.816	45919	0.256691	0.256691	15	4092	194981
2018	Sanyuan County	19	38.007			38.007	36413	12613	38.007	49026	0.257272	0.257272	15	4155	188916
2019	Sanyuan County	19	37.938			37.938	38694	13439	37.938	52133	0.257783	0.257783	15	3732	188519
2020	Sanyuan County	19				37.869	40975	14265	37.869	55240	0.258237	0.258237	15	3601	188122
2021	Sanyuan County	19				37.8	43256	15091	37.8	58347	0.258642	0.258642	15	4092	187725
2012	Liquan County	20	27.37	25048	8381	27.37	25048	8381	27.37	33429	0.25071	0.25071	13	1074	128485
2013	Liquan County	20	27.41	27628	9571	27.41	27628	9571	27.41	37199	0.257292	0.257292	15	1263	123113
2014	Liquan County	20	26.865	30584	10796	26.865	30584	10796	26.865	41380	0.260899	0.260899	14	1433	120041
2015	Liquan County	20	26.613	27755	10089	26.613	27755	10089	26.613	37844	0.266594	0.266594	14	1500	125138
2016	Liquan County	20	26.336	29818	10922	26.336	29818	10922	26.336	40740	0.26809	0.26809	15	1622	121414
2017	Liquan County	20	26.036			26.036	31881	11755	26.036	43636	0.269388	0.269388	14	1721	120158
2018	Liquan County	20	25.51			25.51	33944	12588	25.51	46532	0.270524	0.270524	14	1586	115859
2019	Liquan County	20	25.333			25.333	36007	13421	25.333	49428	0.271526	0.271526	14	1517	112282
2020	Liquan County	20				25.156	38070	14254	25.156	52324	0.272418	0.272418	14	1543	108705
2021	Liquan County	20				24.979	40133	15087	24.979	55220	0.273216	0.273216	14	1701	105128
2012	Qindu District	21	14.178	28798	9355	14.178	28798	9355	14.178	38153	0.245197	0.245197	14	25644	70388
2013	Qindu District	21	13.549	32081	10787	13.549	32081	10787	13.549	42868	0.251633	0.251633	15	29160	62770
2014	Qindu District	21	13.101	35738	12211	13.101	35738	12211	13.101	47949	0.254666	0.254666	14	33023	58922
2015	Qindu District	21	12.895	32498	11398	12.895	32498	11398	12.895	43896	0.259659	0.259659	14	36250	60011
2016	Qindu District	21	12.07	34983	12321	12.07	34983	12321	12.07	47304	0.260464	0.260464	15	40373	56118
2017	Qindu District	21	6.365			6.365	37468	13244	6.365	50712	0.261161	0.261161	15	31158	30056
2018	Qindu District	21	4.981			4.981	39953	14167	4.981	54120	0.26177	0.26177	14	29745	24834
2019	Qindu District	21	4.328			4.328	42438	15090	4.328	57528	0.262307	0.262307	14	26717	24752
2020	Qindu District	21				3.675	44923	16013	3.675	60936	0.262784	0.262784	14	28123	24670
2021	Qindu District	21				3.022	47408	16936	3.022	64344	0.26321	0.26321	14	29528	24588
2012	Weicheng District	22	21.886	28694	9218	21.886	28694	9218	21.886	37912	0.243142	0.243142	14	9796	107594
2013	Weicheng District	22	21.279	31936	10582	21.279	31936	10582	21.279	42518	0.248883	0.248883	16	11221	97237
2014	Weicheng District	22	20.663	35545	11979	20.663	35545	11979	20.663	47524	0.252062	0.252062	15	11633	92962
2015	Weicheng District	22	20.309	32316	11183	20.309	32316	11183	20.309	43499	0.257086	0.257086	15	11511	94916
2016	Weicheng District	22	19.123	34621	12053	19.123	34621	12053	19.123	46674	0.258238	0.258238	16	12680	88941
2017	Weicheng District	22				17.937	36926	12923	17.937	49849	0.259243	0.259243	15	11174	82966
2018	Weicheng District	22				16.751	39231	13793	16.751	53024	0.260127	0.260127	15	13924	76991
2019	Weicheng District	22				15.565	41536	14663	15.565	56199	0.260912	0.260912	15	9433	71016
2020	Weicheng District	22				14.379	43841	15533	14.379	59374	0.261613	0.261613	14	10094	65041
2021	Weicheng District	22				13.193	46146	16403	13.193	62549	0.262242	0.262242	15	10756	59066
2012	Qian County	23	55.967	24915	8314	55.967	24915	8314	55.967	33229	0.250203	0.250203	13	1078	268199
2013	Qian County	23	55.853	27481	9495	55.853	27481	9495	55.853	36976	0.256788	0.256788	14	1268	253101
2014	Qian County	23	54.853	30421	10700	54.853	30421	10700	54.853	41121	0.260208	0.260208	14	1446	267077
2015	Qian County	23	54.519	27620	10007	54.519	27620	10007	54.519	37627	0.265953	0.265953	14	1503	262897
2016	Qian County	23	54.181	29673	10773	54.181	29673	10773	54.181	40446	0.266355	0.266355	14	1619	255915
2017	Qian County	23	53.82			53.82	31726	11539	53.82	43265	0.266705	0.266705	14	1784	251617
2018	Qian County	23	54.404			54.404	33779	12305	54.404	46084	0.267012	0.267012	13	1731	254480
2019	Qian County	23	54.264			54.264	35832	13071	54.264	48903	0.267284	0.267284	13	1711	249713
2020	Qian County	23				54.124	37885	13837	54.124	51722	0.267526	0.267526	13	1552	244946
2021	Qian County	23				53.984	39938	14603	53.984	54541	0.267744	0.267744	14	1753	240179
2012	Wugong County	24	41.065	24142	8167	41.065	24142	8167	41.065	32309	0.252778	0.252778	13	1863	210562
2013	Wugong County	24	40.494	26677	9335	40.494	26677	9335	40.494	36012	0.259219	0.259219	14	2411	200000
2014	Wugong County	24	39.655	29585	10521	39.655	29585	10521	39.655	40106	0.26233	0.26233	13	2765	197222
2015	Wugong County	24	39.43	26865	9857	39.43	26865	9857	39.43	36722	0.268422	0.268422	13	2825	203144
2016	Wugong County	24	39.138	28808	10660	39.138	28808	10660	39.138	39468	0.270092	0.270092	14	3097	198003
2017	Wugong County	24	38.87			38.87	30751	11463	38.87	42214	0.271545	0.271545	14	3540	194191
2018	Wugong County	24	38.482			38.482	32694	12266	38.482	44960	0.27282	0.27282	13	3549	194795
2019	Wugong County	24	38.409			38.409	34637	13069	38.409	47706	0.273949	0.273949	13	3848	197849
2020	Wugong County	24				38.336	36580	13872	38.336	50452	0.274954	0.274954	13	3884	200903
2021	Wugong County	24				38.263	38523	14675	38.263	53198	0.275856	0.275856	13	4305	203957
2012	Xingping City	25	43.576	27246	8437	43.576	27246	8437	43.576	35683	0.236443	0.236443	13	2858	222957
2013	Xingping City	25	44.26	30216	9677	44.26	30216	9677	44.26	39893	0.242574	0.242574	15	3449	222003
2014	Xingping City	25	43.151	33600	10936	43.151	33600	10936	43.151	44536	0.245554	0.245554	14	3598	216995
2015	Xingping City	25	42.946	30542	10232	42.946	30542	10232	42.946	40774	0.250944	0.250944	14	3774	224011
2016	Xingping City	25	42.647	32782	11067	42.647	32782	11067	42.647	43849	0.252389	0.252389	15	4285	218147
2017	Xingping City	25	38.655			38.655	35022	11902	38.655	46924	0.253644	0.253644	14	5323	194671
2018	Xingping City	25	36.448			36.448	37262	12737	36.448	49999	0.254745	0.254745	14	5482	186668
2019	Xingping City	25	36.386			36.386	39502	13572	36.386	53074	0.255718	0.255718	14	5334	189432
2020	Xingping City	25	36.3828			36.3828	41742	14407	36.3828	56149	0.256585	0.256585	14	5345	192196
2021	Xingping City	25				36.3797	43982	15242	36.3797	59224	0.257362	0.257362	14	6202	194960
2012	Tongguan County	26	13.311	21089	6388	13.311	21089	6388	13.311	27477	0.232485	0.232485	13	624	46481
2013	Tongguan County	26	13.294	23346	7391	13.294	23346	7391	13.294	30737	0.240459	0.240459	15	737	43100
2014	Tongguan County	26	13.18	26101	8381	13.18	26101	8381	13.18	34482	0.243054	0.243054	14	781	41009
2015	Tongguan County	26	13.361	23911	8368	13.361	23911	8368	13.361	32279	0.25924	0.25924	14	695	45339
2016	Tongguan County	26	13.421	25693	9063	13.421	25693	9063	13.421	34756	0.260761	0.260761	14	702	44039
2017	Tongguan County	26	13.456			13.456	27475	9758	13.456	37233	0.262079	0.262079	14	870	44056
2018	Tongguan County	26	13.174			13.174	29257	10453	13.174	39710	0.263233	0.263233	14	767	44324
2019	Tongguan County	26	13.09			13.09	31039	11148	13.09	42187	0.264252	0.264252	14	840	42363
2020	Tongguan County	26	13.2397			13.2397	32821	11843	13.2397	44664	0.265158	0.265158	14	838	40402
2021	Tongguan County	26				13.3895	34603	12538	13.3895	47141	0.265968	0.265968	14	901	38441
2012	Huazhou District	27		22438	6505	27.355	22438	6505	27.355	28943	0.224752	0.224752	11	972	119562
2013	Huazhou District	27		24749	7487	27.469	24749	7487	27.469	32236	0.232256	0.232256	12	1005	112300
2014	Huazhou District	27		27348	8438	27.583	27348	8438	27.583	35786	0.235791	0.235791	12	1016	110102
2015	Huazhou District	27		25140	8430	27.697	25140	8430	27.697	33570	0.251117	0.251117	12	948	117639
2016	Huazhou District	27	27.811	26963	9088	27.811	26963	9088	27.811	36051	0.252087	0.252087	12	775	114575
2017	Huazhou District	27	27.925			27.925	28786	9746	27.925	38532	0.252933	0.252933	12	834	114008
2018	Huazhou District	27				29.9955	30609	10404	29.9955	41013	0.253676	0.253676	12	664	136700
2019	Huazhou District	27	32.066			32.066	32432	11062	32.066	43494	0.254334	0.254334	12	872	139736
2020	Huazhou District	27	31.8507			31.8507	34255	11720	31.8507	45975	0.254921	0.254921	11	848	142772
2021	Huazhou District	27				31.6354	36078	12378	31.6354	48456	0.255448	0.255448	12	983	145808
2012	Huayin City	28		21668	6402		21668	6402		28070	0.228073	0.228073	12	828	80480
2013	Huayin City	28		24246	7325		24246	7325		31571	0.232017	0.232017	14	906	78100
2014	Huayin City	28		26719	8241		26719	8241		34960	0.235727	0.235727	13	959	75000
2015	Huayin City	28		24611	8236		24611	8236		32847	0.250738	0.250738	13	984	82176
2016	Huayin City	28		26567	8862		26567	8862		35429	0.250134	0.250134	13	857	78519
2017	Huayin City	28					28523	9488		38011	0.249612	0.249612	13	1040	80004
2018	Huayin City	28					30479	10114		40593	0.249156	0.249156	13	1116	109863
2019	Huayin City	28					32435	10740		43175	0.248755	0.248755	13	866	108339
2020	Huayin City	28	24.9867			24.9867	34391	11366	24.9867	45757	0.248399	0.248399	13	887	106815
2021	Huayin City	28					36347	11992		48339	0.248081	0.248081	13	950	105291
2012	Linwei District	29	88.187	23280	6887	88.187	23280	6887	88.187	30167	0.228296	0.228296	14	2077	367542
2013	Linwei District	29	85.894	26143	7870	85.894	26143	7870	85.894	34013	0.231382	0.231382	15	2166	337679
2014	Linwei District	29	83.581	29149	8940	83.581	29149	8940	83.581	38089	0.234713	0.234713	15	2404	333084
2015	Linwei District	29	82.967	26897	9045	82.967	26897	9045	82.967	35942	0.251655	0.251655	15	2428	349473
2016	Linwei District	29	81.819	29092	9805	81.819	29092	9805	81.819	38897	0.252076	0.252076	15	2632	342034
2017	Linwei District	29	81.452			81.452	31287	10565	81.452	41852	0.252437	0.252437	15	2932	342311
2018	Linwei District	29	83.892			83.892	33482	11325	83.892	44807	0.252751	0.252751	15	3321	363987
2019	Linwei District	29	68.223			68.223	35677	12085	68.223	47762	0.253025	0.253025	15	3384	297441
2020	Linwei District	29	83.764			83.764	37872	12845	83.764	50717	0.253268	0.253268	14	3497	230895
2021	Linwei District	29				99.305	40067	13605	99.305	53672	0.253484	0.253484	15	3610	164349
2012	Dali County	30	63.396	21200	7051	63.396	21200	7051	63.396	28251	0.249584	0.249584	14	566	290151
2013	Dali County	30	63.373	23596	8070	63.373	23596	8070	63.373	31666	0.254847	0.254847	16	618	278100
2014	Dali County	30	62.274	26168	9184	62.274	26168	9184	62.274	35352	0.259787	0.259787	15	633	270535
2015	Dali County	30	62.212	24264	9306	62.212	24264	9306	62.212	33570	0.277212	0.277212	15	590	283119
2016	Dali County	30	61.316	26193	10106	61.316	26193	10106	61.316	36299	0.27841	0.27841	16	653	275547
2017	Dali County	30	61.545			61.545	28122	10906	61.545	39028	0.27944	0.27944	16	912	278689
2018	Dali County	30	63.52			63.52	30051	11706	63.52	41757	0.280336	0.280336	16	848	296788
2019	Dali County	30	63.413			63.413	31980	12506	63.413	44486	0.281122	0.281122	16	949	306810
2020	Dali County	30	63.5037			63.5037	33909	13306	63.5037	47215	0.281817	0.281817	15	988	316832
2021	Dali County	30				63.5944	35838	14106	63.5944	49944	0.282436	0.282436	15	1084	326854
2012	Pucheng County	31	85.172	22342	6603	85.172	22342	6603	85.172	28945	0.228122	0.228122	14	821	360256
2013	Pucheng County	31	84.684	24800	7615	84.684	24800	7615	84.684	32415	0.234922	0.234922	16	896	330097
2014	Pucheng County	31	83.783	27677	8590	83.783	27677	8590	83.783	36267	0.236854	0.236854	15	957	325337
2015	Pucheng County	31	83.641	25476	8557	83.641	25476	8557	83.641	34033	0.251432	0.251432	15	980	352164
2016	Pucheng County	31	82.76	27476	9250	82.76	27476	9250	82.76	36726	0.251865	0.251865	15	1030	342191
2017	Pucheng County	31	82.154			82.154	29476	9943	82.154	39419	0.252239	0.252239	15	1146	345384
2018	Pucheng County	31	87.944			87.944	31476	10636	87.944	42112	0.252565	0.252565	15	1203	377849
2019	Pucheng County	31	87.79			87.79	33476	11329	87.79	44805	0.252851	0.252851	15	1226	375765
2020	Pucheng County	31	87.8648			87.8648	35476	12022	87.8648	47498	0.253105	0.253105	14	1285	373681
2021	Pucheng County	31				87.9397	37476	12715	87.9397	50191	0.253332	0.253332	15	1427	371597
2012	Fuping County	32	81.826	22015	6551	81.826	22015	6551	81.826	28566	0.229329	0.229329	13	806	380052
2013	Fuping County	32	81.366	24591	7514	81.366	24591	7514	81.366	32105	0.234045	0.234045	15	967	360006
2014	Fuping County	32	80.181	27321	8476	80.181	27321	8476	80.181	35797	0.23678	0.23678	14	1090	355004
2015	Fuping County	32	80.557	25417	8515	80.557	25417	8515	80.557	33932	0.250943	0.250943	14	1049	370656
2016	Fuping County	32	79.968	27468	9171	79.968	27468	9171	79.968	36639	0.250307	0.250307	15	1105	360202
2017	Fuping County	32	79.535			79.535	29519	9827	79.535	39346	0.249759	0.249759	14	1163	360364
2018	Fuping County	32	82.48			82.48	31570	10483	82.48	42053	0.249281	0.249281	14	1337	377887
2019	Fuping County	32	82.331			82.331	33621	11139	82.331	44760	0.248861	0.248861	14	1481	380305
2020	Fuping County	32	82.3627			82.3627	35672	11795	82.3627	47467	0.248488	0.248488	14	1555	382723
2021	Fuping County	32				82.3944	37723	12451	82.3944	50174	0.248156	0.248156	14	1728	385141
2012	Shenmu City	33		29316	12537	-127.589	29316	12537	127.589	41853	0.299548	0.299548	8	1315	121133
2013	Shenmu City	33		30100	13225	-95.596	30100	13225	95.596	43325	0.305251	0.305251	9	1212	123983
2014	Shenmu City	33		32610	13622	-63.603	32610	13622	63.603	46232	0.294644	0.294644	10	1268	124121
2015	Shenmu City	33		28450	12046	-31.61	28450	12046	31.61	40496	0.297461	0.297461	10	1071	122762
2016	Shenmu City	33		30384	12875	0.382996	30384	12875	38.2996	43259	0.297626	0.297626	9	1185	125266
2017	Shenmu City	33	32.376			32.376	32318	13704	32.376	46022	0.297771	0.297771	10	1454	129924
2018	Shenmu City	33	64.369			64.369	34252	14533	64.369	48785	0.297899	0.297899	9	1700	248901
2019	Shenmu City	33	67.644			67.644	36186	15362	67.644	51548	0.298014	0.298014	10	1785	253621
2020	Shenmu City	33	67.061			67.061	38120	16191	67.061	54311	0.298116	0.298116	9	1695	258341
2021	Shenmu City	33				66.478	40054	17020	66.478	57074	0.298209	0.298209	10	2421	263061
2012	Yuyang District	34	43.945	26071	10001	43.945	26071	10001	43.945	36072	0.277251	0.277251	8	569	243070
2013	Yuyang District	34	44.21	29069	11331	44.21	29069	11331	44.21	40400	0.28047	0.28047	10	654	237364
2014	Yuyang District	34	44.691	32217	12656	44.691	32217	12656	44.691	44873	0.28204	0.28204	10	721	239639
2015	Yuyang District	34	44.696	29110	11015	44.696	29110	11015	44.696	40125	0.274517	0.274517	10	770	218894
2016	Yuyang District	34	44.773	31206	11929	44.773	31206	11929	44.773	43135	0.27655	0.27655	9	789	239738
2017	Yuyang District	34	45.711			45.711	33302	12843	45.711	46145	0.278318	0.278318	10	990	242138
2018	Yuyang District	34	78.22			78.22	35398	13757	78.22	49155	0.27987	0.27987	9	1102	449443
2019	Yuyang District	34	78.118			78.118	37494	14671	78.118	52165	0.281242	0.281242	10	1329	451707
2020	Yuyang District	34	76.993			76.993	39590	15585	76.993	55175	0.282465	0.282465	9	1419	453971
2021	Yuyang District	34				75.868	41686	16499	75.868	58185	0.283561	0.283561	10	1510	456235
2012	Hengshan District	35		23920	7860		23920	7860	22.156	31780	0.247325	0.247325	9	243	152742
2013	Hengshan District	35		26527	8725		26527	8725	30.41	35252	0.247504	0.247504	10	285	156732
2014	Hengshan District	35		29021	9364		29021	9364	38.664	38385	0.243949	0.243949	10	318	158008
2015	Hengshan District	35		25905	9760		25905	9760	46.918	35665	0.273658	0.273658	10	272	156000
2016	Hengshan District	35		27951	10522		27951	10522	55.172	38473	0.27349	0.27349	10	280	167004
2017	Hengshan District	35					29997	11284	63.426	41281	0.273346	0.273346	10	356	176943
2018	Hengshan District	35					32043	12046	71.68	44089	0.27322	0.27322	10	437	266817
2019	Hengshan District	35					34089	12808	72.3935	46897	0.273109	0.273109	10	465	267297
2020	Hengshan District	35					36135	13570	73.107	49705	0.273011	0.273011	10	460	267777
2021	Hengshan District	35					38181	14332	71.906	52513	0.272923	0.272923	11	631	268257
2012	Jingbian County	36	51.363	28652	11413	51.363	28652	11413	51.363	40065	0.284862	0.284862	8	623	229713
2013	Jingbian County	36	51.675	30085	12680	51.675	30085	12680	51.675	42765	0.296504	0.296504	9	692	231758
2014	Jingbian County	36	51.863	33205	13086	51.863	33205	13086	51.863	46291	0.28269	0.28269	9	718	237461
2015	Jingbian County	36	49.713	29577	11058	49.713	29577	11058	49.713	40635	0.27213	0.27213	9	524	215168
2016	Jingbian County	36	49.44	31558	11910	49.44	31558	11910	49.44	43468	0.273995	0.273995	9	481	235810
2017	Jingbian County	36	53.448			53.448	33539	12762	53.448	46301	0.275631	0.275631	9	597	255321
2018	Jingbian County	36	69.374			69.374	35520	13614	69.374	49134	0.277079	0.277079	9	582	328656
2019	Jingbian County	36	69.343			69.343	37501	14466	69.343	51967	0.278369	0.278369	9	766	319516
2020	Jingbian County	36	68.363			68.363	39482	15318	68.363	54800	0.279526	0.279526	9	714	310376
2021	Jingbian County	36				67.383	41463	16170	67.383	57633	0.280568	0.280568	10	884	301236
2012	Dingbian County	37	110.226	25271	9492	110.226	25271	9492	110.226	34763	0.273049	0.273049	8	421	282210
2013	Dingbian County	37	110.899	28152	10744	110.899	28152	10744	110.899	38896	0.276224	0.276224	9	448	293789
2014	Dingbian County	37	111.142	30911	11829	111.142	30911	11829	111.142	42740	0.276766	0.276766	8	489	298472
2015	Dingbian County	37	110.857	28895	10926	110.857	28895	10926	110.857	39821	0.274378	0.274378	9	372	270551
2016	Dingbian County	37	110.652	30885	11789	110.652	30885	11789	110.652	42674	0.276257	0.276257	9	332	298428
2017	Dingbian County	37	110.842			110.842	32875	12652	110.842	45527	0.277901	0.277901	9	369	292126
2018	Dingbian County	37	165.68			165.68	34865	13515	165.68	48380	0.279351	0.279351	9	459	375044
2019	Dingbian County	37	165.427			165.427	36855	14378	165.427	51233	0.280639	0.280639	9	459	374273
2020	Dingbian County	37	163.196			163.196	38845	15241	163.196	54086	0.281792	0.281792	8	380	373502
2021	Dingbian County	37				160.965	40835	16104	160.965	56939	0.282829	0.282829	9	494	372731
2012	Fugu County	38	30.667	29083	11783	30.667	29083	11783	30.667	40866	0.288333	0.288333	8	1395	68411
2013	Fugu County	38	30.762	30392	13001	30.762	30392	13001	30.762	43393	0.299611	0.299611	9	1348	65176
2014	Fugu County	38	30.716	32732	13409	30.716	32732	13409	30.716	46141	0.290609	0.290609	9	1352	67214
2015	Fugu County	38	30.321	28417	10871	30.321	28417	10871	30.321	39288	0.2767	0.2767	10	1188	32388
2016	Fugu County	38	29.961	30321	11610	29.961	30321	11610	29.961	41931	0.276883	0.276883	9	1216	58391
2017	Fugu County	38	28.941			28.941	32225	12349	28.941	44574	0.277045	0.277045	10	1517	60521
2018	Fugu County	38	30.194			30.194	34129	13088	30.194	47217	0.277188	0.277188	9	1543	69446
2019	Fugu County	38	29.206			29.206	36033	13827	29.206	49860	0.277316	0.277316	10	1929	69453
2020	Fugu County	38	28.989			28.989	37937	14566	28.989	52503	0.277432	0.277432	9	1821	69460
2021	Fugu County	38				28.772	39841	15305	28.772	55146	0.277536	0.277536	10	2299	69467
2012	Jia County	39	24.562	21412	6408	24.562	21412	6408	24.562	27820	0.230338	0.230338	9	157	70730
2013	Jia County	39	24.734	23810	7254	24.734	23810	7254	24.734	31064	0.233518	0.233518	11	180	72629
2014	Jia County	39	24.908	26405	8162	24.908	26405	8162	24.908	34567	0.236121	0.236121	11	204	76731
2015	Jia County	39	24.265	23484	8174	24.265	23484	8174	24.265	31658	0.258197	0.258197	11	170	75530
2016	Jia County	39	25.685	25668	8893	25.685	25668	8893	25.685	34561	0.257313	0.257313	10	196	76662
2017	Jia County	39	25.277			25.277	27852	9612	25.277	37464	0.256566	0.256566	11	249	87436
2018	Jia County	39	57.266			57.266	30036	10331	57.266	40367	0.255927	0.255927	11	271	197980
2019	Jia County	39	57.426			57.426	32220	11050	57.426	43270	0.255373	0.255373	11	284	198396
2020	Jia County	39	56.963			56.963	34404	11769	56.963	46173	0.254889	0.254889	10	312	198812
2021	Jia County	39				56.5	36588	12488	56.5	49076	0.254462	0.254462	11	354	199228
2012	Wubu County	40	5.497	21992	6558	5.497	21992	6558	5.497	28550	0.229702	0.229702	10	329	17754
2013	Wubu County	40	5.537	24367	7352	5.537	24367	7352	5.537	31719	0.231785	0.231785	12	383	18227
2014	Wubu County	40	5.576	26904	8242	5.576	26904	8242	5.576	35146	0.234507	0.234507	11	426	18816
2015	Wubu County	40	5.991	23516	8155	5.991	23516	8155	5.991	31671	0.257491	0.257491	12	401	18460
2016	Wubu County	40	6.891	25656	8881	6.891	25656	8881	6.891	34537	0.257145	0.257145	11	430	22925
2017	Wubu County	40	6.782			6.782	27796	9607	6.782	37403	0.256851	0.256851	12	500	25778
2018	Wubu County	40	12.169			12.169	29936	10333	12.169	40269	0.256599	0.256599	12	547	55558
2019	Wubu County	40	12.19			12.19	32076	11059	12.19	43135	0.256381	0.256381	12	629	55619
2020	Wubu County	40	12.088			12.088	34216	11785	12.088	46001	0.25619	0.25619	11	680	55680
2021	Wubu County	40				11.986	36356	12511	11.986	48867	0.256021	0.256021	12	743	55741
2012	Mizhi County	41	26.406	23178	7509	26.406	23178	7509	26.406	30687	0.244696	0.244696	9	331	83438
2013	Mizhi County	41	26.587	25681	8290	26.587	25681	8290	26.587	33971	0.244032	0.244032	11	385	85418
2014	Mizhi County	41	26.783	27710	8903	26.783	27710	8903	26.783	36613	0.243165	0.243165	10	401	88080
2015	Mizhi County	41	28.837	24667	8894	28.837	24667	8894	28.837	33561	0.26501	0.26501	11	343	87426
2016	Mizhi County	41	29.832	26813	9658	29.832	26813	9658	29.832	36471	0.264813	0.264813	10	370	100218
2017	Mizhi County	41	29.513			29.513	28959	10422	29.513	39381	0.264645	0.264645	11	396	106311
2018	Mizhi County	41	34.501			34.501	31105	11186	34.501	42291	0.264501	0.264501	11	475	133897
2019	Mizhi County	41	35.308			35.308	33251	11950	35.308	45201	0.264375	0.264375	11	541	133964
2020	Mizhi County	41	34.988			34.988	35397	12714	34.988	48111	0.264264	0.264264	10	519	134031
2021	Mizhi County	41				34.668	37543	13478	34.668	51021	0.264166	0.264166	11	578	134098
2012	Suide County	42	25.486	22708	6630	25.486	22708	6630	25.486	29338	0.225987	0.225987	10	257	87932
2013	Suide County	42	25.661	25138	7326	25.661	25138	7326	25.661	32464	0.225665	0.225665	11	291	87412
2014	Suide County	42	25.854	27426	8227	25.854	27426	8227	25.854	35653	0.230752	0.230752	11	292	89895
2015	Suide County	42	27.974	24664	8240	27.974	24664	8240	27.974	32904	0.250425	0.250425	11	318	83902
2016	Suide County	42	28.05	26760	8949	28.05	26760	8949	28.05	35709	0.250609	0.250609	11	362	90981
2017	Suide County	42	27.757			27.757	28856	9658	27.757	38514	0.250766	0.250766	11	409	95077
2018	Suide County	42	53.061			53.061	30952	10367	53.061	41319	0.250902	0.250902	11	507	243294
2019	Suide County	42	53.209			53.209	33048	11076	53.209	44124	0.25102	0.25102	11	489	243829
2020	Suide County	42	52.788			52.788	35144	11785	52.788	46929	0.251124	0.251124	11	540	244364
2021	Suide County	42				52.367	37240	12494	52.367	49734	0.251216	0.251216	11	600	244899
2012	Zizhou County	43	31.763	21967	6582	31.763	21967	6582	31.763	28549	0.230551	0.230551	9	197	110985
2013	Zizhou County	43	32.057	24406	7394	32.057	24406	7394	32.057	31800	0.232516	0.232516	11	237	102361
2014	Zizhou County	43	32.251	26822	8296	32.251	26822	8296	32.251	35118	0.236232	0.236232	11	256	105898
2015	Zizhou County	43	33.103	23598	8322	33.103	23598	8322	33.103	31920	0.260714	0.260714	11	216	70489
2016	Zizhou County	43	33.785	25768	9046	33.785	25768	9046	33.785	34814	0.259838	0.259838	11	273	101312
2017	Zizhou County	43	33.382			33.382	27938	9770	33.382	37708	0.259096	0.259096	11	306	104062
2018	Zizhou County	43	54.749			54.749	30108	10494	54.749	40602	0.25846	0.25846	11	312	183804
2019	Zizhou County	43	52.92			52.92	32278	11218	52.92	43496	0.257909	0.257909	11	294	177914
2020	Zizhou County	43	52.444			52.444	34448	11942	52.444	46390	0.257426	0.257426	10	333	172024
2021	Zizhou County	43				51.968	36618	12666	51.968	49284	0.257	0.257	11	378	166134
2012	Qingjian County	44	28.059	21675	6500	28.059	21675	6500	28.059	28175	0.230701	0.230701	10	163	71759
2013	Qingjian County	44	28.237	24124	7352	28.237	24124	7352	28.237	31476	0.233575	0.233575	12	189	72893
2014	Qingjian County	44	28.44	26705	8234	28.44	26705	8234	28.44	34939	0.235668	0.235668	11	209	75119
2015	Qingjian County	44	30.233	23529	8234	30.233	23529	8234	30.233	31763	0.259232	0.259232	12	218	84449
2016	Qingjian County	44	31.328	25459	8918	31.328	25459	8918	31.328	34377	0.259418	0.259418	11	233	79135
2017	Qingjian County	44	30.764			30.764	27389	9602	30.764	36991	0.259577	0.259577	12	272	83284
2018	Qingjian County	44	34.689			34.689	29319	10286	34.689	39605	0.259715	0.259715	12	311	109012
2019	Qingjian County	44	34.786			34.786	31249	10970	34.786	42219	0.259836	0.259836	12	326	109219
2020	Qingjian County	44	34.509			34.509	33179	11654	34.509	44833	0.259942	0.259942	11	341	109426
2021	Qingjian County	44				34.232	35109	12338	34.232	47447	0.260038	0.260038	12	376	109633
2012	Baota District	45		25520	7483		25520	7483	17.719	33003	0.226737	0.226737	9	572	90198
2013	Baota District	45		28378	8493		28378	8493	17.786	36871	0.230344	0.230344	11	609	85023
2014	Baota District	45		31358	9529		31358	9529	17.853	40887	0.233057	0.233057	10	684	89917
2015	Baota District	45		29777	9090		29777	9090	17.92	38867	0.233874	0.233874	11	758	88917
2016	Baota District	45		32039	9835		32039	9835	17.987	41874	0.234871	0.234871	11	717	90011
2017	Baota District	45					34301	10580	18.054	44881	0.235734	0.235734	11	819	92859
2018	Baota District	45					36563	11325	18.121	47888	0.236489	0.236489	11	925	72326
2019	Baota District	45					38825	12070	18.188	50895	0.237155	0.237155	11	1023	73613
2020	Baota District	45					41087	12815	18.255	53902	0.237746	0.237746	10	1036	74900
2021	Baota District	45					43349	13560	18.322	56909	0.238275	0.238275	11	1049	76187
2012	Zichang City	46	25.802	26387	7357	25.802	26387	7357	25.802	33744	0.218024	0.218024	9	311	77259
2013	Zichang City	46	25.412	29395	8357	25.412	29395	8357	25.412	37752	0.221366	0.221366	11	347	75025
2014	Zichang City	46	25.475	32570	9335	25.475	32570	9335	25.475	41905	0.222766	0.222766	10	339	77657
2015	Zichang City	46	25.611	28679	9021	25.611	28679	9021	25.611	37700	0.239284	0.239284	10	301	31848
2016	Zichang City	46	25.625	30772	9752	25.625	30772	9752	25.625	40524	0.240648	0.240648	10	313	75785
2017	Zichang City	46	25.628			25.628	32865	10483	25.628	43348	0.241834	0.241834	11	406	78154
2018	Zichang City	46	10.881			10.881	34958	11214	10.881	46172	0.242874	0.242874	10	478	42475
2019	Zichang City	46				-3.866	37051	11945	3.866	48996	0.243795	0.243795	11	464	43071
2020	Zichang City	46				-18.613	39144	12676	18.613	51820	0.244616	0.244616	10	417	43667
2021	Zichang City	46				-33.36	41237	13407	33.36	54644	0.245352	0.245352	11	566	44263
2012	Yanchuan County	47	16.966	20961	5815	16.966	20961	5815	16.966	26776	0.217172	0.217172	10	415	43263
2013	Yanchuan County	47	16.966	23497	6530	16.966	23497	6530	16.966	30027	0.217471	0.217471	12	477	40054
2014	Yanchuan County	47	16.966	26089	7634	16.966	26089	7634	16.966	33723	0.226374	0.226374	11	518	43018
2015	Yanchuan County	47	16.966	26212	8354	16.966	26212	8354	16.966	34566	0.241683	0.241683	12	355	26797
2016	Yanchuan County	47	16.966	28072	9063	16.966	28072	9063	16.966	37135	0.244055	0.244055	11	343	31767
2017	Yanchuan County	47	16.966			16.966	29932	9772	16.966	39704	0.246121	0.246121	12	406	31780
2018	Yanchuan County	47	5.574			5.574	31792	10481	5.574	42273	0.247936	0.247936	12	576	28916
2019	Yanchuan County	47	10.935			10.935	33652	11190	10.935	44842	0.249543	0.249543	12	501	30359
2020	Yanchuan County	47	11.0601			11.0601	35512	11899	11.0601	47411	0.250976	0.250976	11	513	31802
2021	Yanchuan County	47				11.1851	37372	12608	11.1851	49980	0.252261	0.252261	12	599	33245
2012	Yanchang County	48	10.03	22529	6282	10.03	22529	6282	10.03	28811	0.218042	0.218042	10	144	38374
2013	Yanchang County	48	10.329	25007	7124	10.329	25007	7124	10.329	32131	0.221717	0.221717	12	159	35598
2014	Yanchang County	48	10.423	27615	8007	10.423	27615	8007	10.423	35622	0.224777	0.224777	11	174	40077
2015	Yanchang County	48	10.654	27076	8671	10.654	27076	8671	10.654	35747	0.242566	0.242566	12	182	27832
2016	Yanchang County	48	10.806	29106	9286	10.806	29106	9286	10.806	38392	0.241873	0.241873	11	160	27047
2017	Yanchang County	48	10.821			10.821	31136	9901	10.821	41037	0.24127	0.24127	12	194	30027
2018	Yanchang County	48	15.398			15.398	33166	10516	15.398	43682	0.24074	0.24074	12	228	21603
2019	Yanchang County	48	5.76			5.76	35196	11131	5.76	46327	0.24027	0.24027	12	223	23191
2020	Yanchang County	48	5.85336			5.85336	37226	11746	5.85336	48972	0.239851	0.239851	11	228	24779
2021	Yanchang County	48				5.94672	39256	12361	5.94672	51617	0.239475	0.239475	12	289	26367
2012	Ansai District	49		26680	8046		26680	8046	33.87	34726	0.2317	0.2317	9	359	68568
2013	Ansai District	49		29695	9148		29695	9148		38843	0.235512	0.235512	10	354	65687
2014	Ansai District	49		32852	10374		32852	10374		43226	0.239994	0.239994	9	361	71490
2015	Ansai District	49		29801	10437		29801	10437		40238	0.259382	0.259382	10	329	69521
2016	Ansai District	49		31946	11271		31946	11271		43217	0.2608	0.2608	10	260	68243
2017	Ansai District	49					34091	12105		46196	0.262036	0.262036	10	310	68544
2018	Ansai District	49					36236	12939		49175	0.263122	0.263122	10	364	53285
2019	Ansai District	49					38381	13773		52154	0.264083	0.264083	10	389	53981
2020	Ansai District	49					40526	14607		55133	0.264941	0.264941	9	377	54677
2021	Ansai District	49					42671	15441		58112	0.265711	0.265711	10	494	55373
2012	Zhidan County	50	17.574	26670	7872	17.574	26670	7872	17.574	34542	0.227896	0.227896	8	464	55146
2013	Zhidan County	50	17.993	30004	8872	17.993	30004	8872	17.993	38876	0.228213	0.228213	10	443	51455
2014	Zhidan County	50	18.2	33403	10001	18.2	33403	10001	18.2	43404	0.230417	0.230417	9	439	53180
2015	Zhidan County	50	18.74	29547	9971	18.74	29547	9971	18.74	39518	0.252315	0.252315	9	355	54024
2016	Zhidan County	50	19.814	31585	10688	19.814	31585	10688	19.814	42273	0.252833	0.252833	9	285	56488
2017	Zhidan County	50	19.82			19.82	33623	11405	19.82	45028	0.253287	0.253287	9	351	56573
2018	Zhidan County	50	18.553			18.553	35661	12122	18.553	47783	0.253689	0.253689	9	395	70612
2019	Zhidan County	50	18.659			18.659	37699	12839	18.659	50538	0.254046	0.254046	9	426	71587
2020	Zhidan County	50				18.765	39737	13556	18.765	53293	0.254367	0.254367	9	373	72562
2021	Zhidan County	50				18.871	41775	14273	18.871	56048	0.254657	0.254657	10	518	73537
2012	Wuqi County	51		26744	8005		26744	8005	16.6455	34749	0.230366	0.230366	8	531	58662
2013	Wuqi County	51		29873	9110		29873	9110	16.794	38983	0.233692	0.233692	9	553	56742
2014	Wuqi County	51		33198	10358		33198	10358	16.9425	43556	0.237809	0.237809	8	558	62146
2015	Wuqi County	51		30168	10302		30168	10302	17.091	40470	0.254559	0.254559	9	371	61065
2016	Wuqi County	51		32218	11064		32218	11064	17.2395	43282	0.255626	0.255626	9	287	62318
2017	Wuqi County	51					34268	11826	17.388	46094	0.256563	0.256563	9	357	69380
2018	Wuqi County	51					36318	12588	17.5365	48906	0.257392	0.257392	9	398	68931
2019	Wuqi County	51					38368	13350	17.685	51718	0.258131	0.258131	9	472	70610
2020	Wuqi County	51					40418	14112	17.8335	54530	0.258793	0.258793	8	396	72289
2021	Wuqi County	51					42468	14874	17.982	57342	0.259391	0.259391	9	556	73968
2012	Ganquan County	52	8.994	23108	7689	8.994	23108	7689	8.994	30797	0.249667	0.249667	9	90	41577
2013	Ganquan County	52	9.266	25835	8642	9.266	25835	8642	9.266	34477	0.25066	0.25066	11	94	39597
2014	Ganquan County	52	9.409	28607	9662	9.409	28607	9662	9.409	38269	0.252476	0.252476	10	99	42427
2015	Ganquan County	52	9.659	27291	9778	9.659	27291	9778	9.659	37069	0.263778	0.263778	10	95	43489
2016	Ganquan County	52	9.514	29419	10462	9.514	29419	10462	9.514	39881	0.26233	0.26233	10	91	49973
2017	Ganquan County	52	9.511			9.511	31547	11146	9.511	42693	0.261073	0.261073	10	103	47180
2018	Ganquan County	52	7.445			7.445	33675	11830	7.445	45505	0.259971	0.259971	10	117	44627
2019	Ganquan County	52	7.711			7.711	35803	12514	7.711	48317	0.258998	0.258998	10	128	45270
2020	Ganquan County	52				7.977	37931	13198	7.977	51129	0.258131	0.258131	10	127	45913
2021	Ganquan County	52				8.243	40059	13882	8.243	53941	0.257355	0.257355	11	146	46556
2012	Luochuan County	53	12.622	23294	9278	12.622	23294	9278	12.622	32572	0.284846	0.284846	10	1189	94413
2013	Luochuan County	53	12.884	26136	10410	12.884	26136	10410	12.884	36546	0.284846	0.284846	11	1380	94540
2014	Luochuan County	53	12.815	28993	11742	12.815	28993	11742	12.815	40735	0.288253	0.288253	11	1280	99282
2015	Luochuan County	53	12.856	28086	10785	12.856	28086	10785	12.856	38871	0.277456	0.277456	11	1035	99886
2016	Luochuan County	53	12.827	29967	11713	12.827	29967	11713	12.827	41680	0.281022	0.281022	11	847	105975
2017	Luochuan County	53	12.754			12.754	31848	12641	12.754	44489	0.284138	0.284138	11	836	105112
2018	Luochuan County	53	11.838			11.838	33729	13569	11.838	47298	0.286883	0.286883	11	1362	106124
2019	Luochuan County	53	11.938			11.938	35610	14497	11.938	50107	0.289321	0.289321	11	1361	106324
2020	Luochuan County	53				12.038	37491	15425	12.038	52916	0.2915	0.2915	11	1348	106524
2021	Luochuan County	53				12.138	39372	16353	12.138	55725	0.293459	0.293459	11	1557	106724
2012	Fu County	54	6.254	21647	8084	6.254	21647	8084	6.254	29731	0.271905	0.271905	9	72	37304
2013	Fu County	54		24331	9086	6.2475	24331	9086	6.2475	33417	0.271898	0.271898	11	78	35389
2014	Fu County	54	6.241	27136	10313	6.241	27136	10313	6.241	37449	0.275388	0.275388	10	93	35010
2015	Fu County	54	6.312	26552	10282	6.312	26552	10282	6.312	36834	0.279144	0.279144	10	98	36426
2016	Fu County	54	6.448	28649	11134	6.448	28649	11134	6.448	39783	0.279868	0.279868	11	107	36426
2017	Fu County	54	6.286			6.286	30746	11986	6.286	42732	0.280492	0.280492	11	127	36609
2018	Fu County	54	5.647			5.647	32843	12838	5.647	45681	0.281036	0.281036	10	150	32950
2019	Fu County	54	5.733			5.733	34940	13690	5.733	48630	0.281513	0.281513	11	159	33290
2020	Fu County	54				5.819	37037	14542	5.819	51579	0.281936	0.281936	10	173	33630
2021	Fu County	54				5.905	39134	15394	5.905	54528	0.282314	0.282314	11	199	33970
2012	Huangling County	55	10.354	24479	8974	10.354	24479	8974	10.354	33453	0.268257	0.268257	10	452	46616
2013	Huangling County	55	10.431	27392	10096	10.431	27392	10096	10.431	37488	0.269313	0.269313	11	475	45638
2014	Huangling County	55	10.345	30213	11267	10.345	30213	11267	10.345	41480	0.271625	0.271625	10	487	47939
2015	Huangling County	55	10.067	27784	10581	10.067	27784	10581	10.067	38365	0.275798	0.275798	11	377	50013
2016	Huangling County	55	10.002	29922	11405	10.002	29922	11405	10.002	41327	0.27597	0.27597	11	419	49456
2017	Huangling County	55	9.894			9.894	32060	12229	9.894	44289	0.276118	0.276118	11	524	45752
2018	Huangling County	55	7.819			7.819	34198	13053	7.819	47251	0.276248	0.276248	10	666	53289
2019	Huangling County	55	7.952			7.952	36336	13877	7.952	50213	0.276363	0.276363	11	813	53580
2020	Huangling County	55				8.085	38474	14701	8.085	53175	0.276465	0.276465	10	739	53871
2021	Huangling County	55				8.218	40612	15525	8.218	56137	0.276556	0.276556	11	39	54162
2012	Huanglong County	56	10.202	17671	6766	10.202	17671	6766	10.202	24437	0.276875	0.276875	9	37	77375
2013	Huanglong County	56	11.004	19721	7585	11.004	19721	7585	11.004	27306	0.277778	0.277778	11	40	82121
2014	Huanglong County	56	11.197	21975	8503	11.197	21975	8503	11.197	30478	0.278988	0.278988	10	48	86149
2015	Huanglong County	56	11.242	24889	8958	11.242	24889	8958	11.242	33847	0.264662	0.264662	10	51	95918
2016	Huanglong County	56	10.587	26879	9710	10.587	26879	9710	10.587	36589	0.26538	0.26538	10	56	90572
2017	Huanglong County	56	9.477			9.477	28869	10462	9.477	39331	0.265999	0.265999	10	62	69900
2018	Huanglong County	56	8.829			8.829	30859	11214	8.829	42073	0.266537	0.266537	10	68	73192
2019	Huanglong County	56	8.959			8.959	32849	11966	8.959	44815	0.267009	0.267009	10	71	73495
2020	Huanglong County	56				9.089	34839	12718	9.089	47557	0.267426	0.267426	10	82	73798
2021	Huanglong County	56				9.219	36829	13470	9.219	50299	0.267799	0.267799	10	68	74101
2012	Yichuan County	57	6.786	22972	7565	6.786	22972	7565	6.786	30537	0.247732	0.247732	10	71	37083
2013	Yichuan County	57	6.804	25867	8496	6.804	25867	8496	6.804	34363	0.247243	0.247243	11	77	36614
2014	Yichuan County	57	6.784	28772	9626	6.784	28772	9626	6.784	38398	0.25069	0.25069	10	86	37235
2015	Yichuan County	57	6.748	27237	9644	6.748	27237	9644	6.748	36881	0.26149	0.26149	11	95	36322
2016	Yichuan County	57	6.77	29252	10376	6.77	29252	10376	6.77	39628	0.261835	0.261835	11	103	35047
2017	Yichuan County	57	6.729			6.729	31267	11108	6.729	42375	0.262136	0.262136	11	123	35217
2018	Yichuan County	57	4.185			4.185	33282	11840	4.185	45122	0.2624	0.2624	11	129	27251
2019	Yichuan County	57	4.206			4.206	35297	12572	4.206	47869	0.262633	0.262633	11	144	27282
2020	Yichuan County	57				4.227	37312	13304	4.227	50616	0.262842	0.262842	11	155	27313
2021	Yichuan County	57				4.248	39327	14036	4.248	53363	0.263029	0.263029	11	72	27344
2012	Yijun County	58	16.186	20922	6477	16.186	20922	6477	16.186	27399	0.236395	0.236395	10	169	97446
2013	Yijun County	58	15.96	23516	7423	15.96	23516	7423	15.96	30939	0.239924	0.239924	12	193	99645
2014	Yijun County	58	15.962	26246	8417	15.962	26246	8417	15.962	34663	0.242824	0.242824	11	212	97536
2015	Yijun County	58	17.624	22949	7888	17.624	22949	7888	17.624	30837	0.255797	0.255797	11	216	100782
2016	Yijun County	58	18.1	24751	8547	18.1	24751	8547	18.1	33298	0.256682	0.256682	11	248	104358
2017	Yijun County	58	18.414			18.414	26553	9206	18.414	35759	0.257446	0.257446	11	199	106418
2018	Yijun County	58	26.195			26.195	28355	9865	26.195	38220	0.258111	0.258111	11	217	159268
2019	Yijun County	58	26.622			26.622	30157	10524	26.622	40681	0.258696	0.258696	11	244	162215
2020	Yijun County	58	26.6237			26.6237	31959	11183	26.6237	43142	0.259214	0.259214	11	290	165162
2021	Yijun County	58				26.6253	33761	11842	26.6253	45603	0.259676	0.259676	11	864	168109
2012	Yaozhou District	59	29.311	25358	7975	29.311	25358	7975	29.311	33333	0.239252	0.239252	11	912	84401
2013	Yaozhou District	59	29.796	28528	9099	29.796	28528	9099	29.796	37627	0.241821	0.241821	12	934	83819
2014	Yaozhou District	59	29.921	31894	10227	29.921	31894	10227	29.921	42121	0.242801	0.242801	12	880	90347
2015	Yaozhou District	59	29.798	28150	9386	29.798	28150	9386	29.798	37536	0.250053	0.250053	12	795	87955
2016	Yaozhou District	59	30.3	30436	10181	30.3	30436	10181	30.3	40617	0.250659	0.250659	12	910	89248
2017	Yaozhou District	59	30.457			30.457	32722	10976	30.457	43698	0.251179	0.251179	12	832	89983
2018	Yaozhou District	59	25.643			25.643	35008	11771	25.643	46779	0.25163	0.25163	12	1090	79246
2019	Yaozhou District	59	25.432			25.432	37294	12566	25.432	49860	0.252026	0.252026	12	1183	73063
2020	Yaozhou District	59				25.221	39580	13361	25.221	52941	0.252375	0.252375	11	1347	66880
2021	Yaozhou District	59				25.01	41866	14156	25.01	56022	0.252686	0.252686	12	398	60697
2012	Wangyi District	60	3.79	22218	8068	3.79	22218	8068	3.79	30286	0.266394	0.266394	11	4511	11256
2013	Wangyi District	60	3.803	24995	9189	3.803	24995	9189	3.803	34184	0.26881	0.26881	13	5065	10182
2014	Wangyi District	60	3.823	27992	10398	3.823	27992	10398	3.823	38390	0.270852	0.270852	12	5171	9967
2015	Wangyi District	60	3.853	25013	8499	3.853	25013	8499	3.853	33512	0.253611	0.253611	12	5409	10559
2016	Wangyi District	60	3.861	27053	9201	3.861	27053	9201	3.861	36254	0.253793	0.253793	13	6179	10235
2017	Wangyi District	60	3.857			3.857	29093	9903	3.857	38996	0.253949	0.253949	12	5379	10363
2018	Wangyi District	60	3.45			3.45	31133	10605	3.45	41738	0.254085	0.254085	12	5229	9477
2019	Wangyi District	60	3.361			3.361	33173	11307	3.361	44480	0.254204	0.254204	12	5718	8503
2020	Wangyi District	60				3.272	35213	12009	3.272	47222	0.254309	0.254309	12	6207	7529
2021	Wangyi District	60				3.183	37253	12711	3.183	49964	0.254403	0.254403	12	4317	6555
2012	Yintai District	61	9.991	21325	6863	9.991	21325	6863	9.991	28188	0.243472	0.243472	11	1307	38450
2013	Yintai District	61	10.205	23778	7879	10.205	23778	7879	10.205	31657	0.248887	0.248887	13	1238	37361
2014	Yintai District	61	10.351	26348	8934	10.351	26348	8934	10.351	35282	0.253217	0.253217	12	1049	36091
2015	Yintai District	61	10.395	23654	8175	10.395	23654	8175	10.395	31829	0.256841	0.256841	12	1005	35691
2016	Yintai District	61	10.407	25464	8919	10.407	25464	8919	10.407	34383	0.259401	0.259401	12	1022	36198
2017	Yintai District	61	10.595			10.595	27274	9663	10.595	36937	0.261608	0.261608	12	1219	36086
2018	Yintai District	61	11.192			11.192	29084	10407	11.192	39491	0.263528	0.263528	12	981	39804
2019	Yintai District	61	10.574			10.574	30894	11151	10.574	42045	0.265216	0.265216	12	1003	38606
2020	Yintai District	61				9.956	32704	11895	9.956	44599	0.26671	0.26671	12	1026	37408
2021	Yintai District	61				9.338	34514	12639	9.338	47153	0.268042	0.268042	12	882	36210
2012	Baishui County	62	28.238	20922	6242	28.238	20922	6242	28.238	27164	0.229789	0.229789	12	638	117880
2013	Baishui County	62	28.059	23202	7215	28.059	23202	7215	28.059	30417	0.237203	0.237203	14	691	110759
2014	Baishui County	62	27.516	25824	8218	27.516	25824	8218	27.516	34042	0.241408	0.241408	13	641	105208
2015	Baishui County	62	27.874	23923	8314	27.874	23923	8314	27.874	32237	0.257902	0.257902	13	656	111623
2016	Baishui County	62	27.999	25754	9046	27.999	25754	9046	27.999	34800	0.259943	0.259943	13	752	109070
2017	Baishui County	62	28.224			28.224	27585	9778	28.224	37363	0.261703	0.261703	13	807	109004
2018	Baishui County	62	24.728			24.728	29416	10510	24.728	39926	0.263237	0.263237	13	864	102598
2019	Baishui County	62	24.722			24.722	31247	11242	24.722	42489	0.264586	0.264586	13	860	102180
2020	Baishui County	62	24.9527			24.9527	33078	11974	24.9527	45052	0.265782	0.265782	13	958	101762
2021	Baishui County	62				25.1833	34909	12706	25.1833	47615	0.266849	0.266849	13	788	101344
2012	Chengcheng County	63	43.71	22079	5938	43.71	22079	5938	43.71	28017	0.211943	0.211943	12	740	177655
2013	Chengcheng County	63	43.574	24750	6800	43.574	24750	6800	43.574	31550	0.215531	0.215531	14	761	175100
2014	Chengcheng County	63	43.397	27374	7691	43.397	27374	7691	43.397	35065	0.219336	0.219336	13	734	167304
2015	Chengcheng County	63	43.396	25219	7687	43.396	25219	7687	43.396	32906	0.233605	0.233605	13	705	178561
2016	Chengcheng County	63	43.337	27124	8302	43.337	27124	8302	43.337	35426	0.234348	0.234348	14	764	175553
2017	Chengcheng County	63	42.938			42.938	29029	8917	42.938	37946	0.234992	0.234992	14	784	172478
2018	Chengcheng County	63	41.121			41.121	30934	9532	41.121	40466	0.235556	0.235556	14	879	181348
2019	Chengcheng County	63	41.061			41.061	32839	10147	41.061	42986	0.236054	0.236054	14	924	168719
2020	Chengcheng County	63	41.1613			41.1613	34744	10762	41.1613	45506	0.236496	0.236496	13	1014	156090
2021	Chengcheng County	63				41.2615	36649	11377	41.2615	48026	0.236893	0.236893	13	2079	143461
2012	Hancheng City	64	23.47	24717	8852	23.47	24717	8852	23.47	33569	0.263696	0.263696	11	1740	83268
2013	Hancheng City	64	23.36	27312	10179	23.36	27312	10179	23.36	37491	0.271505	0.271505	13	1869	77600
2014	Hancheng City	64	22.95	30071	11400	22.95	30071	11400	22.95	41471	0.274891	0.274891	12	1920	72790
2015	Hancheng City	64	21.37	27504	11429	21.37	27504	11429	21.37	38933	0.293556	0.293556	13	1976	72576
2016	Hancheng City	64	21.29	29784	12400	21.29	29784	12400	21.29	42184	0.29395	0.29395	13	2153	68721
2017	Hancheng City	64	19.94			19.94	32064	13371	19.94	45435	0.294289	0.294289	13	2276	65086
2018	Hancheng City	64	14.29			14.29	34344	14342	14.29	48686	0.294582	0.294582	13	2171	48539
2019	Hancheng City	64	14.25			14.25	36624	15313	14.25	51937	0.294838	0.294838	13	2088	49250
2020	Hancheng City	64	14.4555			14.4555	38904	16284	14.4555	55188	0.295064	0.295064	12	2310	49961
2021	Hancheng City	64				14.6609	41184	17255	14.6609	58439	0.295265	0.295265	13	536	50672
2012	Heyang County	65	50.755	20784	5912	50.755	20784	5912	50.755	26696	0.221456	0.221456	13	353	220180
2013	Heyang County	65	50.709	23133	6785	50.709	23133	6785	50.709	29918	0.226787	0.226787	15	418	207000
2014	Heyang County	65	50.459	25563	7620	50.459	25563	7620	50.459	33183	0.229636	0.229636	14	472	197372
2015	Heyang County	65	49.596	23749	7646	49.596	23749	7646	49.596	31395	0.243542	0.243542	14	497	206254
2016	Heyang County	65	50.098	25495	8311	50.098	25495	8311	50.098	33806	0.245844	0.245844	14	524	203091
2017	Heyang County	65	50.164			50.164	27241	8976	50.164	36217	0.247839	0.247839	14	546	204038
2018	Heyang County	65	50.604			50.604	28987	9641	50.604	38628	0.249586	0.249586	14	643	219724
2019	Heyang County	65	50.504			50.504	30733	10306	50.504	41039	0.251127	0.251127	14	676	229790
2020	Heyang County	65	50.8029			50.8029	32479	10971	50.8029	43450	0.252497	0.252497	14	731	239856
2021	Heyang County	65				51.1018	34225	11636	51.1018	45861	0.253723	0.253723	14	786	249922
2012	Xunyi County	66	20.973	21403	6662	20.973	21403	6662	20.973	28065	0.237378	0.237378	10	565	126735
2013	Xunyi County	66	20.602	23715	7701	20.602	23715	7701	20.602	31416	0.24513	0.24513	11	641	118923
2014	Xunyi County	66	20.216	26229	8741	20.216	26229	8741	20.216	34970	0.249957	0.249957	10	579	108028
2015	Xunyi County	66	20.14	23789	8208	20.14	23789	8208	20.14	31997	0.256524	0.256524	10	601	112523
2016	Xunyi County	66	20.704	25719	8951	20.704	25719	8951	20.704	34670	0.258177	0.258177	11	688	110004
2017	Xunyi County	66	20.167			20.167	27649	9694	20.167	37343	0.259593	0.259593	11	533	105721
2018	Xunyi County	66	19.673			19.673	29579	10437	19.673	40016	0.260821	0.260821	10	488	105319
2019	Xunyi County	66	20.06			20.06	31509	11180	20.06	42689	0.261894	0.261894	10	493	123992
2020	Xunyi County	66				20.447	33439	11923	20.447	45362	0.262841	0.262841	10	585	142665
2021	Xunyi County	66				20.834	35369	12666	20.834	48035	0.263683	0.263683	11	246	161338
2012	Changwu County	67	12.066	22021	6622	12.066	22021	6622	12.066	28643	0.231191	0.231191	11	927	62665
2013	Changwu County	67	12.144	24399	7556	12.144	24399	7556	12.144	31955	0.236458	0.236458	13	1069	58921
2014	Changwu County	67	12.016	26936	8508	12.016	26936	8508	12.016	35444	0.240041	0.240041	12	1214	55175
2015	Changwu County	67	11.983	24420	7987	11.983	24420	7987	11.983	32407	0.246459	0.246459	12	1287	58666
2016	Changwu County	67	12.215	26401	8702	12.215	26401	8702	12.215	35103	0.247899	0.247899	12	1689	54793
2017	Changwu County	67	12.279			12.279	28382	9417	12.279	37799	0.249134	0.249134	12	1769	56266
2018	Changwu County	67	12.081			12.081	30363	10132	12.081	40495	0.250204	0.250204	12	1800	55669
2019	Changwu County	67	12.124			12.124	32344	10847	12.124	43191	0.25114	0.25114	12	1746	54281
2020	Changwu County	67				12.167	34325	11562	12.167	45887	0.251967	0.251967	12	2083	52893
2021	Changwu County	67				12.21	36306	12277	12.21	48583	0.252702	0.252702	12	614	51505
2012	Yongshou County	68	18.623	21256	6391	18.623	21256	6391	18.623	27647	0.231164	0.231164	11	465	84735
2013	Yongshou County	68	19.134	23530	7317	19.134	23530	7317	19.134	30847	0.237203	0.237203	13	504	82000
2014	Yongshou County	68	18.939	26024	8232	18.939	26024	8232	18.939	34256	0.240308	0.240308	12	562	81018
2015	Yongshou County	68	18.915	23577	7720	18.915	23577	7720	18.915	31297	0.246669	0.246669	12	659	89068
2016	Yongshou County	68	19.271	25490	8419	19.271	25490	8419	19.271	33909	0.248282	0.248282	13	822	87605
2017	Yongshou County	68	19.197			19.197	27403	9118	19.197	36521	0.249665	0.249665	12	961	86696
2018	Yongshou County	68	19.136			19.136	29316	9817	19.136	39133	0.250862	0.250862	12	949	84687
2019	Yongshou County	68	19.19			19.19	31229	10516	19.19	41745	0.25191	0.25191	12	952	80642
2020	Yongshou County	68				19.244	33142	11215	19.244	44357	0.252835	0.252835	12	1064	76597
2021	Yongshou County	68				19.298	35055	11914	19.298	46969	0.253657	0.253657	12	1532	72552
2012	Binzhou City	69		25217	7835	27.89	25217	7835	27.89	33052	0.237051	0.237051	11	1398	129983
2013	Binzhou City	69		28041	9058	27.678	28041	9058	27.678	37099	0.244158	0.244158	12	1576	118286
2014	Binzhou City	69		31126	10271	27.466	31126	10271	27.466	41397	0.24811	0.24811	11	1435	115331
2015	Binzhou City	69		28277	9640	27.254	28277	9640	27.254	37917	0.25424	0.25424	12	1595	125622
2016	Binzhou City	69		30515	10453	27.042	30515	10453	27.042	40968	0.25515	0.25515	12	1804	123049
2017	Binzhou City	69				26.83	32753	11266	26.83	44019	0.255935	0.255935	12	1834	121458
2018	Binzhou City	69	26.618			26.618	34991	12079	26.618	47070	0.256618	0.256618	12	1952	116741
2019	Binzhou City	69	26.406			26.406	37229	12892	26.406	50121	0.257218	0.257218	12	1826	111782
2020	Binzhou City	69	26.461			26.461	39467	13705	26.461	53172	0.257748	0.257748	11	2282	106823
2021	Binzhou City	69				26.516	41705	14518	26.516	56223	0.258222	0.258222	12	360	101864
2012	Chunhua County	70	17.24	20173	6572	17.24	20173	6572	17.24	26745	0.245728	0.245728	11	523	124294
2013	Chunhua County	70	23.553	22311	7518	23.553	22311	7518	23.553	29829	0.252037	0.252037	13	545	115544
2014	Chunhua County	70	23.24	24654	8451	23.24	24654	8451	23.24	33105	0.255279	0.255279	12	584	110000
2015	Chunhua County	70	23.148	22346	7929	23.148	22346	7929	23.148	30275	0.261899	0.261899	12	660	118043
2016	Chunhua County	70	23.679	25240	8639	23.679	25240	8639	23.679	33879	0.254996	0.254996	12	761	115709
2017	Chunhua County	70	23.637			23.637	28134	9349	23.637	37483	0.24942	0.24942	12	774	113476
2018	Chunhua County	70	23.468			23.468	31028	10059	23.468	41087	0.244822	0.244822	12	789	112614
2019	Chunhua County	70	23.657			23.657	33922	10769	23.657	44691	0.240966	0.240966	12	834	108929
2020	Chunhua County	70				23.846	36816	11479	23.846	48295	0.237685	0.237685	12	923	105244
2021	Chunhua County	70				24.035	39710	12189	24.035	51899	0.23486	0.23486	12	419	101559
2012	Linyou County	71	20.897	21215	6696	20.897	21215	6696	20.897	27911	0.239905	0.239905	10	297	63284
2013	Linyou County	71	20.999	23676	7580	20.999	23676	7580	20.999	31256	0.242513	0.242513	12	327	60236
2014	Linyou County	71	21.37	26304	8512	21.37	26304	8512	21.37	34816	0.244485	0.244485	11	378	66326
2015	Linyou County	71	22.281	25046	7518	22.281	25046	7518	22.281	32564	0.230868	0.230868	11	417	72780
2016	Linyou County	71	22.708	26974	8157	22.708	26974	8157	22.708	35131	0.232188	0.232188	12	625	78558
2017	Linyou County	71	22.485			22.485	28902	8796	22.485	37698	0.233328	0.233328	11	644	73787
2018	Linyou County	71	22.065			22.065	30830	9435	22.065	40265	0.234323	0.234323	11	825	73523
2019	Linyou County	71	22.457			22.457	32758	10074	22.457	42832	0.235198	0.235198	11	753	74384
2020	Linyou County	71				22.849	34686	10713	22.849	45399	0.235974	0.235974	11	1050	75245
2021	Linyou County	71				23.241	36614	11352	23.241	47966	0.236668	0.236668	11	650	76106
2012	Feng County	72	6.336	27550	9061	6.336	27550	9061	6.336	36611	0.247494	0.247494	9	409	28714
2013	Feng County	72	5.912	30415	10402	5.912	30415	10402	5.912	40817	0.254845	0.254845	10	457	22025
2014	Feng County	72	5.982	33548	11765	5.982	33548	11765	5.982	45313	0.259639	0.259639	9	466	22389
2015	Feng County	72	6.106	30432	10236	6.106	30432	10236	6.106	40668	0.251697	0.251697	10	536	23637
2016	Feng County	72	6.118	32715	11055	6.118	32715	11055	6.118	43770	0.25257	0.25257	10	565	23282
2017	Feng County	72	5.995			5.995	34998	11874	5.995	46872	0.253328	0.253328	10	420	23000
2018	Feng County	72	6.162			6.162	37281	12693	6.162	49974	0.253992	0.253992	9	244	23828
2019	Feng County	72	6.072			6.072	39564	13512	6.072	53076	0.254578	0.254578	9	251	23924
2020	Feng County	72				5.982	41847	14331	5.982	56178	0.2551	0.2551	9	287	24020
2021	Feng County	72				5.892	44130	15150	5.892	59280	0.255567	0.255567	9	43	24116
2012	Taibai County	73	2.148	20713	6610	2.148	20713	6610	2.148	27323	0.241921	0.241921	7	59	7331
2013	Taibai County	73	2.219	23054	7476	2.219	23054	7476	2.219	30530	0.244874	0.244874	8	63	6370
2014	Taibai County	73	2.164	25497	8463	2.164	25497	8463	2.164	33960	0.249205	0.249205	8	73	6405
2015	Taibai County	73	2.188	24295	7540	2.188	24295	7540	2.188	31835	0.236846	0.236846	8	78	7592
2016	Taibai County	73	2.111	26214	8181	2.111	26214	8181	2.111	34395	0.237854	0.237854	8	76	7380
2017	Taibai County	73	2.051			2.051	28133	8822	2.051	36955	0.238723	0.238723	8	103	7059
2018	Taibai County	73	1.973			1.973	30052	9463	1.973	39515	0.239479	0.239479	8	112	6721
2019	Taibai County	73	1.923			1.923	31971	10104	1.923	42075	0.240143	0.240143	8	139	6756
2020	Taibai County	73	1.92534			1.92534	33890	10745	1.92534	44635	0.24073	0.24073	8	169	6791
2021	Taibai County	73				1.92769	35809	11386	1.92769	47195	0.241254	0.241254	8	223	6826
2012	Lueyang County	74	20.267	19930	5654	20.267	19930	5654	20.267	25584	0.220997	0.220997	11	233	46939
2013	Lueyang County	74	20.294	22270	6468	20.294	22270	6468	20.294	28738	0.225068	0.225068	13	223	47532
2014	Lueyang County	74	20.243	24675	7276	20.243	24675	7276	20.243	31951	0.227724	0.227724	12	178	47119
2015	Lueyang County	74	20.314	23357	8043	20.314	23357	8043	20.314	31400	0.256146	0.256146	12	198	48168
2016	Lueyang County	74	20.169	25282	8714	20.169	25282	8714	20.169	33996	0.256324	0.256324	12	239	48421
2017	Lueyang County	74	20.1676			20.1676	27207	9385	20.1676	36592	0.256477	0.256477	12	256	49104
2018	Lueyang County	74	17.2714			17.2714	29132	10056	17.2714	39188	0.256609	0.256609	12	251	43783
2019	Lueyang County	74	17.275			17.275	31057	10727	17.275	41784	0.256725	0.256725	12	225	44624
2020	Lueyang County	74	17.3523			17.3523	32982	11398	17.3523	44380	0.256827	0.256827	12	246	45465
2021	Lueyang County	74				17.4296	34907	12069	17.4296	46976	0.256918	0.256918	12	171	46306
2012	Ningqiang County	75	30.898	20018	5754	30.898	20018	5754	30.898	25772	0.223266	0.223266	12	171	82208
2013	Ningqiang County	75	30.938	22489	6548	30.938	22489	6548	30.938	29037	0.225505	0.225505	13	190	83255
2014	Ningqiang County	75	30.818	24985	7373	30.818	24985	7373	30.818	32358	0.227857	0.227857	12	197	82549
2015	Ningqiang County	75	30.84	23602	8068	30.84	23602	8068	30.84	31670	0.254752	0.254752	13	219	85233
2016	Ningqiang County	75	30.784	25599	8746	30.784	25599	8746	30.784	34345	0.254651	0.254651	13	256	85656
2017	Ningqiang County	75	30.8464			30.8464	27596	9424	30.8464	37020	0.254565	0.254565	13	273	87409
2018	Ningqiang County	75	27.1021			27.1021	29593	10102	27.1021	39695	0.25449	0.25449	12	307	76834
2019	Ningqiang County	75	27.144			27.144	31590	10780	27.144	42370	0.254425	0.254425	12	327	78177
2020	Ningqiang County	75	27.2225			27.2225	33587	11458	27.2225	45045	0.254368	0.254368	12	383	79520
2021	Ningqiang County	75				27.3009	35584	12136	27.3009	47720	0.254317	0.254317	12	15	80863
2012	Foping County	76	2.803	18911	5473	2.803	18911	5473	2.803	24384	0.22445	0.22445	9	45	8550
2013	Foping County	76	2.804	21309	6272	2.804	21309	6272	2.804	27581	0.227403	0.227403	11	52	8658
2014	Foping County	76	2.794	23674	7050	2.794	23674	7050	2.794	30724	0.229462	0.229462	10	57	8581
2015	Foping County	76	2.801	23257	8030	2.801	23257	8030	2.801	31287	0.256656	0.256656	10	67	9063
2016	Foping County	76	2.795	25094	8745	2.795	25094	8745	2.795	33839	0.25843	0.25843	11	77	9099
2017	Foping County	76	2.80335			2.80335	26931	9460	2.80335	36391	0.259954	0.259954	10	85	9264
2018	Foping County	76	2.63608			2.63608	28768	10175	2.63608	38943	0.261279	0.261279	10	90	9055
2019	Foping County	76	2.639			2.639	30605	10890	2.639	41495	0.262441	0.262441	10	94	9186
2020	Foping County	76	2.66681			2.66681	32442	11605	2.66681	44047	0.263469	0.263469	10	103	9317
2021	Foping County	76				2.69463	34279	12320	2.69463	46599	0.264383	0.264383	10	69	9448
2012	Liuba County	77	3.191	18948	5471	3.191	18948	5471	3.191	24419	0.224047	0.224047	10	54	11748
2013	Liuba County	77	3.191	21325	6231	3.191	21325	6231	3.191	27556	0.226121	0.226121	11	62	11897
2014	Liuba County	77	3.18	23649	7047	3.18	23649	7047	3.18	30696	0.229574	0.229574	10	65	11691
2015	Liuba County	77	3.182	23242	8015	3.182	23242	8015	3.182	31257	0.256423	0.256423	11	72	12072
2016	Liuba County	77	3.162	25125	8712	3.162	25125	8712	3.162	33837	0.25747	0.25747	11	80	12113
2017	Liuba County	77	3.17142			3.17142	27008	9409	3.17142	36417	0.258368	0.258368	11	86	12323
2018	Liuba County	77	2.67935			2.67935	28891	10106	2.67935	38997	0.259148	0.259148	10	95	9726
2019	Liuba County	77	2.683			2.683	30774	10803	2.683	41577	0.259831	0.259831	10	101	9869
2020	Liuba County	77	2.70708			2.70708	32657	11500	2.70708	44157	0.260434	0.260434	10	112	10012
2021	Liuba County	77				2.73116	34540	12197	2.73116	46737	0.260971	0.260971	11	280	10155
2012	Xixiang County	78	30.076	20068	5788	30.076	20068	5788	30.076	25856	0.223855	0.223855	12	200	98264
2013	Xixiang County	78	30.112	22405	6662	30.112	22405	6662	30.112	29067	0.229195	0.229195	13	231	99524
2014	Xixiang County	78	29.996	24914	7541	29.996	24914	7541	29.996	32455	0.232352	0.232352	13	250	98670
2015	Xixiang County	78	30.162	23612	8180	30.162	23612	8180	30.162	31792	0.257297	0.257297	13	279	102531
2016	Xixiang County	78	30.177	25605	8875	30.177	25605	8875	30.177	34480	0.257396	0.257396	13	313	102853
2017	Xixiang County	78	30.238			30.238	27598	9570	30.238	37168	0.25748	0.25748	13	341	104724
2018	Xixiang County	78	26.5522			26.5522	29591	10265	26.5522	39856	0.257552	0.257552	13	359	96384
2019	Xixiang County	78	26.59			26.59	31584	10960	26.59	42544	0.257616	0.257616	13	375	97521
2020	Xixiang County	78	26.6779			26.6779	33577	11655	26.6779	45232	0.257672	0.257672	13	412	98658
2021	Xixiang County	78				26.7659	35570	12350	26.7659	47920	0.257721	0.257721	13	125	99795
2012	Zhenba County	79	38.552	19096	5470	38.552	19096	5470	38.552	24566	0.222665	0.222665	11	141	86517
2013	Zhenba County	79	38.601	21495	6232	38.601	21495	6232	38.601	27727	0.224763	0.224763	13	165	87623
2014	Zhenba County	79	38.464	23924	7042	38.464	23924	7042	38.464	30966	0.227411	0.227411	12	170	86865
2015	Zhenba County	79	38.876	23348	8002	38.876	23348	8002	38.876	31350	0.255247	0.255247	12	190	89515
2016	Zhenba County	79	38.857	25216	8698	38.857	25216	8698	38.857	33914	0.256472	0.256472	12	228	89981
2017	Zhenba County	79	38.9537			38.9537	27084	9394	38.9537	36478	0.257525	0.257525	12	246	91886
2018	Zhenba County	79	37.7312			37.7312	28952	10090	37.7312	39042	0.25844	0.25844	12	269	93384
2019	Zhenba County	79	37.744			37.744	30820	10786	37.744	41606	0.259241	0.259241	12	241	95217
2020	Zhenba County	79	37.8468			37.8468	32688	11482	37.8468	44170	0.25995	0.25995	12	275	97050
2021	Zhenba County	79				37.9496	34556	12178	37.9496	46734	0.260581	0.260581	12	455	98883
2012	Hantai District	80	17.774	20966		17.774	20966	6190	17.774	27156	0.227942	0.227942	13	3186	103517
2013	Hantai District	80	17.796	23450		17.796	23450	6896	17.796	30346	0.227246	0.227246	14	3667	104845
2014	Hantai District	80	17.729	26030		17.729	26030	7602	17.729	33632	0.226035	0.226035	13	4141	103886
2015	Hantai District	80	17.755	23832	8308	17.755	23832	8308	17.755	32140	0.258494	0.258494	14	4537	107582
2016	Hantai District	80	17.423	25810	9014	17.423	25810	9014	17.423	34824	0.258844	0.258844	14	5169	107944
2017	Hantai District	80	17.1759			17.1759	27788	9720	17.1759	37508	0.259145	0.259145	14	5801	110074
2018	Hantai District	80	16.5195			16.5195	29766	10426	16.5195	40192	0.259405	0.259405	14	6764	113270
2019	Hantai District	80	16.429			16.429	31744	11132	16.429	42876	0.259632	0.259632	13	6759	114009
2020	Hantai District	80	16.4806			16.4806	33722	11838	16.4806	45560	0.259833	0.259833	13	6754	114748
2021	Hantai District	80				16.5322	35700	12544	16.5322	48244	0.260012	0.260012	13	1737	115487
2012	Mian County	81	30.811	20228	6642	30.811	20228	6642	30.811	26870	0.24719	0.24719	11	443	132994
2013	Mian County	81	30.852	22610	7612	30.852	22610	7612	30.852	30222	0.251869	0.251869	12	468	134696
2014	Mian County	81	30.736	25188	8556	30.736	25188	8556	30.736	33744	0.253556	0.253556	11	440	133513
2015	Mian County	81	30.465	23630	8189	30.465	23630	8189	30.465	31819	0.257362	0.257362	12	420	131171
2016	Mian County	81	30.322	25662	8910	30.322	25662	8910	30.322	34572	0.257723	0.257723	12	537	132523
2017	Mian County	81	30.0276			30.0276	27694	9631	30.0276	37325	0.258031	0.258031	12	613	131460
2018	Mian County	81	29.8669			29.8669	29726	10352	29.8669	40078	0.258296	0.258296	12	611	136618
2019	Mian County	81	29.763			29.763	31758	11073	29.763	42831	0.258528	0.258528	11	669	136520
2020	Mian County	81	29.8406			29.8406	33790	11794	29.8406	45584	0.258731	0.258731	11	743	136422
2021	Mian County	81				29.9182	35822	12515	29.9182	48337	0.258911	0.258911	12	478	136324
2012	Nanzheng District	82		20442	7228	38.0427	20442	7228	38.0427	27670	0.261222	0.261222	11	476	147416
2013	Nanzheng District	82		22880	8305	37.0226	22880	8305	37.0226	31185	0.266314	0.266314	13	545	149315
2014	Nanzheng District	82		25465	9368	36.0026	25465	9368	36.0026	34833	0.26894	0.26894	12	584	148007
2015	Nanzheng District	82		23661	8217	34.9825	23661	8217	34.9825	31878	0.257764	0.257764	12	616	148153
2016	Nanzheng District	82		25649	8910	33.9624	25649	8910	33.9624	34559	0.25782	0.25782	13	681	148790
2017	Nanzheng District	82	32.9424			32.9424	27637	9603	32.9424	37240	0.257868	0.257868	12	772	147828
2018	Nanzheng District	82	31.9223			31.9223	29625	10296	31.9223	39921	0.257909	0.257909	12	778	156499
2019	Nanzheng District	82	31.831			31.831	31613	10989	31.831	42602	0.257946	0.257946	12	803	155634
2020	Nanzheng District	82	31.927			31.927	33601	11682	31.927	45283	0.257978	0.257978	12	853	154769
2021	Nanzheng District	82				32.0229	35589	12375	32.0229	47964	0.258006	0.258006	12	428	153904
2012	Chenggu County	83	27.133	20468	7309	27.133	20468	7309	27.133	27777	0.263131	0.263131	12	611	139827
2013	Chenggu County	83	27.167	22916	8383	27.167	22916	8383	27.167	31299	0.267836	0.267836	13	745	141604
2014	Chenggu County	83	27.061	25437	9473	27.061	25437	9473	27.061	34910	0.271355	0.271355	13	850	140327
2015	Chenggu County	83	26.587	23648	8236	26.587	23648	8236	26.587	31884	0.258311	0.258311	13	959	141017
2016	Chenggu County	83	26.457	25611	8953	26.457	25611	8953	26.457	34564	0.259027	0.259027	13	1089	141359
2017	Chenggu County	83	26.1663			26.1663	27574	9670	26.1663	37244	0.259639	0.259639	13	1150	141453
2018	Chenggu County	83	28.3513			28.3513	29537	10387	28.3513	39924	0.260169	0.260169	13	1026	155291
2019	Chenggu County	83	28.268			28.268	31500	11104	28.268	42604	0.260633	0.260633	13	1110	154772
2020	Chenggu County	83	28.3409			28.3409	33463	11821	28.3409	45284	0.261041	0.261041	13	1247	154253
2021	Chenggu County	83				28.4138	35426	12538	28.4138	47964	0.261404	0.261404	13	326	153734
2012	Yang County	84	33.215	19788	5755	33.215	19788	5755	33.215	25543	0.225306	0.225306	11	265	155658
2013	Yang County	84	33.26	22212	6618	33.26	22212	6618	33.26	28830	0.229553	0.229553	13	294	157626
2014	Yang County	84	33.131	24700	7419	33.131	24700	7419	33.131	32119	0.230985	0.230985	12	313	156204
2015	Yang County	84		23379	8164	32.9625	23379	8164	32.9625	31543	0.258821	0.258821	12	332	157065
2016	Yang County	84		25366	8882	32.794	25366	8882	32.794	34248	0.259344	0.259344	13	377	157753
2017	Yang County	84	32.6254			32.6254	27353	9600	32.6254	36953	0.259789	0.259789	12	437	157255
2018	Yang County	84	33.3506			33.3506	29340	10318	33.3506	39658	0.260174	0.260174	12	509	165333
2019	Yang County	84	33.236			33.236	31327	11036	33.236	42363	0.26051	0.26051	12	538	165044
2020	Yang County	84	33.3233			33.3233	33314	11754	33.3233	45068	0.260806	0.260806	12	602	164755
2021	Yang County	84				33.4106	35301	12472	33.4106	47773	0.261068	0.261068	12	509	164466
2012	Hanbin District	85	54.751	22115	5920	54.751	22115	5920	54.751	28035	0.211165	0.211165	13	515	217363
2013	Hanbin District	85	54.745	24835	6731	54.745	24835	6731	54.745	31566	0.213236	0.213236	15	578	218628
2014	Hanbin District	85	53.852	27890	7572	53.852	27890	7572	53.852	35462	0.213524	0.213524	14	642	214162
2015	Hanbin District	85	53.745	24332	7849	53.745	24332	7849	53.745	32181	0.243902	0.243902	14	692	214262
2016	Hanbin District	85	53.583	26389	8506	53.583	26389	8506	53.583	34895	0.24376	0.24376	15	799	215201
2017	Hanbin District	85	53.067			53.067	28446	9163	53.067	37609	0.243638	0.243638	14	940	212784
2018	Hanbin District	85	46.643			46.643	30503	9820	46.643	40323	0.243533	0.243533	14	1046	186700
2019	Hanbin District	85	46.455			46.455	32560	10477	46.455	43037	0.243442	0.243442	14	1032	189685
2020	Hanbin District	85	46.567			46.567	34617	11134	46.567	45751	0.243361	0.243361	14	99	192670
2021	Hanbin District	85				46.679	36674	11791	46.679	48465	0.243289	0.243289	14	70	195655
2012	Langao County	86	24.827	20483	5755	24.827	20483	5755	24.827	26238	0.219338	0.219338	11	158	64013
2013	Langao County	86	24.836	22982	6537	24.836	22982	6537	24.836	29519	0.221451	0.221451	12	179	65142
2014	Langao County	86	24.693	25786	7348	24.693	25786	7348	24.693	33134	0.221766	0.221766	11	205	65530
2015	Langao County	86	24.885	24020	7707	24.885	24020	7707	24.885	31727	0.242916	0.242916	12	233	67290
2016	Langao County	86	24.871	26003	8374	24.871	26003	8374	24.871	34377	0.243593	0.243593	12	269	67905
2017	Langao County	86	24.828			24.828	27986	9041	24.828	37027	0.244173	0.244173	12	303	68582
2018	Langao County	86	14.592			14.592	29969	9708	14.592	39677	0.244676	0.244676	12	296	41497
2019	Langao County	86	14.522			14.522	31952	10375	14.522	42327	0.245115	0.245115	11	249	42326
2020	Langao County	86	14.748			14.748	33935	11042	14.748	44977	0.245503	0.245503	11	281	43155
2021	Langao County	86				14.974	35918	11709	14.974	47627	0.245848	0.245848	12	242	43984
2012	Hanyin County	87	25.686	20228	5938	25.686	20228	5938	25.686	26166	0.226936	0.226936	13	429	100027
2013	Hanyin County	87	25.693	22676	6858	25.693	22676	6858	25.693	29534	0.232207	0.232207	15	501	102453
2014	Hanyin County	87	25.913	25420	7797	25.913	25420	7797	25.913	33217	0.234729	0.234729	14	568	103270
2015	Hanyin County	87	25.398	23995	8063	25.398	23995	8063	25.398	32058	0.251513	0.251513	14	631	101208
2016	Hanyin County	87	25.26	26000	8745	25.26	26000	8745	25.26	34745	0.251691	0.251691	14	697	101646
2017	Hanyin County	87	24.923			24.923	28005	9427	24.923	37432	0.251843	0.251843	14	789	100412
2018	Hanyin County	87	23.297			23.297	30010	10109	23.297	40119	0.251975	0.251975	14	824	96263
2019	Hanyin County	87	23.192			23.192	32015	10791	23.192	42806	0.252091	0.252091	14	734	98247
2020	Hanyin County	87	23.371			23.371	34020	11473	23.371	45493	0.252193	0.252193	14	813	100231
2021	Hanyin County	87				23.55	36025	12155	23.55	48180	0.252283	0.252283	14	274	102215
2012	Shiquan County	88	19.264	20525	5948	19.264	20525	5948	19.264	26473	0.224682	0.224682	13	315	66459
2013	Shiquan County	88	19.263	22988	6786	19.263	22988	6786	19.263	29774	0.227917	0.227917	14	361	67048
2014	Shiquan County	88	19.138	25747	7675	19.138	25747	7675	19.138	33422	0.229639	0.229639	13	415	66859
2015	Shiquan County	88	19.353	23905	8011	19.353	23905	8011	19.353	31916	0.251003	0.251003	13	471	69911
2016	Shiquan County	88	19.358	25854	8753	19.358	25854	8753	19.358	34607	0.252926	0.252926	14	528	70668
2017	Shiquan County	88	19.338			19.338	27803	9495	19.338	37298	0.254571	0.254571	14	635	71180
2018	Shiquan County	88	15.774			15.774	29752	10237	15.774	39989	0.255995	0.255995	14	621	61196
2019	Shiquan County	88	15.723			15.723	31701	10979	15.723	42680	0.25724	0.25724	13	548	62565
2020	Shiquan County	88	15.915			15.915	33650	11721	15.915	45371	0.258337	0.258337	13	619	63934
2021	Shiquan County	88				16.107	35599	12463	16.107	48062	0.259311	0.259311	13	51	65303
2012	Ningshan County	89	4.785	19733	5629	4.785	19733	5629	4.785	25362	0.221946	0.221946	9	58	19848
2013	Ningshan County	89	4.801	21785	6445	4.801	21785	6445	4.801	28230	0.228303	0.228303	11	60	19935
2014	Ningshan County	89	4.946	24116	7315	4.946	24116	7315	4.946	31431	0.232732	0.232732	10	67	19212
2015	Ningshan County	89	5.106	23338	7625	5.106	23338	7625	5.106	30963	0.246262	0.246262	10	72	19423
2016	Ningshan County	89	5.089	25358	8270	5.089	25358	8270	5.089	33628	0.245926	0.245926	10	82	19611
2017	Ningshan County	89	5.151			5.151	27378	8915	5.151	36293	0.24564	0.24564	10	94	19667
2018	Ningshan County	89	2.972			2.972	29398	9560	2.972	38958	0.245392	0.245392	10	86	12127
2019	Ningshan County	89	2.965			2.965	31418	10205	2.965	41623	0.245177	0.245177	10	63	12394
2020	Ningshan County	89	3.007			3.007	33438	10850	3.007	44288	0.244987	0.244987	10	66	12661
2021	Ningshan County	89				3.049	35458	11495	3.049	46953	0.244819	0.244819	10	127	12928
2012	Ziyang County	90	42.147	20196	5966	42.147	20196	5966	42.147	26162	0.228041	0.228041	12	247	106868
2013	Ziyang County	90	42.152	22337	6849	42.152	22337	6849	42.152	29186	0.234667	0.234667	13	289	108375
2014	Ziyang County	90	42.022	24749	7794	42.022	24749	7794	42.022	32543	0.239499	0.239499	13	333	109089
2015	Ziyang County	90	42.459	23575	8051	42.459	23575	8051	42.459	31626	0.254569	0.254569	13	359	111311
2016	Ziyang County	90	42.083	25474	8789	42.083	25474	8789	42.083	34263	0.256516	0.256516	13	405	111499
2017	Ziyang County	90	41.935			41.935	27373	9527	41.935	36900	0.258184	0.258184	13	463	112260
2018	Ziyang County	90	38.746			38.746	29272	10265	38.746	39537	0.25963	0.25963	13	489	102996
2019	Ziyang County	90	38.621			38.621	31171	11003	38.621	42174	0.260895	0.260895	13	449	105073
2020	Ziyang County	90	38.2			38.2	33070	11741	38.2	44811	0.262012	0.262012	13	481	107150
2021	Ziyang County	90				37.779	34969	12479	37.779	47448	0.263004	0.263004	13	376	109227
2012	Xunyang City	91	45.323	20617	5911	45.323	20617	5911	45.323	26528	0.222821	0.222821	13	281	120091
2013	Xunyang City	91	45.293	22741	6757	45.293	22741	6757	45.293	29498	0.229066	0.229066	14	317	122649
2014	Xunyang City	91	45.169	25174	7655	45.169	25174	7655	45.169	32829	0.233178	0.233178	13	350	123708
2015	Xunyang City	91	45.582	23907	7900	45.582	23907	7900	45.582	31807	0.248373	0.248373	14	389	125482
2016	Xunyang City	91	45.524	25810	8608	45.524	25810	8608	45.524	34418	0.250102	0.250102	14	451	126092
2017	Xunyang City	91	45.365			45.365	27713	9316	45.365	37029	0.251587	0.251587	14	531	126397
2018	Xunyang City	91	40.371			40.371	29616	10024	40.371	39640	0.252876	0.252876	14	528	115459
2019	Xunyang City	91	40.221			40.221	31519	10732	40.221	42251	0.254006	0.254006	14	490	117778
2020	Xunyang City	91	40.23			40.23	33422	11440	40.23	44862	0.255004	0.255004	13	567	120097
2021	Xunyang City	91				40.239	35325	12148	40.239	47473	0.255893	0.255893	14	114	122416
2012	Pingli County	92	24.885	20007	6247	24.885	20007	6247	24.885	26254	0.237945	0.237945	11	191	73628
2013	Pingli County	92	24.889	22408	7165	24.889	22408	7165	24.889	29573	0.242282	0.242282	13	229	74041
2014	Pingli County	92	24.771	25097	8147	24.771	25097	8147	24.771	33244	0.245067	0.245067	12	257	74132
2015	Pingli County	92	24.858	23810	8130	24.858	23810	8130	24.858	31940	0.25454	0.25454	12	292	76898
2016	Pingli County	92	24.816	25728	8859	24.816	25728	8859	24.816	34587	0.256137	0.256137	13	331	77631
2017	Pingli County	92	24.765			24.765	27646	9588	24.765	37234	0.257507	0.257507	12	376	78199
2018	Pingli County	92	17.276			17.276	29564	10317	17.276	39881	0.258695	0.258695	12	392	56507
2019	Pingli County	92	17.177			17.177	31482	11046	17.177	42528	0.259735	0.259735	12	336	57606
2020	Pingli County	92	17.553			17.553	33400	11775	17.553	45175	0.260653	0.260653	12	393	58705
2021	Pingli County	92				17.929	35318	12504	17.929	47822	0.26147	0.26147	12	45	59804
2012	Zhenping County	93	9.302	20207	5673	9.302	20207	5673	9.302	25880	0.219204	0.219204	10	87	27180
2013	Zhenping County	93	9.341	22410	6456	9.341	22410	6456	9.341	28866	0.223654	0.223654	11	80	27363
2014	Zhenping County	93	9.351	24853	7360	9.351	24853	7360	9.351	32213	0.228479	0.228479	10	90	27056
2015	Zhenping County	93	9.416	23620	7728	9.416	23620	7728	9.416	31348	0.246523	0.246523	11	102	27534
2016	Zhenping County	93	9.419	25546	8413	9.419	25546	8413	9.419	33959	0.24774	0.24774	11	128	27871
2017	Zhenping County	93	9.416			9.416	27472	9098	9.416	36570	0.248783	0.248783	11	153	27949
2018	Zhenping County	93	7.056			7.056	29398	9783	7.056	39181	0.249687	0.249687	10	162	21076
2019	Zhenping County	93	7.017			7.017	31324	10468	7.017	41792	0.250479	0.250479	10	158	21524
2020	Zhenping County	93	7.112			7.112	33250	11153	7.112	44403	0.251177	0.251177	10	174	21972
2021	Zhenping County	93				7.207	35176	11838	7.207	47014	0.251797	0.251797	11	226	22420
2012	Baihe County	94	18.905	19980	5798	18.905	19980	5798	18.905	25778	0.22492	0.22492	13	286	56326
2013	Baihe County	94	18.9	22178	6592	18.9	22178	6592	18.9	28770	0.229128	0.229128	14	332	56706
2014	Baihe County	94	18.846	24617	7416	18.846	24617	7416	18.846	32033	0.231511	0.231511	13	361	57364
2015	Baihe County	94	18.729	23432	7768	18.729	23432	7768	18.729	31200	0.248974	0.248974	14	410	58180
2016	Baihe County	94	18.706	25485	8417	18.706	25485	8417	18.706	33902	0.248274	0.248274	14	465	58376
2017	Baihe County	94	18.683			18.683	27538	9066	18.683	36604	0.247678	0.247678	14	545	58900
2018	Baihe County	94	17.397			17.397	29591	9715	17.397	39306	0.247163	0.247163	14	550	56726
2019	Baihe County	94	17.329			17.329	31644	10364	17.329	42008	0.246715	0.246715	14	489	57249
2020	Baihe County	94	17.513			17.513	33697	11013	17.513	44710	0.246321	0.246321	14	545	57772
2021	Baihe County	94				17.697	35750	11662	17.697	47412	0.245971	0.245971	14	679	58295
2012	Shangzhou District	95	35.4735	21100	5414	35.4735	21100	5414	35.4735	26514	0.204194	0.204194	10	406	107590
2013	Shangzhou District	95	32.9402	23558	6204	32.9402	23558	6204	32.9402	29762	0.208454	0.208454	12	440	108103
2014	Shangzhou District	95	29.8535	26196	7066	29.8535	26196	7066	29.8535	33262	0.212435	0.212435	11	460	81183
2015	Shangzhou District	95	26.7335	24010	7614	26.7335	24010	7614	26.7335	31624	0.240767	0.240767	11	509	104620
2016	Shangzhou District	95	29.089	26016	8230	29.089	26016	8230	29.089	34246	0.24032	0.24032	12	575	105291
2017	Shangzhou District	95	28.758			28.758	28022	8846	28.758	36868	0.239937	0.239937	11	575	97768
2018	Shangzhou District	95	24.458			24.458	30028	9462	24.458	39490	0.239605	0.239605	11	587	90416
2019	Shangzhou District	95	27.287			27.287	32034	10078	27.287	42112	0.239314	0.239314	11	530	91387
2020	Shangzhou District	95				30.116	34040	10694	30.116	44734	0.239058	0.239058	11	567	92358
2021	Shangzhou District	95				32.945	36046	11310	32.945	47356	0.238829	0.238829	11	265	93329
2012	Luonan County	96	42.9202	20407	5592	42.9202	20407	5592	42.9202	25999	0.215085	0.215085	10	293	163415
2013	Luonan County	96	39.6602	22754	6414	39.6602	22754	6414	39.6602	29168	0.219899	0.219899	12	325	168079
2014	Luonan County	96	36.9335	25302	7301	36.9335	25302	7301	36.9335	32603	0.223936	0.223936	11	350	142081
2015	Luonan County	96	34.7802	23476	7705	34.7802	23476	7705	34.7802	31181	0.247106	0.247106	11	401	162334
2016	Luonan County	96	48.698	25421	8375	48.698	25421	8375	48.698	33796	0.24781	0.24781	11	483	164437
2017	Luonan County	96	48.047			48.047	27366	9045	48.047	36411	0.248414	0.248414	11	497	159840
2018	Luonan County	96	34.847			34.847	29311	9715	34.847	39026	0.248937	0.248937	11	525	123812
2019	Luonan County	96	34.708			34.708	31256	10385	34.708	41641	0.249394	0.249394	11	419	120869
2020	Luonan County	96				34.569	33201	11055	34.569	44256	0.249797	0.249797	11	487	117926
2021	Luonan County	96				34.43	35146	11725	34.43	46871	0.250155	0.250155	11	233	114983
2012	Shanyang County	97	32.7535	19750	5606	32.7535	19750	5606	32.7535	25356	0.221092	0.221092	11	229	110726
2013	Shanyang County	97	30.7402	21922	6474	30.7402	21922	6474	30.7402	28396	0.22799	0.22799	13	270	111477
2014	Shanyang County	97	28.8268	24443	7380	28.8268	24443	7380	28.8268	31823	0.231908	0.231908	12	294	86812
2015	Shanyang County	97	27.5668	23245	7850	27.5668	23245	7850	27.5668	31095	0.252452	0.252452	12	343	101365
2016	Shanyang County	97	36.738	25135	8501	36.738	25135	8501	36.738	33636	0.252735	0.252735	13	408	102559
2017	Shanyang County	97	35.962			35.962	27025	9152	35.962	36177	0.252978	0.252978	12	419	107437
2018	Shanyang County	97	27.461			27.461	28915	9803	27.461	38718	0.25319	0.25319	12	432	85740
2019	Shanyang County	97	27.837			27.837	30805	10454	27.837	41259	0.253375	0.253375	12	408	85264
2020	Shanyang County	97				28.213	32695	11105	28.213	43800	0.253539	0.253539	12	486	84788
2021	Shanyang County	97				28.589	34585	11756	28.589	46341	0.253685	0.253685	12	149	84312
2012	Danfeng County	98	21.1268	20527	5536	21.1268	20527	5536	21.1268	26063	0.212408	0.212408	11	255	65152
2013	Danfeng County	98	20.0201	22905	6333	20.0201	22905	6333	20.0201	29238	0.216602	0.216602	13	300	65304
2014	Danfeng County	98	19.0601	25447	7149	19.0601	25447	7149	19.0601	32596	0.219321	0.219321	12	324	51142
2015	Danfeng County	98	18.5801	23571	7701	18.5801	23571	7701	18.5801	31272	0.246259	0.246259	12	355	60140
2016	Danfeng County	98	21.396	25569	8340	21.396	25569	8340	21.396	33909	0.245952	0.245952	12	399	61124
2017	Danfeng County	98	21.074			21.074	27567	8979	21.074	36546	0.24569	0.24569	12	406	60907
2018	Danfeng County	98	19.095			19.095	29565	9618	19.095	39183	0.245464	0.245464	12	402	54374
2019	Danfeng County	98	18.348			18.348	31563	10257	18.348	41820	0.245265	0.245265	12	365	52979
2020	Danfeng County	98				17.601	33561	10896	17.601	44457	0.245091	0.245091	12	408	51584
2021	Danfeng County	98				16.854	35559	11535	16.854	47094	0.244936	0.244936	12	194	50189
2012	Shangnan County	99	12.6134	20058	5529	12.6134	20058	5529	12.6134	25587	0.216086	0.216086	12	234	61733
2013	Shangnan County	99	11.6667	22307	6400	11.6667	22307	6400	11.6667	28707	0.222942	0.222942	14	275	62560
2014	Shangnan County	99	10.9601	24783	7219	10.9601	24783	7219	10.9601	32002	0.22558	0.22558	13	299	49332
2015	Shangnan County	99	10.5601	23250	7739	10.5601	23250	7739	10.5601	30989	0.249734	0.249734	13	331	56538
2016	Shangnan County	99	20.346	25215	8420	20.346	25215	8420	20.346	33635	0.250334	0.250334	14	379	57209
2017	Shangnan County	99	20.716			20.716	27180	9101	20.716	36281	0.250848	0.250848	14	381	58938
2018	Shangnan County	99	10.342			10.342	29145	9782	10.342	38927	0.251291	0.251291	13	396	29095
2019	Shangnan County	99	10.864			10.864	31110	10463	10.864	41573	0.251678	0.251678	14	353	30882
2020	Shangnan County	99				11.386	33075	11144	11.386	44219	0.252018	0.252018	13	408	32669
2021	Shangnan County	99				11.908	35040	11825	11.908	46865	0.25232	0.25232	13	249	34456
2012	Zhen’an County	100	32.631	20201	5585	32.631	20201	5585	32.631	25786	0.21659	0.21659	11	190	92502
2013	Zhen’an County	100	32.391	22475	6394	32.391	22475	6394	32.391	28869	0.221483	0.221483	13	222	92941
2014	Zhen’an County	100	32.467	25037	7276	32.467	25037	7276	32.467	32313	0.225173	0.225173	12	241	75641
2015	Zhen’an County	100	33.692	23292	7750	33.692	23292	7750	33.692	31042	0.249662	0.249662	12	257	86613
2016	Zhen’an County	100	33.625	25289	8370	33.625	25289	8370	33.625	33659	0.24867	0.24867	12	304	87690
2017	Zhen’an County	100	34.148			34.148	27286	8990	34.148	36276	0.247822	0.247822	12	319	89283
2018	Zhen’an County	100	29.154			29.154	29283	9610	29.154	38893	0.247088	0.247088	12	304	73279
2019	Zhen’an County	100	28.055			28.055	31280	10230	28.055	41510	0.246447	0.246447	12	253	70928
2020	Zhen’an County	100				26.956	33277	10850	26.956	44127	0.245881	0.245881	12	287	68577
2021	Zhen’an County	100				25.857	35274	11470	25.857	46744	0.245379	0.245379	12	146	66226
2012	Zhashui County	101	12.4534	20128	5446	12.4534	20128	5446	12.4534	25574	0.212951	0.212951	10	268	41842
2013	Zhashui County	101	12.1801	22362	6306	12.1801	22362	6306	12.1801	28668	0.219967	0.219967	12	282	42253
2014	Zhashui County	101	12.0667	24822	7168	12.0667	24822	7168	12.0667	31990	0.22407	0.22407	11	284	35792
2015	Zhashui County	101	12.1001	23236	7622	12.1001	23236	7622	12.1001	30858	0.247002	0.247002	11	321	40946
2016	Zhashui County	101	13.135	25141	8277	13.135	25141	8277	13.135	33418	0.247681	0.247681	11	322	41450
2017	Zhashui County	101	13.033			13.033	27046	8932	13.033	35978	0.248263	0.248263	11	320	42561
2018	Zhashui County	101	14.085			14.085	28951	9587	14.085	38538	0.248767	0.248767	11	359	43843
2019	Zhashui County	101	12.49			12.49	30856	10242	12.49	41098	0.249209	0.249209	11	328	39228
2020	Zhashui County	101				10.895	32761	10897	10.895	43658	0.249599	0.249599	11	417	34613
2021	Zhashui County	101				9.3	34666	11552	9.3	46218	0.249946	0.249946	11	417	29998
