# Supplementary material
Source: Research Square preprint supplement (doi:10.21203/rs.3.rs-8699542/v1)
Supplement: Supplementary file 4 [file cbaa5b5fc5993e3e17fb5e78.xlsx]

## Sheet: Total
Year	id	Y	Y2	Total population at the end of the year(10,000 people)	Average annual temperature（℃）	Average annual precipitation	Local budget expenditures(10,000 yuan)	Population productivity (million yuan/person)	Effective irrigated area(ha)	Regional economic density(million yuan/square kilometer)	Protection Rate of Permanent Basic Farmland	Cultivated land area per capital (ha/million people)	Fertilizer Application Intensity	Proportion of Gross Output Value of Farming, Forestry, Animal Husbandry and Fishery	Total Mechanical Power per Unit Cultivated Land	Proportion of Per Capita Disposable Income of Rural Residents	Total Grain Output	Sown Area of Grain Crops	xian	County/District
2012	1	0.214798	0.018524	52.4	13.0109	0.00192617	169283	4.4523	26267	7189.52	0.00697717	200.592	0.40922	0.105252	0.00171249	0.316399	61082	13.8067	Baqiao District	Xi’an City
2013	1	0.320235	0.053844	53.21	14.6867	0.00159294	190742	5.56451	24548.8	8290.6	0.00745295	184.928	0.371545	0.103893	0.00182215	0.322405	56370	13.2134	Baqiao District	Xi’an City
2014	1	0.350186	0.097943	53.6	13.8822	0.00214772	220305	5.47215	24385.5	9038.52	0.00793605	172.407	0.394736	0.102533	0.00171735	0.325769	52853	12.0734	Baqiao District	Xi’an City
2015	1	0.406207	0.118376	53.89	13.9703	0.00190118	295407	6.16589	24675.2	10239.8	0.00842083	161.607	0.385623	0.0926749	0.00183718	0.355582	54071	11.5801	Baqiao District	Xi’an City
2016	1	0.441865	0.103446	54.68	14.4933	0.0016231	272233	6.319	2454.65	10162.7	0.0139903	95.8669	0.361424	0.0991755	0.00276803	0.357092	52567	10.6867	Baqiao District	Xi’an City
2017	1	0.558448	0.132275	64.06	14.1027	0.00199597	293695	6.6867	14740.5	13200.3	0.0151523	75.5542	0.15075	0.0851446	0.00289256	0.3584	49645	10.339	Baqiao District	Xi’an City
2018	1	0.44855	0.110339	67.73	13.8741	0.00177212	330784	7.98479	27026.4	14816	0.0165248	65.5249	0.257327	0.0647444	0.00292925	0.359545	27673	5.42669	Baqiao District	Xi’an City
2019	1	0.497795	0.12743	70.39	13.8814	0.00219054	355428	6.94979	39312.3	15075.2	0.0197408	52.7774	0.0952844	0.0668998	0.00323015	0.360555	24684	4.71336	Baqiao District	Xi’an City
2020	1	0.533937	0.136869	102.1	13.4952	0.00222255	371532	5.39187	4265.59	16704.5	0.024511	29.3046	0.125789	0.0631908	0.00392714	0.361453	21695	4.52002	Baqiao District	Xi’an City
2021	1	0.580216	0.15096	133.81	13.7356	0.00301402	387636	3.83396	41293.3	18701.1	0.0323213	16.9569	0.166043	0.0589597	0.00519171	0.362256	18706	4.32669	Baqiao District	Xi’an City
2012	2	0.232076	0.051046	25.68	14.8082	0.00125451	139962	5.59735	6243.74	5785.73	0.357161	614.953	0.237032	0.205287	0.00107649	0.301672	81318	12.9601	Yanliang District	Xi’an City
2013	2	0.321503	0.061154	26.01	16.6441	0.00103206	166351	6.49596	5542.88	6909.02	0.359345	603.46	0.254144	0.192006	0.0012105	0.306774	85369	14.2467	Yanliang District	Xi’an City
2014	2	0.39127	0.099988	26.26	15.7115	0.00149549	186987	7.4158	5367.94	7962.38	0.360816	595.278	0.296767	0.181969	0.00121546	0.311998	81003	14.1667	Yanliang District	Xi’an City
2015	2	0.476715	0.130272	26.27	15.8646	0.00110815	220632	7.33723	5187.23	7845.02	0.364406	589.189	0.283978	0.192262	0.00122755	0.35411	88211	14.2734	Yanliang District	Xi’an City
2016	2	0.459107	0.101983	26.49	16.4675	0.000982144	230682	7.32125	324.263	7930.48	0.364901	583.503	0.296878	0.196771	0.00109983	0.354274	86790	13.9667	Yanliang District	Xi’an City
2017	2	0.501461	0.090913	29.47	15.9139	0.00160038	239536	8.15112	1773.84	9822.53	0.369008	518.663	0.329156	0.171781	0.00104678	0.354417	84826	14.019	Yanliang District	Xi’an City
2018	2	0.591791	0.088386	30.12	15.9325	0.0010479	217355	8.33453	3223.42	10226.9	0.37264	502.523	0.234793	0.178453	0.000858879	0.354542	120276	18.5134	Yanliang District	Xi’an City
2019	2	0.625874	0.096645	30.45	15.7446	0.00142616	224871	8.37635	4673	10429.8	0.371609	498.456	0.261294	0.191141	0.000724733	0.354653	114974	17.9001	Yanliang District	Xi’an City
2020	2	0.605235	0.081562	30.3	15.3432	0.00156114	209809	8.22112	3851.86	10186.1	0.370584	502.31	0.288123	0.212259	0.000591327	0.354752	109672	18.0001	Yanliang District	Xi’an City
2021	2	0.6381	0.092822	30.15	15.6253	0.00213098	194747	8.06589	2993.32	10829.7	0.369564	506.202	0.317677	0.215206	0.000458655	0.35484	104370	18.1001	Yanliang District	Xi’an City
2012	3	0.285268	0.047756	70.59	13.943	0.00148706	242058	2.99668	335.272	2309.36	0.327434	665.732	0.111185	0.221326	0.0011781	0.303095	351676	74.8404	Lintong District	Xi’an City
2013	3	0.322041	0.052175	71.39	15.7913	0.00125505	272237	3.17383	244.472	2473.66	0.328279	656.577	0.120119	0.227731	0.00121353	0.30802	326809	70.807	Lintong District	Xi’an City
2014	3	0.426894	0.084558	71.85	14.9153	0.00174768	293966	3.22129	252.133	2526.83	0.33097	647.07	0.124708	0.232543	0.00130962	0.313256	317870	68.987	Lintong District	Xi’an City
2015	3	0.476548	0.102886	71.11	14.9601	0.00140404	392195	2.74824	258.498	2099.85	0.33273	650.345	0.121146	0.286761	0.00132545	0.346273	328636	66.8337	Lintong District	Xi’an City
2016	3	0.313258	0.073407	71.55	15.5131	0.00123372	384236	2.55919	265.274	1999.08	0.335048	641.873	0.126064	0.310956	0.00101619	0.347652	316894	65.467	Lintong District	Xi’an City
2017	3	0.311956	0.053564	68.99	15.0499	0.00181409	406723	3.23578	358.821	2412.85	0.335516	664.763	0.131271	0.266145	0.000890186	0.348847	304775	63.695	Lintong District	Xi’an City
2018	3	0.397851	0.074433	69.69	15.0177	0.00133687	436318	3.48236	452.369	2593.1	0.336007	657.124	0.123598	0.253287	0.00088221	0.349894	329083	66.867	Lintong District	Xi’an City
2019	3	0.497249	0.094459	70.04	14.8678	0.00175636	458230	3.4652	545.917	2649.54	0.34855	630.311	0.117923	0.274475	0.000956407	0.350818	332607	66.7403	Lintong District	Xi’an City
2020	3	0.554005	0.100687	67.6	14.4439	0.00170752	465366	3.73566	558.726	2756.97	0.362066	628.683	0.138883	0.289328	0.00099583	0.35164	336131	66.807	Lintong District	Xi’an City
2021	3	0.597727	0.106916	65.16	14.6789	0.00250787	472502	4.00612	572.543	2864.4	0.376672	626.934	0.159409	0.303067	0.00103843	0.352376	339655	66.8737	Lintong District	Xi’an City
2012	4	0.309897	0.078752	102	11.0347	0.00300174	365362	3.55529	872.269	2295.19	0.104334	433.52	0.0825782	8.54842e-06	0.000949818	0.295399	368814	77.5588	Chang’an District	Xi’an City
2013	4	0.370215	0.090918	104	12.599	0.00275767	447600	3.54949	78.7346	2324.6	0.105867	419.029	0.0842158	8.39776e-06	0.00100966	0.301151	357700	73.7769	Chang’an District	Xi’an City
2014	4	0.434866	0.104311	106	11.7326	0.00301236	497307	3.96883	68.1847	2649.22	0.109899	396.038	0.0884161	9.50806e-06	0.0010243	0.304961	338400	69.995	Chang’an District	Xi’an City
2015	4	0.440786	0.111037	106.53	11.9838	0.00300526	534331	4.81265	496.149	3228.53	0.111363	388.886	0.07898	8.09454e-06	0.00103795	0.324722	345885	6.72336	Chang’an District	Xi’an City
2016	4	0.50028	0.115824	108.3	12.2473	0.00274974	612604	5.61422	246.934	3828.84	0.117229	363.389	0.0658454	7.07214e-06	0.00111803	0.325903	332415	65.5461	Chang’an District	Xi’an City
2017	4	0.433415	0.112374	100.97	12.0376	0.00298489	530795	7.83437	209.067	4981.3	0.143212	319.055	0.0663575	4.93028e-06	0.00108645	0.326927	265260	53.2133	Chang’an District	Xi’an City
2018	4	0.336587	0.074941	104.28	11.6014	0.00301288	569454	8.71798	171.201	5724.87	0.147733	299.473	0.102572	2.63994e-06	0.00112075	0.327822	156242	30.9421	Chang’an District	Xi’an City
2019	4	0.416562	0.095526	106.42	11.8426	0.00325898	504679	9.49	133.334	6304.85	0.14762	293.676	0.0988585	2.69674e-06	0.00115189	0.328611	157518	26.3732	Chang’an District	Xi’an City
2020	4	0.555117	0.133776	158.6	11.4573	0.00334963	493600	7.16425	117.152	7155.23	0.147507	197.207	0.0952051	1.73377e-05	0.00118298	0.329313	158794	27.4649	Chang’an District	Xi’an City
2021	4	0.664361	0.167606	210.78	11.8708	0.00453012	482521	4.8385	1.26135	7988.99	0.147394	148.501	0.0916099	2.89102e-05	0.00121402	0.329941	160070	28.1541	Chang’an District	Xi’an City
2012	5	0.166477	0.026165	65	10.5008	0.0025264	169720	1.47277	164493	486.186	0.142746	621.538	0.125449	0.419423	0.000717822	0.281631	289759	65.707	Lantian County	Xi’an City
2013	5	0.193249	0.028902	65	12.1283	0.00203328	234900	1.64446	144221	542.864	0.144611	613.523	0.136398	0.407962	0.000752276	0.286916	264600	64.0937	Lantian County	Xi’an City
2014	5	0.127066	0.03075	66	11.3581	0.00265021	251369	1.7947	123948	590.479	0.145143	602.015	0.187618	0.390393	0.000780208	0.293069	250600	63.8337	Lantian County	Xi’an City
2015	5	0.165248	0.041634	65	11.4636	0.00257095	301002	1.73969	103675	563.709	0.145337	610.462	0.177435	0.411745	0.00078125	0.31141	260422	63.2403	Lantian County	Xi’an City
2016	5	0.268741	0.07357	65.53	11.7601	0.00221773	356183	1.86846	83402.4	610.369	0.384643	228.796	0.180803	0.402253	0.00226772	0.314611	255720	62.887	Lantian County	Xi’an City
2017	5	0.242394	0.047699	53.26	11.5847	0.00267765	357590	2.69414	63129.6	715.304	0.146936	736.913	0.184239	0.375653	0.000636975	0.317376	253850	62.208	Lantian County	Xi’an City
2018	5	0.277026	0.048319	53.68	11.2888	0.00244346	387317	2.94212	42856.9	786.79	0.147398	728.856	0.274354	0.313044	0.000638978	0.319787	170353	40.3002	Lantian County	Xi’an City
2019	5	0.320958	0.070872	53.61	11.4123	0.00272959	427514	2.78362	22584.1	743.937	0.147882	727.42	0.268544	0.346505	0.000641075	0.32191	171041	40.2135	Lantian County	Xi’an City
2020	5	0.359312	0.073299	49.2	11.165	0.00280175	444300	2.95692	2311.38	712.68	0.148369	790.02	0.265931	0.377799	0.000643186	0.323792	171729	40.1269	Lantian County	Xi’an City
2021	5	0.411712	0.084351	44.79	11.4453	0.00388835	634387	3.13021	2359.75	756.25	0.148859	864.948	0.263338	0.371202	0.000645311	0.325472	172417	40.0402	Lantian County	Xi’an City
2012	6	0.186673	0.035694	67	9.7847	0.00346537	252265	1.16836	10279.6	265.446	0.131508	496.373	0.193146	0.527363	0.00126289	0.278586	243158	52.0536	Zhouzhi County	Xi’an City
2013	6	0.257043	0.051703	68	11.3538	0.00333917	248600	1.28912	9015.75	297.253	0.131484	489.162	0.20368	0.524861	0.00129273	0.28509	230700	52.6803	Zhouzhi County	Xi’an City
2014	6	0.413785	0.099069	69	10.4675	0.00342017	284284	1.48696	7751.87	327.383	0.13146	482.159	0.150052	0.496376	0.00135261	0.289513	224955	51.3403	Zhouzhi County	Xi’an City
2015	6	0.395752	0.091811	68	10.8985	0.00310335	341695	1.53294	6487.99	350.488	0.132705	484.662	0.208106	0.489049	0.00145644	0.307803	231714	49.8469	Zhouzhi County	Xi’an City
2016	6	0.497183	0.119148	68.94	11.003	0.00290529	380428	1.66797	5224.11	387.302	0.110799	572.57	0.237103	0.49798	0.00121602	0.312152	222595	48.6602	Zhouzhi County	Xi’an City
2017	6	0.452151	0.072771	58.94	10.8232	0.00330402	398852	2.278	3960.23	452.206	0.133178	557.177	0.255388	0.44053	0.00100487	0.315902	206556	45.097	Zhouzhi County	Xi’an City
2018	6	0.415334	0.048848	59.41	10.279	0.00355655	458309	2.46243	2696.35	492.657	0.133654	550.8	0.443125	0.403087	0.00106958	0.31917	119095	25.5468	Zhouzhi County	Xi’an City
2019	6	0.462874	0.051541	59.29	10.5203	0.00370936	424000	2.31326	1432.47	465.673	0.134055	550.261	0.436035	0.471329	0.00104215	0.322043	120206	25.5001	Zhouzhi County	Xi’an City
2020	6	0.559059	0.063485	55.7	10.1866	0.00366098	428194	2.53411	168.595	473.448	0.134459	583.968	0.432025	0.504346	0.00101454	0.324588	121317	25.3268	Zhouzhi County	Xi’an City
2021	6	0.620769	0.068797	52.11	10.7394	0.0044697	435722	2.75496	1765.47	497.046	0.134865	622.318	0.428088	0.519224	0.000986771	0.326859	122428	25.1535	Zhouzhi County	Xi’an City
2012	7	0.0762952	0.014519	31	14.8911	0.00128075	162754	7.36	12549.9	7760.54	0.233109	491.742	0.532021	0.1468	0.00170559	0.31267	200246	31115.7	Gaoling District	Xi’an City
2013	7	0.188469	0.041704	32	16.8518	0.00105553	184100	8.74813	12748.2	9521.77	0.23383	474.906	0.384834	0.142707	0.00177667	0.318533	198200	29999	Gaoling District	Xi’an City
2014	7	0.356537	0.077718	33	15.9151	0.00150445	202716	9.93636	12946.5	10207.1	0.234927	458.364	0.241698	0.156	0.00185112	0.322661	190374	28882.3	Gaoling District	Xi’an City
2015	7	0.52412	0.133557	33	15.9507	0.00120492	255373	8.83333	13144.8	9911.56	0.235706	456.848	0.0817195	0.170025	0.00192359	0.356479	192757	27765.6	Gaoling District	Xi’an City
2016	7	0.521244	0.118695	33.22	16.5735	0.00106617	232310	9.37929	13343	10212.2	0.0948438	1127.84	0.0745824	0.185161	0.000667254	0.358013	187779	26648.9	Gaoling District	Xi’an City
2017	7	0.583885	0.104729	35.7	16.0439	0.00165236	253141	1.56325	13541.3	12826.5	0.243308	409.104	0.0774746	0.161121	0.00143786	0.359342	179220	25532.2	Gaoling District	Xi’an City
2018	7	0.570001	0.134907	36.26	16.0645	0.00114133	340275	1.43713	13739.6	12872.4	0.239989	408.356	0.107617	0.127601	0.00148578	0.360505	123558	24415.5	Gaoling District	Xi’an City
2019	7	0.633406	0.144152	36.71	15.8387	0.00157977	356266	1.19995	13937.9	12736.1	0.240622	402.288	0.104144	0.141259	0.00155742	0.361531	122926	23298.8	Gaoling District	Xi’an City
2020	7	0.7518	0.171784	44.2	15.2236	0.00154637	280141	8.47262	14136.2	12737.8	0.241259	333.235	0.100635	0.15353	0.00162944	0.362443	122294	22182.2	Gaoling District	Xi’an City
2021	7	0.824991	0.188855	51.69	15.4665	0.002271	204016	15.7453	14485.9	13085.7	0.2419	284.194	0.0970887	0.16141	0.00170184	0.363258	121662	21065.5	Gaoling District	Xi’an City
2012	8	0.180652	0.023199	60	11.1247	0.00324075	213234	2.36883	27915.4	1108.66	0.203015	636	0.13956	0.286434	0.00112683	0.300056	313700	20.9289	Huyi District	Xi’an City
2013	8	0.241046	0.040499	61	12.6897	0.00321217	236100	2.54492	2643.59	1210.92	0.203854	623	0.136506	0.288037	0.00121043	0.305157	303400	11.3607	Huyi District	Xi’an City
2014	8	0.375202	0.09604	61	11.7542	0.00326156	269178	2.65582	276.423	1263.34	0.206395	615.328	0.131929	0.29741	0.00133209	0.311334	296007	10.7925	Huyi District	Xi’an City
2015	8	0.44566	0.132011	61	12.0849	0.0031336	338906	2.47279	27544.9	1179.36	0.206472	615.098	0.120311	0.328928	0.00133259	0.343327	304943	7.77564	Huyi District	Xi’an City
2016	8	0.459458	0.12799	61.22	12.3288	0.0029919	402850	2.65959	287.987	1273.03	0.235609	537.096	0.115268	0.316609	0.000638667	0.343551	297776	17.3438	Huyi District	Xi’an City
2017	8	0.502886	0.130553	54.93	12.1016	0.00326143	407011	3.59385	18702.4	1382.42	0.219812	641.617	0.11881	0.251459	0.00139031	0.343745	269000	26.912	Huyi District	Xi’an City
2018	8	0.438921	0.110716	55.86	11.563	0.00344784	430239	3.88937	37116.9	1740.87	0.229985	603.025	0.165962	0.206063	0.00148434	0.343916	191315	36.4802	Huyi District	Xi’an City
2019	8	0.520301	0.126023	56.46	11.8835	0.00350026	358400	3.19217	55531.3	1444.15	0.230245	595.944	0.156871	0.268967	0.00148602	0.344068	195893	37.2069	Huyi District	Xi’an City
2020	8	0.723008	0.160544	57.7	11.5035	0.00360737	387000	4.48717	54712.6	1871.88	0.230505	582.478	0.153089	0.223376	0.0014877	0.344203	200471	31.3735	Huyi District	Xi’an City
2021	8	0.832181	0.183864	58.94	11.9951	0.00458257	415600	5.78217	53891.6	2131.81	0.230766	569.579	0.149476	0.210072	0.00148938	0.344324	205049	25.5401	Huyi District	Xi’an City
2012	9	0.129187	0.024368	60	9.88722	0.00250735	148600	2.52567	6799.6	613.026	0.275565	752.833	0.129914	0.243794	0.000774851	0.250455	240560	58.41	Chencang District	Baoji City
2013	9	0.217205	0.053744	61	11.6679	0.00230089	175936	2.67656	6238.37	659.021	0.276091	739.082	0.135894	0.247819	0.00082069	0.255526	231078	58.895	Chencang District	Baoji City
2014	9	0.343464	0.077975	60.46	10.8671	0.00239424	183899	2.87198	6263.88	702.427	0.276803	743.764	0.136659	0.241854	0.000911759	0.258431	224800	58.118	Chencang District	Baoji City
2015	9	0.315609	0.082833	60	11.187	0.00228854	234520	2.462	6277.83	597.573	0.276711	749.717	0.13365	0.292105	0.000955917	0.253798	233370	58.102	Chencang District	Baoji City
2016	9	0.36131	0.083667	60.7	11.554	0.00195802	208099	2.71466	15769.2	666.586	0.279087	734.761	0.136975	0.272865	0.000852018	0.254845	226699	57.437	Chencang District	Baoji City
2017	9	0.426023	0.086145	60.5	11.2192	0.00240711	181800	3.16336	13320.7	788.546	0.280029	734.711	0.141568	0.238497	0.00087739	0.25575	224139	57.425	Chencang District	Baoji City
2018	9	0.39627	0.081559	60.39	10.764	0.00244382	204100	3.52449	10872.1	876.984	0.280844	733.913	0.165176	0.188022	0.000925069	0.25654	197274	50.892	Chencang District	Baoji City
2019	9	0.571283	0.125366	60.25	10.7872	0.00271608	235300	3.55867	8423.57	883.42	0.285646	723.253	0.149701	0.209541	0.000940885	0.257236	203032	50.799	Chencang District	Baoji City
2020	9	0.763197	0.169163	47.92	10.5352	0.00321644	256600	4.62644	8488.99	908.771	0.290614	893.802	0.135078	0.225947	0.000957251	0.257853	208790	50.706	Chencang District	Baoji City
2021	9	0.928933	0.213066	35.59	10.92	0.00319631	268500	5.69421	8528.38	994.512	0.295758	1182.52	0.121241	0.226799	0.000974196	0.258404	214548	50.613	Chencang District	Baoji City
2012	10	0.257941	0.050831	32	10.319	0.0036654	141403	2.41219	1721.29	894.438	0.134163	723.656	0.301669	0.376694	0.000820486	0.236635	134187	24.89	Mei County	Baoji City
2013	10	0.354144	0.080182	33	11.8603	0.00347558	149695	2.74455	156.237	1056.83	0.133984	702.667	0.328446	0.366317	0.000862515	0.241796	126030	23.401	Mei County	Baoji City
2014	10	0.459095	0.115766	33	11.0266	0.00348953	164704	3.17667	15543.7	1220.89	0.13414	701.848	0.33267	0.347224	0.000949873	0.245907	126173	22.594	Mei County	Baoji City
2015	10	0.414973	0.098499	33	11.392	0.00313553	179783	3.2397	15624.2	1246.04	0.133707	704.121	0.356689	0.351387	0.000989843	0.241458	123284	22.308	Mei County	Baoji City
2016	10	0.432745	0.107554	32.83	11.6744	0.00287616	190612	3.51843	13839.6	1346.27	0.134059	705.909	0.374404	0.334787	0.000949299	0.242647	117587	21.566	Mei County	Baoji City
2017	10	0.481326	0.107319	30.5	11.3509	0.00314599	196631	4.22689	15623.8	1502.56	0.134071	759.77	0.379866	0.303168	0.00103569	0.243675	116083	21.28	Mei County	Baoji City
2018	10	0.421539	0.054497	30.43	10.8787	0.00380421	209778	4.51584	17408.1	1596.51	0.134082	761.453	0.614557	0.279431	0.00107893	0.244574	72501	13.112	Mei County	Baoji City
2019	10	0.513339	0.06808	30.36	11.0435	0.00395849	212092	5.31122	19192.3	1878.96	0.134372	761.561	0.609617	0.257477	0.00181653	0.245366	73228	13.087	Mei County	Baoji City
2020	10	0.624332	0.083062	28.12	10.8999	0.0038222	218675	6.29498	1937.39	2063.11	0.134664	820.448	0.604773	0.252756	0.00255732	0.24607	73955	13.062	Mei County	Baoji City
2021	10	0.737367	0.099005	25.88	11.3043	0.00429361	225258	7.27873	19489.9	2328.64	0.134956	889.529	0.600024	0.240113	0.00330133	0.246699	74682	13.037	Mei County	Baoji City
2012	11	0.100383	0.009645	44	12.268	0.0018477	153399	1.86227	182.449	1160.99	0.594425	754.523	0.195119	0.366186	0.00120486	0.238118	280526	47.89	Fufeng County	Baoji City
2013	11	0.216794	0.053666	45	13.8692	0.00170869	162189	2.114	1637.33	1349.36	0.603219	727	0.193613	0.346812	0.00128381	0.24331	273050	48.471	Fufeng County	Baoji City
2014	11	0.349602	0.082787	45	13.0489	0.00213601	176399	2.23489	16454	1426.52	0.609178	719.889	0.191794	0.348714	0.00132737	0.247458	265514	48.427	Fufeng County	Baoji City
2015	11	0.401086	0.102297	45	13.1552	0.00191132	201819	2.17489	16523.2	1388.23	0.620537	706.711	0.179795	0.369681	0.00138356	0.241704	280898	48.484	Fufeng County	Baoji City
2016	11	0.42346	0.117727	45.13	13.7904	0.00158124	218789	2.39663	631.314	1534.18	0.632977	690.826	0.182936	0.346637	0.0011547	0.242886	272954	47.899	Fufeng County	Baoji City
2017	11	0.499801	0.126427	42.37	13.3056	0.00208788	222691	2.94195	7835.42	1768.09	0.639935	727.826	0.179286	0.307487	0.00136196	0.243908	269563	47.916	Fufeng County	Baoji City
2018	11	0.537284	0.131692	42.26	12.8238	0.00211562	236639	3.39789	15039.5	1984	0.644681	724.349	0.188909	0.258162	0.00143739	0.244802	257351	45.264	Fufeng County	Baoji City
2019	11	0.627944	0.152815	42.15	12.9696	0.00222877	251675	3.49897	22243.6	2087.11	0.64601	724.745	0.189227	0.257759	0.00114574	0.24559	256168	45.184	Fufeng County	Baoji City
2020	11	0.756368	0.176573	31.32	12.8398	0.00248101	258200	4.93317	2241.96	2191.58	0.647345	973.34	0.189548	0.257235	0.000852878	0.24629	254985	45.104	Fufeng County	Baoji City
2021	11	0.870617	0.193439	20.49	13.0526	0.00279041	264725	6.36737	22491.4	2461.96	0.648686	1484.72	0.189872	0.239456	0.000558806	0.246915	253802	45.024	Fufeng County	Baoji City
2012	12	0.403667	0.101598	51	10.9678	0.00174287	159456	2.79546	14834.4	1212.98	0.477998	905.51	0.139911	0.236721	0.000822849	0.255917	270408	55.873	Fengxiang District	Baoji City
2013	12	0.437645	0.069563	52	12.7246	0.0016463	176949	3.11462	13654.5	1373.71	0.47641	891.058	0.152976	0.229181	0.00088486	0.261562	260048	56.132	Fengxiang District	Baoji City
2014	12	0.509976	0.093118	53	11.9003	0.00194458	190019	3.43377	13777.1	1542.07	0.47644	874.189	0.165003	0.218919	0.000928084	0.265404	256353	55.271	Fengxiang District	Baoji City
2015	12	0.469383	0.096938	52.26	12.0899	0.00175558	220305	3.59285	13723.7	1592.54	0.481838	876.636	0.163894	0.216678	0.000960426	0.260672	264037	55.007	Fengxiang District	Baoji City
2016	12	0.303503	0.054208	53	12.5819	0.00148016	245255	3.81275	16613.5	1713.66	0.482776	862.717	0.168539	0.208859	0.000787333	0.261734	256439	54.341	Fengxiang District	Baoji City
2017	12	0.32724	0.054465	52.68	12.1852	0.00190658	197257	3.96453	11699	1771.42	0.484227	865.357	0.17144	0.206964	0.000811635	0.262654	253150	54.301	Fengxiang District	Baoji City
2018	12	0.366376	0.06843	49.21	11.7915	0.00184924	210928	4.45598	6784.43	1838.84	0.480893	932.798	0.167782	0.185598	0.000806048	0.263458	256816	55.357	Fengxiang District	Baoji City
2019	12	0.409426	0.063603	48.98	11.7489	0.00196312	220638	4.56625	1869.88	1896.99	0.483463	932.197	0.168525	0.196182	0.000657045	0.264167	255007	55.266	Fengxiang District	Baoji City
2020	12	0.483642	0.065047	48.75	11.5929	0.00263645	249320	4.91829	18746.8	2033.64	0.48606	931.59	0.169279	0.198178	0.000550479	0.264797	253198	55.175	Fengxiang District	Baoji City
2021	12	0.527591	0.071066	38.62	11.8239	0.00262688	278002	6.8435	18826.9	2241.7	0.488686	1169.63	0.170043	0.193556	0.00035421	0.26536	251389	55.084	Fengxiang District	Baoji City
2012	13	0.321168	0.059663	47	11.2915	0.0022631	141263	2.85128	744.328	1565.54	0.439522	749.723	0.0822358	0.241147	0.000681102	0.258596	275099	47.793	Qishan County	Baoji City
2013	13	0.37634	0.061949	48	12.9733	0.00200879	168248	3.1875	6443.27	1683.29	0.43956	734.042	0.093111	0.244239	0.000737924	0.264278	265060	48.626	Qishan County	Baoji City
2014	13	0.494068	0.093638	47.7	12.1019	0.00236481	172759	3.12579	6473.42	1741.82	0.439522	738.721	0.0924476	0.252105	0.00107841	0.268643	265783	48.292	Qishan County	Baoji City
2015	13	0.269748	0.061312	48	12.3033	0.00221684	203824	2.99688	6445.22	1680.49	0.439522	734.104	0.0925391	0.267308	0.00105003	0.264089	270048	48.201	Qishan County	Baoji City
2016	13	0.32956	0.069861	47.36	12.8034	0.00190867	269664	3.29624	655.591	1823.71	0.439385	744.257	0.0939811	0.254235	0.000879483	0.264999	262308	47.593	Qishan County	Baoji City
2017	13	0.429824	0.072329	46.72	12.3951	0.00229459	251873	4.37457	3322.87	2203.62	0.438874	755.33	0.0943518	0.216541	0.000963473	0.265785	258649	47.526	Qishan County	Baoji City
2018	13	0.404114	0.070939	46.6	11.9418	0.00242996	261159	4.14372	5990.15	2255.81	0.438912	757.21	0.107025	0.202258	0.000963555	0.266472	226246	40.684	Qishan County	Baoji City
2019	13	0.462911	0.077828	46.48	12.0173	0.00252029	266868	3.8584	8657.43	2095.07	0.438937	759.122	0.110207	0.235452	0.00107698	0.267077	223824	40.612	Qishan County	Baoji City
2020	13	0.553186	0.093234	36.52	11.9512	0.00281355	262599	4.63189	8771.97	1975.4	0.438949	966.128	0.113459	0.268463	0.00119037	0.267614	221402	40.54	Qishan County	Baoji City
2021	13	0.636384	0.103568	26.56	12.181	0.00305246	258330	5.40538	886.458	2040.96	0.438962	1328.39	0.116782	0.277986	0.00130378	0.268094	218980	40.468	Qishan County	Baoji City
2012	14	0.236766	0.063906	27	8.99294	0.00234474	124368	1.63737	1735.58	190.162	0.25473	1306.7	0.114717	0.615781	0.000425158	0.246255	110803	33.622	Long County	Baoji City
2013	14	0.20376	0.051219	27	10.7252	0.00209643	130086	1.84747	1616.55	219.06	0.253615	1312.44	0.13144	0.574902	0.000451518	0.249429	101012	33.922	Long County	Baoji City
2014	14	0.307338	0.065322	27	9.99992	0.00234746	139004	2.11737	1646.93	251.032	0.253308	1314.04	0.134784	0.534113	0.000479157	0.251763	100101	32.679	Long County	Baoji City
2015	14	0.296508	0.081463	27	10.3015	0.00202375	154625	2.21475	166.659	262.538	0.253572	1312.67	0.129326	0.524709	0.000507872	0.238696	105230	32.73	Long County	Baoji City
2016	14	0.339339	0.065998	27.28	10.6721	0.00173141	173820	2.47617	2244.57	296.662	0.25378	1298.13	0.130602	0.487026	0.000423573	0.23972	103314	32.269	Long County	Baoji City
2017	14	0.396204	0.053265	25.29	10.3921	0.00206736	183691	3.35389	1601.22	372.508	0.254103	1398.5	0.14488	0.408836	0.000508935	0.240602	100000	31.944	Long County	Baoji City
2018	14	0.423646	0.065849	25.25	9.92996	0.0021587	183691	3.85827	957.876	427.849	0.254161	1400.4	0.140057	0.324543	0.00050905	0.24137	103672	32.3315	Long County	Baoji City
2019	14	0.544727	0.084161	25.2	9.97757	0.00239895	235636	3.63352	314.53	402.077	0.254297	1402.42	0.136045	0.375708	0.000707394	0.242044	104296	32.719	Long County	Baoji City
2020	14	0.716158	0.102473	20.85	9.66812	0.00284221	243907	4.73199	337.339	433.297	0.254434	1694.1	0.132082	0.376813	0.000905951	0.242641	104920	33.1065	Long County	Baoji City
2021	14	0.858772	0.120785	16.5	10.1094	0.00274097	252178	5.83046	35.8261	478.033	0.254571	2139.58	0.128165	0.367087	0.00110472	0.243173	105544	33.494	Long County	Baoji City
2012	15	0.178079	0.045799	13	10.6316	0.00187797	77806	1.99538	398.557	260.442	0.222775	2714.15	0.191074	0.542544	0.000340097	0.237268	61280	19.845	Qianyang County	Baoji City
2013	15	0.20922	0.04176	13	12.4439	0.00164994	84702	2.38538	384.924	311.033	0.423193	1428.77	0.228907	0.498833	0.000753742	0.240487	55053	19.506	Qianyang County	Baoji City
2014	15	0.309447	0.06667	13	11.7181	0.00194804	97571	2.69692	3813.16	351.655	0.423353	1428.23	0.230119	0.458103	0.000754026	0.244285	56297	19.004	Qianyang County	Baoji City
2015	15	0.35048	0.089331	13	11.896	0.00169192	104636	3.16238	384.568	412.337	0.423695	1427.08	0.213061	0.410275	0.000808538	0.231054	58908	18.559	Qianyang County	Baoji City
2016	15	0.405364	0.075631	13.46	12.3347	0.00145761	121453	3.61516	3928.13	488.064	0.422624	1381.8	0.218015	0.372561	0.00059143	0.232046	56707	18.238	Qianyang County	Baoji City
2017	15	0.473966	0.088212	12.59	11.9803	0.00179679	119431	4.31612	4416.63	545.035	0.42086	1483.48	0.223997	0.338653	0.000642501	0.232903	55023	17.867	Qianyang County	Baoji City
2018	15	0.503758	0.1128	12.57	11.681	0.00183157	129604	4.75481	4905.14	599.386	0.421763	1482.66	0.205448	0.276031	0.00064388	0.233651	57455	18.271	Qianyang County	Baoji City
2019	15	0.622204	0.116867	12.54	11.5835	0.00191056	143863	5.39838	5393.65	678.951	0.422966	1481.98	0.217702	0.27536	0.00102238	0.23431	57179	17.536	Qianyang County	Baoji City
2020	15	0.784676	0.120934	9.95	11.2494	0.00249676	148560	7.41939	5462.24	740.45	0.432222	1827.74	0.230076	0.281535	0.00142967	0.234894	56903	16.801	Qianyang County	Baoji City
2021	15	0.864215	0.125094	7.36	11.5693	0.00255338	153257	9.44039	5514.13	822.52	0.441893	2416.85	0.24257	0.279591	0.00185518	0.235417	56627	16.066	Qianyang County	Baoji City
2012	16	0.324597	0.048251	44.02	9.1551	0.00306593	122768	9.24943	14552	7007.92	0.0785932	395.048	0.272326	0.0155487	0.000460035	0.278352	26527	7.825	Weibin District	Baoji City
2013	16	0.372955	0.064465	44.18	10.8526	0.0028429	132242	9.67665	13273.5	7353.7	0.210138	147.216	0.335364	0.0162802	0.00123001	0.283389	22000	7.638	Weibin District	Baoji City
2014	16	0.431154	0.082545	43.48	10.012	0.00279098	157452	1.2569	13315.4	7671.26	0.21392	146.941	0.36155	0.016687	0.00125215	0.286676	20000	7.385	Weibin District	Baoji City
2015	16	0.402132	0.094382	43.63	10.4277	0.00280148	182538	1.77149	13341.8	8088.81	0.228972	136.81	0.104142	0.016461	0.00117273	0.268311	19896	6.704	Weibin District	Baoji City
2016	16	0.256889	0.069706	43.6	10.6352	0.0024089	182538	11.4794	1339.4	8614.46	0.230323	136.101	0.31577	0.0155512	0.00101112	0.268858	15866	5.509	Weibin District	Baoji City
2017	16	0.300275	0.070141	45.61	10.3799	0.00300847	165090	11.6459	1435.51	9142.34	0.245595	122.013	0.381069	0.0152322	0.00107817	0.269332	13512	4.768	Weibin District	Baoji City
2018	16	0.345859	0.076714	45.53	9.90377	0.0029721	188321	11.9987	1531.62	9402.75	0.25184	119.196	0.396675	0.0145742	0.00110558	0.269746	11788	3.924	Weibin District	Baoji City
2019	16	0.375486	0.088374	45.45	10.0165	0.0032727	183678	11.4662	1627.73	8969.71	0.267777	112.299	0.416412	0.0165261	0.00117555	0.27011	10127	3.553	Weibin District	Baoji City
2020	16	0.430672	0.100034	53.58	9.64799	0.0038194	197776	9.99235	14489.3	9214.97	0.269042	94.8115	0.443893	0.0173012	0.0011811	0.270434	8466	3.182	Weibin District	Baoji City
2021	16	0.485858	0.111694	61.71	10.1215	0.00421676	211874	8.51847	12693.9	9460.24	0.270319	81.9316	0.484791	0.0180362	0.00118671	0.270724	6805	2.811	Weibin District	Baoji City
2012	17	0.223325	0.050469	38.76	12.0264	0.00216917	116692	6.22423	8534.73	7807.44	0.400126	129.825	0.169109	0.015692	0.00258347	0.267238	36787	11.96	Jintai District	Baoji City
2013	17	0.302062	0.024695	38.47	13.9052	0.00217104	126698	7.16743	7853.69	8923.3	0.187331	279.387	0.180161	0.0149552	0.00130257	0.272671	34114	11.795	Jintai District	Baoji City
2014	17	0.314582	0.0256	38.26	13.1043	0.00220695	140635	7.72216	7993.22	9561.49	0.189714	277.392	0.164481	0.014747	0.00131914	0.274993	33019	11.684	Jintai District	Baoji City
2015	17	0.445103	0.087826	38.01	13.4109	0.00204814	168255	8.39463	899.629	9845.63	0.197861	267.719	0.137823	0.0148562	0.00137579	0.256608	36866	11.566	Jintai District	Baoji City
2016	17	0.176927	0.051628	37.79	13.927	0.00166674	168255	8.9574	874.285	10954.7	0.198917	267.849	0.133067	0.0141524	0.00118554	0.257144	35591	11.415	Jintai District	Baoji City
2017	17	0.289473	0.065546	40.13	13.4608	0.0022783	178504	8.91627	5362.18	11579.6	0.197415	254.149	0.1366	0.0135088	0.00127463	0.257608	35000	11.206	Jintai District	Baoji City
2018	17	0.356649	0.107731	39.98	12.8998	0.00221736	188139	9.27885	9850.08	11995.1	0.198818	253.302	0.117301	0.0116903	0.0012837	0.258013	38269	11.353	Jintai District	Baoji City
2019	17	0.314078	0.081091	39.83	12.9393	0.00246316	192089	9.16269	14338	11810.7	0.200043	252.699	0.125756	0.0127272	0.0012916	0.25837	35696	11.041	Jintai District	Baoji City
2020	17	0.271507	0.05445	46.1	12.6084	0.00332499	196936	7.86443	15726.7	11733	0.203316	214.816	0.135525	0.0136715	0.00131273	0.258687	33123	10.729	Jintai District	Baoji City
2021	17	0.228936	0.042136	52.37	12.8839	0.00304785	201783	6.56616	1789.85	11655.3	0.206697	186.003	0.146939	0.0146283	0.00133457	0.25897	30550	10.417	Jintai District	Baoji City
2012	18	0.460683	0.086908	53	14.1061	0.00140196	159800	2.22679	466.286	1490.15	1.87085	180.736	0.156461	0.536144	0.0041758	0.240141	257271	51.746	Jingyang County	Xianyang City
2013	18	0.470409	0.118788	54	16.0821	0.00128133	209128	2.51852	46.4358	1704.67	0.403651	822.167	0.160037	0.519537	0.00103611	0.246221	242444	51.531	Jingyang County	Xianyang City
2014	18	0.565898	0.143886	54	15.1756	0.00157016	218719	2.81537	382.566	1919.57	0.409555	810.315	0.152644	0.485296	0.00107411	0.249717	239839	50.815	Jingyang County	Xianyang City
2015	18	0.700643	0.147693	54	15.195	0.00135636	219136	2.96722	3794.86	2023.11	0.415798	798.148	0.138141	0.472235	0.00113689	0.255434	247212	50.469	Jingyang County	Xianyang City
2016	18	0.630292	0.142853	54.21	15.8157	0.00120943	247594	3.32712	3583.93	2260.61	0.422075	783.232	0.144404	0.441985	0.000847877	0.256386	240797	50.1	Jingyang County	Xianyang City
2017	18	0.31682	0.064166	31.66	15.2603	0.00180917	220301	2.39924	2538.89	1332.63	0.426739	1326.44	0.154195	0.695764	0.000928682	0.257209	163222	34.416	Jingyang County	Xianyang City
2018	18	0.304227	0.05209	31.48	15.2003	0.00136223	220964	2.39616	1493.84	1323.35	0.585516	972.268	0.137813	0.632339	0.00120887	0.257927	161015	33.443	Jingyang County	Xianyang City
2019	18	0.321321	0.061575	31.58	15.0683	0.00170691	230159	2.39837	448.799	1328.6	0.581715	975.522	0.169181	0.669584	0.00123349	0.25856	161058	33.384	Jingyang County	Xianyang City
2020	18	0.348604	0.076154	24.17	14.7596	0.00168149	254466	3.34741	466.747	1419.25	0.581715	1274.6	0.200533	0.66402	0.00126595	0.259121	161101	33.4202	Jingyang County	Xianyang City
2021	18	0.415569	0.098831	16.76	14.9816	0.00230421	278773	4.29646	3889.99	2048.74	0.581715	1838.13	0.231867	0.485766	0.00129841	0.259622	161144	33.4565	Jingyang County	Xianyang City
2012	19	0.179668	0.006139	42	14.0559	0.00137412	158501	2.86857	6719.63	2088.04	0.708749	733.5	0.156026	0.374099	0.000779044	0.239501	206504	42.11	Sanyuan County	Xianyang City
2013	19	0.221202	0.047657	43	16.021	0.00114554	184626	3.27465	6655.24	2440.38	0.657505	772.279	0.161499	0.347202	0.00084317	0.246371	200001	42.064	Sanyuan County	Xianyang City
2014	19	0.380535	0.102677	42	15.1047	0.00151536	188235	3.81262	6482.65	2775.22	0.659073	788.786	0.144318	0.317897	0.000875366	0.249868	195125	40.834	Sanyuan County	Xianyang City
2015	19	0.461285	0.126641	42	15.1485	0.00122426	222117	4.22929	6473.15	3078.51	0.660548	787.024	0.144318	0.289407	0.000937831	0.255258	201111	40.508	Sanyuan County	Xianyang City
2016	19	0.408077	0.112943	41.76	15.7627	0.00107098	219181	4.63386	6568.3	3353.73	0.66205	789.751	0.144217	0.274307	0.000697392	0.256026	196010	40.192	Sanyuan County	Xianyang City
2017	19	0.459745	0.101876	41.23	15.2392	0.00167363	238264	5.72617	7009.79	4091.68	0.66362	798.011	0.14963	0.229451	0.000759832	0.256691	194981	39.816	Sanyuan County	Xianyang City
2018	19	0.461061	0.134877	41.17	15.2609	0.00119468	256131	5.82355	7451.28	4155.21	0.664954	797.571	0.151083	0.197525	0.000761359	0.257272	188916	38.007	Sanyuan County	Xianyang City
2019	19	0.503538	0.140381	41.19	15.0808	0.0015454	279605	5.22816	7892.77	3732.2	0.66668	795.12	0.154907	0.238183	0.000763335	0.257783	188519	37.938	Sanyuan County	Xianyang City
2020	19	0.623378	0.155988	35.73	14.6603	0.00164772	282681	5.8147	7835.84	3600.67	0.667107	916.037	0.158748	0.265822	0.000763825	0.258237	188122	37.869	Sanyuan County	Xianyang City
2021	19	0.731463	0.171834	30.27	14.9059	0.00218422	285757	6.40123	745.493	4091.59	0.667536	1080.57	0.162605	0.250594	0.000764316	0.258642	187725	37.8	Sanyuan County	Xianyang City
2012	20	0.28259	0.075062	50	12.8973	0.00152011	168364	2.1724	2824.18	1074.38	0.0989199	653.76	0.721485	0.612492	0.000978953	0.25071	128485	27.37	Liquan County	Xianyang City
2013	20	0.27302	0.086677	50	14.7036	0.00149152	200351	2.5572	28271.4	1263.44	0.104813	617	0.899986	0.57032	0.00123177	0.257292	123113	27.41	Liquan County	Xianyang City
2014	20	0.352879	0.077286	51	13.8437	0.00173398	195649	2.84353	28647	1433	0.107665	588.882	0.902283	0.538964	0.00129857	0.260899	120041	26.865	Liquan County	Xianyang City
2015	20	0.422187	0.093031	51	13.8722	0.00154684	186524	2.97759	28767.2	1500.3	0.112021	565.98	0.854577	0.524929	0.00138576	0.266594	125138	26.613	Liquan County	Xianyang City
2016	20	0.45571	0.090666	48.42	14.5132	0.00133611	227528	3.39128	28723	1622.04	0.111979	596.365	0.812847	0.5185	0.000657986	0.26809	121414	26.336	Liquan County	Xianyang City
2017	20	0.539241	0.116391	45.68	14.0293	0.00191455	257975	3.81283	20306.5	1721.05	0.111986	632.093	0.745535	0.509552	0.000692665	0.269388	120158	26.036	Liquan County	Xianyang City
2018	20	0.527533	0.125476	45.58	13.7465	0.00165323	283000	3.52162	11889.9	1586.12	0.112017	633.304	0.711684	0.475343	0.000727499	0.270524	115859	25.51	Liquan County	Xianyang City
2019	20	0.589749	0.141347	45.38	13.7359	0.00182248	286032	3.38255	3473.4	1516.8	0.112115	635.544	0.741481	0.529635	0.00072813	0.271526	112282	25.333	Liquan County	Xianyang City
2020	20	0.659157	0.161811	36.56	13.5256	0.00184008	320209	4.27188	3445.72	1543.28	0.112185	788.375	0.77324	0.552556	0.000728585	0.272418	108705	25.156	Liquan County	Xianyang City
2021	20	0.752662	0.186735	27.74	13.7576	0.00253423	343536	5.16122	32534.6	1700.89	0.112255	1038.39	0.807159	0.530398	0.00072904	0.273216	105128	24.979	Liquan County	Xianyang City
2012	21	0.195534	0.039161	49.78	13.5037	0.00163259	148444	6.62997	28872.3	25644.1	0.0231598	578.284	0.215093	0.0721149	0.000694758	0.245197	70388	14.178	Qindu District	Xianyang City
2013	21	0.262287	0.051267	50.63	15.3286	0.00138169	176133	7.41244	2956	29160.1	0.064509	204.128	0.226047	0.0720637	0.00212869	0.251633	62770	13.549	Qindu District	Xianyang City
2014	21	0.507625	0.112071	50.45	14.3657	0.00192601	178070	8.42439	29515.9	33023.3	0.0669243	197.463	0.228217	0.0671984	0.00230877	0.254666	58922	13.101	Qindu District	Xianyang City
2015	21	0.568289	0.128633	51.16	14.4849	0.00177085	179622	9.11923	29298	36250.2	0.0749859	173.788	0.223859	0.0641716	0.00269936	0.259659	60011	12.895	Qindu District	Xianyang City
2016	21	0.320809	0.083461	52.02	15.0824	0.00154946	226998	9.98847	29446.9	40373	0.0782145	163.86	0.23447	0.0609963	0.002229	0.260464	56118	12.07	Qindu District	Xianyang City
2017	21	0.342217	0.09028	35.3	14.5607	0.00193035	225770	11.3598	20844.4	31157.7	0.0782145	241.473	0.261612	0.0328805	0.002229	0.261161	30056	6.365	Qindu District	Xianyang City
2018	21	0.252366	0.050753	35.12	14.2172	0.00165324	218498	1.93417	12242	29745.1	0.186594	101.737	0.301321	0.0340484	0.00307865	0.26177	24834	4.981	Qindu District	Xianyang City
2019	21	0.303836	0.054281	34.9	14.3049	0.00209801	222983	9.85244	3639.57	26717.2	0.18463	103.467	0.280018	0.0391275	0.00304625	0.262307	24752	4.328	Qindu District	Xianyang City
2020	21	0.369451	0.06488	49.16	13.9726	0.0019486	236490	7.36249	36529.1	28122.8	0.187539	72.3149	0.258573	0.0383312	0.00309423	0.262784	24670	3.675	Qindu District	Xianyang City
2021	21	0.437722	0.076808	63.42	14.2268	0.00265389	249997	4.87254	34919.5	29528.4	0.19054	55.1719	0.236986	0.0376107	0.00314376	0.26321	24588	3.022	Qindu District	Xianyang City
2012	22	0.0912284	0.018596	41.22	13.9431	0.00132385	118807	6.46385	223.935	9795.59	0	83.5274	0.0933045	0.0752875	0.00551844	0.243142	107594	21.886	Weicheng District	Xianyang City
2013	22	0.169097	0.047361	41.54	15.9011	0.00108345	134161	7.34762	2296.54	11221.3	0	315.936	0.0988821	0.0731656	0.00167632	0.248883	97237	21.279	Weicheng District	Xianyang City
2014	22	0.265395	0.059441	41.57	14.9033	0.00163757	149388	7.61198	22447.8	11633.5	0	304.547	0.0902842	0.0735408	0.00181675	0.252062	92962	20.663	Weicheng District	Xianyang City
2015	22	0.300964	0.07661	41.21	14.9585	0.0014793	158298	7.59743	22541.5	11510.7	0	301.407	0.0967908	0.0769536	0.00193221	0.257086	94916	20.309	Weicheng District	Xianyang City
2016	22	0.240855	0.048514	41.52	15.5931	0.00128337	192938	8.36848	22726.6	12680.1	0	291.426	0.0973792	0.0724735	0.00115702	0.258238	88941	19.123	Weicheng District	Xianyang City
2017	22	0.249824	0.052075	21.6	15.0449	0.00175724	148474	14.7374	16088.7	11173.5	0	553.889	0.0980522	0.0852158	0.00117018	0.259243	82966	17.937	Weicheng District	Xianyang City
2018	22	0.358424	0.071671	21.29	14.8049	0.00136151	134849	17.7886	9450.74	13923.5	0	555.566	0.0988297	0.0707686	0.00118363	0.260127	76991	16.751	Weicheng District	Xianyang City
2019	22	0.352109	0.091266	21.37	14.7885	0.00181285	115913	12.7192	2812.82	9433.46	0	547.122	0.0997381	0.107971	0.0011974	0.260912	71016	15.565	Weicheng District	Xianyang City
2020	22	0.427552	0.109066	30.35	14.4132	0.00162138	117126	9.46787	28378.8	10094.5	0	380.758	0.100813	0.104188	0.00121149	0.261613	65041	14.379	Weicheng District	Xianyang City
2021	22	0.502995	0.123599	39.33	14.6164	0.00241062	118339	6.21656	27274	10755.5	0	290.364	0.102106	0.10087	0.00122592	0.262242	59066	13.193	Weicheng District	Xianyang City
2012	23	0.137414	0.031409	60	12.7465	0.00150549	172992	1.815	2755.94	1077.67	1.87472	188.067	1.02371	0.394987	0.00283587	0.250203	268199	55.967	Qian County	Xianyang City
2013	23	0.203165	0.056591	60	14.401	0.00140311	196555	2.12167	2515.33	1268.3	0.412704	854.3	1.08899	0.366286	0.000721839	0.256788	253101	55.853	Qian County	Xianyang City
2014	23	0.414261	0.10222	60	13.5637	0.00183678	223096	2.41733	2637.31	1446.06	0.423808	831.917	0.338131	0.354046	0.000761294	0.260208	267077	54.853	Qian County	Xianyang City
2015	23	0.456737	0.105399	60	13.6159	0.00164641	228156	2.51233	2337.76	1502.89	0.436686	807.383	0.346174	0.355145	0.00080507	0.265953	262897	54.519	Qian County	Xianyang City
2016	23	0.455802	0.115607	59.92	14.3364	0.00132134	239018	2.79947	278.4	1618.94	0.453665	778.204	0.357548	0.342479	0.000621917	0.266355	255915	54.181	Qian County	Xianyang City
2017	23	0.472004	0.102912	53.66	13.8448	0.00189542	280015	3.3347	8301.26	1784.05	0.453548	869.214	0.44582	0.315442	0.000621757	0.266705	251617	53.82	Qian County	Xianyang City
2018	23	0.524809	0.131802	53.61	13.3453	0.00175703	290402	3.2396	16324.1	1731.27	0.450486	875.937	0.43917	0.290659	0.00061756	0.267012	254480	54.404	Qian County	Xianyang City
2019	23	0.5549	0.141223	53.57	13.4759	0.00187318	313800	3.23697	24347	1711.09	0.45089	875.807	0.447165	0.306254	0.000639427	0.267284	249713	54.264	Qian County	Xianyang City
2020	23	0.64853	0.158627	45.67	13.3266	0.0019851	320210	3.47515	2452.33	1551.56	0.449481	1030.52	0.455472	0.351163	0.000658678	0.267526	244946	54.124	Qian County	Xianyang City
2021	23	0.768733	0.177394	37.77	13.5503	0.00259407	327276	3.71333	23517.7	1752.84	0.448082	1249.96	0.464108	0.322715	0.000677808	0.267744	240179	53.984	Qian County	Xianyang City
2012	24	0.0829009	0.014443	46	12.5265	0.00193092	141676	1.61174	14477.7	1862.81	0.270436	1029.52	0.141023	0.395534	0.000506778	0.252778	210562	41.065	Wugong County	Xianyang City
2013	24	0.193765	0.04973	46	14.0692	0.00170644	165429	2.85652	1454.9	2410.55	0.482784	576.696	0.14274	0.336693	0.00113088	0.259219	200000	40.494	Wugong County	Xianyang City
2014	24	0.377682	0.101988	45	13.2363	0.00223772	172433	2.44533	14754.8	2764.82	0.478474	594.822	0.135396	0.31632	0.0011955	0.26233	197222	39.655	Wugong County	Xianyang City
2015	24	0.428197	0.102294	45	13.4367	0.00198411	195187	2.49889	14859.7	2825.38	0.476002	597.911	0.131252	0.322503	0.00126366	0.268422	203144	39.43	Wugong County	Xianyang City
2016	24	0.460921	0.114493	44.81	14.0582	0.00157348	209098	2.75521	14925.6	3096.73	0.475454	601.138	0.134579	0.312536	0.000965215	0.270092	198003	39.138	Wugong County	Xianyang City
2017	24	0.503894	0.107285	42.09	13.5393	0.00218716	225441	3.34759	16092.9	3540.2	0.475137	640.413	0.137128	0.289039	0.00100167	0.271545	194191	38.87	Wugong County	Xianyang City
2018	24	0.545906	0.137233	41.74	12.9976	0.00214164	247989	3.38376	17260.3	3548.69	0.474925	646.071	0.136631	0.255704	0.00103831	0.27282	194795	38.482	Wugong County	Xianyang City
2019	24	0.645164	0.146251	41.48	13.2049	0.00239419	277382	3.69226	18427.6	3848.12	0.474732	650.386	0.134572	0.255462	0.000593076	0.273949	197849	38.409	Wugong County	Xianyang City
2020	24	0.765775	0.167391	31.77	13.0502	0.00250643	273935	4.86575	18556.9	3884.05	0.464201	868.429	0.132576	0.272572	0.00014498	0.274954	200903	38.336	Wugong County	Xianyang City
2021	24	0.91402	0.195906	22.06	13.3223	0.00293881	275818	6.03925	17796.4	4305.28	0.454128	1278.42	0.13064	0.263471	0.000141834	0.275856	203957	38.263	Wugong County	Xianyang City
2012	25	0.187634	0.051829	61	13.149	0.00183251	177113	2.38328	22154.6	2858.27	0.519449	472.361	0.0752073	0.224153	0.00097175	0.236443	222957	43.576	Xingping City	Xianyang City
2013	25	0.286456	0.070927	62	14.8324	0.00158143	197989	2.82613	22248.3	3449.21	0.417967	577.581	0.0762287	0.206902	0.00086568	0.242574	222003	44.26	Xingping City	Xianyang City
2014	25	0.386661	0.085725	62	13.9102	0.00213611	210795	2.94793	22578.4	3597.83	0.429173	562.5	0.0780064	0.210646	0.000917563	0.245554	216995	43.151	Xingping City	Xianyang City
2015	25	0.445868	0.111215	62	14.0984	0.00193467	251300	3.91924	22647.4	3773.61	0.441204	547.161	0.0755633	0.202854	0.000972763	0.250944	224011	42.946	Xingping City	Xianyang City
2016	25	0.471192	0.098281	61.42	14.71	0.00162907	262500	3.54396	22777.5	4284.84	0.457901	532.188	0.0773515	0.19068	0.000703644	0.252389	218147	42.647	Xingping City	Xianyang City
2017	25	0.563616	0.135105	50.97	14.1838	0.00207742	285083	4.7343	24568.9	5322.52	0.475307	617.814	0.077351	0.163571	0.000730391	0.253644	194671	38.655	Xingping City	Xianyang City
2018	25	0.600275	0.129058	50.61	13.7284	0.001921	289400	4.96742	26360.4	5481.9	0.531797	556.115	0.0758352	0.13162	0.000710606	0.254745	186668	36.448	Xingping City	Xianyang City
2019	25	0.626431	0.157421	50.63	13.8902	0.00226329	308908	4.77274	28151.9	5334.3	0.533959	553.644	0.0818394	0.150921	0.00107024	0.255718	189432	36.386	Xingping City	Xianyang City
2020	25	0.686599	0.15356	46.33	13.6577	0.00219715	312416	5.22577	28395.6	5344.59	0.535373	603.432	0.0876709	0.166259	0.00143077	0.256585	192196	36.3828	Xingping City	Xianyang City
2021	25	0.851973	0.144801	42.03	13.9378	0.00281066	318002	5.6788	27276.4	6202.07	0.536794	663.407	0.0933371	0.156741	0.00179321	0.257362	194960	36.3797	Xingping City	Xianyang City
2012	26	0.144511	0.044111	17	12.9671	0.0023656	100518	1.92941	7366.41	623.574	0.101891	1635.82	0.230524	0.16014	0.000323636	0.232485	46481	13.311	Tongguan County	Weinan City
2013	26	0.195065	0.054226	17	14.7644	0.00195643	106600	2.27941	7356.22	736.692	0.265954	626.706	0.274687	0.155365	0.000938615	0.240459	43100	13.294	Tongguan County	Weinan City
2014	26	0.298675	0.074065	16	13.8899	0.00242622	118600	2.56875	747.324	781.369	0.264317	670	0.280573	0.156445	0.000932836	0.243054	41009	13.18	Tongguan County	Weinan City
2015	26	0.327623	0.09261	16	13.8385	0.00237583	142800	2.28437	747.662	694.867	0.265779	666.312	0.256314	0.181289	0.0010318	0.25924	45339	13.361	Tongguan County	Weinan City
2016	26	0.405935	0.115163	15.52	14.22	0.00232433	136600	2.37758	7456.42	701.521	0.267486	682.539	0.263834	0.187225	0.00094402	0.260761	44039	13.421	Tongguan County	Weinan City
2017	26	0.548186	0.146315	15.94	14.1541	0.00247154	138800	2.87139	5032.92	870.152	0.265804	668.758	0.240626	0.156469	0.00121951	0.262079	44056	13.456	Tongguan County	Weinan City
2018	26	0.642025	0.167947	15.42	13.8428	0.00225687	140068	2.61665	2609.42	767.086	0.264737	694.099	0.217309	0.216468	0.00121461	0.263233	44324	13.174	Tongguan County	Weinan City
2019	26	0.700504	0.16744	15.12	14.2729	0.00232468	140289	2.92395	185.917	840.251	0.264317	708.995	0.221278	0.217982	0.000746269	0.264252	42363	13.09	Tongguan County	Weinan City
2020	26	0.769255	0.181638	12.53	13.8574	0.00246732	153036	3.51836	1651.26	838.12	0.264563	854.749	0.225632	0.238951	0.000280112	0.265158	40402	13.2397	Tongguan County	Weinan City
2021	26	0.859617	0.196798	9.94	14.0437	0.00341779	156609	4.11278	133.259	900.631	0.264811	1076.46	0.230431	0.241364	0.000373832	0.265968	38441	13.3895	Tongguan County	Weinan City
2012	27	0.213	0.064479	35	10.8216	0.00251011	195794	3.16257	11711.5	971.817	0.712228	305.429	0.224377	0.124807	0.00252572	0.224752	119562	27.355	Huazhou District	Weinan City
2013	27	0.331285	0.085249	35	12.4829	0.0020457	144750	3.26943	11985.8	1004.65	0.317794	684.514	0.23935	0.135701	0.00125219	0.232256	112300	27.469	Huazhou District	Weinan City
2014	27	0.457761	0.114519	35	11.672	0.00259428	151161	3.37143	11996.2	1016.24	0.318272	683.486	0.2446	0.144148	0.00137948	0.235791	110102	27.583	Huazhou District	Weinan City
2015	27	0.480406	0.107332	34	11.7369	0.00245097	183378	3.17735	11971.2	948.464	0.318272	703.588	0.229371	0.159035	0.00146309	0.251117	117639	27.697	Huazhou District	Weinan City
2016	27	0.415778	0.100779	34.1	12.023	0.00225212	171000	2.58797	11999.7	774.539	0.317874	702.405	0.235959	0.203164	0.00137776	0.252087	114575	27.811	Huazhou District	Weinan City
2017	27	0.431699	0.11826	32.8	11.8347	0.00277294	207170	2.89573	13784.2	833.889	0.320631	723.963	0.236834	0.194219	0.00126337	0.252933	114008	27.925	Huazhou District	Weinan City
2018	27	0.545834	0.129855	31.81	11.5817	0.00239937	224559	2.37692	15568.7	663.825	0.322178	742.911	0.197279	0.30025	0.00131178	0.253676	136700	29.9955	Huazhou District	Weinan City
2019	27	0.651426	0.135083	31.38	11.7885	0.0026281	249044	3.16562	17353.3	872.145	0.322752	751.753	0.192971	0.253167	0.00131412	0.254334	139736	32.066	Huazhou District	Weinan City
2020	27	0.728491	0.140977	26.86	11.4389	0.00270418	256038	3.59584	17332.5	847.975	0.322506	878.928	0.188685	0.285719	0.00131311	0.254921	142772	31.8507	Huazhou District	Weinan City
2021	27	0.814476	0.151447	22.34	11.7562	0.00367704	249695	4.02606	1741.66	983.143	0.32226	1057.56	0.184578	0.26829	0.00131211	0.255448	145808	31.6354	Huazhou District	Weinan City
2012	28	0.277111	0.08282	26	12.0069	0.00258129	123223	2.61154	3852.55	827.785	0.267876	909.385	0.0668489	0.126759	0.000253764	0.228073	80480		Huayin City	Weinan City
2013	28	0.330853	0.075189	27	13.6998	0.00211491	126280	2.74296	3821.33	906.487	0.496445	472.519	0.0688348	0.131754	0.000470293	0.232017	78100		Huayin City	Weinan City
2014	28	0.296263	0.073616	26	12.8512	0.00261845	127778	3.13462	3842.69	958.996	0.497655	489.5	0.101173	0.133438	0.000550012	0.235727	75000		Huayin City	Weinan City
2015	28	0.217879	0.039733	26	12.8899	0.00245396	135994	3.93769	3835.86	984.333	0.498595	488.577	0.0933119	0.134261	0.000551051	0.250738	82176		Huayin City	Weinan City
2016	28	0.188798	0.030561	25.47	13.2099	0.00236818	152133	2.74912	384.595	857.038	0.50347	493.914	0.09804	0.161512	0.000556439	0.250134	78519		Huayin City	Weinan City
2017	28	0.298978	0.038734	26.34	13.0578	0.00269572	186688	3.22551	2111.85	1039.9	0.504392	476.727	0.0962327	0.137253	0.000637095	0.249612	80004		Huayin City	Weinan City
2018	28	0.555973	0.094928	25.18	12.8082	0.0023746	204380	3.62389	3839.11	1115.81	0.503991	499.087	0.0700691	0.164621	0.000716161	0.249156	109863		Huayin City	Weinan City
2019	28	0.53104	0.094992	24.78	13.1256	0.00259252	206192	2.85673	5566.36	866.46	0.50391	507.224	0.0710363	0.232897	0.000716047	0.248755	108339		Huayin City	Weinan City
2020	28	0.604059	0.095895	20.51	12.696	0.00273115	210948	3.53412	5566.94	887.206	0.503991	612.725	0.0726115	0.247863	0.000716161	0.248399	106815	24.9867	Huayin City	Weinan City
2021	28	0.647085	0.101796	16.24	12.9838	0.00366424	215549	4.2115	548.562	949.816	0.504071	773.707	0.0742324	0.250591	0.000716275	0.248081	105291		Huayin City	Weinan City
2012	29	0.350384	0.088211	98.45	13.7405	0.00168354	274551	2.66653	2583.43	2077.29	2.34085	127.608	0.158412	0.200768	0.00604951	0.228296	367542	88.187	Linwei District	Weinan City
2013	29	0.342578	0.087872	99.36	15.4935	0.00138068	365762	2.75532	2568.16	2166.08	0.423169	699.426	0.172625	0.215698	0.00107921	0.231382	337679	85.894	Linwei District	Weinan City
2014	29	0.38152	0.096744	96.29	14.6277	0.00192486	380995	3.15495	2579.38	2403.86	0.423005	722.006	0.20176	0.207495	0.0011651	0.234713	333084	83.581	Linwei District	Weinan City
2015	29	0.458604	0.105882	96.8	14.7578	0.00154628	432053	3.16952	2578.88	2427.76	0.445828	681.436	0.198081	0.212986	0.0014402	0.251655	349473	82.967	Linwei District	Weinan City
2016	29	0.430834	0.101665	96.2	15.2129	0.00141677	472469	3.45818	2594.2	2632.38	0.447728	682.775	0.19572	0.206532	0.00133977	0.252076	342034	81.819	Linwei District	Weinan City
2017	29	0.494207	0.110286	90.01	14.8181	0.00199069	483563	4.11643	3009.94	2931.89	0.462778	705.999	0.198165	0.190098	0.00158937	0.252437	342311	81.452	Linwei District	Weinan City
2018	29	0.619266	0.139279	91.21	14.7193	0.00153857	500162	4.68113	3425.69	3320.57	0.477475	675.266	0.187026	0.20171	0.00185092	0.252751	363987	83.892	Linwei District	Weinan City
2019	29	0.558058	0.13451	91.48	14.7143	0.00182138	516550	4.67436	3841.43	3383.63	0.49472	649.803	0.208314	0.198876	0.00153085	0.253025	297441	68.223	Linwei District	Weinan City
2020	29	0.462287	0.109218	92	14.3888	0.00193422	520183	4.83152	3865.18	3496.63	0.558368	572.478	0.305862	0.193344	0.00129111	0.253268	230895	83.764	Linwei District	Weinan City
2021	29	0.366525	0.09824	92.52	14.676	0.00270293	523816	4.98869	3828.55	3609.63	0.640812	496.022	0.482406	0.188159	0.000980563	0.253484	164349	99.305	Linwei District	Weinan City
2012	30	0.133454	0.027428	73	14.4988	0.00140024	213522	1.37788	498.846	566.329	0.601489	535.836	0.245024	0.481181	0.00227528	0.249584	290151	63.396	Dali County	Weinan City
2013	30	0.179945	0.039428	73	16.2368	0.00115514	250532	1.54658	3946.93	618.468	0.30796	1046.56	0.266577	0.495006	0.00132201	0.254847	278100	63.373	Dali County	Weinan City
2014	30	0.216174	0.050598	73	15.3243	0.00175706	262388	1.53932	3549.94	632.714	0.310783	1037.05	0.305295	0.519814	0.00136054	0.259787	270535	62.274	Dali County	Weinan City
2015	30	0.248261	0.065471	74	15.4398	0.00131651	300869	1.41527	3394.96	589.696	0.316319	1005.14	0.308633	0.570804	0.00147889	0.277212	283119	62.212	Dali County	Weinan City
2016	30	0.260327	0.050473	73.14	15.8802	0.00126945	302274	1.58532	343.386	652.872	0.317811	1012.18	0.334397	0.543372	0.00139131	0.27841	275547	61.316	Dali County	Weinan City
2017	30	0.507282	0.067146	70.44	15.6411	0.00163258	370000	2.33975	933.038	912.387	0.332822	1003.58	0.309313	0.400478	0.00161263	0.27944	278689	61.545	Dali County	Weinan City
2018	30	0.486066	0.09675	69.63	15.5314	0.00127961	407096	2.16254	1522.69	847.846	0.348194	970.429	0.280581	0.512893	0.00177591	0.280336	296788	63.52	Dali County	Weinan City
2019	30	0.605441	0.124783	68.91	15.7245	0.00139834	427539	2.44616	2112.34	949.105	0.351813	970.483	0.26081	0.509632	0.00173455	0.281122	306810	63.413	Dali County	Weinan City
2020	30	0.72503	0.150876	59.29	15.1236	0.00173946	446363	2.96196	295.163	988.232	0.366141	1083.81	0.2456	0.538875	0.00174295	0.281817	316832	63.5037	Dali County	Weinan City
2021	30	0.83507	0.176968	49.67	15.4567	0.00244131	420136	3.47776	245.265	1083.68	0.381685	1241.03	0.231323	0.536478	0.00175205	0.282436	326854	63.5944	Dali County	Weinan City
2012	31	0.149893	0.03727	79	13.8569	0.00110596	237162	1.6457	524.952	820.77	0.434866	747.152	0.172599	0.27991	0.00106734	0.228122	360256	85.172	Pucheng County	Weinan City
2013	31	0.207498	0.047177	80	15.6232	0.00105209	265041	1.77337	515.872	895.644	0.262306	1223.19	0.189475	0.289777	0.000674467	0.234922	330097	84.684	Pucheng County	Weinan City
2014	31	0.254174	0.05992	79	14.7094	0.00151607	304836	1.91925	4959.38	957.197	0.27038	1201.68	0.208175	0.290715	0.000990172	0.236854	325337	83.783	Pucheng County	Weinan City
2015	31	0.344582	0.09384	79	14.819	0.00121696	348416	1.96456	4819.22	979.545	0.274959	1181.67	0.189579	0.293715	0.00102837	0.251432	352164	83.641	Pucheng County	Weinan City
2016	31	0.374086	0.094293	79.21	15.3863	0.00104962	372132	2.59462	4776.4	1029.86	0.281963	1149.26	0.19383	0.293835	0.00103259	0.251865	342191	82.76	Pucheng County	Weinan City
2017	31	0.450897	0.105202	75.2	15.044	0.00153273	419300	2.41396	5473.08	1146.02	0.291373	1171.45	0.189123	0.272077	0.00113516	0.252239	345384	82.154	Pucheng County	Weinan City
2018	31	0.586845	0.116501	74.36	15.039	0.00102351	474398	2.56366	6169.76	1203.49	0.289801	1191.11	0.173307	0.309512	0.00115162	0.252565	377849	87.944	Pucheng County	Weinan City
2019	31	0.700523	0.148858	73.62	15.0585	0.00123606	496776	2.63728	6866.45	1225.74	0.288709	1207.63	0.160364	0.328651	0.00041617	0.252851	375765	87.79	Pucheng County	Weinan City
2020	31	0.808117	0.163041	66.26	14.4588	0.00158395	484979	3.71773	6838.18	1284.95	0.289324	1338.92	0.160131	0.337122	0.00031561	0.253105	373681	87.8648	Pucheng County	Weinan City
2021	31	0.950908	0.193805	58.9	14.8514	0.00220057	505140	4.79818	673.845	1426.75	0.289942	1503.02	0.159896	0.324883	0.00105052	0.253332	371597	87.9397	Pucheng County	Weinan City
2012	32	0.0957969	0.021966	80	13.2989	0.00122625	251983	1.25125	1317.23	805.958	0.317128	1104.24	0.590693	0.396659	0.000599962	0.229329	380052	81.826	Fuping County	Weinan City
2013	32	0.152354	0.037232	81	15.1208	0.00113639	281364	1.48296	13125.7	967.15	0.394646	876.383	0.652081	0.370537	0.000817051	0.234045	360006	81.366	Fuping County	Weinan City
2014	32	0.250452	0.060473	80	14.2203	0.0015515	308006	1.69388	13198	1090.19	0.394563	887.525	0.745724	0.352357	0.000859131	0.23678	355004	80.181	Fuping County	Weinan City
2015	32	0.325659	0.092505	79	14.2653	0.00126935	350247	1.65	13135.4	1048.67	0.39561	896.38	0.763058	0.379273	0.00103087	0.250943	370656	80.557	Fuping County	Weinan City
2016	32	0.288704	0.063338	80.01	14.9285	0.0010439	372205	1.71636	13135.5	1104.59	0.399235	877.028	0.835487	0.379055	0.000869305	0.250307	360202	79.968	Fuping County	Weinan City
2017	32	0.3566	0.08484	75.37	14.4732	0.00163843	458520	1.91694	15239.6	1163.29	0.41137	903.556	0.837783	0.368754	0.000910412	0.249759	360364	79.535	Fuping County	Weinan City
2018	32	0.456187	0.083058	75.03	14.435	0.00112007	484139	2.21244	17343.7	1336.53	0.420635	887.658	0.799403	0.402717	0.000990976	0.249281	377887	82.48	Fuping County	Weinan City
2019	32	0.757722	0.204775	74.27	14.3825	0.00140855	501325	2.47697	19447.8	1481.19	0.420661	896.688	0.151073	0.403277	0.00117122	0.248861	380305	82.331	Fuping County	Weinan City
2020	32	0.865926	0.227641	64.25	13.9404	0.00166177	502214	3.58949	19585.8	1554.57	0.422354	1032.37	0.150082	0.422254	0.00135685	0.248488	382723	82.3627	Fuping County	Weinan City
2021	32	0.965232	0.249497	54.23	14.3004	0.00216688	491400	4.70202	19417.8	1728.38	0.424061	1218.2	0.149104	0.413978	0.00154398	0.248156	385141	82.3944	Fuping County	Weinan City
2012	33	0.377647	0.072264	45	8.08605	0.00164227	678458	22.3867	4787.56	1314.85	0.154627	1462.13	0.0744636	0.0204528	0.000440756	0.299548	121133	127.589	Shenmu City	Yulin City
2013	33	0.401803	0.088764	43	9.43732	0.00174477	633924	21.5242	5426.86	1212.23	0.225309	1050.12	0.0708646	0.0231847	0.000642232	0.305251	123983	95.596	Shenmu City	Yulin City
2014	33	0.487093	0.104467	44	9.59744	0.00109834	388726	22.5455	5349.76	1268.16	0.209882	1101.68	0.0689005	0.0222626	0.000825185	0.294644	124121	63.603	Shenmu City	Yulin City
2015	33	0.523244	0.111106	44	9.74809	0.00121556	365829	18.5775	5291.93	1070.61	0.124291	1860.34	0.0677571	0.0342769	0.000500886	0.297461	122762	31.61	Shenmu City	Yulin City
2016	33	0.537484	0.109567	44.31	9.2909	0.00169724	773612	2.41977	5349.57	1185.07	0.124086	1850.37	0.0645347	0.0267975	0.000292719	0.297626	125266	38.2996	Shenmu City	Yulin City
2017	33	0.592305	0.148248	47.12	9.68297	0.00161777	871336	23.5639	3727	1454.26	0.123857	1743.25	0.0604199	0.0325969	0.000316525	0.297771	129924	32.376	Shenmu City	Yulin City
2018	33	0.589366	0.167779	48.5	9.21597	0.00163353	1057700	26.7636	2104.43	1700.1	0.123651	1696.47	0.0305985	0.0316581	0.000121538	0.297899	248901	64.369	Shenmu City	Yulin City
2019	33	0.640223	0.179094	48.78	9.72722	0.00128882	1337864	27.9393	481.857	1785.04	0.122798	1698.44	0.0490417	0.0337469	0.00033796	0.298014	253621	67.644	Shenmu City	Yulin City
2020	33	0.710178	0.174904	57.3	9.4701	0.00105407	1246227	22.583	491.145	1694.83	0.121958	1455.86	0.0668109	0.0393296	0.00055142	0.298116	258341	67.061	Shenmu City	Yulin City
2021	33	0.388041	0.086071	65.82	10.0294	0.0010808	1336700	17.2266	4942.8	2420.65	0.121129	1276.09	0.192142	0.0174365	0.000416706	0.298209	263061	66.478	Shenmu City	Yulin City
2012	34	0.218247	0.031252	54.57	8.27353	0.00144163	314069	7.35916	5527.42	568.68	0.634872	792.652	0.0880652	0.0896587	0.000878511	0.277251	243070	43.945	Yuyang District	Yulin City
2013	34	0.249051	0.057256	55.41	9.61518	0.00160588	335598	8.32449	6189.8	653.991	0.516502	959.538	0.0972768	0.0857677	0.000808757	0.28047	237364	44.21	Yuyang District	Yulin City
2014	34	0.4322	0.105992	55.54	9.68426	0.000986223	405025	9.15682	612.961	721.069	0.433042	1141.79	0.0998252	0.0845573	0.000756919	0.28204	239639	44.691	Yuyang District	Yulin City
2015	34	0.427312	0.093918	57	9.82713	0.00116617	409384	9.52872	581.867	770.027	0.422035	1141.56	0.104512	0.0818439	0.000753047	0.274517	218894	44.696	Yuyang District	Yulin City
2016	34	0.392254	0.076072	58.48	9.4008	0.00144408	450187	9.51984	5941.52	789.338	0.431037	1089.43	0.0955543	0.0905182	0.000580757	0.27655	239738	44.773	Yuyang District	Yulin City
2017	34	0.454136	0.099072	66.2	9.69896	0.00150829	524548	1.55963	6406.26	990.316	0.355593	1166.57	0.0945742	0.073317	0.000505005	0.278318	242138	45.711	Yuyang District	Yulin City
2018	34	0.519484	0.121102	68.48	9.29324	0.00151263	639406	11.3547	6871	1102.06	0.333633	1201.96	0.0847716	0.0834864	0.000510266	0.27987	449443	78.22	Yuyang District	Yulin City
2019	34	0.56689	0.107429	68.87	9.73712	0.00123656	766658	13.6738	7335.74	1328.71	0.331872	1201.5	0.0834767	0.0761903	0.000519656	0.281242	451707	78.118	Yuyang District	Yulin City
2020	34	0.6088	0.108201	96.8	9.47624	0.000898383	826511	1.34112	751.888	1419.28	0.323166	877.851	0.0821947	0.0778303	0.000517793	0.282465	453971	76.993	Yuyang District	Yulin City
2021	34	0.643884	0.115431	124.73	10.213	0.00095284	886364	10.9915	7598.4	1509.85	0.314906	699.15	0.0809254	0.0792735	0.000516025	0.283561	456235	75.868	Yuyang District	Yulin City
2012	35	0.124196	0.019111	37	8.9049	0.00147736	198881	2.81676	3326.72	243.391	0.160946	2417.14	0.098159	0.19736	0.000268354	0.247325	152742	22.156	Hengshan District	Yulin City
2013	35	0.408067	0.0678	37	10.2849	0.0018816	213308	3.29324	3724.24	284.563	0.24162	1610.08	0.0755557	0.190744	0.000419653	0.247504	156732	30.41	Hengshan District	Yulin City
2014	35	0.421807	0.08864	37	10.0795	0.00122946	196305	3.67818	3582.85	317.819	0.23653	1644.73	0.0751924	0.18117	0.00046011	0.243949	158008	38.664	Hengshan District	Yulin City
2015	35	0.473526	0.089808	38	10.3556	0.00127131	264716	3.66526	3598.43	272.092	0.237451	1595.24	0.0762436	0.213449	0.000478398	0.273658	156000	46.918	Hengshan District	Yulin City
2016	35	0.496296	0.094751	37.9	10.025	0.00151092	234524	3.19683	3678.13	279.622	0.237436	1599.55	0.0720103	0.0922186	0.000280422	0.27349	167004	55.172	Hengshan District	Yulin City
2017	35	0.539739	0.127914	31.25	10.3097	0.00151077	285500	4.94272	3949.61	356.474	0.220066	2093.06	0.0691692	0.185673	0.000290484	0.273346	176943	63.426	Hengshan District	Yulin City
2018	35	0.695758	0.17852	31.35	10.0042	0.00144829	324262	6.42743	4221.09	437.203	0.176846	2596.27	0.0465862	0.222999	0.000331724	0.27322	266817	71.68	Hengshan District	Yulin City
2019	35	0.714387	0.161332	31.64	10.3193	0.00130197	361200	6.36757	4492.56	464.967	0.177016	2570.01	0.0467196	0.235666	0.000270553	0.273109	267297	72.3935	Hengshan District	Yulin City
2020	35	0.682817	0.144144	28.4	9.93352	0.00106971	430990	7.22274	4582.64	460.26	0.176866	2865.63	0.0468524	0.264324	0.000208886	0.273011	267777	73.107	Hengshan District	Yulin City
2021	35	0.706616	0.126956	25.16	10.7608	0.00106734	443600	8.07791	4618.74	631.133	0.176716	3237.4	0.0469848	0.211902	0.000147324	0.272923	268257	71.906	Hengshan District	Yulin City
2012	36	0.331128	0.059441	35	7.97807	0.00163522	282473	9.58571	276.475	623.133	0.22678	2329.2	0.0382695	0.100163	0.000551998	0.284862	229713	51.363	Jingbian County	Yulin City
2013	36	0.420833	0.094559	34	9.36654	0.00200002	313204	1.35765	2424.67	692.138	0.230651	2357.47	0.0366028	0.099645	0.000586371	0.296504	231758	51.675	Jingbian County	Yulin City
2014	36	0.509046	0.113485	34	8.85718	0.00142043	327688	1.74882	2532.39	717.748	0.230651	2357.47	0.0374419	0.0973655	0.000686179	0.28269	237461	51.863	Jingbian County	Yulin City
2015	36	0.433542	0.080187	35	9.16886	0.00132933	331043	7.624	2542.8	524.45	0.217006	2434.11	0.0399223	0.149877	0.000680799	0.27213	215168	49.713	Jingbian County	Yulin City
2016	36	0.458794	0.085729	35.6	9.04662	0.0013285	311727	6.88338	267.839	481.407	0.215596	2408.74	0.0510962	0.168585	0.000524775	0.273995	235810	49.44	Jingbian County	Yulin City
2017	36	0.605991	0.141023	37.73	9.25178	0.00156454	328200	8.54864	286.511	597.307	0.215511	2273.65	0.0655019	0.174286	0.000547881	0.275631	255321	53.448	Jingbian County	Yulin City
2018	36	0.624848	0.146774	38.2	8.96891	0.0014352	383500	7.75484	305.182	582.223	0.215473	2246.07	0.0368166	0.190142	0.000244755	0.277079	328656	69.374	Jingbian County	Yulin City
2019	36	0.740601	0.192432	38.41	9.18356	0.00140629	440129	1.14972	323.854	766.216	0.215388	2234.68	0.0380231	0.1531	0.000629121	0.278369	319516	69.343	Jingbian County	Yulin City
2020	36	0.815335	0.218211	38.9	8.70688	0.00119533	365296	9.349	3271.57	714.091	0.215302	2207.4	0.0393007	0.173521	0.00101318	0.279526	310376	68.363	Jingbian County	Yulin City
2021	36	0.329307	0.060026	39.39	9.61652	0.00123579	290463	17.5483	33.8155	884.478	0.215217	2180.81	0.0922333	0.0554939	0.000512212	0.280568	301236	67.383	Jingbian County	Yulin City
2012	37	0.348566	0.086189	34	7.77261	0.00137381	277248	8.55912	1192.44	420.535	0.159169	3945.94	0.106807	0.100775	0.000372684	0.273049	282210	110.226	Dingbian County	Yulin City
2013	37	0.359755	0.084837	34	9.12316	0.0015928	303420	9.12	1391.78	448.092	0.15601	4025.82	0.110624	0.104334	0.000409123	0.276224	293789	110.899	Dingbian County	Yulin City
2014	37	0.470013	0.111069	35	8.49677	0.00138729	327717	9.66829	1448.36	489.003	0.153712	3969.29	0.101128	0.0955179	0.000439086	0.276766	298472	111.142	Dingbian County	Yulin City
2015	37	0.419674	0.104086	35	8.79893	0.00126794	343155	7.36857	1460	372.298	0.1396	4370.51	0.110445	0.137727	0.000411851	0.274378	270551	110.857	Dingbian County	Yulin City
2016	37	0.478097	0.111428	35.21	8.84246	0.00108153	323574	6.53387	1499.97	332.413	0.132224	4586.82	0.0983286	0.157855	0.000284826	0.276257	298428	110.652	Dingbian County	Yulin City
2017	37	0.563872	0.124846	33.37	8.92475	0.00135971	395335	7.65118	1624.54	368.96	0.100479	6368.77	0.117145	0.185031	0.000249381	0.277901	292126	110.842	Dingbian County	Yulin City
2018	37	0.648248	0.153976	33.94	8.71257	0.00138186	413553	9.34838	1749.11	458.503	0.100008	6291.28	0.0912586	0.154032	0.000234164	0.279351	375044	165.68	Dingbian County	Yulin City
2019	37	0.683832	0.160644	34.21	8.75357	0.00131347	447296	9.28439	1873.68	458.987	0.100008	6241.63	0.0909871	0.159001	0.000280996	0.280639	374273	165.427	Dingbian County	Yulin City
2020	37	0.736161	0.178076	33.9	8.37262	0.0011208	386410	7.76283	193.262	380.289	0.100008	6298.7	0.0907144	0.198098	0.000327829	0.281792	373502	163.196	Dingbian County	Yulin City
2021	37	0.376176	0.077355	33.59	9.24545	0.00112742	483539	6.24127	1964.64	493.809	0.100008	6356.83	0.0396318	0.0429515	6.55658e-05	0.282829	372731	160.965	Dingbian County	Yulin City
2012	38	0.319249	0.051065	26	7.99456	0.00168542	290961	17.3277	2994.15	1395.23	0.113424	1598.35	0.0892254	0.019169	0.000770027	0.288333	68411	30.667	Fugu County	Yulin City
2013	38	0.3579	0.077782	25	9.37191	0.00179398	324728	17.4152	3443.25	1348.34	0.108959	1730.4	0.0930404	0.0212768	0.000739713	0.299611	65176	30.762	Fugu County	Yulin City
2014	38	0.447885	0.114004	25	9.49197	0.00118278	317826	17.4612	3435.52	1351.9	0.108952	1730.52	0.0901598	0.0231842	0.000739662	0.290609	67214	30.716	Fugu County	Yulin City
2015	38	0.353558	0.077444	25	9.60517	0.00128772	252244	15.354	3458.36	1188.48	0.108952	1730.52	0.171977	0.0261432	0.000785891	0.2767	32388	30.321	Fugu County	Yulin City
2016	38	0.280937	0.074223	24.78	9.23949	0.00185097	283489	15.8422	3543.36	1215.76	0.108952	1745.88	0.125019	0.0606763	0.000531632	0.276883	58391	29.961	Fugu County	Yulin City
2017	38	0.353992	0.080752	26.89	9.71876	0.00147927	364647	18.5987	2506.88	1517.12	0.108952	1608.89	0.11401	0.0241923	0.000531632	0.277045	60521	28.941	Fugu County	Yulin City
2018	38	0.460245	0.109826	27.15	9.27645	0.00163761	468115	19.8739	1470.41	1542.53	0.108952	1593.48	0.0843965	0.0288474	0.000554747	0.277188	69446	30.194	Fugu County	Yulin City
2019	38	0.553312	0.122649	27.28	9.67182	0.00131216	516258	22.6359	433.935	1929.1	0.108952	1585.89	0.0777648	0.0272912	0.000554747	0.277316	69453	29.206	Fugu County	Yulin City
2020	38	0.60759	0.135472	25.6	9.39423	0.00107738	428529	22.7659	442.528	1820.7	0.108952	1689.96	0.0711345	0.0311246	0.000554747	0.277432	69460	28.989	Fugu County	Yulin City
2021	38	0.706312	0.148295	23.92	9.85813	0.00118106	554238	22.8959	4458.99	2298.92	0.108952	1808.65	0.0645054	0.0263991	0.000554747	0.277536	69467	28.772	Fugu County	Yulin City
2012	39	0.212276	0.053314	26	9.19761	0.00161677	157239	1.22538	2742.47	157.023	0.127906	1663.96	0.259211	0.463773	0.000254259	0.230338	70730	24.562	Jia County	Yulin City
2013	39	0.32443	0.06642	27	10.6988	0.00192711	171363	1.35475	3228.35	180.187	0.179441	1142.15	0.0464828	0.425432	0.00038913	0.233518	72629	24.734	Jia County	Yulin City
2014	39	0.419571	0.091933	27	10.5732	0.00121379	176687	1.53593	3392.32	204.386	0.179406	1142.37	0.0533161	0.366096	0.000453897	0.236121	76731	24.908	Jia County	Yulin City
2015	39	0.411442	0.090843	27	10.8559	0.00146441	178702	1.27556	3583.22	169.739	0.179406	1142.37	0.0550775	0.513836	0.000518739	0.258197	75530	24.265	Jia County	Yulin City
2016	39	0.460575	0.11421	26.95	10.4385	0.0017303	206511	1.47689	3663.12	196.156	0.16474	1246.38	0.0455897	0.468786	0.000357249	0.257313	76662	25.685	Jia County	Yulin City
2017	39	0.627493	0.164441	17.83	10.795	0.00174523	234515	2.83287	3933.35	248.94	0.0940962	3298.26	0.0361293	0.573645	0.000221058	0.256566	87436	25.277	Jia County	Yulin City
2018	39	0.74877	0.166091	15.55	10.5093	0.00164867	264676	3.53174	4203.58	270.668	0.103618	3434.34	0.0161936	0.559186	0.000280878	0.255927	197980	57.266	Jia County	Yulin City
2019	39	0.768933	0.167772	15.08	10.96	0.00124651	301031	3.81893	4473.81	283.832	0.103616	3541.45	0.0163209	0.563377	0.000280873	0.255373	198396	57.426	Jia County	Yulin City
2020	39	0.888129	0.169452	11.4	10.4801	0.00132955	295237	5.55554	457.743	312.14	0.103614	4684.74	0.0164477	0.539677	0.000280867	0.254889	198812	56.963	Jia County	Yulin City
2021	39	0.445457	0.066463	7.72	11.0424	0.00124925	296331	7.29216	4613.48	353.622	0.103612	6918.01	0.00477844	0.0482523	0.000131069	0.254462	199228	56.5	Jia County	Yulin City
2012	40	0.105316	0.024351	8	10.0827	0.00159845	83721	1.72125	286.653	329.426	0.110022	1015	0.0537344	0.264975	0.000862069	0.229702	17754	5.497	Wubu County	Yulin City
2013	40	0.132902	0.033381	9	11.7369	0.00177481	102286	1.77667	3319.24	382.536	0.110117	901.444	0.0524497	0.244734	0.000862813	0.231785	18227	5.537	Wubu County	Yulin City
2014	40	0.240918	0.050882	9	11.3361	0.0014178	105906	1.97778	3339.69	425.837	0.11028	900.111	0.050861	0.21436	0.000864091	0.234507	18816	5.576	Wubu County	Yulin City
2015	40	0.256096	0.048786	8	11.8416	0.00138442	109127	2.95	3356.79	400.957	0.110321	1012.25	0.0518418	0.302476	0.000987898	0.257491	18460	5.991	Wubu County	Yulin City
2016	40	0.330914	0.076962	8.43	11.4634	0.00162376	112210	2.13167	3433.68	429.904	0.110403	959.905	0.0406107	0.298169	0.000494315	0.257145	22925	6.891	Wubu County	Yulin City
2017	40	0.493717	0.13956	6.45	11.77	0.00174947	151524	3.23729	2303.58	499.522	0.110444	1254.11	0.035185	0.437174	0.000494499	0.256851	25778	6.782	Wubu County	Yulin City
2018	40	0.630273	0.150176	6.46	11.6597	0.00123656	170072	3.6234	1173.48	546.895	0.110608	1250.31	0.0163253	0.43647	0.00160951	0.256599	55558	12.169	Wubu County	Yulin City
2019	40	0.635665	0.160802	6.49	12.0545	0.00123216	169019	4.14681	43.3845	628.804	0.110717	1243.3	0.0162894	0.420053	0.000619655	0.256381	55619	12.19	Wubu County	Yulin City
2020	40	0.695677	0.171428	5.5	11.307	0.00143188	166123	5.22364	4486.71	679.601	0.110827	1465.64	0.0162536	0.433156	0.000744325	0.25619	55680	12.088	Wubu County	Yulin City
2021	40	0.260119	0.065908	4.51	11.8172	0.0014593	167011	6.30046	4623.35	743.147	0.110937	1785.59	0.065015	0.576872	0.00149013	0.256021	55741	11.986	Wubu County	Yulin City
2012	41	0.463477	0.122573	23	9.23297	0.00148495	140089	1.74435	3861.58	331.023	0.128851	1158.57	0.061327	0.233432	0.000525387	0.244696	83438	26.406	Mizhi County	Yulin City
2013	41	0.133858	0.020778	22	10.742	0.0019104	150672	2.12	4324.67	384.818	0.123246	1266.32	0.0613571	0.216263	0.000610216	0.244032	85418	26.587	Mizhi County	Yulin City
2014	41	0.179215	0.027518	22	10.4614	0.00129051	160277	2.21182	421.798	401.485	0.123219	1266.59	0.0594573	0.199501	0.000645972	0.243165	88080	26.783	Mizhi County	Yulin City
2015	41	0.14735	0.029828	22	10.8197	0.00144474	181670	1.88773	473.34	342.657	0.123219	1266.59	0.0599707	0.286289	0.000645972	0.26501	87426	28.837	Mizhi County	Yulin City
2016	41	0.11963	0.034835	22.33	10.4497	0.0017939	191770	2.86946	411.374	369.967	0.123215	1247.92	0.0523259	0.27628	0.000502404	0.264813	100218	29.832	Mizhi County	Yulin City
2017	41	0.237717	0.063468	15.58	10.7544	0.0016713	228513	3.88729	1726.78	396.04	0.123197	1788.83	0.0492799	0.349148	0.000538213	0.264645	106311	29.513	Mizhi County	Yulin City
2018	41	0.29622	0.068613	14.54	10.5326	0.00146727	270493	3.96114	3042.18	475.083	0.123197	1916.78	0.0391122	0.334337	0.000609975	0.264501	133897	34.501	Mizhi County	Yulin City
2019	41	0.252535	0.064084	14.42	10.9141	0.00124907	240560	4.54724	4357.58	541.017	0.123197	1932.73	0.0394434	0.331595	0.000538213	0.264375	133964	35.308	Mizhi County	Yulin City
2020	41	0.247509	0.065608	14.2	10.4467	0.0012715	251884	4.42746	4435.96	518.729	0.123197	1962.68	0.0397744	0.38548	0.000466451	0.264264	134031	34.988	Mizhi County	Yulin City
2021	41	0.135962	0.020433	13.98	11.0953	0.00121517	262109	4.30769	4461.79	578.135	0.123197	1993.56	0.248266	0.202228	0.000358809	0.264166	134098	34.668	Mizhi County	Yulin City
2012	42	0.251389	0.051879	37	9.61453	0.00156907	192100	1.28727	3294.47	256.989	0.0766518	843.919	0.168926	0.333333	0.000480384	0.225987	87932	25.486	Suide County	Yulin City
2013	42	0.206796	0.043838	37	11.1886	0.00184039	235100	1.45818	3865.11	291.149	0.0573598	1127.76	0.170869	0.318576	0.000383445	0.225665	87412	25.661	Suide County	Yulin City
2014	42	0.201217	0.039774	36	10.7687	0.00143324	236000	1.525	3882.99	291.905	0.0573406	1159.47	0.167006	0.310024	0.000431231	0.230752	89895	25.854	Suide County	Yulin City
2015	42	0.222019	0.045548	36	11.2707	0.00141778	235266	1.63528	3916.7	317.701	0.0573406	1159.47	0.178077	0.31249	0.000455188	0.250425	83902	27.974	Suide County	Yulin City
2016	42	0.206289	0.047917	35.95	10.9062	0.00169623	262600	1.86787	423.221	362.385	0.0555545	1198.41	0.164419	0.288867	0.000348165	0.250609	90981	28.05	Suide County	Yulin City
2017	42	0.498844	0.114072	28.64	11.1728	0.00172529	323800	2.64992	1947.28	409.444	0.0495303	1687.26	0.155947	0.441193	0.000351799	0.250766	95077	27.757	Suide County	Yulin City
2018	42	0.721055	0.182757	28.75	11.0653	0.00128526	419500	3.26865	3471.34	507.144	0.0456818	1822.4	0.0611195	0.378892	0.001107	0.250902	243294	53.061	Suide County	Yulin City
2019	42	0.400382	0.081049	28.63	11.4252	0.00126939	372000	3.16271	4995.39	488.658	0.0456722	1830.42	0.0600216	0.416777	0.000324397	0.25102	243829	53.209	Suide County	Yulin City
2020	42	0.417318	0.08468	25.6	10.8152	0.00136675	388000	3.91219	5117.67	540.486	0.0456626	2047.5	0.0589285	0.398106	0.000343407	0.251124	244364	52.788	Suide County	Yulin City
2021	42	0.0929781	0.020431	22.57	11.3886	0.0013997	441600	4.66166	518.257	599.95	0.0456531	2322.86	0.020388	0.0774332	0.000209816	0.251216	244899	52.367	Suide County	Yulin City
2012	43	0.372532	0.092746	32	9.40081	0.0014577	158170	1.255	7494.84	196.863	0.0880669	870.594	0.129423	0.388212	0.00035895	0.230551	110985	31.763	Zizhou County	Yulin City
2013	43	0.0908521	0.026901	32	10.9464	0.00184084	180774	1.5125	8621.75	237.255	0.0823611	930.906	0.139965	0.349087	0.000369264	0.232516	102361	32.057	Zizhou County	Yulin City
2014	43	0.0617941	0.006989	30	10.5051	0.00140129	176603	1.742	8187.62	255.926	0.0804834	1016.13	0.135442	0.31872	0.000426453	0.236232	105898	32.251	Zizhou County	Yulin City
2015	43	0.131165	0.030874	30	10.8963	0.0013278	196628	1.46767	8185.19	215.622	0.0805997	1014.67	0.203464	0.445169	0.00042707	0.260714	70489	33.103	Zizhou County	Yulin City
2016	43	0.12987	0.03377	30.37	10.6082	0.00166864	238781	1.83438	894.976	272.821	0.080194	1007.38	0.143093	0.380921	0.000326861	0.259838	101312	33.785	Zizhou County	Yulin City
2017	43	0.287863	0.072916	16.87	10.8652	0.0016138	267191	3.72433	873.058	305.877	0.0805125	1806.34	0.140022	0.450043	0.000328159	0.259096	104062	33.382	Zizhou County	Yulin City
2018	43	0.31016	0.077609	16.39	10.7116	0.00132625	294350	3.88239	851.141	311.618	0.080105	1868.7	0.0787905	0.456327	0.000457098	0.25846	183804	54.749	Zizhou County	Yulin City
2019	43	0.24455	0.062854	16.05	10.9878	0.00131654	327500	3.73583	829.223	293.634	0.080105	1908.29	0.0812134	0.499745	0.000326499	0.257909	177914	52.92	Zizhou County	Yulin City
2020	43	0.282032	0.07909	13.9	10.4379	0.00130143	294870	4.88779	731.466	332.666	0.080105	2203.45	0.0838023	0.454763	0.000195899	0.257426	172024	52.444	Zizhou County	Yulin City
2021	43	0.289545	0.06003	11.75	11.2177	0.00129951	292560	6.03976	6275.93	378.452	0.080105	2606.64	0.055702	0.233759	0.000946846	0.257	166134	51.968	Zizhou County	Yulin City
2012	44	0.097256	0.009911	22	9.96379	0.00154044	145274	1.39455	2583.52	163.105	0.0481329	2052.5	0.0628771	0.64545	0.000310043	0.230701	71759	28.059	Qingjian County	Yulin City
2013	44	0.377228	0.078371	22	11.5802	0.00183831	180040	1.61182	2966.45	188.517	0.0810381	1219.09	0.0740812	0.556041	0.00059657	0.233575	72893	28.237	Qingjian County	Yulin City
2014	44	0.300285	0.054081	22	11.0465	0.00151221	161229	1.8	2969.35	209.463	0.080266	1230.82	0.0693167	0.48647	0.000627816	0.235668	75119	28.44	Qingjian County	Yulin City
2015	44	0.305165	0.054631	22	11.5698	0.00134152	175256	1.866	2984.81	218.235	0.080263	1230.86	0.0630321	0.506244	0.000664722	0.259232	84449	30.233	Qingjian County	Yulin City
2016	44	0.404815	0.09022	21.7	11.3165	0.00144798	184055	2.23523	324.9	233.44	0.0802038	1248.8	0.0673153	0.494209	0.000479722	0.259418	79135	31.328	Qingjian County	Yulin City
2017	44	0.577854	0.133795	12.4	11.5203	0.00163755	213050	4.11935	1443.17	271.558	0.0795579	2203.15	0.0639739	0.598471	0.000512464	0.259577	83284	30.764	Qingjian County	Yulin City
2018	44	0.290656	0.076596	12.47	11.517	0.00109872	244227	4.69687	2561.44	311.377	0.0794271	2194.39	0.0464719	0.561487	0.000182722	0.259715	109012	34.689	Qingjian County	Yulin City
2019	44	0.459332	0.124943	12.56	11.8168	0.00131655	290166	4.88933	3679.72	326.475	0.0794242	2178.74	0.0464113	0.573241	0.000511602	0.259836	109219	34.786	Qingjian County	Yulin City
2020	44	0.583478	0.132877	11.6	11.0694	0.00147169	272086	5.43819	3758.76	340.989	0.0794213	2359.14	0.046351	0.594758	0.000840459	0.259942	109426	34.509	Qingjian County	Yulin City
2021	44	0.395251	0.10239	10.64	11.6387	0.00161112	271303	5.98705	3793.54	376.486	0.0794184	2572.09	0.131356	0.202149	0.000328863	0.260038	109633	34.232	Qingjian County	Yulin City
2012	45	0.289557	0.061448	46.48	9.38033	0.00176221	182449	4.37414	947.834	571.738	0.280593	640.017	0.0808333	0.0908066	0.000504236	0.226737	90198	17.719	Baota District	Yan’an City
2013	45	0.310581	0.061734	46.92	10.9949	0.00215993	216626	4.61573	655.378	609.027	0.257229	691.603	0.0855651	0.0914688	0.000493066	0.230344	85023	17.786	Baota District	Yan’an City
2014	45	0.450413	0.105066	46.49	10.2639	0.00177556	281407	5.23532	777.194	684.449	0.257769	696.537	0.082565	0.0882304	0.000524983	0.233057	89917	17.853	Baota District	Yan’an City
2015	45	0.46804	0.111907	47.23	10.7044	0.00139849	249721	5.74169	871.234	757.593	0.25738	686.661	0.0837523	0.0751867	0.000555025	0.233874	88917	17.92	Baota District	Yan’an City
2016	45	0.284397	0.10781	47.88	10.6469	0.00162032	286122	5.32853	977.219	717.463	0.257944	675.856	0.0819122	0.0839321	0.000247219	0.234871	90011	17.987	Baota District	Yan’an City
2017	45	0.36088	0.122237	49.18	10.8487	0.00158287	300380	5.92172	1145.46	818.982	0.267526	634.425	0.0783123	0.0761292	0.000256402	0.235734	92859	18.054	Baota District	Yan’an City
2018	45	0.365275	0.122181	49.08	10.6668	0.00134245	344659	6.72323	1313.71	925.056	0.26344	645.579	0.0987197	0.0844356	0.000252485	0.236489	72326	18.121	Baota District	Yan’an City
2019	45	0.463776	0.13956	49.71	10.8959	0.00150886	373232	7.3266	1481.95	1023.37	0.265535	632.368	0.0925108	0.081513	0.000286305	0.237155	73613	18.188	Baota District	Yan’an City
2020	45	0.547259	0.156939	64.1	10.2591	0.00174396	330878	5.74945	1499.98	1036.39	0.264458	492.403	0.0865154	0.0856127	0.000316827	0.237746	74900	18.255	Baota District	Yan’an City
2021	45	0.520066	0.174318	78.49	10.9538	0.00214308	288524	4.17231	1474.95	1049.41	0.26339	403.758	0.0807224	0.0896106	0.000347102	0.238275	76187	18.322	Baota District	Yan’an City
2012	46	0.133461	0.040137	28	9.08027	0.00167629	158537	2.66286	6796.62	311.185	0.192348	1136.39	0.0974126	0.153093	0.000377133	0.218024	77259	25.802	Zichang City	Yan’an City
2013	46	0.192749	0.073024	27	10.6385	0.00195208	168409	3.78889	4628.34	346.953	0.201525	1124.81	0.102179	0.151048	0.000395127	0.221366	75025	25.412	Zichang City	Yan’an City
2014	46	0.349875	0.107273	27	10.0766	0.001502	157032	3.44444	5422.35	338.564	0.198492	1142	0.106198	0.158989	0.000486476	0.222766	77657	25.475	Zichang City	Yan’an City
2015	46	0.221399	0.077815	27	10.4739	0.00135364	182700	2.67481	688.762	301.419	0.195768	1157.89	0.263093	0.160132	0.0004798	0.239284	31848	25.611	Zichang City	Yan’an City
2016	46	0.375731	0.09898	26.97	10.2752	0.00160246	182400	2.77976	6479.14	312.896	0.194166	1168.74	0.109956	0.171142	0.000317249	0.240648	75785	25.625	Zichang City	Yan’an City
2017	46	0.570023	0.165518	22.1	10.5262	0.00165109	200066	4.39774	7283.28	405.634	0.193883	1428.37	0.0493257	0.132554	0.000348465	0.241834	78154	25.628	Zichang City	Yan’an City
2018	46	0.56667	0.217654	22.07	10.3593	0.00130056	236101	5.19147	8087.42	478.196	0.193368	1434.12	0.0890171	0.108501	0.000284351	0.242874	42475	10.881	Zichang City	Yan’an City
2019	46	0.64477	0.209423	21.94	10.5699	0.00148309	269800	5.62215	8891.55	463.543	0.188213	1482.13	0.0860672	0.114497	0.000369026	0.243795	43071	3.866	Zichang City	Yan’an City
2020	46	0.684159	0.185912	21.77	9.99816	0.00148235	237243	4.59412	8641.31	417.421	0.187314	1500.87	0.0831978	0.129998	0.000459081	0.244616	43667	18.613	Zichang City	Yan’an City
2021	46	0.853249	0.215249	21.6	10.8172	0.00150827	286061	3.5661	8139.24	566.23	0.186424	1519.91	0.0804058	0.0979342	0.000548279	0.245352	44263	33.36	Zichang City	Yan’an City
2012	47	0.199544	0.086853	20	10.058	0.0015401	131695	4.119	5193.89	415.222	0.0549756	1649.3	0.0938446	0.101799	0.000212211	0.217172	43263	16.966	Yanchuan County	Yan’an City
2013	47	0.212869	0.071648	20	11.683	0.00203262	139296	4.728	3584.28	476.613	0.0730101	1241.9	0.101363	0.103096	0.000281826	0.217471	40054	16.966	Yanchuan County	Yan’an City
2014	47	0.397763	0.118359	20	11.0721	0.00158627	181568	5.85	4257.32	517.942	0.0731072	1240.25	0.0943791	0.109115	0.000443459	0.226374	43018	16.966	Yanchuan County	Yan’an City
2015	47	0.327237	0.099829	19	11.5449	0.00132435	188311	3.77368	4814.28	354.861	0.0731072	1305.53	0.151509	0.168693	0.000483773	0.241683	26797	16.966	Yanchuan County	Yan’an City
2016	47	0.424265	0.127316	19.08	11.4067	0.00140619	191282	3.56977	5345.57	343.123	0.0751274	1265.09	0.127743	0.196259	0.000497141	0.244055	31767	16.966	Yanchuan County	Yan’an City
2017	47	0.44557	0.168829	17.18	11.6165	0.00153222	196104	4.69441	3857.42	406.297	0.0765675	1378.58	0.127376	0.169473	0.000548894	0.246121	31780	16.966	Yanchuan County	Yan’an City
2018	47	0.582512	0.171458	17.15	11.5944	0.00107426	265055	6.66798	2369.27	576.099	0.0794734	1330.5	0.132107	0.14334	0.000482076	0.247936	28916	5.574	Yanchuan County	Yan’an City
2019	47	0.626934	0.161373	17.01	11.8036	0.0013777	261503	5.8458	881.117	500.942	0.0770883	1382.95	0.176719	0.170201	0.000552627	0.249543	30359	10.935	Yanchuan County	Yan’an City
2020	47	0.687511	0.183169	13.97	11.0598	0.00166613	272134	7.28561	8162.16	512.746	0.0772557	1680.24	0.217282	0.171515	0.000639032	0.250976	31802	11.0601	Yanchuan County	Yan’an City
2021	47	0.766973	0.222138	10.93	11.6437	0.00190282	230157	8.72543	84.2367	599.358	0.077424	2142.91	0.254324	0.151206	0.000725813	0.252261	33245	11.1851	Yanchuan County	Yan’an City
2012	48	0.299978	0.101224	16	10.0715	0.00158589	103868	2.13625	448.137	143.961	0.150907	1460.69	0.122166	0.375923	0.000385093	0.218042	38374	10.03	Yanchang County	Yan’an City
2013	48	0.308893	0.062596	16	11.6894	0.00228863	117890	2.35437	2831.27	159.079	0.213619	1031.88	0.138238	0.376576	0.000545124	0.221717	35598	10.329	Yanchang County	Yan’an City
2014	48	0.471801	0.122032	15	10.9966	0.00175658	136330	2.73933	342.862	173.522	0.21336	1102	0.128902	0.373923	0.000665457	0.224777	40077	10.423	Yanchang County	Yan’an City
2015	48	0.420586	0.125395	16	11.5233	0.00128124	137408	2.6875	3837.19	181.588	0.212845	1035.62	0.192656	0.354235	0.00066385	0.242566	27832	10.654	Yanchang County	Yan’an City
2016	48	0.379474	0.134416	15.6	11.4429	0.00151719	153477	2.42436	4297.63	159.713	0.212845	1062.18	0.203165	0.390529	0.0006035	0.241873	27047	10.806	Yanchang County	Yan’an City
2017	48	0.431808	0.135798	12.86	11.6262	0.00147324	196096	3.57625	5078.95	194.215	0.237226	1156.07	0.191128	0.328058	0.000672631	0.24127	30027	10.821	Yanchang County	Yan’an City
2018	48	0.48699	0.127176	12.85	11.6002	0.00117084	211222	4.28397	5860.28	228.37	0.239677	1145.14	0.278896	0.332788	0.000883452	0.24074	21603	15.398	Yanchang County	Yan’an City
2019	48	0.526114	0.115674	12.79	11.8098	0.00136876	213262	4.1337	6641.6	223.269	0.240773	1145.27	0.276659	0.35083	0.000750956	0.24027	23191	5.76	Yanchang County	Yan’an City
2020	48	0.627853	0.104172	11.8	11.0717	0.00178422	212126	4.58136	671.537	228.294	0.240987	1240.25	0.274708	0.353317	0.000614964	0.239851	24779	5.85336	Yanchang County	Yan’an City
2021	48	0.739763	0.100882	10.81	11.5652	0.00231623	213126	5.02901	6583.94	289.248	0.241201	1352.64	0.272993	0.286919	0.000478731	0.239475	26367	5.94672	Yanchang County	Yan’an City
2012	49	0.161837	0.037171	19	8.50387	0.00182013	173037	5.56579	875.397	358.596	0.398861	768.895	0.0636011	0.107133	0.000479157	0.2317	68568	33.87	Ansai District	Yan’an City
2013	49	0.236566	0.068146	19	10.0658	0.00209764	197082	5.49526	583.828	353.747	0.214226	1431.58	0.0689786	0.119833	0.000330882	0.235512	65687		Ansai District	Yan’an City
2014	49	0.403377	0.127044	19	9.39682	0.0016164	209096	5.62153	685.419	360.936	0.214226	1431.58	0.0657574	0.123288	0.000404412	0.239994	71490		Ansai District	Yan’an City
2015	49	0.398873	0.117035	20	9.77767	0.00141606	243080	4.855	7487.11	329.264	0.214226	1360	0.0700652	0.135559	0.000404412	0.259382	69521		Ansai District	Yan’an City
2016	49	0.407476	0.132093	19.7	9.71761	0.00154189	208527	3.89188	873.995	259.898	0.213755	1383.76	0.0738684	0.192228	0.000330154	0.2608	68243		Ansai District	Yan’an City
2017	49	0.457945	0.153828	17.79	9.88274	0.00162247	234000	5.13297	4674.61	309.596	0.213755	1532.32	0.0760242	0.173113	0.000330154	0.262036	68544		Ansai District	Yan’an City
2018	49	0.531932	0.118241	17.78	9.60555	0.00140564	200021	6.33712	8475.22	363.581	0.156458	2094.66	0.0974571	0.205801	0.000268507	0.263122	53285		Ansai District	Yan’an City
2019	49	0.644308	0.175661	17.76	9.8637	0.0016428	230403	6.45445	12275.8	388.711	0.14699	2232.09	0.094311	0.202583	0.000252258	0.264083	53981		Ansai District	Yan’an City
2020	49	0.768951	0.177537	16.31	9.34856	0.00155836	260931	6.82166	1241.34	377.282	0.147064	2429.31	0.0912449	0.219113	0.000252385	0.264941	54677		Ansai District	Yan’an City
2021	49	0.896177	0.1845	14.86	10.1322	0.0016783	266937	7.18888	12181.5	494.13	0.147138	2665.01	0.088256	0.175234	0.000252512	0.265711	55373		Ansai District	Yan’an City
2012	50	0.267762	0.08394	16	8.05747	0.00178556	235356	1.99875	2542.27	463.838	0.161361	2473.88	0.0481449	0.0410473	0.000328432	0.227896	55146	17.574	Zhidan County	Yan’an City
2013	50	0.278404	0.076914	16	9.57137	0.00219999	265512	1.49313	1754.85	442.514	0.301273	1325	0.0516568	0.0477354	0.000660377	0.228213	51455	17.993	Zhidan County	Yan’an City
2014	50	0.412383	0.138408	16	8.85279	0.00168309	283425	1.41375	293.562	439.167	0.301316	1324.81	0.0499812	0.051267	0.000707647	0.230417	53180	18.2	Zhidan County	Yan’an City
2015	50	0.427458	0.109762	16	9.21072	0.0014253	275173	8.38375	2363.34	354.774	0.261579	1526.06	0.049404	0.0693947	0.000614326	0.252315	54024	18.74	Zhidan County	Yan’an City
2016	50	0.385001	0.113386	16.09	9.26205	0.00146875	218000	6.68676	2398.13	284.554	0.231858	1712.06	0.0497805	0.0946305	0.000326714	0.252833	56488	19.814	Zhidan County	Yan’an City
2017	50	0.495352	0.173021	14.71	9.36679	0.00163225	211442	9.47886	2797.27	350.527	0.211581	2052.14	0.0495113	0.0759471	0.000298142	0.253287	56573	19.82	Zhidan County	Yan’an City
2018	50	0.639987	0.190483	14.69	9.04626	0.00162637	190700	1.29666	3196.42	395.308	0.211315	2057.52	0.0447374	0.092837	0.000297767	0.253689	70612	18.553	Zhidan County	Yan’an City
2019	50	0.640015	0.154632	14.58	9.30379	0.0015709	273895	11.8385	3595.56	425.809	0.20353	2152.33	0.0563929	0.0866371	0.000286798	0.254046	71587	18.659	Zhidan County	Yan’an City
2020	50	0.698983	0.135194	15.51	8.78721	0.00159663	274968	9.13475	3624.92	373.404	0.203446	2024.11	0.0677352	0.0993093	0.000286679	0.254367	72562	18.765	Zhidan County	Yan’an City
2021	50	0.790131	0.139105	16.44	9.55745	0.00171277	269247	6.43101	3548.17	517.695	0.203362	1910.4	0.0787767	0.0720001	0.00028656	0.254657	73537	18.871	Zhidan County	Yan’an City
2012	51	0.173978	0.052916	14	7.67131	0.00162446	283187	14.3621	6315.17	530.668	0.25781	2244.29	0.061897	0.0352514	0.00050923	0.230366	58662	16.6455	Wuqi County	Yan’an City
2013	51	0.22013	0.051345	14	9.10656	0.00206526	333299	14.9786	434.782	553.444	0.330359	1751.43	0.0608015	0.0376958	0.000734095	0.233692	56742	16.794	Wuqi County	Yan’an City
2014	51	0.452741	0.151723	14	8.3971	0.00158935	371574	15.1786	5162.39	558.221	0.325566	1777.21	0.053326	0.0394932	0.000723444	0.237809	62146	16.9425	Wuqi County	Yan’an City
2015	51	0.410249	0.105648	14	8.68968	0.0014036	316301	1.33571	5771.29	370.731	0.323163	1790.43	0.054401	0.0621229	0.000757999	0.254559	61065	17.091	Wuqi County	Yan’an City
2016	51	0.425987	0.093884	14.49	8.79873	0.00123933	248158	7.49827	6241.67	286.751	0.319833	1747.9	0.045316	0.0777478	0.000513286	0.255626	62318	17.2395	Wuqi County	Yan’an City
2017	51	0.619239	0.174269	15.21	8.84291	0.00161341	243006	8.89893	7220.48	357.286	0.319921	1664.69	0.0406313	0.0638414	0.000552923	0.256563	69380	17.388	Wuqi County	Yan’an City
2018	51	0.712353	0.236938	15.2	8.62441	0.00161175	220005	9.91234	8199.3	397.75	0.315781	1687.63	0.0407219	0.0712376	0.000545766	0.257392	68931	17.5365	Wuqi County	Yan’an City
2019	51	0.768619	0.214464	15.26	8.81927	0.00141774	283982	11.7126	9178.12	471.822	0.307532	1726.08	0.0475712	0.0626305	0.000569476	0.258131	70610	17.685	Wuqi County	Yan’an City
2020	51	0.779542	0.237945	14.62	8.24583	0.00140631	331822	1.26897	9261.71	396.337	0.304412	1820.11	0.0541023	0.0776261	0.000601278	0.258793	72289	17.8335	Wuqi County	Yan’an City
2021	51	0.735609	0.164203	13.98	9.16068	0.00137653	332593	9.17463	972.928	555.668	0.301354	1922.75	0.0603369	0.0575555	0.00063244	0.259391	73968	17.982	Wuqi County	Yan’an City
2012	52	0.158969	0.05311	9	9.06838	0.00183302	76656	2.27778	2391.48	90.2289	0.200869	3016.67	0.0839887	0.317015	0.000294659	0.249667	41577	8.994	Ganquan County	Yan’an City
2013	52	0.209947	0.065495	9	10.6374	0.00211678	89377	2.36667	1665.35	93.75	0.568914	1065.11	0.0862439	0.344225	0.00083455	0.25066	39597	9.266	Ganquan County	Yan’an City
2014	52	0.355719	0.133319	9	9.84833	0.00190699	91394	2.49333	1844.75	98.7676	0.57058	1062	0.0785585	0.348676	0.00094162	0.252476	42427	9.409	Ganquan County	Yan’an City
2015	52	0.431941	0.125885	9	10.2421	0.00149689	100134	2.42222	1922.92	95.1585	0.892571	678.889	0.084941	0.366267	0.001473	0.263778	43489	9.659	Ganquan County	Yan’an City
2016	52	0.379421	0.125263	8.95	10.273	0.0016684	105458	2.29944	2264.66	90.581	0.908026	671.061	0.0744602	0.394184	0.0011655	0.26233	49973	9.514	Ganquan County	Yan’an City
2017	52	0.485234	0.143668	7.97	10.4199	0.0016559	112724	2.93614	2620.87	102.993	0.905463	755.709	0.0791437	0.356056	0.00116221	0.261073	47180	9.511	Ganquan County	Yan’an City
2018	52	0.568194	0.139049	7.95	10.0753	0.00160387	69260	3.35268	2977.07	117.314	0.906969	756.352	0.0841643	0.328981	0.00116414	0.259971	44627	7.445	Ganquan County	Yan’an City
2019	52	0.647301	0.124301	7.91	10.4031	0.00171063	139003	3.67598	3333.28	127.98	0.90712	760.051	0.0860614	0.313096	0.00133067	0.258998	45270	7.711	Ganquan County	Yan’an City
2020	52	0.700804	0.128255	7.69	9.88786	0.00180518	150715	3.75313	3332.28	126.936	0.908178	780.884	0.0879054	0.327297	0.00149875	0.258131	45913	7.977	Ganquan County	Yan’an City
2021	52	0.763261	0.151309	7.47	10.5124	0.00226168	139193	3.83028	3233.77	145.551	0.909237	802.945	0.0896984	0.295577	0.00166722	0.257355	46556	8.243	Ganquan County	Yan’an City
2012	53	0.163188	0.04309	22	9.84516	0.00164686	127912	9.68364	1134.98	1188.84	0.84353	272.318	0.566945	0.160954	0.00417293	0.284846	94413	12.622	Luochuan County	Yan’an City
2013	53	0.203699	0.036406	23	11.4679	0.00182135	152218	1.75391	778.785	1380.25	0.449727	488.565	0.597514	0.151968	0.00249177	0.284846	94540	12.884	Luochuan County	Yan’an City
2014	53	0.303783	0.061518	22	10.6274	0.00191398	140935	1.43	926.567	1280.36	0.474203	484.409	0.619125	0.174423	0.00281505	0.288253	99282	12.815	Luochuan County	Yan’an City
2015	53	0.299126	0.090753	22	11.0043	0.00133565	174179	8.44	134.657	1035.04	0.482627	475.955	0.583275	0.194171	0.00305606	0.277456	99886	12.856	Luochuan County	Yan’an City
2016	53	0.258513	0.086752	22.52	11.0606	0.00180664	103771	6.73757	115.888	846.708	0.491307	456.75	0.578419	0.254621	0.00243049	0.281022	105975	12.827	Luochuan County	Yan’an City
2017	53	0.337464	0.109777	23.06	11.1621	0.00148992	226749	6.49523	656.901	835.826	0.49848	439.636	0.570087	0.258567	0.00256461	0.284138	105112	12.754	Luochuan County	Yan’an City
2018	53	0.4111	0.135326	23.01	10.8627	0.00155546	198031	1.63482	1197.91	1361.53	0.511238	429.596	0.549857	0.13564	0.00263025	0.286883	106124	11.838	Luochuan County	Yan’an City
2019	53	0.56294	0.176219	22.82	11.1379	0.00145626	203864	1.6869	1738.93	1360.9	0.495693	446.757	0.493943	0.1772	0.00255027	0.289321	106324	11.938	Luochuan County	Yan’an City
2020	53	0.753	0.217112	20.17	10.6065	0.0017992	185779	11.9825	1761.43	1348.45	0.491881	509.37	0.438239	0.220717	0.00253066	0.2915	106524	12.038	Luochuan County	Yan’an City
2021	53	0.912543	0.258005	17.52	11.0551	0.00260586	188481	22.2782	1732.37	1557.19	0.488128	590.925	0.382744	0.227396	0.00251135	0.293459	106724	12.138	Luochuan County	Yan’an City
2012	54	0.260828	0.097918	16	9.2834	0.00189337	100397	1.8825	2886.82	72.0574	0.744541	652	0.298574	0.615784	0.00143788	0.271905	37304	6.254	Fu County	Yan’an City
2013	54	0.247298	0.063219	16	10.8643	0.00207656	115300	2.3625	1979.77	77.7273	0.788774	615.438	0.317132	0.641659	0.00162486	0.271898	35389	6.2475	Fu County	Yan’an City
2014	54	0.334928	0.092627	15	10.0368	0.00196202	114500	2.59667	2364.24	93.1818	0.787414	657.6	0.339817	0.583818	0.00182482	0.275388	35010	6.241	Fu County	Yan’an City
2015	54	0.363927	0.105586	16	10.3906	0.00150514	137700	2.55938	2661.48	97.9665	0.787414	616.5	0.327541	0.531971	0.00182482	0.279144	36426	6.312	Fu County	Yan’an City
2016	54	0.391018	0.12157	15.88	10.5014	0.00173866	144300	2.81549	2859.67	106.962	0.784947	623.111	0.324274	0.540476	0.00111167	0.279868	36426	6.448	Fu County	Yan’an City
2017	54	0.509485	0.177327	15.76	10.6015	0.00162522	155060	3.35723	3362.24	126.579	0.776783	634.454	0.304297	0.471274	0.00110011	0.280492	36609	6.286	Fu County	Yan’an City
2018	54	0.592379	0.193402	15.74	10.1845	0.00173094	170980	3.98284	3864.82	149.947	0.772534	638.755	0.330774	0.451667	0.00119355	0.281036	32950	5.647	Fu County	Yan’an City
2019	54	0.615892	0.167818	15.68	10.5178	0.00165866	180202	4.23279	4367.39	158.78	0.772534	641.199	0.341304	0.446727	0.00119355	0.281513	33290	5.733	Fu County	Yan’an City
2020	54	0.726521	0.142234	14.29	10.0459	0.00190106	180521	5.64416	4442.62	173.135	0.772534	703.569	0.351621	0.428199	0.00119355	0.281936	33630	5.819	Fu County	Yan’an City
2021	54	0.780608	0.11665	12.9	10.5523	0.00248806	177288	7.05553	4387.67	198.87	0.772534	779.38	0.361731	0.388905	0.00119355	0.282314	33970	5.905	Fu County	Yan’an City
2012	55	0.194795	0.053639	13	9.504	0.002076	150580	7.95385	2419.77	452.121	0.372673	773.385	0.19489	0.106614	0.00238711	0.268257	46616	10.354	Huangling County	Yan’an City
2013	55	0.210141	0.072219	13	11.1259	0.00199032	156013	8.34846	1662.95	474.552	0.419205	687.538	0.236754	0.112839	0.00290893	0.269313	45638	10.431	Huangling County	Yan’an City
2014	55	0.40817	0.110882	13	10.2448	0.00198873	127301	8.56615	1982.9	486.926	0.418877	688.077	0.23411	0.128127	0.00301845	0.271625	47939	10.345	Huangling County	Yan’an City
2015	55	0.363537	0.088006	13	10.5478	0.00160843	145943	6.63769	2242.29	376.913	0.383349	751.846	0.23054	0.15901	0.00276243	0.275798	50013	10.067	Huangling County	Yan’an City
2016	55	0.351318	0.088229	12.66	10.7936	0.00177955	155417	7.57316	2498.46	419.064	0.389526	759.795	0.230427	0.149678	0.00176734	0.27597	49456	10.002	Huangling County	Yan’an City
2017	55	0.34815	0.089082	13.23	10.815	0.00163749	214950	9.56689	3493.15	523.918	0.40546	698.488	0.252164	0.121739	0.00183963	0.276118	45752	9.894	Huangling County	Yan’an City
2018	55	0.544901	0.105553	13.19	10.3834	0.00174642	252735	11.5548	4487.83	666.409	0.417663	680.136	0.222635	0.10869	0.00200647	0.276248	53289	7.819	Huangling County	Yan’an City
2019	55	0.536227	0.088277	13.04	10.6714	0.00165045	259155	14.2585	5482.52	812.965	0.40454	710.276	0.224057	0.0930117	0.00194342	0.276363	53580	7.952	Huangling County	Yan’an City
2020	55	0.599136	0.084222	12.7	10.342	0.00195637	251748	13.3796	5551.62	739.005	0.410479	718.74	0.225465	0.106628	0.00197195	0.276465	53871	8.085	Huangling County	Yan’an City
2021	55	0.646059	0.131082	12.36	10.7372	0.00274409	307538	12.5006	5458.15	38.7407	0.416595	727.67	0.188804	0.722235	0.000555926	0.276556	54162	8.218	Huangling County	Yan’an City
2012	56	0.297915	0.11035	5	9.14906	0.00194868	73906	2.32	1468.77	36.9993	0.574829	2373	0.130003	0.680738	0.000589971	0.276875	77375	10.202	Huanglong County	Yan’an City
2013	56	0.437448	0.167632	5	10.8144	0.00212136	94321	2.222	11.5789	40.4588	0.573572	2378.2	0.128615	0.725977	0.000672778	0.277778	82121	11.004	Huanglong County	Yan’an City
2014	56	0.544408	0.203246	5	9.86921	0.00232114	99232	2.654	127.963	48.3248	0.566003	2410	0.124389	0.624258	0.0006639	0.278988	86149	11.197	Huanglong County	Yan’an City
2015	56	0.704966	0.252897	5	10.1758	0.00174887	100810	2.792	1362.82	50.8376	0.57074	2390	0.110813	0.609499	0.000585774	0.264662	95918	11.242	Huanglong County	Yan’an City
2016	56	0.638135	0.254124	5.02	10.3062	0.00227029	93137	3.71713	1362.66	56.1544	0.580158	2341.83	0.123901	0.569689	0.000595441	0.26538	90572	10.587	Huanglong County	Yan’an City
2017	56	0.368757	0.160462	5.02	10.4184	0.00190956	103664	3.39243	983.62	62.0175	0.587403	2312.95	0.156552	0.46323	0.000689002	0.265999	69900	9.477	Huanglong County	Yan’an City
2018	56	0.557457	0.179978	5	10.1321	0.00183976	119594	3.7338	604.576	67.9614	0.595143	2292	0.148391	0.537972	0.00069808	0.266537	73192	8.829	Huanglong County	Yan’an City
2019	56	0.430799	0.204216	4.92	10.4699	0.00180307	147445	3.96953	225.531	71.0961	0.618457	2241.46	0.146663	0.624574	0.000725426	0.267009	73495	8.959	Huanglong County	Yan’an City
2020	56	0.439957	0.174287	4.12	10.0301	0.00213673	149702	5.46951	249.792	82.0328	0.643671	2571.84	0.14495	0.63692	0.000755002	0.267426	73798	9.089	Huanglong County	Yan’an City
2021	56	0.4408	0.135255	3.32	10.4813	0.00302311	154439	6.9695	214.539	67.6374	0.671029	3061.45	0.128527	0.872643	0.00236128	0.267799	74101	9.219	Huanglong County	Yan’an City
2012	57	0.244928	0.050912	12	9.6499	0.00178795	100650	1.73167	229.643	70.8248	0.223283	987.833	0.404255	0.873879	0.00219335	0.247732	37083	6.786	Yichuan County	Yan’an City
2013	57	0.268888	0.056974	12	11.2824	0.00226985	113693	1.89333	1516.48	77.4369	0.224172	983.917	0.489348	0.862711	0.00228678	0.247243	36614	6.804	Yichuan County	Yan’an City
2014	57	0.270799	0.057967	12	10.4654	0.00202379	105068	2.11	188.366	86.2986	0.178224	1237.58	0.500013	0.781497	0.00188539	0.25069	37235	6.784	Yichuan County	Yan’an City
2015	57	0.291792	0.064051	12	10.9717	0.00135665	115119	2.32667	1985.26	95.0306	0.180435	1222.42	0.52164	0.725398	0.00115891	0.26149	36322	6.748	Yichuan County	Yan’an City
2016	57	0.0709796	0.027755	12.48	10.9995	0.00182232	138806	2.42949	217.712	103.199	0.180263	1176.52	0.548064	0.671913	0.00122591	0.261835	35047	6.77	Yichuan County	Yan’an City
2017	57	0.233839	0.067873	12.24	11.1279	0.00155274	148216	2.96244	1227.8	123.418	0.177364	1219.2	0.518045	0.694236	0.00120619	0.262136	35217	6.729	Yichuan County	Yan’an City
2018	57	0.384575	0.118759	12.23	11.0544	0.00134111	172589	3.89375	2237.89	128.601	0.177364	1220.2	0.710873	0.674917	0.00120619	0.2624	27251	4.185	Yichuan County	Yan’an City
2019	57	0.518129	0.169644	12.15	11.3426	0.00148261	167398	3.49823	3247.97	144.331	0.177435	1227.74	0.751411	0.609077	0.00120668	0.262633	27282	4.206	Yichuan County	Yan’an City
2020	57	0.6249	0.210113	11.21	10.5604	0.00197463	172239	4.65433	3283.42	155.117	0.177506	1330.15	0.791857	0.573904	0.00120716	0.262842	27313	4.227	Yichuan County	Yan’an City
2021	57	0.726972	0.248753	10.27	10.9717	0.00270584	172856	5.81042	3222.74	72.315	0.177578	1451.31	0.460357	0.436469	0.000603824	0.263029	27344	4.248	Yichuan County	Yan’an City
2012	58	0.0772456	0.015064	9	10.0156	0.00182409	82938	2.87111	4899.48	168.779	0.281189	2126	0.129189	0.400712	0.000574893	0.236395	97446	16.186	Yijun County	Tongchuan City
2013	58	0.138101	0.037863	9	11.6586	0.00192959	96939	3.28222	5492.62	192.946	0.281218	2125.78	0.126037	0.380274	0.000627221	0.239924	99645	15.96	Yijun County	Tongchuan City
2014	58	0.288853	0.069228	9.29	10.8364	0.00203687	96980	3.51615	585.847	212.476	0.278742	2077.72	0.128629	0.342158	0.000621697	0.242824	97536	15.962	Yijun County	Tongchuan City
2015	58	0.30771	0.089529	9	11.0747	0.00164935	106145	3.67889	5978.19	216.123	0.276606	2161.22	0.120547	0.352434	0.000462701	0.255797	100782	17.624	Yijun County	Tongchuan City
2016	58	0.382118	0.135152	9.25	11.4027	0.00172421	116769	4.11351	6239.15	248.368	0.260155	2235.78	0.120087	0.315201	0.000483536	0.256682	104358	18.1	Yijun County	Tongchuan City
2017	58	0.428364	0.128765	9.21	11.3297	0.00173969	143011	3.31846	6951.42	199.497	0.244702	2387.3	0.119538	0.358335	0.000500296	0.257446	106418	18.414	Yijun County	Tongchuan City
2018	58	0.553531	0.171821	9.01	11.0262	0.00159689	153094	3.6833	7663.69	216.622	0.234057	2551.28	0.0718098	0.346942	0.000522034	0.258111	159268	26.195	Yijun County	Tongchuan City
2019	58	0.653535	0.173324	8.64	11.2498	0.00168953	163818	4.17642	8375.97	244.451	0.214038	2909.37	0.0625898	0.334686	0.000517166	0.258696	162215	26.622	Yijun County	Tongchuan City
2020	58	0.755693	0.224193	7.2	10.8759	0.00199251	162353	5.93611	8781.35	289.566	0.197173	3789.86	0.0536988	0.29569	0.000513065	0.259214	165162	26.6237	Yijun County	Tongchuan City
2021	58	0.891086	0.275062	5.76	11.2367	0.00282971	147495	7.69581	9126.89	864.228	0.182772	5110.59	0.174571	0.125847	0.000679417	0.259676	168109	26.6253	Yijun County	Tongchuan City
2012	59	0.306968	0.040183	32	10.7369	0.0018231	186149	4.39719	342.115	911.925	0.197002	1019.5	0.358266	0.127816	0.00067435	0.239252	84401	29.311	Yaozhou District	Tongchuan City
2013	59	0.378272	0.051241	33	12.4437	0.00174124	209960	4.57	3775.93	934.201	0.198763	979.848	0.361732	0.1287	0.000711304	0.241821	83819	29.796	Yaozhou District	Tongchuan City
2014	59	0.51967	0.099812	33.01	11.5949	0.00193695	234651	4.35597	4534.48	880.483	0.199881	974.069	0.354732	0.138336	0.000746408	0.242801	90347	29.921	Yaozhou District	Tongchuan City
2015	59	0.501669	0.070054	34	11.6261	0.00167529	273227	3.75	5224.49	794.888	0.200593	942.353	0.35741	0.162049	0.000405743	0.250053	87955	29.798	Yaozhou District	Tongchuan City
2016	59	0.401553	0.095662	33.9	12.0884	0.00153163	274421	4.36195	5966.4	910.1	0.202011	938.496	0.370283	0.145756	0.000440044	0.250659	89248	30.3	Yaozhou District	Tongchuan City
2017	59	0.320655	0.105093	23.75	11.8907	0.00187493	330810	5.61638	4260.21	831.602	0.203103	1332.38	0.36398	0.183685	0.00041082	0.251179	89983	30.457	Yaozhou District	Tongchuan City
2018	59	0.307491	0.110213	23.61	11.6822	0.00162863	355292	7.48316	2554.02	1090.46	0.202808	1342.23	0.347172	0.128854	0.000410224	0.25163	79246	25.643	Yaozhou District	Tongchuan City
2019	59	0.430831	0.148678	22.74	11.7122	0.00177649	371942	8.34458	847.838	1183.02	0.226183	1249.56	0.304833	0.108425	0.000457505	0.252026	73063	25.432	Yaozhou District	Tongchuan City
2020	59	0.532226	0.187142	18.4	11.4749	0.00195613	370943	11.7437	84.7253	1347.16	0.255648	1366.3	0.254665	0.0861272	0.000517104	0.252375	66880	25.221	Yaozhou District	Tongchuan City
2021	59	0.637042	0.225607	14.06	11.7776	0.00277591	330615	15.1428	8693.59	397.52	0.29394	1555.12	0.0302651	0.0278696	0.000274411	0.252686	60697	25.01	Yaozhou District	Tongchuan City
2012	60	0.228409	0.03267	20.63	11.2619	0.00151022	86992	3.54678	3955.72	4511.1	0.536307	188.609	0.163113	0.0272653	0.00179902	0.266394	11256	3.79	Wangyi District	Tongchuan City
2013	60	0.324876	0.065866	20.57	13.0013	0.00147748	93785	3.99417	4432.18	5065.35	0.529906	191.444	0.180122	0.0262597	0.00177755	0.26881	10182	3.803	Wangyi District	Tongchuan City
2014	60	0.428263	0.134314	20	12.1658	0.00180054	96420	4.194	4655.33	5171.39	0.52471	198.85	0.161031	0.0265415	0.00176012	0.270852	9967	3.823	Wangyi District	Tongchuan City
2015	60	0.467087	0.119001	19.8	12.1627	0.0015521	97423	4.43131	483.453	5409.37	0.523263	201.414	0.144805	0.0264178	0.00100301	0.253611	10559	3.853	Wangyi District	Tongchuan City
2016	60	0.385836	0.128389	19.62	12.738	0.00129516	119617	5.18563	54.4463	6179.41	0.391294	271.814	0.149096	0.0238701	0.000562535	0.253793	10235	3.861	Wangyi District	Tongchuan City
2017	60	0.405987	0.176143	19.54	12.4497	0.00177549	147863	4.46469	2310.12	5378.55	0.391735	272.62	0.144456	0.0263056	0.000563169	0.253949	10363	3.857	Wangyi District	Tongchuan City
2018	60	0.437691	0.195781	17.45	12.2764	0.00138462	151219	4.86745	4565.79	5229.35	0.39373	303.725	0.155323	0.0303902	0.000566038	0.254085	9477	3.45	Wangyi District	Tongchuan City
2019	60	0.488339	0.214367	16.73	12.3169	0.0015917	156979	5.54393	6821.46	5718.25	0.394848	315.9	0.170175	0.030841	0.000567644	0.254204	8503	3.361	Wangyi District	Tongchuan City
2020	60	0.554499	0.232953	13.5	11.9275	0.0018531	163192	7.45778	7189.85	6207.15	0.395972	390.37	0.18887	0.0312207	0.00056926	0.254309	7529	3.272	Wangyi District	Tongchuan City
2021	60	0.612975	0.25154	10.27	12.2861	0.00254214	169405	9.37162	7512.13	4316.89	0.397102	511.685	1.30984	0.107002	0.00171265	0.254403	6555	3.183	Wangyi District	Tongchuan City
2012	61	0.293384	0.074844	22.62	10.8543	0.00165539	96232	3.63665	1546.47	1306.67	0.357107	394.518	0.169545	0.102165	0.00123263	0.243472	38450	9.991	Yintai District	Tongchuan City
2013	61	0.528288	0.149981	22.47	12.5531	0.00168319	96498	3.46862	172.616	1238.05	0.343816	412.506	0.193143	0.116559	0.00118675	0.248887	37361	10.205	Yintai District	Tongchuan City
2014	61	0.530146	0.155885	21.76	11.7209	0.00193305	101861	3.34467	1134.69	1048.86	0.346093	423.162	0.232329	0.139461	0.00130321	0.253217	36091	10.351	Yintai District	Tongchuan City
2015	61	0.480005	0.093889	21.2	11.7849	0.00166014	113027	2.98396	1139.82	1004.86	0.34553	435.047	0.220252	0.152831	0.000650548	0.256841	35691	10.395	Yintai District	Tongchuan City
2016	61	0.274344	0.108129	20.78	12.2997	0.00150163	142041	3.96246	119.434	1022.02	0.341458	449.134	0.224626	0.153715	0.00064288	0.259401	36198	10.407	Yintai District	Tongchuan City
2017	61	0.297268	0.128515	20.95	12.0788	0.00184893	151612	3.66348	592.749	1219.14	0.333699	455.847	0.215568	0.0920834	0.000732984	0.261608	36086	10.595	Yintai District	Tongchuan City
2018	61	0.37995	0.133646	18.95	11.8704	0.00149833	169218	3.25858	1066.06	980.875	0.337766	497.889	0.20199	0.124296	0.000741918	0.263528	39804	11.192	Yintai District	Tongchuan City
2019	61	0.326104	0.099105	18.12	11.9765	0.0016827	177557	3.48565	1539.38	1003.27	0.337016	521.854	0.215018	0.131146	0.000740271	0.265216	38606	10.574	Yintai District	Tongchuan City
2020	61	0.357057	0.120767	13.4	11.5525	0.0019837	191025	4.81866	164.341	1025.67	0.336269	707.239	0.228882	0.137697	0.00073863	0.26671	37408	9.956	Yintai District	Tongchuan City
2021	61	0.373414	0.1087	8.68	11.9367	0.00269323	204493	6.15166	1657.65	881.596	0.335526	1094.24	1.32074	0.565274	0.00368499	0.268042	36210	9.338	Yintai District	Tongchuan City
2012	62	0.181433	0.049629	30	11.9692	0.00131832	140294	2.43333	546.555	637.604	0.300956	952.567	0.4354	0.587953	0.00132974	0.229789	117880	28.238	Baishui County	Weinan City
2013	62	0.239197	0.059727	28	13.7219	0.00152581	152612	2.36786	5472.27	690.625	0.299625	1025.14	0.485216	0.600658	0.00139353	0.237203	110759	28.059	Baishui County	Weinan City
2014	62	0.339837	0.064146	29	12.8349	0.00178772	167935	2.12269	5648.24	641.042	0.299479	990.276	0.552867	0.673887	0.00142768	0.241408	105208	27.516	Baishui County	Weinan City
2015	62	0.370815	0.07284	29	12.982	0.0013644	188745	2.17138	5629.96	655.938	0.299302	990.862	0.551947	0.694234	0.00139203	0.257902	111623	27.874	Baishui County	Weinan City
2016	62	0.39973	0.069144	28.66	13.3864	0.00137457	207690	2.52237	572.515	752.396	0.3287	912.945	0.587742	0.623337	0.00122301	0.259943	109070	27.999	Baishui County	Weinan City
2017	62	0.456683	0.062864	28.4	13.2498	0.00162705	230500	2.72878	671.632	807.264	0.325934	929.12	0.630243	0.694924	0.00125062	0.261703	109004	28.224	Baishui County	Weinan City
2018	62	0.576348	0.072644	27.96	13.2251	0.00127771	252091	3.23938	770.749	864.271	0.329367	933.906	0.69055	0.686497	0.00118719	0.263237	102598	24.728	Baishui County	Weinan City
2019	62	0.644388	0.068033	27.59	13.282	0.00140221	258462	3.49879	869.866	860.37	0.330977	941.827	0.682903	0.739189	0.00111603	0.264586	102180	24.722	Baishui County	Weinan City
2020	62	0.722174	0.074418	22.38	12.8281	0.00170464	252678	4.18623	871.766	957.906	0.332602	1155.41	0.675193	0.708456	0.00104416	0.265782	101762	24.9527	Baishui County	Weinan City
2021	62	0.824416	0.077774	17.17	13.1648	0.00246941	219978	4.87367	8657.47	788.037	0.334244	1498.6	0.314286	0.403724	0.00112705	0.266849	101344	25.1833	Baishui County	Weinan City
2012	63	0.0750283	0.016208	40	12.2893	0.00123498	166968	2.7525	6231.37	740.5	0.456979	1137.6	0.185759	0.413633	0.000703235	0.211943	177655	43.71	Chengcheng County	Weinan City
2013	63	0.117075	0.03079	41	14.1385	0.00132028	183596	2.82439	5912.13	760.839	0.449055	1129.44	0.191485	0.432316	0.000755825	0.215531	175100	43.574	Chengcheng County	Weinan City
2014	63	0.191838	0.046742	40	13.162	0.00172376	200369	2.565	5995.82	733.809	0.443141	1173.12	0.21186	0.462619	0.000788492	0.219336	167304	43.397	Chengcheng County	Weinan City
2015	63	0.206607	0.053844	39	13.2113	0.00140032	236656	2.26667	5852.44	705.085	0.445705	1196.28	0.197731	0.509184	0.000857357	0.233605	178561	43.396	Chengcheng County	Weinan City
2016	63	0.259358	0.061217	39.34	13.5942	0.00136499	239836	2.17819	5781.32	764.407	0.443528	1191.76	0.203534	0.481382	0.000746523	0.234348	175553	43.337	Chengcheng County	Weinan City
2017	63	0.32434	0.075675	39.32	13.5168	0.00158637	289858	2.23413	6786.97	783.638	0.440624	1200.23	0.144152	0.578636	0.000805204	0.234992	172478	42.938	Chengcheng County	Weinan City
2018	63	0.552691	0.145528	37.91	13.514	0.00124387	309306	2.59885	7792.62	878.621	0.432073	1269.51	0.130958	0.573236	0.00209861	0.235556	181348	41.121	Chengcheng County	Weinan City
2019	63	0.696157	0.195104	37.31	13.6645	0.00132811	318836	2.77518	8798.27	923.657	0.433234	1286.46	0.1405	0.599654	0.00341681	0.236054	168719	41.061	Chengcheng County	Weinan City
2020	63	0.830822	0.232518	30.41	13.0523	0.00161184	305696	3.73972	896.551	1013.59	0.434402	1574.12	0.151586	0.59546	0.00474211	0.236496	156090	41.1613	Chengcheng County	Weinan City
2021	63	0.966233	0.273752	23.51	13.3914	0.00256993	295568	4.70426	8982.97	2078.61	0.435575	2030.63	0.121803	0.0993886	0.00058651	0.236893	143461	41.2615	Chengcheng County	Weinan City
2012	64	0.217657	0.050583	40	11.3636	0.0016034	211518	7.515	6573.52	1740.04	0.0411696	672.05	0.210729	0.0915802	0.00104159	0.263696	83268	23.47	Hancheng City	Weinan City
2013	64	0.275818	0.063163	40	13.2141	0.00177254	280945	7.57525	655.188	1869.28	0.0406286	681	0.226959	0.0913739	0.00110132	0.271505	77600	23.36	Hancheng City	Weinan City
2014	64	0.344091	0.086354	40	12.3418	0.00208733	307921	7.78225	853.858	1920.36	0.0437353	632.625	0.242368	0.0925128	0.00122505	0.274891	72790	22.95	Hancheng City	Weinan City
2015	64	0.426651	0.108074	40	12.5528	0.00158484	344626	8.95	8346.23	1976.43	0.0473565	584.25	0.249724	0.0954367	0.00119812	0.293556	72576	21.37	Hancheng City	Weinan City
2016	64	0.459699	0.103455	40.15	12.85	0.00184455	386603	8.69244	8373.16	2152.99	0.0447902	615.417	0.262918	0.0904817	0.00105225	0.29395	68721	21.29	Hancheng City	Weinan City
2017	64	0.498068	0.103388	40.06	12.8822	0.00161613	483984	9.21136	9840.22	2276.34	0.0450381	613.405	0.284055	0.114067	0.00101738	0.294289	65086	19.94	Hancheng City	Weinan City
2018	64	0.595646	0.09423	39.94	12.8185	0.0014472	552655	8.89669	11307.3	2170.61	0.0453426	611.117	0.371042	0.12979	0.000983284	0.294582	48539	14.29	Hancheng City	Weinan City
2019	64	0.661147	0.100037	39.46	13.1306	0.00150249	553084	8.57679	12774.4	2087.85	0.045943	610.466	0.365766	0.145506	0.000954793	0.294838	49250	14.25	Hancheng City	Weinan City
2020	64	0.732481	0.1037	38.31	12.425	0.00192676	540631	9.77632	1295.51	2310.42	0.0465596	620.465	0.360641	0.141041	0.000925536	0.295064	49961	14.4555	Hancheng City	Weinan City
2021	64	0.793712	0.107517	37.16	12.748	0.0029174	475529	10.9759	12834.7	535.719	0.047193	631.082	0.660088	0.445583	0.000426421	0.295265	50672	14.6609	Hancheng City	Weinan City
2012	65	0.259864	0.069146	45	12.8533	0.0011885	169800	13355.6	32375.7	352.749	0.929961	617.022	0.121378	0.457486	0.000972412	0.221456	220180	50.755	Heyang County	Weinan City
2013	65	0.231075	0.053998	46	14.7801	0.00117666	192000	1.475	32524.8	418.232	0.442274	1269.2	0.121488	0.457444	0.000513848	0.226787	207000	50.709	Heyang County	Weinan City
2014	65	0.248725	0.04683	46	13.8177	0.001686	211500	1.55196	33437.7	472.164	0.440426	1274.52	0.126203	0.465569	0.000528758	0.229636	197372	50.459	Heyang County	Weinan City
2015	65	0.345809	0.08022	45	13.7641	0.00148411	233900	1.67356	33304.7	496.799	0.442183	1297.67	0.120226	0.457724	0.000547992	0.243542	206254	49.596	Heyang County	Weinan City
2016	65	0.371963	0.090757	45.29	14.216	0.00134537	253000	1.73261	33260	524.078	0.441126	1292.45	0.121935	0.462948	0.000546681	0.245844	203091	50.098	Heyang County	Weinan City
2017	65	0.40019	0.096069	44.41	14.1655	0.00153285	285100	2.08174	37812.9	546.068	0.442722	1313.31	0.121031	0.404931	0.000514368	0.247839	204038	50.164	Heyang County	Weinan City
2018	65	0.555344	0.128158	44.32	14.1319	0.00120108	327600	2.19269	43377.7	643.354	0.4421	1317.82	0.112245	0.469926	0.00056501	0.249586	219724	50.604	Heyang County	Weinan City
2019	65	0.587327	0.123221	43.91	14.3602	0.00128657	353600	2.39071	50013.3	676.27	0.440787	1334.09	0.106841	0.485157	0.000580403	0.251127	229790	50.504	Heyang County	Weinan City
2020	65	0.685775	0.142761	36.07	13.76	0.00154115	346800	3.13192	50393	730.523	0.44213	1619.13	0.101995	0.497418	0.000599295	0.252497	239856	50.8029	Heyang County	Weinan City
2021	65	0.747579	0.158507	35.46	14.0212	0.00267554	345689	3.24679	49983.3	786.139	0.443482	1641.96	0.0975384	0.495978	0.000618302	0.253723	249922	51.1018	Heyang County	Weinan City
2012	66	0.241406	0.064949	29	9.51527	0.00196977	132368	3.5269	1372.12	564.771	0.160455	2001.59	0.22304	0.424964	0.000189505	0.237378	126735	20.973	Xunyi County	Xianyang City
2013	66	0.301998	0.081745	30	11.1604	0.00173351	142504	3.86733	144.948	640.641	0.335427	925.567	0.28119	0.419535	0.000432168	0.24513	118923	20.602	Xunyi County	Xianyang City
2014	66	0.274492	0.052321	29	10.2576	0.00193832	145102	3.61834	119.118	579.365	0.336505	954.414	0.312141	0.488208	0.000505817	0.249957	108028	20.216	Xunyi County	Xianyang City
2015	66	0.29804	0.073498	29	10.4501	0.00162516	153941	3.6769	1917.29	601.071	0.335608	956.966	0.285142	0.493765	0.000360334	0.256524	112523	20.14	Xunyi County	Xianyang City
2016	66	0.366631	0.117892	29.56	10.7616	0.00165151	188731	4.12788	1814.48	687.824	0.334836	941.001	0.276626	0.444389	0.000359505	0.258177	110004	20.704	Xunyi County	Xianyang City
2017	66	0.469663	0.167412	26.71	10.6196	0.00179519	203568	3.61646	5432.16	533.322	0.335198	1040.28	0.283879	0.497097	0.000359893	0.259593	105721	20.167	Xunyi County	Xianyang City
2018	66	0.398316	0.158826	26.79	10.3687	0.00178456	238014	3.29925	9049.85	488.056	0.335198	1037.18	0.273218	0.568725	0.000467862	0.260821	105319	19.673	Xunyi County	Xianyang City
2019	66	0.463517	0.16615	26.87	10.4433	0.00175902	243141	3.32595	12667.5	492.601	0.335198	1034.09	0.222095	0.588767	0.00057583	0.261894	123992	20.06	Xunyi County	Xianyang City
2020	66	0.59244	0.171451	21.19	10.3257	0.00195017	260770	4.99956	12319.4	584.925	0.335198	1311.28	0.184355	0.517133	0.000683798	0.262841	142665	20.447	Xunyi County	Xianyang City
2021	66	0.76619	0.176752	15.51	10.6569	0.00277918	252963	6.67317	11389.7	246.383	0.335198	1791.49	0.201193	0.468261	0.000431872	0.263683	161338	20.834	Xunyi County	Xianyang City
2012	67	0.141698	0.03622	19	10.9223	0.00168342	90846	2.76737	7813.4	927.337	0.642101	582	0.545536	0.443925	0.00117562	0.231191	62665	12.066	Changwu County	Xianyang City
2013	67	0.122421	0.030303	19	12.6855	0.0015745	110669	3.19	7854.2	1068.96	0.632661	590.684	0.53273	0.48213	0.00124744	0.236458	58921	12.144	Changwu County	Xianyang City
2014	67	0.339062	0.123942	19	11.8067	0.00184167	110419	3.62263	8929.76	1213.93	0.608637	614	0.590304	0.446698	0.00128579	0.240041	55175	12.016	Changwu County	Xianyang City
2015	67	0.350744	0.126589	19	12.1268	0.00138392	124968	3.84215	8787.73	1287.48	0.606453	616.211	0.567041	0.438	0.00119576	0.246459	58666	11.983	Changwu County	Xianyang City
2016	67	0.329439	0.090422	18.78	12.405	0.00150333	147557	5.17561	85.8995	1688.73	0.603003	626.997	0.611282	0.368724	0.00110403	0.247899	54793	12.215	Changwu County	Xianyang City
2017	67	0.437382	0.103196	17.16	12.0487	0.00164579	171679	5.85431	552.481	1768.66	0.600148	689.452	0.60541	0.306972	0.00101428	0.249134	56266	12.279	Changwu County	Xianyang City
2018	67	0.474712	0.100866	17.24	11.9236	0.00170597	196148	5.93684	1019.06	1800.09	0.596218	690.777	0.60549	0.335901	0.00142749	0.250204	55669	12.081	Changwu County	Xianyang City
2019	67	0.584068	0.134038	17.68	11.904	0.00160329	212613	5.68317	1485.64	1745.6	0.590663	679.921	0.614395	0.381745	0.00183013	0.25114	54281	12.124	Changwu County	Xianyang City
2020	67	0.717936	0.168074	14.84	11.6421	0.0021687	207342	7.97346	1456.53	2083.1	0.58521	817.588	0.623769	0.349525	0.00222534	0.251967	52893	12.167	Changwu County	Xianyang City
2021	67	0.876895	0.217182	12	11.9108	0.00249136	225500	10.2637	9928.47	613.908	0.579857	1020.42	0.470246	0.560556	0.00114332	0.252702	51505	12.21	Changwu County	Xianyang City
2012	68	0.281061	0.099794	21	11.2401	0.00166461	101489	1.96895	1345.35	464.904	0.709425	916.952	0.350823	0.607065	0.000882842	0.231164	84735	18.623	Yongshou County	Xianyang City
2013	68	0.226114	0.054557	21	12.9697	0.00162056	115710	2.13476	138.38	504.274	0.698649	931.095	0.375683	0.609242	0.000920575	0.237203	82000	19.134	Yongshou County	Xianyang City
2014	68	0.282213	0.104237	21	12.1384	0.00184919	117655	2.38952	13496.9	562.43	0.669576	971.524	0.378323	0.585022	0.000980296	0.240308	81018	18.939	Yongshou County	Xianyang City
2015	68	0.34056	0.103659	21	12.2486	0.00154484	123377	2.79952	13354.7	659.28	0.669477	971.667	0.344074	0.533489	0.000833129	0.246669	89068	18.915	Yongshou County	Xianyang City
2016	68	0.278353	0.065195	20.81	12.7418	0.00144884	137251	3.51321	12937.6	822.385	0.667286	983.758	0.349729	0.450308	0.000976944	0.248282	87605	19.271	Yongshou County	Xianyang City
2017	68	0.366261	0.067377	18.85	12.4203	0.00183446	164400	4.53187	13790.3	960.919	0.665142	1089.55	0.349416	0.41644	0.00102249	0.249665	86696	19.197	Yongshou County	Xianyang City
2018	68	0.454275	0.091648	18.93	12.0928	0.00181498	188681	4.45626	14642.9	948.898	0.664883	1085.37	0.35819	0.448452	0.00111944	0.250862	84687	19.136	Yongshou County	Xianyang City
2019	68	0.519043	0.107936	19.01	12.0722	0.00175702	196864	4.4515	15495.6	951.89	0.664592	1081.27	0.376665	0.473695	0.00121625	0.25191	80642	19.19	Yongshou County	Xianyang City
2020	68	0.647042	0.124224	16.02	12.0137	0.00207931	201763	5.94745	15393	1064.05	0.664301	1283.65	0.397091	0.447607	0.00131297	0.252835	76597	19.244	Yongshou County	Xianyang City
2021	68	0.735637	0.140511	13.03	12.253	0.00264274	190750	7.44339	14556.5	1531.83	0.66401	1578.89	0.392463	0.1853	0.000486074	0.253657	72552	19.298	Yongshou County	Xianyang City
2012	69	0.0729027	0.035893	36	10.6342	0.00169849	209539	4.59528	26421.1	1398.39	0.333448	848.639	0.172538	0.16746	0.000360054	0.237051	129983	27.89	Binzhou City	Xianyang City
2013	69	0.204666	0.052254	36	12.3819	0.00149969	231363	5.16917	26485.6	1575.7	0.326837	865.806	0.174374	0.160046	0.000417081	0.244158	118286	27.678	Binzhou City	Xianyang City
2014	69	0.388837	0.118768	37	11.4762	0.00184338	210943	4.59486	27816.3	1434.68	0.325646	845.486	0.186559	0.181136	0.000447527	0.24811	115331	27.466	Binzhou City	Xianyang City
2015	69	0.430446	0.126089	37	11.7621	0.00139646	224096	5.13243	26671.7	1594.76	0.324123	849.459	0.171658	0.168483	0.000445434	0.25424	125622	27.254	Binzhou City	Xianyang City
2016	69	0.466903	0.139549	36.56	12.0738	0.0014614	244665	5.843	26859.6	1804.22	0.322553	863.868	0.162618	0.158481	0.000474939	0.25515	123049	27.042	Binzhou City	Xianyang City
2017	69	0.595116	0.189016	32.99	11.7619	0.0016881	233126	6.58126	31759	1833.73	0.320805	962.564	0.158787	0.150411	0.000503858	0.255935	121458	26.83	Binzhou City	Xianyang City
2018	69	0.64108	0.211137	33.27	11.577	0.00168057	264896	6.94629	36658.4	1951.88	0.319047	959.723	0.16594	0.153496	0.000657689	0.256618	116741	26.618	Binzhou City	Xianyang City
2019	69	0.747735	0.226293	32.16	11.5463	0.00164062	277739	6.72864	41557.8	1825.53	0.317863	996.549	0.174071	0.177154	0.000811258	0.257218	111782	26.406	Binzhou City	Xianyang City
2020	69	0.835244	0.241449	30.02	11.301	0.00207838	259746	8.99928	43685.1	2281.74	0.316687	1071.55	0.182957	0.152162	0.000963691	0.257748	106823	26.461	Binzhou City	Xianyang City
2021	69	0.962513	0.256605	27.88	11.6005	0.00256294	281904	11.2699	4367.68	360.389	0.315519	1158.07	0.321222	0.883424	0.000588472	0.258222	101864	26.516	Binzhou City	Xianyang City
2012	70	0.120248	0.038643	20	10.9852	0.00160321	107593	2.5125	21265.2	523.438	0.300686	1271.6	0.227815	0.830784	0.000904372	0.245728	124294	17.24	Chunhua County	Xianyang City
2013	70	0.192426	0.047707	20	12.6978	0.00158323	112882	2.677	21358.7	545.214	0.293733	1301.7	0.266202	0.852936	0.000921871	0.252037	115544	23.553	Chunhua County	Xianyang City
2014	70	0.255989	0.071061	19	11.8668	0.00176009	115757	3.2	2263.88	584.318	0.279804	1438.42	0.278909	0.801844	0.000914746	0.255279	110000	23.24	Chunhua County	Xianyang City
2015	70	0.335193	0.100318	20	11.9546	0.00144849	136112	3.2455	2256.58	660.326	0.265947	1437.7	0.243809	0.739619	0.000521667	0.261899	118043	23.148	Chunhua County	Xianyang City
2016	70	0.431606	0.162098	19.7	12.4285	0.00137114	161053	3.79594	2276.95	760.732	0.265929	1459.7	0.214867	0.677493	0.00052163	0.254996	115709	23.679	Chunhua County	Xianyang City
2017	70	0.563582	0.224376	19.7	12.0952	0.00185922	175098	3.86193	10623.5	773.957	0.265873	1460	0.198377	0.597787	0.00055629	0.24942	113476	23.637	Chunhua County	Xianyang City
2018	70	0.620478	0.235613	19.78	11.9338	0.00156397	203973	3.91911	18970	788.606	0.266727	1449.44	0.190225	0.628502	0.000383676	0.244822	112614	23.468	Chunhua County	Xianyang City
2019	70	0.674499	0.284915	19.81	11.8576	0.00170797	210000	4.14182	27316.5	834.354	0.266466	1448.66	0.186663	0.633569	0.000209074	0.240966	108929	23.657	Chunhua County	Xianyang City
2020	70	0.789772	0.339653	14.18	11.7322	0.00183579	210454	6.39915	27629.5	923.093	0.266207	2025.81	0.182851	0.60839	3.48117e-05	0.237685	105244	23.846	Chunhua County	Xianyang City
2021	70	0.889222	0.365421	8.55	11.9707	0.00254128	224792	8.65649	26613	418.616	0.265947	3363.04	0.228409	0.232007	0.000208667	0.23486	101559	24.035	Chunhua County	Xianyang City
2012	71	0.122421	0.019757	9	10.3468	0.00187202	72355	5.62111	12455.7	296.89	0.176778	3281.11	0.372985	0.202825	0.000237047	0.239905	63284	20.897	Linyou County	Baoji City
2013	71	0.179518	0.044425	9	12.0653	0.0017415	76031	6.19444	11384	327.171	0.172559	3361.33	0.246099	0.192935	0.000264445	0.242513	60236	20.999	Linyou County	Baoji City
2014	71	0.378219	0.092134	9	11.2171	0.00198306	90789	7.16444	11444.4	378.404	0.173748	3338.33	0.229804	0.172788	0.000266267	0.244485	66326	21.37	Linyou County	Baoji City
2015	71	0.389782	0.074046	9	11.4315	0.00168664	95341	7.91111	11572.9	417.312	0.173679	3339.67	0.203105	0.16543	0.000166351	0.230868	72780	22.281	Linyou County	Baoji City
2016	71	0.403423	0.107207	8.74	11.7864	0.00162613	101202	12.1899	11772.9	625.235	0.173679	3439.02	0.188205	0.113567	0.000166351	0.232188	78558	22.708	Linyou County	Baoji City
2017	71	0.498707	0.129222	9.23	11.4866	0.00187861	117500	11.8873	13165.1	643.897	0.176682	3201.08	0.200577	0.0993511	0.000169228	0.233328	73787	22.485	Linyou County	Baoji City
2018	71	0.472286	0.104726	9.21	11.2249	0.00188309	133800	15.2672	14557.2	825.176	0.177174	3199.13	0.200903	0.0933397	0.000407277	0.234323	73523	22.065	Linyou County	Baoji City
2019	71	0.640289	0.160937	9.23	11.1692	0.0018887	145246	13.896	15949.3	752.7	0.178745	3164.14	0.198188	0.119665	0.000650574	0.235198	74384	22.457	Linyou County	Baoji City
2020	71	0.777451	0.198952	7.33	10.9647	0.00234916	150800	24.422	16112.4	1050.47	0.180345	3948.98	0.195535	0.098167	0.000898224	0.235974	75245	22.849	Linyou County	Baoji City
2021	71	0.954616	0.231813	5.43	11.2773	0.00273176	151300	34.948	16226.6	650.235	0.181973	5283.06	0.0675899	0.088537	0.00034859	0.236668	76106	23.241	Linyou County	Baoji City
2012	72	0.250242	0.053175	10	8.54839	0.00307841	91572	13.21	9684.27	408.566	0.309534	971.4	0.175071	0.0853805	0.00113239	0.247494	28714	6.336	Feng County	Baoji City
2013	72	0.27312	0.066363	10	10.0599	0.00322078	80489	14.561	8973.94	456.887	0.311749	964.5	0.232917	0.0814195	0.00114049	0.254845	22025	5.912	Feng County	Baoji City
2014	72	0.371184	0.078902	10	9.254	0.00278024	82366	14.845	989.788	465.799	0.312429	962.4	0.2298	0.0829808	0.00124688	0.259639	22389	5.982	Feng County	Baoji City
2015	72	0.391854	0.097423	10	9.70492	0.00286693	119451	17.74	914.243	535.739	0.312202	963.1	0.229555	0.0754153	0.000622988	0.251697	23637	6.106	Feng County	Baoji City
2016	72	0.40985	0.085989	9.54	9.69318	0.00248141	117177	18.8785	9238.39	565.108	0.312559	1008.39	0.233571	0.0737679	0.000623701	0.25257	23282	6.118	Feng County	Baoji City
2017	72	0.50445	0.104636	10.75	9.59008	0.00295506	124808	12.4447	10407.4	419.768	0.3137	891.628	0.229696	0.0955965	0.000625978	0.253328	23000	5.995	Feng County	Baoji City
2018	72	0.515253	0.125488	10.73	9.27021	0.00301292	131660	7.23764	11576.4	243.677	0.318552	879.683	0.266241	0.192855	0.000529717	0.253992	23828	6.162	Feng County	Baoji City
2019	72	0.526101	0.120588	10.71	9.33431	0.00335528	140269	7.45542	12745.4	250.541	0.320967	874.697	0.309522	0.214976	0.000426985	0.254578	23924	6.072	Feng County	Baoji City
2020	72	0.647045	0.147089	7.92	9.02772	0.00380315	170742	11.5525	12878.4	287.09	0.323418	1173.86	0.352456	0.211524	0.000322685	0.2551	24020	5.982	Feng County	Baoji City
2021	72	0.718989	0.157261	5.13	9.47171	0.00452028	171647	15.6496	12972.5	43.2695	0.325907	1798.44	0.18751	0.551204	0.000650336	0.255567	24116	5.892	Feng County	Baoji City
2012	73	0.118566	0.016057	5	7.02104	0.00372958	59973	3.166	117.357	58.6731	0.0818916	1302.6	0.585186	0.539267	0.00107477	0.241921	7331	2.148	Taibai County	Baoji City
2013	73	0.219222	0.055881	5	8.46079	0.00340219	68601	3.422	1789.58	63.4173	0.0822832	1296.4	0.688226	0.533068	0.00107991	0.244874	6370	2.219	Taibai County	Baoji City
2014	73	0.246505	0.062943	5	7.58222	0.00373426	73927	3.92	1899.88	72.6464	0.0825635	1292	0.655738	0.505536	0.00123839	0.249205	6405	2.164	Taibai County	Baoji City
2015	73	0.431024	0.091115	5	8.10761	0.00346332	93310	4.182	1126.59	77.5019	0.0823722	1295	0.554004	0.492353	0.000926641	0.236846	7592	2.188	Taibai County	Baoji City
2016	73	0.385048	0.107802	4.9	8.03976	0.00318742	97379	4.58163	11197.6	75.6402	0.0820806	1326.12	0.585637	0.504659	0.000923361	0.237854	7380	2.111	Taibai County	Baoji City
2017	73	0.422394	0.116038	5.2	7.98012	0.00343823	96029	5.32696	12856	102.653	0.0824359	1244.23	0.598668	0.413685	0.000927357	0.238723	7059	2.051	Taibai County	Baoji City
2018	73	0.526267	0.127579	5.18	7.55208	0.00418314	113563	5.84149	14514.5	112.153	0.0823722	1250	0.626395	0.42174	0.000926641	0.239479	6721	1.973	Taibai County	Baoji City
2019	73	0.619142	0.152338	5.15	7.66931	0.00391411	103118	7.27524	16172.9	138.871	0.0824996	1255.34	0.620782	0.375407	0.000928074	0.240143	6756	1.923	Taibai County	Baoji City
2020	73	0.763127	0.168703	3.96	7.50382	0.00381629	113747	11.5179	16224.7	168.818	0.0826274	1630.05	0.615226	0.337444	0.000929512	0.24073	6791	1.92534	Taibai County	Baoji City
2021	73	0.846948	0.184776	2.77	8.01397	0.00511705	115186	15.7606	16225.4	223.239	0.0827556	2326.71	0.509815	0.218092	0.00356866	0.241254	6826	1.92769	Taibai County	Baoji City
2012	74	0.199964	0.034176	20	11.1197	0.00280116	120616	3.2935	7445.59	232.674	0.354726	503.7	0.0780588	0.221612	0.00248164	0.220997	46939	20.267	Lueyang County	Hanzhong City
2013	74	0.246167	0.060718	19	12.534	0.00293219	130816	3.32579	6435.85	223.207	0.354797	530.105	0.0766221	0.24643	0.00248213	0.225068	47532	20.294	Lueyang County	Hanzhong City
2014	74	0.265467	0.054352	19	11.9116	0.00272108	131970	2.65579	6519.97	178.241	0.355715	528.737	0.0778879	0.3222	0.00248855	0.227724	47119	20.243	Lueyang County	Hanzhong City
2015	74	0.345679	0.091501	19	12.294	0.00282542	140726	2.94422	6524.26	197.598	0.355715	528.737	0.0749045	0.309435	0.00209038	0.256146	48168	20.314	Lueyang County	Hanzhong City
2016	74	0.369529	0.089791	18.53	12.4862	0.00229658	181022	3.64492	6556.63	238.573	0.355715	542.148	0.0738729	0.262074	0.00218993	0.256324	48421	20.169	Lueyang County	Hanzhong City
2017	74	0.486976	0.11277	20.03	12.3248	0.0027366	192519	3.6122	4403.73	255.558	0.355715	501.548	0.0691186	0.206457	0.00218993	0.256477	49104	20.1676	Lueyang County	Hanzhong City
2018	74	0.42935	0.102578	20	12.1019	0.00290801	222919	3.55828	2250.84	251.379	0.355715	502.3	0.0570998	0.233813	0.00218993	0.256609	43783	17.2714	Lueyang County	Hanzhong City
2019	74	0.570997	0.143755	20	11.9762	0.00300554	298695	3.1915	97.9395	225.468	0.35575	502.25	0.0359896	0.287357	0.00219014	0.256725	44624	17.275	Lueyang County	Hanzhong City
2020	74	0.7053	0.178036	14.4	11.7717	0.00372668	265986	4.84278	987.384	246.203	0.355786	697.5	0.0156604	0.287584	0.00219036	0.256827	45465	17.3523	Lueyang County	Hanzhong City
2021	74	0.857299	0.210161	8.8	11.9058	0.00416138	248707	6.49406	9186.83	171.318	0.355821	1141.25	0.254546	0.52521	0.00139401	0.256918	46306	17.4296	Lueyang County	Hanzhong City
2012	75	0.111565	0.015818	33	11.6533	0.00351994	157816	1.69242	3528.74	171.319	0.156826	644.121	0.14484	0.508258	0.000705683	0.223266	82208	30.898	Ningqiang County	Hanzhong City
2013	75	0.193232	0.046516	33	12.9366	0.00355383	151795	1.87667	349.148	189.969	0.156804	644.212	0.142814	0.486948	0.000799661	0.225505	83255	30.938	Ningqiang County	Hanzhong City
2014	75	0.325309	0.083444	33	12.2695	0.00343671	169701	1.94333	38.4519	196.687	0.156775	644.333	0.143939	0.491854	0.000846541	0.227857	82549	30.818	Ningqiang County	Hanzhong City
2015	75	0.425445	0.131126	33	12.7753	0.00316055	186927	2.16788	381.872	219.448	0.156745	644.455	0.119226	0.471842	0.000893403	0.254752	85233	30.84	Ningqiang County	Hanzhong City
2016	75	0.63311	0.158141	32.66	12.9055	0.00265309	200081	2.55525	399.818	255.521	0.156878	650.612	0.119151	0.412325	0.000941221	0.254651	85656	30.784	Ningqiang County	Hanzhong City
2017	75	0.769439	0.194867	30.91	12.7148	0.0030204	227177	2.88855	1691.08	273.151	0.156532	688.968	0.117185	0.323196	0.000986101	0.254565	87409	30.8464	Ningqiang County	Hanzhong City
2018	75	0.582016	0.135799	30.88	12.4884	0.00347467	263861	3.23873	2982.33	306.784	0.157508	685.363	0.134758	0.319046	0.000992251	0.25449	76834	27.1021	Ningqiang County	Hanzhong City
2019	75	0.668915	0.169827	30.89	12.3729	0.00337119	304326	3.45219	4273.59	327.111	0.157441	685.432	0.133863	0.328558	0.000991829	0.254425	78177	27.144	Ningqiang County	Hanzhong City
2020	75	0.768423	0.19304	25.64	12.2692	0.00440394	278542	4.8749	439.295	383.412	0.157374	826.131	0.132998	0.305343	0.000991408	0.254368	79520	27.2225	Ningqiang County	Hanzhong City
2021	75	0.8588	0.198098	20.39	12.4493	0.0045404	252758	6.2976	4353.89	14.816	0.157307	1039.28	0.0066285	0.377888	9.43797e-05	0.254317	80863	27.3009	Ningqiang County	Hanzhong City
2012	76	0.07267	0.006565	3	9.41398	0.00350773	46501	1.93	8292.57	45.2697	0.149125	611	0.0609357	0.351969	0.00218221	0.22445	8550	2.803	Foping County	Hanzhong City
2013	76	0.211185	0.053999	3	10.9097	0.00318947	53051	2.21667	7159.69	51.9937	0.149125	611	0.0647956	0.327744	0.00218221	0.227403	8658	2.804	Foping County	Hanzhong City
2014	76	0.301223	0.076712	3	10.1111	0.00337359	55700	2.44	7246.8	57.2322	0.146097	623.667	0.07167	0.316052	0.00213789	0.229462	8581	2.794	Foping County	Hanzhong City
2015	76	0.424575	0.097401	3	10.4485	0.00337999	66274	2.85333	7246.54	66.9273	0.145166	627.667	0.0665343	0.285853	0.0015932	0.256656	9063	2.801	Foping County	Hanzhong City
2016	76	0.446343	0.089085	3.3	10.5452	0.00295981	76669	2.9697	7312.62	76.6224	0.147436	561.818	0.0669304	0.256551	0.00161812	0.25843	9099	2.795	Foping County	Hanzhong City
2017	76	0.526379	0.101224	3.02	10.3516	0.00358053	80655	3.61132	5286.86	85.2432	0.147835	612.252	0.0651986	0.278475	0.0016225	0.259954	9264	2.80335	Foping County	Hanzhong City
2018	76	0.642303	0.114299	3.02	9.97183	0.00343542	80018	3.82318	3261.1	89.7318	0.147357	614.238	0.0684705	0.291573	0.00161725	0.261279	9055	2.63608	Foping County	Hanzhong City
2019	76	0.709683	0.119009	3.02	10.0334	0.00422469	79661	3.93425	1235.35	93.7751	0.147516	613.576	0.0692358	0.307753	0.001619	0.262441	9186	2.639	Foping County	Hanzhong City
2020	76	0.785536	0.131933	2.66	9.91317	0.00398737	93233	4.96923	1334.96	103.001	0.147675	695.865	0.0699796	0.303957	0.00162075	0.263469	9317	2.66681	Foping County	Hanzhong City
2021	76	0.849216	0.147201	2.3	10.3524	0.00555712	91759	6.0042	1457.5	69.2976	0.147835	803.913	0.0877434	0.482563	0.00108167	0.264383	9448	2.69463	Foping County	Hanzhong City
2012	77	0.0583215	0.002548	4	9.64703	0.00365964	53101	2.5175	18.9699	54.315	0.354306	771.5	0.0705652	0.469285	0.000972132	0.224047	11748	3.191	Liuba County	Hanzhong City
2013	77	0.165218	0.043618	4	11.1257	0.00380744	53291	2.855	934.246	61.5965	0.354306	771.5	0.0696814	0.445324	0.000972132	0.226121	11897	3.191	Liuba County	Hanzhong City
2014	77	0.267411	0.061045	4	10.3499	0.00323613	61465	3.1925	94.1414	64.9873	0.356617	766.5	0.0707382	0.413038	0.00130463	0.229574	11691	3.18	Liuba County	Hanzhong City
2015	77	0.379521	0.091445	4	10.7949	0.00320853	61458	3.5275	939.415	71.8066	0.3572	765.25	0.0666004	0.396981	0.00130676	0.256423	12072	3.182	Liuba County	Hanzhong City
2016	77	0.432896	0.088231	4.25	10.7983	0.00294223	76000	3.69176	966.164	79.8473	0.349214	736.706	0.066375	0.368311	0.00127755	0.25747	12113	3.162	Liuba County	Hanzhong City
2017	77	0.503061	0.103622	4.35	10.6944	0.00327371	83583	3.8969	1088.56	86.116	0.34777	722.759	0.0384647	0.312449	0.00127226	0.258368	12323	3.17142	Liuba County	Hanzhong City
2018	77	0.61952	0.1462	4.34	10.3775	0.00347208	93144	4.37512	1210.95	95.1379	0.35067	718.433	0.0476044	0.315214	0.00128287	0.259148	9726	2.67935	Liuba County	Hanzhong City
2019	77	0.743045	0.190677	4.34	10.3577	0.00375178	94270	4.58525	1333.34	101.272	0.348879	722.12	0.0458	0.326553	0.00127632	0.259831	9869	2.683	Liuba County	Hanzhong City
2020	77	0.865432	0.234586	3.53	10.2759	0.00396874	113600	6.24646	1351.4	112.214	0.347107	892.351	0.0440471	0.322177	0.00126984	0.260434	10012	2.70708	Liuba County	Hanzhong City
2021	77	0.952195	0.251976	2.72	10.5691	0.00493081	112300	7.90766	1372.55	279.695	0.345353	1163.97	1.39586	0.481554	0.0101074	0.260971	10155	2.73116	Liuba County	Hanzhong City
2012	78	0.0747855	0.02288	42	11.9781	0.00385365	164500	1.55239	642.667	199.694	0.307079	516.929	0.149393	0.452015	0.00151997	0.223855	98264	30.076	Xixiang County	Hanzhong City
2013	78	0.121573	0.035786	42	13.4052	0.00329277	179588	1.79476	554.913	230.873	0.304972	520.5	0.136721	0.416201	0.00150954	0.229195	99524	30.112	Xixiang County	Hanzhong City
2014	78	0.249863	0.058083	42	12.6097	0.00354494	199500	1.93333	573.713	249.616	0.303736	522.619	0.139475	0.406905	0.00159453	0.232352	98670	29.996	Xixiang County	Hanzhong City
2015	78	0.361863	0.087977	42	12.8913	0.00372277	222550	2.15929	577.659	278.789	0.303736	522.619	0.133345	0.392702	0.00123007	0.257297	102531	30.162	Xixiang County	Hanzhong City
2016	78	0.384784	0.088383	41.45	13.2815	0.00299867	239611	2.45428	572.733	312.727	0.303736	529.554	0.125675	0.356398	0.00123007	0.257396	102853	30.177	Xixiang County	Hanzhong City
2017	78	0.482305	0.111466	34.5	12.9035	0.00397963	256329	3.21315	644.605	340.773	0.303736	636.232	0.124489	0.336413	0.00109339	0.25748	104724	30.238	Xixiang County	Hanzhong City
2018	78	0.516319	0.109303	34.46	12.7873	0.00388909	261977	3.38657	716.477	358.75	0.298367	648.433	0.114324	0.357664	0.00102931	0.257552	96384	26.5522	Xixiang County	Hanzhong City
2019	78	0.653705	0.144899	34.47	12.6042	0.00423439	307656	3.5428	788.349	375.408	0.298367	648.245	0.0922981	0.378211	0.00098456	0.257616	97521	26.59	Xixiang County	Hanzhong City
2020	78	0.804168	0.1813	32.15	12.6332	0.00428631	285859	4.16747	794.157	411.878	0.298367	695.023	0.0707799	0.377915	0.000939808	0.257672	98658	26.6779	Xixiang County	Hanzhong City
2021	78	0.857672	0.212747	29.83	12.778	0.00595885	289045	4.79213	81.5881	124.5	0.298367	749.078	0.0735408	0.533052	0.000402775	0.257721	99795	26.7659	Xixiang County	Hanzhong City
2012	79	0.0611117	0.00847	29	11.0596	0.00382393	129086	1.66	18623.8	141.008	0.213747	816.345	0.0890114	0.499186	0.000422404	0.222665	86517	38.552	Zhenba County	Hanzhong City
2013	79	0.144432	0.034359	29	12.562	0.00333402	148470	1.94552	19197.9	165.261	0.213964	815.517	0.0815996	0.456012	0.000422833	0.224763	87623	38.601	Zhenba County	Hanzhong City
2014	79	0.228958	0.061284	29	11.6751	0.00402408	157028	2.13448	19952.4	169.625	0.214136	814.862	0.0717896	0.461388	0.000423173	0.227411	86865	38.464	Zhenba County	Hanzhong City
2015	79	0.416213	0.105218	29	12.0266	0.00421433	178736	2.24724	19544.7	189.613	0.214236	814.483	0.0595543	0.441705	0.000338696	0.255247	89515	38.876	Zhenba County	Hanzhong City
2016	79	0.454437	0.114004	28.41	12.2454	0.00340302	190789	2.76346	23829.3	228.426	0.213522	834.178	0.0659028	0.376012	0.000295371	0.256472	89981	38.857	Zhenba County	Hanzhong City
2017	79	0.534792	0.143804	24.89	12.0247	0.00455332	241629	3.39726	27937.1	246.022	0.212491	956.77	0.0652657	0.353752	0.000293945	0.257525	91886	38.9537	Zhenba County	Hanzhong City
2018	79	0.592589	0.167062	24.87	11.8462	0.00373799	284877	3.71723	32044.8	268.977	0.210616	966.063	0.0503727	0.358937	0.000291351	0.25844	93384	37.7312	Zhenba County	Hanzhong City
2019	79	0.69573	0.197716	24.88	11.7166	0.00416547	373966	3.33557	36152.6	241.457	0.210336	966.961	0.0358234	0.439253	0.000290964	0.259241	95217	37.744	Zhenba County	Hanzhong City
2020	79	0.787627	0.228371	21.09	11.7445	0.00469476	305168	4.48959	37412.2	275.489	0.210056	1142.25	0.0218238	0.41953	0.000290577	0.25995	97050	37.8468	Zhenba County	Hanzhong City
2021	79	0.91802	0.259025	17.3	12.0012	0.00614236	301825	5.64362	38771.9	454.728	0.209778	1394.34	0.0670489	0.159152	0.000497471	0.260581	98883	37.9496	Zhenba County	Hanzhong City
2012	80	0.223657	0.062404	56.29	12.7276	0.00346812	179216	3.14692	2867.34	3185.97	0.724198	265.109	0.0646657	0.156171	0.000938149	0.227942	103517	17.774	Hantai District	Hanzhong City
2013	80	0.296417	0.075524	56.82	14.055	0.00306007	212643	3.58835	18422.9	3667.09	0.729477	260.736	0.085345	0.144571	0.00101249	0.227246	104845	17.796	Hantai District	Hanzhong City
2014	80	0.3237	0.08586	57.2	13.3858	0.00318402	216471	4.2535	18587.9	4141.19	0.731551	258.269	0.0854591	0.133221	0.00115075	0.226035	103886	17.729	Hantai District	Hanzhong City
2015	80	0.423056	0.109384	57.52	13.7594	0.00306015	264497	4.38578	18597.7	4537.23	0.739308	254.138	0.118579	0.130887	0.00116295	0.258494	107582	17.755	Hantai District	Hanzhong City
2016	80	0.36965	0.088583	57.05	14.0488	0.00253548	285947	5.37686	2182.4	5169.06	0.768431	246.521	0.114467	0.117184	0.00127986	0.258844	107944	17.423	Hantai District	Hanzhong City
2017	80	0.421816	0.095348	54.08	13.6333	0.00320874	319687	5.96413	12996.4	5801.08	0.783869	254.937	0.106973	0.0810265	0.00130558	0.259145	110074	17.1759	Hantai District	Hanzhong City
2018	80	0.438406	0.101381	54.02	13.5535	0.00343535	365757	6.9615	23810.4	6763.67	0.786551	254.35	0.106409	0.0765412	0.00138282	0.259405	113270	16.5195	Hantai District	Hanzhong City
2019	80	0.519989	0.122862	54.03	13.3321	0.00385077	377779	6.9554	34624.4	6758.99	0.801127	249.676	0.108158	0.0836453	0.00148258	0.259632	114009	16.429	Hantai District	Hanzhong City
2020	80	0.590901	0.139007	61.82	13.2356	0.00372529	328417	6.74734	34944.5	6754.32	0.816254	214.17	0.109884	0.0907592	0.0015861	0.259833	114748	16.4806	Hantai District	Hanzhong City
2021	80	0.325755	0.074168	69.61	13.3821	0.00481373	279055	6.53928	35341.8	1737.23	0.831964	186.611	0.177197	0.315732	0.00100077	0.260012	115487	16.5322	Hantai District	Hanzhong City
2012	81	0.0749621	0.017294	43	10.7415	0.00369079	164777	2.45293	15153.2	442.653	0.466901	610.023	0.154857	0.320755	0.000609965	0.24719	132994	30.811	Mian County	Hanzhong City
2013	81	0.144133	0.039278	43	12.065	0.00353029	187699	2.59932	1397.23	467.716	0.465959	611.256	0.159737	0.322779	0.000646781	0.251869	134696	30.852	Mian County	Hanzhong City
2014	81	0.207919	0.045474	43	11.3808	0.0034438	195829	2.45932	13265.9	439.526	0.465304	612.116	0.165901	0.356678	0.000721857	0.253556	133513	30.736	Mian County	Hanzhong City
2015	81	0.230727	0.063749	43	11.7954	0.00341624	223185	2.35256	13272.5	420.449	0.462511	615.814	0.170594	0.400844	0.000641994	0.257362	131171	30.465	Mian County	Hanzhong City
2016	81	0.245332	0.054109	42.76	11.9433	0.00284252	263309	3.23152	13349.3	537.282	0.460337	622.194	0.169887	0.317394	0.000638978	0.257723	132523	30.322	Mian County	Hanzhong City
2017	81	0.321672	0.079237	39.4	11.6789	0.00336252	274556	3.74569	9514.92	612.545	0.436872	711.523	0.165769	0.256128	0.000677748	0.258031	131460	30.0276	Mian County	Hanzhong City
2018	81	0.350228	0.078232	38.41	11.5475	0.00357848	300720	3.82779	5680.52	611.079	0.428871	743.478	0.158976	0.284952	0.000700354	0.258296	136618	29.8669	Mian County	Hanzhong City
2019	81	0.405567	0.085796	38.41	11.3863	0.00381747	314217	4.18979	1846.12	668.868	0.431942	738.193	0.158556	0.286106	0.000740636	0.258528	136520	29.763	Mian County	Hanzhong City
2020	81	0.481248	0.093952	34.49	11.3182	0.00415161	310432	5.18237	1856.45	742.892	0.435057	816.208	0.158134	0.280802	0.0007815	0.258731	136422	29.8406	Mian County	Hanzhong City
2021	81	0.705065	0.169119	30.57	11.542	0.00508099	275982	6.17495	18755.6	477.556	0.438217	914.23	0.168356	0.287977	0.000644053	0.258911	136324	29.9182	Mian County	Hanzhong City
2012	82	0.29411	0.078671	56	11.364	0.0045141	218682	2.41714	2876.49	476.133	0.422643	539.714	0.146924	0.273249	0.000661726	0.261222	147416	38.0427	Nanzheng District	Hanzhong City
2013	82	0.34655	0.095055	56	12.7038	0.00405407	235237	2.75714	24265.4	545.467	0.423484	538.643	0.136403	0.254746	0.000729346	0.266314	149315	37.0226	Nanzheng District	Hanzhong City
2014	82	0.380482	0.094856	57	11.9428	0.00428053	264524	2.89263	26123.4	583.853	0.419562	534.14	0.128879	0.249884	0.000722591	0.26894	148007	36.0026	Nanzheng District	Hanzhong City
2015	82	0.61933	0.155598	57	12.4254	0.00394307	293040	3.5386	2636.35	616.395	0.437555	512.175	0.120031	0.25469	0.000719326	0.257764	148153	34.9825	Nanzheng District	Hanzhong City
2016	82	0.636426	0.166401	56.53	12.5784	0.00333032	311057	3.44333	26470	681.409	0.437495	516.505	0.110834	0.23352	0.000787725	0.25782	148790	33.9624	Nanzheng District	Hanzhong City
2017	82	0.544444	0.119316	47.77	12.2749	0.0041132	346227	4.53966	29824.3	772.008	0.371866	719.091	0.102815	0.246089	0.000669558	0.257868	147828	32.9424	Nanzheng District	Hanzhong City
2018	82	0.533306	0.118951	47.72	12.1066	0.00415725	382132	4.57694	33178.6	777.54	0.367248	728.898	0.0963393	0.270193	0.000661243	0.257909	156499	31.9223	Nanzheng District	Hanzhong City
2019	82	0.575467	0.129704	47.74	12.009	0.00462916	390344	4.72443	36532.9	802.935	0.353077	757.834	0.0960908	0.286684	0.000635728	0.257946	155634	31.831	Nanzheng District	Hanzhong City
2020	82	0.693806	0.162339	46.62	12.0119	0.00488267	424527	5.14259	36853.2	853.498	0.339959	805.985	0.0958396	0.293255	0.000612109	0.257978	154769	31.927	Nanzheng District	Hanzhong City
2021	82	0.719346	0.168318	45.5	12.2108	0.00618719	375994	5.56074	58162.6	428.266	0.327781	856.506	0.221723	0.509301	0.000513202	0.258006	153904	32.0229	Nanzheng District	Hanzhong City
2012	83	0.036622	0.000301	54	12.084	0.00357903	182600	2.56926	47945.9	610.552	0.450295	450.481	0.246269	0.491485	0.00094549	0.263131	139827	27.133	Chenggu County	Hanzhong City
2013	83	0.245079	0.048139	54	13.422	0.00323514	211118	3.12667	4257.47	745.43	0.450314	450.463	0.261405	0.430312	0.000986639	0.267836	141604	27.167	Chenggu County	Hanzhong City
2014	83	0.378531	0.077482	54	12.7313	0.00326283	227081	3.56519	4695.27	849.978	0.453577	447.222	0.266641	0.388963	0.0010352	0.271355	140327	27.061	Chenggu County	Hanzhong City
2015	83	0.441372	0.089378	54	13.0978	0.00314695	280012	4.22593	49544.9	959.029	0.453708	447.093	0.249906	0.368512	0.000952657	0.258311	141017	26.587	Chenggu County	Hanzhong City
2016	83	0.423606	0.100194	54.27	13.3674	0.00269135	306988	4.54653	65577.4	1089.36	0.456431	442.215	0.24065	0.332083	0.00100004	0.259027	141359	26.457	Chenggu County	Hanzhong City
2017	83	0.516033	0.122116	47.24	12.9988	0.00334191	340164	5.51227	46999.4	1149.67	0.458168	506.097	0.245863	0.291918	0.00104568	0.259639	141453	26.1663	Chenggu County	Hanzhong City
2018	83	0.633305	0.156634	47.19	12.8514	0.00359597	372798	4.92564	28421.5	1026.23	0.460305	504.281	0.221938	0.359058	0.00105055	0.260169	155291	28.3513	Chenggu County	Hanzhong City
2019	83	0.673539	0.168364	47.21	12.7018	0.00400876	400825	5.32544	9843.49	1110	0.460615	503.728	0.22066	0.361573	0.00105126	0.260633	154772	28.268	Chenggu County	Hanzhong City
2020	83	0.721941	0.182554	44.2	12.7383	0.00386871	374989	6.39	9165.73	1246.97	0.460925	537.67	0.219373	0.348215	0.00105197	0.261041	154253	28.3409	Chenggu County	Hanzhong City
2021	83	0.88702	0.2319	41.19	12.9039	0.00509182	360158	7.45456	1816.77	325.607	0.461235	576.572	0.128104	0.436674	0.000800034	0.261404	153734	28.4138	Chenggu County	Hanzhong City
2012	84	0.0278352	0.000316	45	11.4323	0.00324934	169489	1.89	14616.2	265.284	0.335702	620.511	0.140757	0.418904	0.000752068	0.225306	155658	33.215	Yang County	Hanzhong City
2013	84	0.162173	0.04265	45	12.7446	0.00288588	188892	2.97778	12636.5	294.448	0.338014	616.267	0.151606	0.403372	0.000793307	0.229553	157626	33.26	Yang County	Hanzhong City
2014	84	0.208004	0.046377	45	12.0369	0.00307887	221117	2.228	12799.2	312.726	0.339188	614.133	0.148991	0.397605	0.000832248	0.230985	156204	33.131	Yang County	Hanzhong City
2015	84	0.262176	0.053175	45	12.3206	0.00312749	247469	2.36733	13216.8	332.283	0.337308	617.556	0.11012	0.401729	0.000719683	0.258821	157065	32.9625	Yang County	Hanzhong City
2016	84	0.442093	0.107185	44.93	12.6377	0.00261977	276789	2.69852	1491.62	377.105	0.335114	622.568	0.108904	0.360878	0.000715001	0.259344	157753	32.794	Yang County	Hanzhong City
2017	84	0.418337	0.105489	38.74	12.2811	0.00327507	306937	3.61545	1068.8	436.876	0.334408	723.567	0.119691	0.36215	0.000713496	0.259789	157255	32.6254	Yang County	Hanzhong City
2018	84	0.616263	0.153846	38.7	12.0793	0.00339625	315140	4.21597	645.985	508.915	0.335162	722.687	0.117865	0.342748	0.000786613	0.260174	165333	33.3506	Yang County	Hanzhong City
2019	84	0.684787	0.165029	38.71	12.0005	0.00396018	337963	4.4525	223.165	537.605	0.335234	722.346	0.119968	0.354618	0.000858308	0.26051	165044	33.236	Yang County	Hanzhong City
2020	84	0.880332	0.211421	34.54	12.0489	0.00365393	340335	5.5849	22491.9	601.692	0.335306	809.38	0.122078	0.343796	0.000930033	0.260806	164755	33.3233	Yang County	Hanzhong City
2021	84	0.955144	0.225291	30.37	12.2602	0.0050814	302461	6.7173	1277.58	508.515	0.335378	920.316	0.303467	0.221605	0.00139535	0.261068	164466	33.4106	Yang County	Hanzhong City
2012	85	0.29927	0.073147	101.93	13.1646	0.00238625	321967	1.83923	494.244	514.603	0.199084	421.191	0.226695	0.201032	0.00100158	0.211165	217363	54.751	Hanbin District	Ankang City
2013	85	0.313702	0.083309	102.45	14.855	0.00216557	355397	2.53587	382.279	577.519	0.199979	417.179	0.221696	0.183958	0.00124006	0.213236	218628	54.745	Hanbin District	Ankang City
2014	85	0.409836	0.096778	102.58	13.9468	0.00271129	409899	2.27842	3326.73	641.559	0.203803	408.832	0.235541	0.17284	0.00131146	0.213524	214162	53.852	Hanbin District	Ankang City
2015	85	0.478481	0.109573	100.84	14.0447	0.00256373	492528	2.55952	3492.49	692.177	0.205548	412.356	0.237284	0.167149	0.00134674	0.243902	214262	53.745	Hanbin District	Ankang City
2016	85	0.499802	0.105072	100.83	14.7472	0.00207389	510102	2.88525	3518.4	798.573	0.209277	405.048	0.242355	0.186676	0.00142014	0.24376	215201	53.583	Hanbin District	Ankang City
2017	85	0.503889	0.08862	88.04	14.2868	0.0031259	529209	3.88869	4753.66	939.775	0.209971	462.358	0.239919	0.176925	0.00152312	0.243638	212784	53.067	Hanbin District	Ankang City
2018	85	0.615286	0.10543	88.38	14.1642	0.00229795	643953	4.31364	5988.92	1045.7	0.210696	458.995	0.258543	0.175447	0.00162698	0.243533	186700	46.643	Hanbin District	Ankang City
2019	85	0.710266	0.125231	88.64	13.9997	0.00250996	740291	4.23985	7224.19	1031.62	0.211426	456.069	0.239813	0.194511	0.00173156	0.243442	189685	46.455	Hanbin District	Ankang City
2020	85	0.785095	0.145031	89.49	13.8922	0.00306739	724265	0.448497	7537.82	99.451	0.21216	450.173	0.0576945	0.461198	0.000421983	0.243361	192670	46.567	Hanbin District	Ankang City
2021	85	0.158675	0.000276	90.34	13.9592	0.00417577	708239	-3.34285	894.255	70.162	0.367064	257.749	0.0258823	0.400246	0.000343569	0.243289	195655	46.679	Hanbin District	Ankang City
2012	86	0.121718	0.017706	17	10.752	0.00356915	98712	1.82118	5468.27	158.282	0.123765	1010.82	0.0730633	0.342755	0.000465549	0.219338	64013	24.827	Langao County	Ankang City
2013	86	0.20608	0.05637	17	12.1658	0.00334037	122156	2.65294	3411.83	179.407	0.123794	1010.59	0.0714439	0.321535	0.000523865	0.221451	65142	24.836	Langao County	Ankang City
2014	86	0.285008	0.083259	17	11.4046	0.00403556	128389	2.36588	3681.59	205.059	0.126541	988.647	0.0733862	0.296614	0.000535491	0.221766	65530	24.693	Langao County	Ankang City
2015	86	0.360389	0.102462	17	11.7533	0.00393043	145268	2.67824	429.356	232.652	0.124737	1002.94	0.0687918	0.272697	0.00058651	0.242916	67290	24.885	Langao County	Ankang City
2016	86	0.426695	0.116817	16.82	11.9863	0.00321785	165134	3.12426	7424.12	268.523	0.124686	1014.09	0.0650173	0.276415	0.00058627	0.243593	67905	24.871	Langao County	Ankang City
2017	86	0.447924	0.12372	15.6	11.7634	0.00444798	187182	3.84938	9563.87	303.304	0.126548	1077.31	0.0636464	0.27382	0.000595026	0.244173	68582	24.828	Langao County	Ankang City
2018	86	0.56215	0.148638	15.65	11.5154	0.00374968	208179	3.77278	11703.6	296.469	0.126511	1074.19	0.100176	0.309906	0.000654333	0.244676	41497	14.592	Langao County	Ankang City
2019	86	0.722778	0.20724	15.67	11.489	0.00382094	304832	3.17218	13843.4	248.8	0.126473	1073.13	0.0932996	0.40476	0.000713606	0.245115	42326	14.522	Langao County	Ankang City
2020	86	0.768293	0.212516	13.5	11.3978	0.00450077	302919	4.74137	14444.6	281.044	0.126436	1246	0.107195	0.273518	0.000594495	0.245503	43155	14.748	Langao County	Ankang City
2021	86	0.527763	0.157985	11.33	11.7292	0.00500955	237918	6.31057	2324.9	242.31	0.115718	1622.15	0.252046	0.400202	0.000979379	0.245848	43984	14.974	Langao County	Ankang City
2012	87	0.172626	0.029031	31	12.9108	0.00276423	135000	1.89645	1438.62	429.377	0.254715	750.613	0.11053	0.342477	0.000816537	0.226936	100027	25.686	Hanyin County	Ankang City
2013	87	0.217822	0.06003	31	14.5535	0.00236475	157000	2.27742	896.899	501.392	0.257235	743.258	0.107044	0.305186	0.00095482	0.232207	102453	25.693	Hanyin County	Ankang City
2014	87	0.3238	0.080046	31	13.7106	0.00294924	171000	2.5	966.589	567.766	0.258289	740.226	0.107195	0.281772	0.000958731	0.234729	103270	25.913	Hanyin County	Ankang City
2015	87	0.445144	0.126195	31	13.789	0.00293558	189000	2.77935	114.553	631.209	0.258808	738.742	0.107383	0.26808	0.00100432	0.251513	101208	25.398	Hanyin County	Ankang City
2016	87	0.448784	0.110638	31.12	14.3937	0.00224254	192000	3.58846	121.181	697.363	0.258605	736.472	0.105553	0.267678	0.00104717	0.251691	101646	25.26	Hanyin County	Ankang City
2017	87	0.516789	0.128671	24.9	14.0466	0.00336058	207000	4.32418	177.285	788.793	0.259829	916.104	0.10686	0.263193	0.00109596	0.251843	100412	24.923	Hanyin County	Ankang City
2018	87	0.588326	0.135109	24.97	13.9139	0.00263249	258700	4.55479	233.388	824.189	0.261907	906.288	0.106126	0.277292	0.00114892	0.251975	96263	23.297	Hanyin County	Ankang City
2019	87	0.669537	0.146585	25.01	13.6438	0.00292727	275000	4.45782	289.491	733.733	0.264019	897.601	0.0987511	0.340012	0.00120273	0.252091	98247	23.192	Hanyin County	Ankang City
2020	87	0.755096	0.165513	24.02	13.6035	0.00350791	280000	4.61746	2178.45	812.538	0.266165	927.061	0.0520996	0.0869415	0.00053889	0.252193	100231	23.371	Hanyin County	Ankang City
2021	87	0.457571	0.119781	23.03	13.6942	0.0048391	255000	4.77711	7629.5	274.426	0.452924	568.215	0.0539451	0.255749	0.000917011	0.252283	102215	23.55	Hanyin County	Ankang City
2012	88	0.177146	0.038576	18	12.6366	0.00290019	121498	3.34556	4755.79	315.237	0.308945	727.722	0.0873621	0.23185	0.0009161	0.224682	66459	19.264	Shiquan County	Ankang City
2013	88	0.134959	0.034265	18	14.205	0.0022616	118995	3.42222	2995.23	361.214	0.308921	727.778	0.0825975	0.210398	0.000916031	0.227917	67048	19.263	Shiquan County	Ankang City
2014	88	0.246657	0.055067	18	13.4567	0.00284085	133666	3.49889	3232.19	415.435	0.308662	728.389	0.0817541	0.194176	0.000991534	0.229639	66859	19.138	Shiquan County	Ankang City
2015	88	0.34628	0.087221	18	13.4842	0.00286167	161888	3.96833	3395.93	471.174	0.308497	728.778	0.0744089	0.1776	0.000991005	0.251003	69911	19.353	Shiquan County	Ankang City
2016	88	0.431646	0.105706	18	14.0736	0.00212488	157006	4.49778	3448.84	527.771	0.308239	729.389	0.0684185	0.182485	0.00106634	0.252926	70668	19.358	Shiquan County	Ankang City
2017	88	0.493324	0.130888	18.28	13.6886	0.00318525	184729	5.26217	2563.74	634.515	0.309063	716.302	0.0670273	0.17378	0.00114556	0.254571	71180	19.338	Shiquan County	Ankang City
2018	88	0.645475	0.172278	17.32	13.5779	0.00269919	215990	5.43524	1678.64	620.965	0.307957	758.718	0.0753807	0.198204	0.00121756	0.255995	61196	15.774	Shiquan County	Ankang City
2019	88	0.728392	0.190282	17.38	13.328	0.00319319	224081	4.77678	793.539	547.628	0.30686	758.803	0.0712059	0.248143	0.00128905	0.25724	62565	15.723	Shiquan County	Ankang City
2020	88	0.79997	0.204615	17.42	13.2396	0.00339045	235086	5.38978	741.768	619.327	0.30577	759.759	0.00683517	0.0670657	0.000377786	0.258337	63934	15.915	Shiquan County	Ankang City
2021	88	0.658372	0.134666	15.32	13.3338	0.00492158	218040	1.23564	8517.37	51.4682	1.19518	221.018	0.0060181	0.373201	0.00147667	0.259311	65303	16.107	Shiquan County	Ankang City
2012	89	0.157747	0.038324	7	9.27667	0.00328479	68973	3.5	5282.26	58.222	0.649	484.286	0.0175836	0.349433	0.00147493	0.221946	19848	4.785	Ningshan County	Ankang City
2013	89	0.198421	0.055849	7	10.7822	0.00281229	80249	3.17429	3371.98	60.4133	0.648617	484.571	0.0174567	0.348033	0.00147406	0.228303	19935	4.801	Ningshan County	Ankang City
2014	89	0.253889	0.072313	7	9.96342	0.00309185	80040	3.52857	3633.36	66.6667	0.646521	486.143	0.0179575	0.327712	0.00146929	0.232732	19212	4.946	Ningshan County	Ankang City
2015	89	0.310407	0.0842	7	10.2394	0.00315595	89699	3.82857	3833.91	72.3763	0.646331	486.286	0.0177624	0.320763	0.00176263	0.246262	19423	5.106	Ningshan County	Ankang City
2016	89	0.373516	0.099115	7.26	10.3358	0.00281568	95437	4.15427	3847.93	82.0011	0.646331	468.871	0.0175412	0.312599	0.00176263	0.245926	19611	5.089	Ningshan County	Ankang City
2017	89	0.360029	0.091083	7.13	10.1704	0.00352122	113223	4.86558	5211.89	94.3219	0.646331	477.419	0.0172878	0.297352	0.00176263	0.24564	19667	5.151	Ningshan County	Ankang City
2018	89	0.432566	0.102364	7.03	9.83155	0.00328787	120909	4.51213	6575.85	86.2433	0.644438	485.633	0.0275418	0.353187	0.00205038	0.245392	12127	2.972	Ningshan County	Ankang City
2019	89	0.534993	0.142024	7.05	9.94693	0.00365835	138176	3.28482	7939.82	62.9636	0.642555	485.674	0.0273519	0.5221	0.00233645	0.245177	12394	2.965	Ningshan County	Ankang City
2020	89	0.582611	0.16207	5.99	9.86461	0.00357195	153656	4.6344	8283.75	66.1773	0.640684	573.289	0.411026	0.720148	0.00407688	0.244987	12661	3.007	Ningshan County	Ankang City
2021	89	0.481962	0.123316	4.93	10.2793	0.00518233	145318	5.98397	12928.7	126.971	0.0902202	4946.45	0.402537	0.395642	0.0005741	0.244819	12928	3.049	Ningshan County	Ankang City
2012	90	0.170239	0.030687	34	11.909	0.00335041	155396	1.59941	86.9924	246.733	0.0979395	716.765	0.0486956	0.355053	0.000574477	0.228041	106868	42.147	Ziyang County	Ankang City
2013	90	0.173713	0.03562	35	13.4579	0.00317772	178088	1.85114	5361.94	289.241	0.0984282	692.829	0.0475479	0.303386	0.000659821	0.234667	108375	42.152	Ziyang County	Ankang City
2014	90	0.256379	0.067346	34	12.5982	0.00375629	192301	2.19353	977.333	332.946	0.0983876	713.5	0.0469892	0.27022	0.000659549	0.239499	109089	42.022	Ziyang County	Ankang City
2015	90	0.342543	0.10249	34	12.8725	0.00373996	210080	2.36759	1274.64	359.286	0.0984039	713.382	0.0441915	0.260308	0.000700886	0.254569	111311	42.459	Ziyang County	Ankang City
2016	90	0.370905	0.103948	33.7	13.233	0.00303061	227310	2.69347	1369.87	405.223	0.0993005	713.234	0.042386	0.278818	0.000707272	0.256516	111499	42.083	Ziyang County	Ankang City
2017	90	0.45216	0.119431	28.72	12.9601	0.0042882	265788	3.68994	8121.1	462.725	0.105186	790.077	0.0454303	0.271666	0.000793266	0.258184	112260	41.935	Ziyang County	Ankang City
2018	90	0.619421	0.142013	28.67	12.8066	0.00337692	299279	3.82251	14872.3	489.247	0.105713	787.513	0.0363898	0.282945	0.000885818	0.25963	102996	38.746	Ziyang County	Ankang City
2019	90	0.664227	0.166213	28.7	12.6147	0.00353624	435244	3.52784	21623.6	448.794	0.106245	782.753	0.0228032	0.336798	0.000979301	0.260895	105073	38.621	Ziyang County	Ankang City
2020	90	0.786298	0.209263	26.1	12.6045	0.00432388	465950	4.13196	22716.8	481.447	0.106782	856.398	0.0508726	0.0842419	0.00035791	0.262012	107150	38.2	Ziyang County	Ankang City
2021	90	0.317611	0.056324	23.5	12.8395	0.00518743	343931	4.73608	12384.7	376.384	0.139025	730.553	0.218105	0.252376	0.0013397	0.263004	109227	37.779	Ziyang County	Ankang City
2012	91	0.118249	0.02678	46	12.6094	0.00215088	212079	2.17413	7612.85	281.401	0.181339	790.457	0.19765	0.222434	0.000742554	0.222821	120091	45.323	Xunyang City	Ankang City
2013	91	0.199365	0.049779	46	14.3558	0.00203206	243039	2.44283	4727.67	317.34	0.181095	791.522	0.200205	0.20429	0.000796484	0.229066	122649	45.293	Xunyang City	Ankang City
2014	91	0.355599	0.073257	46	13.4849	0.00245428	262860	2.69769	55.7812	350.438	0.180441	794.391	0.189543	0.194448	0.000820973	0.233178	123708	45.169	Xunyang City	Ankang City
2015	91	0.423885	0.108076	46	13.5173	0.00227894	250293	2.99634	521.879	389.24	0.179909	796.739	0.185891	0.181131	0.000818554	0.248373	125482	45.582	Xunyang City	Ankang City
2016	91	0.42212	0.115232	45.82	14.2984	0.00199156	296845	3.48988	5155.9	451.483	0.179865	800.065	0.181288	0.208487	0.000845631	0.250102	126092	45.524	Xunyang City	Ankang City
2017	91	0.464067	0.121977	43.17	13.8811	0.00293118	329054	4.35454	3930.21	530.883	0.180155	847.811	0.179846	0.199772	0.000874317	0.251587	126397	45.365	Xunyang City	Ankang City
2018	91	0.576185	0.134041	43.47	13.6643	0.00216493	375535	4.32949	2704.52	528.238	0.179312	845.917	0.196814	0.223351	0.000924617	0.252876	115459	40.371	Xunyang City	Ankang City
2019	91	0.64387	0.14379	43.57	13.6188	0.0021912	399382	3.98163	1478.82	489.918	0.178477	847.923	0.192871	0.265166	0.000974448	0.254006	117778	40.221	Xunyang City	Ankang City
2020	91	0.713387	0.154262	35.79	13.4963	0.00276337	410610	5.68726	1895.88	566.892	0.17765	1037.05	0.0661715	0.0506894	0.000296368	0.255004	120097	40.23	Xunyang City	Ankang City
2021	91	0.531753	0.131313	28.01	13.5133	0.00372617	380289	7.39288	6666.9	113.555	0.476421	494.109	0.0379771	0.421567	0.000794798	0.255893	122416	40.239	Xunyang City	Ankang City
2012	92	0.131753	0.029473	24	11.2862	0.00320987	122745	2.14167	4126.11	190.782	0.223177	765.5	0.0634541	0.35017	0.000653168	0.237945	73628	24.885	Pingli County	Ankang City
2013	92	0.185489	0.043471	24	12.7098	0.00311196	142723	2.52458	2548.67	228.814	0.223664	763.833	0.0646804	0.303443	0.000709142	0.242282	74041	24.889	Pingli County	Ankang City
2014	92	0.282202	0.050739	23	11.934	0.00364589	161892	2.95348	2738.99	256.533	0.224214	795.087	0.06452	0.283555	0.000710888	0.245067	74132	24.771	Pingli County	Ankang City
2015	92	0.353586	0.077946	23	12.2183	0.00348209	164530	3.36435	2869.86	291.881	0.225882	789.217	0.0587532	0.259385	0.000771265	0.25454	76898	24.858	Pingli County	Ankang City
2016	92	0.467479	0.105907	23.27	12.6295	0.00293495	184149	3.76166	2893.37	330.514	0.22473	784.057	0.0565109	0.230497	0.000822143	0.256137	77631	24.816	Pingli County	Ankang City
2017	92	0.519095	0.126658	19.53	12.3367	0.00403806	202612	5.11116	3868.7	376.227	0.225088	932.719	0.0559726	0.225685	0.000878349	0.257507	78199	24.765	Pingli County	Ankang City
2018	92	0.575625	0.13955	19.59	12.1054	0.00334042	241096	5.33716	4844.03	392.371	0.220453	949.413	0.0723627	0.238639	0.000967794	0.258695	56507	17.276	Pingli County	Ankang City
2019	92	0.651412	0.150094	19.63	12.1008	0.00332775	266031	4.53875	5819.36	336.464	0.216005	966.989	0.0683262	0.304226	0.00105363	0.259735	57606	17.177	Pingli County	Ankang City
2020	92	0.728835	0.167641	18.13	11.9698	0.00406652	283384	5.73998	622.676	392.998	0.211733	1068.12	0.0192999	0.0449456	0.000206558	0.260653	58705	17.553	Pingli County	Ankang City
2021	92	0.0607341	0.011787	16.63	12.2815	0.00467388	231155	6.94122	3746.75	45.3172	0.829497	297.234	0.0213531	0.438667	0.000809225	0.26147	59804	17.929	Pingli County	Ankang City
2012	93	0.176117	0.035301	6	9.7065	0.00396888	58781	2.15833	2322.75	86.5063	0.316642	824.667	0.0522811	0.426093	0.000808407	0.219204	27180	9.302	Zhenping County	Ankang City
2013	93	0.0817634	0.019654	6	11.0828	0.00360854	71336	2.1	1449.53	80.2929	0.315494	827.667	0.0510909	0.475821	0.000805477	0.223654	27363	9.341	Zhenping County	Ankang City
2014	93	0.0853751	0.020215	6	10.3455	0.00451119	69333	2.26	1564.95	90.2796	0.315558	827.5	0.0517076	0.44194	0.000805639	0.228479	27056	9.351	Zhenping County	Ankang City
2015	93	0.0879779	0.020558	6	10.7166	0.00414599	74866	2.54333	1643.89	101.598	0.314544	830.167	0.0502288	0.414817	0.00100381	0.246523	27534	9.416	Zhenping County	Ankang City
2016	93	0.0868533	0.022518	5.94	10.7873	0.00375814	88460	3.2364	1657.45	127.678	0.317605	830.471	0.0485092	0.396128	0.00101358	0.24774	27871	9.419	Zhenping County	Ankang City
2017	93	0.0832177	0.016549	5.16	10.7008	0.00472811	90509	4.46277	2244.45	153.315	0.318056	954.651	0.0475151	0.367211	0.00101502	0.248783	27949	9.416	Zhenping County	Ankang City
2018	93	0.089319	0.018949	5.18	10.3564	0.00413523	101101	4.69955	2831.46	162.058	0.316195	956.564	0.0624881	0.382501	0.00100908	0.249687	21076	7.056	Zhenping County	Ankang City
2019	93	0.10262	0.022425	5.18	10.4427	0.00403467	123318	4.58875	3418.46	158.254	0.314355	962.162	0.0606765	0.427641	0.00100321	0.250479	21524	7.017	Zhenping County	Ankang City
2020	93	0.108722	0.024824	4.74	10.3382	0.00482751	129533	5.52516	3579.58	174.361	0.312536	1057.59	1.0882	0.725755	0.00379015	0.251177	21972	7.112	Zhenping County	Ankang City
2021	93	0.469937	0.06196	4.3	10.8179	0.00526176	123562	6.46157	969.471	225.766	0.0432707	8420.47	0.311017	0.340422	0.000331418	0.251797	22420	7.207	Zhenping County	Ankang City
2012	94	0.339545	0.09834	21	12.736	0.00217129	126000	1.97948	61.1229	285.636	0.120433	661.667	0.106505	0.29071	0.000935588	0.22492	56326	18.905	Baihe County	Ankang City
2013	94	0.042315	0.011978	21	14.3148	0.00241577	134567	2.29857	375.251	332.209	0.12052	661.19	0.103569	0.262735	0.000936262	0.229128	56706	18.9	Baihe County	Ankang City
2014	94	0.0488726	0.013291	21	13.494	0.00266631	142285	2.49667	46.1878	360.84	0.118707	671.286	0.101405	0.250301	0.000993119	0.231511	57364	18.846	Baihe County	Ankang City
2015	94	0.0751601	0.017068	21	13.5735	0.00245233	165400	2.83524	426.575	409.773	0.118707	671.286	0.10495	0.229763	0.000993119	0.248974	58180	18.729	Baihe County	Ankang City
2016	94	0.0882489	0.022159	21.39	14.3515	0.00226522	167503	3.15615	429.732	464.625	0.118716	659	0.100469	0.254242	0.00099319	0.248274	58376	18.706	Baihe County	Ankang City
2017	94	0.085432	0.019663	16.53	13.9541	0.00312272	200616	4.78969	582.333	544.897	0.118707	852.813	0.0958234	0.240125	0.00106406	0.247678	58900	18.683	Baihe County	Ankang City
2018	94	0.124877	0.027627	16.58	13.7202	0.00238264	228900	4.81568	734.934	549.511	0.118229	853.679	0.0976272	0.261249	0.00113042	0.247163	56726	17.397	Baihe County	Ankang City
2019	94	0.32254	0.075986	16.61	13.7592	0.002257	265050	4.27838	887.535	489.076	0.117755	855.569	0.0948838	0.31953	0.00119626	0.246715	57249	17.329	Baihe County	Ankang City
2020	94	0.363337	0.083104	16.28	13.5671	0.0032557	345566	4.86788	928.778	545.328	0.117285	876.413	0.274441	0.258875	0.000981217	0.246321	57772	17.513	Baihe County	Ankang City
2021	94	0.570106	0.118165	15.95	13.6024	0.00375826	295048	5.45739	6982.13	678.665	0.077552	1352.85	0.19602	0.233355	0.000695152	0.245971	58295	17.697	Baihe County	Ankang City
2012	95	0.171298	0.033987	53	10.1998	0.00237722	198269	2.4434	7175.79	405.501	0.246995	403.358	0.0650525	0.224941	0.000748433	0.204194	107590	35.4735	Shangzhou District	Shangluo City
2013	95	0.192855	0.053585	55	12.0244	0.00178025	212718	2.14	2472.72	440.307	0.248717	386	0.0608864	0.205015	0.000800754	0.208454	108103	32.9402	Shangzhou District	Shangluo City
2014	95	0.410817	0.098493	56	11.2703	0.00245257	245118	2.19464	2584.77	459.955	0.251777	374.5	0.0745846	0.20949	0.000810605	0.212435	81183	29.8535	Shangzhou District	Shangluo City
2015	95	0.441367	0.108516	56	11.3427	0.00236407	271961	2.43179	2695.41	509.319	0.251837	374.411	0.0934429	0.192574	0.00047694	0.240767	104620	26.7335	Shangzhou District	Shangluo City
2016	95	0.433284	0.113321	56.62	11.6733	0.00219591	310358	2.71123	2767.99	574.513	0.250107	372.872	0.0822482	0.167856	0.000473664	0.24032	105291	29.089	Shangzhou District	Shangluo City
2017	95	0.466243	0.10349	54.08	11.4968	0.00273819	313492	2.83858	3471.81	574.515	0.247389	394.675	0.079075	0.188043	0.000468516	0.239937	97768	28.758	Shangzhou District	Shangluo City
2018	95	0.532649	0.130177	54.05	11.2023	0.00229874	366900	2.95554	4175.62	586.632	0.246189	396.818	0.076336	0.203929	0.000466244	0.239605	90416	24.458	Shangzhou District	Shangluo City
2019	95	0.654264	0.156493	54.03	11.4193	0.00243047	413367	2.62581	4879.43	529.903	0.245001	398.89	0.0664537	0.247647	0.000463994	0.239314	91387	27.287	Shangzhou District	Shangluo City
2020	95	0.761804	0.182809	47.53	11.2808	0.00244842	333721	3.189	538.737	567.264	0.243825	455.628	0.176671	0.204522	0.000646472	0.239058	92358	30.116	Shangzhou District	Shangluo City
2021	95	0.526646	0.140433	41.03	11.3498	0.00353773	330218	3.75218	455.639	264.558	0.167857	766.683	0.184659	0.487506	0.000476841	0.238829	93329	32.945	Shangzhou District	Shangluo City
2012	96	0.182427	0.029	46	9.97866	0.00243241	206015	1.88696	559.858	292.721	0.471959	688.5	0.111073	0.440037	0.000505194	0.215085	163415	42.9202	Luonan County	Shangluo City
2013	96	0.200078	0.050998	46	11.8533	0.00186459	220265	2.13435	1751.43	325.3	0.470133	691.174	0.109514	0.400697	0.000534692	0.219899	168079	39.6602	Luonan County	Shangluo City
2014	96	0.348811	0.08416	46	11.0041	0.0024902	243928	2.15587	179.766	350.424	0.468689	693.304	0.125506	0.392947	0.000564405	0.223936	142081	36.9335	Luonan County	Shangluo City
2015	96	0.454488	0.097199	46	11.0367	0.00249252	266941	2.465	1894.73	400.671	0.467487	695.087	0.10893	0.34267	0.000469131	0.247106	162334	34.7802	Luonan County	Shangluo City
2016	96	0.55744	0.124879	46.33	11.3241	0.00238848	268070	2.95572	1964.29	483.039	0.466844	691.086	0.102824	0.275593	0.000468486	0.24781	164437	48.698	Luonan County	Shangluo City
2017	96	0.582561	0.128871	44.96	11.2514	0.00268517	283434	3.12823	2527.01	496.979	0.465072	714.858	0.105043	0.297061	0.000466708	0.248414	159840	48.047	Luonan County	Shangluo City
2018	96	0.616931	0.142609	44.94	10.9252	0.00235555	315306	3.35674	3089.74	524.936	0.463342	717.846	0.116305	0.308882	0.00049597	0.248937	123812	34.847	Luonan County	Shangluo City
2019	96	0.723858	0.168729	44.92	11.235	0.00255453	378919	2.63894	3652.46	418.873	0.461625	720.837	0.0993638	0.421737	0.000525015	0.249394	120869	34.708	Luonan County	Shangluo City
2020	96	0.784742	0.205668	36.75	11.0115	0.00251934	388746	3.7526	3791.92	487.307	0.45992	884.354	0.0482421	0.135347	0.000184615	0.249797	117926	34.569	Luonan County	Shangluo City
2021	96	0.544893	0.14266	28.58	11.1762	0.00355431	362289	4.86626	4341.68	233.463	1.21455	430.616	0.076794	0.379137	0.00138133	0.250155	114983	34.43	Luonan County	Shangluo City
2012	97	0.318283	0.082441	47	10.9798	0.00241312	197743	1.71872	549.666	228.515	0.16139	510.66	0.0794845	0.350187	0.000749969	0.221092	110726	32.7535	Shanyang County	Shangluo City
2013	97	0.289691	0.062815	47	12.7029	0.00188247	221761	2.32128	1868.86	270.184	0.161377	510.702	0.0794155	0.31478	0.000791568	0.22799	111477	30.7402	Shanyang County	Shangluo City
2014	97	0.46782	0.118645	47	11.961	0.00232673	252670	2.21383	1948.46	294.342	0.161451	510.468	0.102106	0.317626	0.000791931	0.231908	86812	28.8268	Shanyang County	Shangluo City
2015	97	0.52322	0.126032	47	12.0554	0.00216595	282617	2.58852	217.189	343.14	0.161565	510.106	0.0869827	0.274679	0.000500521	0.252452	101365	27.5668	Shanyang County	Shangluo City
2016	97	0.541445	0.127676	46.9	12.5321	0.00215379	317339	3.77825	211.168	408.345	0.161592	511.109	0.0874131	0.220172	0.000500605	0.252735	102559	36.738	Shanyang County	Shangluo City
2017	97	0.487037	0.089742	42.83	12.2435	0.00293676	338560	3.45442	1515.08	418.537	0.161639	559.514	0.0794698	0.234885	0.000500751	0.252978	107437	35.962	Shanyang County	Shangluo City
2018	97	0.585981	0.134362	42.81	11.9783	0.00230164	383229	3.57182	2819	432.47	0.161639	559.776	0.0958479	0.246746	0.000500751	0.25319	85740	27.461	Shanyang County	Shangluo City
2019	97	0.694065	0.16741	42.79	12.1559	0.00224794	520929	3.37284	4122.92	408.272	0.161639	560.037	0.0946003	0.28195	0.000500751	0.253375	85264	27.837	Shanyang County	Shangluo City
2020	97	0.776503	0.192885	36.18	12.0596	0.00251385	456509	4.74772	4365.39	485.853	0.161639	662.355	0.0978794	0.109357	0.00054248	0.253539	84788	28.213	Shanyang County	Shangluo City
2021	97	0.371758	0.082852	29.57	12.0298	0.00359318	390366	6.1226	1167.69	149.448	0.179588	729.422	0.0677128	0.377967	0.000278177	0.253685	84312	28.589	Shanyang County	Shangluo City
2012	98	0.20473	0.050574	31	10.971	0.00219067	156801	2.74194	1456.95	255.25	0.204086	393.065	0.0879328	0.33273	0.000492409	0.212408	65152	21.1268	Danfeng County	Shangluo City
2013	98	0.101309	0.023836	31	12.7101	0.00176007	173955	2.36129	56.2644	300.246	0.204455	392.355	0.0848646	0.286654	0.000739949	0.216602	65304	20.0201	Danfeng County	Shangluo City
2014	98	0.382507	0.100232	31	11.9498	0.00227267	195950	2.54645	529.148	323.79	0.204455	392.355	0.10508	0.276228	0.000739949	0.219321	51142	19.0601	Danfeng County	Shangluo City
2015	98	0.454062	0.121457	31	12.0005	0.0021508	208279	2.79586	553.527	355.496	0.20569	390	0.0882441	0.256153	0.000413565	0.246259	60140	18.5801	Danfeng County	Shangluo City
2016	98	0.394541	0.09505	31.47	12.4545	0.0021766	205532	3.89692	568.864	398.811	0.205215	385.065	0.0853838	0.218053	0.000412609	0.245952	61124	21.396	Danfeng County	Shangluo City
2017	98	0.40959	0.094386	29.97	12.246	0.0027953	230975	3.34938	440.086	406.272	0.206219	402.369	0.0848178	0.232281	0.000414628	0.24569	60907	21.074	Danfeng County	Shangluo City
2018	98	0.433603	0.093856	29.96	11.9184	0.00218625	270065	3.27163	311.309	402.043	0.206304	402.336	0.0960018	0.253148	0.0004148	0.245464	54374	19.095	Danfeng County	Shangluo City
2019	98	0.468919	0.108931	29.93	12.2242	0.0021966	387695	2.97176	182.531	364.82	0.20639	402.573	0.0995489	0.299282	0.000414972	0.245265	52979	18.348	Danfeng County	Shangluo City
2020	98	0.54194	0.129015	24.84	12.0955	0.00241782	343039	4.61594	113.639	408.175	0.206476	484.863	0.101756	0.202796	0.000498173	0.245091	51584	17.601	Danfeng County	Shangluo City
2021	98	0.491692	0.126523	19.75	12.1019	0.00330944	288395	6.26012	8553.44	194.381	0.175114	719.038	0.10574	0.458175	0.000492923	0.244936	50189	16.854	Danfeng County	Shangluo City
2012	99	0.164171	0.042085	24	12.2644	0.00223363	151406	2.24667	176.558	233.723	0.2605	589.708	0.0869065	0.422823	0.000565251	0.216086	61733	12.6134	Shangnan County	Shangluo City
2013	99	0.169106	0.043874	25	13.9388	0.00195846	163344	2.5356	3711.83	274.772	0.260776	565.52	0.0846228	0.356558	0.000707314	0.222942	62560	11.6667	Shangnan County	Shangluo City
2014	99	0.29113	0.075607	25	13.2444	0.002304	180405	2.7568	3893.56	298.743	0.260998	565.04	0.102773	0.346548	0.000707914	0.22558	49332	10.9601	Shangnan County	Shangluo City
2015	99	0.325924	0.084601	25	13.1962	0.00221637	204575	3.524	472.828	330.776	0.262634	561.52	0.0891082	0.323766	0.000569882	0.249734	56538	10.5601	Shangnan County	Shangluo City
2016	99	0.381891	0.100791	24.79	13.8033	0.00221383	203095	3.53126	4221.66	379.454	0.26185	567.971	0.0865598	0.273598	0.000568182	0.250334	57209	20.346	Shangnan County	Shangluo City
2017	99	0.360764	0.088889	22.55	13.5788	0.00298611	220051	3.89812	3089.2	381.026	0.261053	626.297	0.0823747	0.290407	0.000566452	0.250848	58938	20.716	Shangnan County	Shangluo City
2018	99	0.384465	0.095036	22.54	13.2159	0.00231814	249558	4.55679	1956.75	396.251	0.261572	625.333	0.154391	0.296496	0.000567577	0.251291	29095	10.342	Shangnan County	Shangluo City
2019	99	0.442186	0.095412	22.55	13.542	0.00250591	302595	3.61116	824.286	352.962	0.262092	623.814	0.133702	0.352222	0.000568707	0.251678	30882	10.864	Shangnan County	Shangluo City
2020	99	0.51311	0.101928	20.48	13.3217	0.00271506	284617	4.59258	8366.94	407.698	0.262615	685.498	0.271175	0.224099	0.00113968	0.252018	32669	11.386	Shangnan County	Shangluo City
2021	99	0.740635	0.166295	18.41	13.3166	0.00336844	267249	5.574	3269.43	248.678	0.15358	1303.97	0.246024	0.363246	0.000541531	0.25232	34456	11.908	Shangnan County	Shangluo City
2012	100	0.185449	0.047151	30	10.8921	0.002966	165662	2.26333	491.461	189.819	0.410058	718.633	0.0935655	0.32708	0.000602996	0.21659	92502	32.631	Zhen’an County	Shangluo City
2013	100	0.181636	0.048758	30	12.533	0.00226962	179351	2.58333	1415.52	222.254	0.409545	719.533	0.0929407	0.270795	0.000694895	0.221483	92941	32.391	Zhen’an County	Shangluo City
2014	100	0.297435	0.05779	30	11.7389	0.00277792	200995	2.797	152.183	240.637	0.402552	732.033	0.107442	0.255969	0.000683029	0.225173	75641	32.467	Zhen’an County	Shangluo City
2015	100	0.388267	0.095614	30	11.9328	0.00260473	214935	2.993	1566.57	257.499	0.403692	729.967	0.0951358	0.244217	0.00054797	0.249662	86613	33.692	Zhen’an County	Shangluo City
2016	100	0.417742	0.099454	30.47	12.2666	0.00229176	234659	3.47883	1623.34	303.986	0.406532	713.686	0.0926217	0.205891	0.000597811	0.24867	87690	33.625	Zhen’an County	Shangluo City
2017	100	0.479537	0.105896	28.01	11.9814	0.00321994	248095	3.96998	1211.11	318.896	0.408014	773.545	0.0916748	0.21575	0.000599991	0.247822	89283	34.148	Zhen’an County	Shangluo City
2018	100	0.533455	0.124312	28	11.7511	0.00280197	300157	3.78893	798.878	303.599	0.412315	765.75	0.108913	0.247088	0.000606315	0.247088	73279	29.154	Zhen’an County	Shangluo City
2019	100	0.620951	0.151113	27.98	11.7743	0.00290278	184795	3.1474	386.649	252.549	0.416707	758.22	0.114243	0.321639	0.000612774	0.246447	70928	28.055	Zhen’an County	Shangluo City
2020	100	0.69794	0.170367	25.5	11.7461	0.00305345	351628	3.93118	3216.39	287.405	0.421194	823.098	0.0741356	0.093117	0.000333508	0.245881	68577	26.956	Zhen’an County	Shangluo City
2021	100	0.5899	0.13035	23.02	11.8797	0.00446115	331255	4.71495	597.38	146.474	1.04238	368.419	0.0782623	0.214774	0.000825374	0.245379	66226	25.857	Zhen’an County	Shangluo City
2012	101	0.143001	0.036637	17	9.82866	0.00275606	120330	3.58529	6294.79	267.677	0.18788	498.882	0.126237	0.191175	0.000825374	0.212951	41842	12.4534	Zhashui County	Shangluo City
2013	101	0.193044	0.04553	16	11.5639	0.00219938	130799	4.1125	2164.3	281.862	0.18788	530.062	0.116063	0.196323	0.000825374	0.219967	42253	12.1801	Zhashui County	Shangluo City
2014	101	0.349098	0.084846	16	10.7116	0.00277124	134277	4.13562	2234.54	283.748	0.18788	530.062	0.13165	0.19849	0.000825374	0.22407	35792	12.0667	Zhashui County	Shangluo City
2015	101	0.471865	0.111885	16	10.9207	0.0027645	146775	4.67438	233.133	320.712	0.183848	541.688	0.114639	0.186223	0.000576901	0.247002	40946	12.1001	Zhashui County	Shangluo City
2016	101	0.575334	0.140415	16.37	11.1472	0.0024552	175435	4.5833	2431.27	321.527	0.183488	530.483	0.108661	0.175415	0.000575772	0.247681	41450	13.135	Zhashui County	Shangluo City
2017	101	0.624987	0.152942	15.72	10.9634	0.00311806	176416	4.74325	3181.22	319.726	0.183341	552.863	0.105966	0.203132	0.000575308	0.248263	42561	13.033	Zhashui County	Shangluo City
2018	101	0.627409	0.144677	15.71	10.6871	0.00276014	180294	5.32973	3931.17	359.048	0.183319	553.278	0.101042	0.204686	0.000575242	0.248767	43843	14.085	Zhashui County	Shangluo City
2019	101	0.748546	0.182198	15.71	10.8293	0.00288312	232062	4.87256	4681.12	328.216	0.183298	553.342	0.11089	0.249952	0.000575175	0.249209	39228	12.49	Zhashui County	Shangluo City
2020	101	0.797668	0.186185	13.84	10.7198	0.00288573	220381	7.28179	4881.84	417.11	0.183277	628.179	0.126195	0.196691	0.000575109	0.249599	34613	10.895	Zhashui County	Shangluo City
2021	101	0.873989	0.206239	11.97	10.9271	0.0044311	213100	9.69102	7431.12	417.11	0.183256	726.399	0.145543	0.196612	0.000575043	0.249946	29998	9.3	Zhashui County	Shangluo City

## Sheet: Northern Shaanxi
Year	id	Y	Total population at the end of the year(10,000 people)	Average annual temperature（℃）	Average annual precipitation	Local budget expenditures(10,000 yuan)	Population productivity (million yuan/person)	Effective irrigated area(ha)	Regional economic density(million yuan/square kilometer)	Protection Rate of Permanent Basic Farmland	Cultivated land area per capital (ha/million people)	Fertilizer Application Intensity	Proportion of Gross Output Value of Farming, Forestry, Animal Husbandry and Fishery	Total Mechanical Power per Unit Cultivated Land	Proportion of Per Capita Disposable Income of Rural Residents	Total Grain Output	Sown Area of Grain Crops	xian	County/District	Y2
2012	33	0.377647	45	8.08605	0.00164227	678458	22.3867	4787.56	1314.85	0.154627	1462.13	0.0744636	0.0204528	0.000440756	0.299548	121133	127.589	Shenmu City	Yulin City	0.072264
2013	33	0.401803	43	9.43732	0.00174477	633924	21.5242	5426.86	1212.23	0.225309	1050.12	0.0708646	0.0231847	0.000642232	0.305251	123983	95.596	Shenmu City	Yulin City	0.088764
2014	33	0.487093	44	9.59744	0.00109834	388726	22.5455	5349.76	1268.16	0.209882	1101.68	0.0689005	0.0222626	0.000825185	0.294644	124121	63.603	Shenmu City	Yulin City	0.104467
2015	33	0.523244	44	9.74809	0.00121556	365829	18.5775	5291.93	1070.61	0.124291	1860.34	0.0677571	0.0342769	0.000500886	0.297461	122762	31.61	Shenmu City	Yulin City	0.111106
2016	33	0.537484	44.31	9.2909	0.00169724	773612	2.41977	5349.57	1185.07	0.124086	1850.37	0.0645347	0.0267975	0.000292719	0.297626	125266	38.2996	Shenmu City	Yulin City	0.109567
2017	33	0.592305	47.12	9.68297	0.00161777	871336	23.5639	3727	1454.26	0.123857	1743.25	0.0604199	0.0325969	0.000316525	0.297771	129924	32.376	Shenmu City	Yulin City	0.148248
2018	33	0.589366	48.5	9.21597	0.00163353	1057700	26.7636	2104.43	1700.1	0.123651	1696.47	0.0305985	0.0316581	0.000121538	0.297899	248901	64.369	Shenmu City	Yulin City	0.167779
2019	33	0.640223	48.78	9.72722	0.00128882	1337864	27.9393	481.857	1785.04	0.122798	1698.44	0.0490417	0.0337469	0.00033796	0.298014	253621	67.644	Shenmu City	Yulin City	0.179094
2020	33	0.710178	57.3	9.4701	0.00105407	1246227	22.583	491.145	1694.83	0.121958	1455.86	0.0668109	0.0393296	0.00055142	0.298116	258341	67.061	Shenmu City	Yulin City	0.174904
2021	33	0.388041	65.82	10.0294	0.0010808	1336700	17.2266	4942.8	2420.65	0.121129	1276.09	0.192142	0.0174365	0.000416706	0.298209	263061	66.478	Shenmu City	Yulin City	0.086071
2012	34	0.218247	54.57	8.27353	0.00144163	314069	7.35916	5527.42	568.68	0.634872	792.652	0.0880652	0.0896587	0.000878511	0.277251	243070	43.945	Yuyang District	Yulin City	0.031252
2013	34	0.249051	55.41	9.61518	0.00160588	335598	8.32449	6189.8	653.991	0.516502	959.538	0.0972768	0.0857677	0.000808757	0.28047	237364	44.21	Yuyang District	Yulin City	0.057256
2014	34	0.4322	55.54	9.68426	0.000986223	405025	9.15682	612.961	721.069	0.433042	1141.79	0.0998252	0.0845573	0.000756919	0.28204	239639	44.691	Yuyang District	Yulin City	0.105992
2015	34	0.427312	57	9.82713	0.00116617	409384	9.52872	581.867	770.027	0.422035	1141.56	0.104512	0.0818439	0.000753047	0.274517	218894	44.696	Yuyang District	Yulin City	0.093918
2016	34	0.392254	58.48	9.4008	0.00144408	450187	9.51984	5941.52	789.338	0.431037	1089.43	0.0955543	0.0905182	0.000580757	0.27655	239738	44.773	Yuyang District	Yulin City	0.076072
2017	34	0.454136	66.2	9.69896	0.00150829	524548	1.55963	6406.26	990.316	0.355593	1166.57	0.0945742	0.073317	0.000505005	0.278318	242138	45.711	Yuyang District	Yulin City	0.099072
2018	34	0.519484	68.48	9.29324	0.00151263	639406	11.3547	6871	1102.06	0.333633	1201.96	0.0847716	0.0834864	0.000510266	0.27987	449443	78.22	Yuyang District	Yulin City	0.121102
2019	34	0.56689	68.87	9.73712	0.00123656	766658	13.6738	7335.74	1328.71	0.331872	1201.5	0.0834767	0.0761903	0.000519656	0.281242	451707	78.118	Yuyang District	Yulin City	0.107429
2020	34	0.6088	96.8	9.47624	0.000898383	826511	1.34112	751.888	1419.28	0.323166	877.851	0.0821947	0.0778303	0.000517793	0.282465	453971	76.993	Yuyang District	Yulin City	0.108201
2021	34	0.643884	124.73	10.213	0.00095284	886364	10.9915	7598.4	1509.85	0.314906	699.15	0.0809254	0.0792735	0.000516025	0.283561	456235	75.868	Yuyang District	Yulin City	0.115431
2012	35	0.124196	37	8.9049	0.00147736	198881	2.81676	3326.72	243.391	0.160946	2417.14	0.098159	0.19736	0.000268354	0.247325	152742	22.156	Hengshan District	Yulin City	0.019111
2013	35	0.408067	37	10.2849	0.0018816	213308	3.29324	3724.24	284.563	0.24162	1610.08	0.0755557	0.190744	0.000419653	0.247504	156732	30.41	Hengshan District	Yulin City	0.0678
2014	35	0.421807	37	10.0795	0.00122946	196305	3.67818	3582.85	317.819	0.23653	1644.73	0.0751924	0.18117	0.00046011	0.243949	158008	38.664	Hengshan District	Yulin City	0.08864
2015	35	0.473526	38	10.3556	0.00127131	264716	3.66526	3598.43	272.092	0.237451	1595.24	0.0762436	0.213449	0.000478398	0.273658	156000	46.918	Hengshan District	Yulin City	0.089808
2016	35	0.496296	37.9	10.025	0.00151092	234524	3.19683	3678.13	279.622	0.237436	1599.55	0.0720103	0.0922186	0.000280422	0.27349	167004	55.172	Hengshan District	Yulin City	0.094751
2017	35	0.539739	31.25	10.3097	0.00151077	285500	4.94272	3949.61	356.474	0.220066	2093.06	0.0691692	0.185673	0.000290484	0.273346	176943	63.426	Hengshan District	Yulin City	0.127914
2018	35	0.695758	31.35	10.0042	0.00144829	324262	6.42743	4221.09	437.203	0.176846	2596.27	0.0465862	0.222999	0.000331724	0.27322	266817	71.68	Hengshan District	Yulin City	0.17852
2019	35	0.714387	31.64	10.3193	0.00130197	361200	6.36757	4492.56	464.967	0.177016	2570.01	0.0467196	0.235666	0.000270553	0.273109	267297	72.3935	Hengshan District	Yulin City	0.161332
2020	35	0.682817	28.4	9.93352	0.00106971	430990	7.22274	4582.64	460.26	0.176866	2865.63	0.0468524	0.264324	0.000208886	0.273011	267777	73.107	Hengshan District	Yulin City	0.144144
2021	35	0.706616	25.16	10.7608	0.00106734	443600	8.07791	4618.74	631.133	0.176716	3237.4	0.0469848	0.211902	0.000147324	0.272923	268257	71.906	Hengshan District	Yulin City	0.126956
2012	36	0.331128	35	7.97807	0.00163522	282473	9.58571	276.475	623.133	0.22678	2329.2	0.0382695	0.100163	0.000551998	0.284862	229713	51.363	Jingbian County	Yulin City	0.059441
2013	36	0.420833	34	9.36654	0.00200002	313204	1.35765	2424.67	692.138	0.230651	2357.47	0.0366028	0.099645	0.000586371	0.296504	231758	51.675	Jingbian County	Yulin City	0.094559
2014	36	0.509046	34	8.85718	0.00142043	327688	1.74882	2532.39	717.748	0.230651	2357.47	0.0374419	0.0973655	0.000686179	0.28269	237461	51.863	Jingbian County	Yulin City	0.113485
2015	36	0.433542	35	9.16886	0.00132933	331043	7.624	2542.8	524.45	0.217006	2434.11	0.0399223	0.149877	0.000680799	0.27213	215168	49.713	Jingbian County	Yulin City	0.080187
2016	36	0.458794	35.6	9.04662	0.0013285	311727	6.88338	267.839	481.407	0.215596	2408.74	0.0510962	0.168585	0.000524775	0.273995	235810	49.44	Jingbian County	Yulin City	0.085729
2017	36	0.605991	37.73	9.25178	0.00156454	328200	8.54864	286.511	597.307	0.215511	2273.65	0.0655019	0.174286	0.000547881	0.275631	255321	53.448	Jingbian County	Yulin City	0.141023
2018	36	0.624848	38.2	8.96891	0.0014352	383500	7.75484	305.182	582.223	0.215473	2246.07	0.0368166	0.190142	0.000244755	0.277079	328656	69.374	Jingbian County	Yulin City	0.146774
2019	36	0.740601	38.41	9.18356	0.00140629	440129	1.14972	323.854	766.216	0.215388	2234.68	0.0380231	0.1531	0.000629121	0.278369	319516	69.343	Jingbian County	Yulin City	0.192432
2020	36	0.815335	38.9	8.70688	0.00119533	365296	9.349	3271.57	714.091	0.215302	2207.4	0.0393007	0.173521	0.00101318	0.279526	310376	68.363	Jingbian County	Yulin City	0.218211
2021	36	0.329307	39.39	9.61652	0.00123579	290463	17.5483	33.8155	884.478	0.215217	2180.81	0.0922333	0.0554939	0.000512212	0.280568	301236	67.383	Jingbian County	Yulin City	0.060026
2012	37	0.348566	34	7.77261	0.00137381	277248	8.55912	1192.44	420.535	0.159169	3945.94	0.106807	0.100775	0.000372684	0.273049	282210	110.226	Dingbian County	Yulin City	0.086189
2013	37	0.359755	34	9.12316	0.0015928	303420	9.12	1391.78	448.092	0.15601	4025.82	0.110624	0.104334	0.000409123	0.276224	293789	110.899	Dingbian County	Yulin City	0.084837
2014	37	0.470013	35	8.49677	0.00138729	327717	9.66829	1448.36	489.003	0.153712	3969.29	0.101128	0.0955179	0.000439086	0.276766	298472	111.142	Dingbian County	Yulin City	0.111069
2015	37	0.419674	35	8.79893	0.00126794	343155	7.36857	1460	372.298	0.1396	4370.51	0.110445	0.137727	0.000411851	0.274378	270551	110.857	Dingbian County	Yulin City	0.104086
2016	37	0.478097	35.21	8.84246	0.00108153	323574	6.53387	1499.97	332.413	0.132224	4586.82	0.0983286	0.157855	0.000284826	0.276257	298428	110.652	Dingbian County	Yulin City	0.111428
2017	37	0.563872	33.37	8.92475	0.00135971	395335	7.65118	1624.54	368.96	0.100479	6368.77	0.117145	0.185031	0.000249381	0.277901	292126	110.842	Dingbian County	Yulin City	0.124846
2018	37	0.648248	33.94	8.71257	0.00138186	413553	9.34838	1749.11	458.503	0.100008	6291.28	0.0912586	0.154032	0.000234164	0.279351	375044	165.68	Dingbian County	Yulin City	0.153976
2019	37	0.683832	34.21	8.75357	0.00131347	447296	9.28439	1873.68	458.987	0.100008	6241.63	0.0909871	0.159001	0.000280996	0.280639	374273	165.427	Dingbian County	Yulin City	0.160644
2020	37	0.736161	33.9	8.37262	0.0011208	386410	7.76283	193.262	380.289	0.100008	6298.7	0.0907144	0.198098	0.000327829	0.281792	373502	163.196	Dingbian County	Yulin City	0.178076
2021	37	0.376176	33.59	9.24545	0.00112742	483539	6.24127	1964.64	493.809	0.100008	6356.83	0.0396318	0.0429515	6.55658e-05	0.282829	372731	160.965	Dingbian County	Yulin City	0.077355
2012	38	0.319249	26	7.99456	0.00168542	290961	17.3277	2994.15	1395.23	0.113424	1598.35	0.0892254	0.019169	0.000770027	0.288333	68411	30.667	Fugu County	Yulin City	0.051065
2013	38	0.3579	25	9.37191	0.00179398	324728	17.4152	3443.25	1348.34	0.108959	1730.4	0.0930404	0.0212768	0.000739713	0.299611	65176	30.762	Fugu County	Yulin City	0.077782
2014	38	0.447885	25	9.49197	0.00118278	317826	17.4612	3435.52	1351.9	0.108952	1730.52	0.0901598	0.0231842	0.000739662	0.290609	67214	30.716	Fugu County	Yulin City	0.114004
2015	38	0.353558	25	9.60517	0.00128772	252244	15.354	3458.36	1188.48	0.108952	1730.52	0.171977	0.0261432	0.000785891	0.2767	32388	30.321	Fugu County	Yulin City	0.077444
2016	38	0.280937	24.78	9.23949	0.00185097	283489	15.8422	3543.36	1215.76	0.108952	1745.88	0.125019	0.0606763	0.000531632	0.276883	58391	29.961	Fugu County	Yulin City	0.074223
2017	38	0.353992	26.89	9.71876	0.00147927	364647	18.5987	2506.88	1517.12	0.108952	1608.89	0.11401	0.0241923	0.000531632	0.277045	60521	28.941	Fugu County	Yulin City	0.080752
2018	38	0.460245	27.15	9.27645	0.00163761	468115	19.8739	1470.41	1542.53	0.108952	1593.48	0.0843965	0.0288474	0.000554747	0.277188	69446	30.194	Fugu County	Yulin City	0.109826
2019	38	0.553312	27.28	9.67182	0.00131216	516258	22.6359	433.935	1929.1	0.108952	1585.89	0.0777648	0.0272912	0.000554747	0.277316	69453	29.206	Fugu County	Yulin City	0.122649
2020	38	0.60759	25.6	9.39423	0.00107738	428529	22.7659	442.528	1820.7	0.108952	1689.96	0.0711345	0.0311246	0.000554747	0.277432	69460	28.989	Fugu County	Yulin City	0.135472
2021	38	0.706312	23.92	9.85813	0.00118106	554238	22.8959	4458.99	2298.92	0.108952	1808.65	0.0645054	0.0263991	0.000554747	0.277536	69467	28.772	Fugu County	Yulin City	0.148295
2012	39	0.212276	26	9.19761	0.00161677	157239	1.22538	2742.47	157.023	0.127906	1663.96	0.259211	0.463773	0.000254259	0.230338	70730	24.562	Jia County	Yulin City	0.053314
2013	39	0.32443	27	10.6988	0.00192711	171363	1.35475	3228.35	180.187	0.179441	1142.15	0.0464828	0.425432	0.00038913	0.233518	72629	24.734	Jia County	Yulin City	0.06642
2014	39	0.419571	27	10.5732	0.00121379	176687	1.53593	3392.32	204.386	0.179406	1142.37	0.0533161	0.366096	0.000453897	0.236121	76731	24.908	Jia County	Yulin City	0.091933
2015	39	0.411442	27	10.8559	0.00146441	178702	1.27556	3583.22	169.739	0.179406	1142.37	0.0550775	0.513836	0.000518739	0.258197	75530	24.265	Jia County	Yulin City	0.090843
2016	39	0.460575	26.95	10.4385	0.0017303	206511	1.47689	3663.12	196.156	0.16474	1246.38	0.0455897	0.468786	0.000357249	0.257313	76662	25.685	Jia County	Yulin City	0.11421
2017	39	0.627493	17.83	10.795	0.00174523	234515	2.83287	3933.35	248.94	0.0940962	3298.26	0.0361293	0.573645	0.000221058	0.256566	87436	25.277	Jia County	Yulin City	0.164441
2018	39	0.74877	15.55	10.5093	0.00164867	264676	3.53174	4203.58	270.668	0.103618	3434.34	0.0161936	0.559186	0.000280878	0.255927	197980	57.266	Jia County	Yulin City	0.166091
2019	39	0.768933	15.08	10.96	0.00124651	301031	3.81893	4473.81	283.832	0.103616	3541.45	0.0163209	0.563377	0.000280873	0.255373	198396	57.426	Jia County	Yulin City	0.167772
2020	39	0.888129	11.4	10.4801	0.00132955	295237	5.55554	457.743	312.14	0.103614	4684.74	0.0164477	0.539677	0.000280867	0.254889	198812	56.963	Jia County	Yulin City	0.169452
2021	39	0.445457	7.72	11.0424	0.00124925	296331	7.29216	4613.48	353.622	0.103612	6918.01	0.00477844	0.0482523	0.000131069	0.254462	199228	56.5	Jia County	Yulin City	0.066463
2012	40	0.105316	8	10.0827	0.00159845	83721	1.72125	286.653	329.426	0.110022	1015	0.0537344	0.264975	0.000862069	0.229702	17754	5.497	Wubu County	Yulin City	0.024351
2013	40	0.132902	9	11.7369	0.00177481	102286	1.77667	3319.24	382.536	0.110117	901.444	0.0524497	0.244734	0.000862813	0.231785	18227	5.537	Wubu County	Yulin City	0.033381
2014	40	0.240918	9	11.3361	0.0014178	105906	1.97778	3339.69	425.837	0.11028	900.111	0.050861	0.21436	0.000864091	0.234507	18816	5.576	Wubu County	Yulin City	0.050882
2015	40	0.256096	8	11.8416	0.00138442	109127	2.95	3356.79	400.957	0.110321	1012.25	0.0518418	0.302476	0.000987898	0.257491	18460	5.991	Wubu County	Yulin City	0.048786
2016	40	0.330914	8.43	11.4634	0.00162376	112210	2.13167	3433.68	429.904	0.110403	959.905	0.0406107	0.298169	0.000494315	0.257145	22925	6.891	Wubu County	Yulin City	0.076962
2017	40	0.493717	6.45	11.77	0.00174947	151524	3.23729	2303.58	499.522	0.110444	1254.11	0.035185	0.437174	0.000494499	0.256851	25778	6.782	Wubu County	Yulin City	0.13956
2018	40	0.630273	6.46	11.6597	0.00123656	170072	3.6234	1173.48	546.895	0.110608	1250.31	0.0163253	0.43647	0.00160951	0.256599	55558	12.169	Wubu County	Yulin City	0.150176
2019	40	0.635665	6.49	12.0545	0.00123216	169019	4.14681	43.3845	628.804	0.110717	1243.3	0.0162894	0.420053	0.000619655	0.256381	55619	12.19	Wubu County	Yulin City	0.160802
2020	40	0.695677	5.5	11.307	0.00143188	166123	5.22364	4486.71	679.601	0.110827	1465.64	0.0162536	0.433156	0.000744325	0.25619	55680	12.088	Wubu County	Yulin City	0.171428
2021	40	0.260119	4.51	11.8172	0.0014593	167011	6.30046	4623.35	743.147	0.110937	1785.59	0.065015	0.576872	0.00149013	0.256021	55741	11.986	Wubu County	Yulin City	0.065908
2012	41	0.463477	23	9.23297	0.00148495	140089	1.74435	3861.58	331.023	0.128851	1158.57	0.061327	0.233432	0.000525387	0.244696	83438	26.406	Mizhi County	Yulin City	0.122573
2013	41	0.133858	22	10.742	0.0019104	150672	2.12	4324.67	384.818	0.123246	1266.32	0.0613571	0.216263	0.000610216	0.244032	85418	26.587	Mizhi County	Yulin City	0.020778
2014	41	0.179215	22	10.4614	0.00129051	160277	2.21182	421.798	401.485	0.123219	1266.59	0.0594573	0.199501	0.000645972	0.243165	88080	26.783	Mizhi County	Yulin City	0.027518
2015	41	0.14735	22	10.8197	0.00144474	181670	1.88773	473.34	342.657	0.123219	1266.59	0.0599707	0.286289	0.000645972	0.26501	87426	28.837	Mizhi County	Yulin City	0.029828
2016	41	0.11963	22.33	10.4497	0.0017939	191770	2.86946	411.374	369.967	0.123215	1247.92	0.0523259	0.27628	0.000502404	0.264813	100218	29.832	Mizhi County	Yulin City	0.034835
2017	41	0.237717	15.58	10.7544	0.0016713	228513	3.88729	1726.78	396.04	0.123197	1788.83	0.0492799	0.349148	0.000538213	0.264645	106311	29.513	Mizhi County	Yulin City	0.063468
2018	41	0.29622	14.54	10.5326	0.00146727	270493	3.96114	3042.18	475.083	0.123197	1916.78	0.0391122	0.334337	0.000609975	0.264501	133897	34.501	Mizhi County	Yulin City	0.068613
2019	41	0.252535	14.42	10.9141	0.00124907	240560	4.54724	4357.58	541.017	0.123197	1932.73	0.0394434	0.331595	0.000538213	0.264375	133964	35.308	Mizhi County	Yulin City	0.064084
2020	41	0.247509	14.2	10.4467	0.0012715	251884	4.42746	4435.96	518.729	0.123197	1962.68	0.0397744	0.38548	0.000466451	0.264264	134031	34.988	Mizhi County	Yulin City	0.065608
2021	41	0.135962	13.98	11.0953	0.00121517	262109	4.30769	4461.79	578.135	0.123197	1993.56	0.248266	0.202228	0.000358809	0.264166	134098	34.668	Mizhi County	Yulin City	0.020433
2012	42	0.251389	37	9.61453	0.00156907	192100	1.28727	3294.47	256.989	0.0766518	843.919	0.168926	0.333333	0.000480384	0.225987	87932	25.486	Suide County	Yulin City	0.051879
2013	42	0.206796	37	11.1886	0.00184039	235100	1.45818	3865.11	291.149	0.0573598	1127.76	0.170869	0.318576	0.000383445	0.225665	87412	25.661	Suide County	Yulin City	0.043838
2014	42	0.201217	36	10.7687	0.00143324	236000	1.525	3882.99	291.905	0.0573406	1159.47	0.167006	0.310024	0.000431231	0.230752	89895	25.854	Suide County	Yulin City	0.039774
2015	42	0.222019	36	11.2707	0.00141778	235266	1.63528	3916.7	317.701	0.0573406	1159.47	0.178077	0.31249	0.000455188	0.250425	83902	27.974	Suide County	Yulin City	0.045548
2016	42	0.206289	35.95	10.9062	0.00169623	262600	1.86787	423.221	362.385	0.0555545	1198.41	0.164419	0.288867	0.000348165	0.250609	90981	28.05	Suide County	Yulin City	0.047917
2017	42	0.498844	28.64	11.1728	0.00172529	323800	2.64992	1947.28	409.444	0.0495303	1687.26	0.155947	0.441193	0.000351799	0.250766	95077	27.757	Suide County	Yulin City	0.114072
2018	42	0.721055	28.75	11.0653	0.00128526	419500	3.26865	3471.34	507.144	0.0456818	1822.4	0.0611195	0.378892	0.001107	0.250902	243294	53.061	Suide County	Yulin City	0.182757
2019	42	0.400382	28.63	11.4252	0.00126939	372000	3.16271	4995.39	488.658	0.0456722	1830.42	0.0600216	0.416777	0.000324397	0.25102	243829	53.209	Suide County	Yulin City	0.081049
2020	42	0.417318	25.6	10.8152	0.00136675	388000	3.91219	5117.67	540.486	0.0456626	2047.5	0.0589285	0.398106	0.000343407	0.251124	244364	52.788	Suide County	Yulin City	0.08468
2021	42	0.0929781	22.57	11.3886	0.0013997	441600	4.66166	518.257	599.95	0.0456531	2322.86	0.020388	0.0774332	0.000209816	0.251216	244899	52.367	Suide County	Yulin City	0.020431
2012	43	0.372532	32	9.40081	0.0014577	158170	1.255	7494.84	196.863	0.0880669	870.594	0.129423	0.388212	0.00035895	0.230551	110985	31.763	Zizhou County	Yulin City	0.092746
2013	43	0.0908521	32	10.9464	0.00184084	180774	1.5125	8621.75	237.255	0.0823611	930.906	0.139965	0.349087	0.000369264	0.232516	102361	32.057	Zizhou County	Yulin City	0.026901
2014	43	0.0617941	30	10.5051	0.00140129	176603	1.742	8187.62	255.926	0.0804834	1016.13	0.135442	0.31872	0.000426453	0.236232	105898	32.251	Zizhou County	Yulin City	0.006989
2015	43	0.131165	30	10.8963	0.0013278	196628	1.46767	8185.19	215.622	0.0805997	1014.67	0.203464	0.445169	0.00042707	0.260714	70489	33.103	Zizhou County	Yulin City	0.030874
2016	43	0.12987	30.37	10.6082	0.00166864	238781	1.83438	894.976	272.821	0.080194	1007.38	0.143093	0.380921	0.000326861	0.259838	101312	33.785	Zizhou County	Yulin City	0.03377
2017	43	0.287863	16.87	10.8652	0.0016138	267191	3.72433	873.058	305.877	0.0805125	1806.34	0.140022	0.450043	0.000328159	0.259096	104062	33.382	Zizhou County	Yulin City	0.072916
2018	43	0.31016	16.39	10.7116	0.00132625	294350	3.88239	851.141	311.618	0.080105	1868.7	0.0787905	0.456327	0.000457098	0.25846	183804	54.749	Zizhou County	Yulin City	0.077609
2019	43	0.24455	16.05	10.9878	0.00131654	327500	3.73583	829.223	293.634	0.080105	1908.29	0.0812134	0.499745	0.000326499	0.257909	177914	52.92	Zizhou County	Yulin City	0.062854
2020	43	0.282032	13.9	10.4379	0.00130143	294870	4.88779	731.466	332.666	0.080105	2203.45	0.0838023	0.454763	0.000195899	0.257426	172024	52.444	Zizhou County	Yulin City	0.07909
2021	43	0.289545	11.75	11.2177	0.00129951	292560	6.03976	6275.93	378.452	0.080105	2606.64	0.055702	0.233759	0.000946846	0.257	166134	51.968	Zizhou County	Yulin City	0.06003
2012	44	0.097256	22	9.96379	0.00154044	145274	1.39455	2583.52	163.105	0.0481329	2052.5	0.0628771	0.64545	0.000310043	0.230701	71759	28.059	Qingjian County	Yulin City	0.009911
2013	44	0.377228	22	11.5802	0.00183831	180040	1.61182	2966.45	188.517	0.0810381	1219.09	0.0740812	0.556041	0.00059657	0.233575	72893	28.237	Qingjian County	Yulin City	0.078371
2014	44	0.300285	22	11.0465	0.00151221	161229	1.8	2969.35	209.463	0.080266	1230.82	0.0693167	0.48647	0.000627816	0.235668	75119	28.44	Qingjian County	Yulin City	0.054081
2015	44	0.305165	22	11.5698	0.00134152	175256	1.866	2984.81	218.235	0.080263	1230.86	0.0630321	0.506244	0.000664722	0.259232	84449	30.233	Qingjian County	Yulin City	0.054631
2016	44	0.404815	21.7	11.3165	0.00144798	184055	2.23523	324.9	233.44	0.0802038	1248.8	0.0673153	0.494209	0.000479722	0.259418	79135	31.328	Qingjian County	Yulin City	0.09022
2017	44	0.577854	12.4	11.5203	0.00163755	213050	4.11935	1443.17	271.558	0.0795579	2203.15	0.0639739	0.598471	0.000512464	0.259577	83284	30.764	Qingjian County	Yulin City	0.133795
2018	44	0.290656	12.47	11.517	0.00109872	244227	4.69687	2561.44	311.377	0.0794271	2194.39	0.0464719	0.561487	0.000182722	0.259715	109012	34.689	Qingjian County	Yulin City	0.076596
2019	44	0.459332	12.56	11.8168	0.00131655	290166	4.88933	3679.72	326.475	0.0794242	2178.74	0.0464113	0.573241	0.000511602	0.259836	109219	34.786	Qingjian County	Yulin City	0.124943
2020	44	0.583478	11.6	11.0694	0.00147169	272086	5.43819	3758.76	340.989	0.0794213	2359.14	0.046351	0.594758	0.000840459	0.259942	109426	34.509	Qingjian County	Yulin City	0.132877
2021	44	0.395251	10.64	11.6387	0.00161112	271303	5.98705	3793.54	376.486	0.0794184	2572.09	0.131356	0.202149	0.000328863	0.260038	109633	34.232	Qingjian County	Yulin City	0.10239
2012	45	0.289557	46.48	9.38033	0.00176221	182449	4.37414	947.834	571.738	0.280593	640.017	0.0808333	0.0908066	0.000504236	0.226737	90198	17.719	Baota District	Yan’an City	0.061448
2013	45	0.310581	46.92	10.9949	0.00215993	216626	4.61573	655.378	609.027	0.257229	691.603	0.0855651	0.0914688	0.000493066	0.230344	85023	17.786	Baota District	Yan’an City	0.061734
2014	45	0.450413	46.49	10.2639	0.00177556	281407	5.23532	777.194	684.449	0.257769	696.537	0.082565	0.0882304	0.000524983	0.233057	89917	17.853	Baota District	Yan’an City	0.105066
2015	45	0.46804	47.23	10.7044	0.00139849	249721	5.74169	871.234	757.593	0.25738	686.661	0.0837523	0.0751867	0.000555025	0.233874	88917	17.92	Baota District	Yan’an City	0.111907
2016	45	0.284397	47.88	10.6469	0.00162032	286122	5.32853	977.219	717.463	0.257944	675.856	0.0819122	0.0839321	0.000247219	0.234871	90011	17.987	Baota District	Yan’an City	0.10781
2017	45	0.36088	49.18	10.8487	0.00158287	300380	5.92172	1145.46	818.982	0.267526	634.425	0.0783123	0.0761292	0.000256402	0.235734	92859	18.054	Baota District	Yan’an City	0.122237
2018	45	0.365275	49.08	10.6668	0.00134245	344659	6.72323	1313.71	925.056	0.26344	645.579	0.0987197	0.0844356	0.000252485	0.236489	72326	18.121	Baota District	Yan’an City	0.122181
2019	45	0.463776	49.71	10.8959	0.00150886	373232	7.3266	1481.95	1023.37	0.265535	632.368	0.0925108	0.081513	0.000286305	0.237155	73613	18.188	Baota District	Yan’an City	0.13956
2020	45	0.547259	64.1	10.2591	0.00174396	330878	5.74945	1499.98	1036.39	0.264458	492.403	0.0865154	0.0856127	0.000316827	0.237746	74900	18.255	Baota District	Yan’an City	0.156939
2021	45	0.520066	78.49	10.9538	0.00214308	288524	4.17231	1474.95	1049.41	0.26339	403.758	0.0807224	0.0896106	0.000347102	0.238275	76187	18.322	Baota District	Yan’an City	0.174318
2012	46	0.133461	28	9.08027	0.00167629	158537	2.66286	6796.62	311.185	0.192348	1136.39	0.0974126	0.153093	0.000377133	0.218024	77259	25.802	Zichang City	Yan’an City	0.040137
2013	46	0.192749	27	10.6385	0.00195208	168409	3.78889	4628.34	346.953	0.201525	1124.81	0.102179	0.151048	0.000395127	0.221366	75025	25.412	Zichang City	Yan’an City	0.073024
2014	46	0.349875	27	10.0766	0.001502	157032	3.44444	5422.35	338.564	0.198492	1142	0.106198	0.158989	0.000486476	0.222766	77657	25.475	Zichang City	Yan’an City	0.107273
2015	46	0.221399	27	10.4739	0.00135364	182700	2.67481	688.762	301.419	0.195768	1157.89	0.263093	0.160132	0.0004798	0.239284	31848	25.611	Zichang City	Yan’an City	0.077815
2016	46	0.375731	26.97	10.2752	0.00160246	182400	2.77976	6479.14	312.896	0.194166	1168.74	0.109956	0.171142	0.000317249	0.240648	75785	25.625	Zichang City	Yan’an City	0.09898
2017	46	0.570023	22.1	10.5262	0.00165109	200066	4.39774	7283.28	405.634	0.193883	1428.37	0.0493257	0.132554	0.000348465	0.241834	78154	25.628	Zichang City	Yan’an City	0.165518
2018	46	0.56667	22.07	10.3593	0.00130056	236101	5.19147	8087.42	478.196	0.193368	1434.12	0.0890171	0.108501	0.000284351	0.242874	42475	10.881	Zichang City	Yan’an City	0.217654
2019	46	0.64477	21.94	10.5699	0.00148309	269800	5.62215	8891.55	463.543	0.188213	1482.13	0.0860672	0.114497	0.000369026	0.243795	43071	3.866	Zichang City	Yan’an City	0.209423
2020	46	0.684159	21.77	9.99816	0.00148235	237243	4.59412	8641.31	417.421	0.187314	1500.87	0.0831978	0.129998	0.000459081	0.244616	43667	18.613	Zichang City	Yan’an City	0.185912
2021	46	0.853249	21.6	10.8172	0.00150827	286061	3.5661	8139.24	566.23	0.186424	1519.91	0.0804058	0.0979342	0.000548279	0.245352	44263	33.36	Zichang City	Yan’an City	0.215249
2012	47	0.199544	20	10.058	0.0015401	131695	4.119	5193.89	415.222	0.0549756	1649.3	0.0938446	0.101799	0.000212211	0.217172	43263	16.966	Yanchuan County	Yan’an City	0.086853
2013	47	0.212869	20	11.683	0.00203262	139296	4.728	3584.28	476.613	0.0730101	1241.9	0.101363	0.103096	0.000281826	0.217471	40054	16.966	Yanchuan County	Yan’an City	0.071648
2014	47	0.397763	20	11.0721	0.00158627	181568	5.85	4257.32	517.942	0.0731072	1240.25	0.0943791	0.109115	0.000443459	0.226374	43018	16.966	Yanchuan County	Yan’an City	0.118359
2015	47	0.327237	19	11.5449	0.00132435	188311	3.77368	4814.28	354.861	0.0731072	1305.53	0.151509	0.168693	0.000483773	0.241683	26797	16.966	Yanchuan County	Yan’an City	0.099829
2016	47	0.424265	19.08	11.4067	0.00140619	191282	3.56977	5345.57	343.123	0.0751274	1265.09	0.127743	0.196259	0.000497141	0.244055	31767	16.966	Yanchuan County	Yan’an City	0.127316
2017	47	0.44557	17.18	11.6165	0.00153222	196104	4.69441	3857.42	406.297	0.0765675	1378.58	0.127376	0.169473	0.000548894	0.246121	31780	16.966	Yanchuan County	Yan’an City	0.168829
2018	47	0.582512	17.15	11.5944	0.00107426	265055	6.66798	2369.27	576.099	0.0794734	1330.5	0.132107	0.14334	0.000482076	0.247936	28916	5.574	Yanchuan County	Yan’an City	0.171458
2019	47	0.626934	17.01	11.8036	0.0013777	261503	5.8458	881.117	500.942	0.0770883	1382.95	0.176719	0.170201	0.000552627	0.249543	30359	10.935	Yanchuan County	Yan’an City	0.161373
2020	47	0.687511	13.97	11.0598	0.00166613	272134	7.28561	8162.16	512.746	0.0772557	1680.24	0.217282	0.171515	0.000639032	0.250976	31802	11.0601	Yanchuan County	Yan’an City	0.183169
2021	47	0.766973	10.93	11.6437	0.00190282	230157	8.72543	84.2367	599.358	0.077424	2142.91	0.254324	0.151206	0.000725813	0.252261	33245	11.1851	Yanchuan County	Yan’an City	0.222138
2012	48	0.299978	16	10.0715	0.00158589	103868	2.13625	448.137	143.961	0.150907	1460.69	0.122166	0.375923	0.000385093	0.218042	38374	10.03	Yanchang County	Yan’an City	0.101224
2013	48	0.308893	16	11.6894	0.00228863	117890	2.35437	2831.27	159.079	0.213619	1031.88	0.138238	0.376576	0.000545124	0.221717	35598	10.329	Yanchang County	Yan’an City	0.062596
2014	48	0.471801	15	10.9966	0.00175658	136330	2.73933	342.862	173.522	0.21336	1102	0.128902	0.373923	0.000665457	0.224777	40077	10.423	Yanchang County	Yan’an City	0.122032
2015	48	0.420586	16	11.5233	0.00128124	137408	2.6875	3837.19	181.588	0.212845	1035.62	0.192656	0.354235	0.00066385	0.242566	27832	10.654	Yanchang County	Yan’an City	0.125395
2016	48	0.379474	15.6	11.4429	0.00151719	153477	2.42436	4297.63	159.713	0.212845	1062.18	0.203165	0.390529	0.0006035	0.241873	27047	10.806	Yanchang County	Yan’an City	0.134416
2017	48	0.431808	12.86	11.6262	0.00147324	196096	3.57625	5078.95	194.215	0.237226	1156.07	0.191128	0.328058	0.000672631	0.24127	30027	10.821	Yanchang County	Yan’an City	0.135798
2018	48	0.48699	12.85	11.6002	0.00117084	211222	4.28397	5860.28	228.37	0.239677	1145.14	0.278896	0.332788	0.000883452	0.24074	21603	15.398	Yanchang County	Yan’an City	0.127176
2019	48	0.526114	12.79	11.8098	0.00136876	213262	4.1337	6641.6	223.269	0.240773	1145.27	0.276659	0.35083	0.000750956	0.24027	23191	5.76	Yanchang County	Yan’an City	0.115674
2020	48	0.627853	11.8	11.0717	0.00178422	212126	4.58136	671.537	228.294	0.240987	1240.25	0.274708	0.353317	0.000614964	0.239851	24779	5.85336	Yanchang County	Yan’an City	0.104172
2021	48	0.739763	10.81	11.5652	0.00231623	213126	5.02901	6583.94	289.248	0.241201	1352.64	0.272993	0.286919	0.000478731	0.239475	26367	5.94672	Yanchang County	Yan’an City	0.100882
2012	49	0.161837	19	8.50387	0.00182013	173037	5.56579	875.397	358.596	0.398861	768.895	0.0636011	0.107133	0.000479157	0.2317	68568	33.87	Ansai District	Yan’an City	0.037171
2013	49	0.236566	19	10.0658	0.00209764	197082	5.49526	583.828	353.747	0.214226	1431.58	0.0689786	0.119833	0.000330882	0.235512	65687		Ansai District	Yan’an City	0.068146
2014	49	0.403377	19	9.39682	0.0016164	209096	5.62153	685.419	360.936	0.214226	1431.58	0.0657574	0.123288	0.000404412	0.239994	71490		Ansai District	Yan’an City	0.127044
2015	49	0.398873	20	9.77767	0.00141606	243080	4.855	7487.11	329.264	0.214226	1360	0.0700652	0.135559	0.000404412	0.259382	69521		Ansai District	Yan’an City	0.117035
2016	49	0.407476	19.7	9.71761	0.00154189	208527	3.89188	873.995	259.898	0.213755	1383.76	0.0738684	0.192228	0.000330154	0.2608	68243		Ansai District	Yan’an City	0.132093
2017	49	0.457945	17.79	9.88274	0.00162247	234000	5.13297	4674.61	309.596	0.213755	1532.32	0.0760242	0.173113	0.000330154	0.262036	68544		Ansai District	Yan’an City	0.153828
2018	49	0.531932	17.78	9.60555	0.00140564	200021	6.33712	8475.22	363.581	0.156458	2094.66	0.0974571	0.205801	0.000268507	0.263122	53285		Ansai District	Yan’an City	0.118241
2019	49	0.644308	17.76	9.8637	0.0016428	230403	6.45445	12275.8	388.711	0.14699	2232.09	0.094311	0.202583	0.000252258	0.264083	53981		Ansai District	Yan’an City	0.175661
2020	49	0.768951	16.31	9.34856	0.00155836	260931	6.82166	1241.34	377.282	0.147064	2429.31	0.0912449	0.219113	0.000252385	0.264941	54677		Ansai District	Yan’an City	0.177537
2021	49	0.896177	14.86	10.1322	0.0016783	266937	7.18888	12181.5	494.13	0.147138	2665.01	0.088256	0.175234	0.000252512	0.265711	55373		Ansai District	Yan’an City	0.1845
2012	50	0.267762	16	8.05747	0.00178556	235356	1.99875	2542.27	463.838	0.161361	2473.88	0.0481449	0.0410473	0.000328432	0.227896	55146	17.574	Zhidan County	Yan’an City	0.08394
2013	50	0.278404	16	9.57137	0.00219999	265512	1.49313	1754.85	442.514	0.301273	1325	0.0516568	0.0477354	0.000660377	0.228213	51455	17.993	Zhidan County	Yan’an City	0.076914
2014	50	0.412383	16	8.85279	0.00168309	283425	1.41375	293.562	439.167	0.301316	1324.81	0.0499812	0.051267	0.000707647	0.230417	53180	18.2	Zhidan County	Yan’an City	0.138408
2015	50	0.427458	16	9.21072	0.0014253	275173	8.38375	2363.34	354.774	0.261579	1526.06	0.049404	0.0693947	0.000614326	0.252315	54024	18.74	Zhidan County	Yan’an City	0.109762
2016	50	0.385001	16.09	9.26205	0.00146875	218000	6.68676	2398.13	284.554	0.231858	1712.06	0.0497805	0.0946305	0.000326714	0.252833	56488	19.814	Zhidan County	Yan’an City	0.113386
2017	50	0.495352	14.71	9.36679	0.00163225	211442	9.47886	2797.27	350.527	0.211581	2052.14	0.0495113	0.0759471	0.000298142	0.253287	56573	19.82	Zhidan County	Yan’an City	0.173021
2018	50	0.639987	14.69	9.04626	0.00162637	190700	1.29666	3196.42	395.308	0.211315	2057.52	0.0447374	0.092837	0.000297767	0.253689	70612	18.553	Zhidan County	Yan’an City	0.190483
2019	50	0.640015	14.58	9.30379	0.0015709	273895	11.8385	3595.56	425.809	0.20353	2152.33	0.0563929	0.0866371	0.000286798	0.254046	71587	18.659	Zhidan County	Yan’an City	0.154632
2020	50	0.698983	15.51	8.78721	0.00159663	274968	9.13475	3624.92	373.404	0.203446	2024.11	0.0677352	0.0993093	0.000286679	0.254367	72562	18.765	Zhidan County	Yan’an City	0.135194
2021	50	0.790131	16.44	9.55745	0.00171277	269247	6.43101	3548.17	517.695	0.203362	1910.4	0.0787767	0.0720001	0.00028656	0.254657	73537	18.871	Zhidan County	Yan’an City	0.139105
2012	51	0.173978	14	7.67131	0.00162446	283187	14.3621	6315.17	530.668	0.25781	2244.29	0.061897	0.0352514	0.00050923	0.230366	58662	16.6455	Wuqi County	Yan’an City	0.052916
2013	51	0.22013	14	9.10656	0.00206526	333299	14.9786	434.782	553.444	0.330359	1751.43	0.0608015	0.0376958	0.000734095	0.233692	56742	16.794	Wuqi County	Yan’an City	0.051345
2014	51	0.452741	14	8.3971	0.00158935	371574	15.1786	5162.39	558.221	0.325566	1777.21	0.053326	0.0394932	0.000723444	0.237809	62146	16.9425	Wuqi County	Yan’an City	0.151723
2015	51	0.410249	14	8.68968	0.0014036	316301	1.33571	5771.29	370.731	0.323163	1790.43	0.054401	0.0621229	0.000757999	0.254559	61065	17.091	Wuqi County	Yan’an City	0.105648
2016	51	0.425987	14.49	8.79873	0.00123933	248158	7.49827	6241.67	286.751	0.319833	1747.9	0.045316	0.0777478	0.000513286	0.255626	62318	17.2395	Wuqi County	Yan’an City	0.093884
2017	51	0.619239	15.21	8.84291	0.00161341	243006	8.89893	7220.48	357.286	0.319921	1664.69	0.0406313	0.0638414	0.000552923	0.256563	69380	17.388	Wuqi County	Yan’an City	0.174269
2018	51	0.712353	15.2	8.62441	0.00161175	220005	9.91234	8199.3	397.75	0.315781	1687.63	0.0407219	0.0712376	0.000545766	0.257392	68931	17.5365	Wuqi County	Yan’an City	0.236938
2019	51	0.768619	15.26	8.81927	0.00141774	283982	11.7126	9178.12	471.822	0.307532	1726.08	0.0475712	0.0626305	0.000569476	0.258131	70610	17.685	Wuqi County	Yan’an City	0.214464
2020	51	0.779542	14.62	8.24583	0.00140631	331822	1.26897	9261.71	396.337	0.304412	1820.11	0.0541023	0.0776261	0.000601278	0.258793	72289	17.8335	Wuqi County	Yan’an City	0.237945
2021	51	0.735609	13.98	9.16068	0.00137653	332593	9.17463	972.928	555.668	0.301354	1922.75	0.0603369	0.0575555	0.00063244	0.259391	73968	17.982	Wuqi County	Yan’an City	0.164203
2012	52	0.158969	9	9.06838	0.00183302	76656	2.27778	2391.48	90.2289	0.200869	3016.67	0.0839887	0.317015	0.000294659	0.249667	41577	8.994	Ganquan County	Yan’an City	0.05311
2013	52	0.209947	9	10.6374	0.00211678	89377	2.36667	1665.35	93.75	0.568914	1065.11	0.0862439	0.344225	0.00083455	0.25066	39597	9.266	Ganquan County	Yan’an City	0.065495
2014	52	0.355719	9	9.84833	0.00190699	91394	2.49333	1844.75	98.7676	0.57058	1062	0.0785585	0.348676	0.00094162	0.252476	42427	9.409	Ganquan County	Yan’an City	0.133319
2015	52	0.431941	9	10.2421	0.00149689	100134	2.42222	1922.92	95.1585	0.892571	678.889	0.084941	0.366267	0.001473	0.263778	43489	9.659	Ganquan County	Yan’an City	0.125885
2016	52	0.379421	8.95	10.273	0.0016684	105458	2.29944	2264.66	90.581	0.908026	671.061	0.0744602	0.394184	0.0011655	0.26233	49973	9.514	Ganquan County	Yan’an City	0.125263
2017	52	0.485234	7.97	10.4199	0.0016559	112724	2.93614	2620.87	102.993	0.905463	755.709	0.0791437	0.356056	0.00116221	0.261073	47180	9.511	Ganquan County	Yan’an City	0.143668
2018	52	0.568194	7.95	10.0753	0.00160387	69260	3.35268	2977.07	117.314	0.906969	756.352	0.0841643	0.328981	0.00116414	0.259971	44627	7.445	Ganquan County	Yan’an City	0.139049
2019	52	0.647301	7.91	10.4031	0.00171063	139003	3.67598	3333.28	127.98	0.90712	760.051	0.0860614	0.313096	0.00133067	0.258998	45270	7.711	Ganquan County	Yan’an City	0.124301
2020	52	0.700804	7.69	9.88786	0.00180518	150715	3.75313	3332.28	126.936	0.908178	780.884	0.0879054	0.327297	0.00149875	0.258131	45913	7.977	Ganquan County	Yan’an City	0.128255
2021	52	0.763261	7.47	10.5124	0.00226168	139193	3.83028	3233.77	145.551	0.909237	802.945	0.0896984	0.295577	0.00166722	0.257355	46556	8.243	Ganquan County	Yan’an City	0.151309
2012	53	0.163188	22	9.84516	0.00164686	127912	9.68364	1134.98	1188.84	0.84353	272.318	0.566945	0.160954	0.00417293	0.284846	94413	12.622	Luochuan County	Yan’an City	0.04309
2013	53	0.203699	23	11.4679	0.00182135	152218	1.75391	778.785	1380.25	0.449727	488.565	0.597514	0.151968	0.00249177	0.284846	94540	12.884	Luochuan County	Yan’an City	0.036406
2014	53	0.303783	22	10.6274	0.00191398	140935	1.43	926.567	1280.36	0.474203	484.409	0.619125	0.174423	0.00281505	0.288253	99282	12.815	Luochuan County	Yan’an City	0.061518
2015	53	0.299126	22	11.0043	0.00133565	174179	8.44	134.657	1035.04	0.482627	475.955	0.583275	0.194171	0.00305606	0.277456	99886	12.856	Luochuan County	Yan’an City	0.090753
2016	53	0.258513	22.52	11.0606	0.00180664	103771	6.73757	115.888	846.708	0.491307	456.75	0.578419	0.254621	0.00243049	0.281022	105975	12.827	Luochuan County	Yan’an City	0.086752
2017	53	0.337464	23.06	11.1621	0.00148992	226749	6.49523	656.901	835.826	0.49848	439.636	0.570087	0.258567	0.00256461	0.284138	105112	12.754	Luochuan County	Yan’an City	0.109777
2018	53	0.4111	23.01	10.8627	0.00155546	198031	1.63482	1197.91	1361.53	0.511238	429.596	0.549857	0.13564	0.00263025	0.286883	106124	11.838	Luochuan County	Yan’an City	0.135326
2019	53	0.56294	22.82	11.1379	0.00145626	203864	1.6869	1738.93	1360.9	0.495693	446.757	0.493943	0.1772	0.00255027	0.289321	106324	11.938	Luochuan County	Yan’an City	0.176219
2020	53	0.753	20.17	10.6065	0.0017992	185779	11.9825	1761.43	1348.45	0.491881	509.37	0.438239	0.220717	0.00253066	0.2915	106524	12.038	Luochuan County	Yan’an City	0.217112
2021	53	0.912543	17.52	11.0551	0.00260586	188481	22.2782	1732.37	1557.19	0.488128	590.925	0.382744	0.227396	0.00251135	0.293459	106724	12.138	Luochuan County	Yan’an City	0.258005
2012	54	0.260828	16	9.2834	0.00189337	100397	1.8825	2886.82	72.0574	0.744541	652	0.298574	0.615784	0.00143788	0.271905	37304	6.254	Fu County	Yan’an City	0.097918
2013	54	0.247298	16	10.8643	0.00207656	115300	2.3625	1979.77	77.7273	0.788774	615.438	0.317132	0.641659	0.00162486	0.271898	35389	6.2475	Fu County	Yan’an City	0.063219
2014	54	0.334928	15	10.0368	0.00196202	114500	2.59667	2364.24	93.1818	0.787414	657.6	0.339817	0.583818	0.00182482	0.275388	35010	6.241	Fu County	Yan’an City	0.092627
2015	54	0.363927	16	10.3906	0.00150514	137700	2.55938	2661.48	97.9665	0.787414	616.5	0.327541	0.531971	0.00182482	0.279144	36426	6.312	Fu County	Yan’an City	0.105586
2016	54	0.391018	15.88	10.5014	0.00173866	144300	2.81549	2859.67	106.962	0.784947	623.111	0.324274	0.540476	0.00111167	0.279868	36426	6.448	Fu County	Yan’an City	0.12157
2017	54	0.509485	15.76	10.6015	0.00162522	155060	3.35723	3362.24	126.579	0.776783	634.454	0.304297	0.471274	0.00110011	0.280492	36609	6.286	Fu County	Yan’an City	0.177327
2018	54	0.592379	15.74	10.1845	0.00173094	170980	3.98284	3864.82	149.947	0.772534	638.755	0.330774	0.451667	0.00119355	0.281036	32950	5.647	Fu County	Yan’an City	0.193402
2019	54	0.615892	15.68	10.5178	0.00165866	180202	4.23279	4367.39	158.78	0.772534	641.199	0.341304	0.446727	0.00119355	0.281513	33290	5.733	Fu County	Yan’an City	0.167818
2020	54	0.726521	14.29	10.0459	0.00190106	180521	5.64416	4442.62	173.135	0.772534	703.569	0.351621	0.428199	0.00119355	0.281936	33630	5.819	Fu County	Yan’an City	0.142234
2021	54	0.780608	12.9	10.5523	0.00248806	177288	7.05553	4387.67	198.87	0.772534	779.38	0.361731	0.388905	0.00119355	0.282314	33970	5.905	Fu County	Yan’an City	0.11665
2012	55	0.194795	13	9.504	0.002076	150580	7.95385	2419.77	452.121	0.372673	773.385	0.19489	0.106614	0.00238711	0.268257	46616	10.354	Huangling County	Yan’an City	0.053639
2013	55	0.210141	13	11.1259	0.00199032	156013	8.34846	1662.95	474.552	0.419205	687.538	0.236754	0.112839	0.00290893	0.269313	45638	10.431	Huangling County	Yan’an City	0.072219
2014	55	0.40817	13	10.2448	0.00198873	127301	8.56615	1982.9	486.926	0.418877	688.077	0.23411	0.128127	0.00301845	0.271625	47939	10.345	Huangling County	Yan’an City	0.110882
2015	55	0.363537	13	10.5478	0.00160843	145943	6.63769	2242.29	376.913	0.383349	751.846	0.23054	0.15901	0.00276243	0.275798	50013	10.067	Huangling County	Yan’an City	0.088006
2016	55	0.351318	12.66	10.7936	0.00177955	155417	7.57316	2498.46	419.064	0.389526	759.795	0.230427	0.149678	0.00176734	0.27597	49456	10.002	Huangling County	Yan’an City	0.088229
2017	55	0.34815	13.23	10.815	0.00163749	214950	9.56689	3493.15	523.918	0.40546	698.488	0.252164	0.121739	0.00183963	0.276118	45752	9.894	Huangling County	Yan’an City	0.089082
2018	55	0.544901	13.19	10.3834	0.00174642	252735	11.5548	4487.83	666.409	0.417663	680.136	0.222635	0.10869	0.00200647	0.276248	53289	7.819	Huangling County	Yan’an City	0.105553
2019	55	0.536227	13.04	10.6714	0.00165045	259155	14.2585	5482.52	812.965	0.40454	710.276	0.224057	0.0930117	0.00194342	0.276363	53580	7.952	Huangling County	Yan’an City	0.088277
2020	55	0.599136	12.7	10.342	0.00195637	251748	13.3796	5551.62	739.005	0.410479	718.74	0.225465	0.106628	0.00197195	0.276465	53871	8.085	Huangling County	Yan’an City	0.084222
2021	55	0.646059	12.36	10.7372	0.00274409	307538	12.5006	5458.15	38.7407	0.416595	727.67	0.188804	0.722235	0.000555926	0.276556	54162	8.218	Huangling County	Yan’an City	0.131082
2012	56	0.297915	5	9.14906	0.00194868	73906	2.32	1468.77	36.9993	0.574829	2373	0.130003	0.680738	0.000589971	0.276875	77375	10.202	Huanglong County	Yan’an City	0.11035
2013	56	0.437448	5	10.8144	0.00212136	94321	2.222	11.5789	40.4588	0.573572	2378.2	0.128615	0.725977	0.000672778	0.277778	82121	11.004	Huanglong County	Yan’an City	0.167632
2014	56	0.544408	5	9.86921	0.00232114	99232	2.654	127.963	48.3248	0.566003	2410	0.124389	0.624258	0.0006639	0.278988	86149	11.197	Huanglong County	Yan’an City	0.203246
2015	56	0.704966	5	10.1758	0.00174887	100810	2.792	1362.82	50.8376	0.57074	2390	0.110813	0.609499	0.000585774	0.264662	95918	11.242	Huanglong County	Yan’an City	0.252897
2016	56	0.638135	5.02	10.3062	0.00227029	93137	3.71713	1362.66	56.1544	0.580158	2341.83	0.123901	0.569689	0.000595441	0.26538	90572	10.587	Huanglong County	Yan’an City	0.254124
2017	56	0.368757	5.02	10.4184	0.00190956	103664	3.39243	983.62	62.0175	0.587403	2312.95	0.156552	0.46323	0.000689002	0.265999	69900	9.477	Huanglong County	Yan’an City	0.160462
2018	56	0.557457	5	10.1321	0.00183976	119594	3.7338	604.576	67.9614	0.595143	2292	0.148391	0.537972	0.00069808	0.266537	73192	8.829	Huanglong County	Yan’an City	0.179978
2019	56	0.430799	4.92	10.4699	0.00180307	147445	3.96953	225.531	71.0961	0.618457	2241.46	0.146663	0.624574	0.000725426	0.267009	73495	8.959	Huanglong County	Yan’an City	0.204216
2020	56	0.439957	4.12	10.0301	0.00213673	149702	5.46951	249.792	82.0328	0.643671	2571.84	0.14495	0.63692	0.000755002	0.267426	73798	9.089	Huanglong County	Yan’an City	0.174287
2021	56	0.4408	3.32	10.4813	0.00302311	154439	6.9695	214.539	67.6374	0.671029	3061.45	0.128527	0.872643	0.00236128	0.267799	74101	9.219	Huanglong County	Yan’an City	0.135255
2012	57	0.244928	12	9.6499	0.00178795	100650	1.73167	229.643	70.8248	0.223283	987.833	0.404255	0.873879	0.00219335	0.247732	37083	6.786	Yichuan County	Yan’an City	0.050912
2013	57	0.268888	12	11.2824	0.00226985	113693	1.89333	1516.48	77.4369	0.224172	983.917	0.489348	0.862711	0.00228678	0.247243	36614	6.804	Yichuan County	Yan’an City	0.056974
2014	57	0.270799	12	10.4654	0.00202379	105068	2.11	188.366	86.2986	0.178224	1237.58	0.500013	0.781497	0.00188539	0.25069	37235	6.784	Yichuan County	Yan’an City	0.057967
2015	57	0.291792	12	10.9717	0.00135665	115119	2.32667	1985.26	95.0306	0.180435	1222.42	0.52164	0.725398	0.00115891	0.26149	36322	6.748	Yichuan County	Yan’an City	0.064051
2016	57	0.0709796	12.48	10.9995	0.00182232	138806	2.42949	217.712	103.199	0.180263	1176.52	0.548064	0.671913	0.00122591	0.261835	35047	6.77	Yichuan County	Yan’an City	0.027755
2017	57	0.233839	12.24	11.1279	0.00155274	148216	2.96244	1227.8	123.418	0.177364	1219.2	0.518045	0.694236	0.00120619	0.262136	35217	6.729	Yichuan County	Yan’an City	0.067873
2018	57	0.384575	12.23	11.0544	0.00134111	172589	3.89375	2237.89	128.601	0.177364	1220.2	0.710873	0.674917	0.00120619	0.2624	27251	4.185	Yichuan County	Yan’an City	0.118759
2019	57	0.518129	12.15	11.3426	0.00148261	167398	3.49823	3247.97	144.331	0.177435	1227.74	0.751411	0.609077	0.00120668	0.262633	27282	4.206	Yichuan County	Yan’an City	0.169644
2020	57	0.6249	11.21	10.5604	0.00197463	172239	4.65433	3283.42	155.117	0.177506	1330.15	0.791857	0.573904	0.00120716	0.262842	27313	4.227	Yichuan County	Yan’an City	0.210113
2021	57	0.726972	10.27	10.9717	0.00270584	172856	5.81042	3222.74	72.315	0.177578	1451.31	0.460357	0.436469	0.000603824	0.263029	27344	4.248	Yichuan County	Yan’an City	0.248753

## Sheet: Southern Shaanxi
Year	id	Y	Total population at the end of the year(10,000 people)	Average annual temperature（℃）	Average annual precipitation	Local budget expenditures(10,000 yuan)	Population productivity (million yuan/person)	Effective irrigated area(ha)	Regional economic density(million yuan/square kilometer)	Protection Rate of Permanent Basic Farmland	Cultivated land area per capital (ha/million people)	Fertilizer Application Intensity	Proportion of Gross Output Value of Farming, Forestry, Animal Husbandry and Fishery	Total Mechanical Power per Unit Cultivated Land	Proportion of Per Capita Disposable Income of Rural Residents	Total Grain Output	Sown Area of Grain Crops	xian	County/District	Y2
2012	74	0.199964	20	11.1197	0.00280116	120616	3.2935	7445.59	232.674	0.354726	503.7	0.0780588	0.221612	0.00248164	0.220997	46939	20.267	Lueyang County	Hanzhong City	0.034176
2013	74	0.246167	19	12.534	0.00293219	130816	3.32579	6435.85	223.207	0.354797	530.105	0.0766221	0.24643	0.00248213	0.225068	47532	20.294	Lueyang County	Hanzhong City	0.060718
2014	74	0.265467	19	11.9116	0.00272108	131970	2.65579	6519.97	178.241	0.355715	528.737	0.0778879	0.3222	0.00248855	0.227724	47119	20.243	Lueyang County	Hanzhong City	0.054352
2015	74	0.345679	19	12.294	0.00282542	140726	2.94422	6524.26	197.598	0.355715	528.737	0.0749045	0.309435	0.00209038	0.256146	48168	20.314	Lueyang County	Hanzhong City	0.091501
2016	74	0.369529	18.53	12.4862	0.00229658	181022	3.64492	6556.63	238.573	0.355715	542.148	0.0738729	0.262074	0.00218993	0.256324	48421	20.169	Lueyang County	Hanzhong City	0.089791
2017	74	0.486976	20.03	12.3248	0.0027366	192519	3.6122	4403.73	255.558	0.355715	501.548	0.0691186	0.206457	0.00218993	0.256477	49104	20.1676	Lueyang County	Hanzhong City	0.11277
2018	74	0.42935	20	12.1019	0.00290801	222919	3.55828	2250.84	251.379	0.355715	502.3	0.0570998	0.233813	0.00218993	0.256609	43783	17.2714	Lueyang County	Hanzhong City	0.102578
2019	74	0.570997	20	11.9762	0.00300554	298695	3.1915	97.9395	225.468	0.35575	502.25	0.0359896	0.287357	0.00219014	0.256725	44624	17.275	Lueyang County	Hanzhong City	0.143755
2020	74	0.7053	14.4	11.7717	0.00372668	265986	4.84278	987.384	246.203	0.355786	697.5	0.0156604	0.287584	0.00219036	0.256827	45465	17.3523	Lueyang County	Hanzhong City	0.178036
2021	74	0.857299	8.8	11.9058	0.00416138	248707	6.49406	9186.83	171.318	0.355821	1141.25	0.254546	0.52521	0.00139401	0.256918	46306	17.4296	Lueyang County	Hanzhong City	0.210161
2012	75	0.111565	33	11.6533	0.00351994	157816	1.69242	3528.74	171.319	0.156826	644.121	0.14484	0.508258	0.000705683	0.223266	82208	30.898	Ningqiang County	Hanzhong City	0.015818
2013	75	0.193232	33	12.9366	0.00355383	151795	1.87667	349.148	189.969	0.156804	644.212	0.142814	0.486948	0.000799661	0.225505	83255	30.938	Ningqiang County	Hanzhong City	0.046516
2014	75	0.325309	33	12.2695	0.00343671	169701	1.94333	38.4519	196.687	0.156775	644.333	0.143939	0.491854	0.000846541	0.227857	82549	30.818	Ningqiang County	Hanzhong City	0.083444
2015	75	0.425445	33	12.7753	0.00316055	186927	2.16788	381.872	219.448	0.156745	644.455	0.119226	0.471842	0.000893403	0.254752	85233	30.84	Ningqiang County	Hanzhong City	0.131126
2016	75	0.63311	32.66	12.9055	0.00265309	200081	2.55525	399.818	255.521	0.156878	650.612	0.119151	0.412325	0.000941221	0.254651	85656	30.784	Ningqiang County	Hanzhong City	0.158141
2017	75	0.769439	30.91	12.7148	0.0030204	227177	2.88855	1691.08	273.151	0.156532	688.968	0.117185	0.323196	0.000986101	0.254565	87409	30.8464	Ningqiang County	Hanzhong City	0.194867
2018	75	0.582016	30.88	12.4884	0.00347467	263861	3.23873	2982.33	306.784	0.157508	685.363	0.134758	0.319046	0.000992251	0.25449	76834	27.1021	Ningqiang County	Hanzhong City	0.135799
2019	75	0.668915	30.89	12.3729	0.00337119	304326	3.45219	4273.59	327.111	0.157441	685.432	0.133863	0.328558	0.000991829	0.254425	78177	27.144	Ningqiang County	Hanzhong City	0.169827
2020	75	0.768423	25.64	12.2692	0.00440394	278542	4.8749	439.295	383.412	0.157374	826.131	0.132998	0.305343	0.000991408	0.254368	79520	27.2225	Ningqiang County	Hanzhong City	0.19304
2021	75	0.8588	20.39	12.4493	0.0045404	252758	6.2976	4353.89	14.816	0.157307	1039.28	0.0066285	0.377888	9.43797e-05	0.254317	80863	27.3009	Ningqiang County	Hanzhong City	0.198098
2012	76	0.07267	3	9.41398	0.00350773	46501	1.93	8292.57	45.2697	0.149125	611	0.0609357	0.351969	0.00218221	0.22445	8550	2.803	Foping County	Hanzhong City	0.006565
2013	76	0.211185	3	10.9097	0.00318947	53051	2.21667	7159.69	51.9937	0.149125	611	0.0647956	0.327744	0.00218221	0.227403	8658	2.804	Foping County	Hanzhong City	0.053999
2014	76	0.301223	3	10.1111	0.00337359	55700	2.44	7246.8	57.2322	0.146097	623.667	0.07167	0.316052	0.00213789	0.229462	8581	2.794	Foping County	Hanzhong City	0.076712
2015	76	0.424575	3	10.4485	0.00337999	66274	2.85333	7246.54	66.9273	0.145166	627.667	0.0665343	0.285853	0.0015932	0.256656	9063	2.801	Foping County	Hanzhong City	0.097401
2016	76	0.446343	3.3	10.5452	0.00295981	76669	2.9697	7312.62	76.6224	0.147436	561.818	0.0669304	0.256551	0.00161812	0.25843	9099	2.795	Foping County	Hanzhong City	0.089085
2017	76	0.526379	3.02	10.3516	0.00358053	80655	3.61132	5286.86	85.2432	0.147835	612.252	0.0651986	0.278475	0.0016225	0.259954	9264	2.80335	Foping County	Hanzhong City	0.101224
2018	76	0.642303	3.02	9.97183	0.00343542	80018	3.82318	3261.1	89.7318	0.147357	614.238	0.0684705	0.291573	0.00161725	0.261279	9055	2.63608	Foping County	Hanzhong City	0.114299
2019	76	0.709683	3.02	10.0334	0.00422469	79661	3.93425	1235.35	93.7751	0.147516	613.576	0.0692358	0.307753	0.001619	0.262441	9186	2.639	Foping County	Hanzhong City	0.119009
2020	76	0.785536	2.66	9.91317	0.00398737	93233	4.96923	1334.96	103.001	0.147675	695.865	0.0699796	0.303957	0.00162075	0.263469	9317	2.66681	Foping County	Hanzhong City	0.131933
2021	76	0.849216	2.3	10.3524	0.00555712	91759	6.0042	1457.5	69.2976	0.147835	803.913	0.0877434	0.482563	0.00108167	0.264383	9448	2.69463	Foping County	Hanzhong City	0.147201
2012	77	0.0583215	4	9.64703	0.00365964	53101	2.5175	18.9699	54.315	0.354306	771.5	0.0705652	0.469285	0.000972132	0.224047	11748	3.191	Liuba County	Hanzhong City	0.002548
2013	77	0.165218	4	11.1257	0.00380744	53291	2.855	934.246	61.5965	0.354306	771.5	0.0696814	0.445324	0.000972132	0.226121	11897	3.191	Liuba County	Hanzhong City	0.043618
2014	77	0.267411	4	10.3499	0.00323613	61465	3.1925	94.1414	64.9873	0.356617	766.5	0.0707382	0.413038	0.00130463	0.229574	11691	3.18	Liuba County	Hanzhong City	0.061045
2015	77	0.379521	4	10.7949	0.00320853	61458	3.5275	939.415	71.8066	0.3572	765.25	0.0666004	0.396981	0.00130676	0.256423	12072	3.182	Liuba County	Hanzhong City	0.091445
2016	77	0.432896	4.25	10.7983	0.00294223	76000	3.69176	966.164	79.8473	0.349214	736.706	0.066375	0.368311	0.00127755	0.25747	12113	3.162	Liuba County	Hanzhong City	0.088231
2017	77	0.503061	4.35	10.6944	0.00327371	83583	3.8969	1088.56	86.116	0.34777	722.759	0.0384647	0.312449	0.00127226	0.258368	12323	3.17142	Liuba County	Hanzhong City	0.103622
2018	77	0.61952	4.34	10.3775	0.00347208	93144	4.37512	1210.95	95.1379	0.35067	718.433	0.0476044	0.315214	0.00128287	0.259148	9726	2.67935	Liuba County	Hanzhong City	0.1462
2019	77	0.743045	4.34	10.3577	0.00375178	94270	4.58525	1333.34	101.272	0.348879	722.12	0.0458	0.326553	0.00127632	0.259831	9869	2.683	Liuba County	Hanzhong City	0.190677
2020	77	0.865432	3.53	10.2759	0.00396874	113600	6.24646	1351.4	112.214	0.347107	892.351	0.0440471	0.322177	0.00126984	0.260434	10012	2.70708	Liuba County	Hanzhong City	0.234586
2021	77	0.952195	2.72	10.5691	0.00493081	112300	7.90766	1372.55	279.695	0.345353	1163.97	1.39586	0.481554	0.0101074	0.260971	10155	2.73116	Liuba County	Hanzhong City	0.251976
2012	78	0.0747855	42	11.9781	0.00385365	164500	1.55239	642.667	199.694	0.307079	516.929	0.149393	0.452015	0.00151997	0.223855	98264	30.076	Xixiang County	Hanzhong City	0.02288
2013	78	0.121573	42	13.4052	0.00329277	179588	1.79476	554.913	230.873	0.304972	520.5	0.136721	0.416201	0.00150954	0.229195	99524	30.112	Xixiang County	Hanzhong City	0.035786
2014	78	0.249863	42	12.6097	0.00354494	199500	1.93333	573.713	249.616	0.303736	522.619	0.139475	0.406905	0.00159453	0.232352	98670	29.996	Xixiang County	Hanzhong City	0.058083
2015	78	0.361863	42	12.8913	0.00372277	222550	2.15929	577.659	278.789	0.303736	522.619	0.133345	0.392702	0.00123007	0.257297	102531	30.162	Xixiang County	Hanzhong City	0.087977
2016	78	0.384784	41.45	13.2815	0.00299867	239611	2.45428	572.733	312.727	0.303736	529.554	0.125675	0.356398	0.00123007	0.257396	102853	30.177	Xixiang County	Hanzhong City	0.088383
2017	78	0.482305	34.5	12.9035	0.00397963	256329	3.21315	644.605	340.773	0.303736	636.232	0.124489	0.336413	0.00109339	0.25748	104724	30.238	Xixiang County	Hanzhong City	0.111466
2018	78	0.516319	34.46	12.7873	0.00388909	261977	3.38657	716.477	358.75	0.298367	648.433	0.114324	0.357664	0.00102931	0.257552	96384	26.5522	Xixiang County	Hanzhong City	0.109303
2019	78	0.653705	34.47	12.6042	0.00423439	307656	3.5428	788.349	375.408	0.298367	648.245	0.0922981	0.378211	0.00098456	0.257616	97521	26.59	Xixiang County	Hanzhong City	0.144899
2020	78	0.804168	32.15	12.6332	0.00428631	285859	4.16747	794.157	411.878	0.298367	695.023	0.0707799	0.377915	0.000939808	0.257672	98658	26.6779	Xixiang County	Hanzhong City	0.1813
2021	78	0.857672	29.83	12.778	0.00595885	289045	4.79213	81.5881	124.5	0.298367	749.078	0.0735408	0.533052	0.000402775	0.257721	99795	26.7659	Xixiang County	Hanzhong City	0.212747
2012	79	0.0611117	29	11.0596	0.00382393	129086	1.66	18623.8	141.008	0.213747	816.345	0.0890114	0.499186	0.000422404	0.222665	86517	38.552	Zhenba County	Hanzhong City	0.00847
2013	79	0.144432	29	12.562	0.00333402	148470	1.94552	19197.9	165.261	0.213964	815.517	0.0815996	0.456012	0.000422833	0.224763	87623	38.601	Zhenba County	Hanzhong City	0.034359
2014	79	0.228958	29	11.6751	0.00402408	157028	2.13448	19952.4	169.625	0.214136	814.862	0.0717896	0.461388	0.000423173	0.227411	86865	38.464	Zhenba County	Hanzhong City	0.061284
2015	79	0.416213	29	12.0266	0.00421433	178736	2.24724	19544.7	189.613	0.214236	814.483	0.0595543	0.441705	0.000338696	0.255247	89515	38.876	Zhenba County	Hanzhong City	0.105218
2016	79	0.454437	28.41	12.2454	0.00340302	190789	2.76346	23829.3	228.426	0.213522	834.178	0.0659028	0.376012	0.000295371	0.256472	89981	38.857	Zhenba County	Hanzhong City	0.114004
2017	79	0.534792	24.89	12.0247	0.00455332	241629	3.39726	27937.1	246.022	0.212491	956.77	0.0652657	0.353752	0.000293945	0.257525	91886	38.9537	Zhenba County	Hanzhong City	0.143804
2018	79	0.592589	24.87	11.8462	0.00373799	284877	3.71723	32044.8	268.977	0.210616	966.063	0.0503727	0.358937	0.000291351	0.25844	93384	37.7312	Zhenba County	Hanzhong City	0.167062
2019	79	0.69573	24.88	11.7166	0.00416547	373966	3.33557	36152.6	241.457	0.210336	966.961	0.0358234	0.439253	0.000290964	0.259241	95217	37.744	Zhenba County	Hanzhong City	0.197716
2020	79	0.787627	21.09	11.7445	0.00469476	305168	4.48959	37412.2	275.489	0.210056	1142.25	0.0218238	0.41953	0.000290577	0.25995	97050	37.8468	Zhenba County	Hanzhong City	0.228371
2021	79	0.91802	17.3	12.0012	0.00614236	301825	5.64362	38771.9	454.728	0.209778	1394.34	0.0670489	0.159152	0.000497471	0.260581	98883	37.9496	Zhenba County	Hanzhong City	0.259025
2012	80	0.223657	56.29	12.7276	0.00346812	179216	3.14692	2867.34	3185.97	0.724198	265.109	0.0646657	0.156171	0.000938149	0.227942	103517	17.774	Hantai District	Hanzhong City	0.062404
2013	80	0.296417	56.82	14.055	0.00306007	212643	3.58835	18422.9	3667.09	0.729477	260.736	0.085345	0.144571	0.00101249	0.227246	104845	17.796	Hantai District	Hanzhong City	0.075524
2014	80	0.3237	57.2	13.3858	0.00318402	216471	4.2535	18587.9	4141.19	0.731551	258.269	0.0854591	0.133221	0.00115075	0.226035	103886	17.729	Hantai District	Hanzhong City	0.08586
2015	80	0.423056	57.52	13.7594	0.00306015	264497	4.38578	18597.7	4537.23	0.739308	254.138	0.118579	0.130887	0.00116295	0.258494	107582	17.755	Hantai District	Hanzhong City	0.109384
2016	80	0.36965	57.05	14.0488	0.00253548	285947	5.37686	2182.4	5169.06	0.768431	246.521	0.114467	0.117184	0.00127986	0.258844	107944	17.423	Hantai District	Hanzhong City	0.088583
2017	80	0.421816	54.08	13.6333	0.00320874	319687	5.96413	12996.4	5801.08	0.783869	254.937	0.106973	0.0810265	0.00130558	0.259145	110074	17.1759	Hantai District	Hanzhong City	0.095348
2018	80	0.438406	54.02	13.5535	0.00343535	365757	6.9615	23810.4	6763.67	0.786551	254.35	0.106409	0.0765412	0.00138282	0.259405	113270	16.5195	Hantai District	Hanzhong City	0.101381
2019	80	0.519989	54.03	13.3321	0.00385077	377779	6.9554	34624.4	6758.99	0.801127	249.676	0.108158	0.0836453	0.00148258	0.259632	114009	16.429	Hantai District	Hanzhong City	0.122862
2020	80	0.590901	61.82	13.2356	0.00372529	328417	6.74734	34944.5	6754.32	0.816254	214.17	0.109884	0.0907592	0.0015861	0.259833	114748	16.4806	Hantai District	Hanzhong City	0.139007
2021	80	0.325755	69.61	13.3821	0.00481373	279055	6.53928	35341.8	1737.23	0.831964	186.611	0.177197	0.315732	0.00100077	0.260012	115487	16.5322	Hantai District	Hanzhong City	0.074168
2012	81	0.0749621	43	10.7415	0.00369079	164777	2.45293	15153.2	442.653	0.466901	610.023	0.154857	0.320755	0.000609965	0.24719	132994	30.811	Mian County	Hanzhong City	0.017294
2013	81	0.144133	43	12.065	0.00353029	187699	2.59932	1397.23	467.716	0.465959	611.256	0.159737	0.322779	0.000646781	0.251869	134696	30.852	Mian County	Hanzhong City	0.039278
2014	81	0.207919	43	11.3808	0.0034438	195829	2.45932	13265.9	439.526	0.465304	612.116	0.165901	0.356678	0.000721857	0.253556	133513	30.736	Mian County	Hanzhong City	0.045474
2015	81	0.230727	43	11.7954	0.00341624	223185	2.35256	13272.5	420.449	0.462511	615.814	0.170594	0.400844	0.000641994	0.257362	131171	30.465	Mian County	Hanzhong City	0.063749
2016	81	0.245332	42.76	11.9433	0.00284252	263309	3.23152	13349.3	537.282	0.460337	622.194	0.169887	0.317394	0.000638978	0.257723	132523	30.322	Mian County	Hanzhong City	0.054109
2017	81	0.321672	39.4	11.6789	0.00336252	274556	3.74569	9514.92	612.545	0.436872	711.523	0.165769	0.256128	0.000677748	0.258031	131460	30.0276	Mian County	Hanzhong City	0.079237
2018	81	0.350228	38.41	11.5475	0.00357848	300720	3.82779	5680.52	611.079	0.428871	743.478	0.158976	0.284952	0.000700354	0.258296	136618	29.8669	Mian County	Hanzhong City	0.078232
2019	81	0.405567	38.41	11.3863	0.00381747	314217	4.18979	1846.12	668.868	0.431942	738.193	0.158556	0.286106	0.000740636	0.258528	136520	29.763	Mian County	Hanzhong City	0.085796
2020	81	0.481248	34.49	11.3182	0.00415161	310432	5.18237	1856.45	742.892	0.435057	816.208	0.158134	0.280802	0.0007815	0.258731	136422	29.8406	Mian County	Hanzhong City	0.093952
2021	81	0.705065	30.57	11.542	0.00508099	275982	6.17495	18755.6	477.556	0.438217	914.23	0.168356	0.287977	0.000644053	0.258911	136324	29.9182	Mian County	Hanzhong City	0.169119
2012	82	0.29411	56	11.364	0.0045141	218682	2.41714	2876.49	476.133	0.422643	539.714	0.146924	0.273249	0.000661726	0.261222	147416	38.0427	Nanzheng District	Hanzhong City	0.078671
2013	82	0.34655	56	12.7038	0.00405407	235237	2.75714	24265.4	545.467	0.423484	538.643	0.136403	0.254746	0.000729346	0.266314	149315	37.0226	Nanzheng District	Hanzhong City	0.095055
2014	82	0.380482	57	11.9428	0.00428053	264524	2.89263	26123.4	583.853	0.419562	534.14	0.128879	0.249884	0.000722591	0.26894	148007	36.0026	Nanzheng District	Hanzhong City	0.094856
2015	82	0.61933	57	12.4254	0.00394307	293040	3.5386	2636.35	616.395	0.437555	512.175	0.120031	0.25469	0.000719326	0.257764	148153	34.9825	Nanzheng District	Hanzhong City	0.155598
2016	82	0.636426	56.53	12.5784	0.00333032	311057	3.44333	26470	681.409	0.437495	516.505	0.110834	0.23352	0.000787725	0.25782	148790	33.9624	Nanzheng District	Hanzhong City	0.166401
2017	82	0.544444	47.77	12.2749	0.0041132	346227	4.53966	29824.3	772.008	0.371866	719.091	0.102815	0.246089	0.000669558	0.257868	147828	32.9424	Nanzheng District	Hanzhong City	0.119316
2018	82	0.533306	47.72	12.1066	0.00415725	382132	4.57694	33178.6	777.54	0.367248	728.898	0.0963393	0.270193	0.000661243	0.257909	156499	31.9223	Nanzheng District	Hanzhong City	0.118951
2019	82	0.575467	47.74	12.009	0.00462916	390344	4.72443	36532.9	802.935	0.353077	757.834	0.0960908	0.286684	0.000635728	0.257946	155634	31.831	Nanzheng District	Hanzhong City	0.129704
2020	82	0.693806	46.62	12.0119	0.00488267	424527	5.14259	36853.2	853.498	0.339959	805.985	0.0958396	0.293255	0.000612109	0.257978	154769	31.927	Nanzheng District	Hanzhong City	0.162339
2021	82	0.719346	45.5	12.2108	0.00618719	375994	5.56074	58162.6	428.266	0.327781	856.506	0.221723	0.509301	0.000513202	0.258006	153904	32.0229	Nanzheng District	Hanzhong City	0.168318
2012	83	0.036622	54	12.084	0.00357903	182600	2.56926	47945.9	610.552	0.450295	450.481	0.246269	0.491485	0.00094549	0.263131	139827	27.133	Chenggu County	Hanzhong City	0.000301
2013	83	0.245079	54	13.422	0.00323514	211118	3.12667	4257.47	745.43	0.450314	450.463	0.261405	0.430312	0.000986639	0.267836	141604	27.167	Chenggu County	Hanzhong City	0.048139
2014	83	0.378531	54	12.7313	0.00326283	227081	3.56519	4695.27	849.978	0.453577	447.222	0.266641	0.388963	0.0010352	0.271355	140327	27.061	Chenggu County	Hanzhong City	0.077482
2015	83	0.441372	54	13.0978	0.00314695	280012	4.22593	49544.9	959.029	0.453708	447.093	0.249906	0.368512	0.000952657	0.258311	141017	26.587	Chenggu County	Hanzhong City	0.089378
2016	83	0.423606	54.27	13.3674	0.00269135	306988	4.54653	65577.4	1089.36	0.456431	442.215	0.24065	0.332083	0.00100004	0.259027	141359	26.457	Chenggu County	Hanzhong City	0.100194
2017	83	0.516033	47.24	12.9988	0.00334191	340164	5.51227	46999.4	1149.67	0.458168	506.097	0.245863	0.291918	0.00104568	0.259639	141453	26.1663	Chenggu County	Hanzhong City	0.122116
2018	83	0.633305	47.19	12.8514	0.00359597	372798	4.92564	28421.5	1026.23	0.460305	504.281	0.221938	0.359058	0.00105055	0.260169	155291	28.3513	Chenggu County	Hanzhong City	0.156634
2019	83	0.673539	47.21	12.7018	0.00400876	400825	5.32544	9843.49	1110	0.460615	503.728	0.22066	0.361573	0.00105126	0.260633	154772	28.268	Chenggu County	Hanzhong City	0.168364
2020	83	0.721941	44.2	12.7383	0.00386871	374989	6.39	9165.73	1246.97	0.460925	537.67	0.219373	0.348215	0.00105197	0.261041	154253	28.3409	Chenggu County	Hanzhong City	0.182554
2021	83	0.88702	41.19	12.9039	0.00509182	360158	7.45456	1816.77	325.607	0.461235	576.572	0.128104	0.436674	0.000800034	0.261404	153734	28.4138	Chenggu County	Hanzhong City	0.2319
2012	84	0.0278352	45	11.4323	0.00324934	169489	1.89	14616.2	265.284	0.335702	620.511	0.140757	0.418904	0.000752068	0.225306	155658	33.215	Yang County	Hanzhong City	0.000316
2013	84	0.162173	45	12.7446	0.00288588	188892	2.97778	12636.5	294.448	0.338014	616.267	0.151606	0.403372	0.000793307	0.229553	157626	33.26	Yang County	Hanzhong City	0.04265
2014	84	0.208004	45	12.0369	0.00307887	221117	2.228	12799.2	312.726	0.339188	614.133	0.148991	0.397605	0.000832248	0.230985	156204	33.131	Yang County	Hanzhong City	0.046377
2015	84	0.262176	45	12.3206	0.00312749	247469	2.36733	13216.8	332.283	0.337308	617.556	0.11012	0.401729	0.000719683	0.258821	157065	32.9625	Yang County	Hanzhong City	0.053175
2016	84	0.442093	44.93	12.6377	0.00261977	276789	2.69852	1491.62	377.105	0.335114	622.568	0.108904	0.360878	0.000715001	0.259344	157753	32.794	Yang County	Hanzhong City	0.107185
2017	84	0.418337	38.74	12.2811	0.00327507	306937	3.61545	1068.8	436.876	0.334408	723.567	0.119691	0.36215	0.000713496	0.259789	157255	32.6254	Yang County	Hanzhong City	0.105489
2018	84	0.616263	38.7	12.0793	0.00339625	315140	4.21597	645.985	508.915	0.335162	722.687	0.117865	0.342748	0.000786613	0.260174	165333	33.3506	Yang County	Hanzhong City	0.153846
2019	84	0.684787	38.71	12.0005	0.00396018	337963	4.4525	223.165	537.605	0.335234	722.346	0.119968	0.354618	0.000858308	0.26051	165044	33.236	Yang County	Hanzhong City	0.165029
2020	84	0.880332	34.54	12.0489	0.00365393	340335	5.5849	22491.9	601.692	0.335306	809.38	0.122078	0.343796	0.000930033	0.260806	164755	33.3233	Yang County	Hanzhong City	0.211421
2021	84	0.955144	30.37	12.2602	0.0050814	302461	6.7173	1277.58	508.515	0.335378	920.316	0.303467	0.221605	0.00139535	0.261068	164466	33.4106	Yang County	Hanzhong City	0.225291
2012	85	0.29927	101.93	13.1646	0.00238625	321967	1.83923	494.244	514.603	0.199084	421.191	0.226695	0.201032	0.00100158	0.211165	217363	54.751	Hanbin District	Ankang City	0.073147
2013	85	0.313702	102.45	14.855	0.00216557	355397	2.53587	382.279	577.519	0.199979	417.179	0.221696	0.183958	0.00124006	0.213236	218628	54.745	Hanbin District	Ankang City	0.083309
2014	85	0.409836	102.58	13.9468	0.00271129	409899	2.27842	3326.73	641.559	0.203803	408.832	0.235541	0.17284	0.00131146	0.213524	214162	53.852	Hanbin District	Ankang City	0.096778
2015	85	0.478481	100.84	14.0447	0.00256373	492528	2.55952	3492.49	692.177	0.205548	412.356	0.237284	0.167149	0.00134674	0.243902	214262	53.745	Hanbin District	Ankang City	0.109573
2016	85	0.499802	100.83	14.7472	0.00207389	510102	2.88525	3518.4	798.573	0.209277	405.048	0.242355	0.186676	0.00142014	0.24376	215201	53.583	Hanbin District	Ankang City	0.105072
2017	85	0.503889	88.04	14.2868	0.0031259	529209	3.88869	4753.66	939.775	0.209971	462.358	0.239919	0.176925	0.00152312	0.243638	212784	53.067	Hanbin District	Ankang City	0.08862
2018	85	0.615286	88.38	14.1642	0.00229795	643953	4.31364	5988.92	1045.7	0.210696	458.995	0.258543	0.175447	0.00162698	0.243533	186700	46.643	Hanbin District	Ankang City	0.10543
2019	85	0.710266	88.64	13.9997	0.00250996	740291	4.23985	7224.19	1031.62	0.211426	456.069	0.239813	0.194511	0.00173156	0.243442	189685	46.455	Hanbin District	Ankang City	0.125231
2020	85	0.785095	89.49	13.8922	0.00306739	724265	0.448497	7537.82	99.451	0.21216	450.173	0.0576945	0.461198	0.000421983	0.243361	192670	46.567	Hanbin District	Ankang City	0.145031
2021	85	0.158675	90.34	13.9592	0.00417577	708239	-3.34285	894.255	70.162	0.367064	257.749	0.0258823	0.400246	0.000343569	0.243289	195655	46.679	Hanbin District	Ankang City	0.000276
2012	86	0.121718	17	10.752	0.00356915	98712	1.82118	5468.27	158.282	0.123765	1010.82	0.0730633	0.342755	0.000465549	0.219338	64013	24.827	Langao County	Ankang City	0.017706
2013	86	0.20608	17	12.1658	0.00334037	122156	2.65294	3411.83	179.407	0.123794	1010.59	0.0714439	0.321535	0.000523865	0.221451	65142	24.836	Langao County	Ankang City	0.05637
2014	86	0.285008	17	11.4046	0.00403556	128389	2.36588	3681.59	205.059	0.126541	988.647	0.0733862	0.296614	0.000535491	0.221766	65530	24.693	Langao County	Ankang City	0.083259
2015	86	0.360389	17	11.7533	0.00393043	145268	2.67824	429.356	232.652	0.124737	1002.94	0.0687918	0.272697	0.00058651	0.242916	67290	24.885	Langao County	Ankang City	0.102462
2016	86	0.426695	16.82	11.9863	0.00321785	165134	3.12426	7424.12	268.523	0.124686	1014.09	0.0650173	0.276415	0.00058627	0.243593	67905	24.871	Langao County	Ankang City	0.116817
2017	86	0.447924	15.6	11.7634	0.00444798	187182	3.84938	9563.87	303.304	0.126548	1077.31	0.0636464	0.27382	0.000595026	0.244173	68582	24.828	Langao County	Ankang City	0.12372
2018	86	0.56215	15.65	11.5154	0.00374968	208179	3.77278	11703.6	296.469	0.126511	1074.19	0.100176	0.309906	0.000654333	0.244676	41497	14.592	Langao County	Ankang City	0.148638
2019	86	0.722778	15.67	11.489	0.00382094	304832	3.17218	13843.4	248.8	0.126473	1073.13	0.0932996	0.40476	0.000713606	0.245115	42326	14.522	Langao County	Ankang City	0.20724
2020	86	0.768293	13.5	11.3978	0.00450077	302919	4.74137	14444.6	281.044	0.126436	1246	0.107195	0.273518	0.000594495	0.245503	43155	14.748	Langao County	Ankang City	0.212516
2021	86	0.527763	11.33	11.7292	0.00500955	237918	6.31057	2324.9	242.31	0.115718	1622.15	0.252046	0.400202	0.000979379	0.245848	43984	14.974	Langao County	Ankang City	0.157985
2012	87	0.172626	31	12.9108	0.00276423	135000	1.89645	1438.62	429.377	0.254715	750.613	0.11053	0.342477	0.000816537	0.226936	100027	25.686	Hanyin County	Ankang City	0.029031
2013	87	0.217822	31	14.5535	0.00236475	157000	2.27742	896.899	501.392	0.257235	743.258	0.107044	0.305186	0.00095482	0.232207	102453	25.693	Hanyin County	Ankang City	0.06003
2014	87	0.3238	31	13.7106	0.00294924	171000	2.5	966.589	567.766	0.258289	740.226	0.107195	0.281772	0.000958731	0.234729	103270	25.913	Hanyin County	Ankang City	0.080046
2015	87	0.445144	31	13.789	0.00293558	189000	2.77935	114.553	631.209	0.258808	738.742	0.107383	0.26808	0.00100432	0.251513	101208	25.398	Hanyin County	Ankang City	0.126195
2016	87	0.448784	31.12	14.3937	0.00224254	192000	3.58846	121.181	697.363	0.258605	736.472	0.105553	0.267678	0.00104717	0.251691	101646	25.26	Hanyin County	Ankang City	0.110638
2017	87	0.516789	24.9	14.0466	0.00336058	207000	4.32418	177.285	788.793	0.259829	916.104	0.10686	0.263193	0.00109596	0.251843	100412	24.923	Hanyin County	Ankang City	0.128671
2018	87	0.588326	24.97	13.9139	0.00263249	258700	4.55479	233.388	824.189	0.261907	906.288	0.106126	0.277292	0.00114892	0.251975	96263	23.297	Hanyin County	Ankang City	0.135109
2019	87	0.669537	25.01	13.6438	0.00292727	275000	4.45782	289.491	733.733	0.264019	897.601	0.0987511	0.340012	0.00120273	0.252091	98247	23.192	Hanyin County	Ankang City	0.146585
2020	87	0.755096	24.02	13.6035	0.00350791	280000	4.61746	2178.45	812.538	0.266165	927.061	0.0520996	0.0869415	0.00053889	0.252193	100231	23.371	Hanyin County	Ankang City	0.165513
2021	87	0.457571	23.03	13.6942	0.0048391	255000	4.77711	7629.5	274.426	0.452924	568.215	0.0539451	0.255749	0.000917011	0.252283	102215	23.55	Hanyin County	Ankang City	0.119781
2012	88	0.177146	18	12.6366	0.00290019	121498	3.34556	4755.79	315.237	0.308945	727.722	0.0873621	0.23185	0.0009161	0.224682	66459	19.264	Shiquan County	Ankang City	0.038576
2013	88	0.134959	18	14.205	0.0022616	118995	3.42222	2995.23	361.214	0.308921	727.778	0.0825975	0.210398	0.000916031	0.227917	67048	19.263	Shiquan County	Ankang City	0.034265
2014	88	0.246657	18	13.4567	0.00284085	133666	3.49889	3232.19	415.435	0.308662	728.389	0.0817541	0.194176	0.000991534	0.229639	66859	19.138	Shiquan County	Ankang City	0.055067
2015	88	0.34628	18	13.4842	0.00286167	161888	3.96833	3395.93	471.174	0.308497	728.778	0.0744089	0.1776	0.000991005	0.251003	69911	19.353	Shiquan County	Ankang City	0.087221
2016	88	0.431646	18	14.0736	0.00212488	157006	4.49778	3448.84	527.771	0.308239	729.389	0.0684185	0.182485	0.00106634	0.252926	70668	19.358	Shiquan County	Ankang City	0.105706
2017	88	0.493324	18.28	13.6886	0.00318525	184729	5.26217	2563.74	634.515	0.309063	716.302	0.0670273	0.17378	0.00114556	0.254571	71180	19.338	Shiquan County	Ankang City	0.130888
2018	88	0.645475	17.32	13.5779	0.00269919	215990	5.43524	1678.64	620.965	0.307957	758.718	0.0753807	0.198204	0.00121756	0.255995	61196	15.774	Shiquan County	Ankang City	0.172278
2019	88	0.728392	17.38	13.328	0.00319319	224081	4.77678	793.539	547.628	0.30686	758.803	0.0712059	0.248143	0.00128905	0.25724	62565	15.723	Shiquan County	Ankang City	0.190282
2020	88	0.79997	17.42	13.2396	0.00339045	235086	5.38978	741.768	619.327	0.30577	759.759	0.00683517	0.0670657	0.000377786	0.258337	63934	15.915	Shiquan County	Ankang City	0.204615
2021	88	0.658372	15.32	13.3338	0.00492158	218040	1.23564	8517.37	51.4682	1.19518	221.018	0.0060181	0.373201	0.00147667	0.259311	65303	16.107	Shiquan County	Ankang City	0.134666
2012	89	0.157747	7	9.27667	0.00328479	68973	3.5	5282.26	58.222	0.649	484.286	0.0175836	0.349433	0.00147493	0.221946	19848	4.785	Ningshan County	Ankang City	0.038324
2013	89	0.198421	7	10.7822	0.00281229	80249	3.17429	3371.98	60.4133	0.648617	484.571	0.0174567	0.348033	0.00147406	0.228303	19935	4.801	Ningshan County	Ankang City	0.055849
2014	89	0.253889	7	9.96342	0.00309185	80040	3.52857	3633.36	66.6667	0.646521	486.143	0.0179575	0.327712	0.00146929	0.232732	19212	4.946	Ningshan County	Ankang City	0.072313
2015	89	0.310407	7	10.2394	0.00315595	89699	3.82857	3833.91	72.3763	0.646331	486.286	0.0177624	0.320763	0.00176263	0.246262	19423	5.106	Ningshan County	Ankang City	0.0842
2016	89	0.373516	7.26	10.3358	0.00281568	95437	4.15427	3847.93	82.0011	0.646331	468.871	0.0175412	0.312599	0.00176263	0.245926	19611	5.089	Ningshan County	Ankang City	0.099115
2017	89	0.360029	7.13	10.1704	0.00352122	113223	4.86558	5211.89	94.3219	0.646331	477.419	0.0172878	0.297352	0.00176263	0.24564	19667	5.151	Ningshan County	Ankang City	0.091083
2018	89	0.432566	7.03	9.83155	0.00328787	120909	4.51213	6575.85	86.2433	0.644438	485.633	0.0275418	0.353187	0.00205038	0.245392	12127	2.972	Ningshan County	Ankang City	0.102364
2019	89	0.534993	7.05	9.94693	0.00365835	138176	3.28482	7939.82	62.9636	0.642555	485.674	0.0273519	0.5221	0.00233645	0.245177	12394	2.965	Ningshan County	Ankang City	0.142024
2020	89	0.582611	5.99	9.86461	0.00357195	153656	4.6344	8283.75	66.1773	0.640684	573.289	0.411026	0.720148	0.00407688	0.244987	12661	3.007	Ningshan County	Ankang City	0.16207
2021	89	0.481962	4.93	10.2793	0.00518233	145318	5.98397	12928.7	126.971	0.0902202	4946.45	0.402537	0.395642	0.0005741	0.244819	12928	3.049	Ningshan County	Ankang City	0.123316
2012	90	0.170239	34	11.909	0.00335041	155396	1.59941	86.9924	246.733	0.0979395	716.765	0.0486956	0.355053	0.000574477	0.228041	106868	42.147	Ziyang County	Ankang City	0.030687
2013	90	0.173713	35	13.4579	0.00317772	178088	1.85114	5361.94	289.241	0.0984282	692.829	0.0475479	0.303386	0.000659821	0.234667	108375	42.152	Ziyang County	Ankang City	0.03562
2014	90	0.256379	34	12.5982	0.00375629	192301	2.19353	977.333	332.946	0.0983876	713.5	0.0469892	0.27022	0.000659549	0.239499	109089	42.022	Ziyang County	Ankang City	0.067346
2015	90	0.342543	34	12.8725	0.00373996	210080	2.36759	1274.64	359.286	0.0984039	713.382	0.0441915	0.260308	0.000700886	0.254569	111311	42.459	Ziyang County	Ankang City	0.10249
2016	90	0.370905	33.7	13.233	0.00303061	227310	2.69347	1369.87	405.223	0.0993005	713.234	0.042386	0.278818	0.000707272	0.256516	111499	42.083	Ziyang County	Ankang City	0.103948
2017	90	0.45216	28.72	12.9601	0.0042882	265788	3.68994	8121.1	462.725	0.105186	790.077	0.0454303	0.271666	0.000793266	0.258184	112260	41.935	Ziyang County	Ankang City	0.119431
2018	90	0.619421	28.67	12.8066	0.00337692	299279	3.82251	14872.3	489.247	0.105713	787.513	0.0363898	0.282945	0.000885818	0.25963	102996	38.746	Ziyang County	Ankang City	0.142013
2019	90	0.664227	28.7	12.6147	0.00353624	435244	3.52784	21623.6	448.794	0.106245	782.753	0.0228032	0.336798	0.000979301	0.260895	105073	38.621	Ziyang County	Ankang City	0.166213
2020	90	0.786298	26.1	12.6045	0.00432388	465950	4.13196	22716.8	481.447	0.106782	856.398	0.0508726	0.0842419	0.00035791	0.262012	107150	38.2	Ziyang County	Ankang City	0.209263
2021	90	0.317611	23.5	12.8395	0.00518743	343931	4.73608	12384.7	376.384	0.139025	730.553	0.218105	0.252376	0.0013397	0.263004	109227	37.779	Ziyang County	Ankang City	0.056324
2012	91	0.118249	46	12.6094	0.00215088	212079	2.17413	7612.85	281.401	0.181339	790.457	0.19765	0.222434	0.000742554	0.222821	120091	45.323	Xunyang City	Ankang City	0.02678
2013	91	0.199365	46	14.3558	0.00203206	243039	2.44283	4727.67	317.34	0.181095	791.522	0.200205	0.20429	0.000796484	0.229066	122649	45.293	Xunyang City	Ankang City	0.049779
2014	91	0.355599	46	13.4849	0.00245428	262860	2.69769	55.7812	350.438	0.180441	794.391	0.189543	0.194448	0.000820973	0.233178	123708	45.169	Xunyang City	Ankang City	0.073257
2015	91	0.423885	46	13.5173	0.00227894	250293	2.99634	521.879	389.24	0.179909	796.739	0.185891	0.181131	0.000818554	0.248373	125482	45.582	Xunyang City	Ankang City	0.108076
2016	91	0.42212	45.82	14.2984	0.00199156	296845	3.48988	5155.9	451.483	0.179865	800.065	0.181288	0.208487	0.000845631	0.250102	126092	45.524	Xunyang City	Ankang City	0.115232
2017	91	0.464067	43.17	13.8811	0.00293118	329054	4.35454	3930.21	530.883	0.180155	847.811	0.179846	0.199772	0.000874317	0.251587	126397	45.365	Xunyang City	Ankang City	0.121977
2018	91	0.576185	43.47	13.6643	0.00216493	375535	4.32949	2704.52	528.238	0.179312	845.917	0.196814	0.223351	0.000924617	0.252876	115459	40.371	Xunyang City	Ankang City	0.134041
2019	91	0.64387	43.57	13.6188	0.0021912	399382	3.98163	1478.82	489.918	0.178477	847.923	0.192871	0.265166	0.000974448	0.254006	117778	40.221	Xunyang City	Ankang City	0.14379
2020	91	0.713387	35.79	13.4963	0.00276337	410610	5.68726	1895.88	566.892	0.17765	1037.05	0.0661715	0.0506894	0.000296368	0.255004	120097	40.23	Xunyang City	Ankang City	0.154262
2021	91	0.531753	28.01	13.5133	0.00372617	380289	7.39288	6666.9	113.555	0.476421	494.109	0.0379771	0.421567	0.000794798	0.255893	122416	40.239	Xunyang City	Ankang City	0.131313
2012	92	0.131753	24	11.2862	0.00320987	122745	2.14167	4126.11	190.782	0.223177	765.5	0.0634541	0.35017	0.000653168	0.237945	73628	24.885	Pingli County	Ankang City	0.029473
2013	92	0.185489	24	12.7098	0.00311196	142723	2.52458	2548.67	228.814	0.223664	763.833	0.0646804	0.303443	0.000709142	0.242282	74041	24.889	Pingli County	Ankang City	0.043471
2014	92	0.282202	23	11.934	0.00364589	161892	2.95348	2738.99	256.533	0.224214	795.087	0.06452	0.283555	0.000710888	0.245067	74132	24.771	Pingli County	Ankang City	0.050739
2015	92	0.353586	23	12.2183	0.00348209	164530	3.36435	2869.86	291.881	0.225882	789.217	0.0587532	0.259385	0.000771265	0.25454	76898	24.858	Pingli County	Ankang City	0.077946
2016	92	0.467479	23.27	12.6295	0.00293495	184149	3.76166	2893.37	330.514	0.22473	784.057	0.0565109	0.230497	0.000822143	0.256137	77631	24.816	Pingli County	Ankang City	0.105907
2017	92	0.519095	19.53	12.3367	0.00403806	202612	5.11116	3868.7	376.227	0.225088	932.719	0.0559726	0.225685	0.000878349	0.257507	78199	24.765	Pingli County	Ankang City	0.126658
2018	92	0.575625	19.59	12.1054	0.00334042	241096	5.33716	4844.03	392.371	0.220453	949.413	0.0723627	0.238639	0.000967794	0.258695	56507	17.276	Pingli County	Ankang City	0.13955
2019	92	0.651412	19.63	12.1008	0.00332775	266031	4.53875	5819.36	336.464	0.216005	966.989	0.0683262	0.304226	0.00105363	0.259735	57606	17.177	Pingli County	Ankang City	0.150094
2020	92	0.728835	18.13	11.9698	0.00406652	283384	5.73998	622.676	392.998	0.211733	1068.12	0.0192999	0.0449456	0.000206558	0.260653	58705	17.553	Pingli County	Ankang City	0.167641
2021	92	0.0607341	16.63	12.2815	0.00467388	231155	6.94122	3746.75	45.3172	0.829497	297.234	0.0213531	0.438667	0.000809225	0.26147	59804	17.929	Pingli County	Ankang City	0.011787
2012	93	0.176117	6	9.7065	0.00396888	58781	2.15833	2322.75	86.5063	0.316642	824.667	0.0522811	0.426093	0.000808407	0.219204	27180	9.302	Zhenping County	Ankang City	0.035301
2013	93	0.0817634	6	11.0828	0.00360854	71336	2.1	1449.53	80.2929	0.315494	827.667	0.0510909	0.475821	0.000805477	0.223654	27363	9.341	Zhenping County	Ankang City	0.019654
2014	93	0.0853751	6	10.3455	0.00451119	69333	2.26	1564.95	90.2796	0.315558	827.5	0.0517076	0.44194	0.000805639	0.228479	27056	9.351	Zhenping County	Ankang City	0.020215
2015	93	0.0879779	6	10.7166	0.00414599	74866	2.54333	1643.89	101.598	0.314544	830.167	0.0502288	0.414817	0.00100381	0.246523	27534	9.416	Zhenping County	Ankang City	0.020558
2016	93	0.0868533	5.94	10.7873	0.00375814	88460	3.2364	1657.45	127.678	0.317605	830.471	0.0485092	0.396128	0.00101358	0.24774	27871	9.419	Zhenping County	Ankang City	0.022518
2017	93	0.0832177	5.16	10.7008	0.00472811	90509	4.46277	2244.45	153.315	0.318056	954.651	0.0475151	0.367211	0.00101502	0.248783	27949	9.416	Zhenping County	Ankang City	0.016549
2018	93	0.089319	5.18	10.3564	0.00413523	101101	4.69955	2831.46	162.058	0.316195	956.564	0.0624881	0.382501	0.00100908	0.249687	21076	7.056	Zhenping County	Ankang City	0.018949
2019	93	0.10262	5.18	10.4427	0.00403467	123318	4.58875	3418.46	158.254	0.314355	962.162	0.0606765	0.427641	0.00100321	0.250479	21524	7.017	Zhenping County	Ankang City	0.022425
2020	93	0.108722	4.74	10.3382	0.00482751	129533	5.52516	3579.58	174.361	0.312536	1057.59	1.0882	0.725755	0.00379015	0.251177	21972	7.112	Zhenping County	Ankang City	0.024824
2021	93	0.469937	4.3	10.8179	0.00526176	123562	6.46157	969.471	225.766	0.0432707	8420.47	0.311017	0.340422	0.000331418	0.251797	22420	7.207	Zhenping County	Ankang City	0.06196
2012	94	0.339545	21	12.736	0.00217129	126000	1.97948	61.1229	285.636	0.120433	661.667	0.106505	0.29071	0.000935588	0.22492	56326	18.905	Baihe County	Ankang City	0.09834
2013	94	0.042315	21	14.3148	0.00241577	134567	2.29857	375.251	332.209	0.12052	661.19	0.103569	0.262735	0.000936262	0.229128	56706	18.9	Baihe County	Ankang City	0.011978
2014	94	0.0488726	21	13.494	0.00266631	142285	2.49667	46.1878	360.84	0.118707	671.286	0.101405	0.250301	0.000993119	0.231511	57364	18.846	Baihe County	Ankang City	0.013291
2015	94	0.0751601	21	13.5735	0.00245233	165400	2.83524	426.575	409.773	0.118707	671.286	0.10495	0.229763	0.000993119	0.248974	58180	18.729	Baihe County	Ankang City	0.017068
2016	94	0.0882489	21.39	14.3515	0.00226522	167503	3.15615	429.732	464.625	0.118716	659	0.100469	0.254242	0.00099319	0.248274	58376	18.706	Baihe County	Ankang City	0.022159
2017	94	0.085432	16.53	13.9541	0.00312272	200616	4.78969	582.333	544.897	0.118707	852.813	0.0958234	0.240125	0.00106406	0.247678	58900	18.683	Baihe County	Ankang City	0.019663
2018	94	0.124877	16.58	13.7202	0.00238264	228900	4.81568	734.934	549.511	0.118229	853.679	0.0976272	0.261249	0.00113042	0.247163	56726	17.397	Baihe County	Ankang City	0.027627
2019	94	0.32254	16.61	13.7592	0.002257	265050	4.27838	887.535	489.076	0.117755	855.569	0.0948838	0.31953	0.00119626	0.246715	57249	17.329	Baihe County	Ankang City	0.075986
2020	94	0.363337	16.28	13.5671	0.0032557	345566	4.86788	928.778	545.328	0.117285	876.413	0.274441	0.258875	0.000981217	0.246321	57772	17.513	Baihe County	Ankang City	0.083104
2021	94	0.570106	15.95	13.6024	0.00375826	295048	5.45739	6982.13	678.665	0.077552	1352.85	0.19602	0.233355	0.000695152	0.245971	58295	17.697	Baihe County	Ankang City	0.118165
2012	95	0.171298	53	10.1998	0.00237722	198269	2.4434	7175.79	405.501	0.246995	403.358	0.0650525	0.224941	0.000748433	0.204194	107590	35.4735	Shangzhou District	Shangluo City	0.033987
2013	95	0.192855	55	12.0244	0.00178025	212718	2.14	2472.72	440.307	0.248717	386	0.0608864	0.205015	0.000800754	0.208454	108103	32.9402	Shangzhou District	Shangluo City	0.053585
2014	95	0.410817	56	11.2703	0.00245257	245118	2.19464	2584.77	459.955	0.251777	374.5	0.0745846	0.20949	0.000810605	0.212435	81183	29.8535	Shangzhou District	Shangluo City	0.098493
2015	95	0.441367	56	11.3427	0.00236407	271961	2.43179	2695.41	509.319	0.251837	374.411	0.0934429	0.192574	0.00047694	0.240767	104620	26.7335	Shangzhou District	Shangluo City	0.108516
2016	95	0.433284	56.62	11.6733	0.00219591	310358	2.71123	2767.99	574.513	0.250107	372.872	0.0822482	0.167856	0.000473664	0.24032	105291	29.089	Shangzhou District	Shangluo City	0.113321
2017	95	0.466243	54.08	11.4968	0.00273819	313492	2.83858	3471.81	574.515	0.247389	394.675	0.079075	0.188043	0.000468516	0.239937	97768	28.758	Shangzhou District	Shangluo City	0.10349
2018	95	0.532649	54.05	11.2023	0.00229874	366900	2.95554	4175.62	586.632	0.246189	396.818	0.076336	0.203929	0.000466244	0.239605	90416	24.458	Shangzhou District	Shangluo City	0.130177
2019	95	0.654264	54.03	11.4193	0.00243047	413367	2.62581	4879.43	529.903	0.245001	398.89	0.0664537	0.247647	0.000463994	0.239314	91387	27.287	Shangzhou District	Shangluo City	0.156493
2020	95	0.761804	47.53	11.2808	0.00244842	333721	3.189	538.737	567.264	0.243825	455.628	0.176671	0.204522	0.000646472	0.239058	92358	30.116	Shangzhou District	Shangluo City	0.182809
2021	95	0.526646	41.03	11.3498	0.00353773	330218	3.75218	455.639	264.558	0.167857	766.683	0.184659	0.487506	0.000476841	0.238829	93329	32.945	Shangzhou District	Shangluo City	0.140433
2012	96	0.182427	46	9.97866	0.00243241	206015	1.88696	559.858	292.721	0.471959	688.5	0.111073	0.440037	0.000505194	0.215085	163415	42.9202	Luonan County	Shangluo City	0.029
2013	96	0.200078	46	11.8533	0.00186459	220265	2.13435	1751.43	325.3	0.470133	691.174	0.109514	0.400697	0.000534692	0.219899	168079	39.6602	Luonan County	Shangluo City	0.050998
2014	96	0.348811	46	11.0041	0.0024902	243928	2.15587	179.766	350.424	0.468689	693.304	0.125506	0.392947	0.000564405	0.223936	142081	36.9335	Luonan County	Shangluo City	0.08416
2015	96	0.454488	46	11.0367	0.00249252	266941	2.465	1894.73	400.671	0.467487	695.087	0.10893	0.34267	0.000469131	0.247106	162334	34.7802	Luonan County	Shangluo City	0.097199
2016	96	0.55744	46.33	11.3241	0.00238848	268070	2.95572	1964.29	483.039	0.466844	691.086	0.102824	0.275593	0.000468486	0.24781	164437	48.698	Luonan County	Shangluo City	0.124879
2017	96	0.582561	44.96	11.2514	0.00268517	283434	3.12823	2527.01	496.979	0.465072	714.858	0.105043	0.297061	0.000466708	0.248414	159840	48.047	Luonan County	Shangluo City	0.128871
2018	96	0.616931	44.94	10.9252	0.00235555	315306	3.35674	3089.74	524.936	0.463342	717.846	0.116305	0.308882	0.00049597	0.248937	123812	34.847	Luonan County	Shangluo City	0.142609
2019	96	0.723858	44.92	11.235	0.00255453	378919	2.63894	3652.46	418.873	0.461625	720.837	0.0993638	0.421737	0.000525015	0.249394	120869	34.708	Luonan County	Shangluo City	0.168729
2020	96	0.784742	36.75	11.0115	0.00251934	388746	3.7526	3791.92	487.307	0.45992	884.354	0.0482421	0.135347	0.000184615	0.249797	117926	34.569	Luonan County	Shangluo City	0.205668
2021	96	0.544893	28.58	11.1762	0.00355431	362289	4.86626	4341.68	233.463	1.21455	430.616	0.076794	0.379137	0.00138133	0.250155	114983	34.43	Luonan County	Shangluo City	0.14266
2012	97	0.318283	47	10.9798	0.00241312	197743	1.71872	549.666	228.515	0.16139	510.66	0.0794845	0.350187	0.000749969	0.221092	110726	32.7535	Shanyang County	Shangluo City	0.082441
2013	97	0.289691	47	12.7029	0.00188247	221761	2.32128	1868.86	270.184	0.161377	510.702	0.0794155	0.31478	0.000791568	0.22799	111477	30.7402	Shanyang County	Shangluo City	0.062815
2014	97	0.46782	47	11.961	0.00232673	252670	2.21383	1948.46	294.342	0.161451	510.468	0.102106	0.317626	0.000791931	0.231908	86812	28.8268	Shanyang County	Shangluo City	0.118645
2015	97	0.52322	47	12.0554	0.00216595	282617	2.58852	217.189	343.14	0.161565	510.106	0.0869827	0.274679	0.000500521	0.252452	101365	27.5668	Shanyang County	Shangluo City	0.126032
2016	97	0.541445	46.9	12.5321	0.00215379	317339	3.77825	211.168	408.345	0.161592	511.109	0.0874131	0.220172	0.000500605	0.252735	102559	36.738	Shanyang County	Shangluo City	0.127676
2017	97	0.487037	42.83	12.2435	0.00293676	338560	3.45442	1515.08	418.537	0.161639	559.514	0.0794698	0.234885	0.000500751	0.252978	107437	35.962	Shanyang County	Shangluo City	0.089742
2018	97	0.585981	42.81	11.9783	0.00230164	383229	3.57182	2819	432.47	0.161639	559.776	0.0958479	0.246746	0.000500751	0.25319	85740	27.461	Shanyang County	Shangluo City	0.134362
2019	97	0.694065	42.79	12.1559	0.00224794	520929	3.37284	4122.92	408.272	0.161639	560.037	0.0946003	0.28195	0.000500751	0.253375	85264	27.837	Shanyang County	Shangluo City	0.16741
2020	97	0.776503	36.18	12.0596	0.00251385	456509	4.74772	4365.39	485.853	0.161639	662.355	0.0978794	0.109357	0.00054248	0.253539	84788	28.213	Shanyang County	Shangluo City	0.192885
2021	97	0.371758	29.57	12.0298	0.00359318	390366	6.1226	1167.69	149.448	0.179588	729.422	0.0677128	0.377967	0.000278177	0.253685	84312	28.589	Shanyang County	Shangluo City	0.082852
2012	98	0.20473	31	10.971	0.00219067	156801	2.74194	1456.95	255.25	0.204086	393.065	0.0879328	0.33273	0.000492409	0.212408	65152	21.1268	Danfeng County	Shangluo City	0.050574
2013	98	0.101309	31	12.7101	0.00176007	173955	2.36129	56.2644	300.246	0.204455	392.355	0.0848646	0.286654	0.000739949	0.216602	65304	20.0201	Danfeng County	Shangluo City	0.023836
2014	98	0.382507	31	11.9498	0.00227267	195950	2.54645	529.148	323.79	0.204455	392.355	0.10508	0.276228	0.000739949	0.219321	51142	19.0601	Danfeng County	Shangluo City	0.100232
2015	98	0.454062	31	12.0005	0.0021508	208279	2.79586	553.527	355.496	0.20569	390	0.0882441	0.256153	0.000413565	0.246259	60140	18.5801	Danfeng County	Shangluo City	0.121457
2016	98	0.394541	31.47	12.4545	0.0021766	205532	3.89692	568.864	398.811	0.205215	385.065	0.0853838	0.218053	0.000412609	0.245952	61124	21.396	Danfeng County	Shangluo City	0.09505
2017	98	0.40959	29.97	12.246	0.0027953	230975	3.34938	440.086	406.272	0.206219	402.369	0.0848178	0.232281	0.000414628	0.24569	60907	21.074	Danfeng County	Shangluo City	0.094386
2018	98	0.433603	29.96	11.9184	0.00218625	270065	3.27163	311.309	402.043	0.206304	402.336	0.0960018	0.253148	0.0004148	0.245464	54374	19.095	Danfeng County	Shangluo City	0.093856
2019	98	0.468919	29.93	12.2242	0.0021966	387695	2.97176	182.531	364.82	0.20639	402.573	0.0995489	0.299282	0.000414972	0.245265	52979	18.348	Danfeng County	Shangluo City	0.108931
2020	98	0.54194	24.84	12.0955	0.00241782	343039	4.61594	113.639	408.175	0.206476	484.863	0.101756	0.202796	0.000498173	0.245091	51584	17.601	Danfeng County	Shangluo City	0.129015
2021	98	0.491692	19.75	12.1019	0.00330944	288395	6.26012	8553.44	194.381	0.175114	719.038	0.10574	0.458175	0.000492923	0.244936	50189	16.854	Danfeng County	Shangluo City	0.126523
2012	99	0.164171	24	12.2644	0.00223363	151406	2.24667	176.558	233.723	0.2605	589.708	0.0869065	0.422823	0.000565251	0.216086	61733	12.6134	Shangnan County	Shangluo City	0.042085
2013	99	0.169106	25	13.9388	0.00195846	163344	2.5356	3711.83	274.772	0.260776	565.52	0.0846228	0.356558	0.000707314	0.222942	62560	11.6667	Shangnan County	Shangluo City	0.043874
2014	99	0.29113	25	13.2444	0.002304	180405	2.7568	3893.56	298.743	0.260998	565.04	0.102773	0.346548	0.000707914	0.22558	49332	10.9601	Shangnan County	Shangluo City	0.075607
2015	99	0.325924	25	13.1962	0.00221637	204575	3.524	472.828	330.776	0.262634	561.52	0.0891082	0.323766	0.000569882	0.249734	56538	10.5601	Shangnan County	Shangluo City	0.084601
2016	99	0.381891	24.79	13.8033	0.00221383	203095	3.53126	4221.66	379.454	0.26185	567.971	0.0865598	0.273598	0.000568182	0.250334	57209	20.346	Shangnan County	Shangluo City	0.100791
2017	99	0.360764	22.55	13.5788	0.00298611	220051	3.89812	3089.2	381.026	0.261053	626.297	0.0823747	0.290407	0.000566452	0.250848	58938	20.716	Shangnan County	Shangluo City	0.088889
2018	99	0.384465	22.54	13.2159	0.00231814	249558	4.55679	1956.75	396.251	0.261572	625.333	0.154391	0.296496	0.000567577	0.251291	29095	10.342	Shangnan County	Shangluo City	0.095036
2019	99	0.442186	22.55	13.542	0.00250591	302595	3.61116	824.286	352.962	0.262092	623.814	0.133702	0.352222	0.000568707	0.251678	30882	10.864	Shangnan County	Shangluo City	0.095412
2020	99	0.51311	20.48	13.3217	0.00271506	284617	4.59258	8366.94	407.698	0.262615	685.498	0.271175	0.224099	0.00113968	0.252018	32669	11.386	Shangnan County	Shangluo City	0.101928
2021	99	0.740635	18.41	13.3166	0.00336844	267249	5.574	3269.43	248.678	0.15358	1303.97	0.246024	0.363246	0.000541531	0.25232	34456	11.908	Shangnan County	Shangluo City	0.166295
2012	100	0.185449	30	10.8921	0.002966	165662	2.26333	491.461	189.819	0.410058	718.633	0.0935655	0.32708	0.000602996	0.21659	92502	32.631	Zhen’an County	Shangluo City	0.047151
2013	100	0.181636	30	12.533	0.00226962	179351	2.58333	1415.52	222.254	0.409545	719.533	0.0929407	0.270795	0.000694895	0.221483	92941	32.391	Zhen’an County	Shangluo City	0.048758
2014	100	0.297435	30	11.7389	0.00277792	200995	2.797	152.183	240.637	0.402552	732.033	0.107442	0.255969	0.000683029	0.225173	75641	32.467	Zhen’an County	Shangluo City	0.05779
2015	100	0.388267	30	11.9328	0.00260473	214935	2.993	1566.57	257.499	0.403692	729.967	0.0951358	0.244217	0.00054797	0.249662	86613	33.692	Zhen’an County	Shangluo City	0.095614
2016	100	0.417742	30.47	12.2666	0.00229176	234659	3.47883	1623.34	303.986	0.406532	713.686	0.0926217	0.205891	0.000597811	0.24867	87690	33.625	Zhen’an County	Shangluo City	0.099454
2017	100	0.479537	28.01	11.9814	0.00321994	248095	3.96998	1211.11	318.896	0.408014	773.545	0.0916748	0.21575	0.000599991	0.247822	89283	34.148	Zhen’an County	Shangluo City	0.105896
2018	100	0.533455	28	11.7511	0.00280197	300157	3.78893	798.878	303.599	0.412315	765.75	0.108913	0.247088	0.000606315	0.247088	73279	29.154	Zhen’an County	Shangluo City	0.124312
2019	100	0.620951	27.98	11.7743	0.00290278	184795	3.1474	386.649	252.549	0.416707	758.22	0.114243	0.321639	0.000612774	0.246447	70928	28.055	Zhen’an County	Shangluo City	0.151113
2020	100	0.69794	25.5	11.7461	0.00305345	351628	3.93118	3216.39	287.405	0.421194	823.098	0.0741356	0.093117	0.000333508	0.245881	68577	26.956	Zhen’an County	Shangluo City	0.170367
2021	100	0.5899	23.02	11.8797	0.00446115	331255	4.71495	597.38	146.474	1.04238	368.419	0.0782623	0.214774	0.000825374	0.245379	66226	25.857	Zhen’an County	Shangluo City	0.13035
2012	101	0.143001	17	9.82866	0.00275606	120330	3.58529	6294.79	267.677	0.18788	498.882	0.126237	0.191175	0.000825374	0.212951	41842	12.4534	Zhashui County	Shangluo City	0.036637
2013	101	0.193044	16	11.5639	0.00219938	130799	4.1125	2164.3	281.862	0.18788	530.062	0.116063	0.196323	0.000825374	0.219967	42253	12.1801	Zhashui County	Shangluo City	0.04553
2014	101	0.349098	16	10.7116	0.00277124	134277	4.13562	2234.54	283.748	0.18788	530.062	0.13165	0.19849	0.000825374	0.22407	35792	12.0667	Zhashui County	Shangluo City	0.084846
2015	101	0.471865	16	10.9207	0.0027645	146775	4.67438	233.133	320.712	0.183848	541.688	0.114639	0.186223	0.000576901	0.247002	40946	12.1001	Zhashui County	Shangluo City	0.111885
2016	101	0.575334	16.37	11.1472	0.0024552	175435	4.5833	2431.27	321.527	0.183488	530.483	0.108661	0.175415	0.000575772	0.247681	41450	13.135	Zhashui County	Shangluo City	0.140415
2017	101	0.624987	15.72	10.9634	0.00311806	176416	4.74325	3181.22	319.726	0.183341	552.863	0.105966	0.203132	0.000575308	0.248263	42561	13.033	Zhashui County	Shangluo City	0.152942
2018	101	0.627409	15.71	10.6871	0.00276014	180294	5.32973	3931.17	359.048	0.183319	553.278	0.101042	0.204686	0.000575242	0.248767	43843	14.085	Zhashui County	Shangluo City	0.144677
2019	101	0.748546	15.71	10.8293	0.00288312	232062	4.87256	4681.12	328.216	0.183298	553.342	0.11089	0.249952	0.000575175	0.249209	39228	12.49	Zhashui County	Shangluo City	0.182198
2020	101	0.797668	13.84	10.7198	0.00288573	220381	7.28179	4881.84	417.11	0.183277	628.179	0.126195	0.196691	0.000575109	0.249599	34613	10.895	Zhashui County	Shangluo City	0.186185
2021	101	0.873989	11.97	10.9271	0.0044311	213100	9.69102	7431.12	417.11	0.183256	726.399	0.145543	0.196612	0.000575043	0.249946	29998	9.3	Zhashui County	Shangluo City	0.206239

## Sheet: Guanzhong
Year	id	Y	Total population at the end of the year(10,000 people)	Average annual temperature（℃）	Average annual precipitation	Local budget expenditures(10,000 yuan)	Population productivity (million yuan/person)	Effective irrigated area(ha)	Regional economic density(million yuan/square kilometer)	Protection Rate of Permanent Basic Farmland	Cultivated land area per capital (ha/million people)	Fertilizer Application Intensity	Proportion of Gross Output Value of Farming, Forestry, Animal Husbandry and Fishery	Total Mechanical Power per Unit Cultivated Land	Proportion of Per Capita Disposable Income of Rural Residents	Total Grain Output	Sown Area of Grain Crops	xian	County/District	Y2
2012	1	0.214798	52.4	13.0109	0.00192617	169283	4.4523	26267	7189.52	0.00697717	200.592	0.40922	0.105252	0.00171249	0.316399	61082	13.8067	Baqiao District	Xi’an City	0.018524
2013	1	0.320235	53.21	14.6867	0.00159294	190742	5.56451	24548.8	8290.6	0.00745295	184.928	0.371545	0.103893	0.00182215	0.322405	56370	13.2134	Baqiao District	Xi’an City	0.053844
2014	1	0.350186	53.6	13.8822	0.00214772	220305	5.47215	24385.5	9038.52	0.00793605	172.407	0.394736	0.102533	0.00171735	0.325769	52853	12.0734	Baqiao District	Xi’an City	0.097943
2015	1	0.406207	53.89	13.9703	0.00190118	295407	6.16589	24675.2	10239.8	0.00842083	161.607	0.385623	0.0926749	0.00183718	0.355582	54071	11.5801	Baqiao District	Xi’an City	0.118376
2016	1	0.441865	54.68	14.4933	0.0016231	272233	6.319	2454.65	10162.7	0.0139903	95.8669	0.361424	0.0991755	0.00276803	0.357092	52567	10.6867	Baqiao District	Xi’an City	0.103446
2017	1	0.558448	64.06	14.1027	0.00199597	293695	6.6867	14740.5	13200.3	0.0151523	75.5542	0.15075	0.0851446	0.00289256	0.3584	49645	10.339	Baqiao District	Xi’an City	0.132275
2018	1	0.44855	67.73	13.8741	0.00177212	330784	7.98479	27026.4	14816	0.0165248	65.5249	0.257327	0.0647444	0.00292925	0.359545	27673	5.42669	Baqiao District	Xi’an City	0.110339
2019	1	0.497795	70.39	13.8814	0.00219054	355428	6.94979	39312.3	15075.2	0.0197408	52.7774	0.0952844	0.0668998	0.00323015	0.360555	24684	4.71336	Baqiao District	Xi’an City	0.12743
2020	1	0.533937	102.1	13.4952	0.00222255	371532	5.39187	4265.59	16704.5	0.024511	29.3046	0.125789	0.0631908	0.00392714	0.361453	21695	4.52002	Baqiao District	Xi’an City	0.136869
2021	1	0.580216	133.81	13.7356	0.00301402	387636	3.83396	41293.3	18701.1	0.0323213	16.9569	0.166043	0.0589597	0.00519171	0.362256	18706	4.32669	Baqiao District	Xi’an City	0.15096
2012	2	0.232076	25.68	14.8082	0.00125451	139962	5.59735	6243.74	5785.73	0.357161	614.953	0.237032	0.205287	0.00107649	0.301672	81318	12.9601	Yanliang District	Xi’an City	0.051046
2013	2	0.321503	26.01	16.6441	0.00103206	166351	6.49596	5542.88	6909.02	0.359345	603.46	0.254144	0.192006	0.0012105	0.306774	85369	14.2467	Yanliang District	Xi’an City	0.061154
2014	2	0.39127	26.26	15.7115	0.00149549	186987	7.4158	5367.94	7962.38	0.360816	595.278	0.296767	0.181969	0.00121546	0.311998	81003	14.1667	Yanliang District	Xi’an City	0.099988
2015	2	0.476715	26.27	15.8646	0.00110815	220632	7.33723	5187.23	7845.02	0.364406	589.189	0.283978	0.192262	0.00122755	0.35411	88211	14.2734	Yanliang District	Xi’an City	0.130272
2016	2	0.459107	26.49	16.4675	0.000982144	230682	7.32125	324.263	7930.48	0.364901	583.503	0.296878	0.196771	0.00109983	0.354274	86790	13.9667	Yanliang District	Xi’an City	0.101983
2017	2	0.501461	29.47	15.9139	0.00160038	239536	8.15112	1773.84	9822.53	0.369008	518.663	0.329156	0.171781	0.00104678	0.354417	84826	14.019	Yanliang District	Xi’an City	0.090913
2018	2	0.591791	30.12	15.9325	0.0010479	217355	8.33453	3223.42	10226.9	0.37264	502.523	0.234793	0.178453	0.000858879	0.354542	120276	18.5134	Yanliang District	Xi’an City	0.088386
2019	2	0.625874	30.45	15.7446	0.00142616	224871	8.37635	4673	10429.8	0.371609	498.456	0.261294	0.191141	0.000724733	0.354653	114974	17.9001	Yanliang District	Xi’an City	0.096645
2020	2	0.605235	30.3	15.3432	0.00156114	209809	8.22112	3851.86	10186.1	0.370584	502.31	0.288123	0.212259	0.000591327	0.354752	109672	18.0001	Yanliang District	Xi’an City	0.081562
2021	2	0.6381	30.15	15.6253	0.00213098	194747	8.06589	2993.32	10829.7	0.369564	506.202	0.317677	0.215206	0.000458655	0.35484	104370	18.1001	Yanliang District	Xi’an City	0.092822
2012	3	0.285268	70.59	13.943	0.00148706	242058	2.99668	335.272	2309.36	0.327434	665.732	0.111185	0.221326	0.0011781	0.303095	351676	74.8404	Lintong District	Xi’an City	0.047756
2013	3	0.322041	71.39	15.7913	0.00125505	272237	3.17383	244.472	2473.66	0.328279	656.577	0.120119	0.227731	0.00121353	0.30802	326809	70.807	Lintong District	Xi’an City	0.052175
2014	3	0.426894	71.85	14.9153	0.00174768	293966	3.22129	252.133	2526.83	0.33097	647.07	0.124708	0.232543	0.00130962	0.313256	317870	68.987	Lintong District	Xi’an City	0.084558
2015	3	0.476548	71.11	14.9601	0.00140404	392195	2.74824	258.498	2099.85	0.33273	650.345	0.121146	0.286761	0.00132545	0.346273	328636	66.8337	Lintong District	Xi’an City	0.102886
2016	3	0.313258	71.55	15.5131	0.00123372	384236	2.55919	265.274	1999.08	0.335048	641.873	0.126064	0.310956	0.00101619	0.347652	316894	65.467	Lintong District	Xi’an City	0.073407
2017	3	0.311956	68.99	15.0499	0.00181409	406723	3.23578	358.821	2412.85	0.335516	664.763	0.131271	0.266145	0.000890186	0.348847	304775	63.695	Lintong District	Xi’an City	0.053564
2018	3	0.397851	69.69	15.0177	0.00133687	436318	3.48236	452.369	2593.1	0.336007	657.124	0.123598	0.253287	0.00088221	0.349894	329083	66.867	Lintong District	Xi’an City	0.074433
2019	3	0.497249	70.04	14.8678	0.00175636	458230	3.4652	545.917	2649.54	0.34855	630.311	0.117923	0.274475	0.000956407	0.350818	332607	66.7403	Lintong District	Xi’an City	0.094459
2020	3	0.554005	67.6	14.4439	0.00170752	465366	3.73566	558.726	2756.97	0.362066	628.683	0.138883	0.289328	0.00099583	0.35164	336131	66.807	Lintong District	Xi’an City	0.100687
2021	3	0.597727	65.16	14.6789	0.00250787	472502	4.00612	572.543	2864.4	0.376672	626.934	0.159409	0.303067	0.00103843	0.352376	339655	66.8737	Lintong District	Xi’an City	0.106916
2012	4	0.309897	102	11.0347	0.00300174	365362	3.55529	872.269	2295.19	0.104334	433.52	0.0825782	8.54842e-06	0.000949818	0.295399	368814	77.5588	Chang’an District	Xi’an City	0.078752
2013	4	0.370215	104	12.599	0.00275767	447600	3.54949	78.7346	2324.6	0.105867	419.029	0.0842158	8.39776e-06	0.00100966	0.301151	357700	73.7769	Chang’an District	Xi’an City	0.090918
2014	4	0.434866	106	11.7326	0.00301236	497307	3.96883	68.1847	2649.22	0.109899	396.038	0.0884161	9.50806e-06	0.0010243	0.304961	338400	69.995	Chang’an District	Xi’an City	0.104311
2015	4	0.440786	106.53	11.9838	0.00300526	534331	4.81265	496.149	3228.53	0.111363	388.886	0.07898	8.09454e-06	0.00103795	0.324722	345885	6.72336	Chang’an District	Xi’an City	0.111037
2016	4	0.50028	108.3	12.2473	0.00274974	612604	5.61422	246.934	3828.84	0.117229	363.389	0.0658454	7.07214e-06	0.00111803	0.325903	332415	65.5461	Chang’an District	Xi’an City	0.115824
2017	4	0.433415	100.97	12.0376	0.00298489	530795	7.83437	209.067	4981.3	0.143212	319.055	0.0663575	4.93028e-06	0.00108645	0.326927	265260	53.2133	Chang’an District	Xi’an City	0.112374
2018	4	0.336587	104.28	11.6014	0.00301288	569454	8.71798	171.201	5724.87	0.147733	299.473	0.102572	2.63994e-06	0.00112075	0.327822	156242	30.9421	Chang’an District	Xi’an City	0.074941
2019	4	0.416562	106.42	11.8426	0.00325898	504679	9.49	133.334	6304.85	0.14762	293.676	0.0988585	2.69674e-06	0.00115189	0.328611	157518	26.3732	Chang’an District	Xi’an City	0.095526
2020	4	0.555117	158.6	11.4573	0.00334963	493600	7.16425	117.152	7155.23	0.147507	197.207	0.0952051	1.73377e-05	0.00118298	0.329313	158794	27.4649	Chang’an District	Xi’an City	0.133776
2021	4	0.664361	210.78	11.8708	0.00453012	482521	4.8385	1.26135	7988.99	0.147394	148.501	0.0916099	2.89102e-05	0.00121402	0.329941	160070	28.1541	Chang’an District	Xi’an City	0.167606
2012	5	0.166477	65	10.5008	0.0025264	169720	1.47277	164493	486.186	0.142746	621.538	0.125449	0.419423	0.000717822	0.281631	289759	65.707	Lantian County	Xi’an City	0.026165
2013	5	0.193249	65	12.1283	0.00203328	234900	1.64446	144221	542.864	0.144611	613.523	0.136398	0.407962	0.000752276	0.286916	264600	64.0937	Lantian County	Xi’an City	0.028902
2014	5	0.127066	66	11.3581	0.00265021	251369	1.7947	123948	590.479	0.145143	602.015	0.187618	0.390393	0.000780208	0.293069	250600	63.8337	Lantian County	Xi’an City	0.03075
2015	5	0.165248	65	11.4636	0.00257095	301002	1.73969	103675	563.709	0.145337	610.462	0.177435	0.411745	0.00078125	0.31141	260422	63.2403	Lantian County	Xi’an City	0.041634
2016	5	0.268741	65.53	11.7601	0.00221773	356183	1.86846	83402.4	610.369	0.384643	228.796	0.180803	0.402253	0.00226772	0.314611	255720	62.887	Lantian County	Xi’an City	0.07357
2017	5	0.242394	53.26	11.5847	0.00267765	357590	2.69414	63129.6	715.304	0.146936	736.913	0.184239	0.375653	0.000636975	0.317376	253850	62.208	Lantian County	Xi’an City	0.047699
2018	5	0.277026	53.68	11.2888	0.00244346	387317	2.94212	42856.9	786.79	0.147398	728.856	0.274354	0.313044	0.000638978	0.319787	170353	40.3002	Lantian County	Xi’an City	0.048319
2019	5	0.320958	53.61	11.4123	0.00272959	427514	2.78362	22584.1	743.937	0.147882	727.42	0.268544	0.346505	0.000641075	0.32191	171041	40.2135	Lantian County	Xi’an City	0.070872
2020	5	0.359312	49.2	11.165	0.00280175	444300	2.95692	2311.38	712.68	0.148369	790.02	0.265931	0.377799	0.000643186	0.323792	171729	40.1269	Lantian County	Xi’an City	0.073299
2021	5	0.411712	44.79	11.4453	0.00388835	634387	3.13021	2359.75	756.25	0.148859	864.948	0.263338	0.371202	0.000645311	0.325472	172417	40.0402	Lantian County	Xi’an City	0.084351
2012	6	0.186673	67	9.7847	0.00346537	252265	1.16836	10279.6	265.446	0.131508	496.373	0.193146	0.527363	0.00126289	0.278586	243158	52.0536	Zhouzhi County	Xi’an City	0.035694
2013	6	0.257043	68	11.3538	0.00333917	248600	1.28912	9015.75	297.253	0.131484	489.162	0.20368	0.524861	0.00129273	0.28509	230700	52.6803	Zhouzhi County	Xi’an City	0.051703
2014	6	0.413785	69	10.4675	0.00342017	284284	1.48696	7751.87	327.383	0.13146	482.159	0.150052	0.496376	0.00135261	0.289513	224955	51.3403	Zhouzhi County	Xi’an City	0.099069
2015	6	0.395752	68	10.8985	0.00310335	341695	1.53294	6487.99	350.488	0.132705	484.662	0.208106	0.489049	0.00145644	0.307803	231714	49.8469	Zhouzhi County	Xi’an City	0.091811
2016	6	0.497183	68.94	11.003	0.00290529	380428	1.66797	5224.11	387.302	0.110799	572.57	0.237103	0.49798	0.00121602	0.312152	222595	48.6602	Zhouzhi County	Xi’an City	0.119148
2017	6	0.452151	58.94	10.8232	0.00330402	398852	2.278	3960.23	452.206	0.133178	557.177	0.255388	0.44053	0.00100487	0.315902	206556	45.097	Zhouzhi County	Xi’an City	0.072771
2018	6	0.415334	59.41	10.279	0.00355655	458309	2.46243	2696.35	492.657	0.133654	550.8	0.443125	0.403087	0.00106958	0.31917	119095	25.5468	Zhouzhi County	Xi’an City	0.048848
2019	6	0.462874	59.29	10.5203	0.00370936	424000	2.31326	1432.47	465.673	0.134055	550.261	0.436035	0.471329	0.00104215	0.322043	120206	25.5001	Zhouzhi County	Xi’an City	0.051541
2020	6	0.559059	55.7	10.1866	0.00366098	428194	2.53411	168.595	473.448	0.134459	583.968	0.432025	0.504346	0.00101454	0.324588	121317	25.3268	Zhouzhi County	Xi’an City	0.063485
2021	6	0.620769	52.11	10.7394	0.0044697	435722	2.75496	1765.47	497.046	0.134865	622.318	0.428088	0.519224	0.000986771	0.326859	122428	25.1535	Zhouzhi County	Xi’an City	0.068797
2012	7	0.0762952	31	14.8911	0.00128075	162754	7.36	12549.9	7760.54	0.233109	491.742	0.532021	0.1468	0.00170559	0.31267	200246	31115.7	Gaoling District	Xi’an City	0.014519
2013	7	0.188469	32	16.8518	0.00105553	184100	8.74813	12748.2	9521.77	0.23383	474.906	0.384834	0.142707	0.00177667	0.318533	198200	29999	Gaoling District	Xi’an City	0.041704
2014	7	0.356537	33	15.9151	0.00150445	202716	9.93636	12946.5	10207.1	0.234927	458.364	0.241698	0.156	0.00185112	0.322661	190374	28882.3	Gaoling District	Xi’an City	0.077718
2015	7	0.52412	33	15.9507	0.00120492	255373	8.83333	13144.8	9911.56	0.235706	456.848	0.0817195	0.170025	0.00192359	0.356479	192757	27765.6	Gaoling District	Xi’an City	0.133557
2016	7	0.521244	33.22	16.5735	0.00106617	232310	9.37929	13343	10212.2	0.0948438	1127.84	0.0745824	0.185161	0.000667254	0.358013	187779	26648.9	Gaoling District	Xi’an City	0.118695
2017	7	0.583885	35.7	16.0439	0.00165236	253141	1.56325	13541.3	12826.5	0.243308	409.104	0.0774746	0.161121	0.00143786	0.359342	179220	25532.2	Gaoling District	Xi’an City	0.104729
2018	7	0.570001	36.26	16.0645	0.00114133	340275	1.43713	13739.6	12872.4	0.239989	408.356	0.107617	0.127601	0.00148578	0.360505	123558	24415.5	Gaoling District	Xi’an City	0.134907
2019	7	0.633406	36.71	15.8387	0.00157977	356266	1.19995	13937.9	12736.1	0.240622	402.288	0.104144	0.141259	0.00155742	0.361531	122926	23298.8	Gaoling District	Xi’an City	0.144152
2020	7	0.7518	44.2	15.2236	0.00154637	280141	8.47262	14136.2	12737.8	0.241259	333.235	0.100635	0.15353	0.00162944	0.362443	122294	22182.2	Gaoling District	Xi’an City	0.171784
2021	7	0.824991	51.69	15.4665	0.002271	204016	15.7453	14485.9	13085.7	0.2419	284.194	0.0970887	0.16141	0.00170184	0.363258	121662	21065.5	Gaoling District	Xi’an City	0.188855
2012	8	0.180652	60	11.1247	0.00324075	213234	2.36883	27915.4	1108.66	0.203015	636	0.13956	0.286434	0.00112683	0.300056	313700	20.9289	Huyi District	Xi’an City	0.023199
2013	8	0.241046	61	12.6897	0.00321217	236100	2.54492	2643.59	1210.92	0.203854	623	0.136506	0.288037	0.00121043	0.305157	303400	11.3607	Huyi District	Xi’an City	0.040499
2014	8	0.375202	61	11.7542	0.00326156	269178	2.65582	276.423	1263.34	0.206395	615.328	0.131929	0.29741	0.00133209	0.311334	296007	10.7925	Huyi District	Xi’an City	0.09604
2015	8	0.44566	61	12.0849	0.0031336	338906	2.47279	27544.9	1179.36	0.206472	615.098	0.120311	0.328928	0.00133259	0.343327	304943	7.77564	Huyi District	Xi’an City	0.132011
2016	8	0.459458	61.22	12.3288	0.0029919	402850	2.65959	287.987	1273.03	0.235609	537.096	0.115268	0.316609	0.000638667	0.343551	297776	17.3438	Huyi District	Xi’an City	0.12799
2017	8	0.502886	54.93	12.1016	0.00326143	407011	3.59385	18702.4	1382.42	0.219812	641.617	0.11881	0.251459	0.00139031	0.343745	269000	26.912	Huyi District	Xi’an City	0.130553
2018	8	0.438921	55.86	11.563	0.00344784	430239	3.88937	37116.9	1740.87	0.229985	603.025	0.165962	0.206063	0.00148434	0.343916	191315	36.4802	Huyi District	Xi’an City	0.110716
2019	8	0.520301	56.46	11.8835	0.00350026	358400	3.19217	55531.3	1444.15	0.230245	595.944	0.156871	0.268967	0.00148602	0.344068	195893	37.2069	Huyi District	Xi’an City	0.126023
2020	8	0.723008	57.7	11.5035	0.00360737	387000	4.48717	54712.6	1871.88	0.230505	582.478	0.153089	0.223376	0.0014877	0.344203	200471	31.3735	Huyi District	Xi’an City	0.160544
2021	8	0.832181	58.94	11.9951	0.00458257	415600	5.78217	53891.6	2131.81	0.230766	569.579	0.149476	0.210072	0.00148938	0.344324	205049	25.5401	Huyi District	Xi’an City	0.183864
2012	9	0.129187	60	9.88722	0.00250735	148600	2.52567	6799.6	613.026	0.275565	752.833	0.129914	0.243794	0.000774851	0.250455	240560	58.41	Chencang District	Baoji City	0.024368
2013	9	0.217205	61	11.6679	0.00230089	175936	2.67656	6238.37	659.021	0.276091	739.082	0.135894	0.247819	0.00082069	0.255526	231078	58.895	Chencang District	Baoji City	0.053744
2014	9	0.343464	60.46	10.8671	0.00239424	183899	2.87198	6263.88	702.427	0.276803	743.764	0.136659	0.241854	0.000911759	0.258431	224800	58.118	Chencang District	Baoji City	0.077975
2015	9	0.315609	60	11.187	0.00228854	234520	2.462	6277.83	597.573	0.276711	749.717	0.13365	0.292105	0.000955917	0.253798	233370	58.102	Chencang District	Baoji City	0.082833
2016	9	0.36131	60.7	11.554	0.00195802	208099	2.71466	15769.2	666.586	0.279087	734.761	0.136975	0.272865	0.000852018	0.254845	226699	57.437	Chencang District	Baoji City	0.083667
2017	9	0.426023	60.5	11.2192	0.00240711	181800	3.16336	13320.7	788.546	0.280029	734.711	0.141568	0.238497	0.00087739	0.25575	224139	57.425	Chencang District	Baoji City	0.086145
2018	9	0.39627	60.39	10.764	0.00244382	204100	3.52449	10872.1	876.984	0.280844	733.913	0.165176	0.188022	0.000925069	0.25654	197274	50.892	Chencang District	Baoji City	0.081559
2019	9	0.571283	60.25	10.7872	0.00271608	235300	3.55867	8423.57	883.42	0.285646	723.253	0.149701	0.209541	0.000940885	0.257236	203032	50.799	Chencang District	Baoji City	0.125366
2020	9	0.763197	47.92	10.5352	0.00321644	256600	4.62644	8488.99	908.771	0.290614	893.802	0.135078	0.225947	0.000957251	0.257853	208790	50.706	Chencang District	Baoji City	0.169163
2021	9	0.928933	35.59	10.92	0.00319631	268500	5.69421	8528.38	994.512	0.295758	1182.52	0.121241	0.226799	0.000974196	0.258404	214548	50.613	Chencang District	Baoji City	0.213066
2012	10	0.257941	32	10.319	0.0036654	141403	2.41219	1721.29	894.438	0.134163	723.656	0.301669	0.376694	0.000820486	0.236635	134187	24.89	Mei County	Baoji City	0.050831
2013	10	0.354144	33	11.8603	0.00347558	149695	2.74455	156.237	1056.83	0.133984	702.667	0.328446	0.366317	0.000862515	0.241796	126030	23.401	Mei County	Baoji City	0.080182
2014	10	0.459095	33	11.0266	0.00348953	164704	3.17667	15543.7	1220.89	0.13414	701.848	0.33267	0.347224	0.000949873	0.245907	126173	22.594	Mei County	Baoji City	0.115766
2015	10	0.414973	33	11.392	0.00313553	179783	3.2397	15624.2	1246.04	0.133707	704.121	0.356689	0.351387	0.000989843	0.241458	123284	22.308	Mei County	Baoji City	0.098499
2016	10	0.432745	32.83	11.6744	0.00287616	190612	3.51843	13839.6	1346.27	0.134059	705.909	0.374404	0.334787	0.000949299	0.242647	117587	21.566	Mei County	Baoji City	0.107554
2017	10	0.481326	30.5	11.3509	0.00314599	196631	4.22689	15623.8	1502.56	0.134071	759.77	0.379866	0.303168	0.00103569	0.243675	116083	21.28	Mei County	Baoji City	0.107319
2018	10	0.421539	30.43	10.8787	0.00380421	209778	4.51584	17408.1	1596.51	0.134082	761.453	0.614557	0.279431	0.00107893	0.244574	72501	13.112	Mei County	Baoji City	0.054497
2019	10	0.513339	30.36	11.0435	0.00395849	212092	5.31122	19192.3	1878.96	0.134372	761.561	0.609617	0.257477	0.00181653	0.245366	73228	13.087	Mei County	Baoji City	0.06808
2020	10	0.624332	28.12	10.8999	0.0038222	218675	6.29498	1937.39	2063.11	0.134664	820.448	0.604773	0.252756	0.00255732	0.24607	73955	13.062	Mei County	Baoji City	0.083062
2021	10	0.737367	25.88	11.3043	0.00429361	225258	7.27873	19489.9	2328.64	0.134956	889.529	0.600024	0.240113	0.00330133	0.246699	74682	13.037	Mei County	Baoji City	0.099005
2012	11	0.100383	44	12.268	0.0018477	153399	1.86227	182.449	1160.99	0.594425	754.523	0.195119	0.366186	0.00120486	0.238118	280526	47.89	Fufeng County	Baoji City	0.009645
2013	11	0.216794	45	13.8692	0.00170869	162189	2.114	1637.33	1349.36	0.603219	727	0.193613	0.346812	0.00128381	0.24331	273050	48.471	Fufeng County	Baoji City	0.053666
2014	11	0.349602	45	13.0489	0.00213601	176399	2.23489	16454	1426.52	0.609178	719.889	0.191794	0.348714	0.00132737	0.247458	265514	48.427	Fufeng County	Baoji City	0.082787
2015	11	0.401086	45	13.1552	0.00191132	201819	2.17489	16523.2	1388.23	0.620537	706.711	0.179795	0.369681	0.00138356	0.241704	280898	48.484	Fufeng County	Baoji City	0.102297
2016	11	0.42346	45.13	13.7904	0.00158124	218789	2.39663	631.314	1534.18	0.632977	690.826	0.182936	0.346637	0.0011547	0.242886	272954	47.899	Fufeng County	Baoji City	0.117727
2017	11	0.499801	42.37	13.3056	0.00208788	222691	2.94195	7835.42	1768.09	0.639935	727.826	0.179286	0.307487	0.00136196	0.243908	269563	47.916	Fufeng County	Baoji City	0.126427
2018	11	0.537284	42.26	12.8238	0.00211562	236639	3.39789	15039.5	1984	0.644681	724.349	0.188909	0.258162	0.00143739	0.244802	257351	45.264	Fufeng County	Baoji City	0.131692
2019	11	0.627944	42.15	12.9696	0.00222877	251675	3.49897	22243.6	2087.11	0.64601	724.745	0.189227	0.257759	0.00114574	0.24559	256168	45.184	Fufeng County	Baoji City	0.152815
2020	11	0.756368	31.32	12.8398	0.00248101	258200	4.93317	2241.96	2191.58	0.647345	973.34	0.189548	0.257235	0.000852878	0.24629	254985	45.104	Fufeng County	Baoji City	0.176573
2021	11	0.870617	20.49	13.0526	0.00279041	264725	6.36737	22491.4	2461.96	0.648686	1484.72	0.189872	0.239456	0.000558806	0.246915	253802	45.024	Fufeng County	Baoji City	0.193439
2012	12	0.403667	51	10.9678	0.00174287	159456	2.79546	14834.4	1212.98	0.477998	905.51	0.139911	0.236721	0.000822849	0.255917	270408	55.873	Fengxiang District	Baoji City	0.101598
2013	12	0.437645	52	12.7246	0.0016463	176949	3.11462	13654.5	1373.71	0.47641	891.058	0.152976	0.229181	0.00088486	0.261562	260048	56.132	Fengxiang District	Baoji City	0.069563
2014	12	0.509976	53	11.9003	0.00194458	190019	3.43377	13777.1	1542.07	0.47644	874.189	0.165003	0.218919	0.000928084	0.265404	256353	55.271	Fengxiang District	Baoji City	0.093118
2015	12	0.469383	52.26	12.0899	0.00175558	220305	3.59285	13723.7	1592.54	0.481838	876.636	0.163894	0.216678	0.000960426	0.260672	264037	55.007	Fengxiang District	Baoji City	0.096938
2016	12	0.303503	53	12.5819	0.00148016	245255	3.81275	16613.5	1713.66	0.482776	862.717	0.168539	0.208859	0.000787333	0.261734	256439	54.341	Fengxiang District	Baoji City	0.054208
2017	12	0.32724	52.68	12.1852	0.00190658	197257	3.96453	11699	1771.42	0.484227	865.357	0.17144	0.206964	0.000811635	0.262654	253150	54.301	Fengxiang District	Baoji City	0.054465
2018	12	0.366376	49.21	11.7915	0.00184924	210928	4.45598	6784.43	1838.84	0.480893	932.798	0.167782	0.185598	0.000806048	0.263458	256816	55.357	Fengxiang District	Baoji City	0.06843
2019	12	0.409426	48.98	11.7489	0.00196312	220638	4.56625	1869.88	1896.99	0.483463	932.197	0.168525	0.196182	0.000657045	0.264167	255007	55.266	Fengxiang District	Baoji City	0.063603
2020	12	0.483642	48.75	11.5929	0.00263645	249320	4.91829	18746.8	2033.64	0.48606	931.59	0.169279	0.198178	0.000550479	0.264797	253198	55.175	Fengxiang District	Baoji City	0.065047
2021	12	0.527591	38.62	11.8239	0.00262688	278002	6.8435	18826.9	2241.7	0.488686	1169.63	0.170043	0.193556	0.00035421	0.26536	251389	55.084	Fengxiang District	Baoji City	0.071066
2012	13	0.321168	47	11.2915	0.0022631	141263	2.85128	744.328	1565.54	0.439522	749.723	0.0822358	0.241147	0.000681102	0.258596	275099	47.793	Qishan County	Baoji City	0.059663
2013	13	0.37634	48	12.9733	0.00200879	168248	3.1875	6443.27	1683.29	0.43956	734.042	0.093111	0.244239	0.000737924	0.264278	265060	48.626	Qishan County	Baoji City	0.061949
2014	13	0.494068	47.7	12.1019	0.00236481	172759	3.12579	6473.42	1741.82	0.439522	738.721	0.0924476	0.252105	0.00107841	0.268643	265783	48.292	Qishan County	Baoji City	0.093638
2015	13	0.269748	48	12.3033	0.00221684	203824	2.99688	6445.22	1680.49	0.439522	734.104	0.0925391	0.267308	0.00105003	0.264089	270048	48.201	Qishan County	Baoji City	0.061312
2016	13	0.32956	47.36	12.8034	0.00190867	269664	3.29624	655.591	1823.71	0.439385	744.257	0.0939811	0.254235	0.000879483	0.264999	262308	47.593	Qishan County	Baoji City	0.069861
2017	13	0.429824	46.72	12.3951	0.00229459	251873	4.37457	3322.87	2203.62	0.438874	755.33	0.0943518	0.216541	0.000963473	0.265785	258649	47.526	Qishan County	Baoji City	0.072329
2018	13	0.404114	46.6	11.9418	0.00242996	261159	4.14372	5990.15	2255.81	0.438912	757.21	0.107025	0.202258	0.000963555	0.266472	226246	40.684	Qishan County	Baoji City	0.070939
2019	13	0.462911	46.48	12.0173	0.00252029	266868	3.8584	8657.43	2095.07	0.438937	759.122	0.110207	0.235452	0.00107698	0.267077	223824	40.612	Qishan County	Baoji City	0.077828
2020	13	0.553186	36.52	11.9512	0.00281355	262599	4.63189	8771.97	1975.4	0.438949	966.128	0.113459	0.268463	0.00119037	0.267614	221402	40.54	Qishan County	Baoji City	0.093234
2021	13	0.636384	26.56	12.181	0.00305246	258330	5.40538	886.458	2040.96	0.438962	1328.39	0.116782	0.277986	0.00130378	0.268094	218980	40.468	Qishan County	Baoji City	0.103568
2012	14	0.236766	27	8.99294	0.00234474	124368	1.63737	1735.58	190.162	0.25473	1306.7	0.114717	0.615781	0.000425158	0.246255	110803	33.622	Long County	Baoji City	0.063906
2013	14	0.20376	27	10.7252	0.00209643	130086	1.84747	1616.55	219.06	0.253615	1312.44	0.13144	0.574902	0.000451518	0.249429	101012	33.922	Long County	Baoji City	0.051219
2014	14	0.307338	27	9.99992	0.00234746	139004	2.11737	1646.93	251.032	0.253308	1314.04	0.134784	0.534113	0.000479157	0.251763	100101	32.679	Long County	Baoji City	0.065322
2015	14	0.296508	27	10.3015	0.00202375	154625	2.21475	166.659	262.538	0.253572	1312.67	0.129326	0.524709	0.000507872	0.238696	105230	32.73	Long County	Baoji City	0.081463
2016	14	0.339339	27.28	10.6721	0.00173141	173820	2.47617	2244.57	296.662	0.25378	1298.13	0.130602	0.487026	0.000423573	0.23972	103314	32.269	Long County	Baoji City	0.065998
2017	14	0.396204	25.29	10.3921	0.00206736	183691	3.35389	1601.22	372.508	0.254103	1398.5	0.14488	0.408836	0.000508935	0.240602	100000	31.944	Long County	Baoji City	0.053265
2018	14	0.423646	25.25	9.92996	0.0021587	183691	3.85827	957.876	427.849	0.254161	1400.4	0.140057	0.324543	0.00050905	0.24137	103672	32.3315	Long County	Baoji City	0.065849
2019	14	0.544727	25.2	9.97757	0.00239895	235636	3.63352	314.53	402.077	0.254297	1402.42	0.136045	0.375708	0.000707394	0.242044	104296	32.719	Long County	Baoji City	0.084161
2020	14	0.716158	20.85	9.66812	0.00284221	243907	4.73199	337.339	433.297	0.254434	1694.1	0.132082	0.376813	0.000905951	0.242641	104920	33.1065	Long County	Baoji City	0.102473
2021	14	0.858772	16.5	10.1094	0.00274097	252178	5.83046	35.8261	478.033	0.254571	2139.58	0.128165	0.367087	0.00110472	0.243173	105544	33.494	Long County	Baoji City	0.120785
2012	15	0.178079	13	10.6316	0.00187797	77806	1.99538	398.557	260.442	0.222775	2714.15	0.191074	0.542544	0.000340097	0.237268	61280	19.845	Qianyang County	Baoji City	0.045799
2013	15	0.20922	13	12.4439	0.00164994	84702	2.38538	384.924	311.033	0.423193	1428.77	0.228907	0.498833	0.000753742	0.240487	55053	19.506	Qianyang County	Baoji City	0.04176
2014	15	0.309447	13	11.7181	0.00194804	97571	2.69692	3813.16	351.655	0.423353	1428.23	0.230119	0.458103	0.000754026	0.244285	56297	19.004	Qianyang County	Baoji City	0.06667
2015	15	0.35048	13	11.896	0.00169192	104636	3.16238	384.568	412.337	0.423695	1427.08	0.213061	0.410275	0.000808538	0.231054	58908	18.559	Qianyang County	Baoji City	0.089331
2016	15	0.405364	13.46	12.3347	0.00145761	121453	3.61516	3928.13	488.064	0.422624	1381.8	0.218015	0.372561	0.00059143	0.232046	56707	18.238	Qianyang County	Baoji City	0.075631
2017	15	0.473966	12.59	11.9803	0.00179679	119431	4.31612	4416.63	545.035	0.42086	1483.48	0.223997	0.338653	0.000642501	0.232903	55023	17.867	Qianyang County	Baoji City	0.088212
2018	15	0.503758	12.57	11.681	0.00183157	129604	4.75481	4905.14	599.386	0.421763	1482.66	0.205448	0.276031	0.00064388	0.233651	57455	18.271	Qianyang County	Baoji City	0.1128
2019	15	0.622204	12.54	11.5835	0.00191056	143863	5.39838	5393.65	678.951	0.422966	1481.98	0.217702	0.27536	0.00102238	0.23431	57179	17.536	Qianyang County	Baoji City	0.116867
2020	15	0.784676	9.95	11.2494	0.00249676	148560	7.41939	5462.24	740.45	0.432222	1827.74	0.230076	0.281535	0.00142967	0.234894	56903	16.801	Qianyang County	Baoji City	0.120934
2021	15	0.864215	7.36	11.5693	0.00255338	153257	9.44039	5514.13	822.52	0.441893	2416.85	0.24257	0.279591	0.00185518	0.235417	56627	16.066	Qianyang County	Baoji City	0.125094
2012	16	0.324597	44.02	9.1551	0.00306593	122768	9.24943	14552	7007.92	0.0785932	395.048	0.272326	0.0155487	0.000460035	0.278352	26527	7.825	Weibin District	Baoji City	0.048251
2013	16	0.372955	44.18	10.8526	0.0028429	132242	9.67665	13273.5	7353.7	0.210138	147.216	0.335364	0.0162802	0.00123001	0.283389	22000	7.638	Weibin District	Baoji City	0.064465
2014	16	0.431154	43.48	10.012	0.00279098	157452	1.2569	13315.4	7671.26	0.21392	146.941	0.36155	0.016687	0.00125215	0.286676	20000	7.385	Weibin District	Baoji City	0.082545
2015	16	0.402132	43.63	10.4277	0.00280148	182538	1.77149	13341.8	8088.81	0.228972	136.81	0.104142	0.016461	0.00117273	0.268311	19896	6.704	Weibin District	Baoji City	0.094382
2016	16	0.256889	43.6	10.6352	0.0024089	182538	11.4794	1339.4	8614.46	0.230323	136.101	0.31577	0.0155512	0.00101112	0.268858	15866	5.509	Weibin District	Baoji City	0.069706
2017	16	0.300275	45.61	10.3799	0.00300847	165090	11.6459	1435.51	9142.34	0.245595	122.013	0.381069	0.0152322	0.00107817	0.269332	13512	4.768	Weibin District	Baoji City	0.070141
2018	16	0.345859	45.53	9.90377	0.0029721	188321	11.9987	1531.62	9402.75	0.25184	119.196	0.396675	0.0145742	0.00110558	0.269746	11788	3.924	Weibin District	Baoji City	0.076714
2019	16	0.375486	45.45	10.0165	0.0032727	183678	11.4662	1627.73	8969.71	0.267777	112.299	0.416412	0.0165261	0.00117555	0.27011	10127	3.553	Weibin District	Baoji City	0.088374
2020	16	0.430672	53.58	9.64799	0.0038194	197776	9.99235	14489.3	9214.97	0.269042	94.8115	0.443893	0.0173012	0.0011811	0.270434	8466	3.182	Weibin District	Baoji City	0.100034
2021	16	0.485858	61.71	10.1215	0.00421676	211874	8.51847	12693.9	9460.24	0.270319	81.9316	0.484791	0.0180362	0.00118671	0.270724	6805	2.811	Weibin District	Baoji City	0.111694
2012	17	0.223325	38.76	12.0264	0.00216917	116692	6.22423	8534.73	7807.44	0.400126	129.825	0.169109	0.015692	0.00258347	0.267238	36787	11.96	Jintai District	Baoji City	0.050469
2013	17	0.302062	38.47	13.9052	0.00217104	126698	7.16743	7853.69	8923.3	0.187331	279.387	0.180161	0.0149552	0.00130257	0.272671	34114	11.795	Jintai District	Baoji City	0.024695
2014	17	0.314582	38.26	13.1043	0.00220695	140635	7.72216	7993.22	9561.49	0.189714	277.392	0.164481	0.014747	0.00131914	0.274993	33019	11.684	Jintai District	Baoji City	0.0256
2015	17	0.445103	38.01	13.4109	0.00204814	168255	8.39463	899.629	9845.63	0.197861	267.719	0.137823	0.0148562	0.00137579	0.256608	36866	11.566	Jintai District	Baoji City	0.087826
2016	17	0.176927	37.79	13.927	0.00166674	168255	8.9574	874.285	10954.7	0.198917	267.849	0.133067	0.0141524	0.00118554	0.257144	35591	11.415	Jintai District	Baoji City	0.051628
2017	17	0.289473	40.13	13.4608	0.0022783	178504	8.91627	5362.18	11579.6	0.197415	254.149	0.1366	0.0135088	0.00127463	0.257608	35000	11.206	Jintai District	Baoji City	0.065546
2018	17	0.356649	39.98	12.8998	0.00221736	188139	9.27885	9850.08	11995.1	0.198818	253.302	0.117301	0.0116903	0.0012837	0.258013	38269	11.353	Jintai District	Baoji City	0.107731
2019	17	0.314078	39.83	12.9393	0.00246316	192089	9.16269	14338	11810.7	0.200043	252.699	0.125756	0.0127272	0.0012916	0.25837	35696	11.041	Jintai District	Baoji City	0.081091
2020	17	0.271507	46.1	12.6084	0.00332499	196936	7.86443	15726.7	11733	0.203316	214.816	0.135525	0.0136715	0.00131273	0.258687	33123	10.729	Jintai District	Baoji City	0.05445
2021	17	0.228936	52.37	12.8839	0.00304785	201783	6.56616	1789.85	11655.3	0.206697	186.003	0.146939	0.0146283	0.00133457	0.25897	30550	10.417	Jintai District	Baoji City	0.042136
2012	18	0.460683	53	14.1061	0.00140196	159800	2.22679	466.286	1490.15	1.87085	180.736	0.156461	0.536144	0.0041758	0.240141	257271	51.746	Jingyang County	Xianyang City	0.086908
2013	18	0.470409	54	16.0821	0.00128133	209128	2.51852	46.4358	1704.67	0.403651	822.167	0.160037	0.519537	0.00103611	0.246221	242444	51.531	Jingyang County	Xianyang City	0.118788
2014	18	0.565898	54	15.1756	0.00157016	218719	2.81537	382.566	1919.57	0.409555	810.315	0.152644	0.485296	0.00107411	0.249717	239839	50.815	Jingyang County	Xianyang City	0.143886
2015	18	0.700643	54	15.195	0.00135636	219136	2.96722	3794.86	2023.11	0.415798	798.148	0.138141	0.472235	0.00113689	0.255434	247212	50.469	Jingyang County	Xianyang City	0.147693
2016	18	0.630292	54.21	15.8157	0.00120943	247594	3.32712	3583.93	2260.61	0.422075	783.232	0.144404	0.441985	0.000847877	0.256386	240797	50.1	Jingyang County	Xianyang City	0.142853
2017	18	0.31682	31.66	15.2603	0.00180917	220301	2.39924	2538.89	1332.63	0.426739	1326.44	0.154195	0.695764	0.000928682	0.257209	163222	34.416	Jingyang County	Xianyang City	0.064166
2018	18	0.304227	31.48	15.2003	0.00136223	220964	2.39616	1493.84	1323.35	0.585516	972.268	0.137813	0.632339	0.00120887	0.257927	161015	33.443	Jingyang County	Xianyang City	0.05209
2019	18	0.321321	31.58	15.0683	0.00170691	230159	2.39837	448.799	1328.6	0.581715	975.522	0.169181	0.669584	0.00123349	0.25856	161058	33.384	Jingyang County	Xianyang City	0.061575
2020	18	0.348604	24.17	14.7596	0.00168149	254466	3.34741	466.747	1419.25	0.581715	1274.6	0.200533	0.66402	0.00126595	0.259121	161101	33.4202	Jingyang County	Xianyang City	0.076154
2021	18	0.415569	16.76	14.9816	0.00230421	278773	4.29646	3889.99	2048.74	0.581715	1838.13	0.231867	0.485766	0.00129841	0.259622	161144	33.4565	Jingyang County	Xianyang City	0.098831
2012	19	0.179668	42	14.0559	0.00137412	158501	2.86857	6719.63	2088.04	0.708749	733.5	0.156026	0.374099	0.000779044	0.239501	206504	42.11	Sanyuan County	Xianyang City	0.006139
2013	19	0.221202	43	16.021	0.00114554	184626	3.27465	6655.24	2440.38	0.657505	772.279	0.161499	0.347202	0.00084317	0.246371	200001	42.064	Sanyuan County	Xianyang City	0.047657
2014	19	0.380535	42	15.1047	0.00151536	188235	3.81262	6482.65	2775.22	0.659073	788.786	0.144318	0.317897	0.000875366	0.249868	195125	40.834	Sanyuan County	Xianyang City	0.102677
2015	19	0.461285	42	15.1485	0.00122426	222117	4.22929	6473.15	3078.51	0.660548	787.024	0.144318	0.289407	0.000937831	0.255258	201111	40.508	Sanyuan County	Xianyang City	0.126641
2016	19	0.408077	41.76	15.7627	0.00107098	219181	4.63386	6568.3	3353.73	0.66205	789.751	0.144217	0.274307	0.000697392	0.256026	196010	40.192	Sanyuan County	Xianyang City	0.112943
2017	19	0.459745	41.23	15.2392	0.00167363	238264	5.72617	7009.79	4091.68	0.66362	798.011	0.14963	0.229451	0.000759832	0.256691	194981	39.816	Sanyuan County	Xianyang City	0.101876
2018	19	0.461061	41.17	15.2609	0.00119468	256131	5.82355	7451.28	4155.21	0.664954	797.571	0.151083	0.197525	0.000761359	0.257272	188916	38.007	Sanyuan County	Xianyang City	0.134877
2019	19	0.503538	41.19	15.0808	0.0015454	279605	5.22816	7892.77	3732.2	0.66668	795.12	0.154907	0.238183	0.000763335	0.257783	188519	37.938	Sanyuan County	Xianyang City	0.140381
2020	19	0.623378	35.73	14.6603	0.00164772	282681	5.8147	7835.84	3600.67	0.667107	916.037	0.158748	0.265822	0.000763825	0.258237	188122	37.869	Sanyuan County	Xianyang City	0.155988
2021	19	0.731463	30.27	14.9059	0.00218422	285757	6.40123	745.493	4091.59	0.667536	1080.57	0.162605	0.250594	0.000764316	0.258642	187725	37.8	Sanyuan County	Xianyang City	0.171834
2012	20	0.28259	50	12.8973	0.00152011	168364	2.1724	2824.18	1074.38	0.0989199	653.76	0.721485	0.612492	0.000978953	0.25071	128485	27.37	Liquan County	Xianyang City	0.075062
2013	20	0.27302	50	14.7036	0.00149152	200351	2.5572	28271.4	1263.44	0.104813	617	0.899986	0.57032	0.00123177	0.257292	123113	27.41	Liquan County	Xianyang City	0.086677
2014	20	0.352879	51	13.8437	0.00173398	195649	2.84353	28647	1433	0.107665	588.882	0.902283	0.538964	0.00129857	0.260899	120041	26.865	Liquan County	Xianyang City	0.077286
2015	20	0.422187	51	13.8722	0.00154684	186524	2.97759	28767.2	1500.3	0.112021	565.98	0.854577	0.524929	0.00138576	0.266594	125138	26.613	Liquan County	Xianyang City	0.093031
2016	20	0.45571	48.42	14.5132	0.00133611	227528	3.39128	28723	1622.04	0.111979	596.365	0.812847	0.5185	0.000657986	0.26809	121414	26.336	Liquan County	Xianyang City	0.090666
2017	20	0.539241	45.68	14.0293	0.00191455	257975	3.81283	20306.5	1721.05	0.111986	632.093	0.745535	0.509552	0.000692665	0.269388	120158	26.036	Liquan County	Xianyang City	0.116391
2018	20	0.527533	45.58	13.7465	0.00165323	283000	3.52162	11889.9	1586.12	0.112017	633.304	0.711684	0.475343	0.000727499	0.270524	115859	25.51	Liquan County	Xianyang City	0.125476
2019	20	0.589749	45.38	13.7359	0.00182248	286032	3.38255	3473.4	1516.8	0.112115	635.544	0.741481	0.529635	0.00072813	0.271526	112282	25.333	Liquan County	Xianyang City	0.141347
2020	20	0.659157	36.56	13.5256	0.00184008	320209	4.27188	3445.72	1543.28	0.112185	788.375	0.77324	0.552556	0.000728585	0.272418	108705	25.156	Liquan County	Xianyang City	0.161811
2021	20	0.752662	27.74	13.7576	0.00253423	343536	5.16122	32534.6	1700.89	0.112255	1038.39	0.807159	0.530398	0.00072904	0.273216	105128	24.979	Liquan County	Xianyang City	0.186735
2012	21	0.195534	49.78	13.5037	0.00163259	148444	6.62997	28872.3	25644.1	0.0231598	578.284	0.215093	0.0721149	0.000694758	0.245197	70388	14.178	Qindu District	Xianyang City	0.039161
2013	21	0.262287	50.63	15.3286	0.00138169	176133	7.41244	2956	29160.1	0.064509	204.128	0.226047	0.0720637	0.00212869	0.251633	62770	13.549	Qindu District	Xianyang City	0.051267
2014	21	0.507625	50.45	14.3657	0.00192601	178070	8.42439	29515.9	33023.3	0.0669243	197.463	0.228217	0.0671984	0.00230877	0.254666	58922	13.101	Qindu District	Xianyang City	0.112071
2015	21	0.568289	51.16	14.4849	0.00177085	179622	9.11923	29298	36250.2	0.0749859	173.788	0.223859	0.0641716	0.00269936	0.259659	60011	12.895	Qindu District	Xianyang City	0.128633
2016	21	0.320809	52.02	15.0824	0.00154946	226998	9.98847	29446.9	40373	0.0782145	163.86	0.23447	0.0609963	0.002229	0.260464	56118	12.07	Qindu District	Xianyang City	0.083461
2017	21	0.342217	35.3	14.5607	0.00193035	225770	11.3598	20844.4	31157.7	0.0782145	241.473	0.261612	0.0328805	0.002229	0.261161	30056	6.365	Qindu District	Xianyang City	0.09028
2018	21	0.252366	35.12	14.2172	0.00165324	218498	1.93417	12242	29745.1	0.186594	101.737	0.301321	0.0340484	0.00307865	0.26177	24834	4.981	Qindu District	Xianyang City	0.050753
2019	21	0.303836	34.9	14.3049	0.00209801	222983	9.85244	3639.57	26717.2	0.18463	103.467	0.280018	0.0391275	0.00304625	0.262307	24752	4.328	Qindu District	Xianyang City	0.054281
2020	21	0.369451	49.16	13.9726	0.0019486	236490	7.36249	36529.1	28122.8	0.187539	72.3149	0.258573	0.0383312	0.00309423	0.262784	24670	3.675	Qindu District	Xianyang City	0.06488
2021	21	0.437722	63.42	14.2268	0.00265389	249997	4.87254	34919.5	29528.4	0.19054	55.1719	0.236986	0.0376107	0.00314376	0.26321	24588	3.022	Qindu District	Xianyang City	0.076808
2012	22	0.0912284	41.22	13.9431	0.00132385	118807	6.46385	223.935	9795.59	0	83.5274	0.0933045	0.0752875	0.00551844	0.243142	107594	21.886	Weicheng District	Xianyang City	0.018596
2013	22	0.169097	41.54	15.9011	0.00108345	134161	7.34762	2296.54	11221.3	0	315.936	0.0988821	0.0731656	0.00167632	0.248883	97237	21.279	Weicheng District	Xianyang City	0.047361
2014	22	0.265395	41.57	14.9033	0.00163757	149388	7.61198	22447.8	11633.5	0	304.547	0.0902842	0.0735408	0.00181675	0.252062	92962	20.663	Weicheng District	Xianyang City	0.059441
2015	22	0.300964	41.21	14.9585	0.0014793	158298	7.59743	22541.5	11510.7	0	301.407	0.0967908	0.0769536	0.00193221	0.257086	94916	20.309	Weicheng District	Xianyang City	0.07661
2016	22	0.240855	41.52	15.5931	0.00128337	192938	8.36848	22726.6	12680.1	0	291.426	0.0973792	0.0724735	0.00115702	0.258238	88941	19.123	Weicheng District	Xianyang City	0.048514
2017	22	0.249824	21.6	15.0449	0.00175724	148474	14.7374	16088.7	11173.5	0	553.889	0.0980522	0.0852158	0.00117018	0.259243	82966	17.937	Weicheng District	Xianyang City	0.052075
2018	22	0.358424	21.29	14.8049	0.00136151	134849	17.7886	9450.74	13923.5	0	555.566	0.0988297	0.0707686	0.00118363	0.260127	76991	16.751	Weicheng District	Xianyang City	0.071671
2019	22	0.352109	21.37	14.7885	0.00181285	115913	12.7192	2812.82	9433.46	0	547.122	0.0997381	0.107971	0.0011974	0.260912	71016	15.565	Weicheng District	Xianyang City	0.091266
2020	22	0.427552	30.35	14.4132	0.00162138	117126	9.46787	28378.8	10094.5	0	380.758	0.100813	0.104188	0.00121149	0.261613	65041	14.379	Weicheng District	Xianyang City	0.109066
2021	22	0.502995	39.33	14.6164	0.00241062	118339	6.21656	27274	10755.5	0	290.364	0.102106	0.10087	0.00122592	0.262242	59066	13.193	Weicheng District	Xianyang City	0.123599
2012	23	0.137414	60	12.7465	0.00150549	172992	1.815	2755.94	1077.67	1.87472	188.067	1.02371	0.394987	0.00283587	0.250203	268199	55.967	Qian County	Xianyang City	0.031409
2013	23	0.203165	60	14.401	0.00140311	196555	2.12167	2515.33	1268.3	0.412704	854.3	1.08899	0.366286	0.000721839	0.256788	253101	55.853	Qian County	Xianyang City	0.056591
2014	23	0.414261	60	13.5637	0.00183678	223096	2.41733	2637.31	1446.06	0.423808	831.917	0.338131	0.354046	0.000761294	0.260208	267077	54.853	Qian County	Xianyang City	0.10222
2015	23	0.456737	60	13.6159	0.00164641	228156	2.51233	2337.76	1502.89	0.436686	807.383	0.346174	0.355145	0.00080507	0.265953	262897	54.519	Qian County	Xianyang City	0.105399
2016	23	0.455802	59.92	14.3364	0.00132134	239018	2.79947	278.4	1618.94	0.453665	778.204	0.357548	0.342479	0.000621917	0.266355	255915	54.181	Qian County	Xianyang City	0.115607
2017	23	0.472004	53.66	13.8448	0.00189542	280015	3.3347	8301.26	1784.05	0.453548	869.214	0.44582	0.315442	0.000621757	0.266705	251617	53.82	Qian County	Xianyang City	0.102912
2018	23	0.524809	53.61	13.3453	0.00175703	290402	3.2396	16324.1	1731.27	0.450486	875.937	0.43917	0.290659	0.00061756	0.267012	254480	54.404	Qian County	Xianyang City	0.131802
2019	23	0.5549	53.57	13.4759	0.00187318	313800	3.23697	24347	1711.09	0.45089	875.807	0.447165	0.306254	0.000639427	0.267284	249713	54.264	Qian County	Xianyang City	0.141223
2020	23	0.64853	45.67	13.3266	0.0019851	320210	3.47515	2452.33	1551.56	0.449481	1030.52	0.455472	0.351163	0.000658678	0.267526	244946	54.124	Qian County	Xianyang City	0.158627
2021	23	0.768733	37.77	13.5503	0.00259407	327276	3.71333	23517.7	1752.84	0.448082	1249.96	0.464108	0.322715	0.000677808	0.267744	240179	53.984	Qian County	Xianyang City	0.177394
2012	24	0.0829009	46	12.5265	0.00193092	141676	1.61174	14477.7	1862.81	0.270436	1029.52	0.141023	0.395534	0.000506778	0.252778	210562	41.065	Wugong County	Xianyang City	0.014443
2013	24	0.193765	46	14.0692	0.00170644	165429	2.85652	1454.9	2410.55	0.482784	576.696	0.14274	0.336693	0.00113088	0.259219	200000	40.494	Wugong County	Xianyang City	0.04973
2014	24	0.377682	45	13.2363	0.00223772	172433	2.44533	14754.8	2764.82	0.478474	594.822	0.135396	0.31632	0.0011955	0.26233	197222	39.655	Wugong County	Xianyang City	0.101988
2015	24	0.428197	45	13.4367	0.00198411	195187	2.49889	14859.7	2825.38	0.476002	597.911	0.131252	0.322503	0.00126366	0.268422	203144	39.43	Wugong County	Xianyang City	0.102294
2016	24	0.460921	44.81	14.0582	0.00157348	209098	2.75521	14925.6	3096.73	0.475454	601.138	0.134579	0.312536	0.000965215	0.270092	198003	39.138	Wugong County	Xianyang City	0.114493
2017	24	0.503894	42.09	13.5393	0.00218716	225441	3.34759	16092.9	3540.2	0.475137	640.413	0.137128	0.289039	0.00100167	0.271545	194191	38.87	Wugong County	Xianyang City	0.107285
2018	24	0.545906	41.74	12.9976	0.00214164	247989	3.38376	17260.3	3548.69	0.474925	646.071	0.136631	0.255704	0.00103831	0.27282	194795	38.482	Wugong County	Xianyang City	0.137233
2019	24	0.645164	41.48	13.2049	0.00239419	277382	3.69226	18427.6	3848.12	0.474732	650.386	0.134572	0.255462	0.000593076	0.273949	197849	38.409	Wugong County	Xianyang City	0.146251
2020	24	0.765775	31.77	13.0502	0.00250643	273935	4.86575	18556.9	3884.05	0.464201	868.429	0.132576	0.272572	0.00014498	0.274954	200903	38.336	Wugong County	Xianyang City	0.167391
2021	24	0.91402	22.06	13.3223	0.00293881	275818	6.03925	17796.4	4305.28	0.454128	1278.42	0.13064	0.263471	0.000141834	0.275856	203957	38.263	Wugong County	Xianyang City	0.195906
2012	25	0.187634	61	13.149	0.00183251	177113	2.38328	22154.6	2858.27	0.519449	472.361	0.0752073	0.224153	0.00097175	0.236443	222957	43.576	Xingping City	Xianyang City	0.051829
2013	25	0.286456	62	14.8324	0.00158143	197989	2.82613	22248.3	3449.21	0.417967	577.581	0.0762287	0.206902	0.00086568	0.242574	222003	44.26	Xingping City	Xianyang City	0.070927
2014	25	0.386661	62	13.9102	0.00213611	210795	2.94793	22578.4	3597.83	0.429173	562.5	0.0780064	0.210646	0.000917563	0.245554	216995	43.151	Xingping City	Xianyang City	0.085725
2015	25	0.445868	62	14.0984	0.00193467	251300	3.91924	22647.4	3773.61	0.441204	547.161	0.0755633	0.202854	0.000972763	0.250944	224011	42.946	Xingping City	Xianyang City	0.111215
2016	25	0.471192	61.42	14.71	0.00162907	262500	3.54396	22777.5	4284.84	0.457901	532.188	0.0773515	0.19068	0.000703644	0.252389	218147	42.647	Xingping City	Xianyang City	0.098281
2017	25	0.563616	50.97	14.1838	0.00207742	285083	4.7343	24568.9	5322.52	0.475307	617.814	0.077351	0.163571	0.000730391	0.253644	194671	38.655	Xingping City	Xianyang City	0.135105
2018	25	0.600275	50.61	13.7284	0.001921	289400	4.96742	26360.4	5481.9	0.531797	556.115	0.0758352	0.13162	0.000710606	0.254745	186668	36.448	Xingping City	Xianyang City	0.129058
2019	25	0.626431	50.63	13.8902	0.00226329	308908	4.77274	28151.9	5334.3	0.533959	553.644	0.0818394	0.150921	0.00107024	0.255718	189432	36.386	Xingping City	Xianyang City	0.157421
2020	25	0.686599	46.33	13.6577	0.00219715	312416	5.22577	28395.6	5344.59	0.535373	603.432	0.0876709	0.166259	0.00143077	0.256585	192196	36.3828	Xingping City	Xianyang City	0.15356
2021	25	0.851973	42.03	13.9378	0.00281066	318002	5.6788	27276.4	6202.07	0.536794	663.407	0.0933371	0.156741	0.00179321	0.257362	194960	36.3797	Xingping City	Xianyang City	0.144801
2012	26	0.144511	17	12.9671	0.0023656	100518	1.92941	7366.41	623.574	0.101891	1635.82	0.230524	0.16014	0.000323636	0.232485	46481	13.311	Tongguan County	Weinan City	0.044111
2013	26	0.195065	17	14.7644	0.00195643	106600	2.27941	7356.22	736.692	0.265954	626.706	0.274687	0.155365	0.000938615	0.240459	43100	13.294	Tongguan County	Weinan City	0.054226
2014	26	0.298675	16	13.8899	0.00242622	118600	2.56875	747.324	781.369	0.264317	670	0.280573	0.156445	0.000932836	0.243054	41009	13.18	Tongguan County	Weinan City	0.074065
2015	26	0.327623	16	13.8385	0.00237583	142800	2.28437	747.662	694.867	0.265779	666.312	0.256314	0.181289	0.0010318	0.25924	45339	13.361	Tongguan County	Weinan City	0.09261
2016	26	0.405935	15.52	14.22	0.00232433	136600	2.37758	7456.42	701.521	0.267486	682.539	0.263834	0.187225	0.00094402	0.260761	44039	13.421	Tongguan County	Weinan City	0.115163
2017	26	0.548186	15.94	14.1541	0.00247154	138800	2.87139	5032.92	870.152	0.265804	668.758	0.240626	0.156469	0.00121951	0.262079	44056	13.456	Tongguan County	Weinan City	0.146315
2018	26	0.642025	15.42	13.8428	0.00225687	140068	2.61665	2609.42	767.086	0.264737	694.099	0.217309	0.216468	0.00121461	0.263233	44324	13.174	Tongguan County	Weinan City	0.167947
2019	26	0.700504	15.12	14.2729	0.00232468	140289	2.92395	185.917	840.251	0.264317	708.995	0.221278	0.217982	0.000746269	0.264252	42363	13.09	Tongguan County	Weinan City	0.16744
2020	26	0.769255	12.53	13.8574	0.00246732	153036	3.51836	1651.26	838.12	0.264563	854.749	0.225632	0.238951	0.000280112	0.265158	40402	13.2397	Tongguan County	Weinan City	0.181638
2021	26	0.859617	9.94	14.0437	0.00341779	156609	4.11278	133.259	900.631	0.264811	1076.46	0.230431	0.241364	0.000373832	0.265968	38441	13.3895	Tongguan County	Weinan City	0.196798
2012	27	0.213	35	10.8216	0.00251011	195794	3.16257	11711.5	971.817	0.712228	305.429	0.224377	0.124807	0.00252572	0.224752	119562	27.355	Huazhou District	Weinan City	0.064479
2013	27	0.331285	35	12.4829	0.0020457	144750	3.26943	11985.8	1004.65	0.317794	684.514	0.23935	0.135701	0.00125219	0.232256	112300	27.469	Huazhou District	Weinan City	0.085249
2014	27	0.457761	35	11.672	0.00259428	151161	3.37143	11996.2	1016.24	0.318272	683.486	0.2446	0.144148	0.00137948	0.235791	110102	27.583	Huazhou District	Weinan City	0.114519
2015	27	0.480406	34	11.7369	0.00245097	183378	3.17735	11971.2	948.464	0.318272	703.588	0.229371	0.159035	0.00146309	0.251117	117639	27.697	Huazhou District	Weinan City	0.107332
2016	27	0.415778	34.1	12.023	0.00225212	171000	2.58797	11999.7	774.539	0.317874	702.405	0.235959	0.203164	0.00137776	0.252087	114575	27.811	Huazhou District	Weinan City	0.100779
2017	27	0.431699	32.8	11.8347	0.00277294	207170	2.89573	13784.2	833.889	0.320631	723.963	0.236834	0.194219	0.00126337	0.252933	114008	27.925	Huazhou District	Weinan City	0.11826
2018	27	0.545834	31.81	11.5817	0.00239937	224559	2.37692	15568.7	663.825	0.322178	742.911	0.197279	0.30025	0.00131178	0.253676	136700	29.9955	Huazhou District	Weinan City	0.129855
2019	27	0.651426	31.38	11.7885	0.0026281	249044	3.16562	17353.3	872.145	0.322752	751.753	0.192971	0.253167	0.00131412	0.254334	139736	32.066	Huazhou District	Weinan City	0.135083
2020	27	0.728491	26.86	11.4389	0.00270418	256038	3.59584	17332.5	847.975	0.322506	878.928	0.188685	0.285719	0.00131311	0.254921	142772	31.8507	Huazhou District	Weinan City	0.140977
2021	27	0.814476	22.34	11.7562	0.00367704	249695	4.02606	1741.66	983.143	0.32226	1057.56	0.184578	0.26829	0.00131211	0.255448	145808	31.6354	Huazhou District	Weinan City	0.151447
2012	28	0.277111	26	12.0069	0.00258129	123223	2.61154	3852.55	827.785	0.267876	909.385	0.0668489	0.126759	0.000253764	0.228073	80480		Huayin City	Weinan City	0.08282
2013	28	0.330853	27	13.6998	0.00211491	126280	2.74296	3821.33	906.487	0.496445	472.519	0.0688348	0.131754	0.000470293	0.232017	78100		Huayin City	Weinan City	0.075189
2014	28	0.296263	26	12.8512	0.00261845	127778	3.13462	3842.69	958.996	0.497655	489.5	0.101173	0.133438	0.000550012	0.235727	75000		Huayin City	Weinan City	0.073616
2015	28	0.217879	26	12.8899	0.00245396	135994	3.93769	3835.86	984.333	0.498595	488.577	0.0933119	0.134261	0.000551051	0.250738	82176		Huayin City	Weinan City	0.039733
2016	28	0.188798	25.47	13.2099	0.00236818	152133	2.74912	384.595	857.038	0.50347	493.914	0.09804	0.161512	0.000556439	0.250134	78519		Huayin City	Weinan City	0.030561
2017	28	0.298978	26.34	13.0578	0.00269572	186688	3.22551	2111.85	1039.9	0.504392	476.727	0.0962327	0.137253	0.000637095	0.249612	80004		Huayin City	Weinan City	0.038734
2018	28	0.555973	25.18	12.8082	0.0023746	204380	3.62389	3839.11	1115.81	0.503991	499.087	0.0700691	0.164621	0.000716161	0.249156	109863		Huayin City	Weinan City	0.094928
2019	28	0.53104	24.78	13.1256	0.00259252	206192	2.85673	5566.36	866.46	0.50391	507.224	0.0710363	0.232897	0.000716047	0.248755	108339		Huayin City	Weinan City	0.094992
2020	28	0.604059	20.51	12.696	0.00273115	210948	3.53412	5566.94	887.206	0.503991	612.725	0.0726115	0.247863	0.000716161	0.248399	106815	24.9867	Huayin City	Weinan City	0.095895
2021	28	0.647085	16.24	12.9838	0.00366424	215549	4.2115	548.562	949.816	0.504071	773.707	0.0742324	0.250591	0.000716275	0.248081	105291		Huayin City	Weinan City	0.101796
2012	29	0.350384	98.45	13.7405	0.00168354	274551	2.66653	2583.43	2077.29	2.34085	127.608	0.158412	0.200768	0.00604951	0.228296	367542	88.187	Linwei District	Weinan City	0.088211
2013	29	0.342578	99.36	15.4935	0.00138068	365762	2.75532	2568.16	2166.08	0.423169	699.426	0.172625	0.215698	0.00107921	0.231382	337679	85.894	Linwei District	Weinan City	0.087872
2014	29	0.38152	96.29	14.6277	0.00192486	380995	3.15495	2579.38	2403.86	0.423005	722.006	0.20176	0.207495	0.0011651	0.234713	333084	83.581	Linwei District	Weinan City	0.096744
2015	29	0.458604	96.8	14.7578	0.00154628	432053	3.16952	2578.88	2427.76	0.445828	681.436	0.198081	0.212986	0.0014402	0.251655	349473	82.967	Linwei District	Weinan City	0.105882
2016	29	0.430834	96.2	15.2129	0.00141677	472469	3.45818	2594.2	2632.38	0.447728	682.775	0.19572	0.206532	0.00133977	0.252076	342034	81.819	Linwei District	Weinan City	0.101665
2017	29	0.494207	90.01	14.8181	0.00199069	483563	4.11643	3009.94	2931.89	0.462778	705.999	0.198165	0.190098	0.00158937	0.252437	342311	81.452	Linwei District	Weinan City	0.110286
2018	29	0.619266	91.21	14.7193	0.00153857	500162	4.68113	3425.69	3320.57	0.477475	675.266	0.187026	0.20171	0.00185092	0.252751	363987	83.892	Linwei District	Weinan City	0.139279
2019	29	0.558058	91.48	14.7143	0.00182138	516550	4.67436	3841.43	3383.63	0.49472	649.803	0.208314	0.198876	0.00153085	0.253025	297441	68.223	Linwei District	Weinan City	0.13451
2020	29	0.462287	92	14.3888	0.00193422	520183	4.83152	3865.18	3496.63	0.558368	572.478	0.305862	0.193344	0.00129111	0.253268	230895	83.764	Linwei District	Weinan City	0.109218
2021	29	0.366525	92.52	14.676	0.00270293	523816	4.98869	3828.55	3609.63	0.640812	496.022	0.482406	0.188159	0.000980563	0.253484	164349	99.305	Linwei District	Weinan City	0.09824
2012	30	0.133454	73	14.4988	0.00140024	213522	1.37788	498.846	566.329	0.601489	535.836	0.245024	0.481181	0.00227528	0.249584	290151	63.396	Dali County	Weinan City	0.027428
2013	30	0.179945	73	16.2368	0.00115514	250532	1.54658	3946.93	618.468	0.30796	1046.56	0.266577	0.495006	0.00132201	0.254847	278100	63.373	Dali County	Weinan City	0.039428
2014	30	0.216174	73	15.3243	0.00175706	262388	1.53932	3549.94	632.714	0.310783	1037.05	0.305295	0.519814	0.00136054	0.259787	270535	62.274	Dali County	Weinan City	0.050598
2015	30	0.248261	74	15.4398	0.00131651	300869	1.41527	3394.96	589.696	0.316319	1005.14	0.308633	0.570804	0.00147889	0.277212	283119	62.212	Dali County	Weinan City	0.065471
2016	30	0.260327	73.14	15.8802	0.00126945	302274	1.58532	343.386	652.872	0.317811	1012.18	0.334397	0.543372	0.00139131	0.27841	275547	61.316	Dali County	Weinan City	0.050473
2017	30	0.507282	70.44	15.6411	0.00163258	370000	2.33975	933.038	912.387	0.332822	1003.58	0.309313	0.400478	0.00161263	0.27944	278689	61.545	Dali County	Weinan City	0.067146
2018	30	0.486066	69.63	15.5314	0.00127961	407096	2.16254	1522.69	847.846	0.348194	970.429	0.280581	0.512893	0.00177591	0.280336	296788	63.52	Dali County	Weinan City	0.09675
2019	30	0.605441	68.91	15.7245	0.00139834	427539	2.44616	2112.34	949.105	0.351813	970.483	0.26081	0.509632	0.00173455	0.281122	306810	63.413	Dali County	Weinan City	0.124783
2020	30	0.72503	59.29	15.1236	0.00173946	446363	2.96196	295.163	988.232	0.366141	1083.81	0.2456	0.538875	0.00174295	0.281817	316832	63.5037	Dali County	Weinan City	0.150876
2021	30	0.83507	49.67	15.4567	0.00244131	420136	3.47776	245.265	1083.68	0.381685	1241.03	0.231323	0.536478	0.00175205	0.282436	326854	63.5944	Dali County	Weinan City	0.176968
2012	31	0.149893	79	13.8569	0.00110596	237162	1.6457	524.952	820.77	0.434866	747.152	0.172599	0.27991	0.00106734	0.228122	360256	85.172	Pucheng County	Weinan City	0.03727
2013	31	0.207498	80	15.6232	0.00105209	265041	1.77337	515.872	895.644	0.262306	1223.19	0.189475	0.289777	0.000674467	0.234922	330097	84.684	Pucheng County	Weinan City	0.047177
2014	31	0.254174	79	14.7094	0.00151607	304836	1.91925	4959.38	957.197	0.27038	1201.68	0.208175	0.290715	0.000990172	0.236854	325337	83.783	Pucheng County	Weinan City	0.05992
2015	31	0.344582	79	14.819	0.00121696	348416	1.96456	4819.22	979.545	0.274959	1181.67	0.189579	0.293715	0.00102837	0.251432	352164	83.641	Pucheng County	Weinan City	0.09384
2016	31	0.374086	79.21	15.3863	0.00104962	372132	2.59462	4776.4	1029.86	0.281963	1149.26	0.19383	0.293835	0.00103259	0.251865	342191	82.76	Pucheng County	Weinan City	0.094293
2017	31	0.450897	75.2	15.044	0.00153273	419300	2.41396	5473.08	1146.02	0.291373	1171.45	0.189123	0.272077	0.00113516	0.252239	345384	82.154	Pucheng County	Weinan City	0.105202
2018	31	0.586845	74.36	15.039	0.00102351	474398	2.56366	6169.76	1203.49	0.289801	1191.11	0.173307	0.309512	0.00115162	0.252565	377849	87.944	Pucheng County	Weinan City	0.116501
2019	31	0.700523	73.62	15.0585	0.00123606	496776	2.63728	6866.45	1225.74	0.288709	1207.63	0.160364	0.328651	0.00041617	0.252851	375765	87.79	Pucheng County	Weinan City	0.148858
2020	31	0.808117	66.26	14.4588	0.00158395	484979	3.71773	6838.18	1284.95	0.289324	1338.92	0.160131	0.337122	0.00031561	0.253105	373681	87.8648	Pucheng County	Weinan City	0.163041
2021	31	0.950908	58.9	14.8514	0.00220057	505140	4.79818	673.845	1426.75	0.289942	1503.02	0.159896	0.324883	0.00105052	0.253332	371597	87.9397	Pucheng County	Weinan City	0.193805
2012	32	0.0957969	80	13.2989	0.00122625	251983	1.25125	1317.23	805.958	0.317128	1104.24	0.590693	0.396659	0.000599962	0.229329	380052	81.826	Fuping County	Weinan City	0.021966
2013	32	0.152354	81	15.1208	0.00113639	281364	1.48296	13125.7	967.15	0.394646	876.383	0.652081	0.370537	0.000817051	0.234045	360006	81.366	Fuping County	Weinan City	0.037232
2014	32	0.250452	80	14.2203	0.0015515	308006	1.69388	13198	1090.19	0.394563	887.525	0.745724	0.352357	0.000859131	0.23678	355004	80.181	Fuping County	Weinan City	0.060473
2015	32	0.325659	79	14.2653	0.00126935	350247	1.65	13135.4	1048.67	0.39561	896.38	0.763058	0.379273	0.00103087	0.250943	370656	80.557	Fuping County	Weinan City	0.092505
2016	32	0.288704	80.01	14.9285	0.0010439	372205	1.71636	13135.5	1104.59	0.399235	877.028	0.835487	0.379055	0.000869305	0.250307	360202	79.968	Fuping County	Weinan City	0.063338
2017	32	0.3566	75.37	14.4732	0.00163843	458520	1.91694	15239.6	1163.29	0.41137	903.556	0.837783	0.368754	0.000910412	0.249759	360364	79.535	Fuping County	Weinan City	0.08484
2018	32	0.456187	75.03	14.435	0.00112007	484139	2.21244	17343.7	1336.53	0.420635	887.658	0.799403	0.402717	0.000990976	0.249281	377887	82.48	Fuping County	Weinan City	0.083058
2019	32	0.757722	74.27	14.3825	0.00140855	501325	2.47697	19447.8	1481.19	0.420661	896.688	0.151073	0.403277	0.00117122	0.248861	380305	82.331	Fuping County	Weinan City	0.204775
2020	32	0.865926	64.25	13.9404	0.00166177	502214	3.58949	19585.8	1554.57	0.422354	1032.37	0.150082	0.422254	0.00135685	0.248488	382723	82.3627	Fuping County	Weinan City	0.227641
2021	32	0.965232	54.23	14.3004	0.00216688	491400	4.70202	19417.8	1728.38	0.424061	1218.2	0.149104	0.413978	0.00154398	0.248156	385141	82.3944	Fuping County	Weinan City	0.249497
2012	58	0.0772456	9	10.0156	0.00182409	82938	2.87111	4899.48	168.779	0.281189	2126	0.129189	0.400712	0.000574893	0.236395	97446	16.186	Yijun County	Tongchuan City	0.015064
2013	58	0.138101	9	11.6586	0.00192959	96939	3.28222	5492.62	192.946	0.281218	2125.78	0.126037	0.380274	0.000627221	0.239924	99645	15.96	Yijun County	Tongchuan City	0.037863
2014	58	0.288853	9.29	10.8364	0.00203687	96980	3.51615	585.847	212.476	0.278742	2077.72	0.128629	0.342158	0.000621697	0.242824	97536	15.962	Yijun County	Tongchuan City	0.069228
2015	58	0.30771	9	11.0747	0.00164935	106145	3.67889	5978.19	216.123	0.276606	2161.22	0.120547	0.352434	0.000462701	0.255797	100782	17.624	Yijun County	Tongchuan City	0.089529
2016	58	0.382118	9.25	11.4027	0.00172421	116769	4.11351	6239.15	248.368	0.260155	2235.78	0.120087	0.315201	0.000483536	0.256682	104358	18.1	Yijun County	Tongchuan City	0.135152
2017	58	0.428364	9.21	11.3297	0.00173969	143011	3.31846	6951.42	199.497	0.244702	2387.3	0.119538	0.358335	0.000500296	0.257446	106418	18.414	Yijun County	Tongchuan City	0.128765
2018	58	0.553531	9.01	11.0262	0.00159689	153094	3.6833	7663.69	216.622	0.234057	2551.28	0.0718098	0.346942	0.000522034	0.258111	159268	26.195	Yijun County	Tongchuan City	0.171821
2019	58	0.653535	8.64	11.2498	0.00168953	163818	4.17642	8375.97	244.451	0.214038	2909.37	0.0625898	0.334686	0.000517166	0.258696	162215	26.622	Yijun County	Tongchuan City	0.173324
2020	58	0.755693	7.2	10.8759	0.00199251	162353	5.93611	8781.35	289.566	0.197173	3789.86	0.0536988	0.29569	0.000513065	0.259214	165162	26.6237	Yijun County	Tongchuan City	0.224193
2021	58	0.891086	5.76	11.2367	0.00282971	147495	7.69581	9126.89	864.228	0.182772	5110.59	0.174571	0.125847	0.000679417	0.259676	168109	26.6253	Yijun County	Tongchuan City	0.275062
2012	59	0.306968	32	10.7369	0.0018231	186149	4.39719	342.115	911.925	0.197002	1019.5	0.358266	0.127816	0.00067435	0.239252	84401	29.311	Yaozhou District	Tongchuan City	0.040183
2013	59	0.378272	33	12.4437	0.00174124	209960	4.57	3775.93	934.201	0.198763	979.848	0.361732	0.1287	0.000711304	0.241821	83819	29.796	Yaozhou District	Tongchuan City	0.051241
2014	59	0.51967	33.01	11.5949	0.00193695	234651	4.35597	4534.48	880.483	0.199881	974.069	0.354732	0.138336	0.000746408	0.242801	90347	29.921	Yaozhou District	Tongchuan City	0.099812
2015	59	0.501669	34	11.6261	0.00167529	273227	3.75	5224.49	794.888	0.200593	942.353	0.35741	0.162049	0.000405743	0.250053	87955	29.798	Yaozhou District	Tongchuan City	0.070054
2016	59	0.401553	33.9	12.0884	0.00153163	274421	4.36195	5966.4	910.1	0.202011	938.496	0.370283	0.145756	0.000440044	0.250659	89248	30.3	Yaozhou District	Tongchuan City	0.095662
2017	59	0.320655	23.75	11.8907	0.00187493	330810	5.61638	4260.21	831.602	0.203103	1332.38	0.36398	0.183685	0.00041082	0.251179	89983	30.457	Yaozhou District	Tongchuan City	0.105093
2018	59	0.307491	23.61	11.6822	0.00162863	355292	7.48316	2554.02	1090.46	0.202808	1342.23	0.347172	0.128854	0.000410224	0.25163	79246	25.643	Yaozhou District	Tongchuan City	0.110213
2019	59	0.430831	22.74	11.7122	0.00177649	371942	8.34458	847.838	1183.02	0.226183	1249.56	0.304833	0.108425	0.000457505	0.252026	73063	25.432	Yaozhou District	Tongchuan City	0.148678
2020	59	0.532226	18.4	11.4749	0.00195613	370943	11.7437	84.7253	1347.16	0.255648	1366.3	0.254665	0.0861272	0.000517104	0.252375	66880	25.221	Yaozhou District	Tongchuan City	0.187142
2021	59	0.637042	14.06	11.7776	0.00277591	330615	15.1428	8693.59	397.52	0.29394	1555.12	0.0302651	0.0278696	0.000274411	0.252686	60697	25.01	Yaozhou District	Tongchuan City	0.225607
2012	60	0.228409	20.63	11.2619	0.00151022	86992	3.54678	3955.72	4511.1	0.536307	188.609	0.163113	0.0272653	0.00179902	0.266394	11256	3.79	Wangyi District	Tongchuan City	0.03267
2013	60	0.324876	20.57	13.0013	0.00147748	93785	3.99417	4432.18	5065.35	0.529906	191.444	0.180122	0.0262597	0.00177755	0.26881	10182	3.803	Wangyi District	Tongchuan City	0.065866
2014	60	0.428263	20	12.1658	0.00180054	96420	4.194	4655.33	5171.39	0.52471	198.85	0.161031	0.0265415	0.00176012	0.270852	9967	3.823	Wangyi District	Tongchuan City	0.134314
2015	60	0.467087	19.8	12.1627	0.0015521	97423	4.43131	483.453	5409.37	0.523263	201.414	0.144805	0.0264178	0.00100301	0.253611	10559	3.853	Wangyi District	Tongchuan City	0.119001
2016	60	0.385836	19.62	12.738	0.00129516	119617	5.18563	54.4463	6179.41	0.391294	271.814	0.149096	0.0238701	0.000562535	0.253793	10235	3.861	Wangyi District	Tongchuan City	0.128389
2017	60	0.405987	19.54	12.4497	0.00177549	147863	4.46469	2310.12	5378.55	0.391735	272.62	0.144456	0.0263056	0.000563169	0.253949	10363	3.857	Wangyi District	Tongchuan City	0.176143
2018	60	0.437691	17.45	12.2764	0.00138462	151219	4.86745	4565.79	5229.35	0.39373	303.725	0.155323	0.0303902	0.000566038	0.254085	9477	3.45	Wangyi District	Tongchuan City	0.195781
2019	60	0.488339	16.73	12.3169	0.0015917	156979	5.54393	6821.46	5718.25	0.394848	315.9	0.170175	0.030841	0.000567644	0.254204	8503	3.361	Wangyi District	Tongchuan City	0.214367
2020	60	0.554499	13.5	11.9275	0.0018531	163192	7.45778	7189.85	6207.15	0.395972	390.37	0.18887	0.0312207	0.00056926	0.254309	7529	3.272	Wangyi District	Tongchuan City	0.232953
2021	60	0.612975	10.27	12.2861	0.00254214	169405	9.37162	7512.13	4316.89	0.397102	511.685	1.30984	0.107002	0.00171265	0.254403	6555	3.183	Wangyi District	Tongchuan City	0.25154
2012	61	0.293384	22.62	10.8543	0.00165539	96232	3.63665	1546.47	1306.67	0.357107	394.518	0.169545	0.102165	0.00123263	0.243472	38450	9.991	Yintai District	Tongchuan City	0.074844
2013	61	0.528288	22.47	12.5531	0.00168319	96498	3.46862	172.616	1238.05	0.343816	412.506	0.193143	0.116559	0.00118675	0.248887	37361	10.205	Yintai District	Tongchuan City	0.149981
2014	61	0.530146	21.76	11.7209	0.00193305	101861	3.34467	1134.69	1048.86	0.346093	423.162	0.232329	0.139461	0.00130321	0.253217	36091	10.351	Yintai District	Tongchuan City	0.155885
2015	61	0.480005	21.2	11.7849	0.00166014	113027	2.98396	1139.82	1004.86	0.34553	435.047	0.220252	0.152831	0.000650548	0.256841	35691	10.395	Yintai District	Tongchuan City	0.093889
2016	61	0.274344	20.78	12.2997	0.00150163	142041	3.96246	119.434	1022.02	0.341458	449.134	0.224626	0.153715	0.00064288	0.259401	36198	10.407	Yintai District	Tongchuan City	0.108129
2017	61	0.297268	20.95	12.0788	0.00184893	151612	3.66348	592.749	1219.14	0.333699	455.847	0.215568	0.0920834	0.000732984	0.261608	36086	10.595	Yintai District	Tongchuan City	0.128515
2018	61	0.37995	18.95	11.8704	0.00149833	169218	3.25858	1066.06	980.875	0.337766	497.889	0.20199	0.124296	0.000741918	0.263528	39804	11.192	Yintai District	Tongchuan City	0.133646
2019	61	0.326104	18.12	11.9765	0.0016827	177557	3.48565	1539.38	1003.27	0.337016	521.854	0.215018	0.131146	0.000740271	0.265216	38606	10.574	Yintai District	Tongchuan City	0.099105
2020	61	0.357057	13.4	11.5525	0.0019837	191025	4.81866	164.341	1025.67	0.336269	707.239	0.228882	0.137697	0.00073863	0.26671	37408	9.956	Yintai District	Tongchuan City	0.120767
2021	61	0.373414	8.68	11.9367	0.00269323	204493	6.15166	1657.65	881.596	0.335526	1094.24	1.32074	0.565274	0.00368499	0.268042	36210	9.338	Yintai District	Tongchuan City	0.1087
2012	62	0.181433	30	11.9692	0.00131832	140294	2.43333	546.555	637.604	0.300956	952.567	0.4354	0.587953	0.00132974	0.229789	117880	28.238	Baishui County	Weinan City	0.049629
2013	62	0.239197	28	13.7219	0.00152581	152612	2.36786	5472.27	690.625	0.299625	1025.14	0.485216	0.600658	0.00139353	0.237203	110759	28.059	Baishui County	Weinan City	0.059727
2014	62	0.339837	29	12.8349	0.00178772	167935	2.12269	5648.24	641.042	0.299479	990.276	0.552867	0.673887	0.00142768	0.241408	105208	27.516	Baishui County	Weinan City	0.064146
2015	62	0.370815	29	12.982	0.0013644	188745	2.17138	5629.96	655.938	0.299302	990.862	0.551947	0.694234	0.00139203	0.257902	111623	27.874	Baishui County	Weinan City	0.07284
2016	62	0.39973	28.66	13.3864	0.00137457	207690	2.52237	572.515	752.396	0.3287	912.945	0.587742	0.623337	0.00122301	0.259943	109070	27.999	Baishui County	Weinan City	0.069144
2017	62	0.456683	28.4	13.2498	0.00162705	230500	2.72878	671.632	807.264	0.325934	929.12	0.630243	0.694924	0.00125062	0.261703	109004	28.224	Baishui County	Weinan City	0.062864
2018	62	0.576348	27.96	13.2251	0.00127771	252091	3.23938	770.749	864.271	0.329367	933.906	0.69055	0.686497	0.00118719	0.263237	102598	24.728	Baishui County	Weinan City	0.072644
2019	62	0.644388	27.59	13.282	0.00140221	258462	3.49879	869.866	860.37	0.330977	941.827	0.682903	0.739189	0.00111603	0.264586	102180	24.722	Baishui County	Weinan City	0.068033
2020	62	0.722174	22.38	12.8281	0.00170464	252678	4.18623	871.766	957.906	0.332602	1155.41	0.675193	0.708456	0.00104416	0.265782	101762	24.9527	Baishui County	Weinan City	0.074418
2021	62	0.824416	17.17	13.1648	0.00246941	219978	4.87367	8657.47	788.037	0.334244	1498.6	0.314286	0.403724	0.00112705	0.266849	101344	25.1833	Baishui County	Weinan City	0.077774
2012	63	0.0750283	40	12.2893	0.00123498	166968	2.7525	6231.37	740.5	0.456979	1137.6	0.185759	0.413633	0.000703235	0.211943	177655	43.71	Chengcheng County	Weinan City	0.016208
2013	63	0.117075	41	14.1385	0.00132028	183596	2.82439	5912.13	760.839	0.449055	1129.44	0.191485	0.432316	0.000755825	0.215531	175100	43.574	Chengcheng County	Weinan City	0.03079
2014	63	0.191838	40	13.162	0.00172376	200369	2.565	5995.82	733.809	0.443141	1173.12	0.21186	0.462619	0.000788492	0.219336	167304	43.397	Chengcheng County	Weinan City	0.046742
2015	63	0.206607	39	13.2113	0.00140032	236656	2.26667	5852.44	705.085	0.445705	1196.28	0.197731	0.509184	0.000857357	0.233605	178561	43.396	Chengcheng County	Weinan City	0.053844
2016	63	0.259358	39.34	13.5942	0.00136499	239836	2.17819	5781.32	764.407	0.443528	1191.76	0.203534	0.481382	0.000746523	0.234348	175553	43.337	Chengcheng County	Weinan City	0.061217
2017	63	0.32434	39.32	13.5168	0.00158637	289858	2.23413	6786.97	783.638	0.440624	1200.23	0.144152	0.578636	0.000805204	0.234992	172478	42.938	Chengcheng County	Weinan City	0.075675
2018	63	0.552691	37.91	13.514	0.00124387	309306	2.59885	7792.62	878.621	0.432073	1269.51	0.130958	0.573236	0.00209861	0.235556	181348	41.121	Chengcheng County	Weinan City	0.145528
2019	63	0.696157	37.31	13.6645	0.00132811	318836	2.77518	8798.27	923.657	0.433234	1286.46	0.1405	0.599654	0.00341681	0.236054	168719	41.061	Chengcheng County	Weinan City	0.195104
2020	63	0.830822	30.41	13.0523	0.00161184	305696	3.73972	896.551	1013.59	0.434402	1574.12	0.151586	0.59546	0.00474211	0.236496	156090	41.1613	Chengcheng County	Weinan City	0.232518
2021	63	0.966233	23.51	13.3914	0.00256993	295568	4.70426	8982.97	2078.61	0.435575	2030.63	0.121803	0.0993886	0.00058651	0.236893	143461	41.2615	Chengcheng County	Weinan City	0.273752
2012	64	0.217657	40	11.3636	0.0016034	211518	7.515	6573.52	1740.04	0.0411696	672.05	0.210729	0.0915802	0.00104159	0.263696	83268	23.47	Hancheng City	Weinan City	0.050583
2013	64	0.275818	40	13.2141	0.00177254	280945	7.57525	655.188	1869.28	0.0406286	681	0.226959	0.0913739	0.00110132	0.271505	77600	23.36	Hancheng City	Weinan City	0.063163
2014	64	0.344091	40	12.3418	0.00208733	307921	7.78225	853.858	1920.36	0.0437353	632.625	0.242368	0.0925128	0.00122505	0.274891	72790	22.95	Hancheng City	Weinan City	0.086354
2015	64	0.426651	40	12.5528	0.00158484	344626	8.95	8346.23	1976.43	0.0473565	584.25	0.249724	0.0954367	0.00119812	0.293556	72576	21.37	Hancheng City	Weinan City	0.108074
2016	64	0.459699	40.15	12.85	0.00184455	386603	8.69244	8373.16	2152.99	0.0447902	615.417	0.262918	0.0904817	0.00105225	0.29395	68721	21.29	Hancheng City	Weinan City	0.103455
2017	64	0.498068	40.06	12.8822	0.00161613	483984	9.21136	9840.22	2276.34	0.0450381	613.405	0.284055	0.114067	0.00101738	0.294289	65086	19.94	Hancheng City	Weinan City	0.103388
2018	64	0.595646	39.94	12.8185	0.0014472	552655	8.89669	11307.3	2170.61	0.0453426	611.117	0.371042	0.12979	0.000983284	0.294582	48539	14.29	Hancheng City	Weinan City	0.09423
2019	64	0.661147	39.46	13.1306	0.00150249	553084	8.57679	12774.4	2087.85	0.045943	610.466	0.365766	0.145506	0.000954793	0.294838	49250	14.25	Hancheng City	Weinan City	0.100037
2020	64	0.732481	38.31	12.425	0.00192676	540631	9.77632	1295.51	2310.42	0.0465596	620.465	0.360641	0.141041	0.000925536	0.295064	49961	14.4555	Hancheng City	Weinan City	0.1037
2021	64	0.793712	37.16	12.748	0.0029174	475529	10.9759	12834.7	535.719	0.047193	631.082	0.660088	0.445583	0.000426421	0.295265	50672	14.6609	Hancheng City	Weinan City	0.107517
2012	65	0.259864	45	12.8533	0.0011885	169800	13355.6	32375.7	352.749	0.929961	617.022	0.121378	0.457486	0.000972412	0.221456	220180	50.755	Heyang County	Weinan City	0.069146
2013	65	0.231075	46	14.7801	0.00117666	192000	1.475	32524.8	418.232	0.442274	1269.2	0.121488	0.457444	0.000513848	0.226787	207000	50.709	Heyang County	Weinan City	0.053998
2014	65	0.248725	46	13.8177	0.001686	211500	1.55196	33437.7	472.164	0.440426	1274.52	0.126203	0.465569	0.000528758	0.229636	197372	50.459	Heyang County	Weinan City	0.04683
2015	65	0.345809	45	13.7641	0.00148411	233900	1.67356	33304.7	496.799	0.442183	1297.67	0.120226	0.457724	0.000547992	0.243542	206254	49.596	Heyang County	Weinan City	0.08022
2016	65	0.371963	45.29	14.216	0.00134537	253000	1.73261	33260	524.078	0.441126	1292.45	0.121935	0.462948	0.000546681	0.245844	203091	50.098	Heyang County	Weinan City	0.090757
2017	65	0.40019	44.41	14.1655	0.00153285	285100	2.08174	37812.9	546.068	0.442722	1313.31	0.121031	0.404931	0.000514368	0.247839	204038	50.164	Heyang County	Weinan City	0.096069
2018	65	0.555344	44.32	14.1319	0.00120108	327600	2.19269	43377.7	643.354	0.4421	1317.82	0.112245	0.469926	0.00056501	0.249586	219724	50.604	Heyang County	Weinan City	0.128158
2019	65	0.587327	43.91	14.3602	0.00128657	353600	2.39071	50013.3	676.27	0.440787	1334.09	0.106841	0.485157	0.000580403	0.251127	229790	50.504	Heyang County	Weinan City	0.123221
2020	65	0.685775	36.07	13.76	0.00154115	346800	3.13192	50393	730.523	0.44213	1619.13	0.101995	0.497418	0.000599295	0.252497	239856	50.8029	Heyang County	Weinan City	0.142761
2021	65	0.747579	35.46	14.0212	0.00267554	345689	3.24679	49983.3	786.139	0.443482	1641.96	0.0975384	0.495978	0.000618302	0.253723	249922	51.1018	Heyang County	Weinan City	0.158507
2012	66	0.241406	29	9.51527	0.00196977	132368	3.5269	1372.12	564.771	0.160455	2001.59	0.22304	0.424964	0.000189505	0.237378	126735	20.973	Xunyi County	Xianyang City	0.064949
2013	66	0.301998	30	11.1604	0.00173351	142504	3.86733	144.948	640.641	0.335427	925.567	0.28119	0.419535	0.000432168	0.24513	118923	20.602	Xunyi County	Xianyang City	0.081745
2014	66	0.274492	29	10.2576	0.00193832	145102	3.61834	119.118	579.365	0.336505	954.414	0.312141	0.488208	0.000505817	0.249957	108028	20.216	Xunyi County	Xianyang City	0.052321
2015	66	0.29804	29	10.4501	0.00162516	153941	3.6769	1917.29	601.071	0.335608	956.966	0.285142	0.493765	0.000360334	0.256524	112523	20.14	Xunyi County	Xianyang City	0.073498
2016	66	0.366631	29.56	10.7616	0.00165151	188731	4.12788	1814.48	687.824	0.334836	941.001	0.276626	0.444389	0.000359505	0.258177	110004	20.704	Xunyi County	Xianyang City	0.117892
2017	66	0.469663	26.71	10.6196	0.00179519	203568	3.61646	5432.16	533.322	0.335198	1040.28	0.283879	0.497097	0.000359893	0.259593	105721	20.167	Xunyi County	Xianyang City	0.167412
2018	66	0.398316	26.79	10.3687	0.00178456	238014	3.29925	9049.85	488.056	0.335198	1037.18	0.273218	0.568725	0.000467862	0.260821	105319	19.673	Xunyi County	Xianyang City	0.158826
2019	66	0.463517	26.87	10.4433	0.00175902	243141	3.32595	12667.5	492.601	0.335198	1034.09	0.222095	0.588767	0.00057583	0.261894	123992	20.06	Xunyi County	Xianyang City	0.16615
2020	66	0.59244	21.19	10.3257	0.00195017	260770	4.99956	12319.4	584.925	0.335198	1311.28	0.184355	0.517133	0.000683798	0.262841	142665	20.447	Xunyi County	Xianyang City	0.171451
2021	66	0.76619	15.51	10.6569	0.00277918	252963	6.67317	11389.7	246.383	0.335198	1791.49	0.201193	0.468261	0.000431872	0.263683	161338	20.834	Xunyi County	Xianyang City	0.176752
2012	67	0.141698	19	10.9223	0.00168342	90846	2.76737	7813.4	927.337	0.642101	582	0.545536	0.443925	0.00117562	0.231191	62665	12.066	Changwu County	Xianyang City	0.03622
2013	67	0.122421	19	12.6855	0.0015745	110669	3.19	7854.2	1068.96	0.632661	590.684	0.53273	0.48213	0.00124744	0.236458	58921	12.144	Changwu County	Xianyang City	0.030303
2014	67	0.339062	19	11.8067	0.00184167	110419	3.62263	8929.76	1213.93	0.608637	614	0.590304	0.446698	0.00128579	0.240041	55175	12.016	Changwu County	Xianyang City	0.123942
2015	67	0.350744	19	12.1268	0.00138392	124968	3.84215	8787.73	1287.48	0.606453	616.211	0.567041	0.438	0.00119576	0.246459	58666	11.983	Changwu County	Xianyang City	0.126589
2016	67	0.329439	18.78	12.405	0.00150333	147557	5.17561	85.8995	1688.73	0.603003	626.997	0.611282	0.368724	0.00110403	0.247899	54793	12.215	Changwu County	Xianyang City	0.090422
2017	67	0.437382	17.16	12.0487	0.00164579	171679	5.85431	552.481	1768.66	0.600148	689.452	0.60541	0.306972	0.00101428	0.249134	56266	12.279	Changwu County	Xianyang City	0.103196
2018	67	0.474712	17.24	11.9236	0.00170597	196148	5.93684	1019.06	1800.09	0.596218	690.777	0.60549	0.335901	0.00142749	0.250204	55669	12.081	Changwu County	Xianyang City	0.100866
2019	67	0.584068	17.68	11.904	0.00160329	212613	5.68317	1485.64	1745.6	0.590663	679.921	0.614395	0.381745	0.00183013	0.25114	54281	12.124	Changwu County	Xianyang City	0.134038
2020	67	0.717936	14.84	11.6421	0.0021687	207342	7.97346	1456.53	2083.1	0.58521	817.588	0.623769	0.349525	0.00222534	0.251967	52893	12.167	Changwu County	Xianyang City	0.168074
2021	67	0.876895	12	11.9108	0.00249136	225500	10.2637	9928.47	613.908	0.579857	1020.42	0.470246	0.560556	0.00114332	0.252702	51505	12.21	Changwu County	Xianyang City	0.217182
2012	68	0.281061	21	11.2401	0.00166461	101489	1.96895	1345.35	464.904	0.709425	916.952	0.350823	0.607065	0.000882842	0.231164	84735	18.623	Yongshou County	Xianyang City	0.099794
2013	68	0.226114	21	12.9697	0.00162056	115710	2.13476	138.38	504.274	0.698649	931.095	0.375683	0.609242	0.000920575	0.237203	82000	19.134	Yongshou County	Xianyang City	0.054557
2014	68	0.282213	21	12.1384	0.00184919	117655	2.38952	13496.9	562.43	0.669576	971.524	0.378323	0.585022	0.000980296	0.240308	81018	18.939	Yongshou County	Xianyang City	0.104237
2015	68	0.34056	21	12.2486	0.00154484	123377	2.79952	13354.7	659.28	0.669477	971.667	0.344074	0.533489	0.000833129	0.246669	89068	18.915	Yongshou County	Xianyang City	0.103659
2016	68	0.278353	20.81	12.7418	0.00144884	137251	3.51321	12937.6	822.385	0.667286	983.758	0.349729	0.450308	0.000976944	0.248282	87605	19.271	Yongshou County	Xianyang City	0.065195
2017	68	0.366261	18.85	12.4203	0.00183446	164400	4.53187	13790.3	960.919	0.665142	1089.55	0.349416	0.41644	0.00102249	0.249665	86696	19.197	Yongshou County	Xianyang City	0.067377
2018	68	0.454275	18.93	12.0928	0.00181498	188681	4.45626	14642.9	948.898	0.664883	1085.37	0.35819	0.448452	0.00111944	0.250862	84687	19.136	Yongshou County	Xianyang City	0.091648
2019	68	0.519043	19.01	12.0722	0.00175702	196864	4.4515	15495.6	951.89	0.664592	1081.27	0.376665	0.473695	0.00121625	0.25191	80642	19.19	Yongshou County	Xianyang City	0.107936
2020	68	0.647042	16.02	12.0137	0.00207931	201763	5.94745	15393	1064.05	0.664301	1283.65	0.397091	0.447607	0.00131297	0.252835	76597	19.244	Yongshou County	Xianyang City	0.124224
2021	68	0.735637	13.03	12.253	0.00264274	190750	7.44339	14556.5	1531.83	0.66401	1578.89	0.392463	0.1853	0.000486074	0.253657	72552	19.298	Yongshou County	Xianyang City	0.140511
2012	69	0.0729027	36	10.6342	0.00169849	209539	4.59528	26421.1	1398.39	0.333448	848.639	0.172538	0.16746	0.000360054	0.237051	129983	27.89	Binzhou City	Xianyang City	0.035893
2013	69	0.204666	36	12.3819	0.00149969	231363	5.16917	26485.6	1575.7	0.326837	865.806	0.174374	0.160046	0.000417081	0.244158	118286	27.678	Binzhou City	Xianyang City	0.052254
2014	69	0.388837	37	11.4762	0.00184338	210943	4.59486	27816.3	1434.68	0.325646	845.486	0.186559	0.181136	0.000447527	0.24811	115331	27.466	Binzhou City	Xianyang City	0.118768
2015	69	0.430446	37	11.7621	0.00139646	224096	5.13243	26671.7	1594.76	0.324123	849.459	0.171658	0.168483	0.000445434	0.25424	125622	27.254	Binzhou City	Xianyang City	0.126089
2016	69	0.466903	36.56	12.0738	0.0014614	244665	5.843	26859.6	1804.22	0.322553	863.868	0.162618	0.158481	0.000474939	0.25515	123049	27.042	Binzhou City	Xianyang City	0.139549
2017	69	0.595116	32.99	11.7619	0.0016881	233126	6.58126	31759	1833.73	0.320805	962.564	0.158787	0.150411	0.000503858	0.255935	121458	26.83	Binzhou City	Xianyang City	0.189016
2018	69	0.64108	33.27	11.577	0.00168057	264896	6.94629	36658.4	1951.88	0.319047	959.723	0.16594	0.153496	0.000657689	0.256618	116741	26.618	Binzhou City	Xianyang City	0.211137
2019	69	0.747735	32.16	11.5463	0.00164062	277739	6.72864	41557.8	1825.53	0.317863	996.549	0.174071	0.177154	0.000811258	0.257218	111782	26.406	Binzhou City	Xianyang City	0.226293
2020	69	0.835244	30.02	11.301	0.00207838	259746	8.99928	43685.1	2281.74	0.316687	1071.55	0.182957	0.152162	0.000963691	0.257748	106823	26.461	Binzhou City	Xianyang City	0.241449
2021	69	0.962513	27.88	11.6005	0.00256294	281904	11.2699	4367.68	360.389	0.315519	1158.07	0.321222	0.883424	0.000588472	0.258222	101864	26.516	Binzhou City	Xianyang City	0.256605
2012	70	0.120248	20	10.9852	0.00160321	107593	2.5125	21265.2	523.438	0.300686	1271.6	0.227815	0.830784	0.000904372	0.245728	124294	17.24	Chunhua County	Xianyang City	0.038643
2013	70	0.192426	20	12.6978	0.00158323	112882	2.677	21358.7	545.214	0.293733	1301.7	0.266202	0.852936	0.000921871	0.252037	115544	23.553	Chunhua County	Xianyang City	0.047707
2014	70	0.255989	19	11.8668	0.00176009	115757	3.2	2263.88	584.318	0.279804	1438.42	0.278909	0.801844	0.000914746	0.255279	110000	23.24	Chunhua County	Xianyang City	0.071061
2015	70	0.335193	20	11.9546	0.00144849	136112	3.2455	2256.58	660.326	0.265947	1437.7	0.243809	0.739619	0.000521667	0.261899	118043	23.148	Chunhua County	Xianyang City	0.100318
2016	70	0.431606	19.7	12.4285	0.00137114	161053	3.79594	2276.95	760.732	0.265929	1459.7	0.214867	0.677493	0.00052163	0.254996	115709	23.679	Chunhua County	Xianyang City	0.162098
2017	70	0.563582	19.7	12.0952	0.00185922	175098	3.86193	10623.5	773.957	0.265873	1460	0.198377	0.597787	0.00055629	0.24942	113476	23.637	Chunhua County	Xianyang City	0.224376
2018	70	0.620478	19.78	11.9338	0.00156397	203973	3.91911	18970	788.606	0.266727	1449.44	0.190225	0.628502	0.000383676	0.244822	112614	23.468	Chunhua County	Xianyang City	0.235613
2019	70	0.674499	19.81	11.8576	0.00170797	210000	4.14182	27316.5	834.354	0.266466	1448.66	0.186663	0.633569	0.000209074	0.240966	108929	23.657	Chunhua County	Xianyang City	0.284915
2020	70	0.789772	14.18	11.7322	0.00183579	210454	6.39915	27629.5	923.093	0.266207	2025.81	0.182851	0.60839	3.48117e-05	0.237685	105244	23.846	Chunhua County	Xianyang City	0.339653
2021	70	0.889222	8.55	11.9707	0.00254128	224792	8.65649	26613	418.616	0.265947	3363.04	0.228409	0.232007	0.000208667	0.23486	101559	24.035	Chunhua County	Xianyang City	0.365421
2012	71	0.122421	9	10.3468	0.00187202	72355	5.62111	12455.7	296.89	0.176778	3281.11	0.372985	0.202825	0.000237047	0.239905	63284	20.897	Linyou County	Baoji City	0.019757
2013	71	0.179518	9	12.0653	0.0017415	76031	6.19444	11384	327.171	0.172559	3361.33	0.246099	0.192935	0.000264445	0.242513	60236	20.999	Linyou County	Baoji City	0.044425
2014	71	0.378219	9	11.2171	0.00198306	90789	7.16444	11444.4	378.404	0.173748	3338.33	0.229804	0.172788	0.000266267	0.244485	66326	21.37	Linyou County	Baoji City	0.092134
2015	71	0.389782	9	11.4315	0.00168664	95341	7.91111	11572.9	417.312	0.173679	3339.67	0.203105	0.16543	0.000166351	0.230868	72780	22.281	Linyou County	Baoji City	0.074046
2016	71	0.403423	8.74	11.7864	0.00162613	101202	12.1899	11772.9	625.235	0.173679	3439.02	0.188205	0.113567	0.000166351	0.232188	78558	22.708	Linyou County	Baoji City	0.107207
2017	71	0.498707	9.23	11.4866	0.00187861	117500	11.8873	13165.1	643.897	0.176682	3201.08	0.200577	0.0993511	0.000169228	0.233328	73787	22.485	Linyou County	Baoji City	0.129222
2018	71	0.472286	9.21	11.2249	0.00188309	133800	15.2672	14557.2	825.176	0.177174	3199.13	0.200903	0.0933397	0.000407277	0.234323	73523	22.065	Linyou County	Baoji City	0.104726
2019	71	0.640289	9.23	11.1692	0.0018887	145246	13.896	15949.3	752.7	0.178745	3164.14	0.198188	0.119665	0.000650574	0.235198	74384	22.457	Linyou County	Baoji City	0.160937
2020	71	0.777451	7.33	10.9647	0.00234916	150800	24.422	16112.4	1050.47	0.180345	3948.98	0.195535	0.098167	0.000898224	0.235974	75245	22.849	Linyou County	Baoji City	0.198952
2021	71	0.954616	5.43	11.2773	0.00273176	151300	34.948	16226.6	650.235	0.181973	5283.06	0.0675899	0.088537	0.00034859	0.236668	76106	23.241	Linyou County	Baoji City	0.231813
2012	72	0.250242	10	8.54839	0.00307841	91572	13.21	9684.27	408.566	0.309534	971.4	0.175071	0.0853805	0.00113239	0.247494	28714	6.336	Feng County	Baoji City	0.053175
2013	72	0.27312	10	10.0599	0.00322078	80489	14.561	8973.94	456.887	0.311749	964.5	0.232917	0.0814195	0.00114049	0.254845	22025	5.912	Feng County	Baoji City	0.066363
2014	72	0.371184	10	9.254	0.00278024	82366	14.845	989.788	465.799	0.312429	962.4	0.2298	0.0829808	0.00124688	0.259639	22389	5.982	Feng County	Baoji City	0.078902
2015	72	0.391854	10	9.70492	0.00286693	119451	17.74	914.243	535.739	0.312202	963.1	0.229555	0.0754153	0.000622988	0.251697	23637	6.106	Feng County	Baoji City	0.097423
2016	72	0.40985	9.54	9.69318	0.00248141	117177	18.8785	9238.39	565.108	0.312559	1008.39	0.233571	0.0737679	0.000623701	0.25257	23282	6.118	Feng County	Baoji City	0.085989
2017	72	0.50445	10.75	9.59008	0.00295506	124808	12.4447	10407.4	419.768	0.3137	891.628	0.229696	0.0955965	0.000625978	0.253328	23000	5.995	Feng County	Baoji City	0.104636
2018	72	0.515253	10.73	9.27021	0.00301292	131660	7.23764	11576.4	243.677	0.318552	879.683	0.266241	0.192855	0.000529717	0.253992	23828	6.162	Feng County	Baoji City	0.125488
2019	72	0.526101	10.71	9.33431	0.00335528	140269	7.45542	12745.4	250.541	0.320967	874.697	0.309522	0.214976	0.000426985	0.254578	23924	6.072	Feng County	Baoji City	0.120588
2020	72	0.647045	7.92	9.02772	0.00380315	170742	11.5525	12878.4	287.09	0.323418	1173.86	0.352456	0.211524	0.000322685	0.2551	24020	5.982	Feng County	Baoji City	0.147089
2021	72	0.718989	5.13	9.47171	0.00452028	171647	15.6496	12972.5	43.2695	0.325907	1798.44	0.18751	0.551204	0.000650336	0.255567	24116	5.892	Feng County	Baoji City	0.157261
2012	73	0.118566	5	7.02104	0.00372958	59973	3.166	117.357	58.6731	0.0818916	1302.6	0.585186	0.539267	0.00107477	0.241921	7331	2.148	Taibai County	Baoji City	0.016057
2013	73	0.219222	5	8.46079	0.00340219	68601	3.422	1789.58	63.4173	0.0822832	1296.4	0.688226	0.533068	0.00107991	0.244874	6370	2.219	Taibai County	Baoji City	0.055881
2014	73	0.246505	5	7.58222	0.00373426	73927	3.92	1899.88	72.6464	0.0825635	1292	0.655738	0.505536	0.00123839	0.249205	6405	2.164	Taibai County	Baoji City	0.062943
2015	73	0.431024	5	8.10761	0.00346332	93310	4.182	1126.59	77.5019	0.0823722	1295	0.554004	0.492353	0.000926641	0.236846	7592	2.188	Taibai County	Baoji City	0.091115
2016	73	0.385048	4.9	8.03976	0.00318742	97379	4.58163	11197.6	75.6402	0.0820806	1326.12	0.585637	0.504659	0.000923361	0.237854	7380	2.111	Taibai County	Baoji City	0.107802
2017	73	0.422394	5.2	7.98012	0.00343823	96029	5.32696	12856	102.653	0.0824359	1244.23	0.598668	0.413685	0.000927357	0.238723	7059	2.051	Taibai County	Baoji City	0.116038
2018	73	0.526267	5.18	7.55208	0.00418314	113563	5.84149	14514.5	112.153	0.0823722	1250	0.626395	0.42174	0.000926641	0.239479	6721	1.973	Taibai County	Baoji City	0.127579
2019	73	0.619142	5.15	7.66931	0.00391411	103118	7.27524	16172.9	138.871	0.0824996	1255.34	0.620782	0.375407	0.000928074	0.240143	6756	1.923	Taibai County	Baoji City	0.152338
2020	73	0.763127	3.96	7.50382	0.00381629	113747	11.5179	16224.7	168.818	0.0826274	1630.05	0.615226	0.337444	0.000929512	0.24073	6791	1.92534	Taibai County	Baoji City	0.168703
2021	73	0.846948	2.77	8.01397	0.00511705	115186	15.7606	16225.4	223.239	0.0827556	2326.71	0.509815	0.218092	0.00356866	0.241254	6826	1.92769	Taibai County	Baoji City	0.184776

## Sheet:  Change Sample Interval
Year	id	Y	Y2	Total population at the end of the year(10,000 people)	Average annual temperature（℃）	Average annual precipitation	Local budget expenditures(10,000 yuan)	Population productivity (million yuan/person)	Effective irrigated area(ha)	Regional economic density(million yuan/square kilometer)	Protection Rate of Permanent Basic Farmland	Cultivated land area per capital (ha/million people)	Fertilizer Application Intensity	Proportion of Gross Output Value of Farming, Forestry, Animal Husbandry and Fishery	Total Mechanical Power per Unit Cultivated Land	Proportion of Per Capita Disposable Income of Rural Residents	Total Grain Output	Sown Area of Grain Crops	xian	County/District
2013	1	0.320235	0.053844	53.21	14.6867	0.00159294	190742	5.56451	24548.8	8290.6	0.00745295	184.928	0.371545	0.103893	0.00182215	0.322405	56370	13.2134	Baqiao District	Xi’an City
2014	1	0.350186	0.097943	53.6	13.8822	0.00214772	220305	5.47215	24385.5	9038.52	0.00793605	172.407	0.394736	0.102533	0.00171735	0.325769	52853	12.0734	Baqiao District	Xi’an City
2015	1	0.406207	0.118376	53.89	13.9703	0.00190118	295407	6.16589	24675.2	10239.8	0.00842083	161.607	0.385623	0.0926749	0.00183718	0.355582	54071	11.5801	Baqiao District	Xi’an City
2016	1	0.441865	0.103446	54.68	14.4933	0.0016231	272233	6.319	2454.65	10162.7	0.0139903	95.8669	0.361424	0.0991755	0.00276803	0.357092	52567	10.6867	Baqiao District	Xi’an City
2017	1	0.558448	0.132275	64.06	14.1027	0.00199597	293695	6.6867	14740.5	13200.3	0.0151523	75.5542	0.15075	0.0851446	0.00289256	0.3584	49645	10.339	Baqiao District	Xi’an City
2018	1	0.44855	0.110339	67.73	13.8741	0.00177212	330784	7.98479	27026.4	14816	0.0165248	65.5249	0.257327	0.0647444	0.00292925	0.359545	27673	5.42669	Baqiao District	Xi’an City
2019	1	0.497795	0.12743	70.39	13.8814	0.00219054	355428	6.94979	39312.3	15075.2	0.0197408	52.7774	0.0952844	0.0668998	0.00323015	0.360555	24684	4.71336	Baqiao District	Xi’an City
2020	1	0.533937	0.136869	102.1	13.4952	0.00222255	371532	5.39187	4265.59	16704.5	0.024511	29.3046	0.125789	0.0631908	0.00392714	0.361453	21695	4.52002	Baqiao District	Xi’an City
2013	2	0.321503	0.061154	26.01	16.6441	0.00103206	166351	6.49596	5542.88	6909.02	0.359345	603.46	0.254144	0.192006	0.0012105	0.306774	85369	14.2467	Yanliang District	Xi’an City
2014	2	0.39127	0.099988	26.26	15.7115	0.00149549	186987	7.4158	5367.94	7962.38	0.360816	595.278	0.296767	0.181969	0.00121546	0.311998	81003	14.1667	Yanliang District	Xi’an City
2015	2	0.476715	0.130272	26.27	15.8646	0.00110815	220632	7.33723	5187.23	7845.02	0.364406	589.189	0.283978	0.192262	0.00122755	0.35411	88211	14.2734	Yanliang District	Xi’an City
2016	2	0.459107	0.101983	26.49	16.4675	0.000982144	230682	7.32125	324.263	7930.48	0.364901	583.503	0.296878	0.196771	0.00109983	0.354274	86790	13.9667	Yanliang District	Xi’an City
2017	2	0.501461	0.090913	29.47	15.9139	0.00160038	239536	8.15112	1773.84	9822.53	0.369008	518.663	0.329156	0.171781	0.00104678	0.354417	84826	14.019	Yanliang District	Xi’an City
2018	2	0.591791	0.088386	30.12	15.9325	0.0010479	217355	8.33453	3223.42	10226.9	0.37264	502.523	0.234793	0.178453	0.000858879	0.354542	120276	18.5134	Yanliang District	Xi’an City
2019	2	0.625874	0.096645	30.45	15.7446	0.00142616	224871	8.37635	4673	10429.8	0.371609	498.456	0.261294	0.191141	0.000724733	0.354653	114974	17.9001	Yanliang District	Xi’an City
2020	2	0.605235	0.081562	30.3	15.3432	0.00156114	209809	8.22112	3851.86	10186.1	0.370584	502.31	0.288123	0.212259	0.000591327	0.354752	109672	18.0001	Yanliang District	Xi’an City
2013	3	0.322041	0.052175	71.39	15.7913	0.00125505	272237	3.17383	244.472	2473.66	0.328279	656.577	0.120119	0.227731	0.00121353	0.30802	326809	70.807	Lintong District	Xi’an City
2014	3	0.426894	0.084558	71.85	14.9153	0.00174768	293966	3.22129	252.133	2526.83	0.33097	647.07	0.124708	0.232543	0.00130962	0.313256	317870	68.987	Lintong District	Xi’an City
2015	3	0.476548	0.102886	71.11	14.9601	0.00140404	392195	2.74824	258.498	2099.85	0.33273	650.345	0.121146	0.286761	0.00132545	0.346273	328636	66.8337	Lintong District	Xi’an City
2016	3	0.313258	0.073407	71.55	15.5131	0.00123372	384236	2.55919	265.274	1999.08	0.335048	641.873	0.126064	0.310956	0.00101619	0.347652	316894	65.467	Lintong District	Xi’an City
2017	3	0.311956	0.053564	68.99	15.0499	0.00181409	406723	3.23578	358.821	2412.85	0.335516	664.763	0.131271	0.266145	0.000890186	0.348847	304775	63.695	Lintong District	Xi’an City
2018	3	0.397851	0.074433	69.69	15.0177	0.00133687	436318	3.48236	452.369	2593.1	0.336007	657.124	0.123598	0.253287	0.00088221	0.349894	329083	66.867	Lintong District	Xi’an City
2019	3	0.497249	0.094459	70.04	14.8678	0.00175636	458230	3.4652	545.917	2649.54	0.34855	630.311	0.117923	0.274475	0.000956407	0.350818	332607	66.7403	Lintong District	Xi’an City
2020	3	0.554005	0.100687	67.6	14.4439	0.00170752	465366	3.73566	558.726	2756.97	0.362066	628.683	0.138883	0.289328	0.00099583	0.35164	336131	66.807	Lintong District	Xi’an City
2013	4	0.370215	0.090918	104	12.599	0.00275767	447600	3.54949	78.7346	2324.6	0.105867	419.029	0.0842158	8.39776e-06	0.00100966	0.301151	357700	73.7769	Chang’an District	Xi’an City
2014	4	0.434866	0.104311	106	11.7326	0.00301236	497307	3.96883	68.1847	2649.22	0.109899	396.038	0.0884161	9.50806e-06	0.0010243	0.304961	338400	69.995	Chang’an District	Xi’an City
2015	4	0.440786	0.111037	106.53	11.9838	0.00300526	534331	4.81265	496.149	3228.53	0.111363	388.886	0.07898	8.09454e-06	0.00103795	0.324722	345885	6.72336	Chang’an District	Xi’an City
2016	4	0.50028	0.115824	108.3	12.2473	0.00274974	612604	5.61422	246.934	3828.84	0.117229	363.389	0.0658454	7.07214e-06	0.00111803	0.325903	332415	65.5461	Chang’an District	Xi’an City
2017	4	0.433415	0.112374	100.97	12.0376	0.00298489	530795	7.83437	209.067	4981.3	0.143212	319.055	0.0663575	4.93028e-06	0.00108645	0.326927	265260	53.2133	Chang’an District	Xi’an City
2018	4	0.336587	0.074941	104.28	11.6014	0.00301288	569454	8.71798	171.201	5724.87	0.147733	299.473	0.102572	2.63994e-06	0.00112075	0.327822	156242	30.9421	Chang’an District	Xi’an City
2019	4	0.416562	0.095526	106.42	11.8426	0.00325898	504679	9.49	133.334	6304.85	0.14762	293.676	0.0988585	2.69674e-06	0.00115189	0.328611	157518	26.3732	Chang’an District	Xi’an City
2020	4	0.555117	0.133776	158.6	11.4573	0.00334963	493600	7.16425	117.152	7155.23	0.147507	197.207	0.0952051	1.73377e-05	0.00118298	0.329313	158794	27.4649	Chang’an District	Xi’an City
2013	5	0.193249	0.028902	65	12.1283	0.00203328	234900	1.64446	144221	542.864	0.144611	613.523	0.136398	0.407962	0.000752276	0.286916	264600	64.0937	Lantian County	Xi’an City
2014	5	0.127066	0.03075	66	11.3581	0.00265021	251369	1.7947	123948	590.479	0.145143	602.015	0.187618	0.390393	0.000780208	0.293069	250600	63.8337	Lantian County	Xi’an City
2015	5	0.165248	0.041634	65	11.4636	0.00257095	301002	1.73969	103675	563.709	0.145337	610.462	0.177435	0.411745	0.00078125	0.31141	260422	63.2403	Lantian County	Xi’an City
2016	5	0.268741	0.07357	65.53	11.7601	0.00221773	356183	1.86846	83402.4	610.369	0.384643	228.796	0.180803	0.402253	0.00226772	0.314611	255720	62.887	Lantian County	Xi’an City
2017	5	0.242394	0.047699	53.26	11.5847	0.00267765	357590	2.69414	63129.6	715.304	0.146936	736.913	0.184239	0.375653	0.000636975	0.317376	253850	62.208	Lantian County	Xi’an City
2018	5	0.277026	0.048319	53.68	11.2888	0.00244346	387317	2.94212	42856.9	786.79	0.147398	728.856	0.274354	0.313044	0.000638978	0.319787	170353	40.3002	Lantian County	Xi’an City
2019	5	0.320958	0.070872	53.61	11.4123	0.00272959	427514	2.78362	22584.1	743.937	0.147882	727.42	0.268544	0.346505	0.000641075	0.32191	171041	40.2135	Lantian County	Xi’an City
2020	5	0.359312	0.073299	49.2	11.165	0.00280175	444300	2.95692	2311.38	712.68	0.148369	790.02	0.265931	0.377799	0.000643186	0.323792	171729	40.1269	Lantian County	Xi’an City
2013	6	0.257043	0.051703	68	11.3538	0.00333917	248600	1.28912	9015.75	297.253	0.131484	489.162	0.20368	0.524861	0.00129273	0.28509	230700	52.6803	Zhouzhi County	Xi’an City
2014	6	0.413785	0.099069	69	10.4675	0.00342017	284284	1.48696	7751.87	327.383	0.13146	482.159	0.150052	0.496376	0.00135261	0.289513	224955	51.3403	Zhouzhi County	Xi’an City
2015	6	0.395752	0.091811	68	10.8985	0.00310335	341695	1.53294	6487.99	350.488	0.132705	484.662	0.208106	0.489049	0.00145644	0.307803	231714	49.8469	Zhouzhi County	Xi’an City
2016	6	0.497183	0.119148	68.94	11.003	0.00290529	380428	1.66797	5224.11	387.302	0.110799	572.57	0.237103	0.49798	0.00121602	0.312152	222595	48.6602	Zhouzhi County	Xi’an City
2017	6	0.452151	0.072771	58.94	10.8232	0.00330402	398852	2.278	3960.23	452.206	0.133178	557.177	0.255388	0.44053	0.00100487	0.315902	206556	45.097	Zhouzhi County	Xi’an City
2018	6	0.415334	0.048848	59.41	10.279	0.00355655	458309	2.46243	2696.35	492.657	0.133654	550.8	0.443125	0.403087	0.00106958	0.31917	119095	25.5468	Zhouzhi County	Xi’an City
2019	6	0.462874	0.051541	59.29	10.5203	0.00370936	424000	2.31326	1432.47	465.673	0.134055	550.261	0.436035	0.471329	0.00104215	0.322043	120206	25.5001	Zhouzhi County	Xi’an City
2020	6	0.559059	0.063485	55.7	10.1866	0.00366098	428194	2.53411	168.595	473.448	0.134459	583.968	0.432025	0.504346	0.00101454	0.324588	121317	25.3268	Zhouzhi County	Xi’an City
2013	7	0.188469	0.041704	32	16.8518	0.00105553	184100	8.74813	12748.2	9521.77	0.23383	474.906	0.384834	0.142707	0.00177667	0.318533	198200	29999	Gaoling District	Xi’an City
2014	7	0.356537	0.077718	33	15.9151	0.00150445	202716	9.93636	12946.5	10207.1	0.234927	458.364	0.241698	0.156	0.00185112	0.322661	190374	28882.3	Gaoling District	Xi’an City
2015	7	0.52412	0.133557	33	15.9507	0.00120492	255373	8.83333	13144.8	9911.56	0.235706	456.848	0.0817195	0.170025	0.00192359	0.356479	192757	27765.6	Gaoling District	Xi’an City
2016	7	0.521244	0.118695	33.22	16.5735	0.00106617	232310	9.37929	13343	10212.2	0.0948438	1127.84	0.0745824	0.185161	0.000667254	0.358013	187779	26648.9	Gaoling District	Xi’an City
2017	7	0.583885	0.104729	35.7	16.0439	0.00165236	253141	1.56325	13541.3	12826.5	0.243308	409.104	0.0774746	0.161121	0.00143786	0.359342	179220	25532.2	Gaoling District	Xi’an City
2018	7	0.570001	0.134907	36.26	16.0645	0.00114133	340275	1.43713	13739.6	12872.4	0.239989	408.356	0.107617	0.127601	0.00148578	0.360505	123558	24415.5	Gaoling District	Xi’an City
2019	7	0.633406	0.144152	36.71	15.8387	0.00157977	356266	1.19995	13937.9	12736.1	0.240622	402.288	0.104144	0.141259	0.00155742	0.361531	122926	23298.8	Gaoling District	Xi’an City
2020	7	0.7518	0.171784	44.2	15.2236	0.00154637	280141	8.47262	14136.2	12737.8	0.241259	333.235	0.100635	0.15353	0.00162944	0.362443	122294	22182.2	Gaoling District	Xi’an City
2013	8	0.241046	0.040499	61	12.6897	0.00321217	236100	2.54492	2643.59	1210.92	0.203854	623	0.136506	0.288037	0.00121043	0.305157	303400	11.3607	Huyi District	Xi’an City
2014	8	0.375202	0.09604	61	11.7542	0.00326156	269178	2.65582	276.423	1263.34	0.206395	615.328	0.131929	0.29741	0.00133209	0.311334	296007	10.7925	Huyi District	Xi’an City
2015	8	0.44566	0.132011	61	12.0849	0.0031336	338906	2.47279	27544.9	1179.36	0.206472	615.098	0.120311	0.328928	0.00133259	0.343327	304943	7.77564	Huyi District	Xi’an City
2016	8	0.459458	0.12799	61.22	12.3288	0.0029919	402850	2.65959	287.987	1273.03	0.235609	537.096	0.115268	0.316609	0.000638667	0.343551	297776	17.3438	Huyi District	Xi’an City
2017	8	0.502886	0.130553	54.93	12.1016	0.00326143	407011	3.59385	18702.4	1382.42	0.219812	641.617	0.11881	0.251459	0.00139031	0.343745	269000	26.912	Huyi District	Xi’an City
2018	8	0.438921	0.110716	55.86	11.563	0.00344784	430239	3.88937	37116.9	1740.87	0.229985	603.025	0.165962	0.206063	0.00148434	0.343916	191315	36.4802	Huyi District	Xi’an City
2019	8	0.520301	0.126023	56.46	11.8835	0.00350026	358400	3.19217	55531.3	1444.15	0.230245	595.944	0.156871	0.268967	0.00148602	0.344068	195893	37.2069	Huyi District	Xi’an City
2020	8	0.723008	0.160544	57.7	11.5035	0.00360737	387000	4.48717	54712.6	1871.88	0.230505	582.478	0.153089	0.223376	0.0014877	0.344203	200471	31.3735	Huyi District	Xi’an City
2013	9	0.217205	0.053744	61	11.6679	0.00230089	175936	2.67656	6238.37	659.021	0.276091	739.082	0.135894	0.247819	0.00082069	0.255526	231078	58.895	Chencang District	Baoji City
2014	9	0.343464	0.077975	60.46	10.8671	0.00239424	183899	2.87198	6263.88	702.427	0.276803	743.764	0.136659	0.241854	0.000911759	0.258431	224800	58.118	Chencang District	Baoji City
2015	9	0.315609	0.082833	60	11.187	0.00228854	234520	2.462	6277.83	597.573	0.276711	749.717	0.13365	0.292105	0.000955917	0.253798	233370	58.102	Chencang District	Baoji City
2016	9	0.36131	0.083667	60.7	11.554	0.00195802	208099	2.71466	15769.2	666.586	0.279087	734.761	0.136975	0.272865	0.000852018	0.254845	226699	57.437	Chencang District	Baoji City
2017	9	0.426023	0.086145	60.5	11.2192	0.00240711	181800	3.16336	13320.7	788.546	0.280029	734.711	0.141568	0.238497	0.00087739	0.25575	224139	57.425	Chencang District	Baoji City
2018	9	0.39627	0.081559	60.39	10.764	0.00244382	204100	3.52449	10872.1	876.984	0.280844	733.913	0.165176	0.188022	0.000925069	0.25654	197274	50.892	Chencang District	Baoji City
2019	9	0.571283	0.125366	60.25	10.7872	0.00271608	235300	3.55867	8423.57	883.42	0.285646	723.253	0.149701	0.209541	0.000940885	0.257236	203032	50.799	Chencang District	Baoji City
2020	9	0.763197	0.169163	47.92	10.5352	0.00321644	256600	4.62644	8488.99	908.771	0.290614	893.802	0.135078	0.225947	0.000957251	0.257853	208790	50.706	Chencang District	Baoji City
2013	10	0.354144	0.080182	33	11.8603	0.00347558	149695	2.74455	156.237	1056.83	0.133984	702.667	0.328446	0.366317	0.000862515	0.241796	126030	23.401	Mei County	Baoji City
2014	10	0.459095	0.115766	33	11.0266	0.00348953	164704	3.17667	15543.7	1220.89	0.13414	701.848	0.33267	0.347224	0.000949873	0.245907	126173	22.594	Mei County	Baoji City
2015	10	0.414973	0.098499	33	11.392	0.00313553	179783	3.2397	15624.2	1246.04	0.133707	704.121	0.356689	0.351387	0.000989843	0.241458	123284	22.308	Mei County	Baoji City
2016	10	0.432745	0.107554	32.83	11.6744	0.00287616	190612	3.51843	13839.6	1346.27	0.134059	705.909	0.374404	0.334787	0.000949299	0.242647	117587	21.566	Mei County	Baoji City
2017	10	0.481326	0.107319	30.5	11.3509	0.00314599	196631	4.22689	15623.8	1502.56	0.134071	759.77	0.379866	0.303168	0.00103569	0.243675	116083	21.28	Mei County	Baoji City
2018	10	0.421539	0.054497	30.43	10.8787	0.00380421	209778	4.51584	17408.1	1596.51	0.134082	761.453	0.614557	0.279431	0.00107893	0.244574	72501	13.112	Mei County	Baoji City
2019	10	0.513339	0.06808	30.36	11.0435	0.00395849	212092	5.31122	19192.3	1878.96	0.134372	761.561	0.609617	0.257477	0.00181653	0.245366	73228	13.087	Mei County	Baoji City
2020	10	0.624332	0.083062	28.12	10.8999	0.0038222	218675	6.29498	1937.39	2063.11	0.134664	820.448	0.604773	0.252756	0.00255732	0.24607	73955	13.062	Mei County	Baoji City
2013	11	0.216794	0.053666	45	13.8692	0.00170869	162189	2.114	1637.33	1349.36	0.603219	727	0.193613	0.346812	0.00128381	0.24331	273050	48.471	Fufeng County	Baoji City
2014	11	0.349602	0.082787	45	13.0489	0.00213601	176399	2.23489	16454	1426.52	0.609178	719.889	0.191794	0.348714	0.00132737	0.247458	265514	48.427	Fufeng County	Baoji City
2015	11	0.401086	0.102297	45	13.1552	0.00191132	201819	2.17489	16523.2	1388.23	0.620537	706.711	0.179795	0.369681	0.00138356	0.241704	280898	48.484	Fufeng County	Baoji City
2016	11	0.42346	0.117727	45.13	13.7904	0.00158124	218789	2.39663	631.314	1534.18	0.632977	690.826	0.182936	0.346637	0.0011547	0.242886	272954	47.899	Fufeng County	Baoji City
2017	11	0.499801	0.126427	42.37	13.3056	0.00208788	222691	2.94195	7835.42	1768.09	0.639935	727.826	0.179286	0.307487	0.00136196	0.243908	269563	47.916	Fufeng County	Baoji City
2018	11	0.537284	0.131692	42.26	12.8238	0.00211562	236639	3.39789	15039.5	1984	0.644681	724.349	0.188909	0.258162	0.00143739	0.244802	257351	45.264	Fufeng County	Baoji City
2019	11	0.627944	0.152815	42.15	12.9696	0.00222877	251675	3.49897	22243.6	2087.11	0.64601	724.745	0.189227	0.257759	0.00114574	0.24559	256168	45.184	Fufeng County	Baoji City
2020	11	0.756368	0.176573	31.32	12.8398	0.00248101	258200	4.93317	2241.96	2191.58	0.647345	973.34	0.189548	0.257235	0.000852878	0.24629	254985	45.104	Fufeng County	Baoji City
2013	12	0.437645	0.069563	52	12.7246	0.0016463	176949	3.11462	13654.5	1373.71	0.47641	891.058	0.152976	0.229181	0.00088486	0.261562	260048	56.132	Fengxiang District	Baoji City
2014	12	0.509976	0.093118	53	11.9003	0.00194458	190019	3.43377	13777.1	1542.07	0.47644	874.189	0.165003	0.218919	0.000928084	0.265404	256353	55.271	Fengxiang District	Baoji City
2015	12	0.469383	0.096938	52.26	12.0899	0.00175558	220305	3.59285	13723.7	1592.54	0.481838	876.636	0.163894	0.216678	0.000960426	0.260672	264037	55.007	Fengxiang District	Baoji City
2016	12	0.303503	0.054208	53	12.5819	0.00148016	245255	3.81275	16613.5	1713.66	0.482776	862.717	0.168539	0.208859	0.000787333	0.261734	256439	54.341	Fengxiang District	Baoji City
2017	12	0.32724	0.054465	52.68	12.1852	0.00190658	197257	3.96453	11699	1771.42	0.484227	865.357	0.17144	0.206964	0.000811635	0.262654	253150	54.301	Fengxiang District	Baoji City
2018	12	0.366376	0.06843	49.21	11.7915	0.00184924	210928	4.45598	6784.43	1838.84	0.480893	932.798	0.167782	0.185598	0.000806048	0.263458	256816	55.357	Fengxiang District	Baoji City
2019	12	0.409426	0.063603	48.98	11.7489	0.00196312	220638	4.56625	1869.88	1896.99	0.483463	932.197	0.168525	0.196182	0.000657045	0.264167	255007	55.266	Fengxiang District	Baoji City
2020	12	0.483642	0.065047	48.75	11.5929	0.00263645	249320	4.91829	18746.8	2033.64	0.48606	931.59	0.169279	0.198178	0.000550479	0.264797	253198	55.175	Fengxiang District	Baoji City
2013	13	0.37634	0.061949	48	12.9733	0.00200879	168248	3.1875	6443.27	1683.29	0.43956	734.042	0.093111	0.244239	0.000737924	0.264278	265060	48.626	Qishan County	Baoji City
2014	13	0.494068	0.093638	47.7	12.1019	0.00236481	172759	3.12579	6473.42	1741.82	0.439522	738.721	0.0924476	0.252105	0.00107841	0.268643	265783	48.292	Qishan County	Baoji City
2015	13	0.269748	0.061312	48	12.3033	0.00221684	203824	2.99688	6445.22	1680.49	0.439522	734.104	0.0925391	0.267308	0.00105003	0.264089	270048	48.201	Qishan County	Baoji City
2016	13	0.32956	0.069861	47.36	12.8034	0.00190867	269664	3.29624	655.591	1823.71	0.439385	744.257	0.0939811	0.254235	0.000879483	0.264999	262308	47.593	Qishan County	Baoji City
2017	13	0.429824	0.072329	46.72	12.3951	0.00229459	251873	4.37457	3322.87	2203.62	0.438874	755.33	0.0943518	0.216541	0.000963473	0.265785	258649	47.526	Qishan County	Baoji City
2018	13	0.404114	0.070939	46.6	11.9418	0.00242996	261159	4.14372	5990.15	2255.81	0.438912	757.21	0.107025	0.202258	0.000963555	0.266472	226246	40.684	Qishan County	Baoji City
2019	13	0.462911	0.077828	46.48	12.0173	0.00252029	266868	3.8584	8657.43	2095.07	0.438937	759.122	0.110207	0.235452	0.00107698	0.267077	223824	40.612	Qishan County	Baoji City
2020	13	0.553186	0.093234	36.52	11.9512	0.00281355	262599	4.63189	8771.97	1975.4	0.438949	966.128	0.113459	0.268463	0.00119037	0.267614	221402	40.54	Qishan County	Baoji City
2013	14	0.20376	0.051219	27	10.7252	0.00209643	130086	1.84747	1616.55	219.06	0.253615	1312.44	0.13144	0.574902	0.000451518	0.249429	101012	33.922	Long County	Baoji City
2014	14	0.307338	0.065322	27	9.99992	0.00234746	139004	2.11737	1646.93	251.032	0.253308	1314.04	0.134784	0.534113	0.000479157	0.251763	100101	32.679	Long County	Baoji City
2015	14	0.296508	0.081463	27	10.3015	0.00202375	154625	2.21475	166.659	262.538	0.253572	1312.67	0.129326	0.524709	0.000507872	0.238696	105230	32.73	Long County	Baoji City
2016	14	0.339339	0.065998	27.28	10.6721	0.00173141	173820	2.47617	2244.57	296.662	0.25378	1298.13	0.130602	0.487026	0.000423573	0.23972	103314	32.269	Long County	Baoji City
2017	14	0.396204	0.053265	25.29	10.3921	0.00206736	183691	3.35389	1601.22	372.508	0.254103	1398.5	0.14488	0.408836	0.000508935	0.240602	100000	31.944	Long County	Baoji City
2018	14	0.423646	0.065849	25.25	9.92996	0.0021587	183691	3.85827	957.876	427.849	0.254161	1400.4	0.140057	0.324543	0.00050905	0.24137	103672	32.3315	Long County	Baoji City
2019	14	0.544727	0.084161	25.2	9.97757	0.00239895	235636	3.63352	314.53	402.077	0.254297	1402.42	0.136045	0.375708	0.000707394	0.242044	104296	32.719	Long County	Baoji City
2020	14	0.716158	0.102473	20.85	9.66812	0.00284221	243907	4.73199	337.339	433.297	0.254434	1694.1	0.132082	0.376813	0.000905951	0.242641	104920	33.1065	Long County	Baoji City
2013	15	0.20922	0.04176	13	12.4439	0.00164994	84702	2.38538	384.924	311.033	0.423193	1428.77	0.228907	0.498833	0.000753742	0.240487	55053	19.506	Qianyang County	Baoji City
2014	15	0.309447	0.06667	13	11.7181	0.00194804	97571	2.69692	3813.16	351.655	0.423353	1428.23	0.230119	0.458103	0.000754026	0.244285	56297	19.004	Qianyang County	Baoji City
2015	15	0.35048	0.089331	13	11.896	0.00169192	104636	3.16238	384.568	412.337	0.423695	1427.08	0.213061	0.410275	0.000808538	0.231054	58908	18.559	Qianyang County	Baoji City
2016	15	0.405364	0.075631	13.46	12.3347	0.00145761	121453	3.61516	3928.13	488.064	0.422624	1381.8	0.218015	0.372561	0.00059143	0.232046	56707	18.238	Qianyang County	Baoji City
2017	15	0.473966	0.088212	12.59	11.9803	0.00179679	119431	4.31612	4416.63	545.035	0.42086	1483.48	0.223997	0.338653	0.000642501	0.232903	55023	17.867	Qianyang County	Baoji City
2018	15	0.503758	0.1128	12.57	11.681	0.00183157	129604	4.75481	4905.14	599.386	0.421763	1482.66	0.205448	0.276031	0.00064388	0.233651	57455	18.271	Qianyang County	Baoji City
2019	15	0.622204	0.116867	12.54	11.5835	0.00191056	143863	5.39838	5393.65	678.951	0.422966	1481.98	0.217702	0.27536	0.00102238	0.23431	57179	17.536	Qianyang County	Baoji City
2020	15	0.784676	0.120934	9.95	11.2494	0.00249676	148560	7.41939	5462.24	740.45	0.432222	1827.74	0.230076	0.281535	0.00142967	0.234894	56903	16.801	Qianyang County	Baoji City
2013	16	0.372955	0.064465	44.18	10.8526	0.0028429	132242	9.67665	13273.5	7353.7	0.210138	147.216	0.335364	0.0162802	0.00123001	0.283389	22000	7.638	Weibin District	Baoji City
2014	16	0.431154	0.082545	43.48	10.012	0.00279098	157452	1.2569	13315.4	7671.26	0.21392	146.941	0.36155	0.016687	0.00125215	0.286676	20000	7.385	Weibin District	Baoji City
2015	16	0.402132	0.094382	43.63	10.4277	0.00280148	182538	1.77149	13341.8	8088.81	0.228972	136.81	0.104142	0.016461	0.00117273	0.268311	19896	6.704	Weibin District	Baoji City
2016	16	0.256889	0.069706	43.6	10.6352	0.0024089	182538	11.4794	1339.4	8614.46	0.230323	136.101	0.31577	0.0155512	0.00101112	0.268858	15866	5.509	Weibin District	Baoji City
2017	16	0.300275	0.070141	45.61	10.3799	0.00300847	165090	11.6459	1435.51	9142.34	0.245595	122.013	0.381069	0.0152322	0.00107817	0.269332	13512	4.768	Weibin District	Baoji City
2018	16	0.345859	0.076714	45.53	9.90377	0.0029721	188321	11.9987	1531.62	9402.75	0.25184	119.196	0.396675	0.0145742	0.00110558	0.269746	11788	3.924	Weibin District	Baoji City
2019	16	0.375486	0.088374	45.45	10.0165	0.0032727	183678	11.4662	1627.73	8969.71	0.267777	112.299	0.416412	0.0165261	0.00117555	0.27011	10127	3.553	Weibin District	Baoji City
2020	16	0.430672	0.100034	53.58	9.64799	0.0038194	197776	9.99235	14489.3	9214.97	0.269042	94.8115	0.443893	0.0173012	0.0011811	0.270434	8466	3.182	Weibin District	Baoji City
2013	17	0.302062	0.024695	38.47	13.9052	0.00217104	126698	7.16743	7853.69	8923.3	0.187331	279.387	0.180161	0.0149552	0.00130257	0.272671	34114	11.795	Jintai District	Baoji City
2014	17	0.314582	0.0256	38.26	13.1043	0.00220695	140635	7.72216	7993.22	9561.49	0.189714	277.392	0.164481	0.014747	0.00131914	0.274993	33019	11.684	Jintai District	Baoji City
2015	17	0.445103	0.087826	38.01	13.4109	0.00204814	168255	8.39463	899.629	9845.63	0.197861	267.719	0.137823	0.0148562	0.00137579	0.256608	36866	11.566	Jintai District	Baoji City
2016	17	0.176927	0.051628	37.79	13.927	0.00166674	168255	8.9574	874.285	10954.7	0.198917	267.849	0.133067	0.0141524	0.00118554	0.257144	35591	11.415	Jintai District	Baoji City
2017	17	0.289473	0.065546	40.13	13.4608	0.0022783	178504	8.91627	5362.18	11579.6	0.197415	254.149	0.1366	0.0135088	0.00127463	0.257608	35000	11.206	Jintai District	Baoji City
2018	17	0.356649	0.107731	39.98	12.8998	0.00221736	188139	9.27885	9850.08	11995.1	0.198818	253.302	0.117301	0.0116903	0.0012837	0.258013	38269	11.353	Jintai District	Baoji City
2019	17	0.314078	0.081091	39.83	12.9393	0.00246316	192089	9.16269	14338	11810.7	0.200043	252.699	0.125756	0.0127272	0.0012916	0.25837	35696	11.041	Jintai District	Baoji City
2020	17	0.271507	0.05445	46.1	12.6084	0.00332499	196936	7.86443	15726.7	11733	0.203316	214.816	0.135525	0.0136715	0.00131273	0.258687	33123	10.729	Jintai District	Baoji City
2013	18	0.470409	0.118788	54	16.0821	0.00128133	209128	2.51852	46.4358	1704.67	0.403651	822.167	0.160037	0.519537	0.00103611	0.246221	242444	51.531	Jingyang County	Xianyang City
2014	18	0.565898	0.143886	54	15.1756	0.00157016	218719	2.81537	382.566	1919.57	0.409555	810.315	0.152644	0.485296	0.00107411	0.249717	239839	50.815	Jingyang County	Xianyang City
2015	18	0.700643	0.147693	54	15.195	0.00135636	219136	2.96722	3794.86	2023.11	0.415798	798.148	0.138141	0.472235	0.00113689	0.255434	247212	50.469	Jingyang County	Xianyang City
2016	18	0.630292	0.142853	54.21	15.8157	0.00120943	247594	3.32712	3583.93	2260.61	0.422075	783.232	0.144404	0.441985	0.000847877	0.256386	240797	50.1	Jingyang County	Xianyang City
2017	18	0.31682	0.064166	31.66	15.2603	0.00180917	220301	2.39924	2538.89	1332.63	0.426739	1326.44	0.154195	0.695764	0.000928682	0.257209	163222	34.416	Jingyang County	Xianyang City
2018	18	0.304227	0.05209	31.48	15.2003	0.00136223	220964	2.39616	1493.84	1323.35	0.585516	972.268	0.137813	0.632339	0.00120887	0.257927	161015	33.443	Jingyang County	Xianyang City
2019	18	0.321321	0.061575	31.58	15.0683	0.00170691	230159	2.39837	448.799	1328.6	0.581715	975.522	0.169181	0.669584	0.00123349	0.25856	161058	33.384	Jingyang County	Xianyang City
2020	18	0.348604	0.076154	24.17	14.7596	0.00168149	254466	3.34741	466.747	1419.25	0.581715	1274.6	0.200533	0.66402	0.00126595	0.259121	161101	33.4202	Jingyang County	Xianyang City
2013	19	0.221202	0.047657	43	16.021	0.00114554	184626	3.27465	6655.24	2440.38	0.657505	772.279	0.161499	0.347202	0.00084317	0.246371	200001	42.064	Sanyuan County	Xianyang City
2014	19	0.380535	0.102677	42	15.1047	0.00151536	188235	3.81262	6482.65	2775.22	0.659073	788.786	0.144318	0.317897	0.000875366	0.249868	195125	40.834	Sanyuan County	Xianyang City
2015	19	0.461285	0.126641	42	15.1485	0.00122426	222117	4.22929	6473.15	3078.51	0.660548	787.024	0.144318	0.289407	0.000937831	0.255258	201111	40.508	Sanyuan County	Xianyang City
2016	19	0.408077	0.112943	41.76	15.7627	0.00107098	219181	4.63386	6568.3	3353.73	0.66205	789.751	0.144217	0.274307	0.000697392	0.256026	196010	40.192	Sanyuan County	Xianyang City
2017	19	0.459745	0.101876	41.23	15.2392	0.00167363	238264	5.72617	7009.79	4091.68	0.66362	798.011	0.14963	0.229451	0.000759832	0.256691	194981	39.816	Sanyuan County	Xianyang City
2018	19	0.461061	0.134877	41.17	15.2609	0.00119468	256131	5.82355	7451.28	4155.21	0.664954	797.571	0.151083	0.197525	0.000761359	0.257272	188916	38.007	Sanyuan County	Xianyang City
2019	19	0.503538	0.140381	41.19	15.0808	0.0015454	279605	5.22816	7892.77	3732.2	0.66668	795.12	0.154907	0.238183	0.000763335	0.257783	188519	37.938	Sanyuan County	Xianyang City
2020	19	0.623378	0.155988	35.73	14.6603	0.00164772	282681	5.8147	7835.84	3600.67	0.667107	916.037	0.158748	0.265822	0.000763825	0.258237	188122	37.869	Sanyuan County	Xianyang City
2013	20	0.27302	0.086677	50	14.7036	0.00149152	200351	2.5572	28271.4	1263.44	0.104813	617	0.899986	0.57032	0.00123177	0.257292	123113	27.41	Liquan County	Xianyang City
2014	20	0.352879	0.077286	51	13.8437	0.00173398	195649	2.84353	28647	1433	0.107665	588.882	0.902283	0.538964	0.00129857	0.260899	120041	26.865	Liquan County	Xianyang City
2015	20	0.422187	0.093031	51	13.8722	0.00154684	186524	2.97759	28767.2	1500.3	0.112021	565.98	0.854577	0.524929	0.00138576	0.266594	125138	26.613	Liquan County	Xianyang City
2016	20	0.45571	0.090666	48.42	14.5132	0.00133611	227528	3.39128	28723	1622.04	0.111979	596.365	0.812847	0.5185	0.000657986	0.26809	121414	26.336	Liquan County	Xianyang City
2017	20	0.539241	0.116391	45.68	14.0293	0.00191455	257975	3.81283	20306.5	1721.05	0.111986	632.093	0.745535	0.509552	0.000692665	0.269388	120158	26.036	Liquan County	Xianyang City
2018	20	0.527533	0.125476	45.58	13.7465	0.00165323	283000	3.52162	11889.9	1586.12	0.112017	633.304	0.711684	0.475343	0.000727499	0.270524	115859	25.51	Liquan County	Xianyang City
2019	20	0.589749	0.141347	45.38	13.7359	0.00182248	286032	3.38255	3473.4	1516.8	0.112115	635.544	0.741481	0.529635	0.00072813	0.271526	112282	25.333	Liquan County	Xianyang City
2020	20	0.659157	0.161811	36.56	13.5256	0.00184008	320209	4.27188	3445.72	1543.28	0.112185	788.375	0.77324	0.552556	0.000728585	0.272418	108705	25.156	Liquan County	Xianyang City
2013	21	0.262287	0.051267	50.63	15.3286	0.00138169	176133	7.41244	2956	29160.1	0.064509	204.128	0.226047	0.0720637	0.00212869	0.251633	62770	13.549	Qindu District	Xianyang City
2014	21	0.507625	0.112071	50.45	14.3657	0.00192601	178070	8.42439	29515.9	33023.3	0.0669243	197.463	0.228217	0.0671984	0.00230877	0.254666	58922	13.101	Qindu District	Xianyang City
2015	21	0.568289	0.128633	51.16	14.4849	0.00177085	179622	9.11923	29298	36250.2	0.0749859	173.788	0.223859	0.0641716	0.00269936	0.259659	60011	12.895	Qindu District	Xianyang City
2016	21	0.320809	0.083461	52.02	15.0824	0.00154946	226998	9.98847	29446.9	40373	0.0782145	163.86	0.23447	0.0609963	0.002229	0.260464	56118	12.07	Qindu District	Xianyang City
2017	21	0.342217	0.09028	35.3	14.5607	0.00193035	225770	11.3598	20844.4	31157.7	0.0782145	241.473	0.261612	0.0328805	0.002229	0.261161	30056	6.365	Qindu District	Xianyang City
2018	21	0.252366	0.050753	35.12	14.2172	0.00165324	218498	1.93417	12242	29745.1	0.186594	101.737	0.301321	0.0340484	0.00307865	0.26177	24834	4.981	Qindu District	Xianyang City
2019	21	0.303836	0.054281	34.9	14.3049	0.00209801	222983	9.85244	3639.57	26717.2	0.18463	103.467	0.280018	0.0391275	0.00304625	0.262307	24752	4.328	Qindu District	Xianyang City
2020	21	0.369451	0.06488	49.16	13.9726	0.0019486	236490	7.36249	36529.1	28122.8	0.187539	72.3149	0.258573	0.0383312	0.00309423	0.262784	24670	3.675	Qindu District	Xianyang City
2013	22	0.169097	0.047361	41.54	15.9011	0.00108345	134161	7.34762	2296.54	11221.3	0	315.936	0.0988821	0.0731656	0.00167632	0.248883	97237	21.279	Weicheng District	Xianyang City
2014	22	0.265395	0.059441	41.57	14.9033	0.00163757	149388	7.61198	22447.8	11633.5	0	304.547	0.0902842	0.0735408	0.00181675	0.252062	92962	20.663	Weicheng District	Xianyang City
2015	22	0.300964	0.07661	41.21	14.9585	0.0014793	158298	7.59743	22541.5	11510.7	0	301.407	0.0967908	0.0769536	0.00193221	0.257086	94916	20.309	Weicheng District	Xianyang City
2016	22	0.240855	0.048514	41.52	15.5931	0.00128337	192938	8.36848	22726.6	12680.1	0	291.426	0.0973792	0.0724735	0.00115702	0.258238	88941	19.123	Weicheng District	Xianyang City
2017	22	0.249824	0.052075	21.6	15.0449	0.00175724	148474	14.7374	16088.7	11173.5	0	553.889	0.0980522	0.0852158	0.00117018	0.259243	82966	17.937	Weicheng District	Xianyang City
2018	22	0.358424	0.071671	21.29	14.8049	0.00136151	134849	17.7886	9450.74	13923.5	0	555.566	0.0988297	0.0707686	0.00118363	0.260127	76991	16.751	Weicheng District	Xianyang City
2019	22	0.352109	0.091266	21.37	14.7885	0.00181285	115913	12.7192	2812.82	9433.46	0	547.122	0.0997381	0.107971	0.0011974	0.260912	71016	15.565	Weicheng District	Xianyang City
2020	22	0.427552	0.109066	30.35	14.4132	0.00162138	117126	9.46787	28378.8	10094.5	0	380.758	0.100813	0.104188	0.00121149	0.261613	65041	14.379	Weicheng District	Xianyang City
2013	23	0.203165	0.056591	60	14.401	0.00140311	196555	2.12167	2515.33	1268.3	0.412704	854.3	1.08899	0.366286	0.000721839	0.256788	253101	55.853	Qian County	Xianyang City
2014	23	0.414261	0.10222	60	13.5637	0.00183678	223096	2.41733	2637.31	1446.06	0.423808	831.917	0.338131	0.354046	0.000761294	0.260208	267077	54.853	Qian County	Xianyang City
2015	23	0.456737	0.105399	60	13.6159	0.00164641	228156	2.51233	2337.76	1502.89	0.436686	807.383	0.346174	0.355145	0.00080507	0.265953	262897	54.519	Qian County	Xianyang City
2016	23	0.455802	0.115607	59.92	14.3364	0.00132134	239018	2.79947	278.4	1618.94	0.453665	778.204	0.357548	0.342479	0.000621917	0.266355	255915	54.181	Qian County	Xianyang City
2017	23	0.472004	0.102912	53.66	13.8448	0.00189542	280015	3.3347	8301.26	1784.05	0.453548	869.214	0.44582	0.315442	0.000621757	0.266705	251617	53.82	Qian County	Xianyang City
2018	23	0.524809	0.131802	53.61	13.3453	0.00175703	290402	3.2396	16324.1	1731.27	0.450486	875.937	0.43917	0.290659	0.00061756	0.267012	254480	54.404	Qian County	Xianyang City
2019	23	0.5549	0.141223	53.57	13.4759	0.00187318	313800	3.23697	24347	1711.09	0.45089	875.807	0.447165	0.306254	0.000639427	0.267284	249713	54.264	Qian County	Xianyang City
2020	23	0.64853	0.158627	45.67	13.3266	0.0019851	320210	3.47515	2452.33	1551.56	0.449481	1030.52	0.455472	0.351163	0.000658678	0.267526	244946	54.124	Qian County	Xianyang City
2013	24	0.193765	0.04973	46	14.0692	0.00170644	165429	2.85652	1454.9	2410.55	0.482784	576.696	0.14274	0.336693	0.00113088	0.259219	200000	40.494	Wugong County	Xianyang City
2014	24	0.377682	0.101988	45	13.2363	0.00223772	172433	2.44533	14754.8	2764.82	0.478474	594.822	0.135396	0.31632	0.0011955	0.26233	197222	39.655	Wugong County	Xianyang City
2015	24	0.428197	0.102294	45	13.4367	0.00198411	195187	2.49889	14859.7	2825.38	0.476002	597.911	0.131252	0.322503	0.00126366	0.268422	203144	39.43	Wugong County	Xianyang City
2016	24	0.460921	0.114493	44.81	14.0582	0.00157348	209098	2.75521	14925.6	3096.73	0.475454	601.138	0.134579	0.312536	0.000965215	0.270092	198003	39.138	Wugong County	Xianyang City
2017	24	0.503894	0.107285	42.09	13.5393	0.00218716	225441	3.34759	16092.9	3540.2	0.475137	640.413	0.137128	0.289039	0.00100167	0.271545	194191	38.87	Wugong County	Xianyang City
2018	24	0.545906	0.137233	41.74	12.9976	0.00214164	247989	3.38376	17260.3	3548.69	0.474925	646.071	0.136631	0.255704	0.00103831	0.27282	194795	38.482	Wugong County	Xianyang City
2019	24	0.645164	0.146251	41.48	13.2049	0.00239419	277382	3.69226	18427.6	3848.12	0.474732	650.386	0.134572	0.255462	0.000593076	0.273949	197849	38.409	Wugong County	Xianyang City
2020	24	0.765775	0.167391	31.77	13.0502	0.00250643	273935	4.86575	18556.9	3884.05	0.464201	868.429	0.132576	0.272572	0.00014498	0.274954	200903	38.336	Wugong County	Xianyang City
2013	25	0.286456	0.070927	62	14.8324	0.00158143	197989	2.82613	22248.3	3449.21	0.417967	577.581	0.0762287	0.206902	0.00086568	0.242574	222003	44.26	Xingping City	Xianyang City
2014	25	0.386661	0.085725	62	13.9102	0.00213611	210795	2.94793	22578.4	3597.83	0.429173	562.5	0.0780064	0.210646	0.000917563	0.245554	216995	43.151	Xingping City	Xianyang City
2015	25	0.445868	0.111215	62	14.0984	0.00193467	251300	3.91924	22647.4	3773.61	0.441204	547.161	0.0755633	0.202854	0.000972763	0.250944	224011	42.946	Xingping City	Xianyang City
2016	25	0.471192	0.098281	61.42	14.71	0.00162907	262500	3.54396	22777.5	4284.84	0.457901	532.188	0.0773515	0.19068	0.000703644	0.252389	218147	42.647	Xingping City	Xianyang City
2017	25	0.563616	0.135105	50.97	14.1838	0.00207742	285083	4.7343	24568.9	5322.52	0.475307	617.814	0.077351	0.163571	0.000730391	0.253644	194671	38.655	Xingping City	Xianyang City
2018	25	0.600275	0.129058	50.61	13.7284	0.001921	289400	4.96742	26360.4	5481.9	0.531797	556.115	0.0758352	0.13162	0.000710606	0.254745	186668	36.448	Xingping City	Xianyang City
2019	25	0.626431	0.157421	50.63	13.8902	0.00226329	308908	4.77274	28151.9	5334.3	0.533959	553.644	0.0818394	0.150921	0.00107024	0.255718	189432	36.386	Xingping City	Xianyang City
2020	25	0.686599	0.15356	46.33	13.6577	0.00219715	312416	5.22577	28395.6	5344.59	0.535373	603.432	0.0876709	0.166259	0.00143077	0.256585	192196	36.3828	Xingping City	Xianyang City
2013	26	0.195065	0.054226	17	14.7644	0.00195643	106600	2.27941	7356.22	736.692	0.265954	626.706	0.274687	0.155365	0.000938615	0.240459	43100	13.294	Tongguan County	Weinan City
2014	26	0.298675	0.074065	16	13.8899	0.00242622	118600	2.56875	747.324	781.369	0.264317	670	0.280573	0.156445	0.000932836	0.243054	41009	13.18	Tongguan County	Weinan City
2015	26	0.327623	0.09261	16	13.8385	0.00237583	142800	2.28437	747.662	694.867	0.265779	666.312	0.256314	0.181289	0.0010318	0.25924	45339	13.361	Tongguan County	Weinan City
2016	26	0.405935	0.115163	15.52	14.22	0.00232433	136600	2.37758	7456.42	701.521	0.267486	682.539	0.263834	0.187225	0.00094402	0.260761	44039	13.421	Tongguan County	Weinan City
2017	26	0.548186	0.146315	15.94	14.1541	0.00247154	138800	2.87139	5032.92	870.152	0.265804	668.758	0.240626	0.156469	0.00121951	0.262079	44056	13.456	Tongguan County	Weinan City
2018	26	0.642025	0.167947	15.42	13.8428	0.00225687	140068	2.61665	2609.42	767.086	0.264737	694.099	0.217309	0.216468	0.00121461	0.263233	44324	13.174	Tongguan County	Weinan City
2019	26	0.700504	0.16744	15.12	14.2729	0.00232468	140289	2.92395	185.917	840.251	0.264317	708.995	0.221278	0.217982	0.000746269	0.264252	42363	13.09	Tongguan County	Weinan City
2020	26	0.769255	0.181638	12.53	13.8574	0.00246732	153036	3.51836	1651.26	838.12	0.264563	854.749	0.225632	0.238951	0.000280112	0.265158	40402	13.2397	Tongguan County	Weinan City
2013	27	0.331285	0.085249	35	12.4829	0.0020457	144750	3.26943	11985.8	1004.65	0.317794	684.514	0.23935	0.135701	0.00125219	0.232256	112300	27.469	Huazhou District	Weinan City
2014	27	0.457761	0.114519	35	11.672	0.00259428	151161	3.37143	11996.2	1016.24	0.318272	683.486	0.2446	0.144148	0.00137948	0.235791	110102	27.583	Huazhou District	Weinan City
2015	27	0.480406	0.107332	34	11.7369	0.00245097	183378	3.17735	11971.2	948.464	0.318272	703.588	0.229371	0.159035	0.00146309	0.251117	117639	27.697	Huazhou District	Weinan City
2016	27	0.415778	0.100779	34.1	12.023	0.00225212	171000	2.58797	11999.7	774.539	0.317874	702.405	0.235959	0.203164	0.00137776	0.252087	114575	27.811	Huazhou District	Weinan City
[truncated: 596 more rows]

## Sheet: Change Sample Interval-Norther
Year	id	Y	Y2	Total population at the end of the year(10,000 people)	Average annual temperature（℃）	Average annual precipitation	Local budget expenditures(10,000 yuan)	Population productivity (million yuan/person)	Effective irrigated area(ha)	Regional economic density(million yuan/square kilometer)	Protection Rate of Permanent Basic Farmland	Cultivated land area per capital (ha/million people)	Fertilizer Application Intensity	Proportion of Gross Output Value of Farming, Forestry, Animal Husbandry and Fishery	Total Mechanical Power per Unit Cultivated Land	Proportion of Per Capita Disposable Income of Rural Residents	Total Grain Output	Sown Area of Grain Crops	xian	County/District
[truncated: 200 more rows]

[truncated: 4 more sheets: Change Sample Interval-Souther, Change Sample Interval- Guanzho, Sheet7, Sheet1]
